# Supplementary material
Source: PubMed Central journal article supplement (PMC3979129)

# Phosphoglycolate phosphatase (A6NDG6)

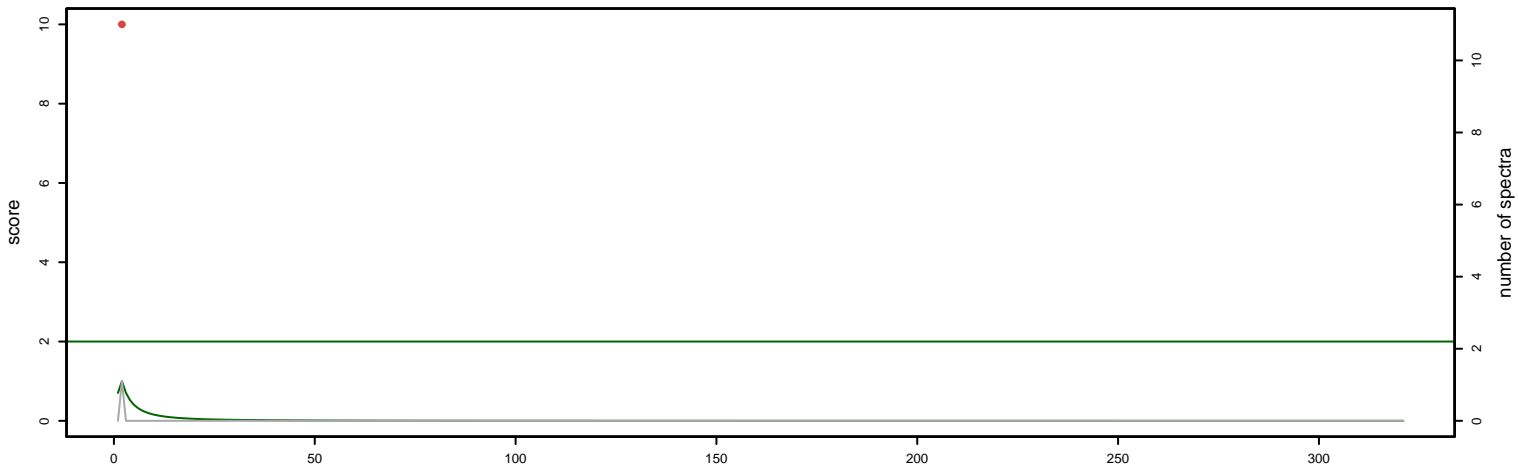

replica

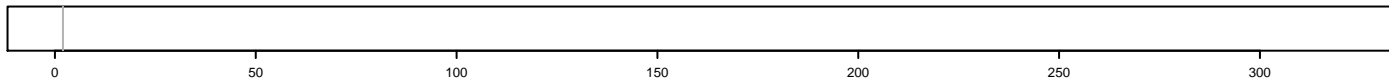

stability

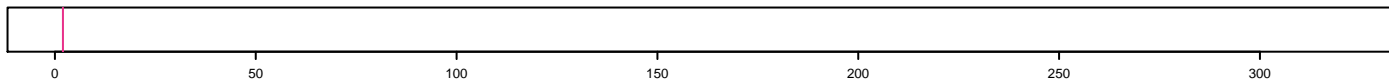

# UPF0600 protein C5orf51 (A6NDU8)

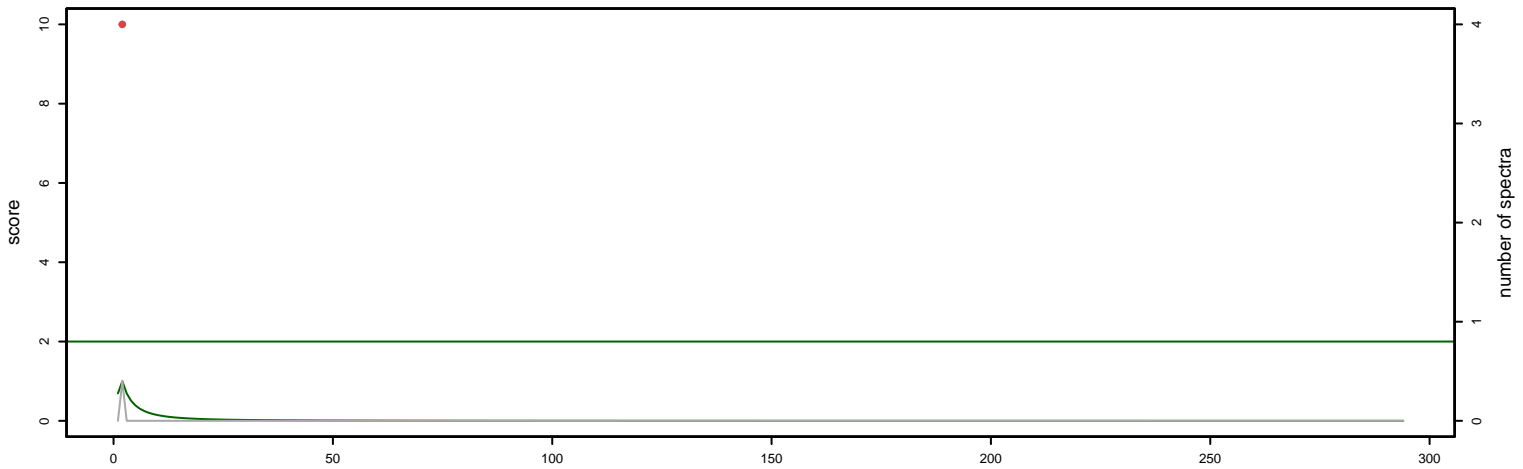

replica

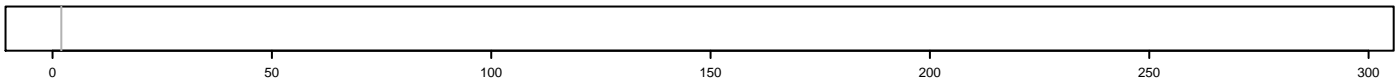

stability

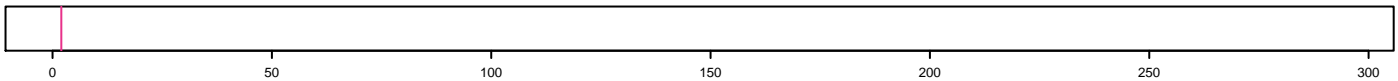

### D-dopachrome decarboxylase-like protein (A6NHG4)

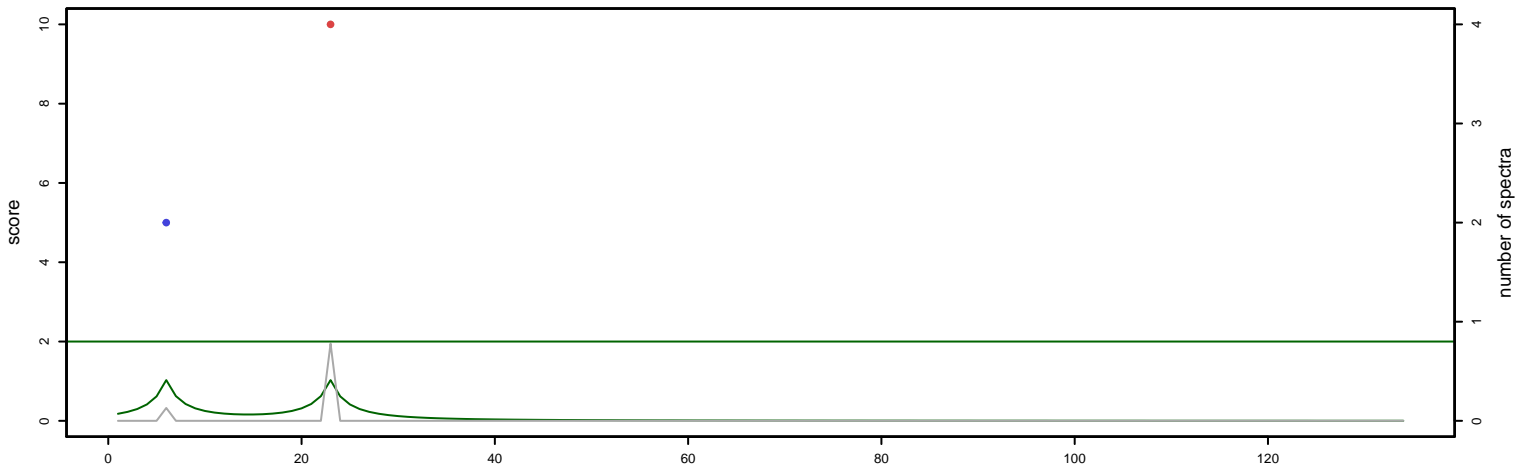

replica

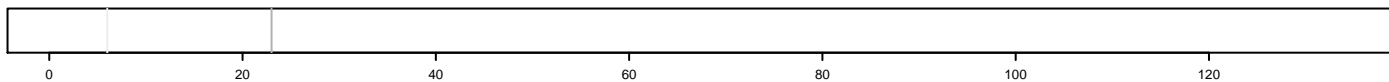

stability

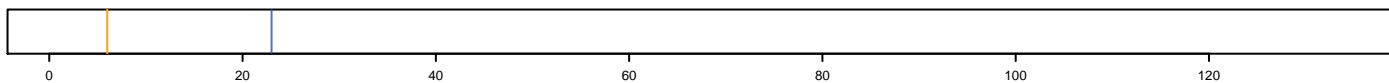

# Putative tropomyosin alpha-3 chain-like protein (A6NL28)

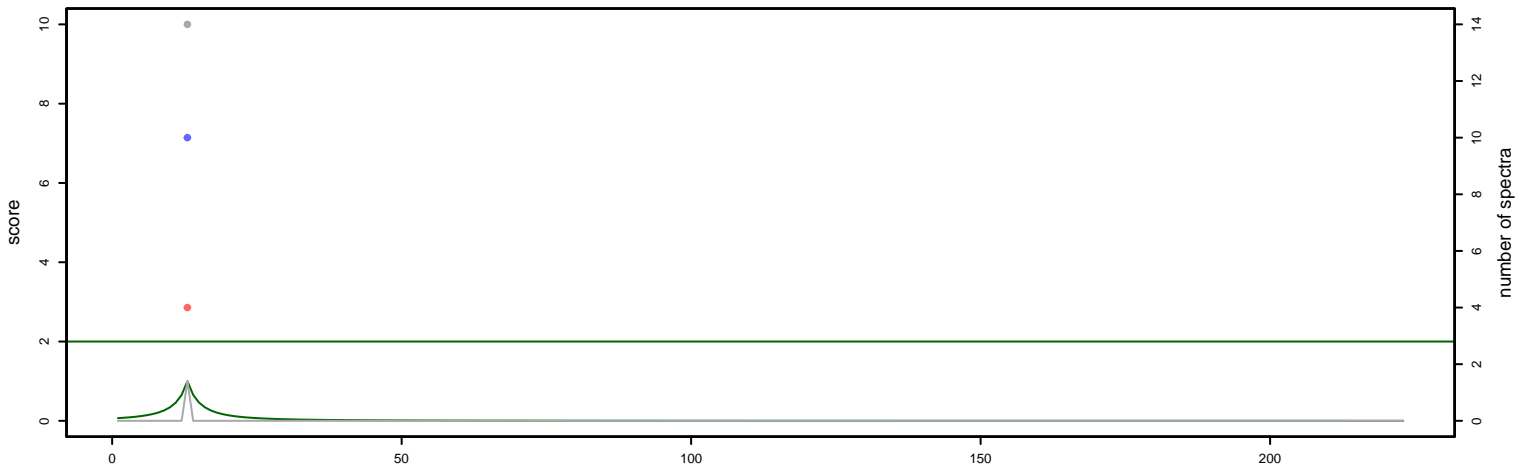

replica

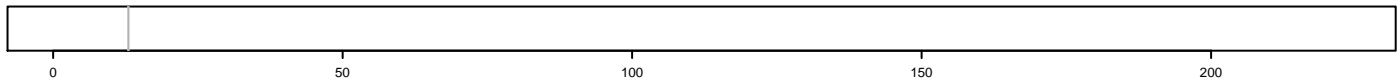

stability

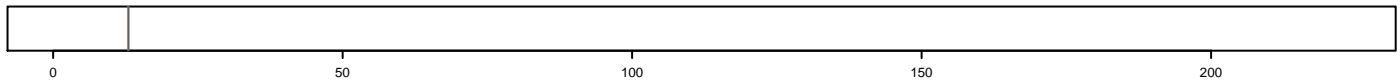

### Small integral membrane protein 1 (B2RUZ4)

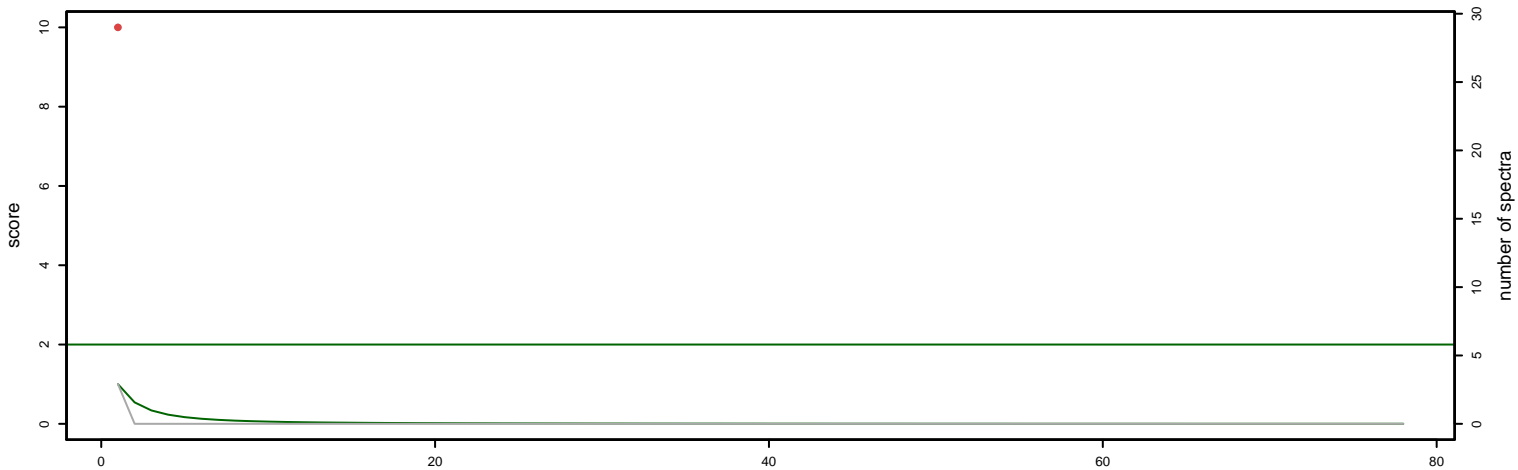

replica

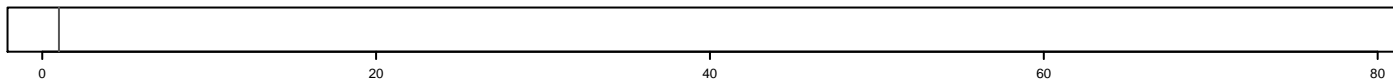

stability

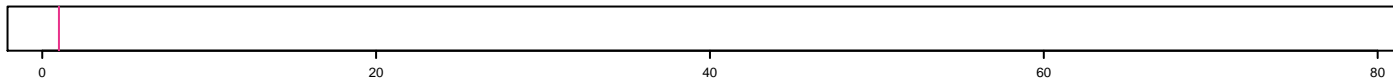

# Protein phosphatase 1 regulatory subunit 7 (B5MCY6)

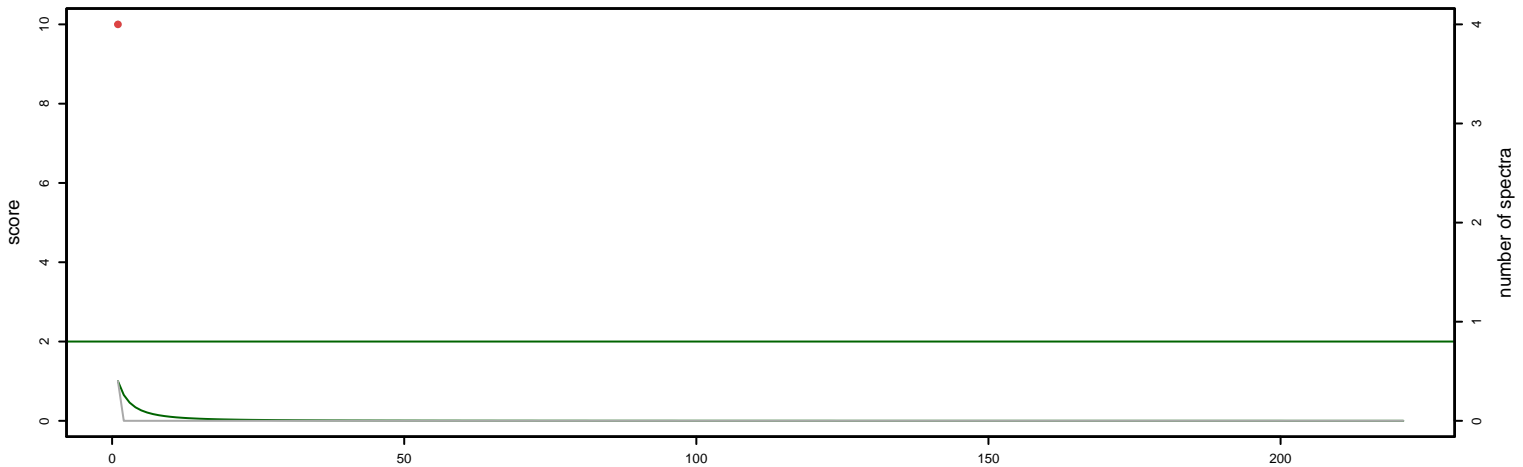

replica

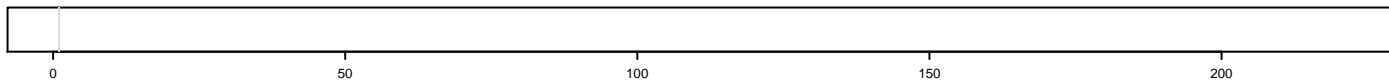

stability

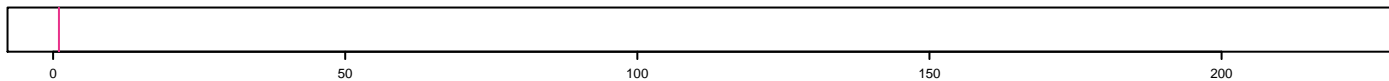

# Carbonic anhydrase 1 (E5RFE7)

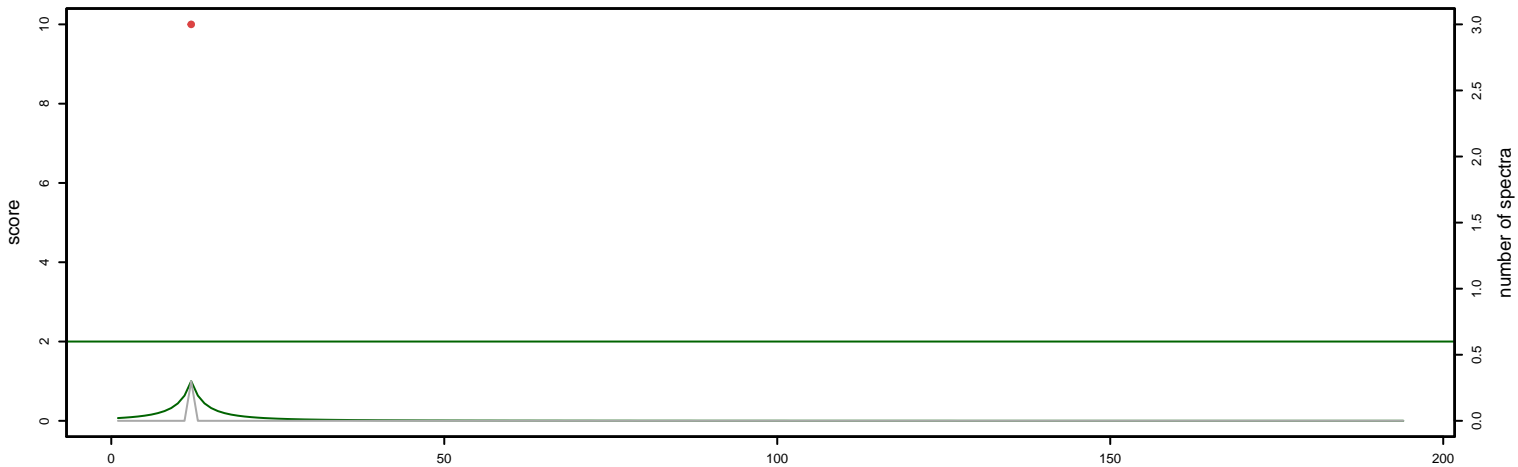

replica

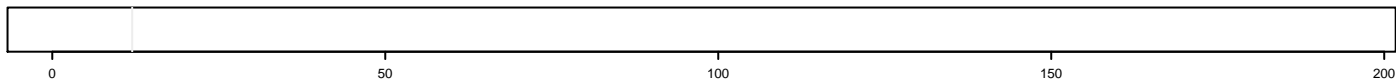

stability

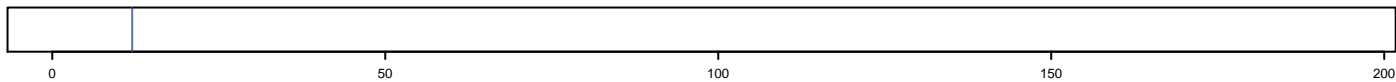

# Protein 4.1 (E9PEW9)

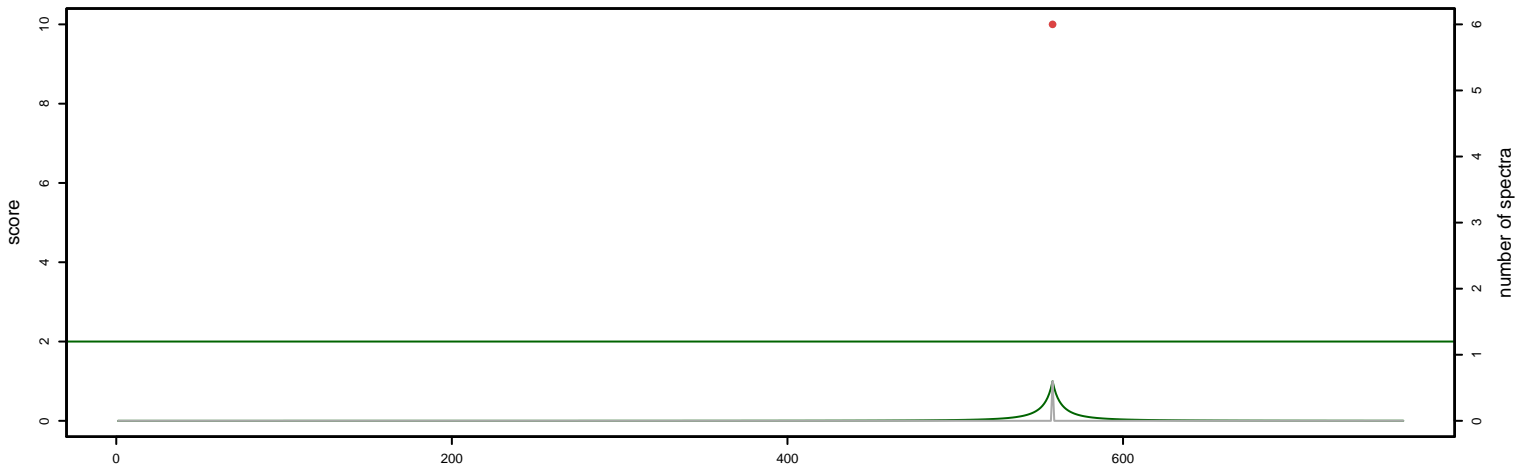

replica

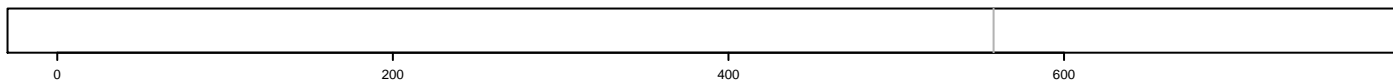

stability

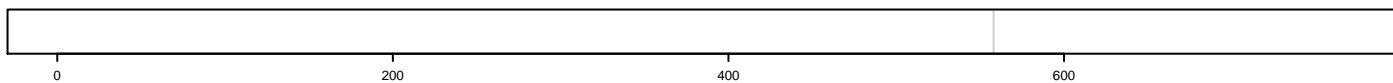



# Heat shock cognate 71 kDa protein (E9PI65)

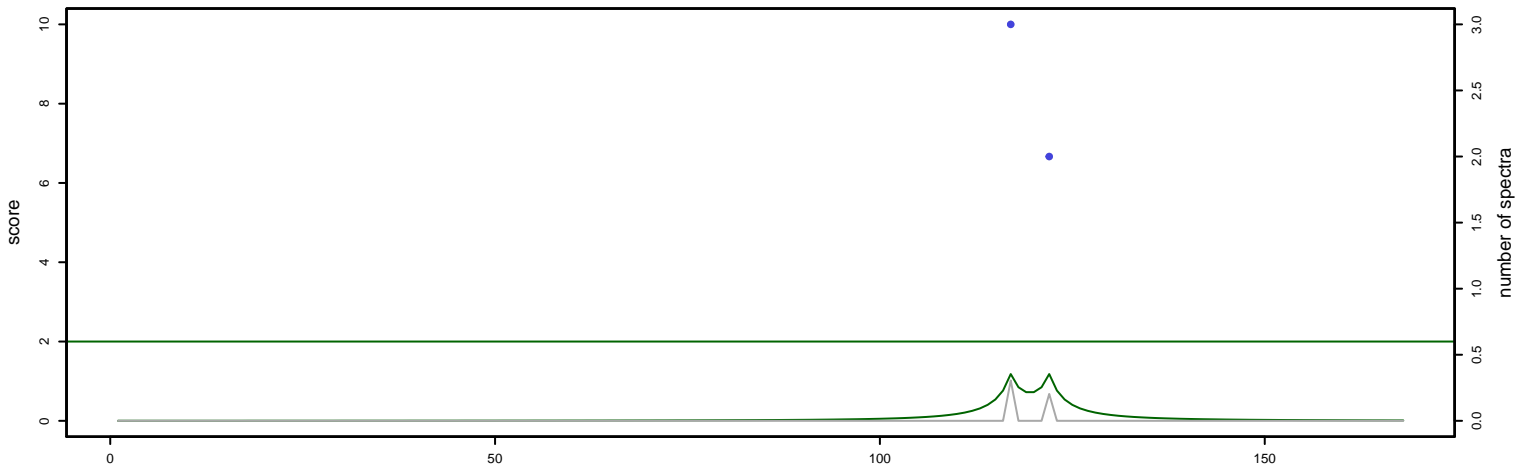

replica

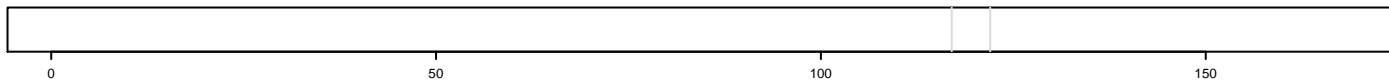

stability

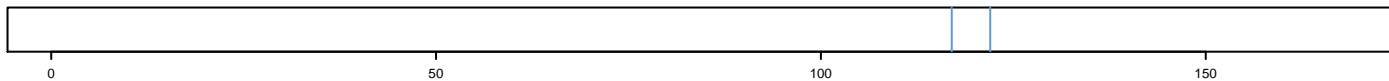

### Ubiquitin carboxyl-terminal hydrolase (E9PM46)

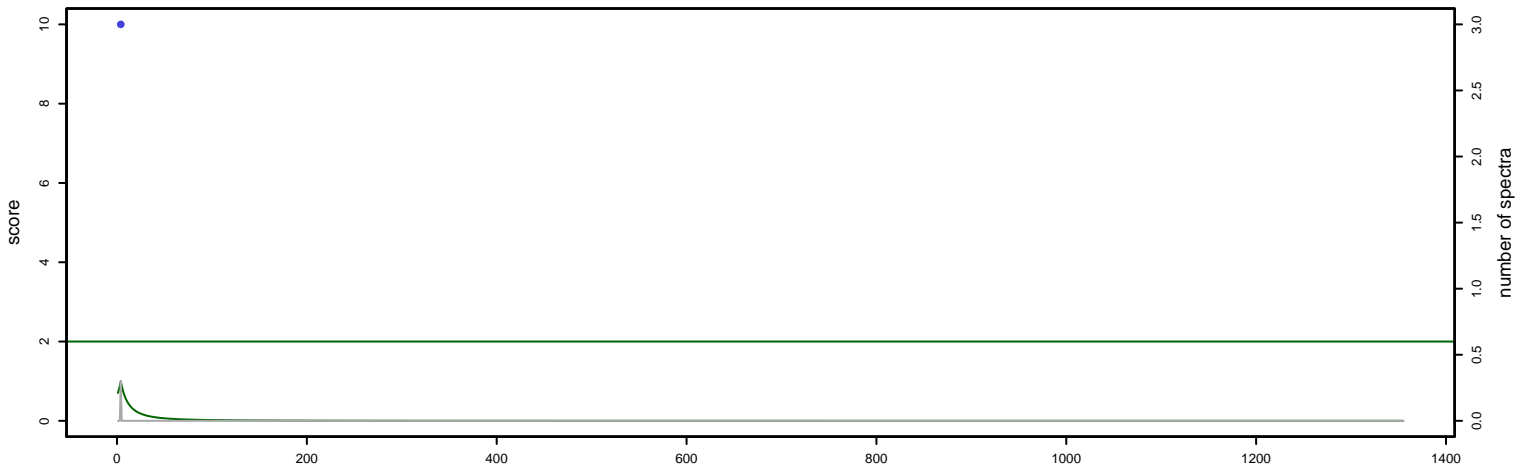

replica

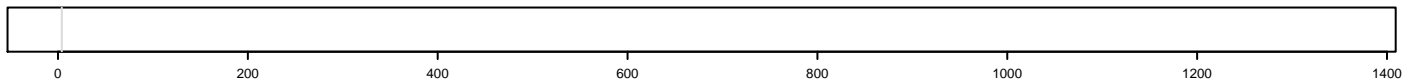

stability

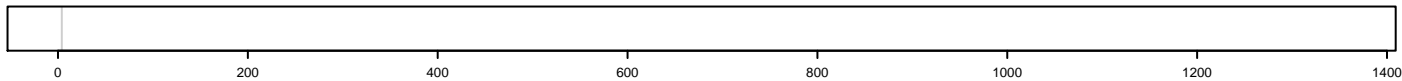

# Proteasome subunit alpha type-1 (F5GX11)

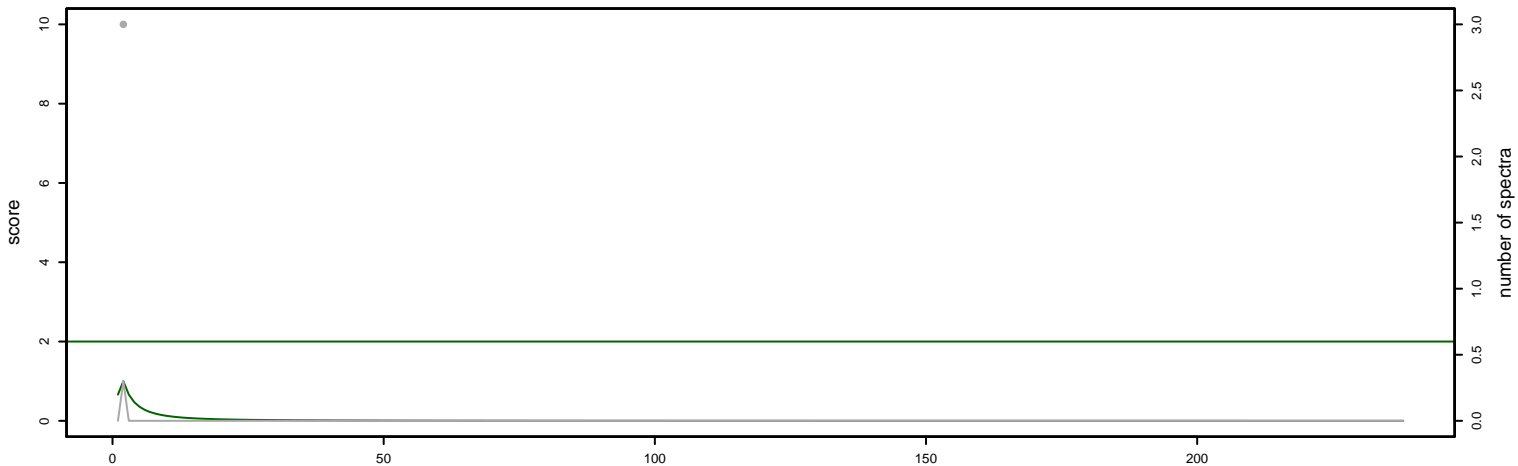

replica

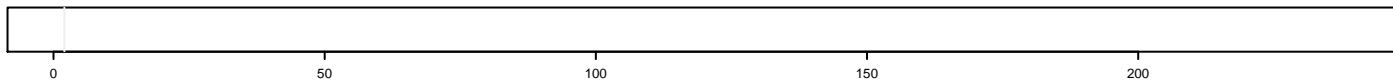

stability

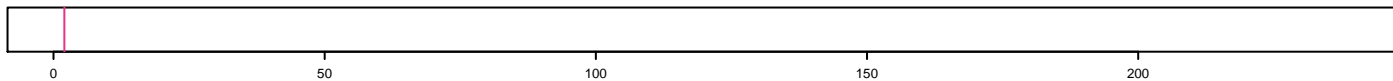

# Arginyl-tRNA--protein transferase 1 (F5GXE4)

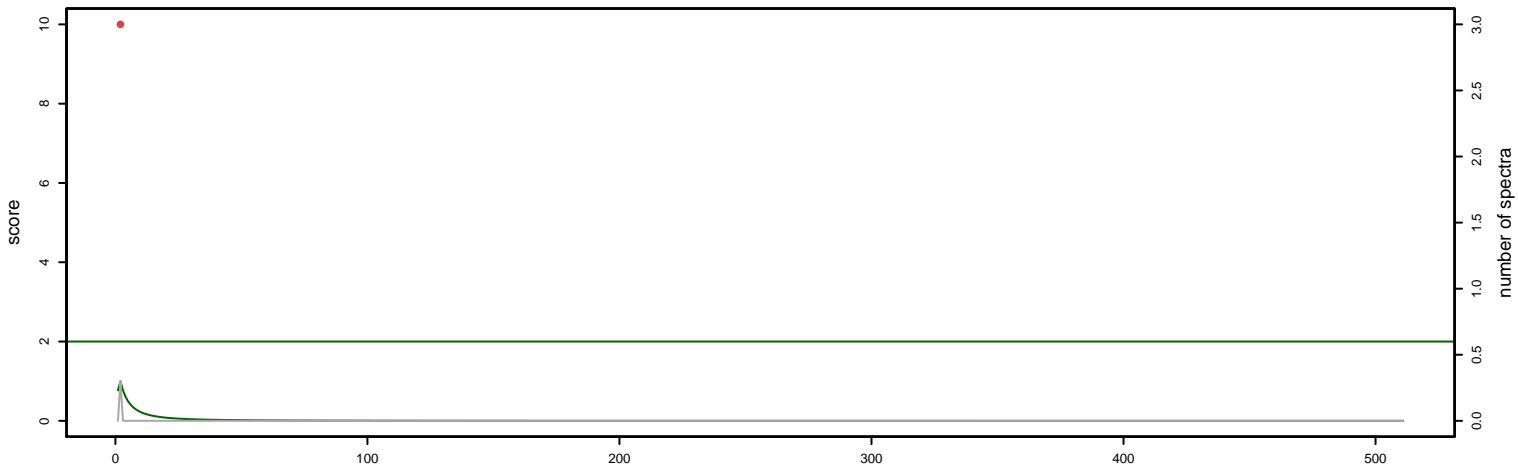

replica

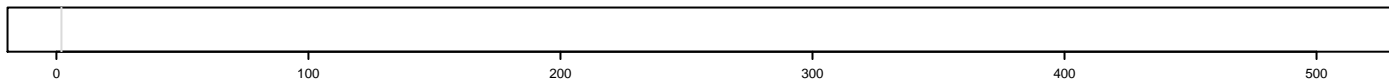

stability

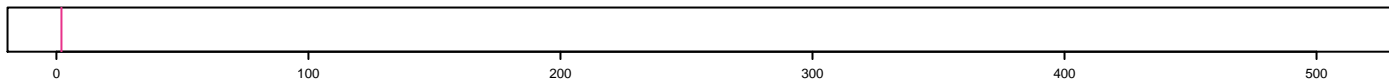

# Peptidyl-prolyl cis-trans isomerase A-like 4D (F5H284)

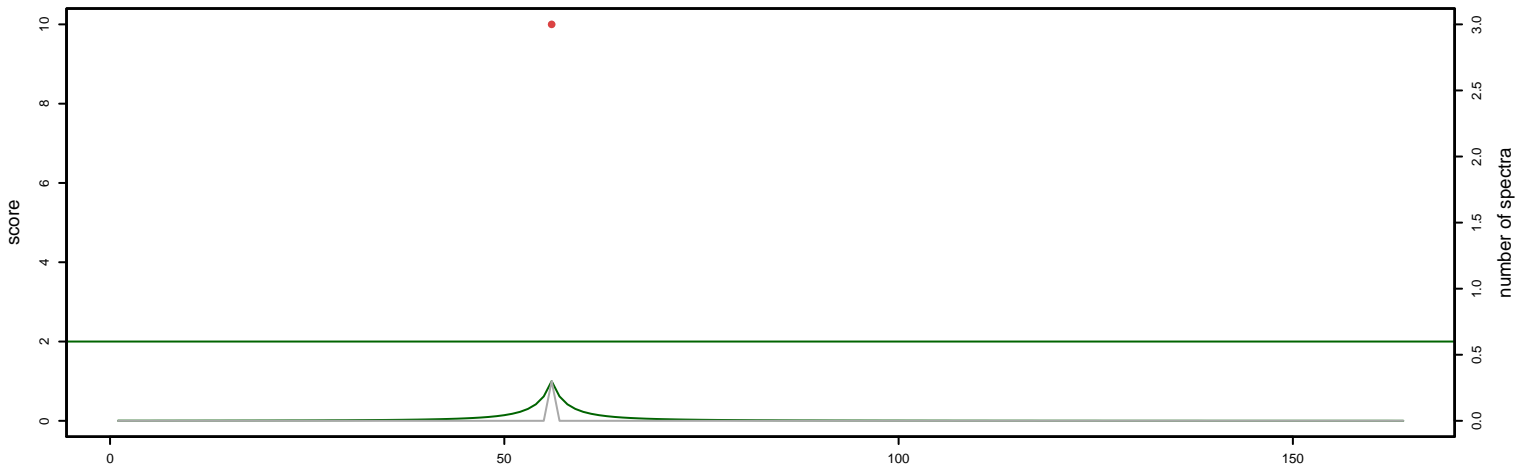

replica

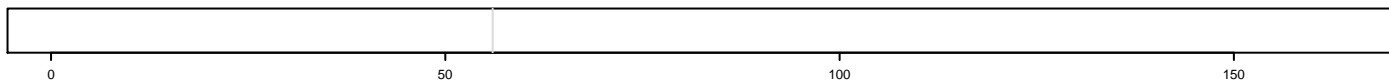

stability

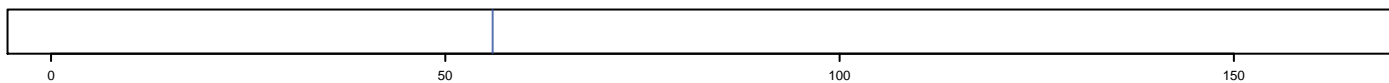

# UV excision repair protein RAD23 homolog A (K7EQ16)

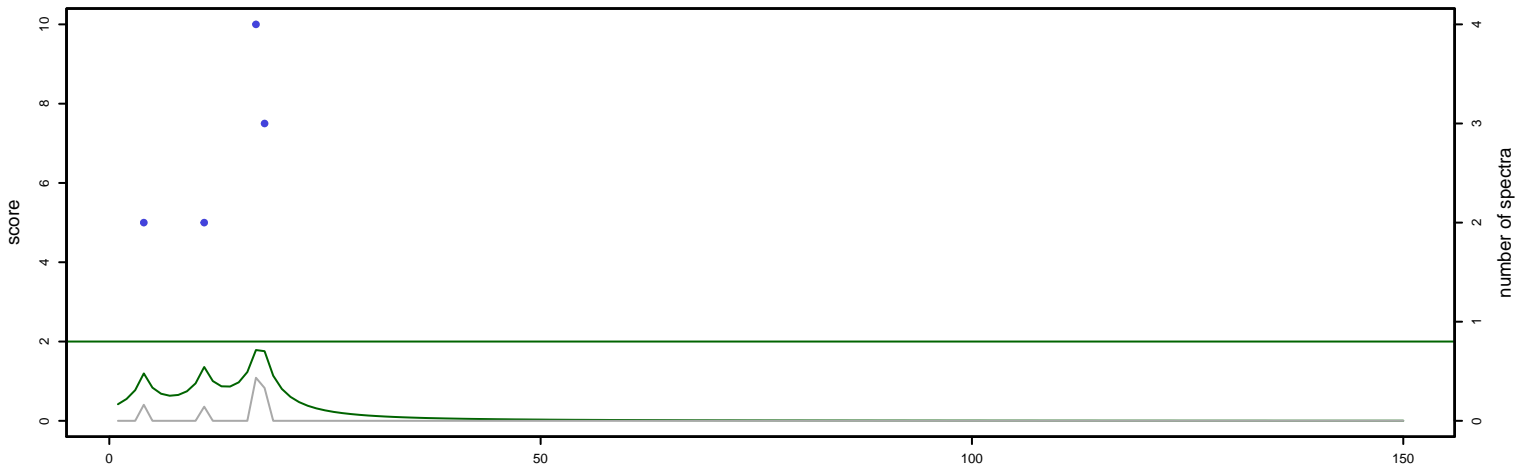

replica

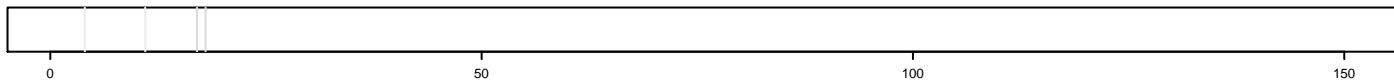

stability

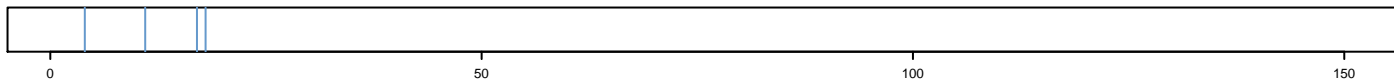

# Protein unc-13 homolog D (K7EQ37)

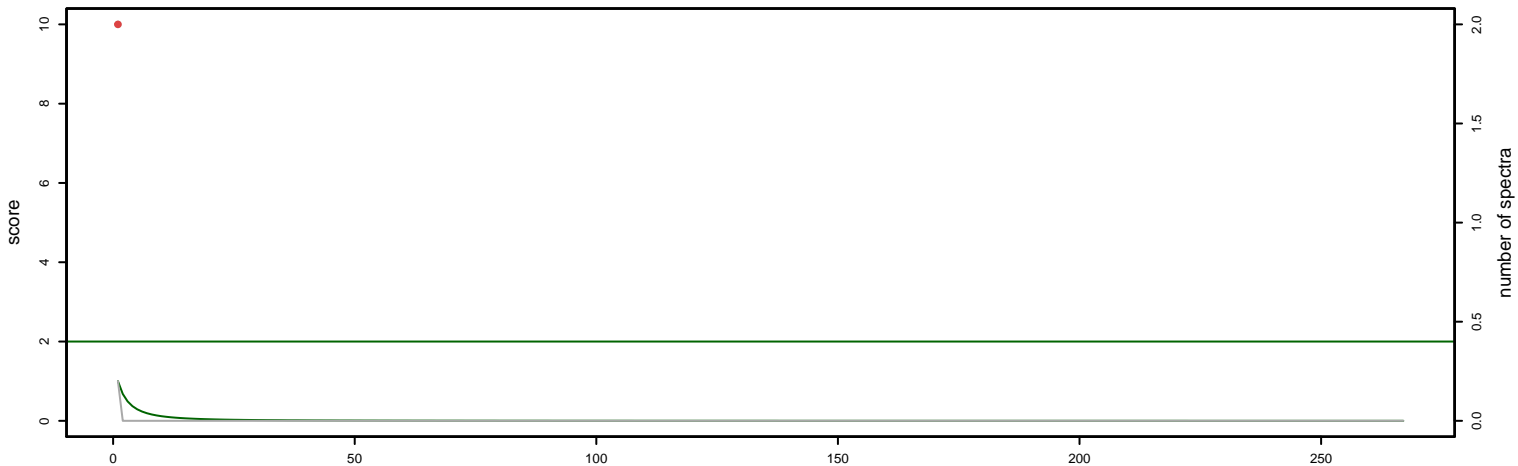

replica

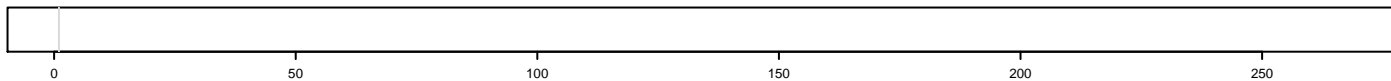

stability

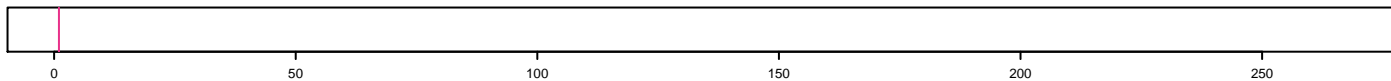

### Cytosolic acyl coenzyme A thioester hydrolase (O00154-2)

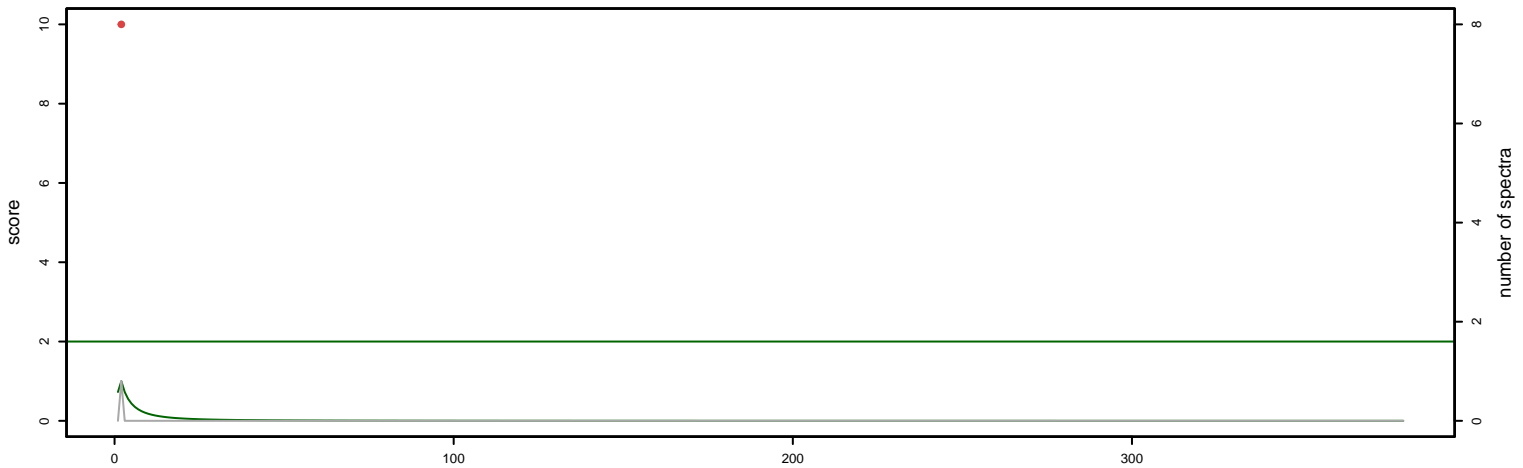

replica

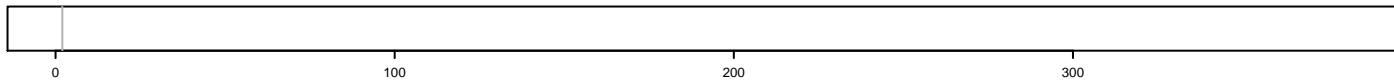

stability

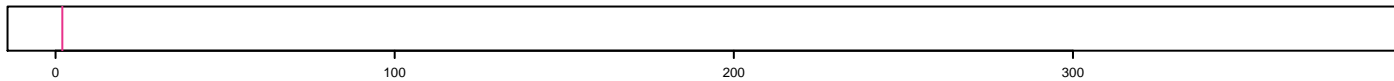



# Unconventional myosin-Ic (O00159)

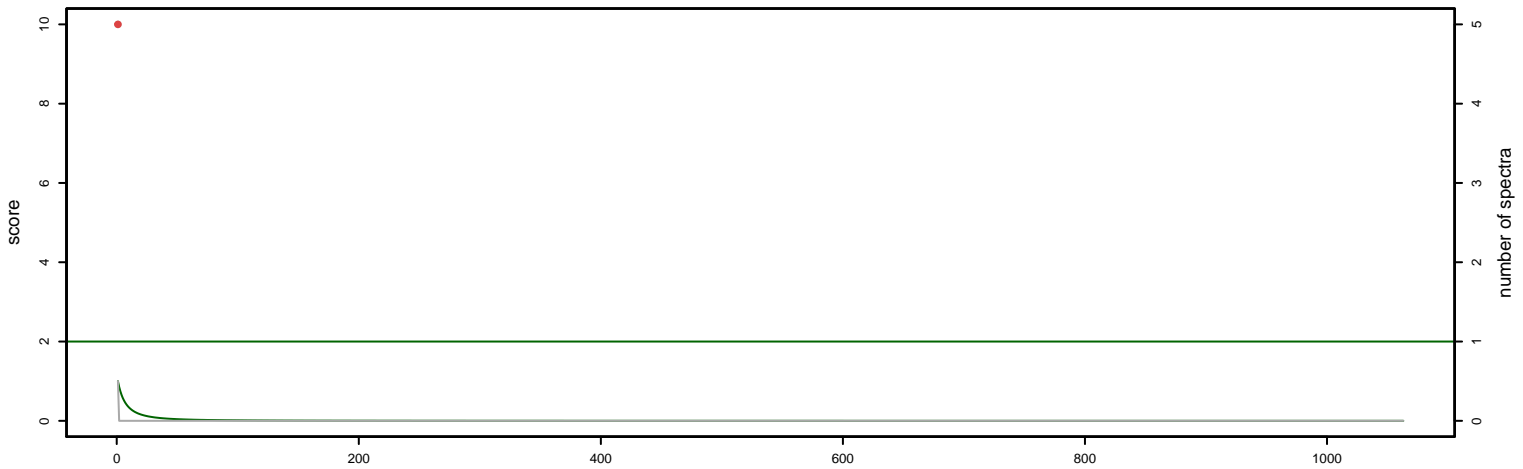

replica

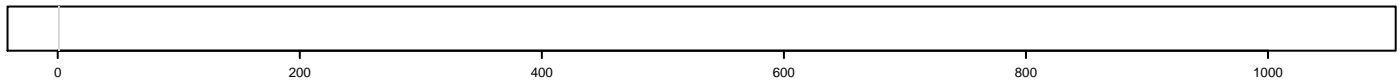

stability

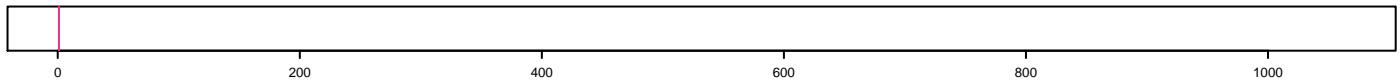

### Synaptosomal-associated protein 23 (O00161)

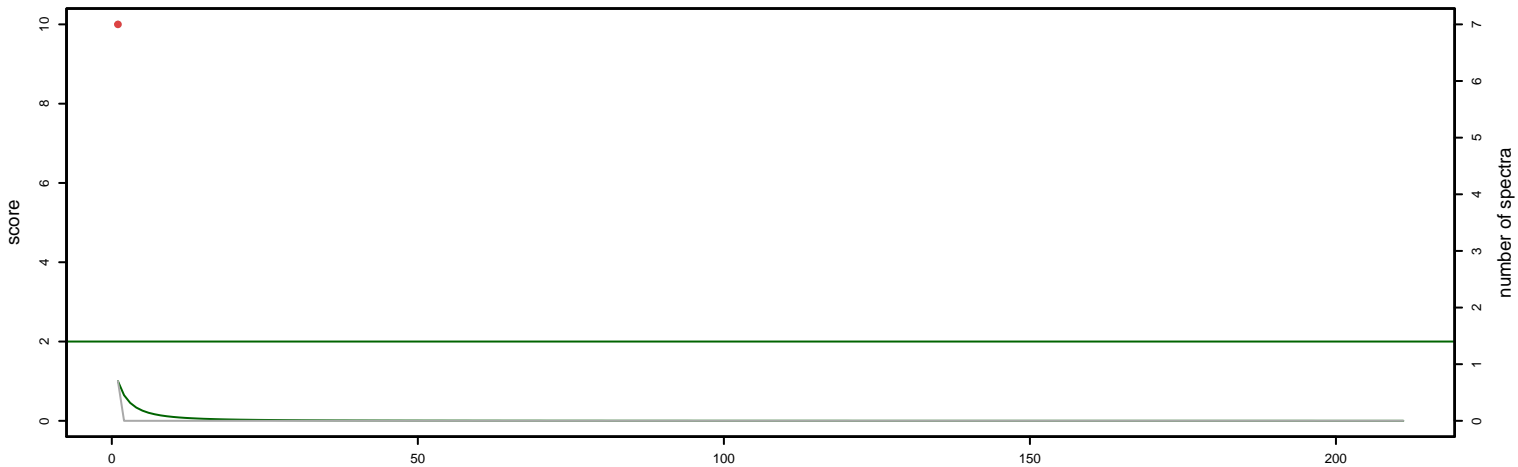

replica

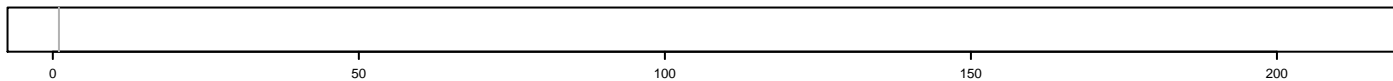

stability

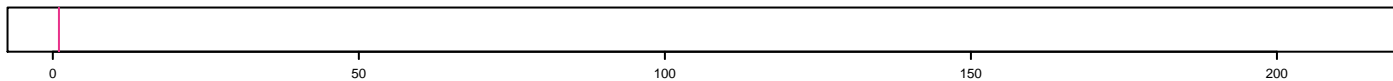

# 26S proteasome non-ATPase regulatory subunit 11 (O00231)

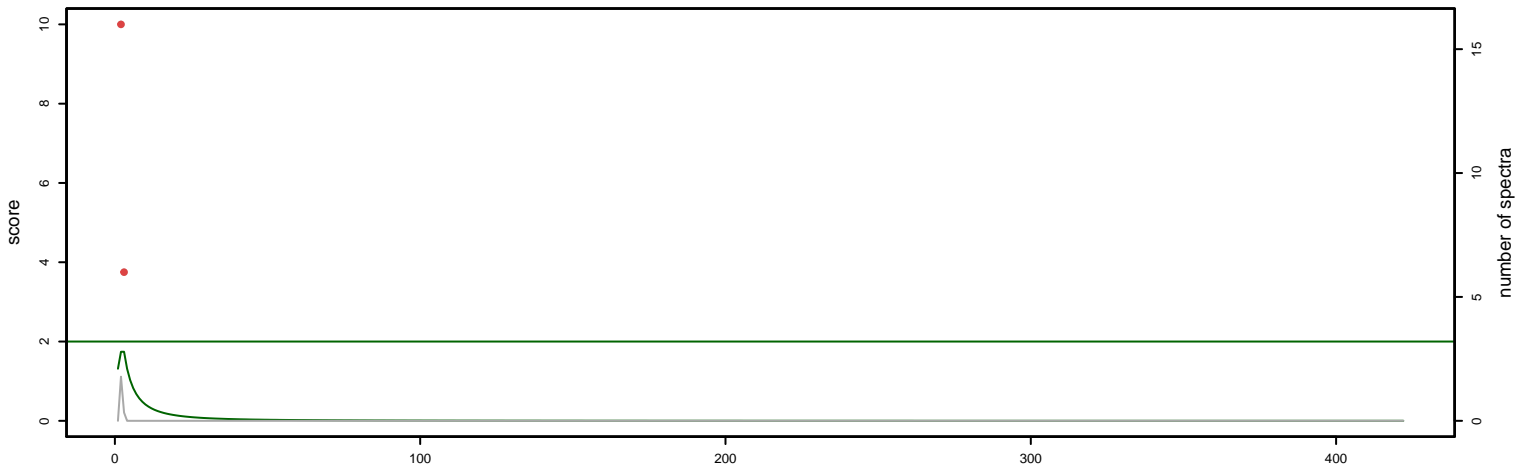

replica

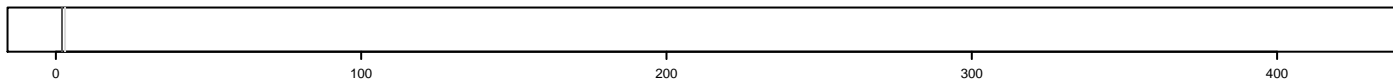

stability

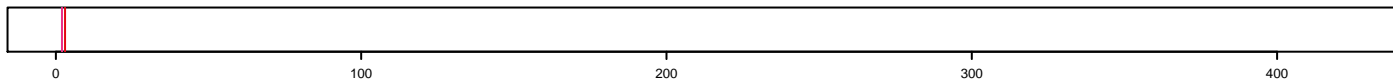

### 26S proteasome non-ATPase regulatory subunit 9 (O00233)

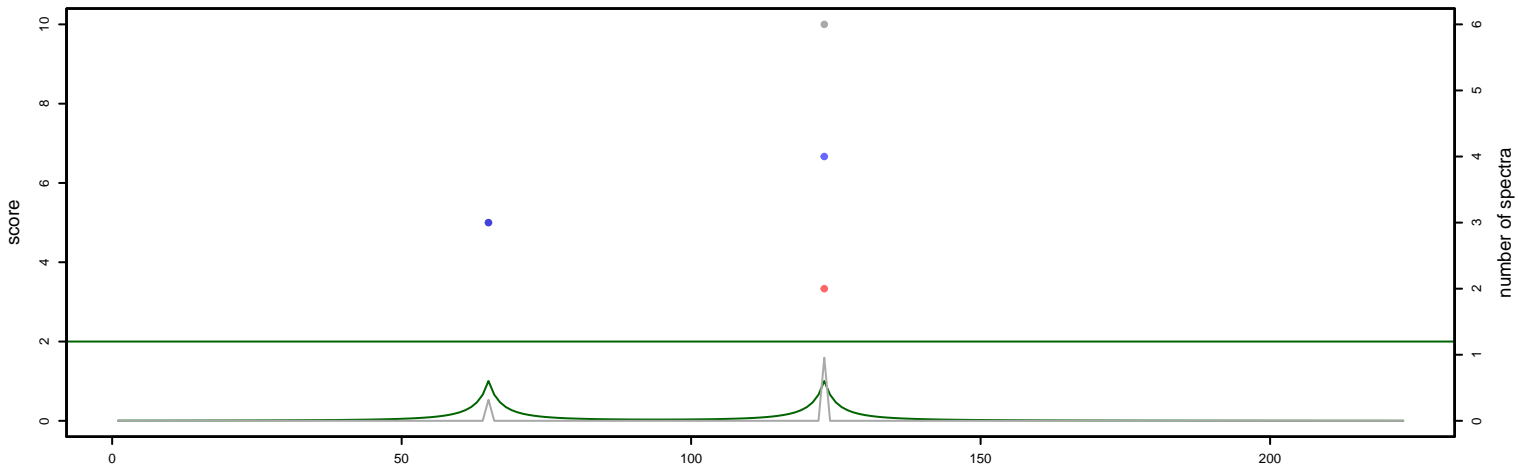

replica

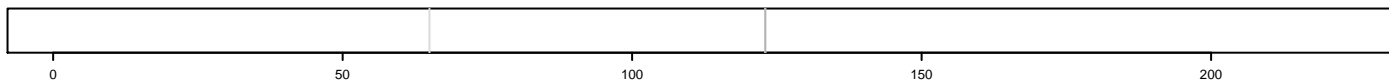

stability

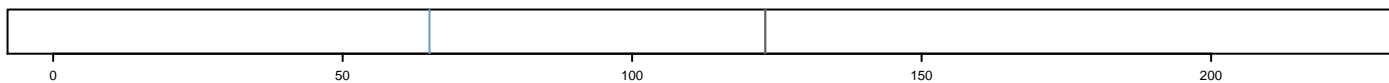

# Chloride intracellular channel protein 1 (O00299)

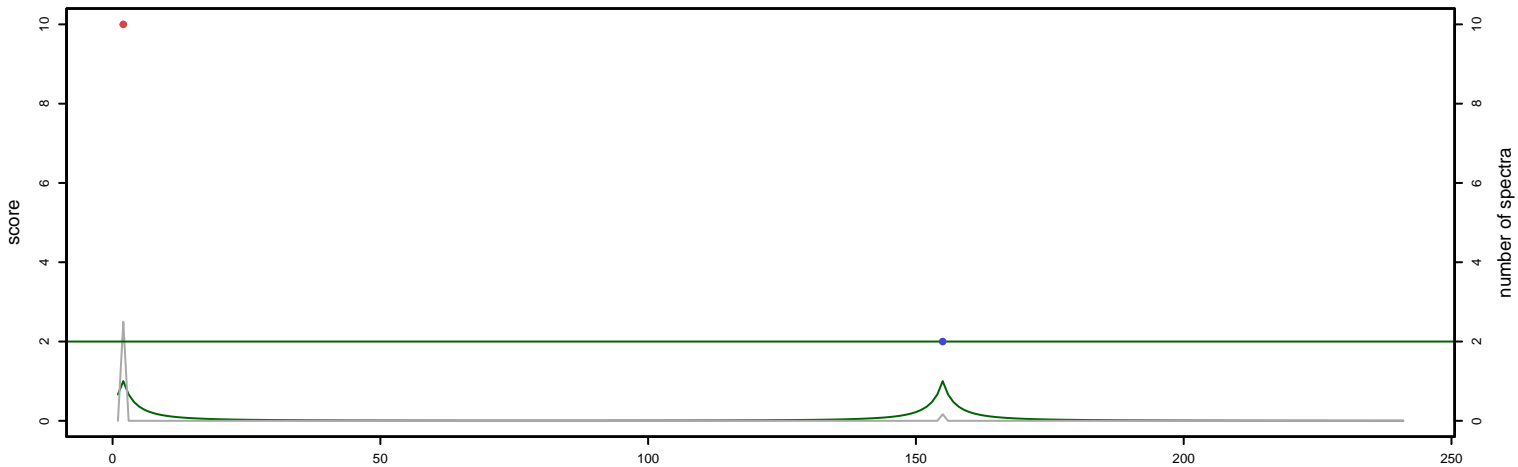

replica

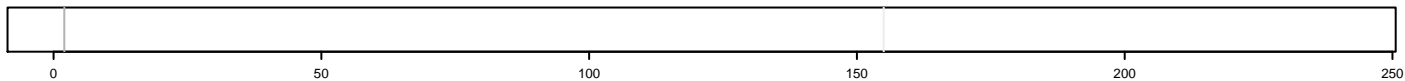

stability

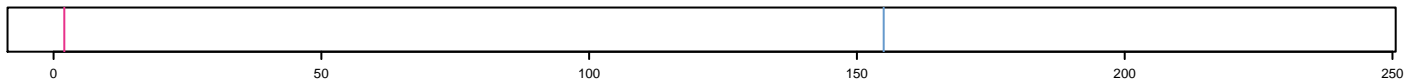

# Importin subunit alpha-3 (O00505)

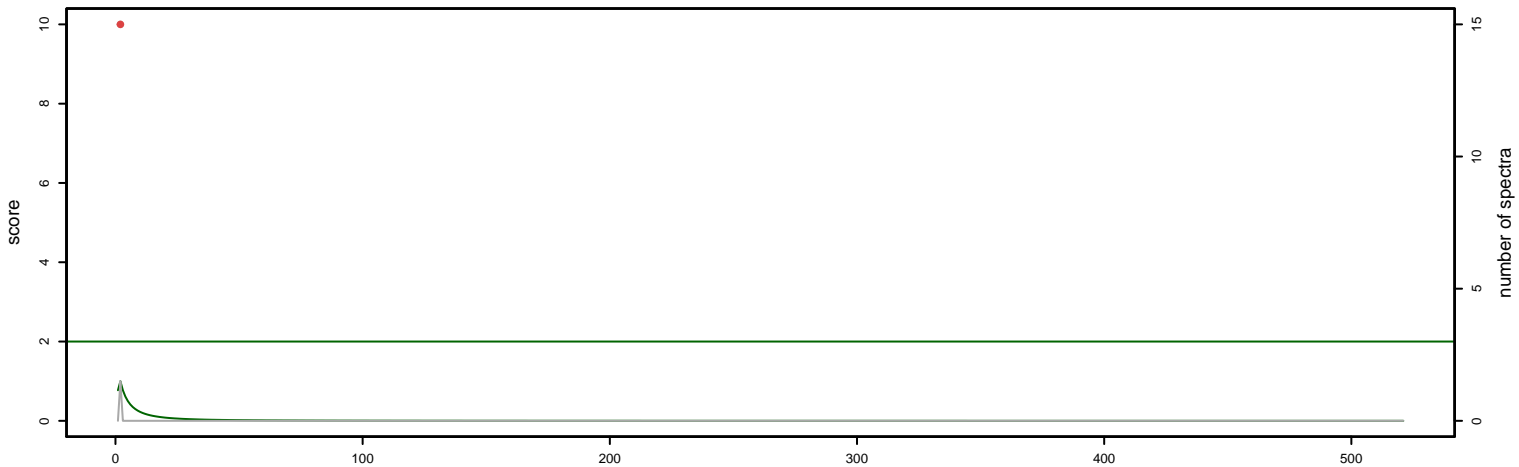

replica

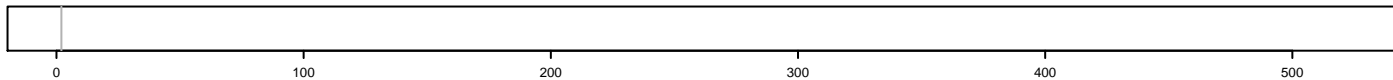

stability

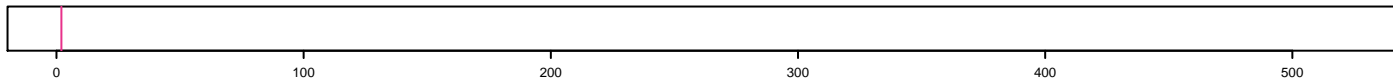

# Importin subunit alpha-4 (O00629)

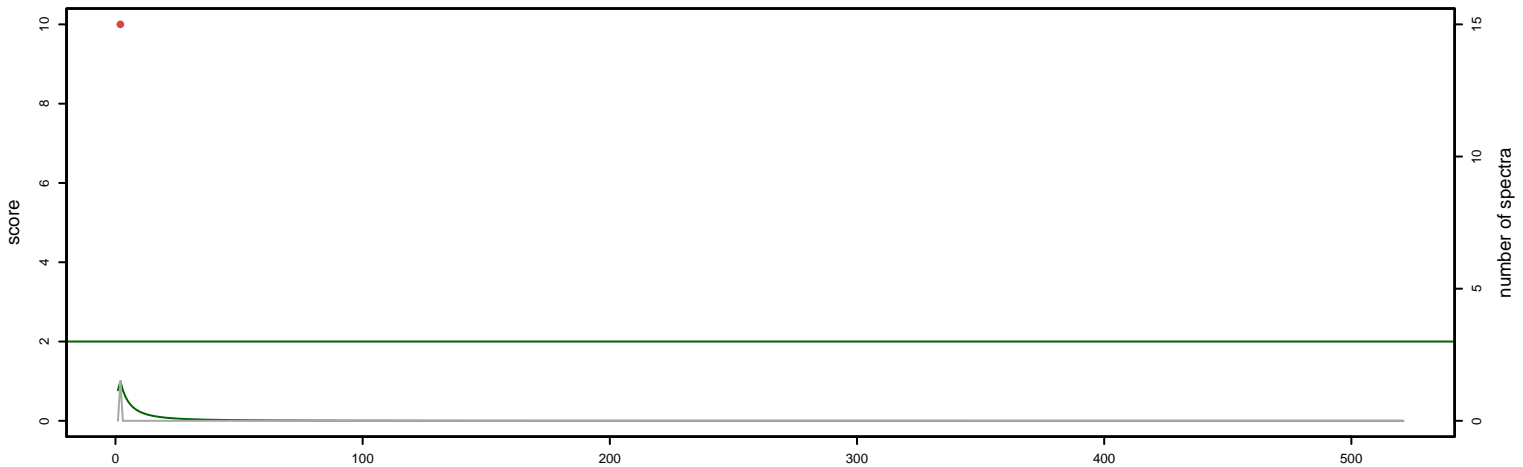

replica

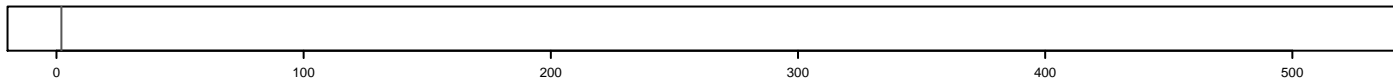

stability



### Serine/threonine-protein phosphatase 6 catalytic subunit (O00743)

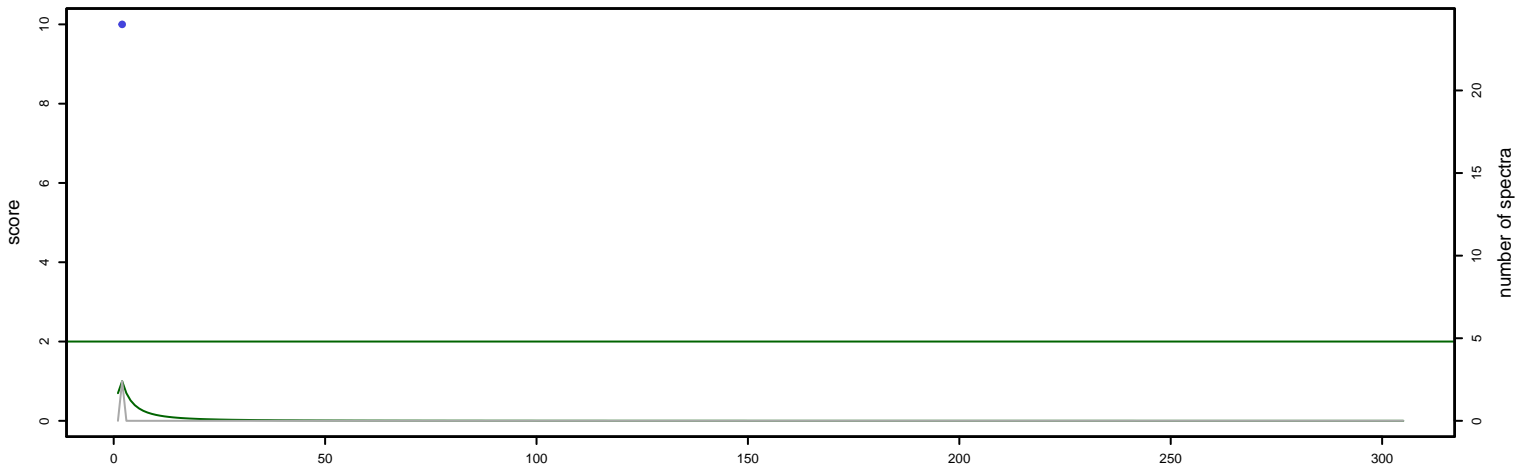

replica

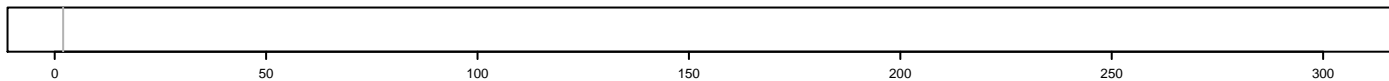

stability

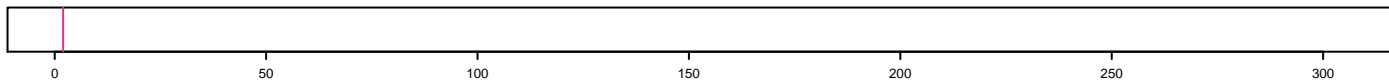



# Copper chaperone for superoxide dismutase (O14618)

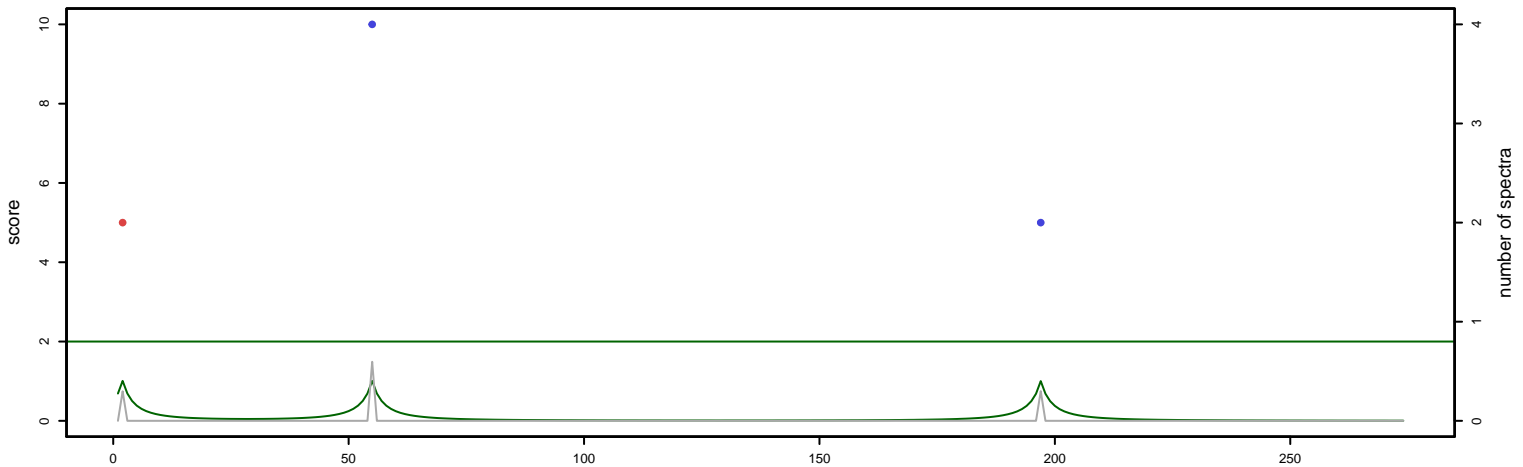

replica

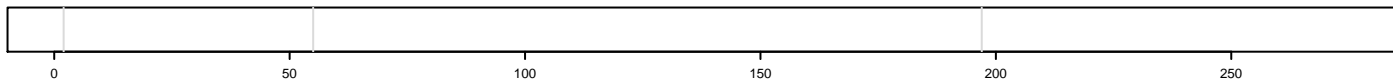

stability

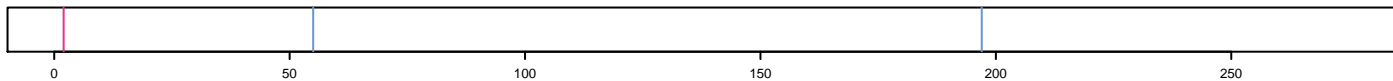

# Protein arginine N-methyltransferase 5 (O14744)

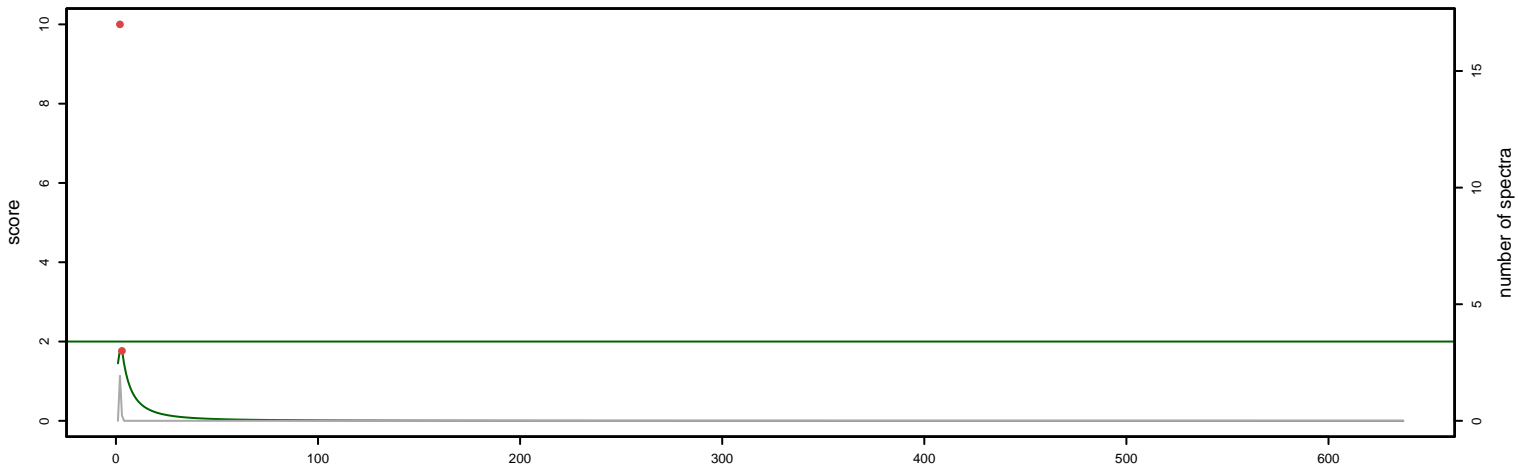

replica

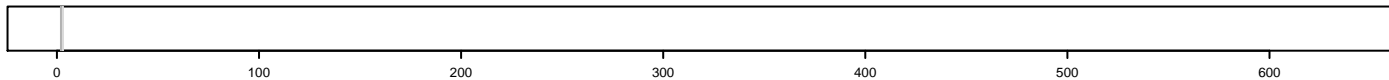

stability

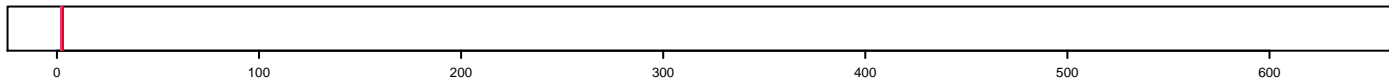

# Proteasome subunit alpha type-7 (O14818)

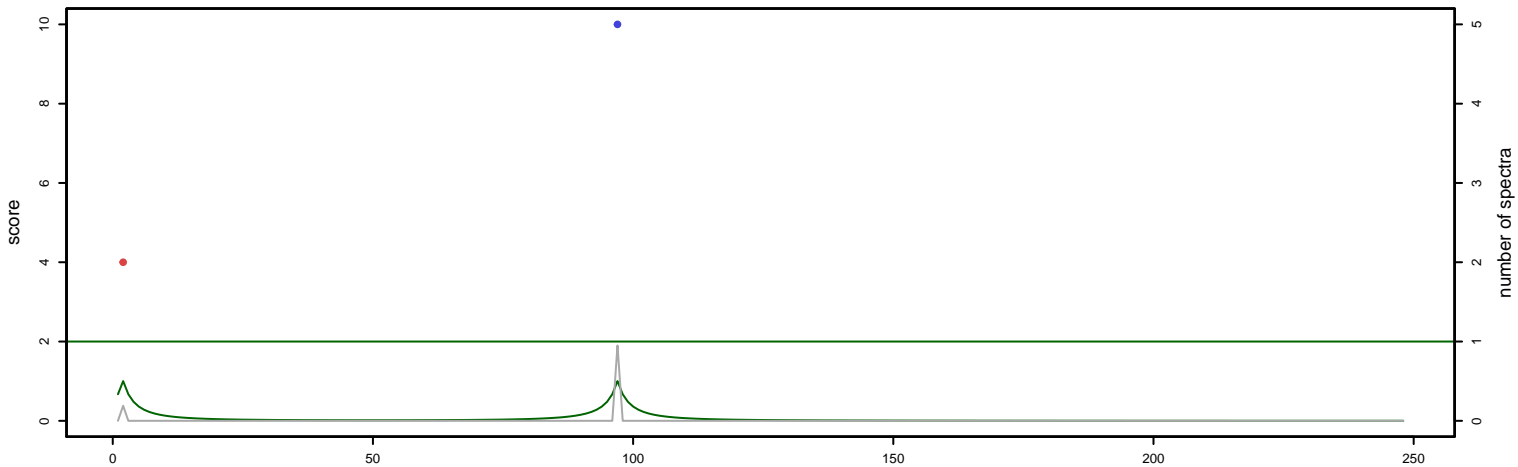

replica

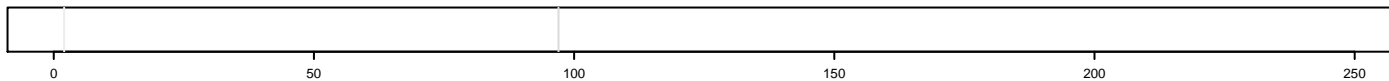

stability

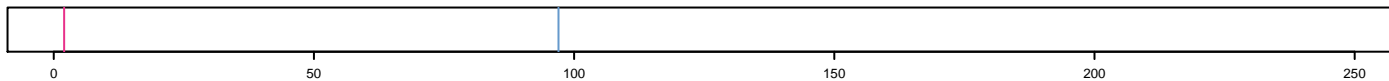

# Exportin-1 (O14980)

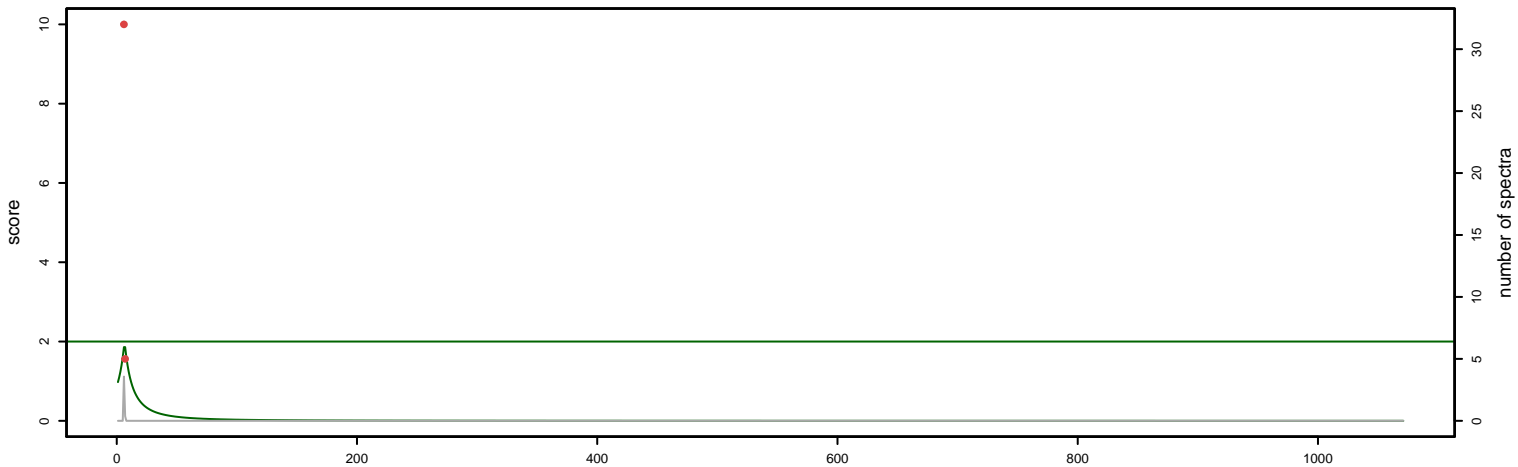

replica

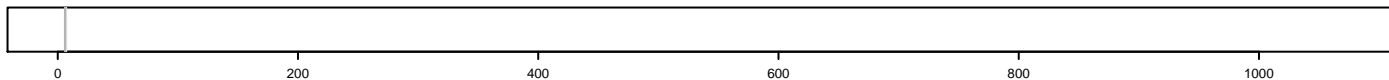

stability

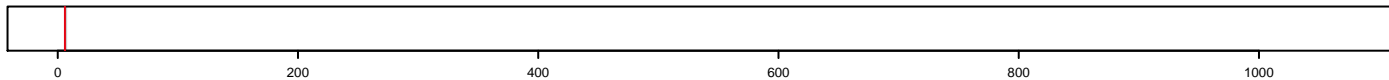

# Phospholipid scramblase 1 (O15162)

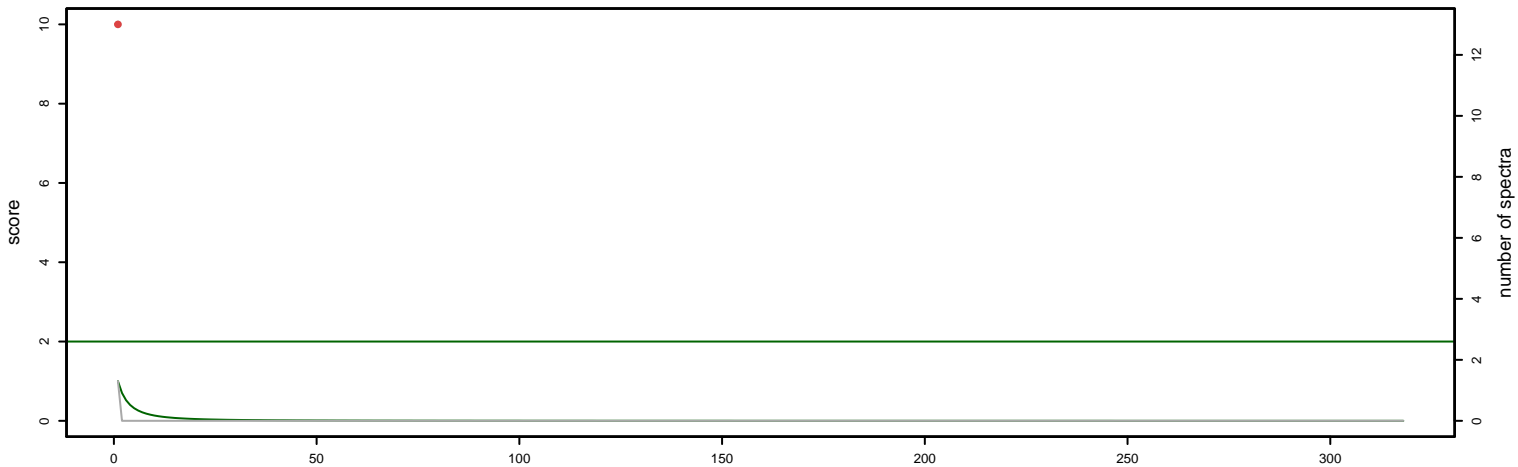

replica

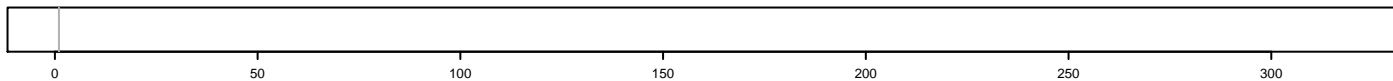

stability

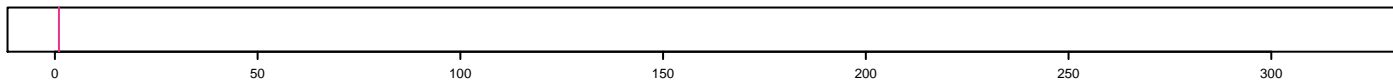

# Protein RER1 (O15258)

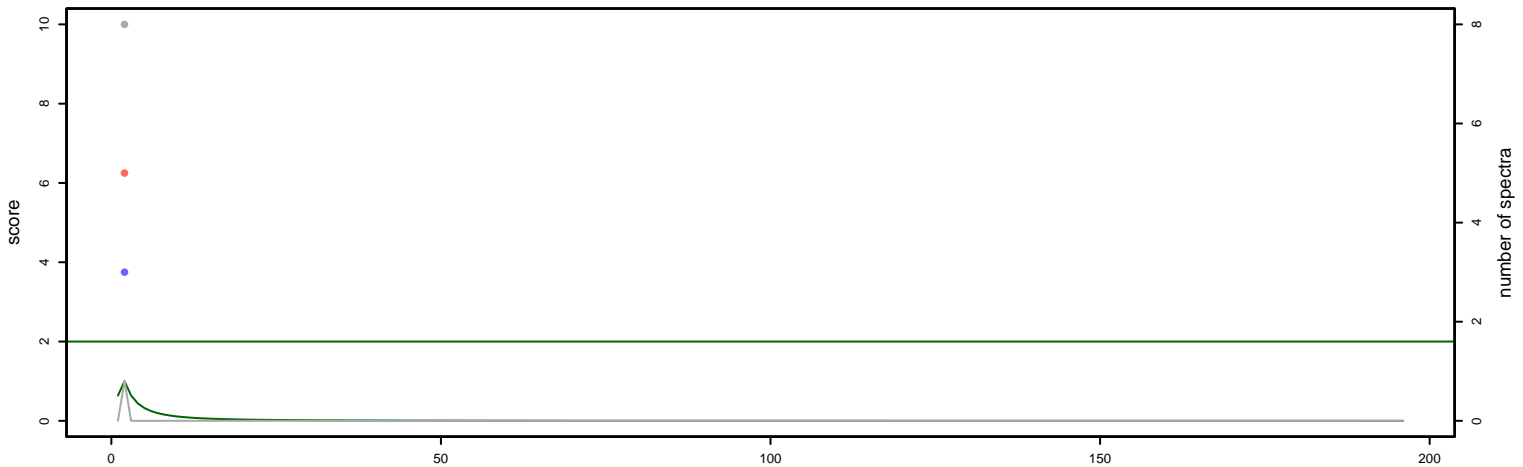

replica

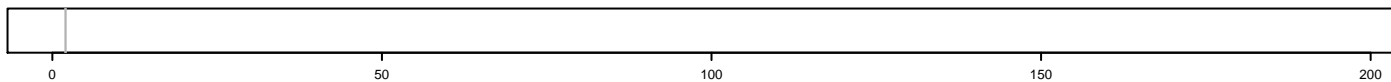

stability

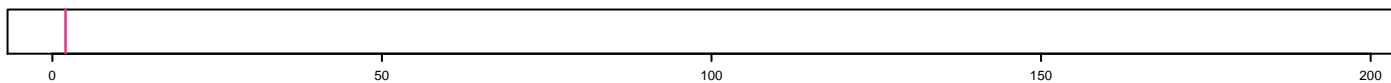

### Surfeit locus protein 4 (O15260)

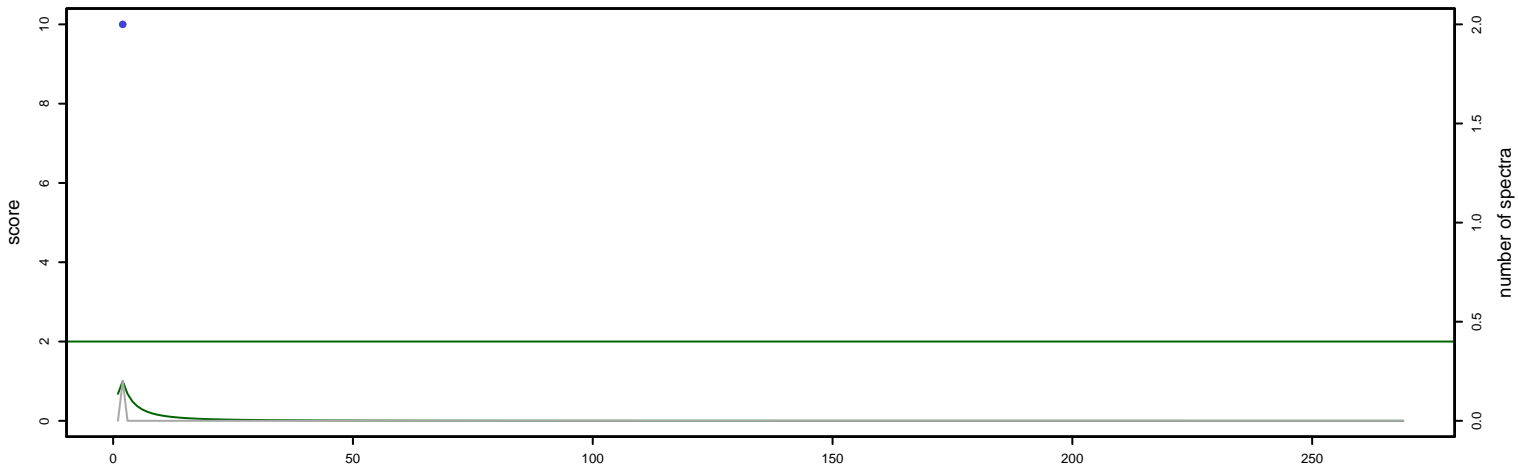

replica

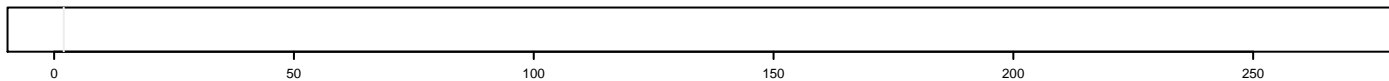

stability

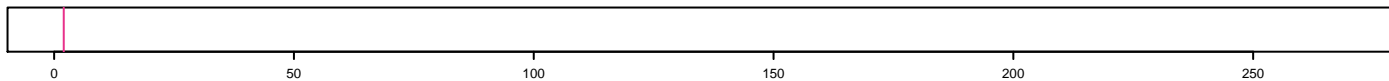

UDP-N-acetylglucosamine--peptide N-acetylglucosaminyltransferase 110 kDa subunit (O15294)

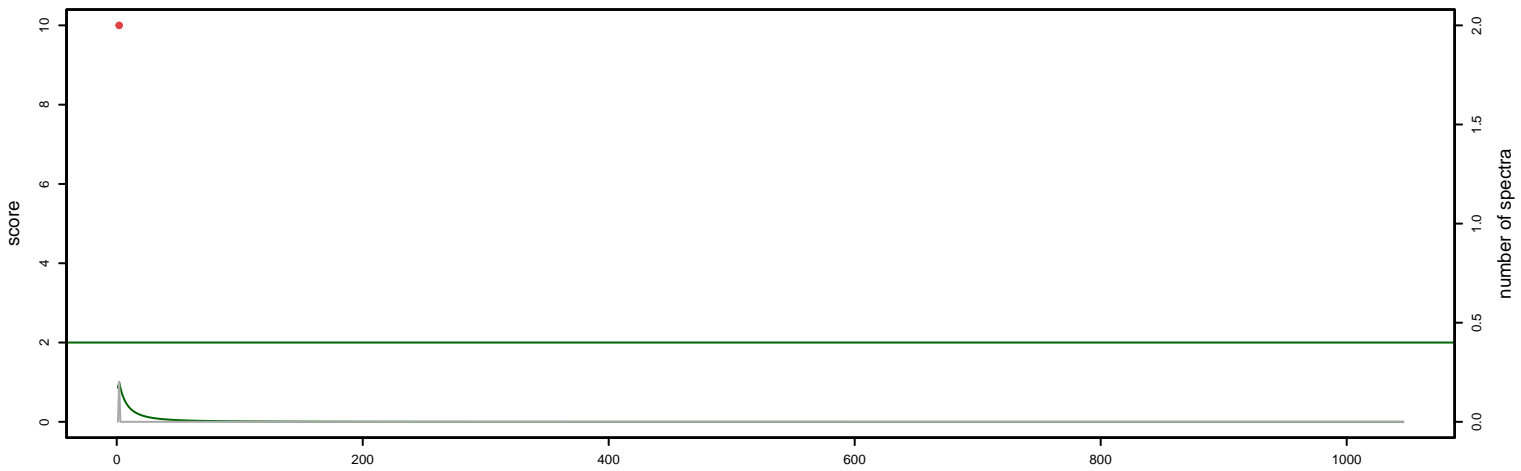

replica

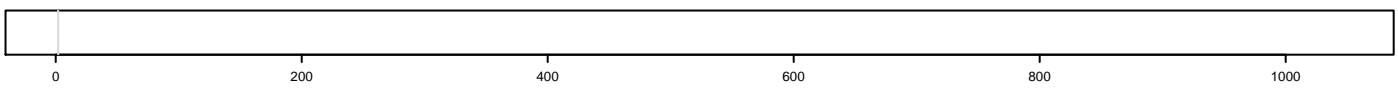

stability

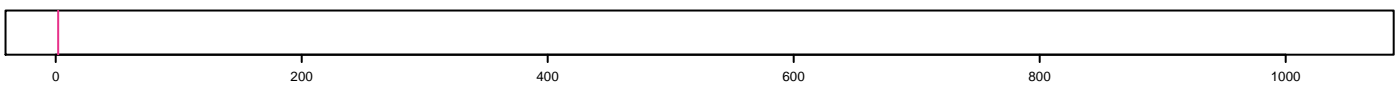



UDP-N-acetylglucosamine--peptide N-acetylglucosaminyltransferase 110 kDa subunit (O15294-3)

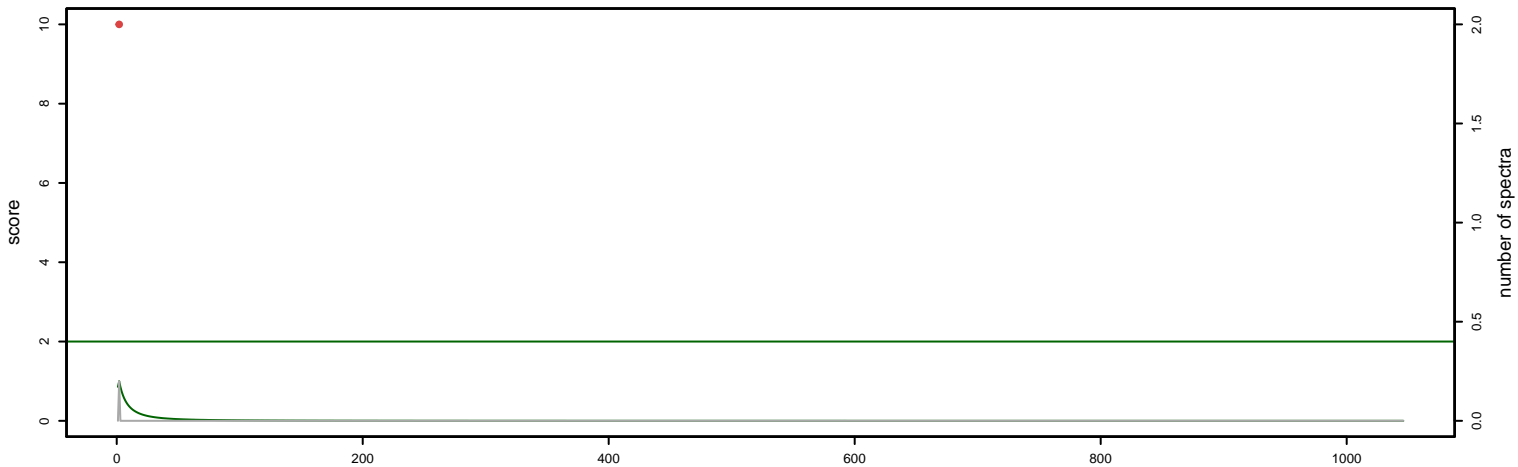

replica

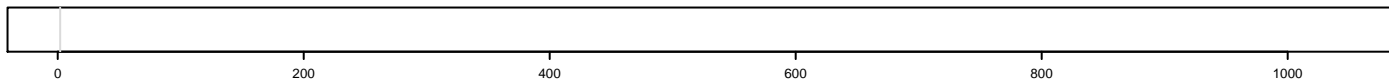

stability

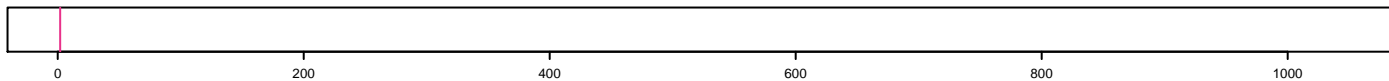

# Syntaxin-7 (O15400)

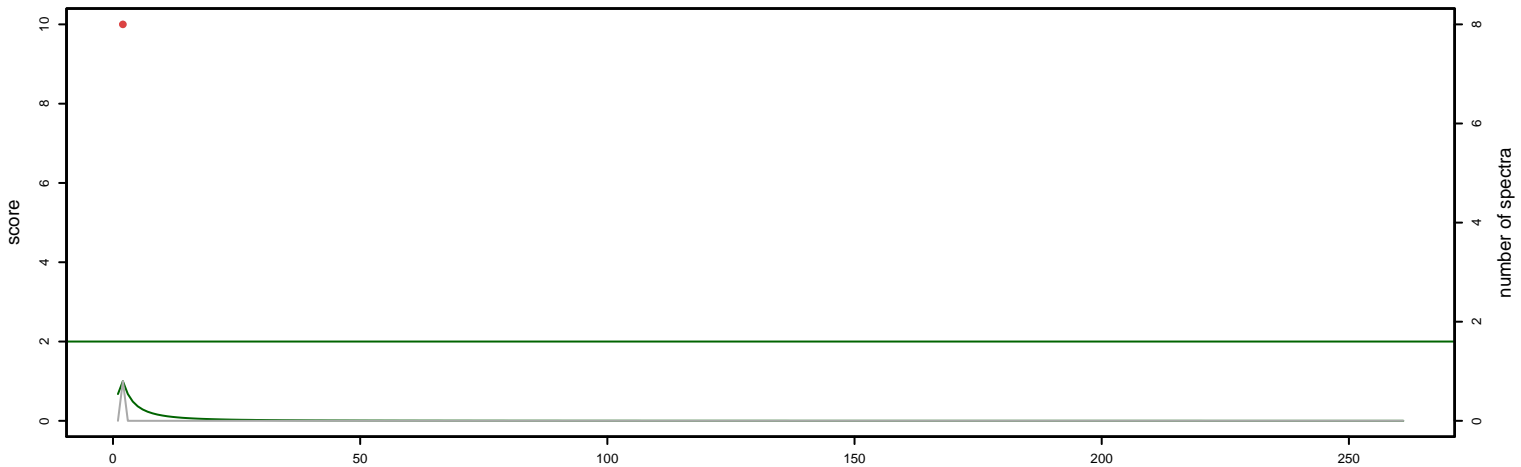

## replica

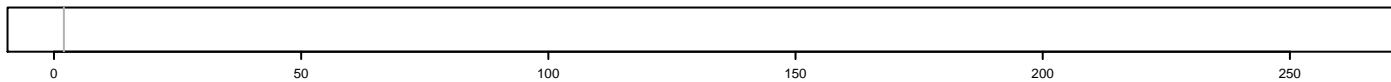

## stability

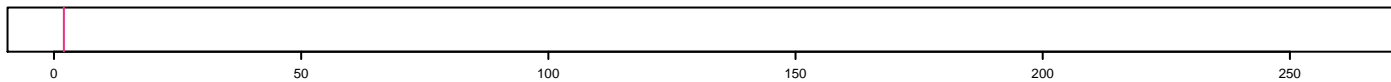

# Putative PIN1-like protein (O15428)

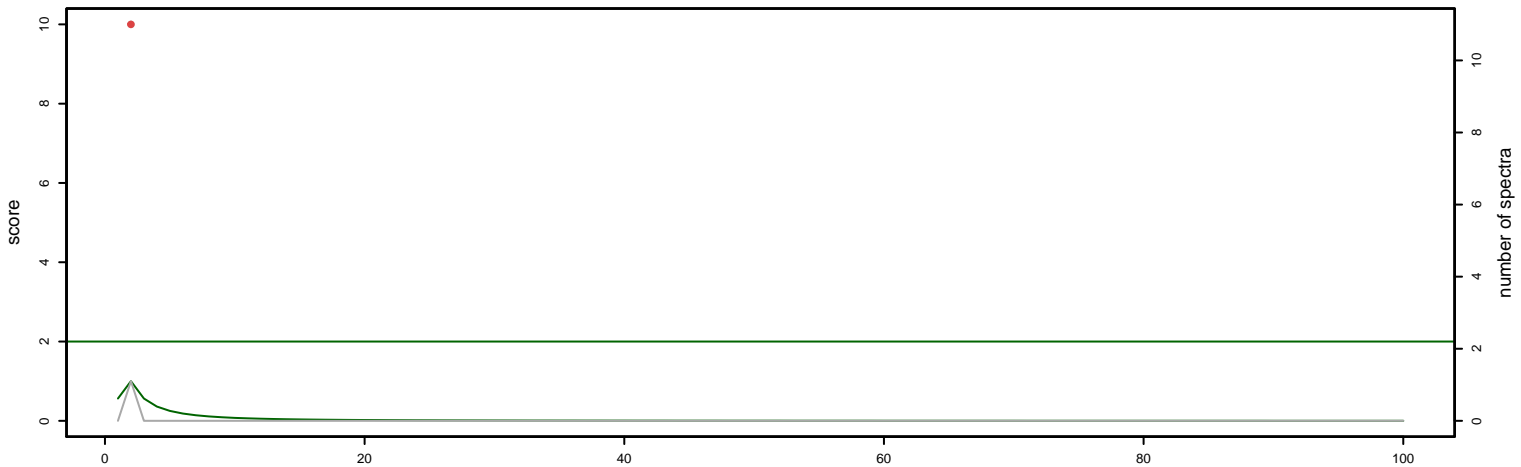

replica

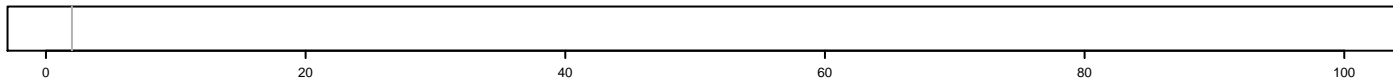

stability

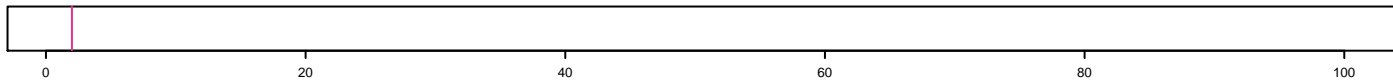

# Intermediate conductance calcium-activated potassium channel protein 4 (O15554)

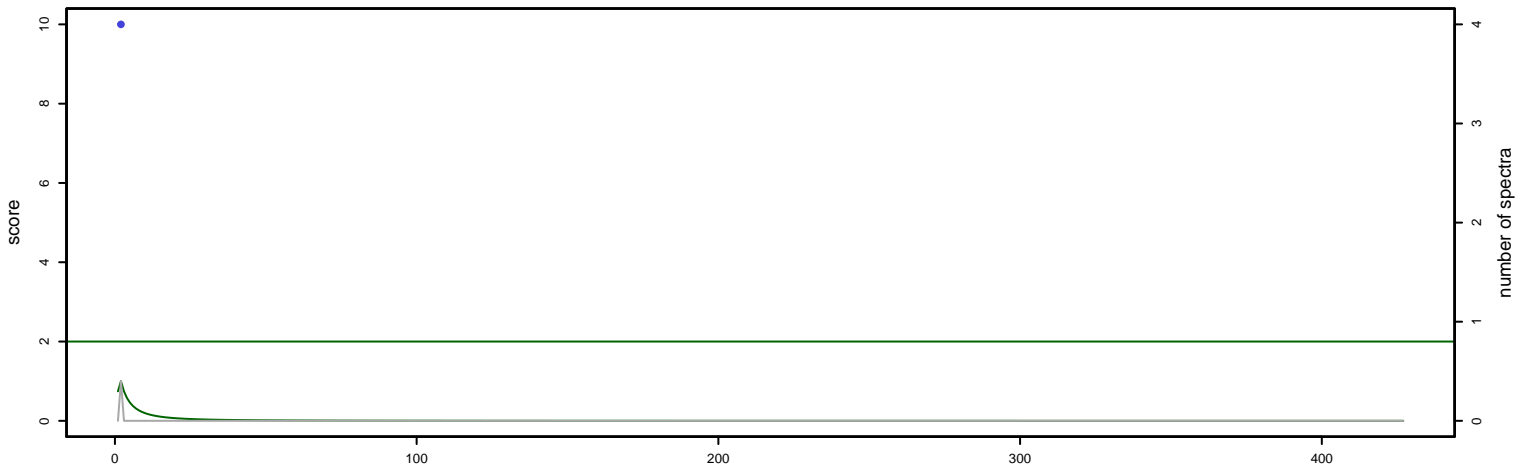

replica

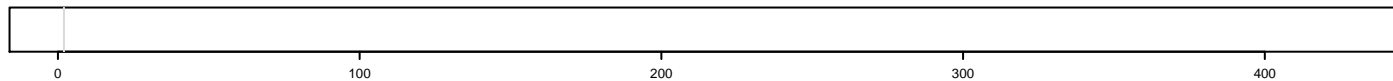

stability

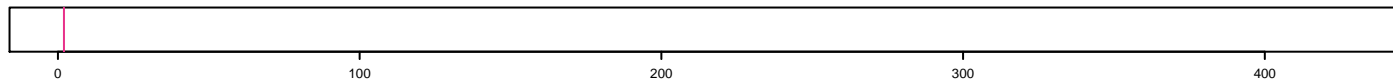

### 26S proteasome non-ATPase regulatory subunit 3 (O43242)

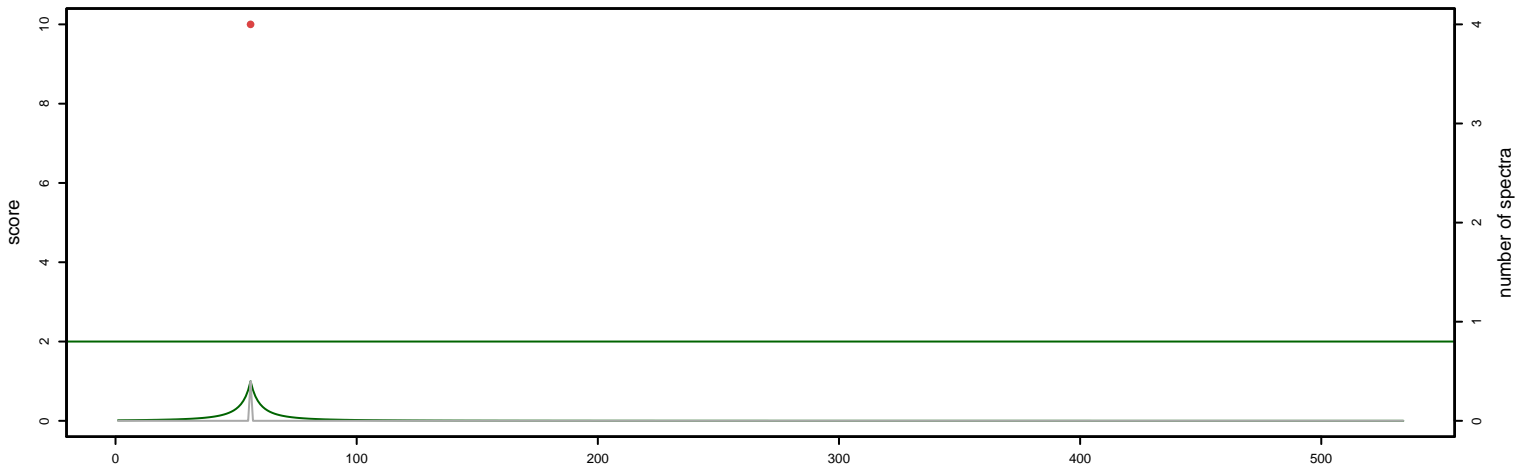

replica

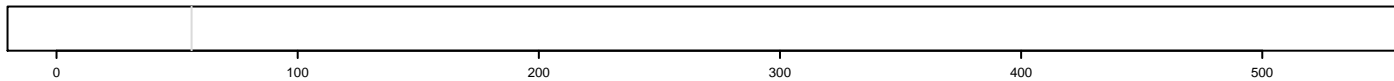

stability

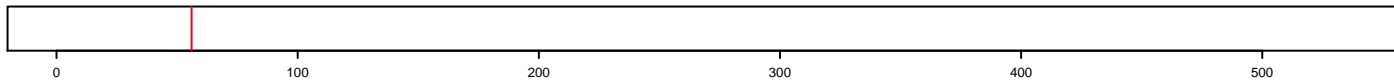

# Centromere/kinetochore protein zw10 homolog (O43264)

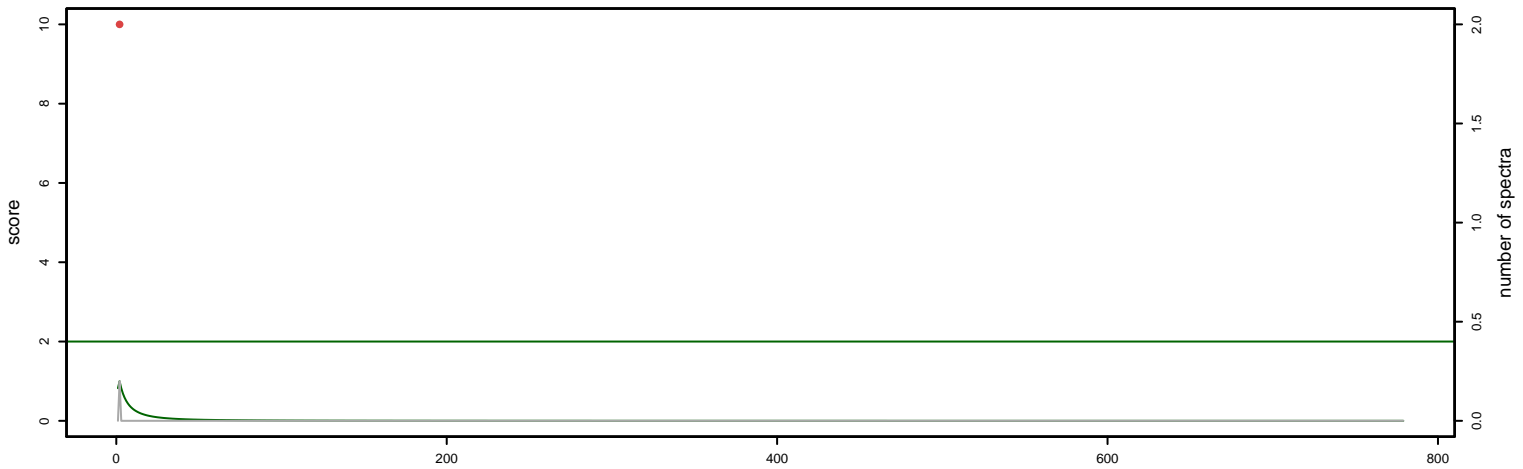

replica

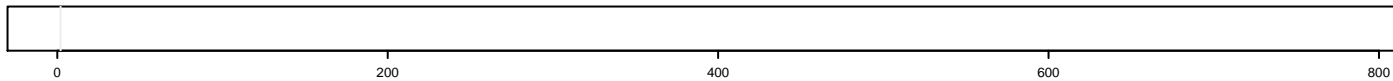

stability

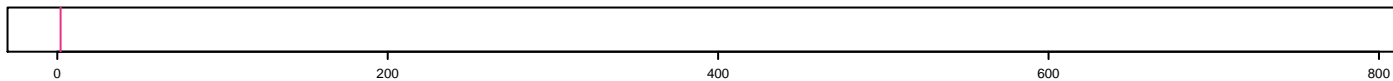

# Thioredoxin-like protein 1 (O43396)

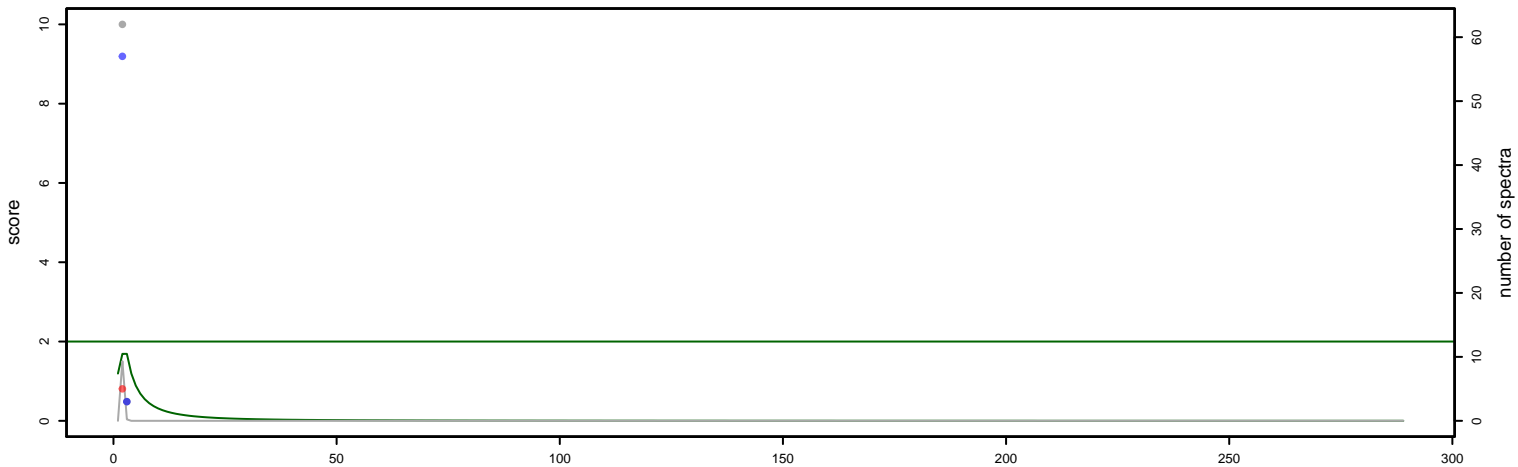

replica

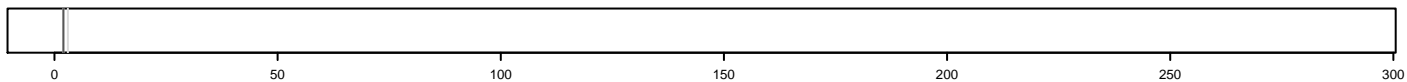

stability

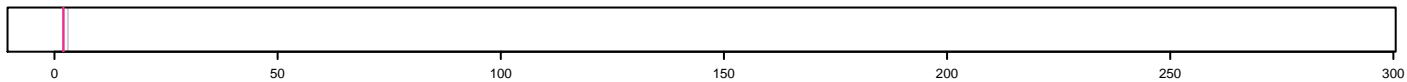

# Aflatoxin B1 aldehyde reductase member 2 (O43488)

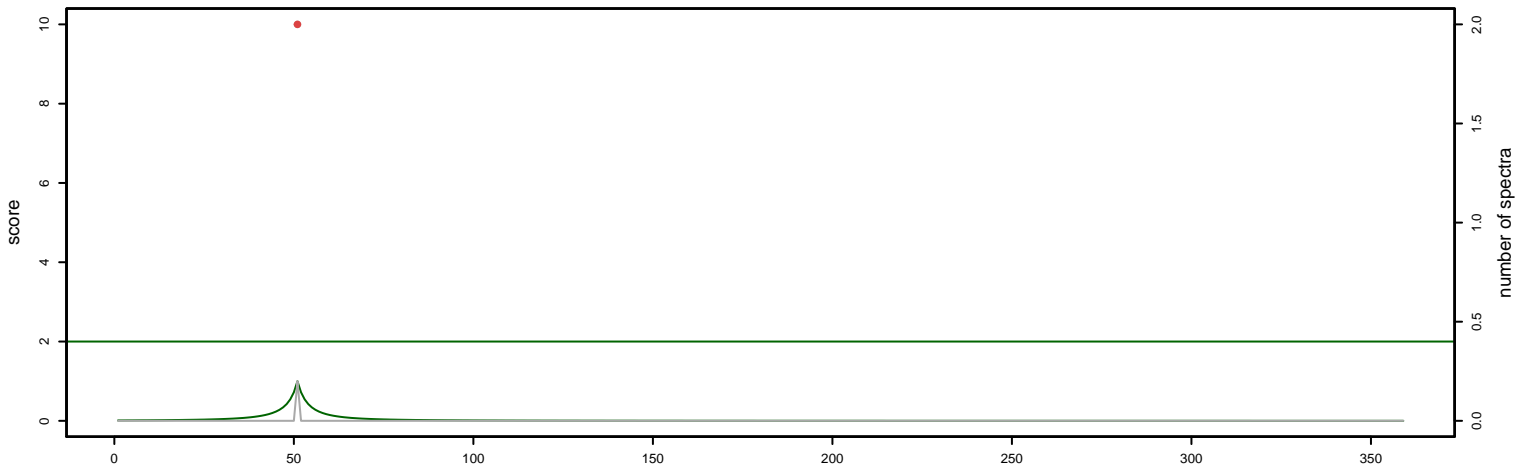

replica

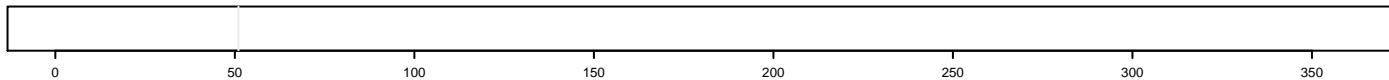

stability

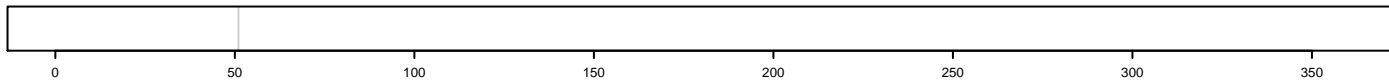



# Density-regulated protein (O43583)

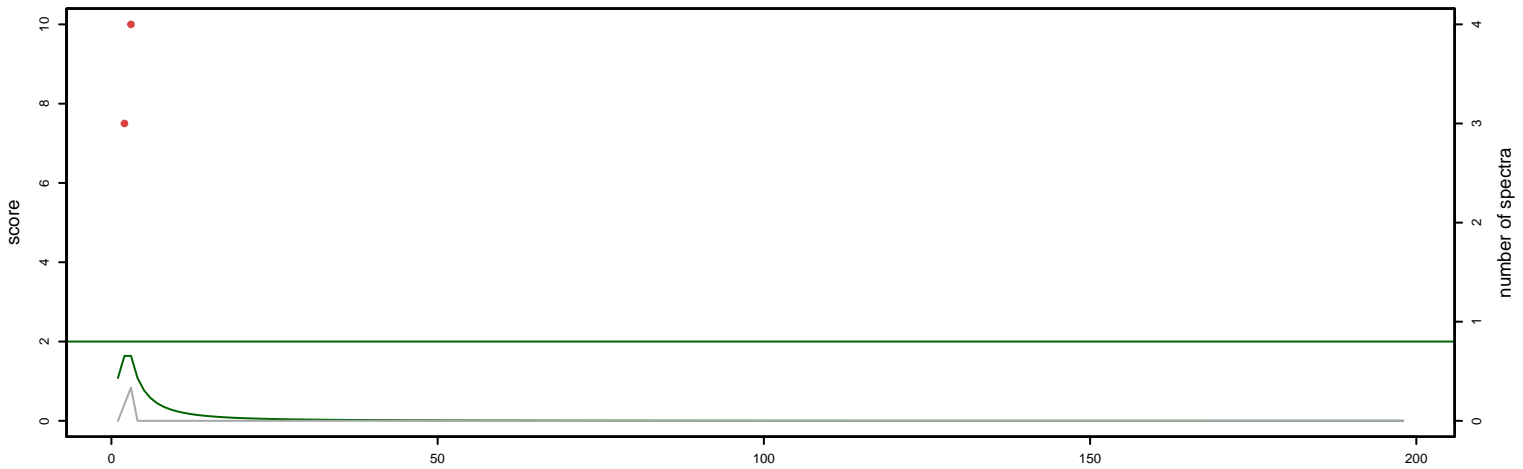

replica

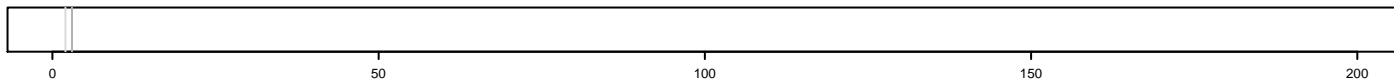

stability

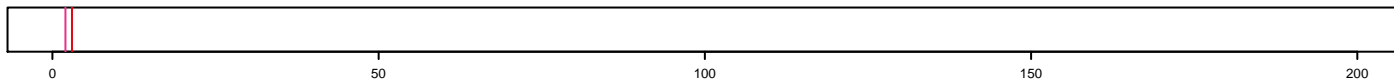

### Exportin-T (O43592)

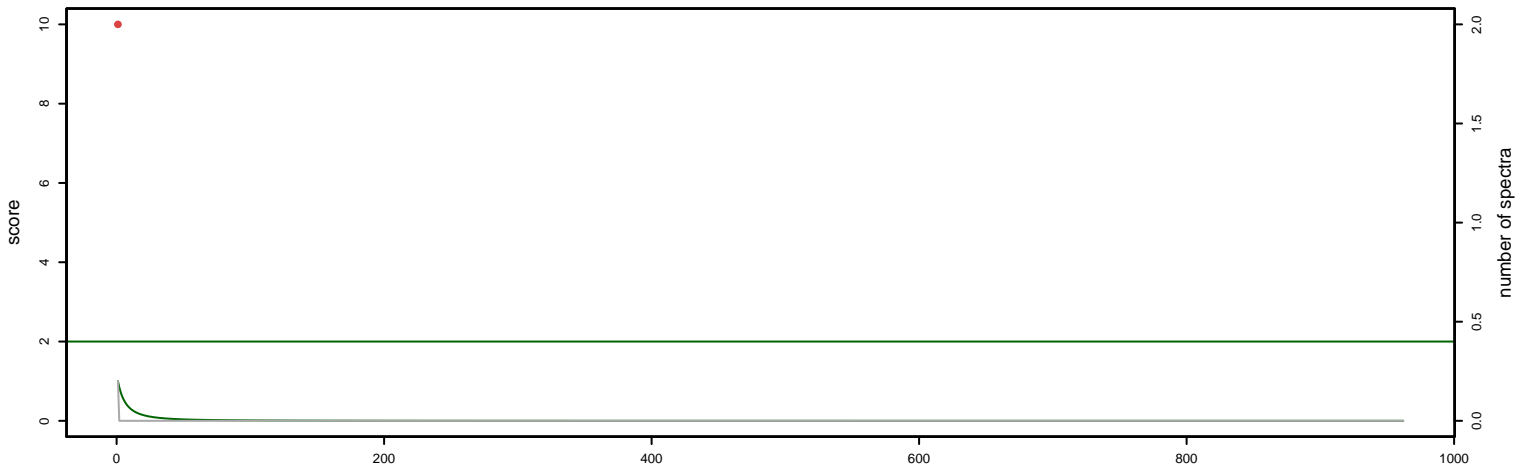

replica

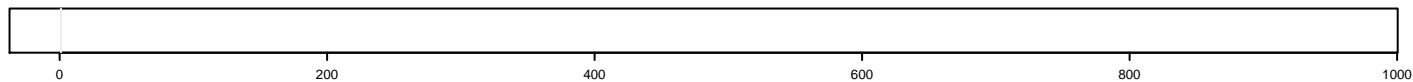

stability

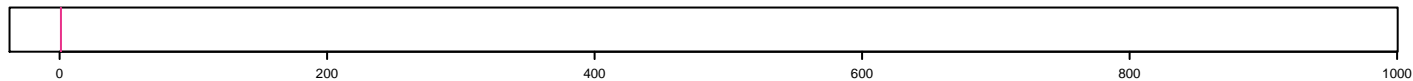

# 2-deoxynucleoside 5-phosphate N-hydrolase 1 (O43598)

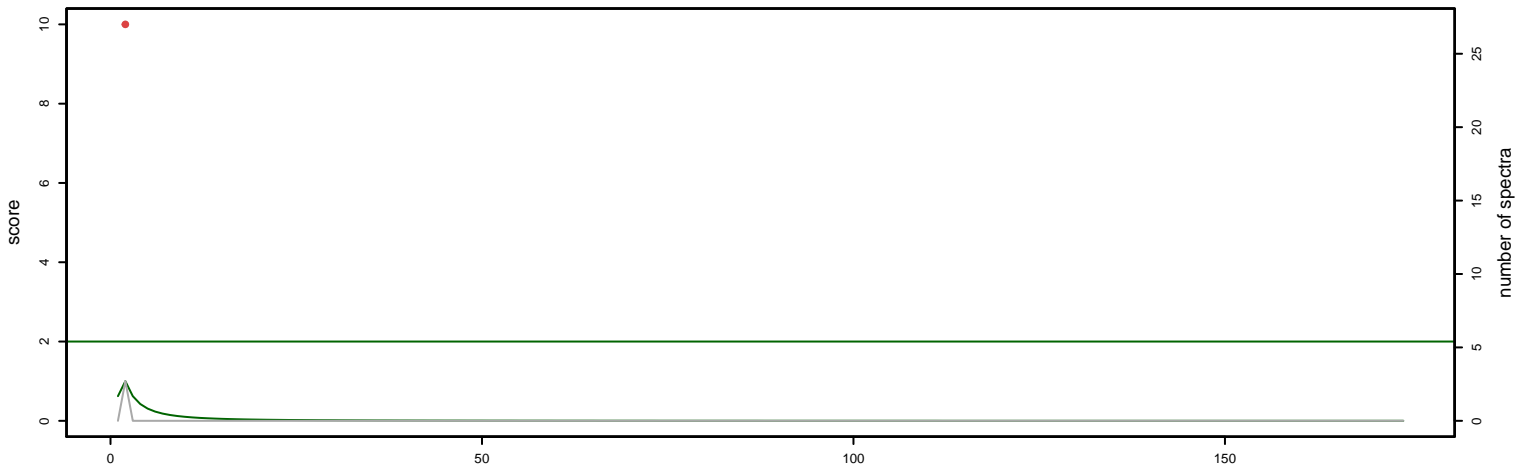

replica

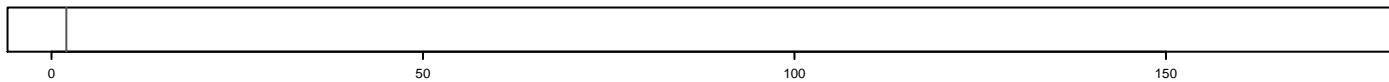

stability

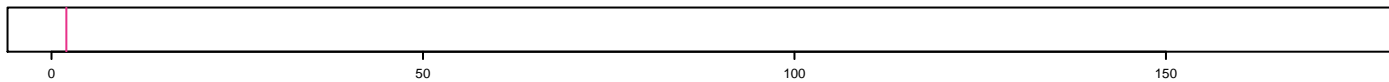

Small glutamine-rich tetratricopeptide repeat-containing protein alpha (O43765)

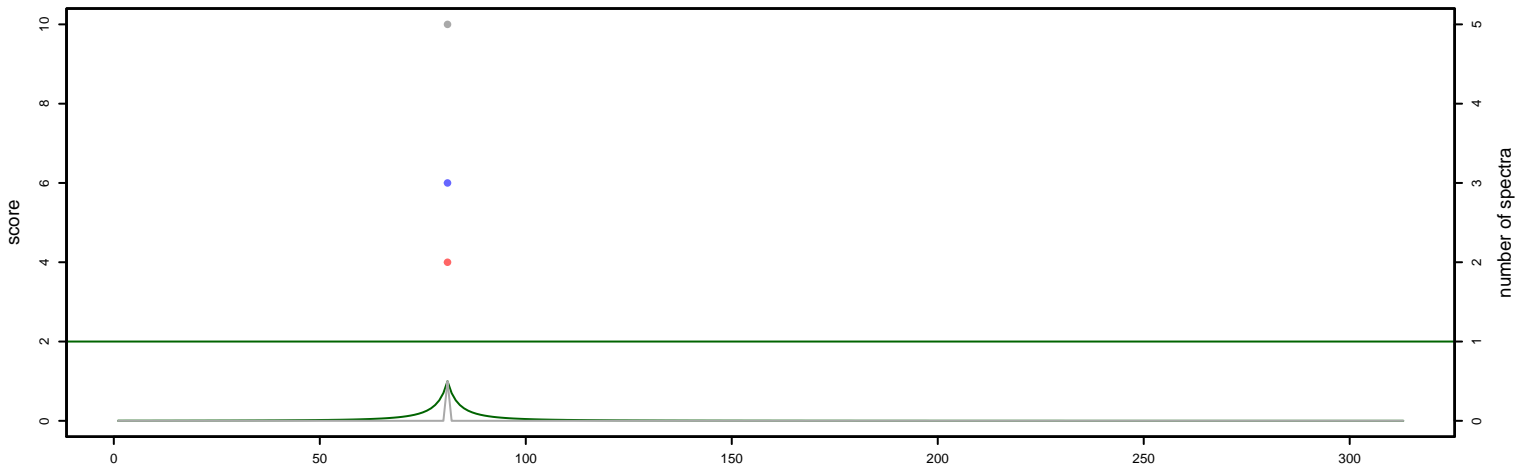

replica

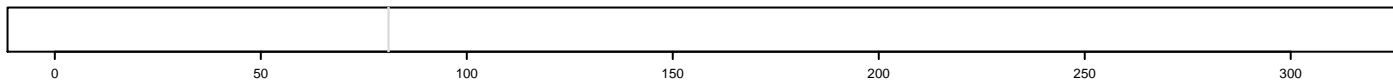

stability

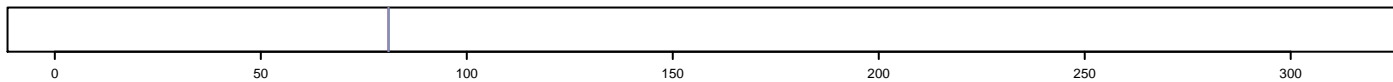

### Glia maturation factor gamma (O60234)

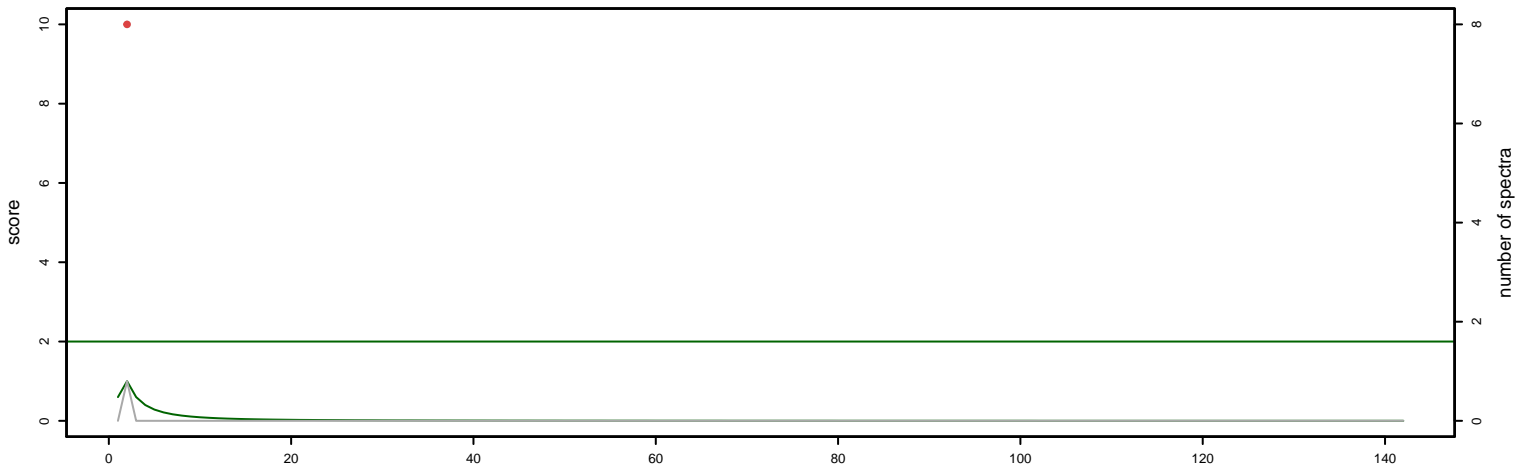

replica

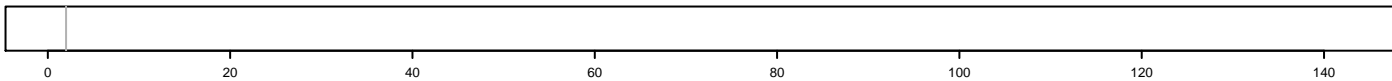

stability

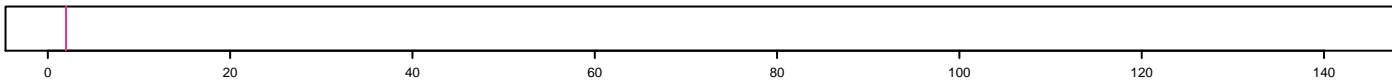

# Phosphoribosyl pyrophosphate synthase-associated protein 2 (O60256)

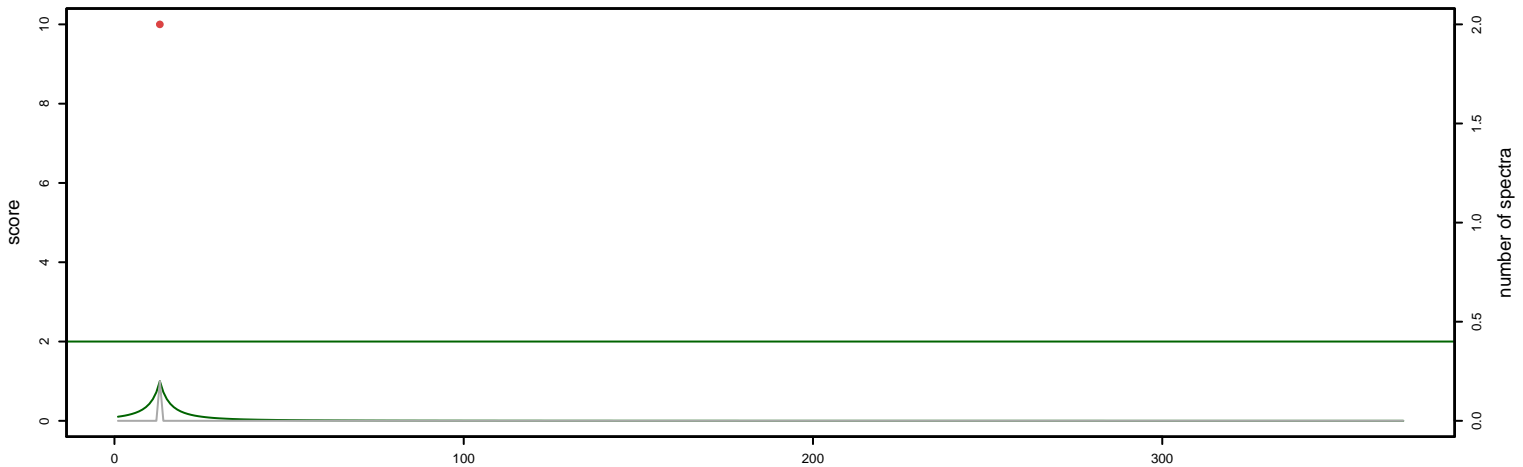

replica

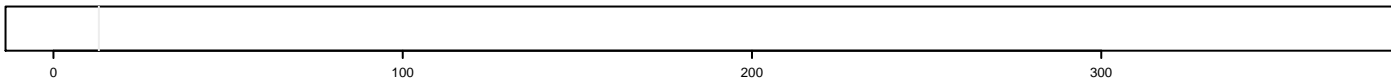

stability

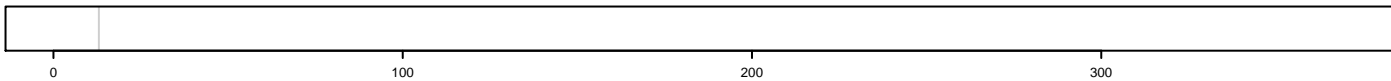

# Putative nucleoside diphosphate kinase (O60361)

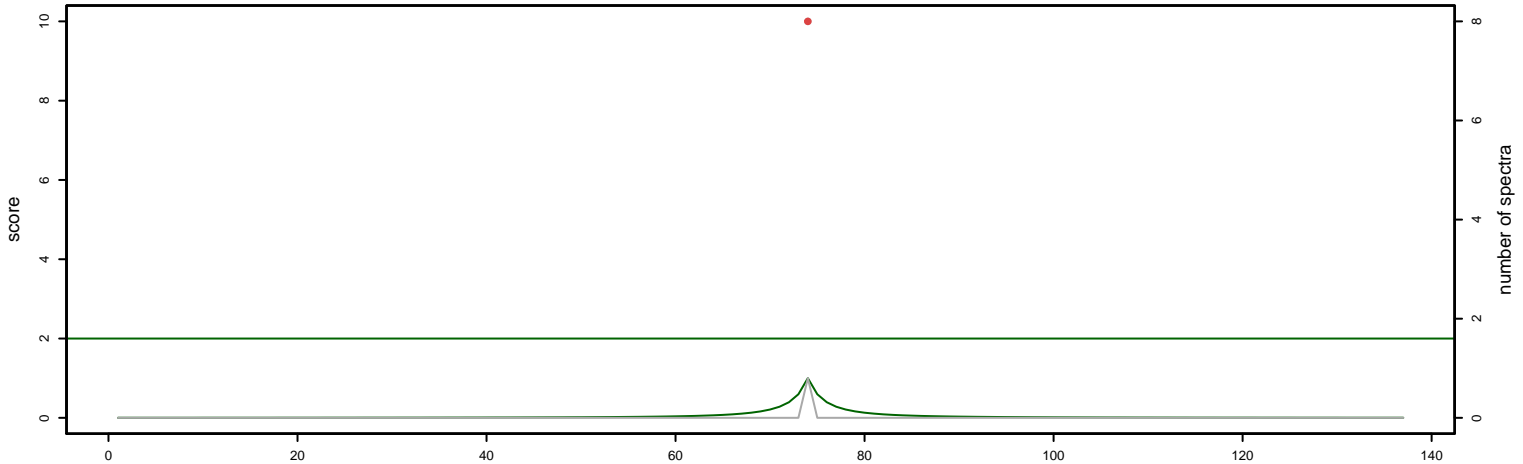

replica

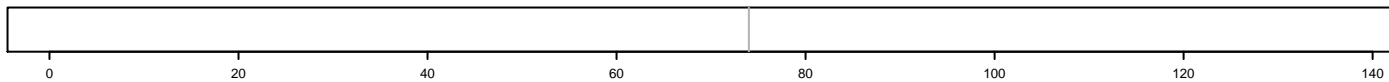

stability

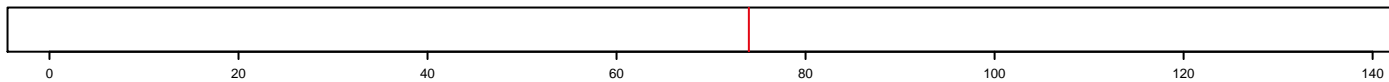

# Importin subunit alpha-7 (O60684)

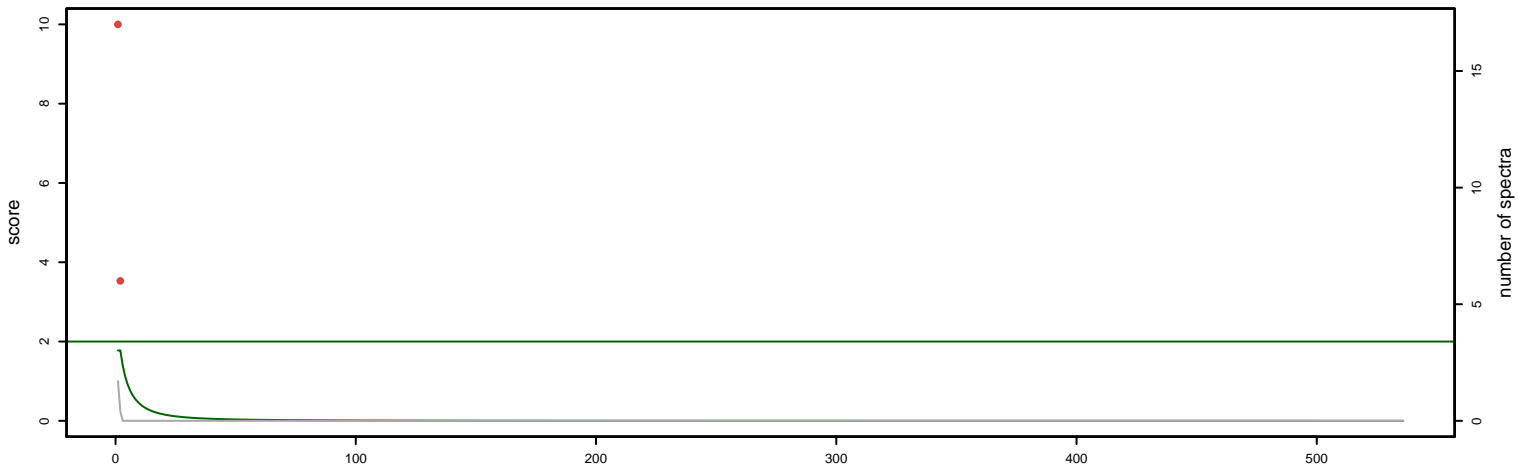

replica

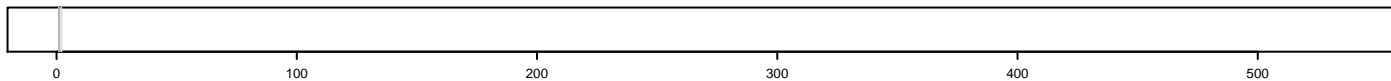

stability

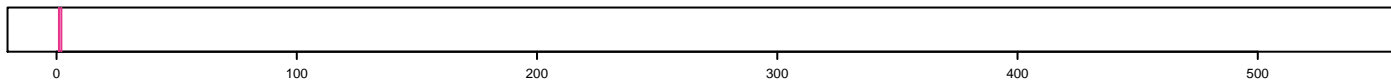



### Target of Myb protein 1 (O60784)

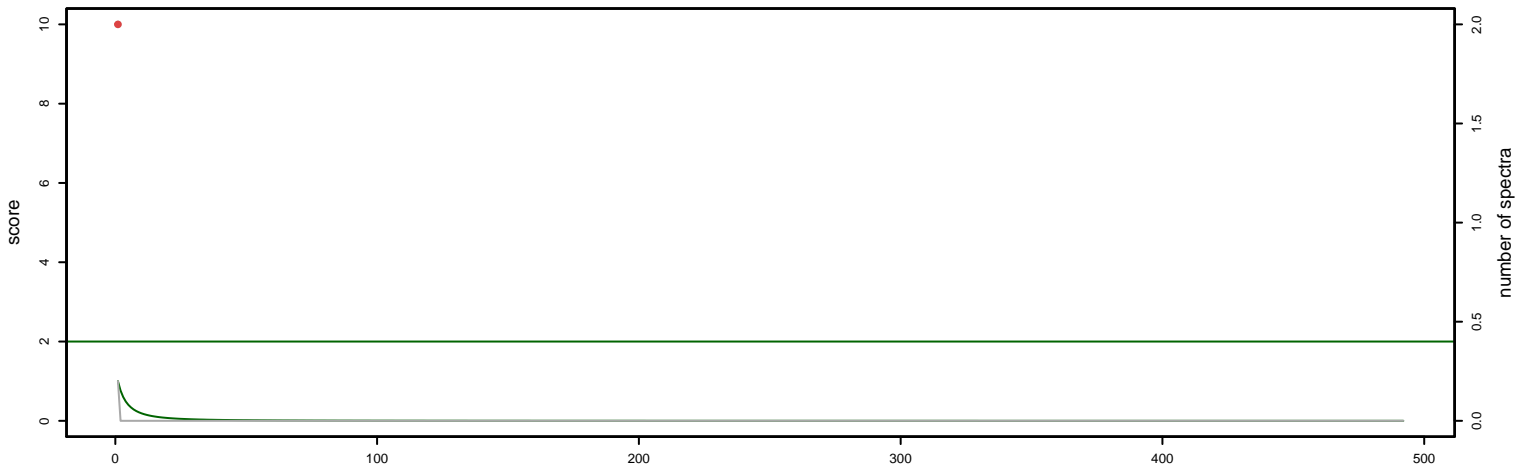

replica

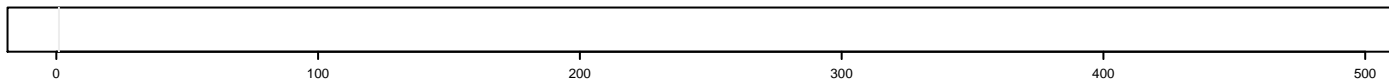

stability

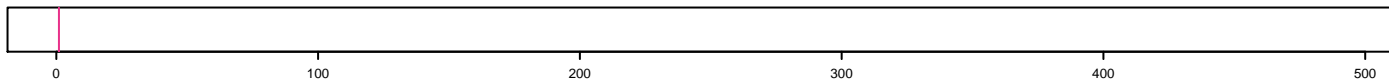

# Rho-associated protein kinase 2 (O75116)

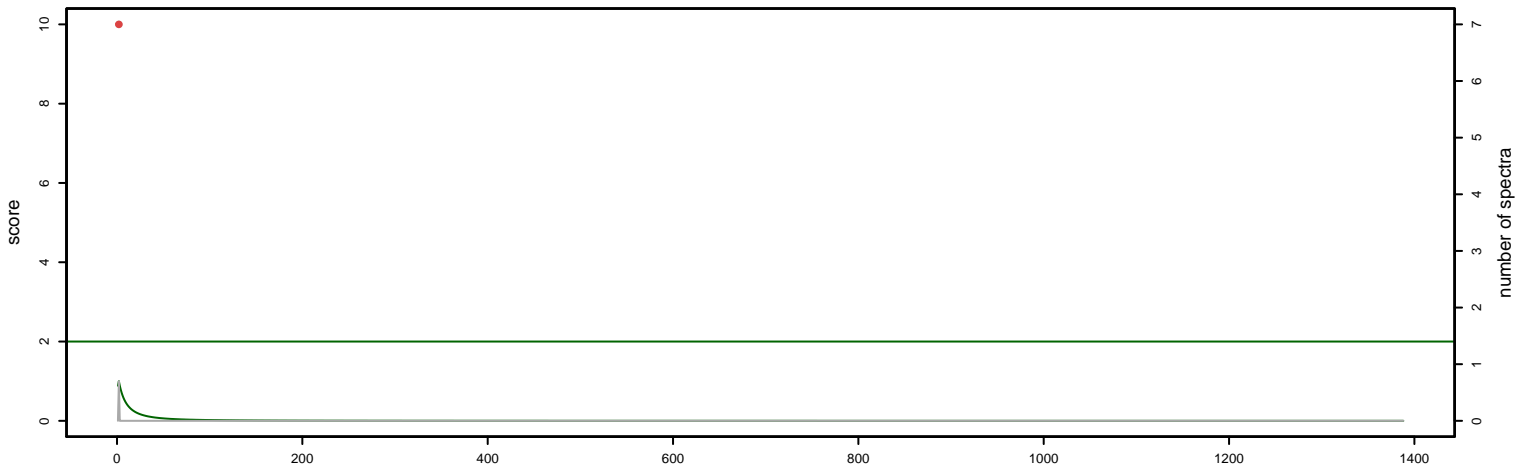

replica

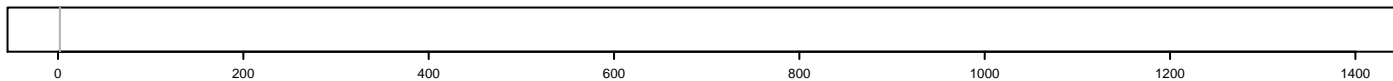

stability

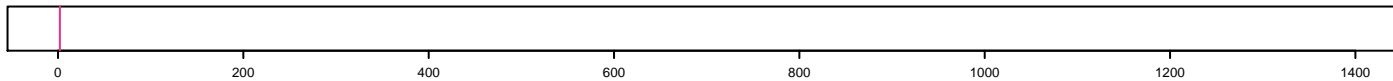

### DnaJ homolog subfamily B member 6 (O75190)

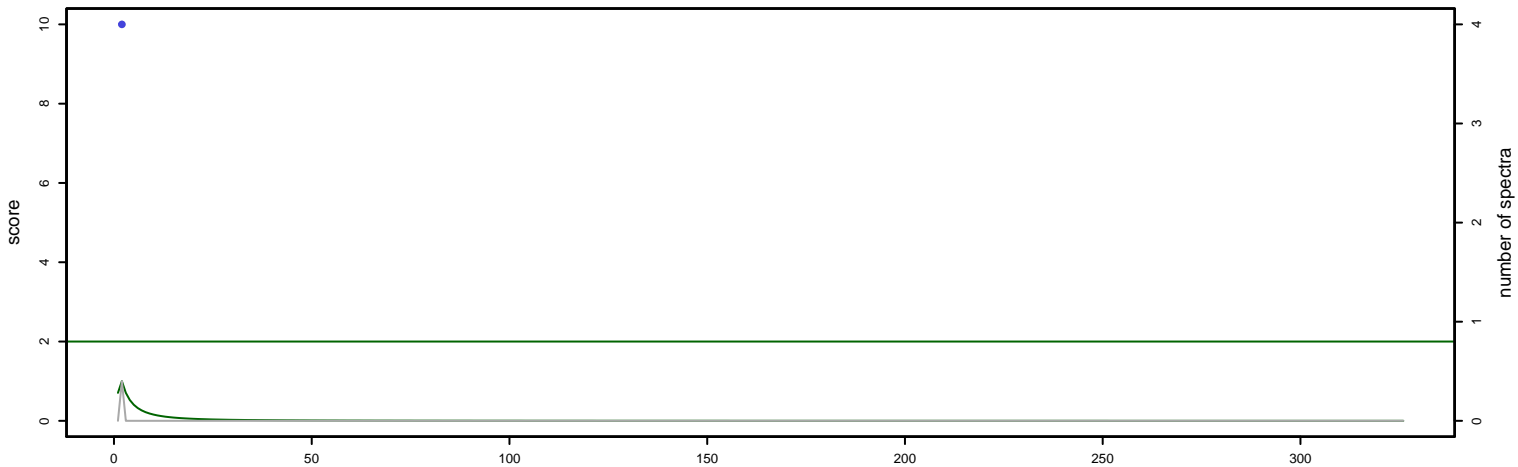

replica

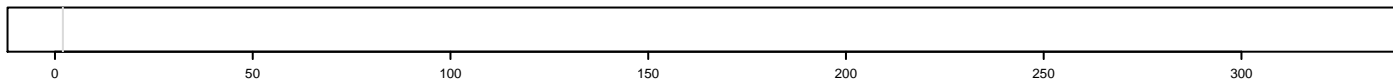

stability

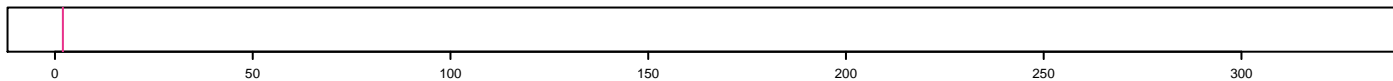

### V-type proton ATPase subunit G 1 (O75348)

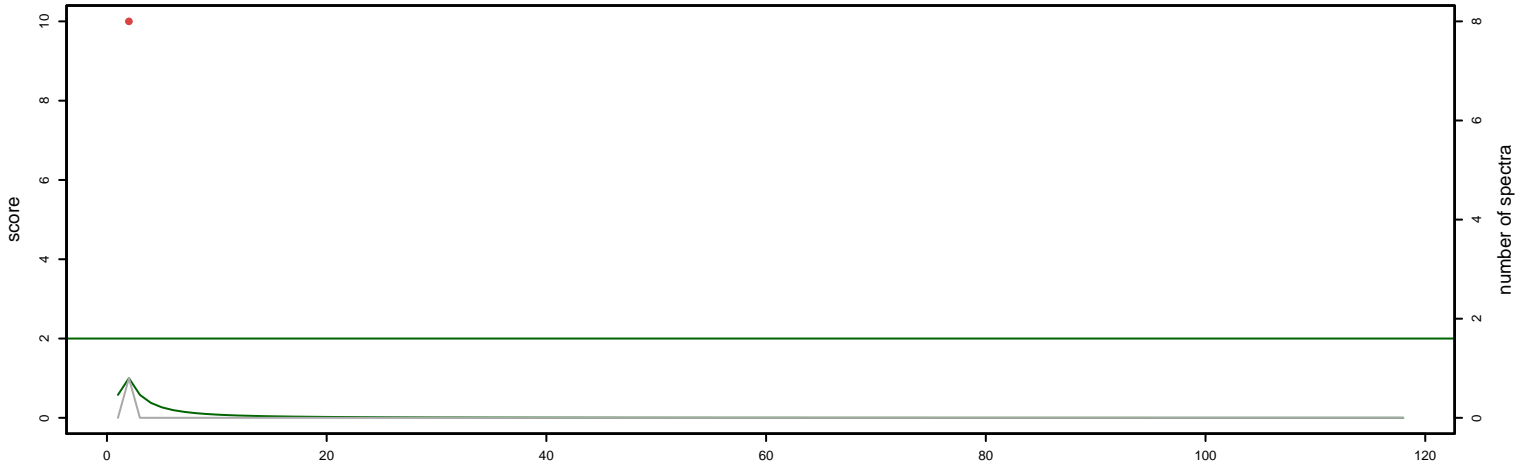

replica

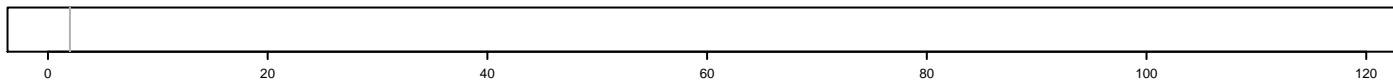

stability

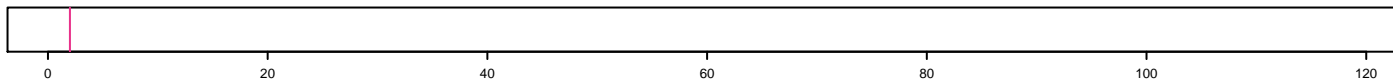

# Mannose-P-dolichol utilization defect 1 protein (O75352)

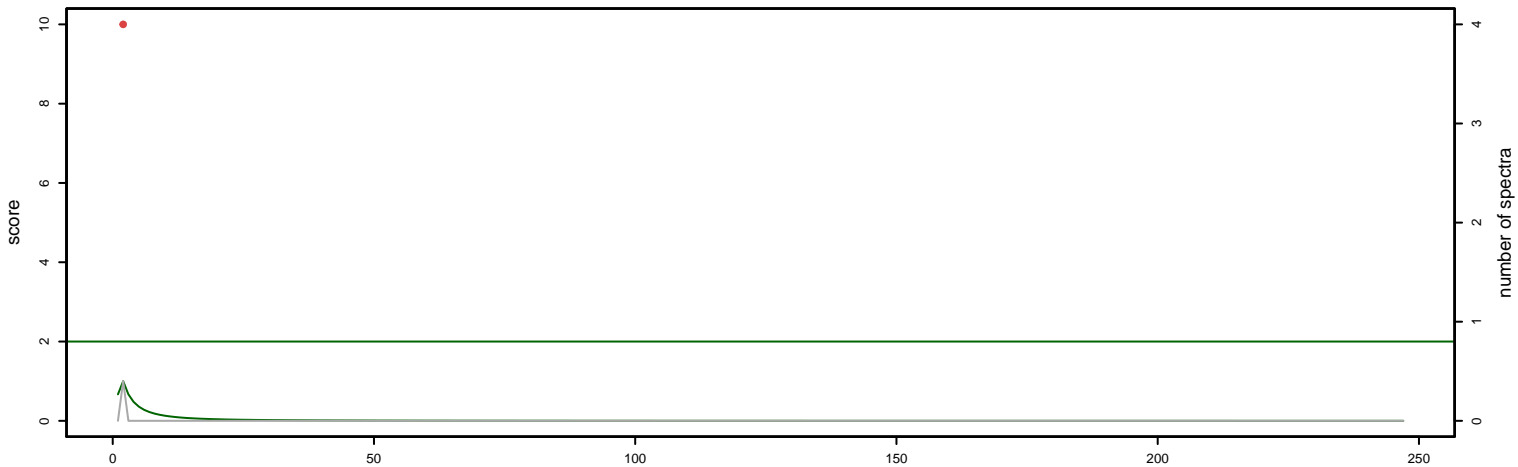

replica

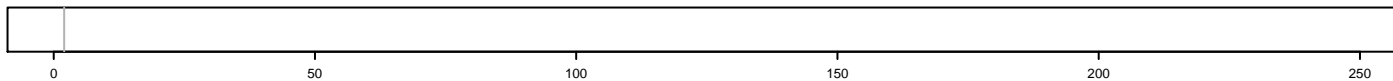

stability

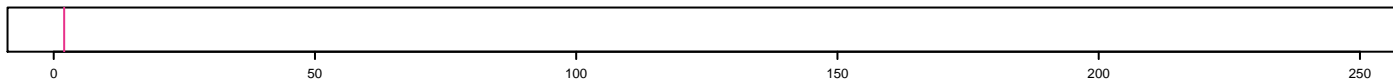

# Vesicle-traffic protein SEC22b (O75396)

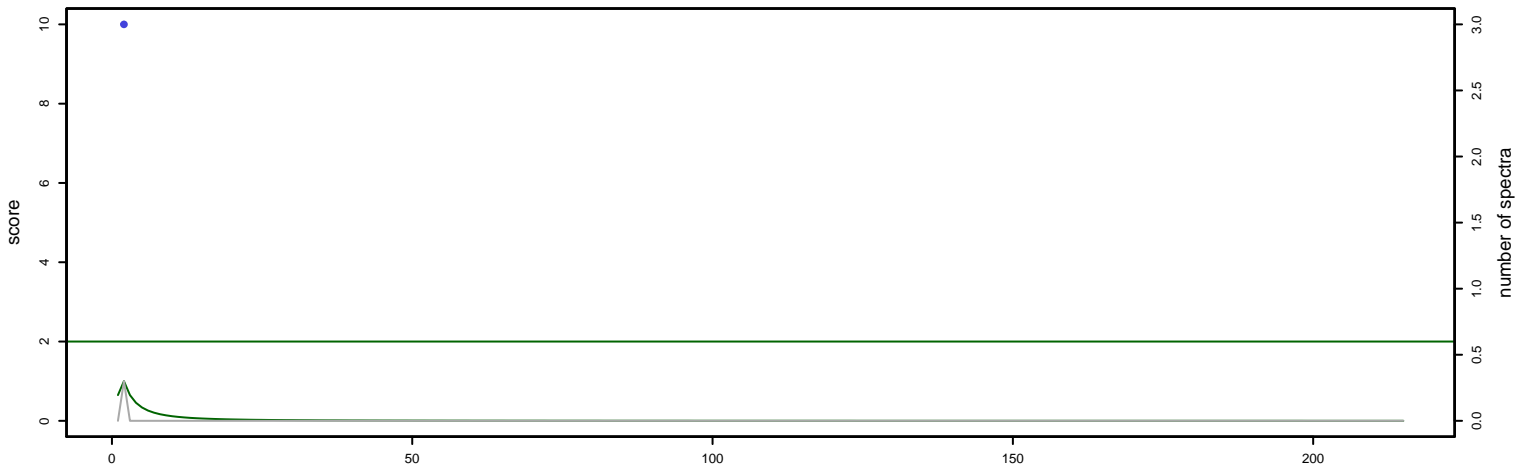

replica

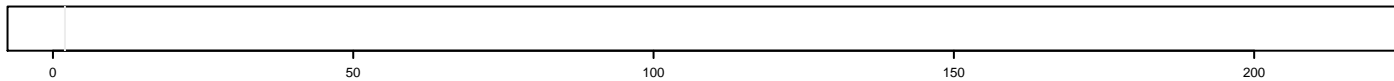

stability

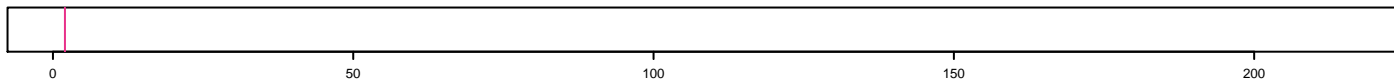

### TIP41-like protein (O75663)

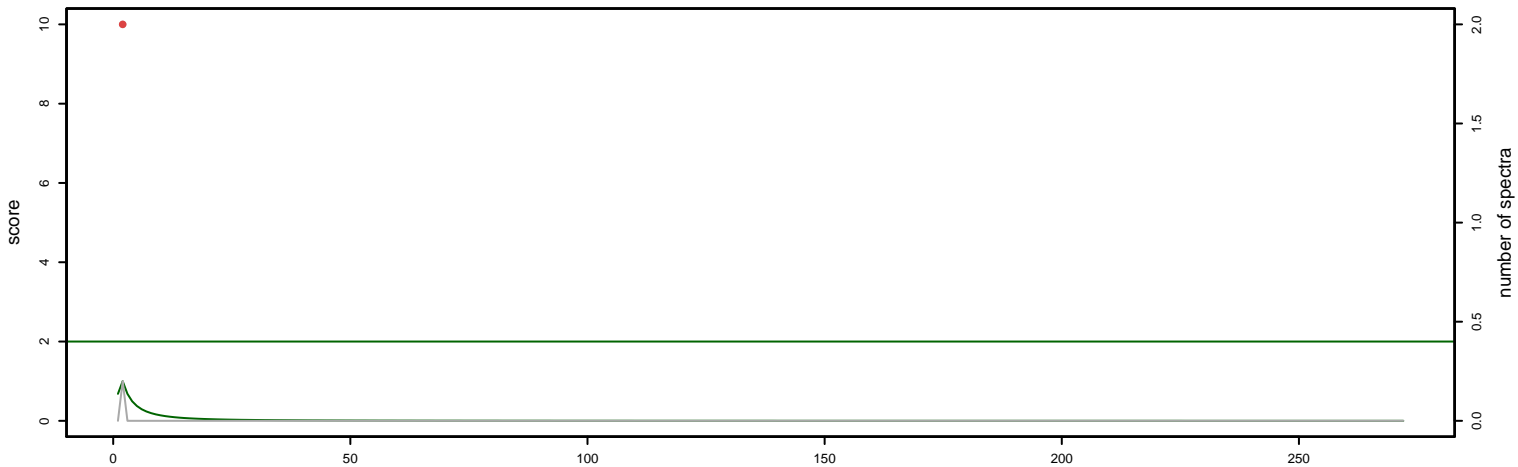

### replica

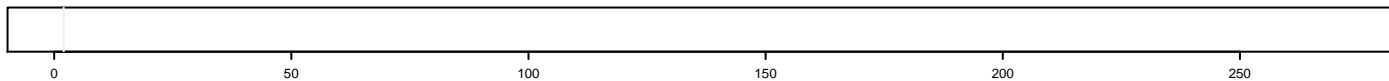

### stability

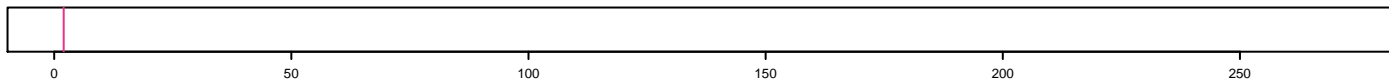

### Eukaryotic translation initiation factor 3 subunit J (O75822)

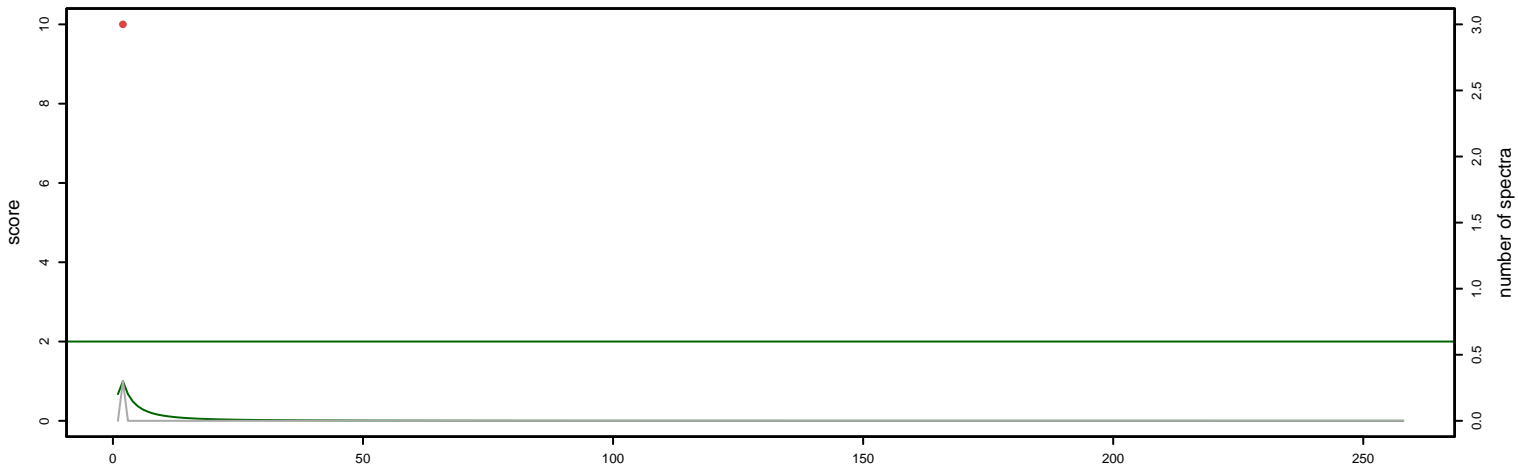

replica

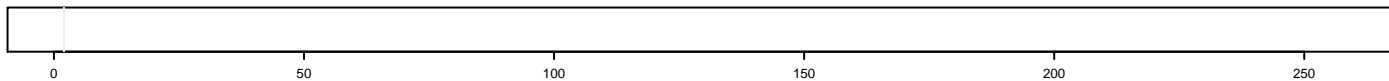

stability

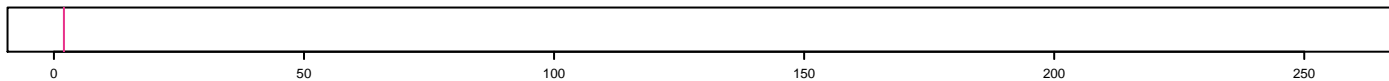



# Carbonyl reductase [NADPH] 3 (O75828)

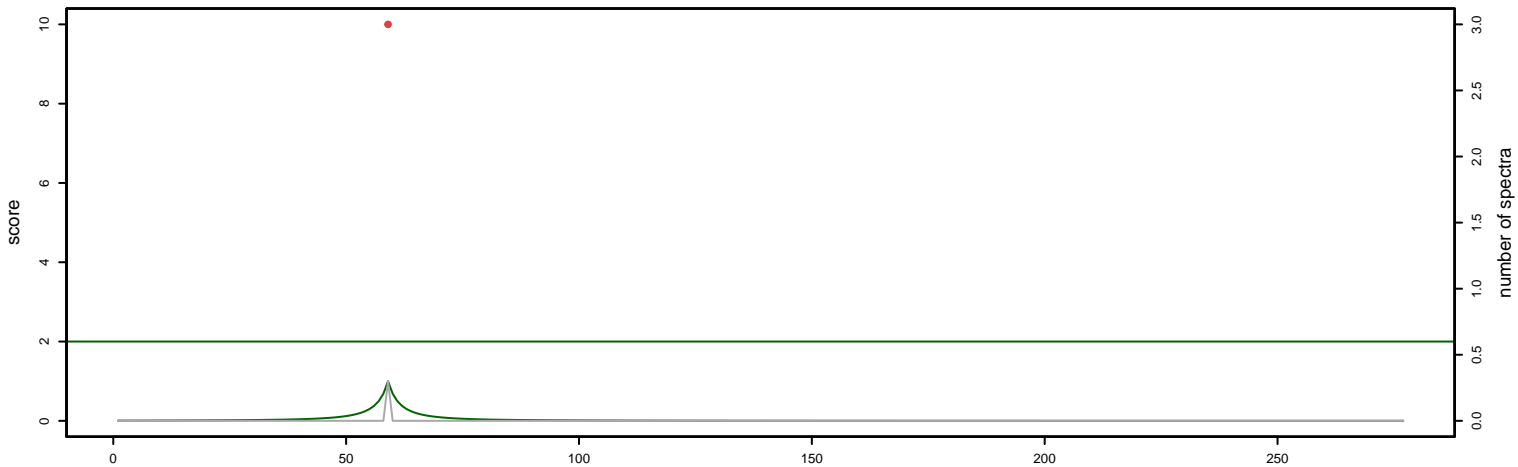

replica

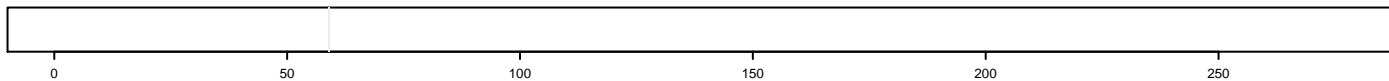

stability

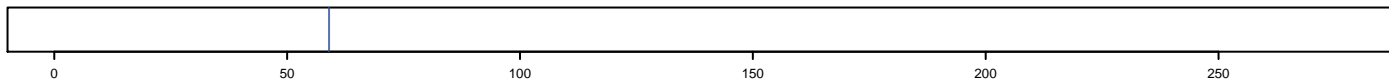

# Isocitrate dehydrogenase [NADP] cytoplasmic (O75874)

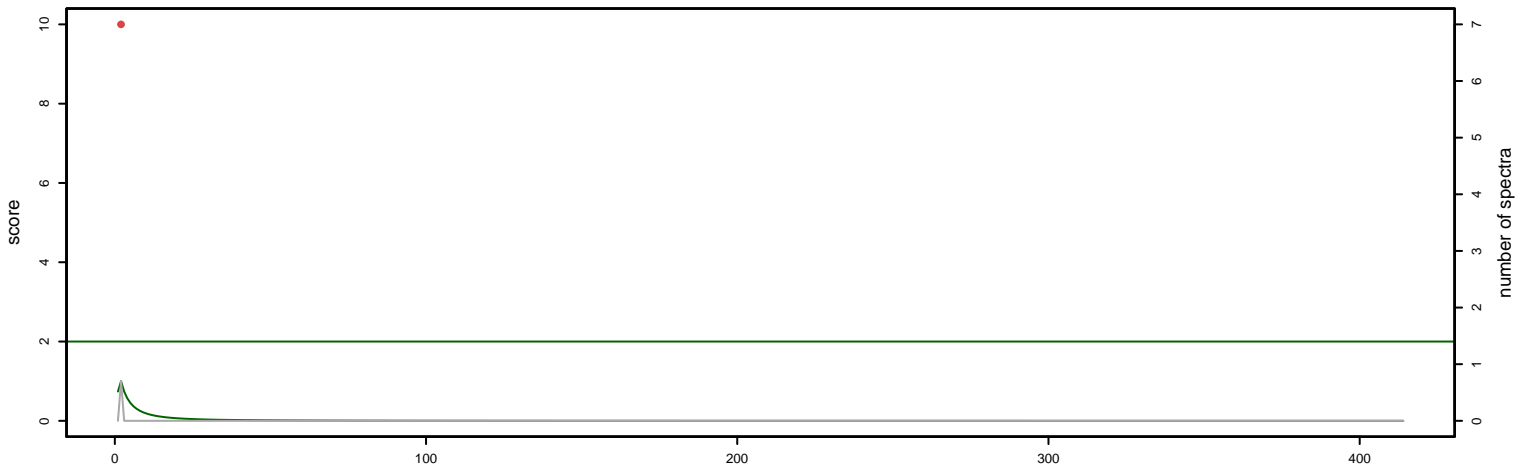

replica

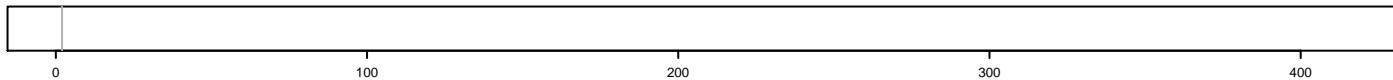

stability

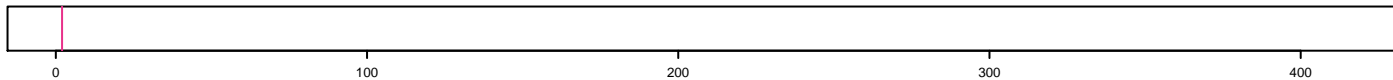

### Dynactin subunit 3 (O75935)

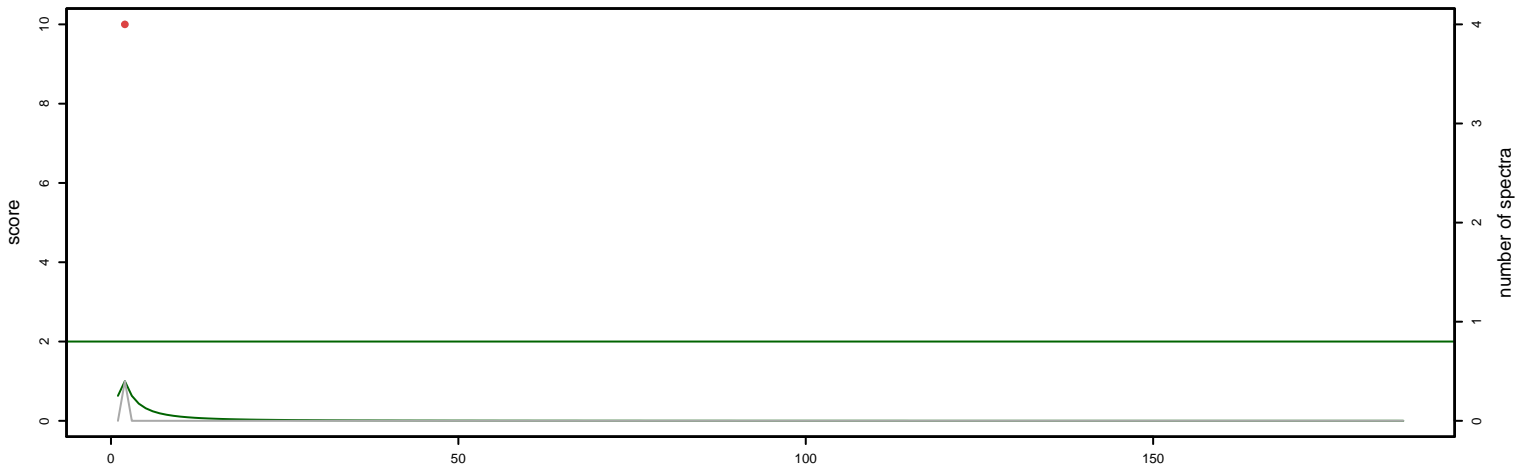

replica

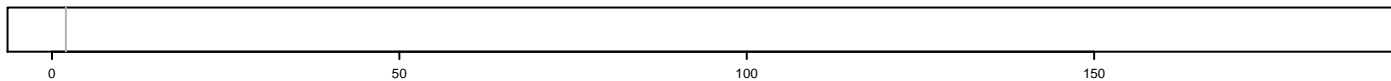

stability

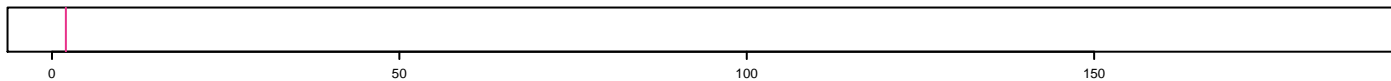

# Flotillin-1 (O75955)

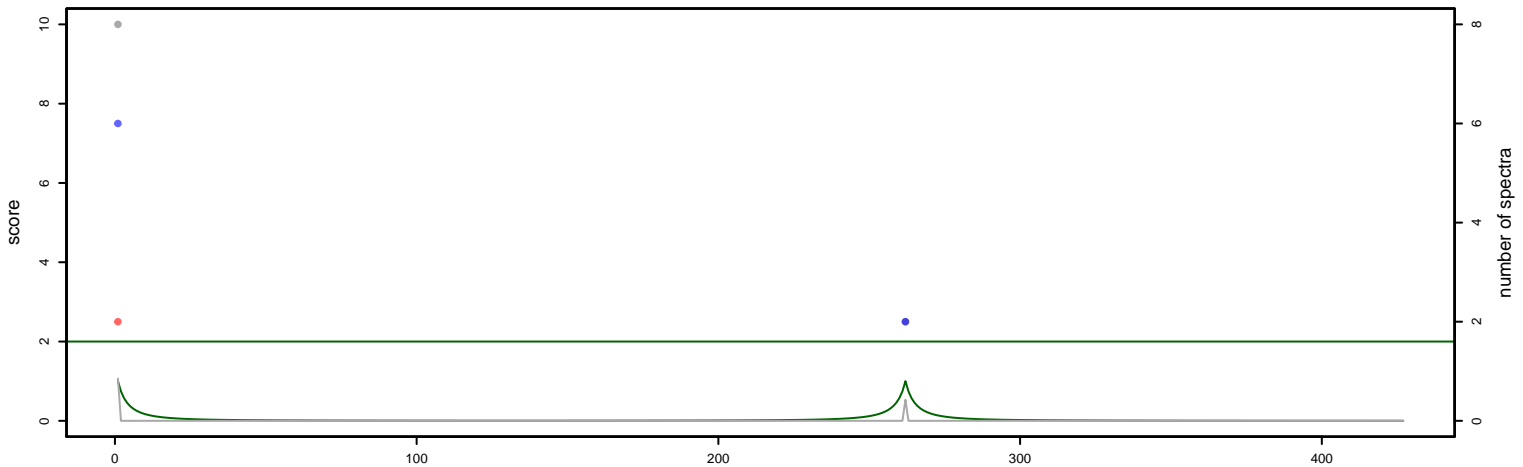

replica

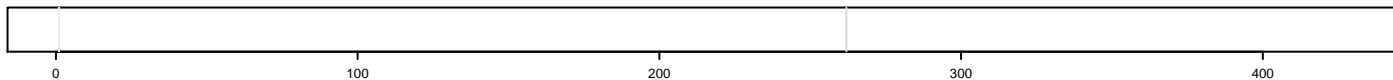

stability

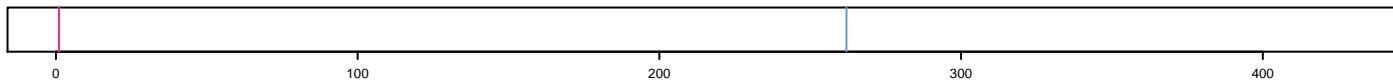

### Glutaredoxin-3 (O76003)

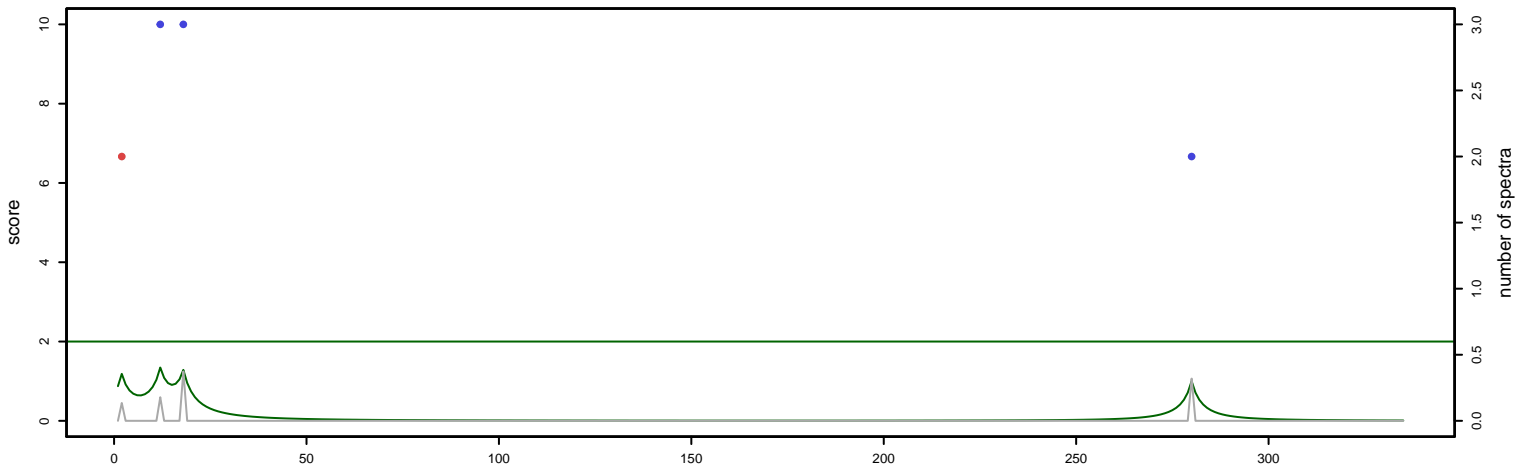

replica

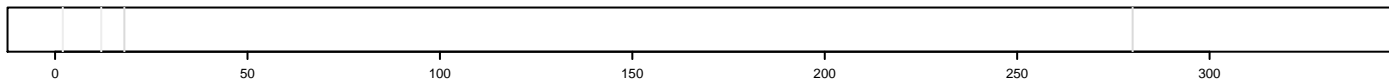

stability

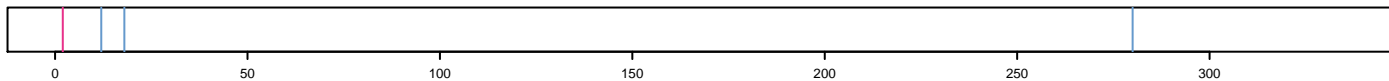

Probable cytosolic iron-sulfur protein assembly protein CIAO1 (O76071)

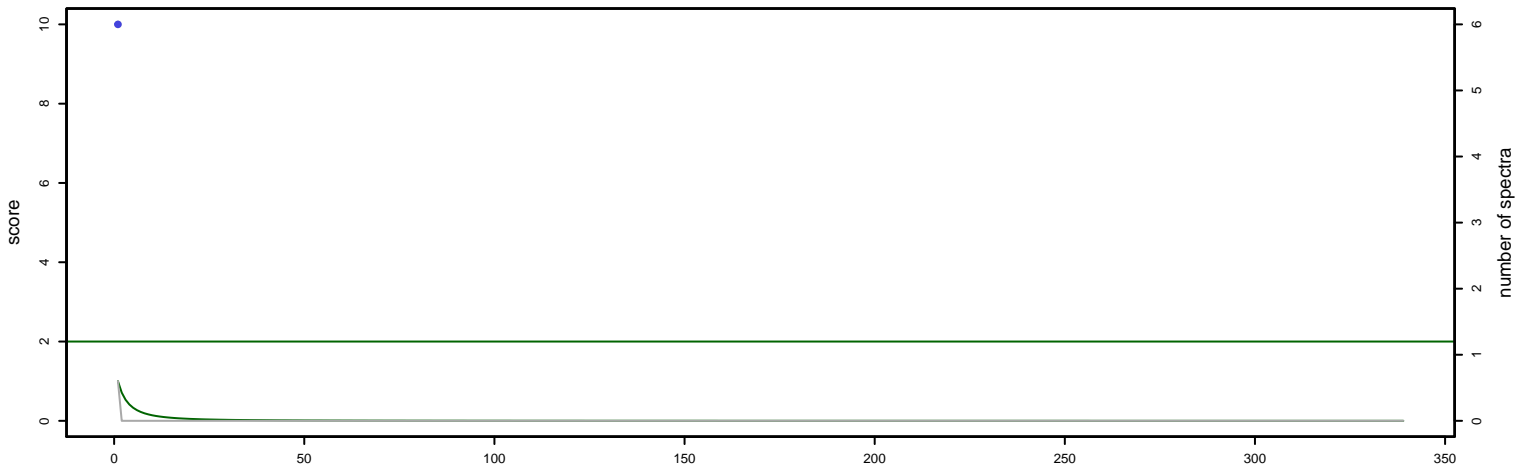

replica

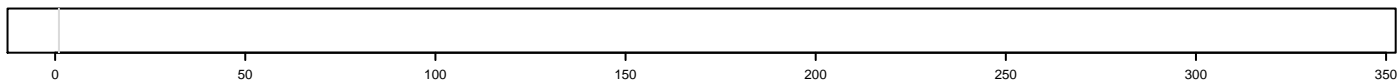

stability

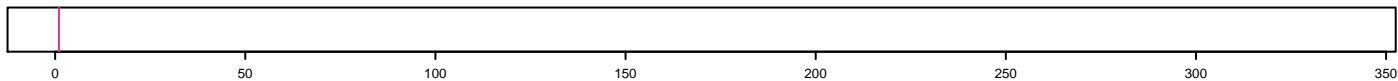

### Proline synthase co-transcribed bacterial homolog protein (O94903)

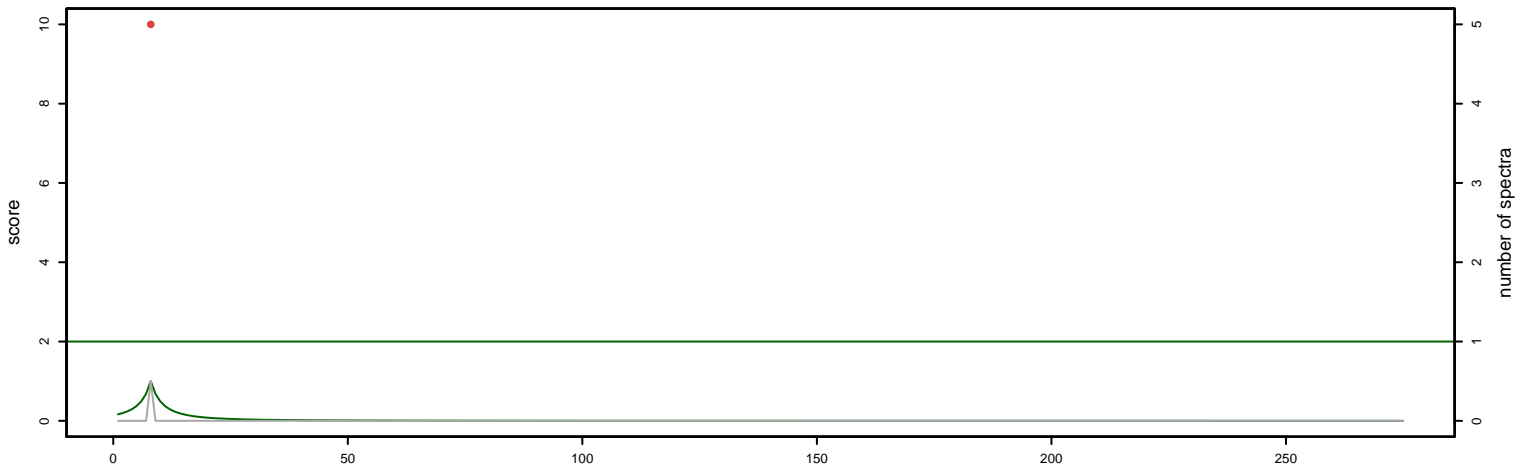

replica

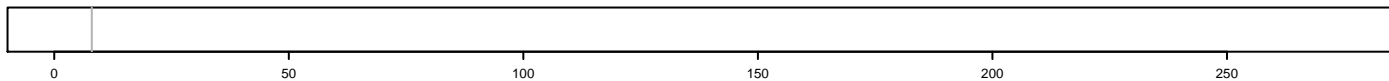

stability

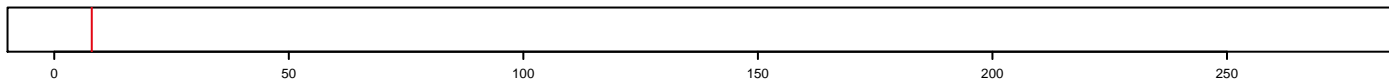

# Cyclin-D1-binding protein 1 (O95273)

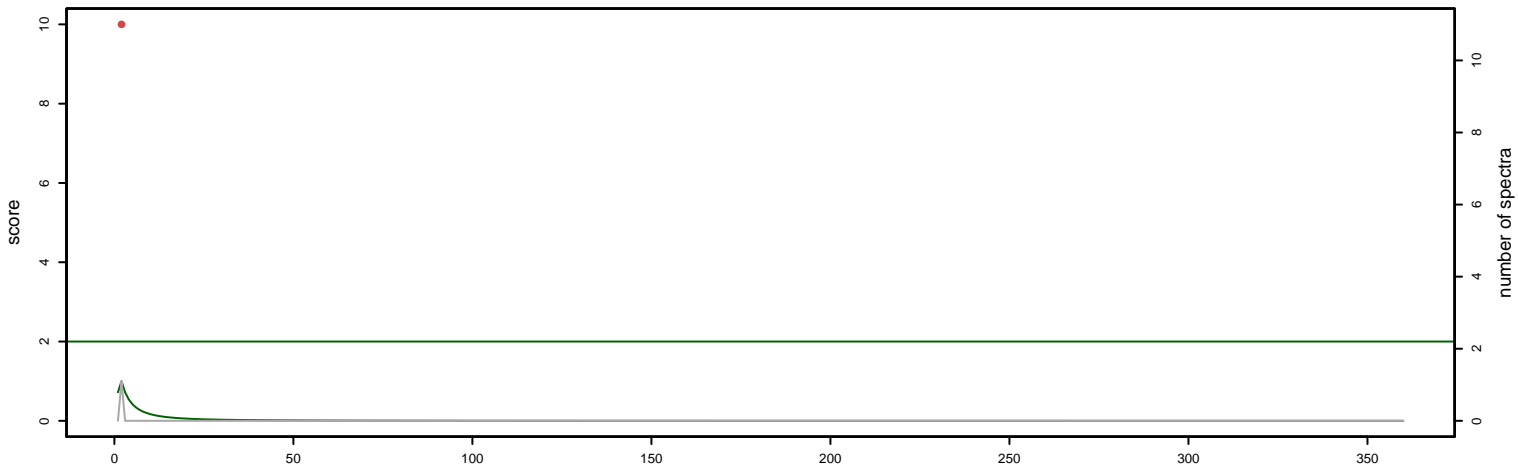

replica

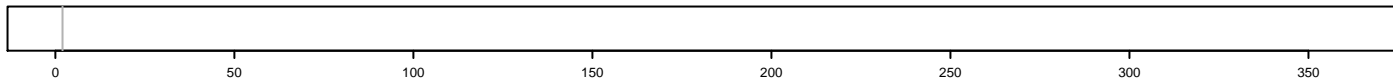

stability

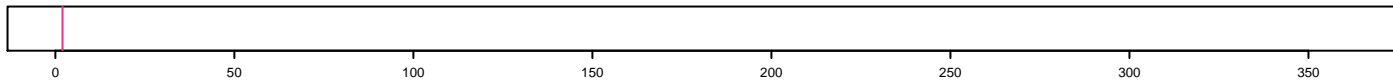



### 6-phosphogluconolactonase (O95336)

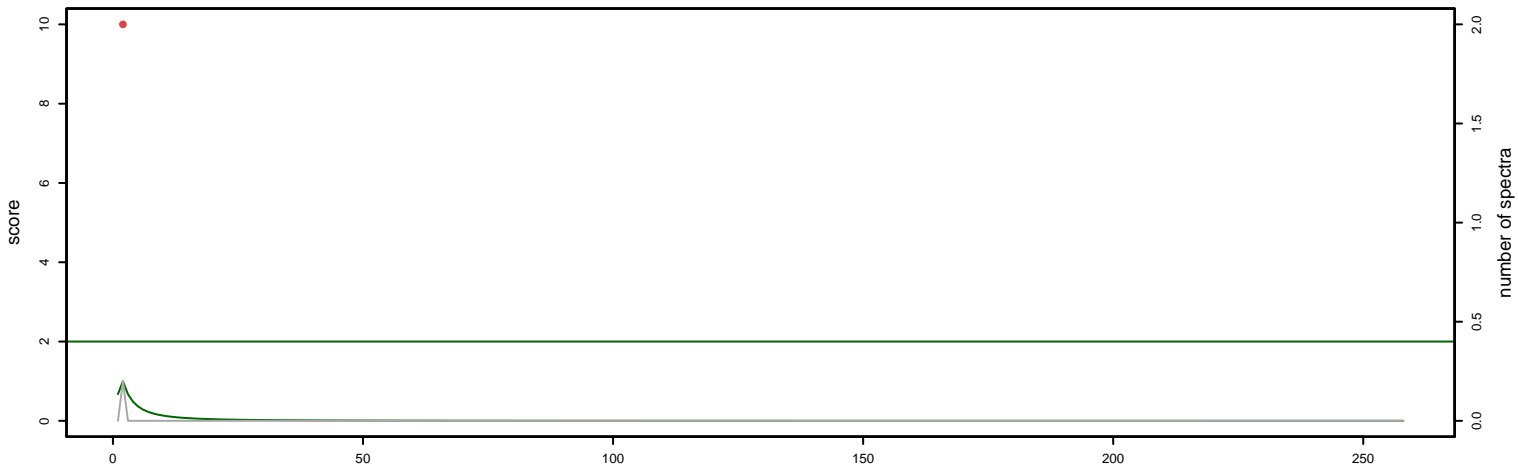

replica

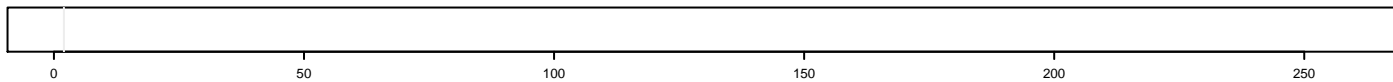

stability

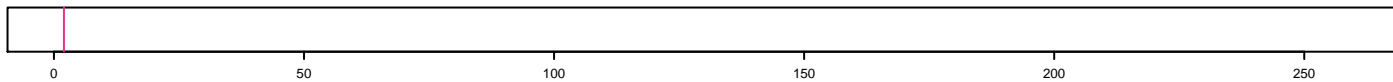

### Importin-7 (O95373)

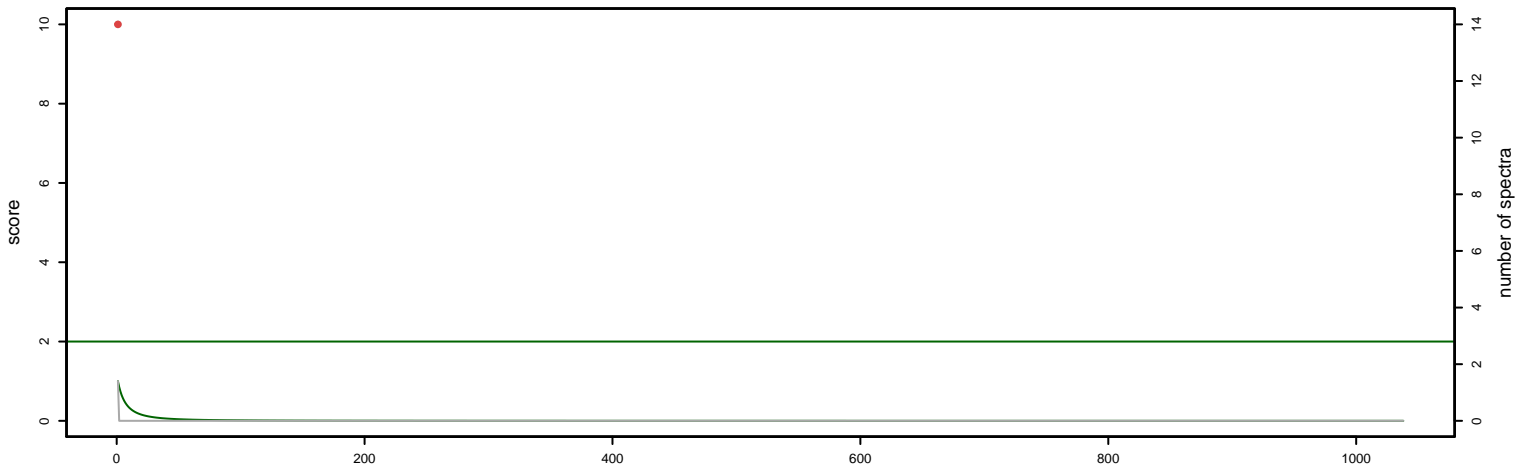

### replica

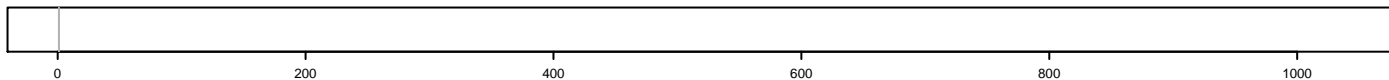

### stability

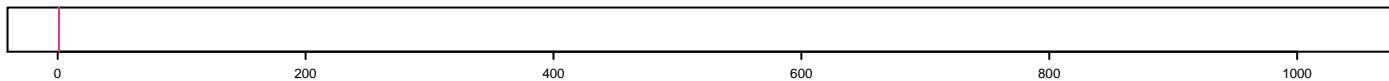

# Activator of 90 kDa heat shock protein ATPase homolog 1 (O95433)

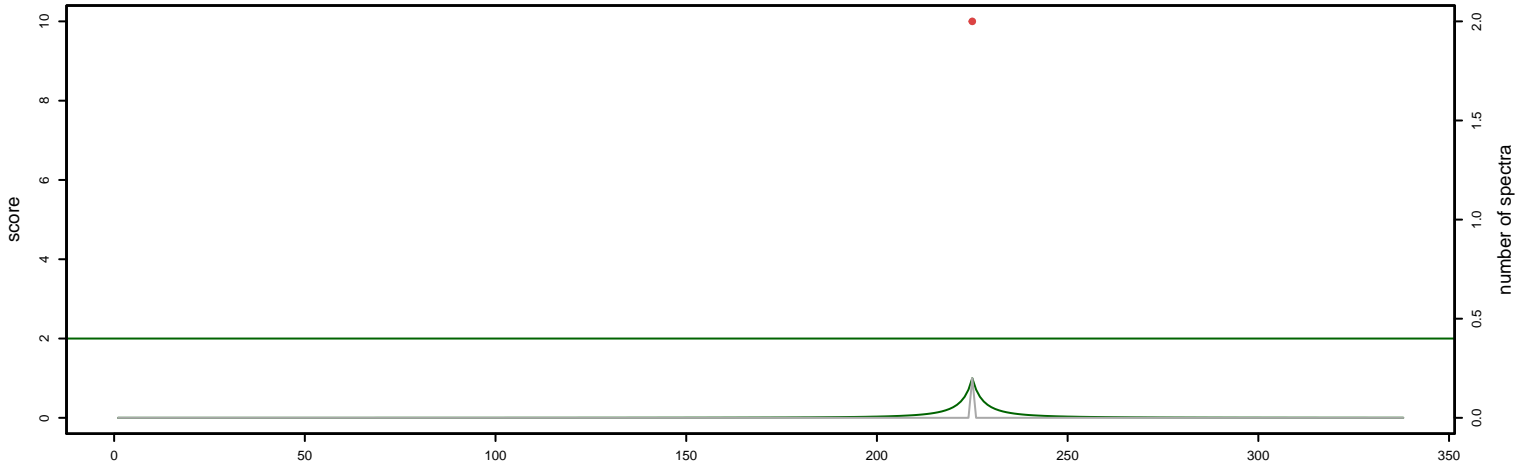

replica

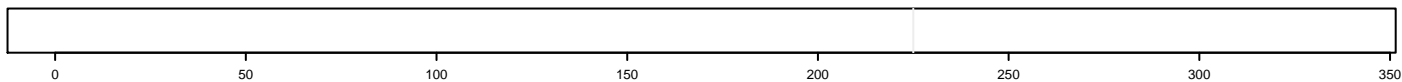

stability

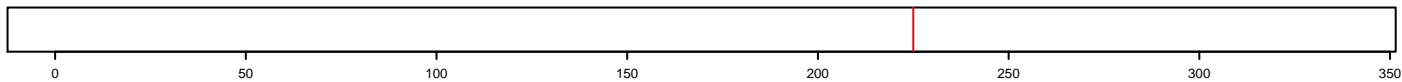

# Proteasome assembly chaperone 1 (O95456)

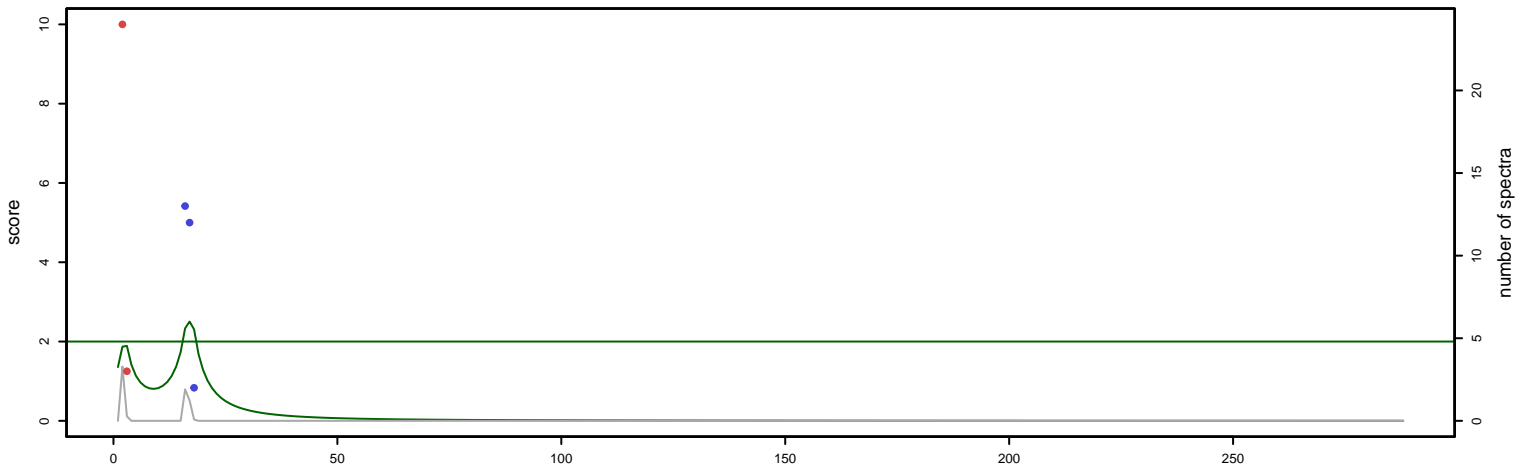

replica

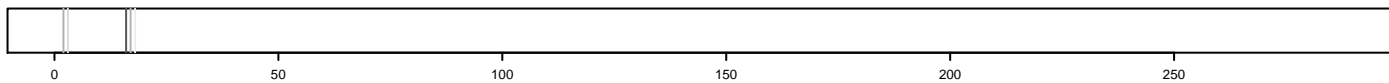

stability

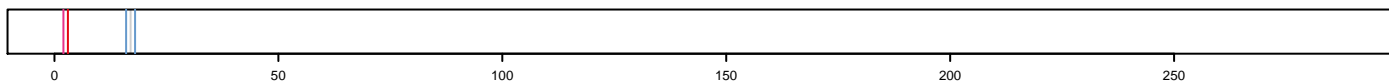

# Protein transport protein Sec24B (O95487)

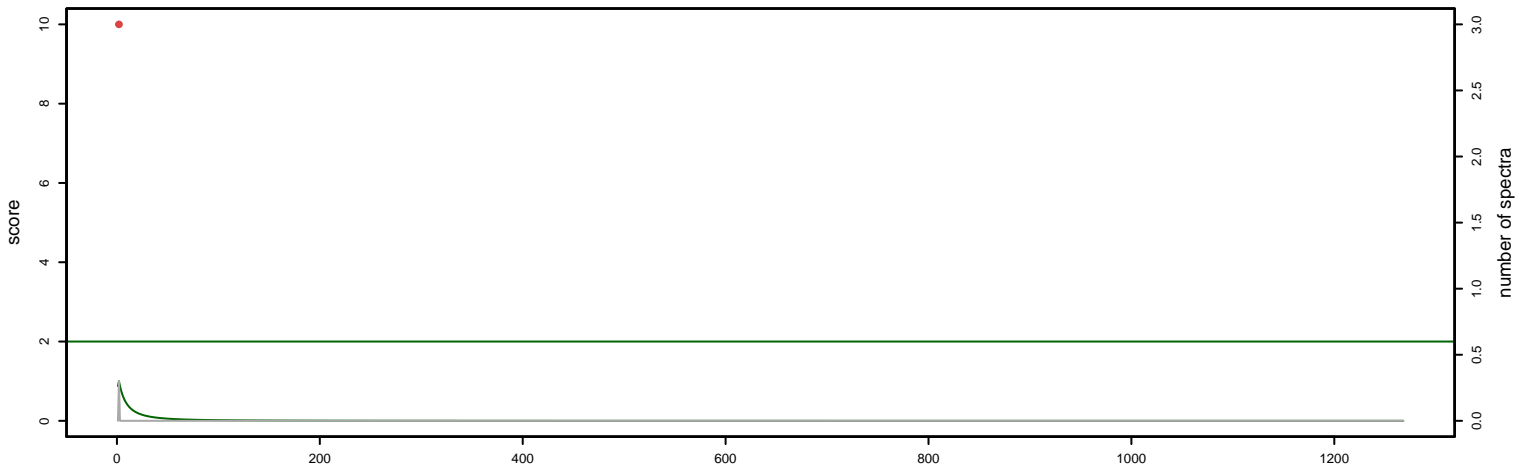

replica

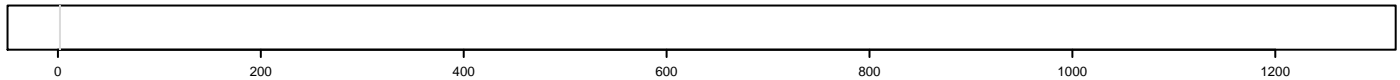

stability

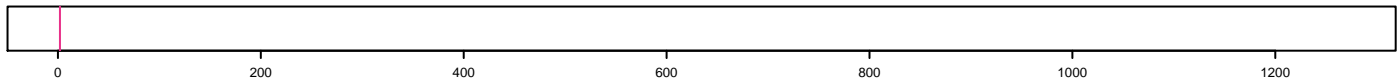

### STAM-binding protein (O95630)

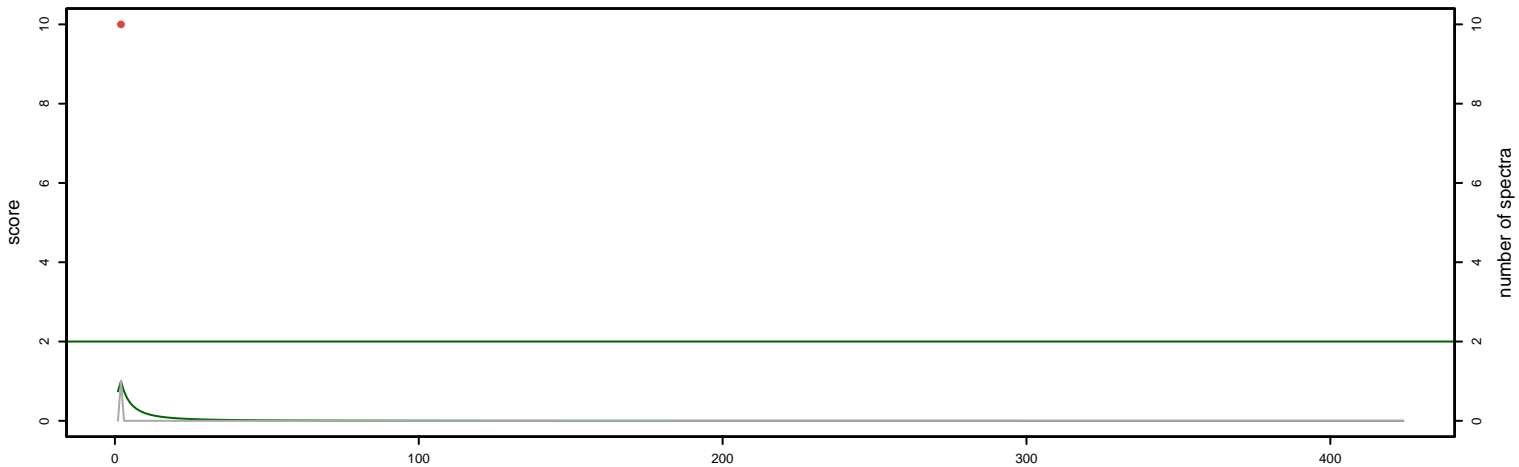

replica

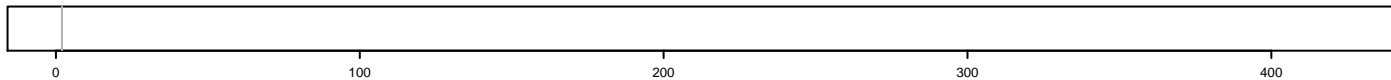

stability

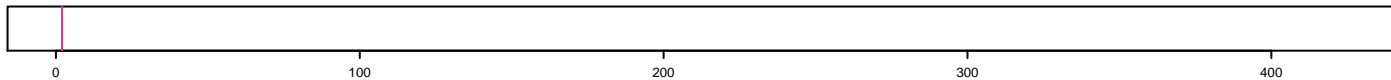

### Synaptosomal-associated protein 29 (O95721)

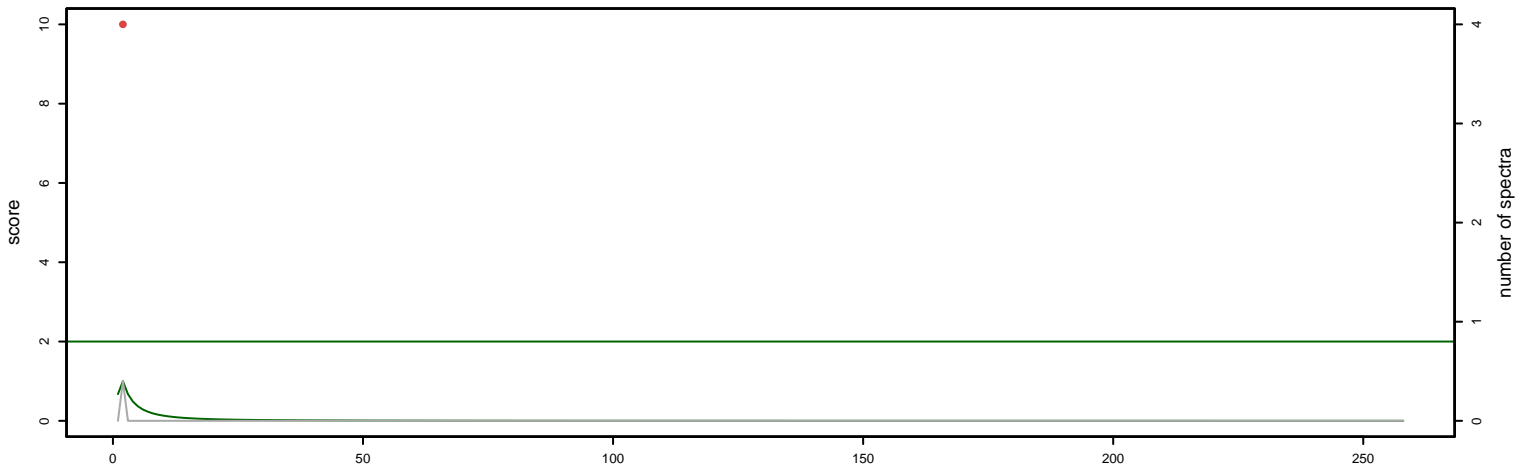

**replica**

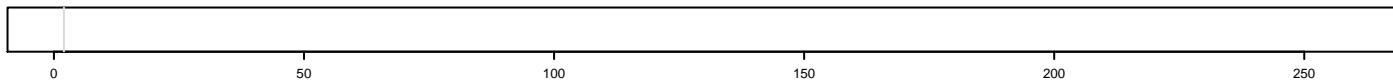

**stability**

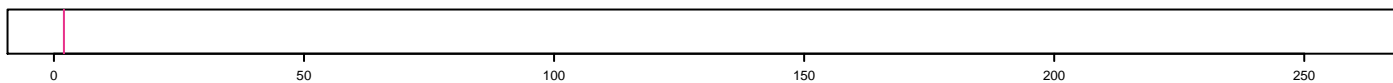

# Serine/threonine-protein kinase OSR1 (O95747)

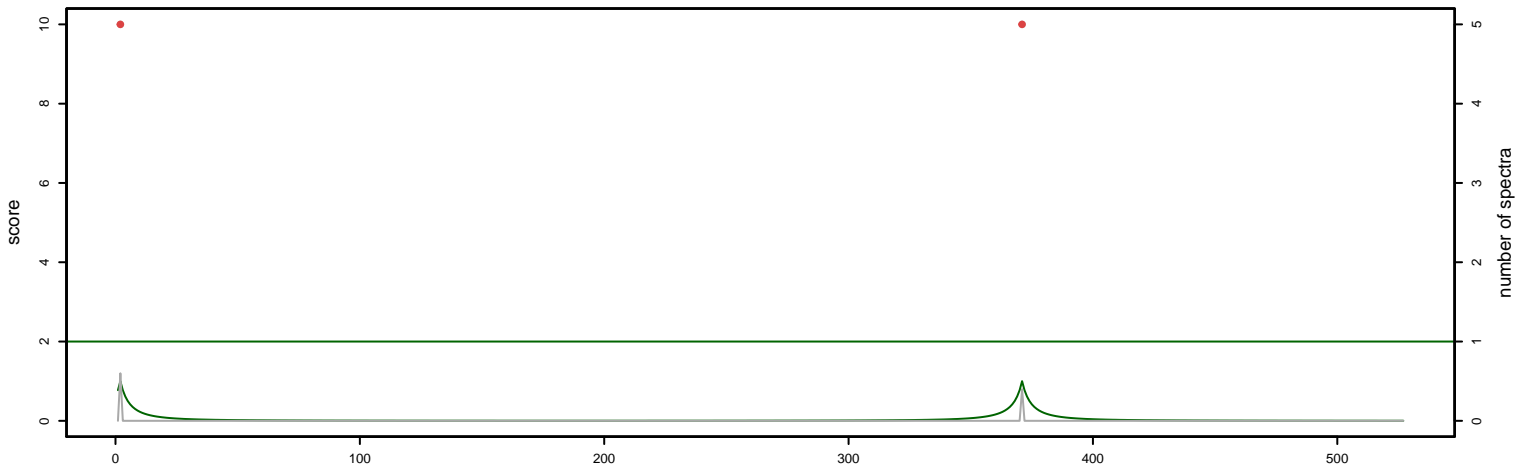

replica

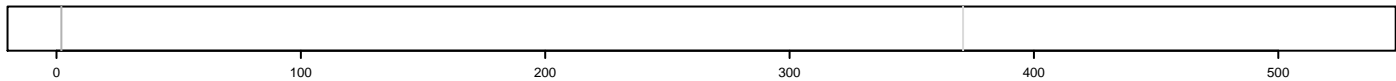

stability

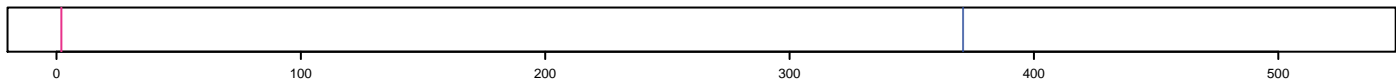



# Geranylgeranyl pyrophosphate synthase (O95749)

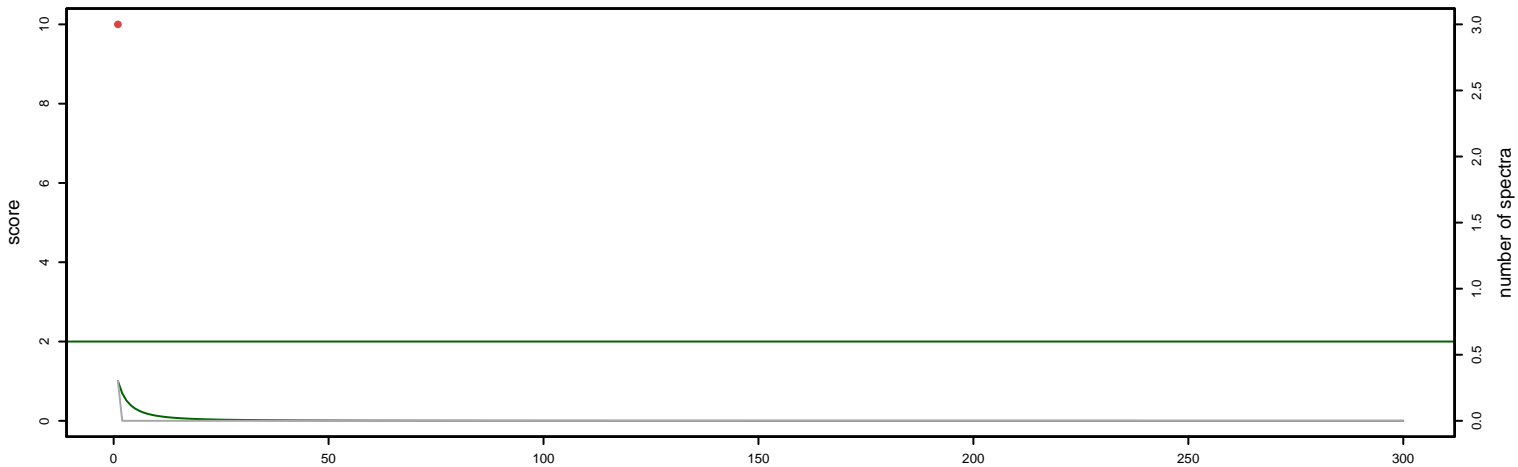

replica

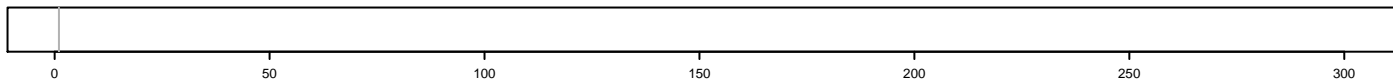

stability

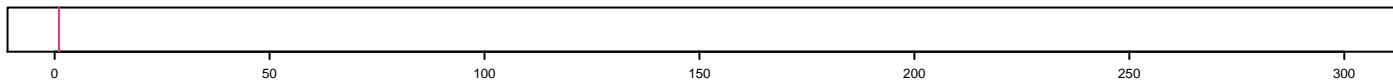

# N-alpha-acetyltransferase 38, NatC auxiliary subunit (O95777)

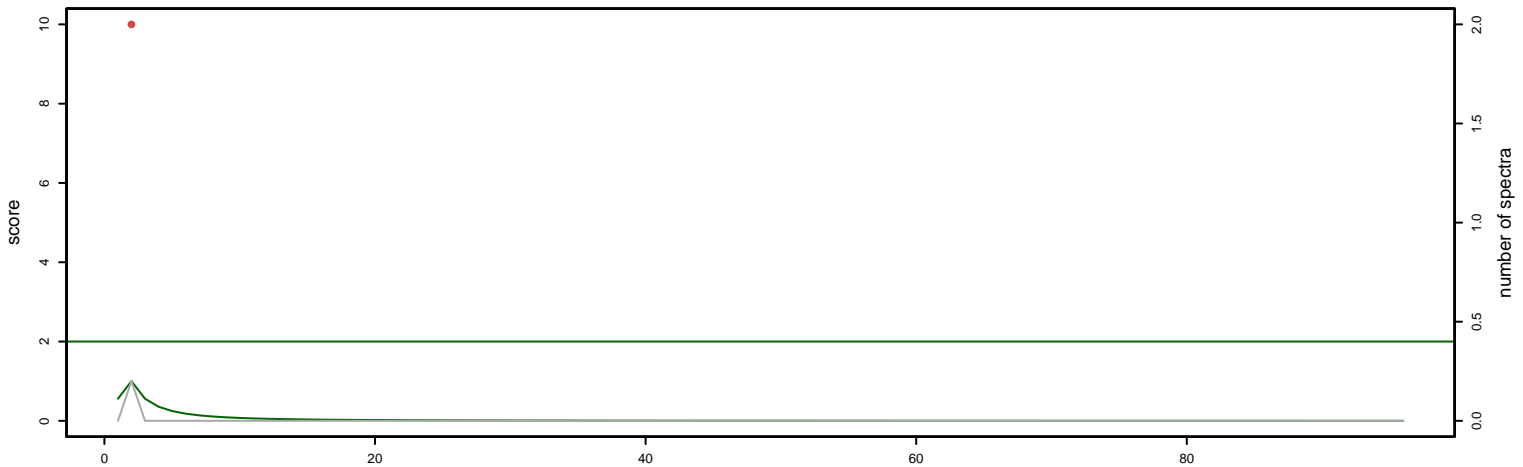

replica

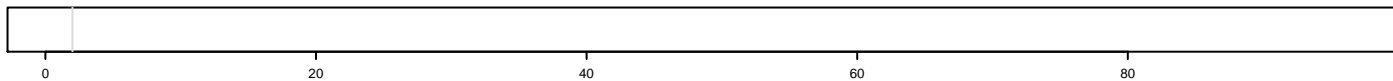

stability

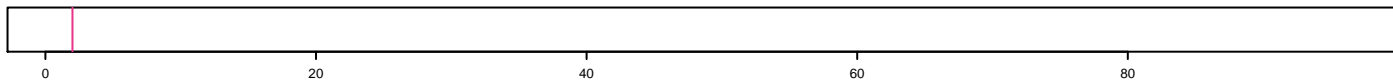

# Transmembrane protein 50A (O95807)

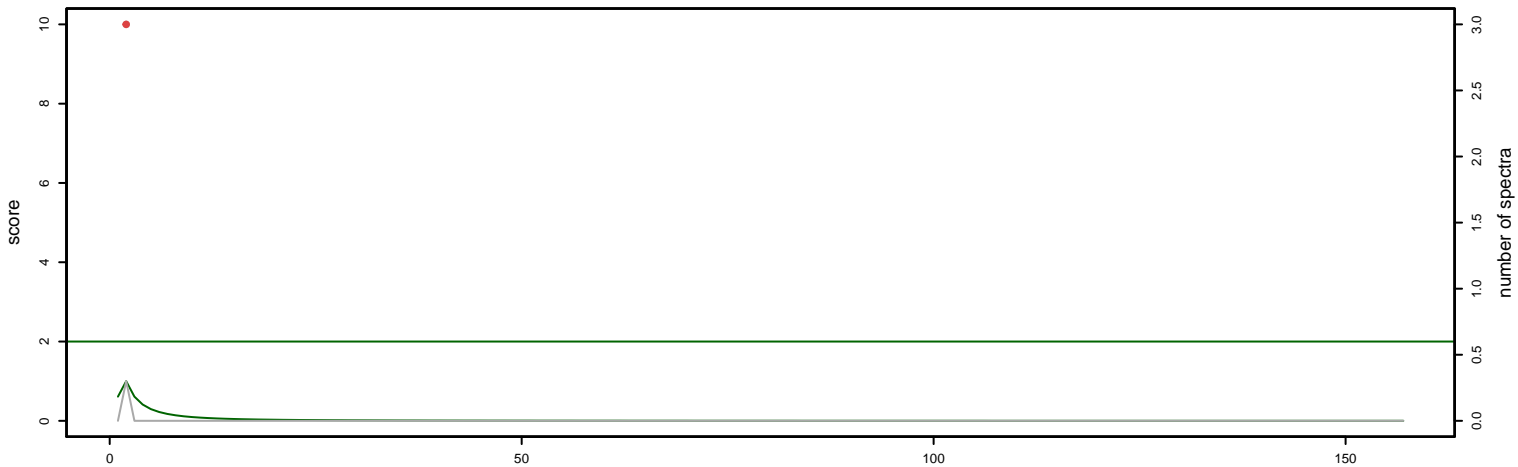

replica

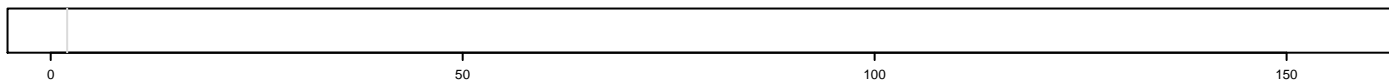

stability

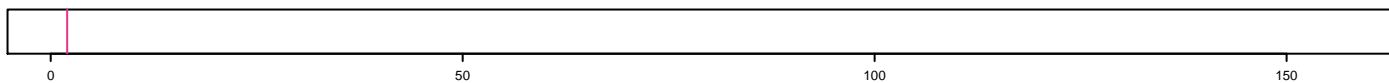

# BAG family molecular chaperone regulator 2 (O95816)

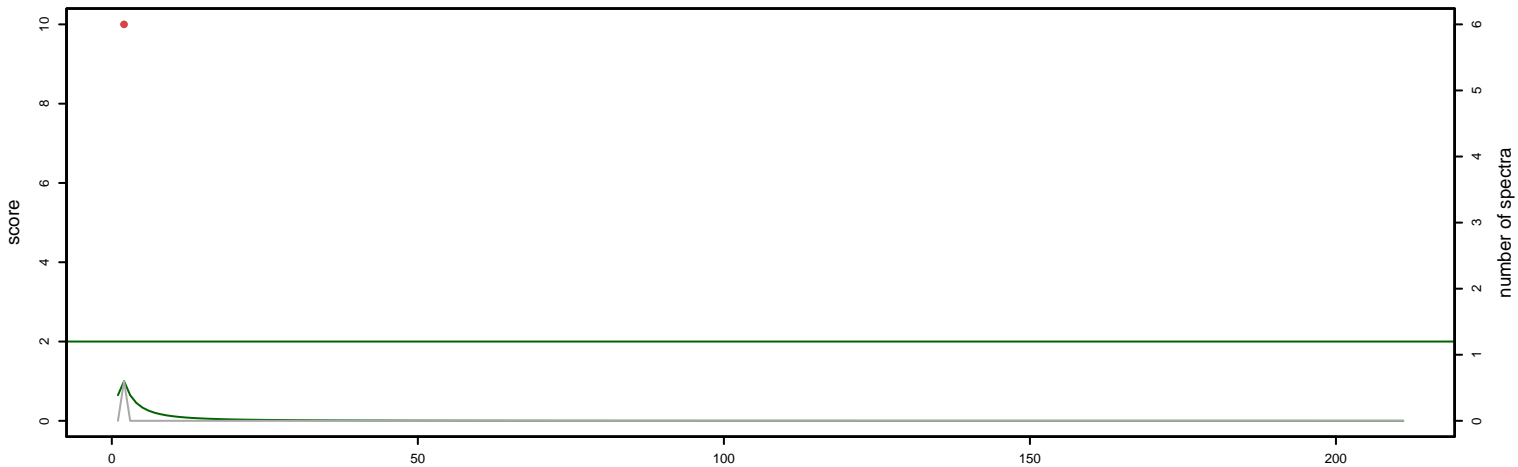

replica

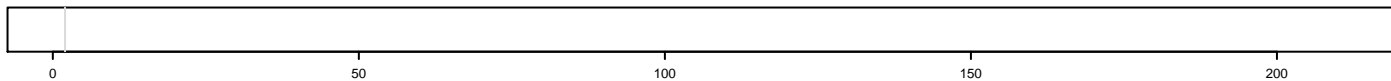

stability

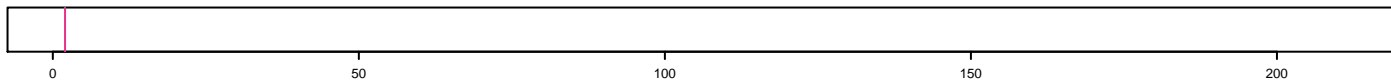

# L-lactate dehydrogenase A chain (P00338)

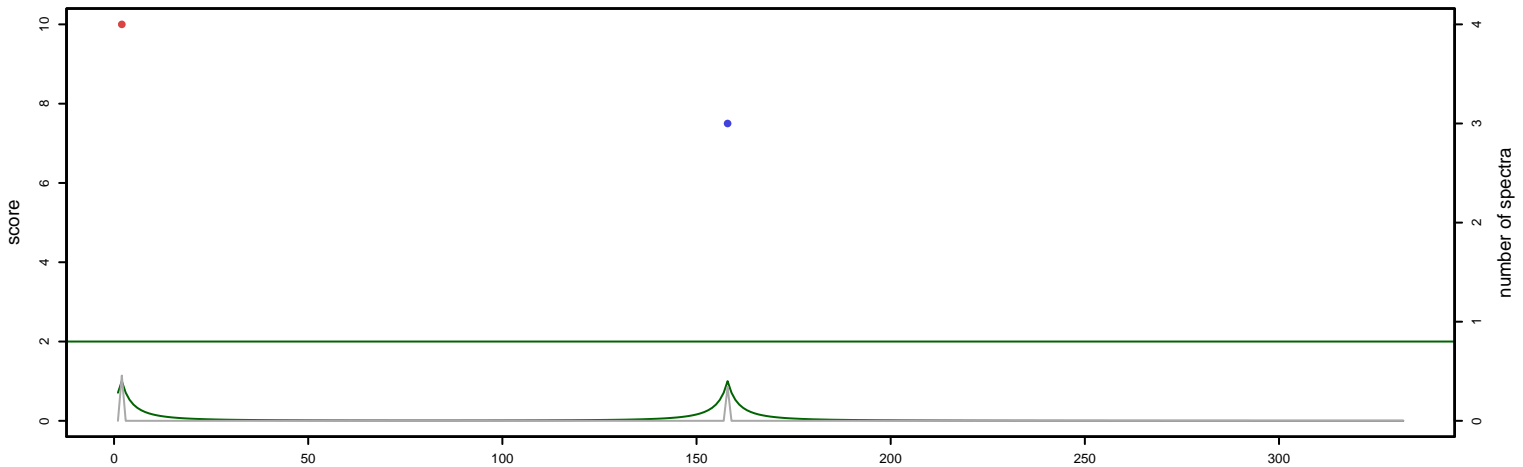

replica

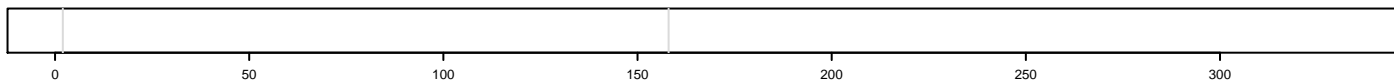

stability

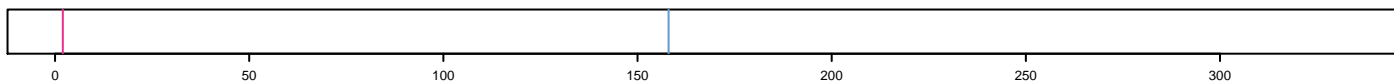

# Retinal dehydrogenase 1 (P00352)

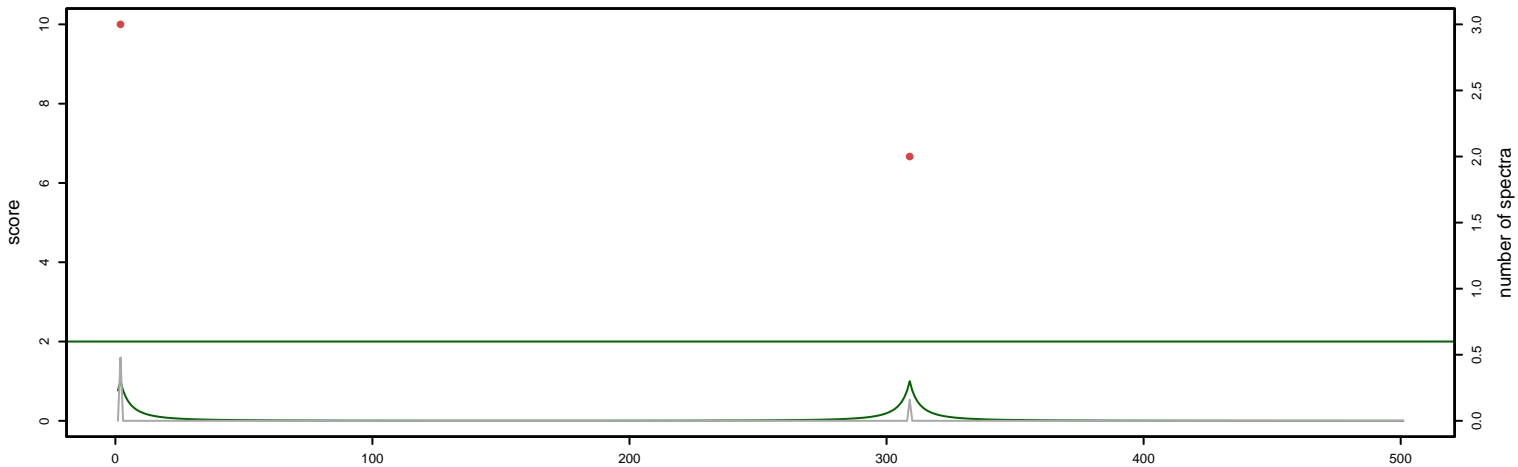

replica

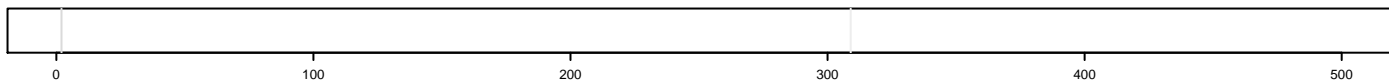

stability

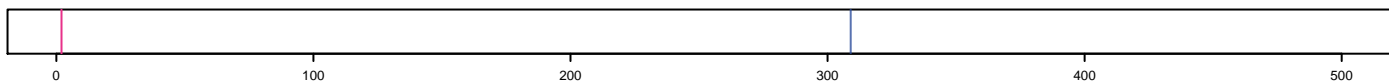

# Superoxide dismutase [Cu-Zn] (P00441)

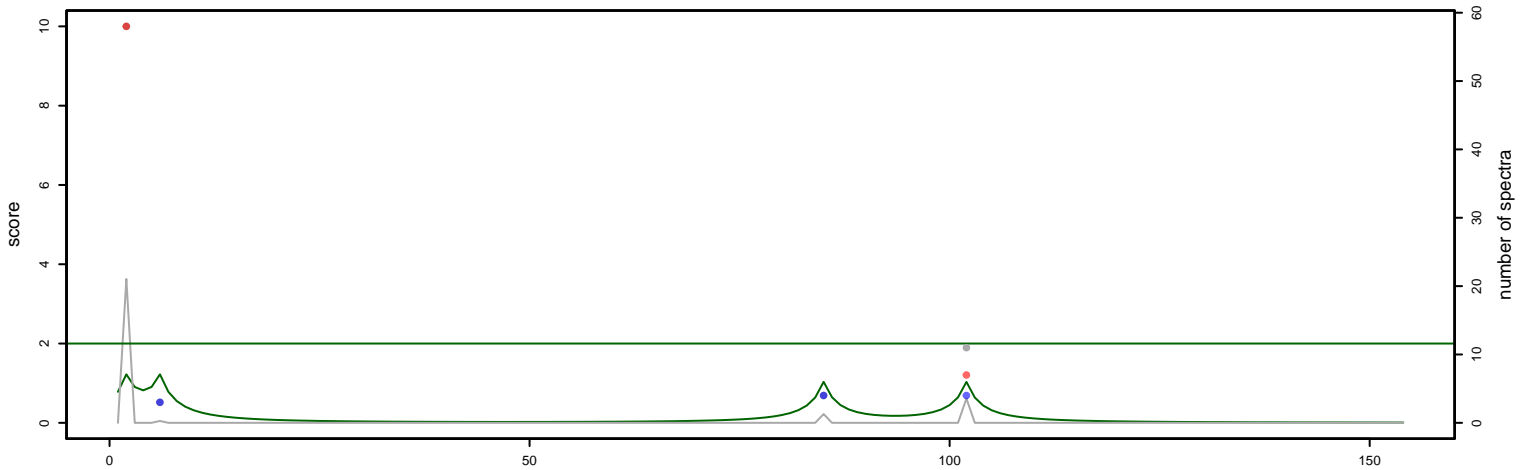

replica

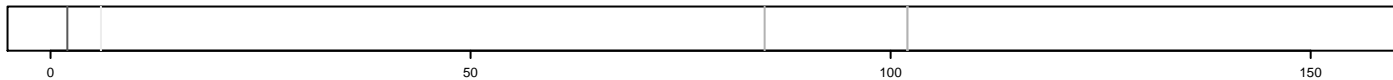

stability

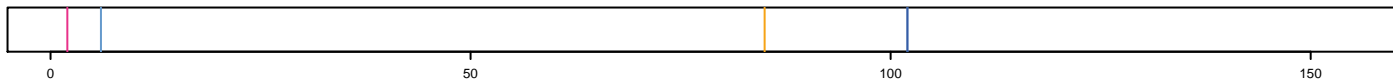

# Purine nucleoside phosphorylase (P00491)

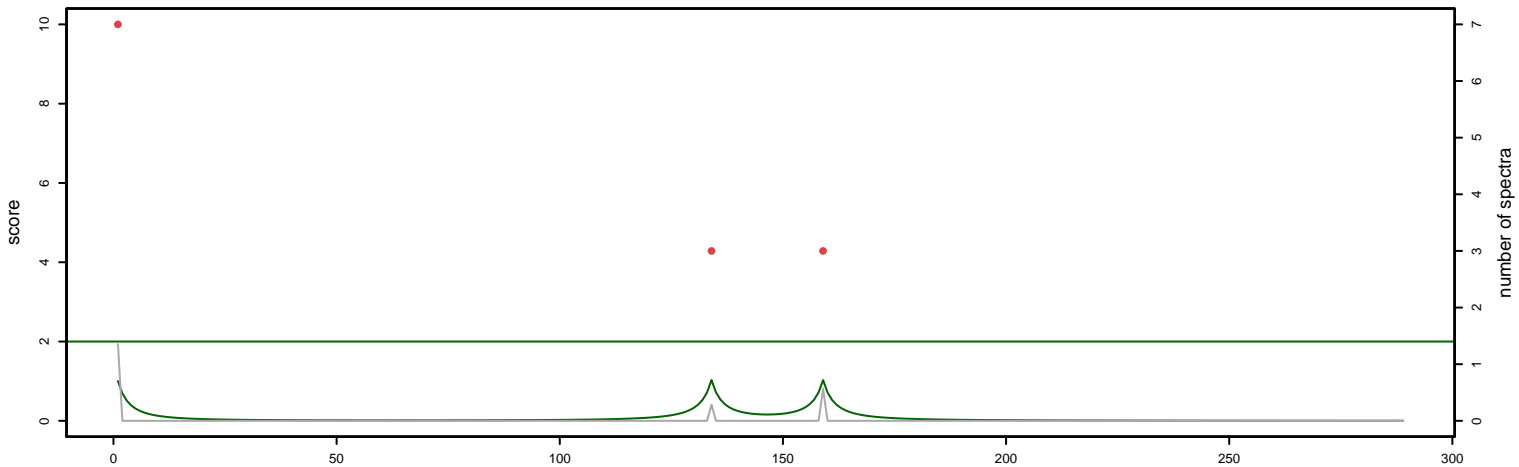

replica

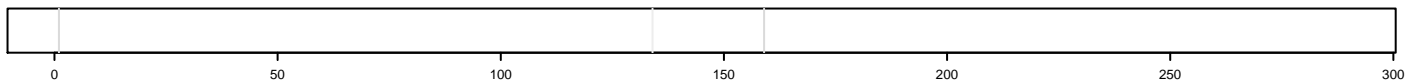

stability

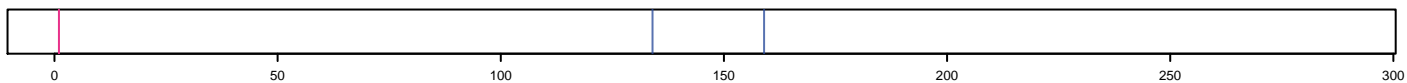



### Hypoxanthine-guanine phosphoribosyltransferase (P00492)

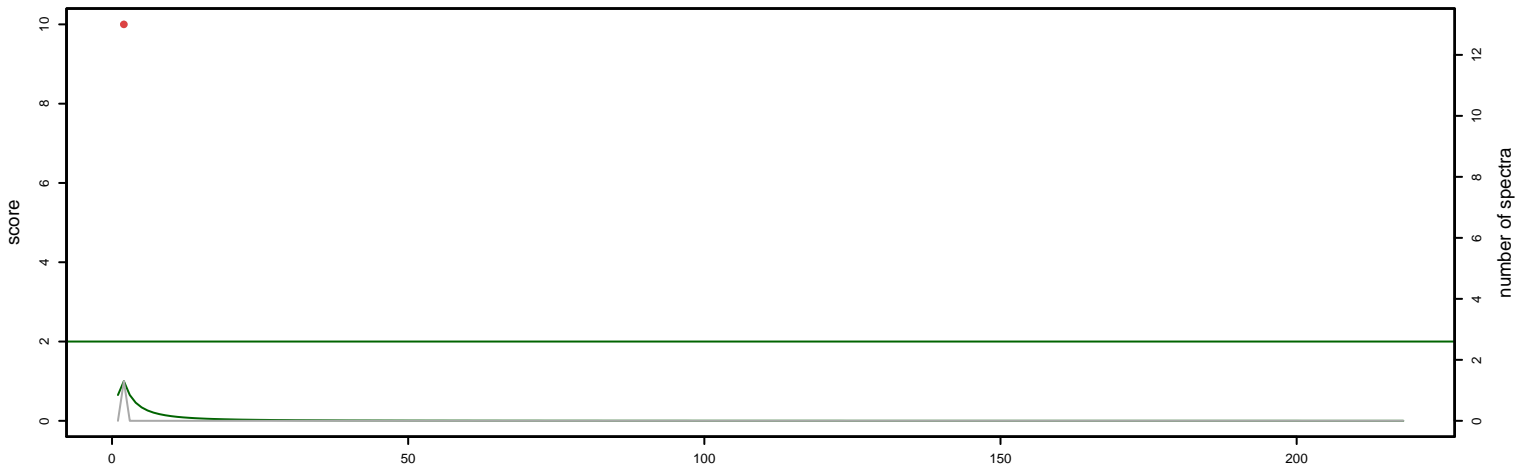

replica

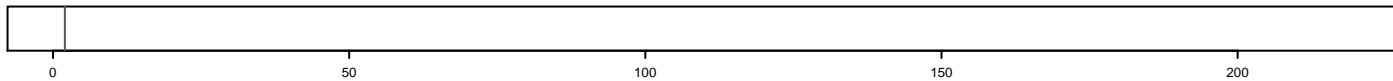

stability

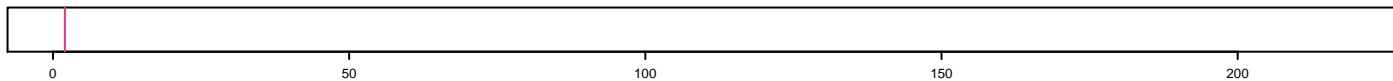

# Phosphoglycerate kinase 1 (P00558)

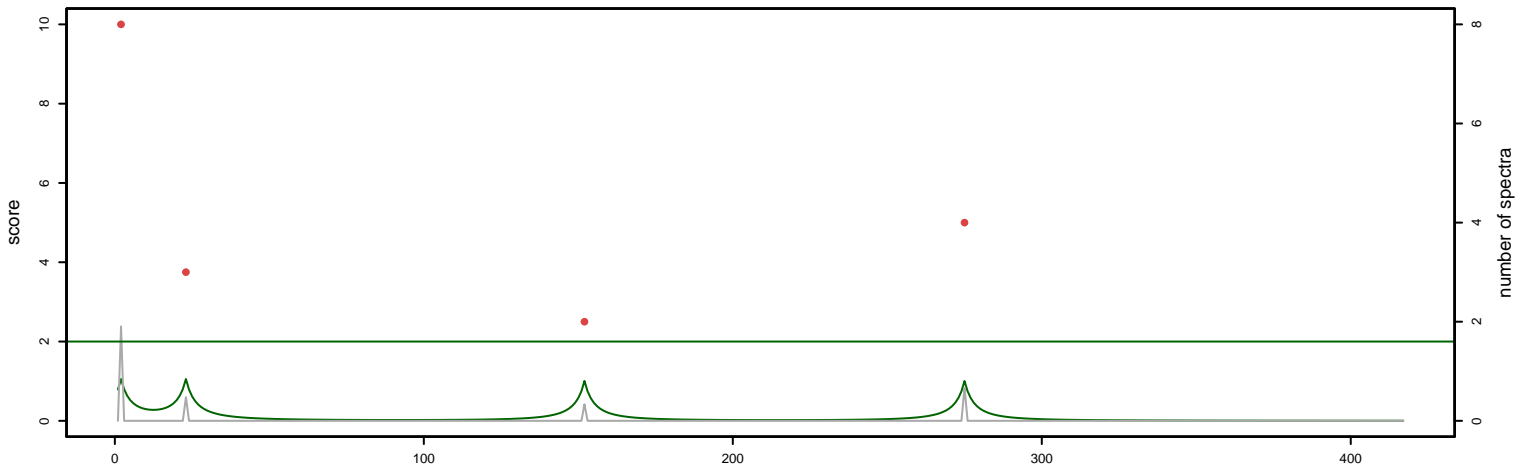

replica

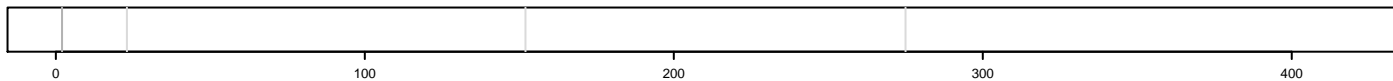

stability

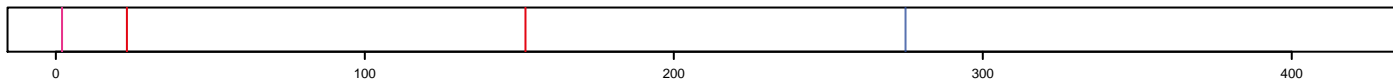

# Adenylate kinase isoenzyme 1 (P00568)

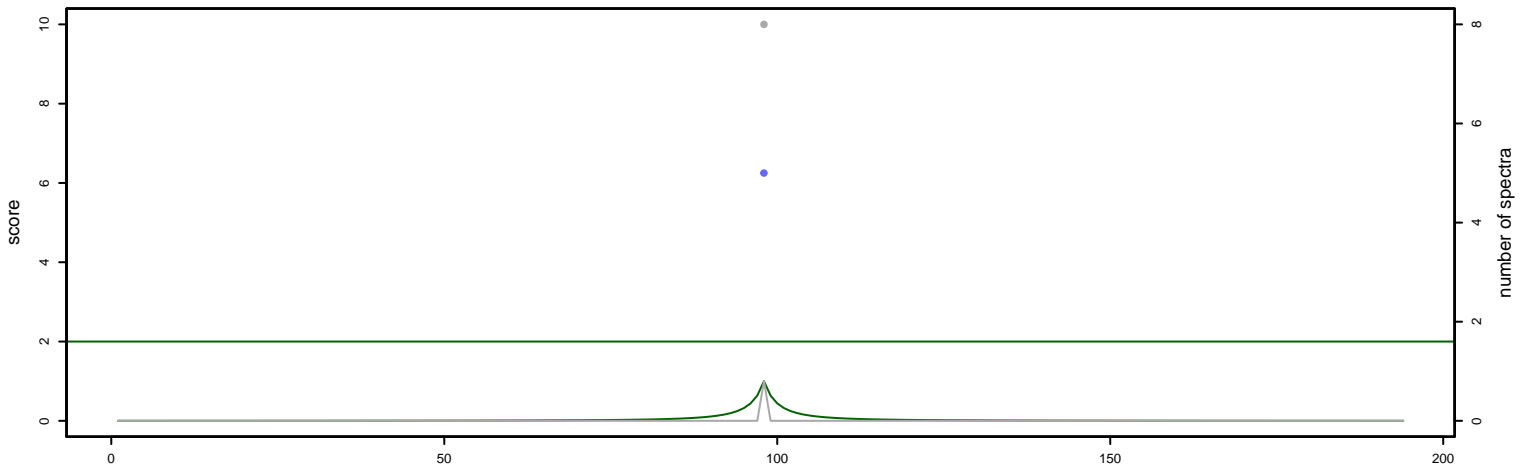

replica

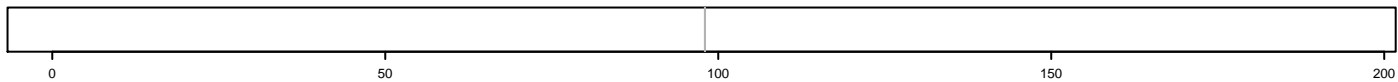

stability

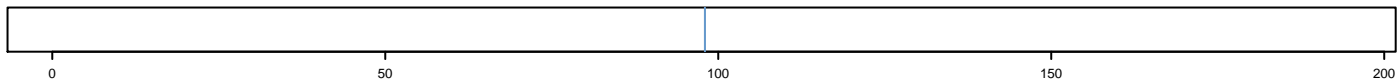

# Carbonic anhydrase 1 (P00915)

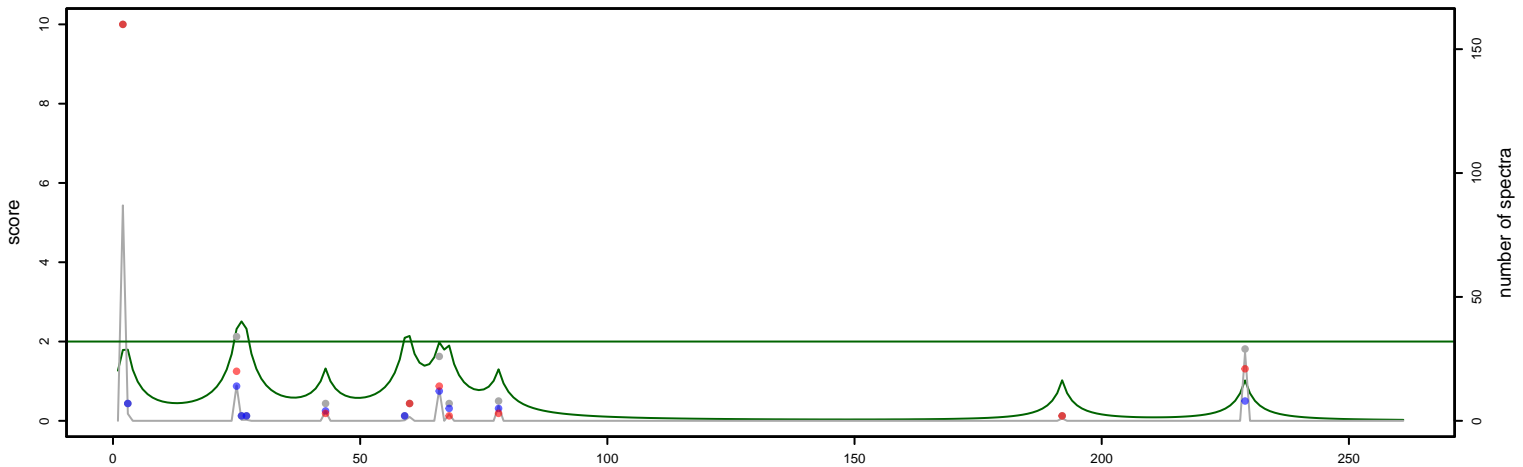

## replica

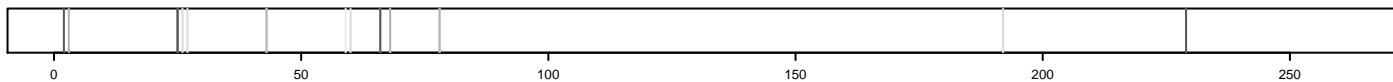

## stability

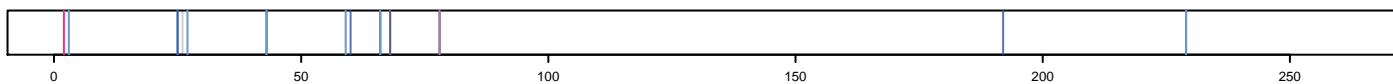

# Carbonic anhydrase 2 (P00918)

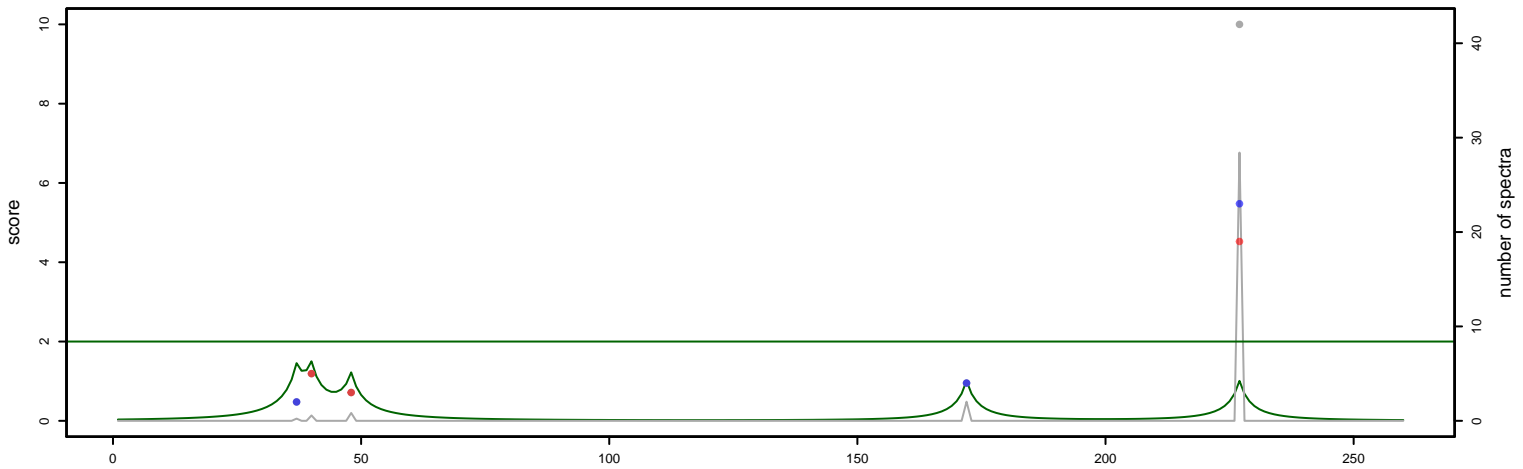

replica

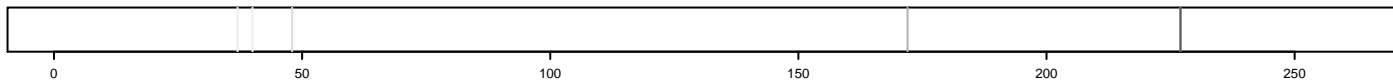

stability

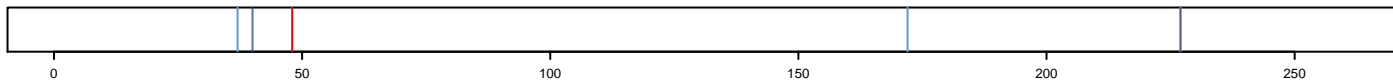

# Ig kappa chain V-III region SIE (P01620)

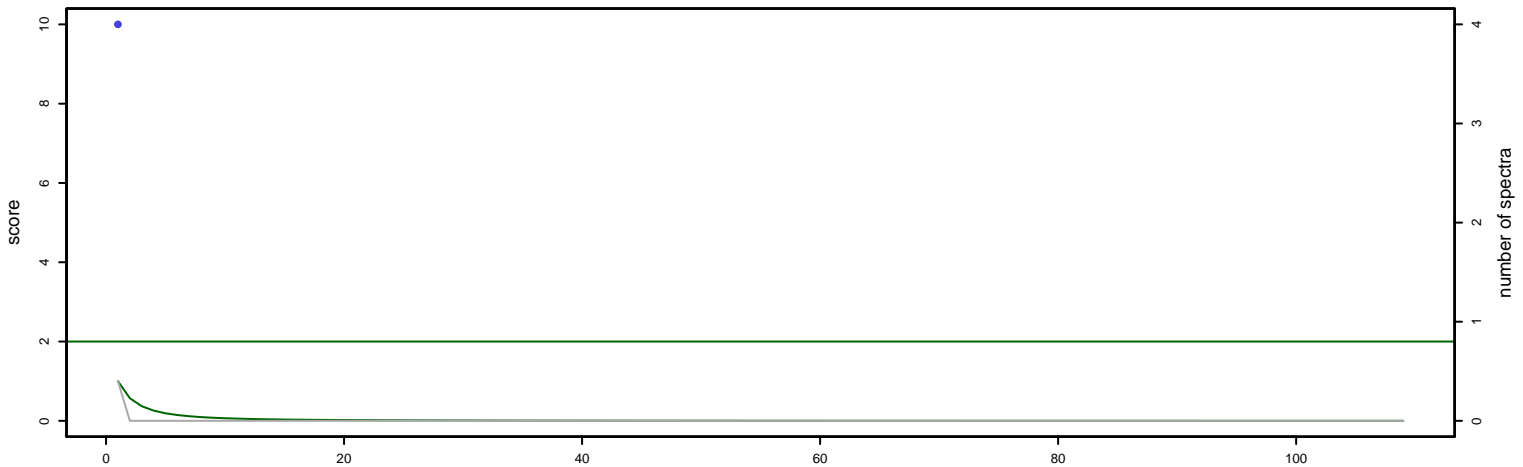

replica

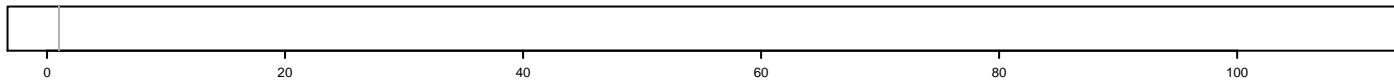

stability

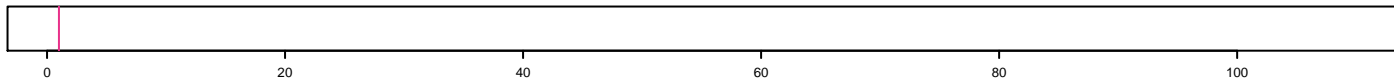

### Ig kappa chain V-IV region Len (P01625)

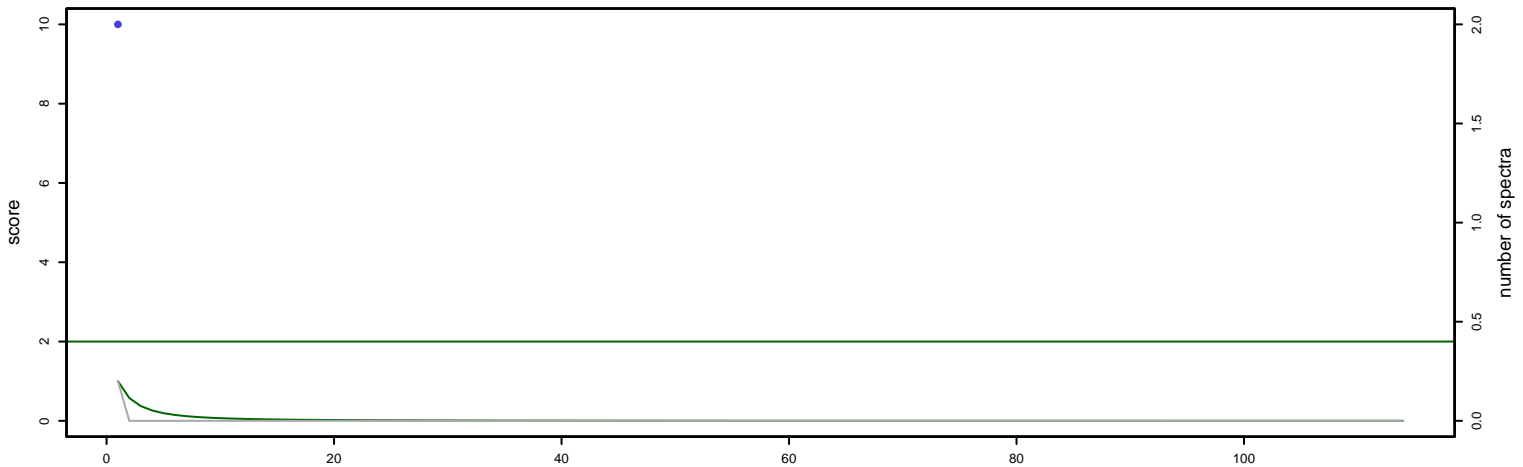

replica

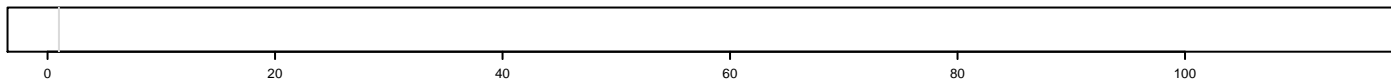

stability

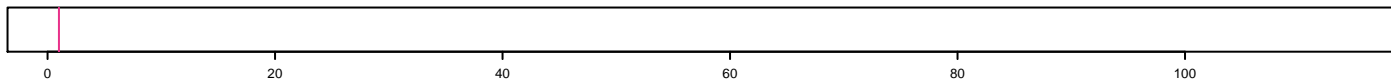

# Hemoglobin subunit delta (P02042)

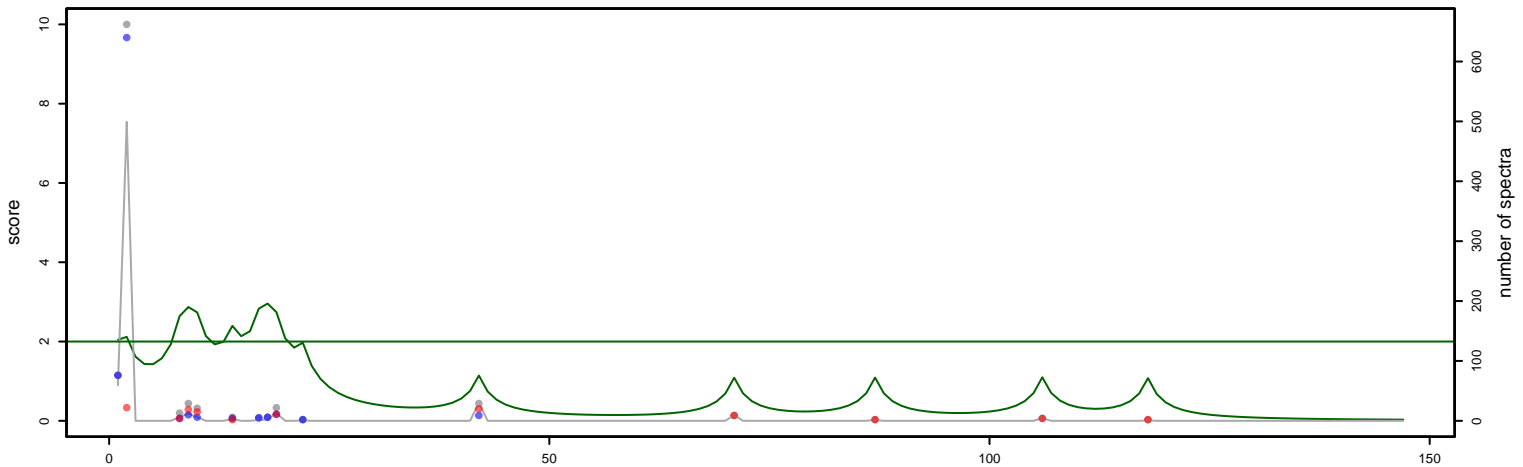

## replica

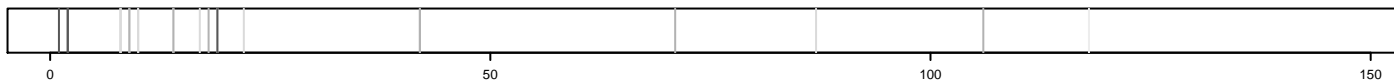

## stability

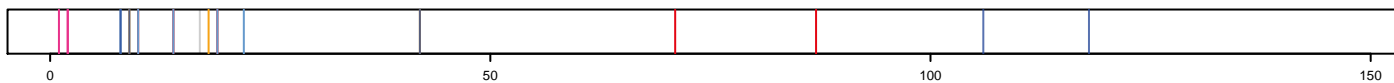



# Hemoglobin subunit epsilon (P02100)

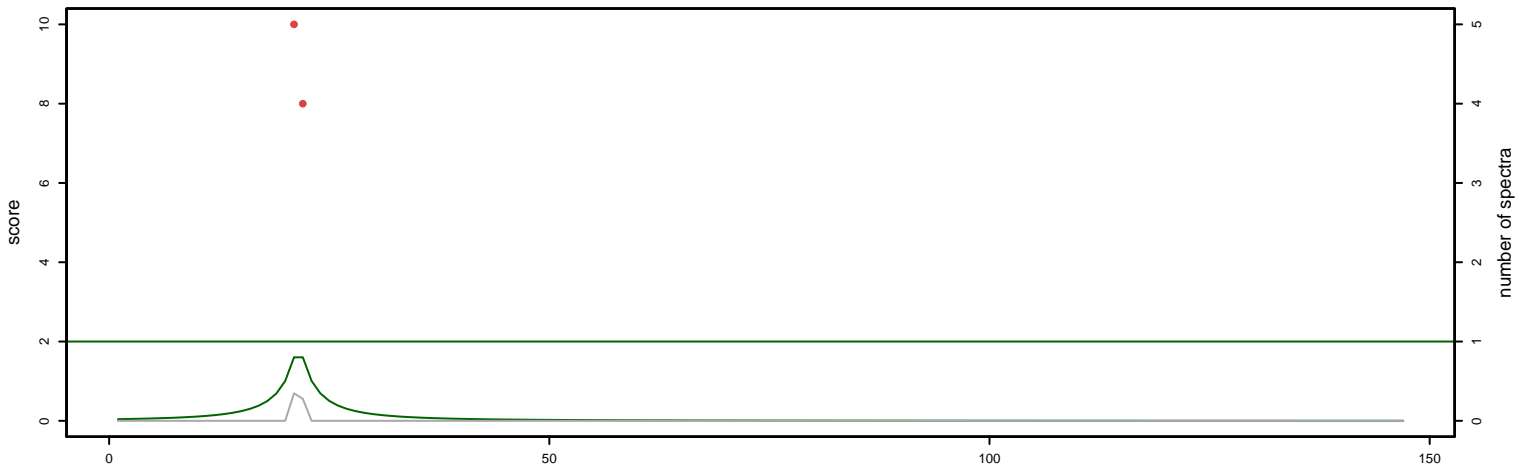

replica

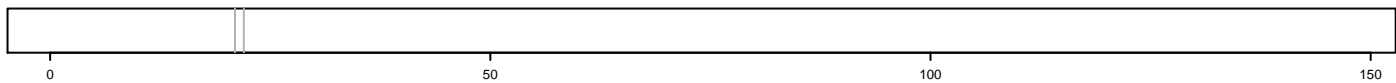

stability

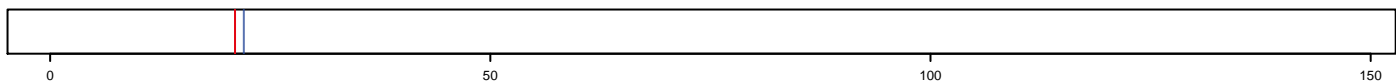

### Spectrin alpha chain, erythrocytic 1 (P02549)

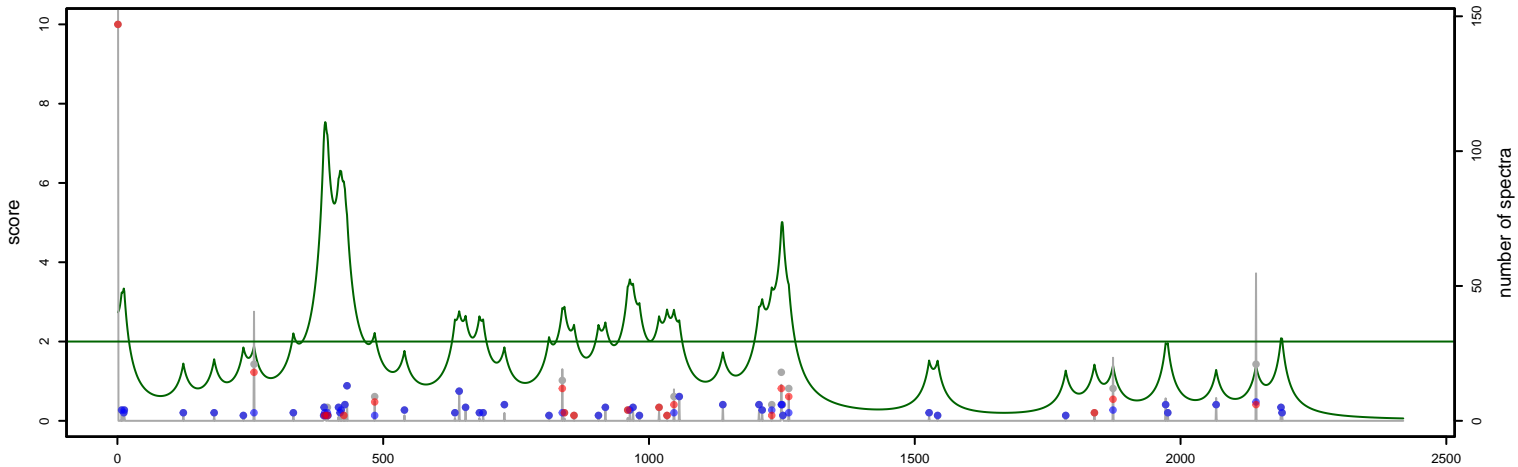

#### replica

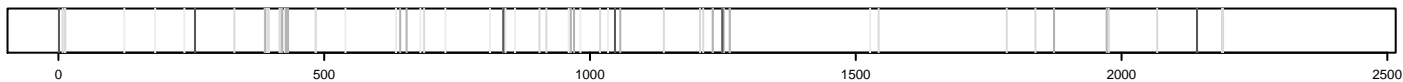

#### stability

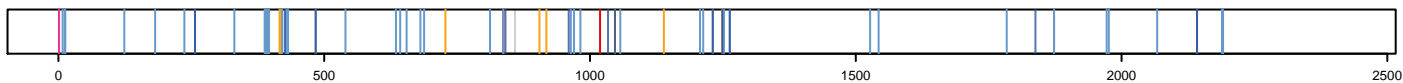

### Fibrinogen alpha chain (P02671)

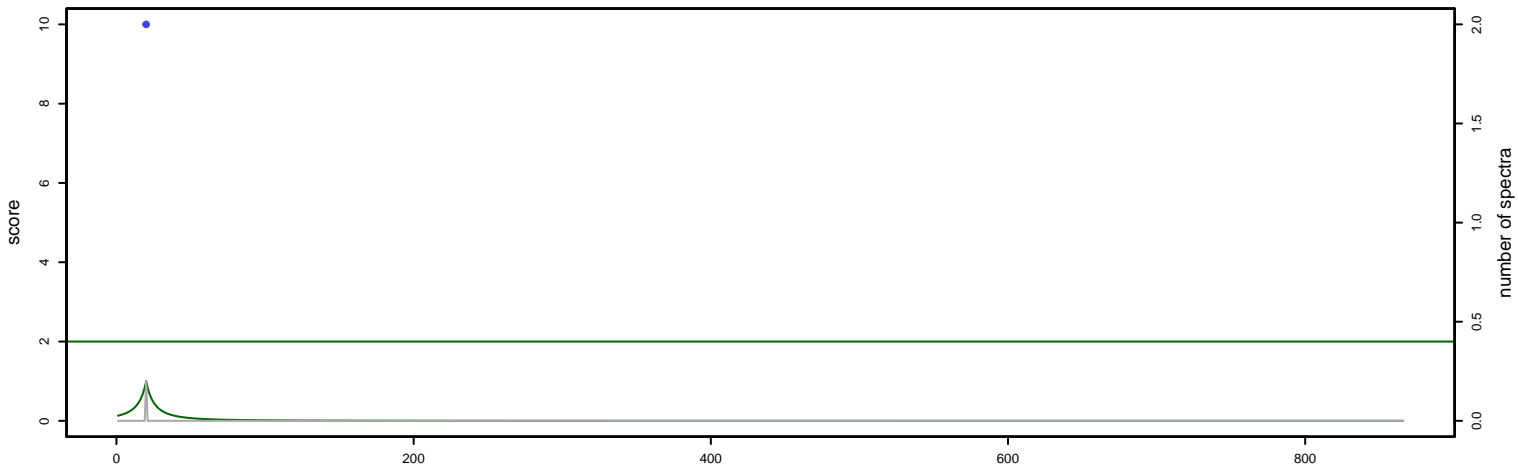

replica

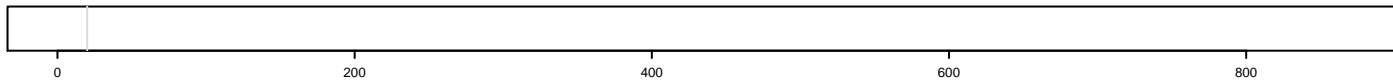

stability

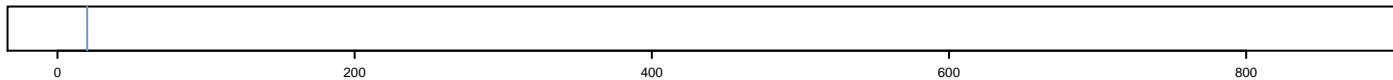

### Band 3 anion transport protein (P02730)

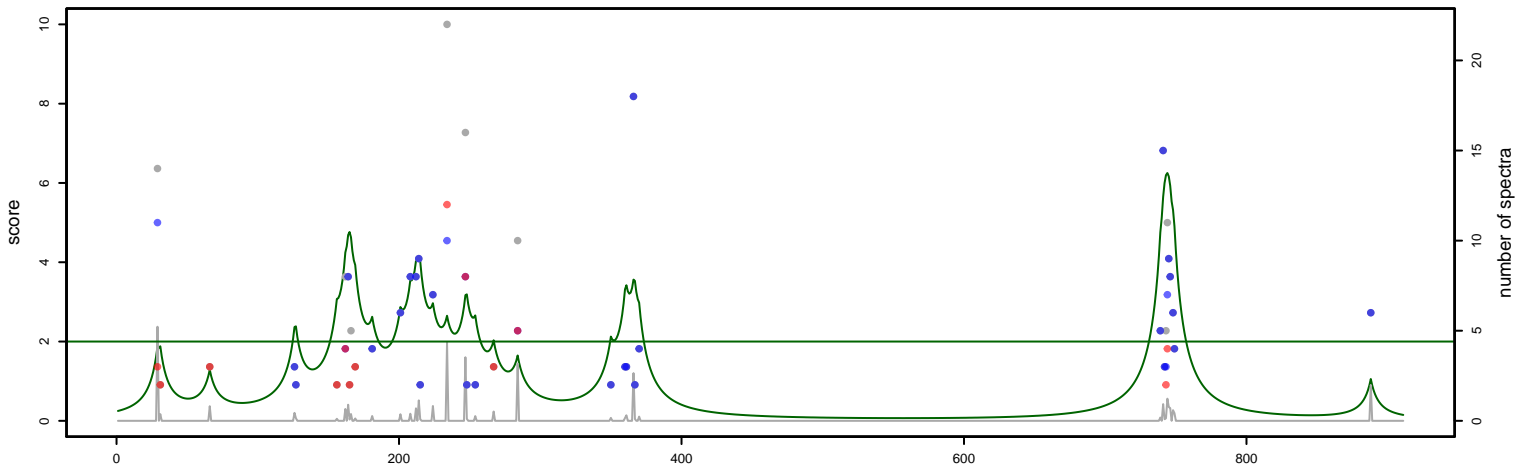

replica

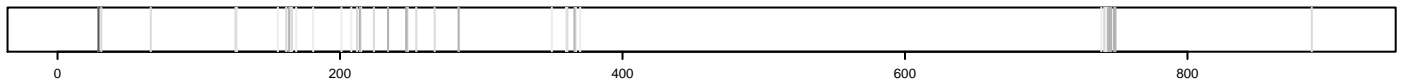

stability

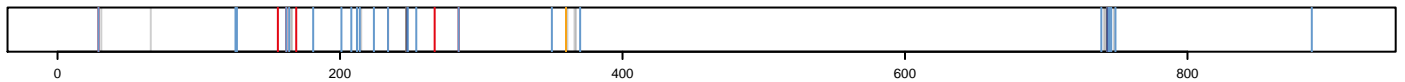

# Ferritin heavy chain (P02794)

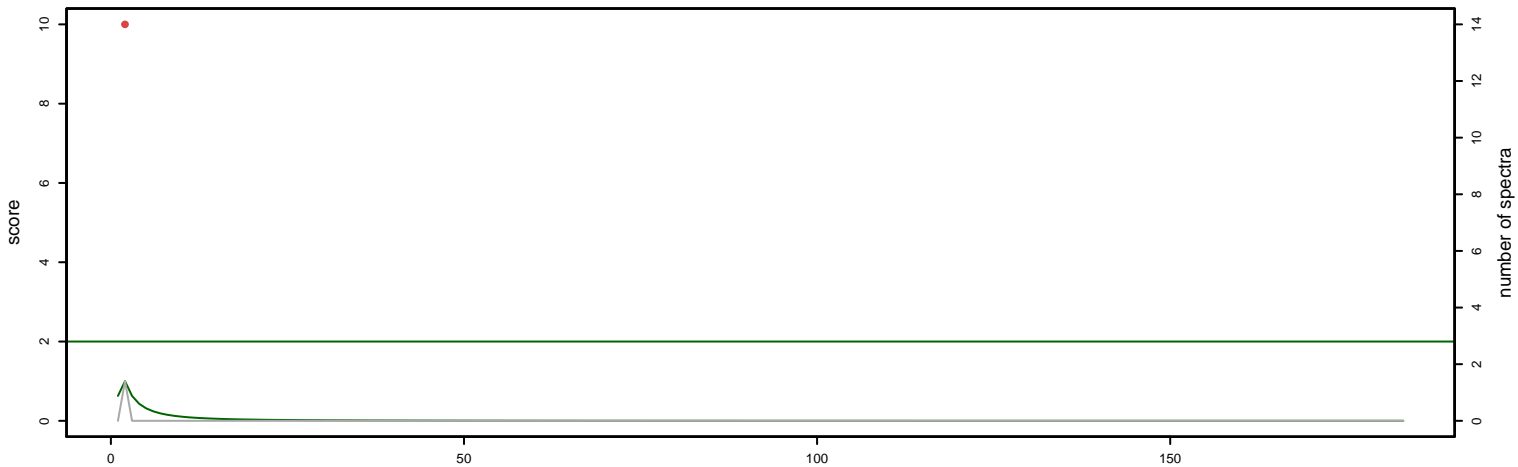

replica

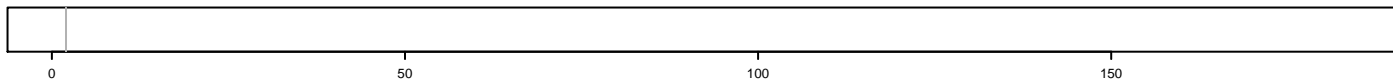

stability

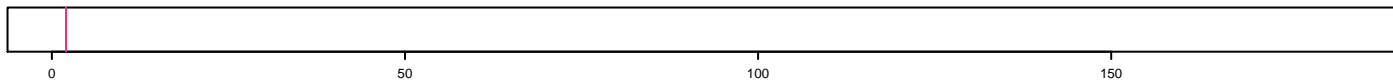

### Catalase (P04040)

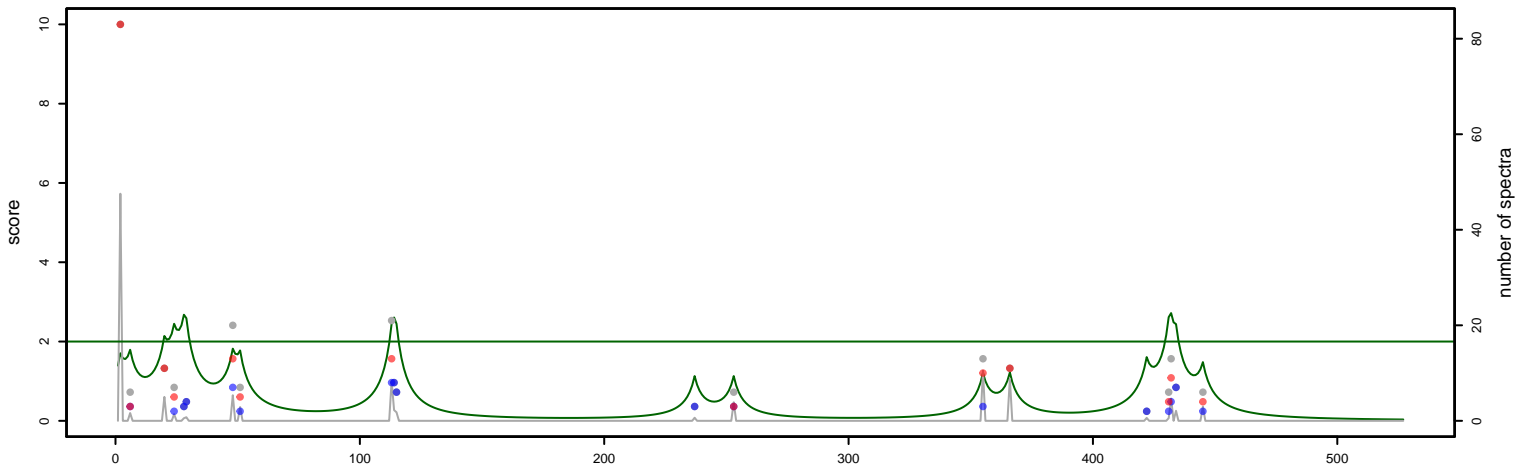

### replica

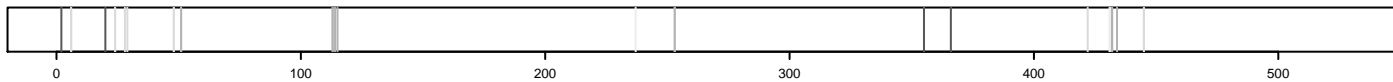

### stability

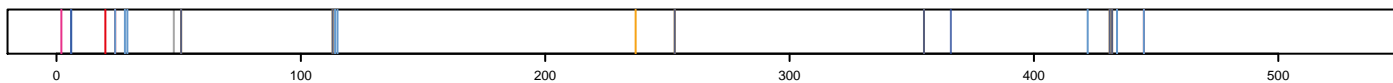

# Fructose-bisphosphate aldolase A (P04075)

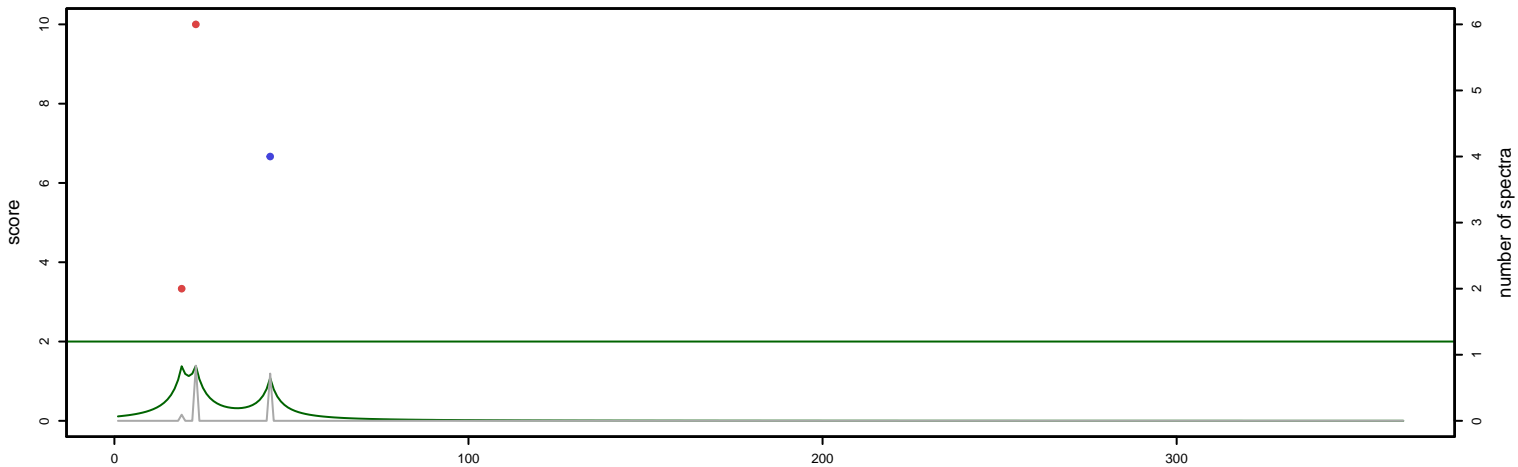

replica

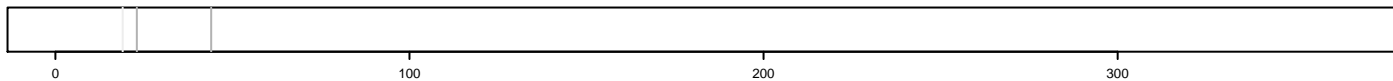

stability

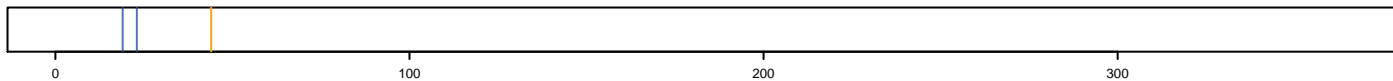

# Cystatin-B (P04080)

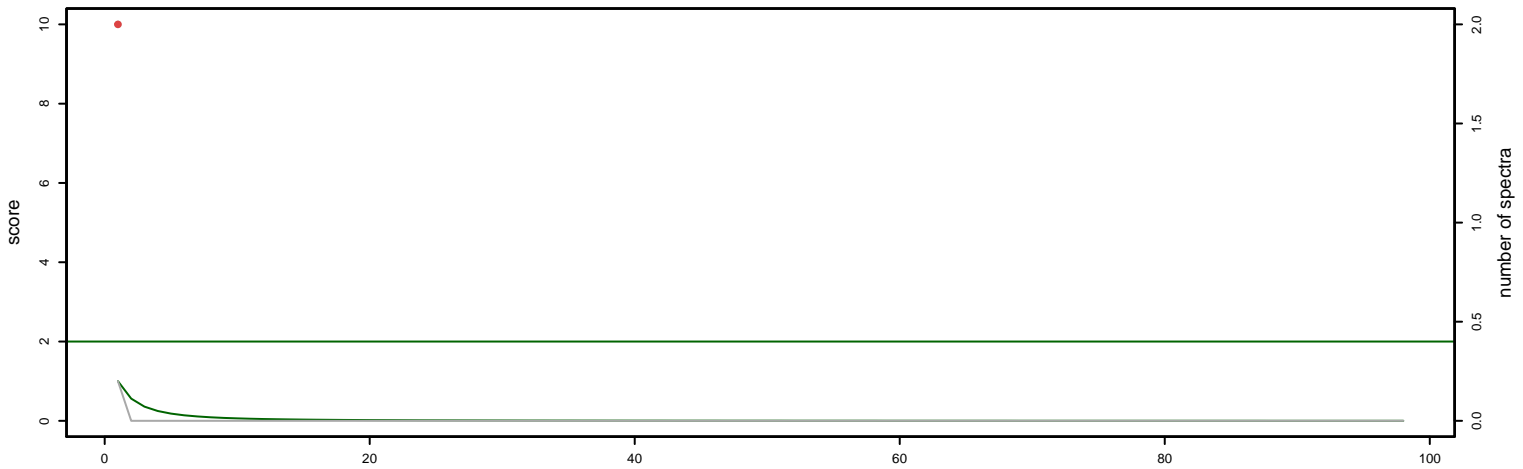

replica

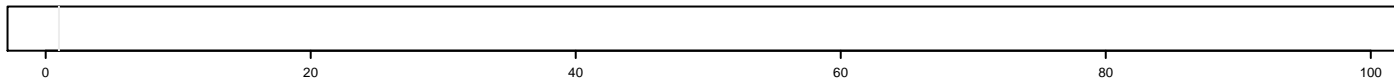

stability

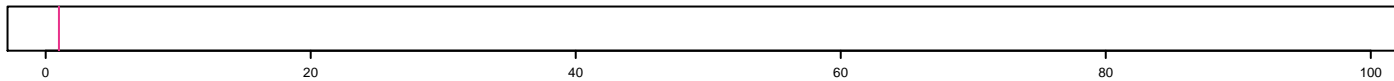



### Glyceraldehyde-3-phosphate dehydrogenase (P04406)

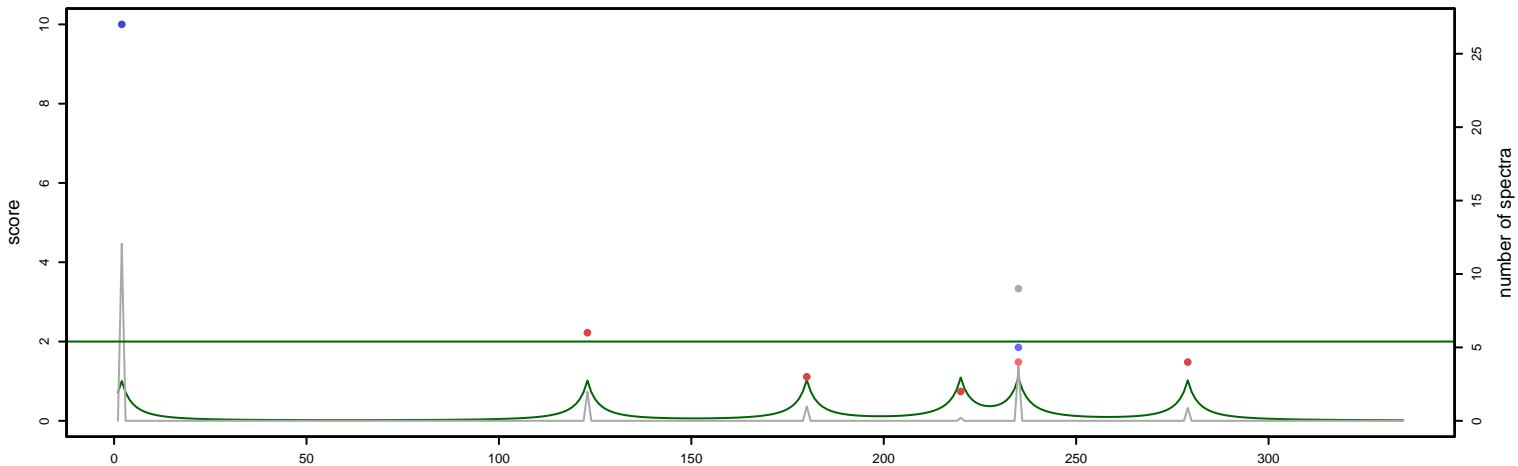

replica

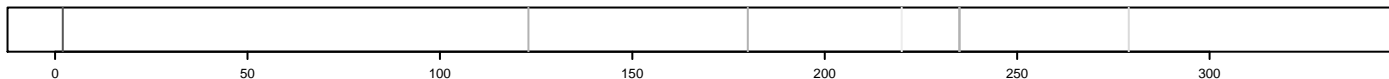

stability

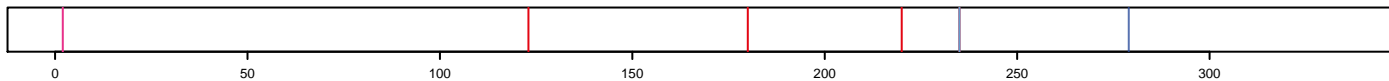

### Calpain small subunit 1 (P04632)

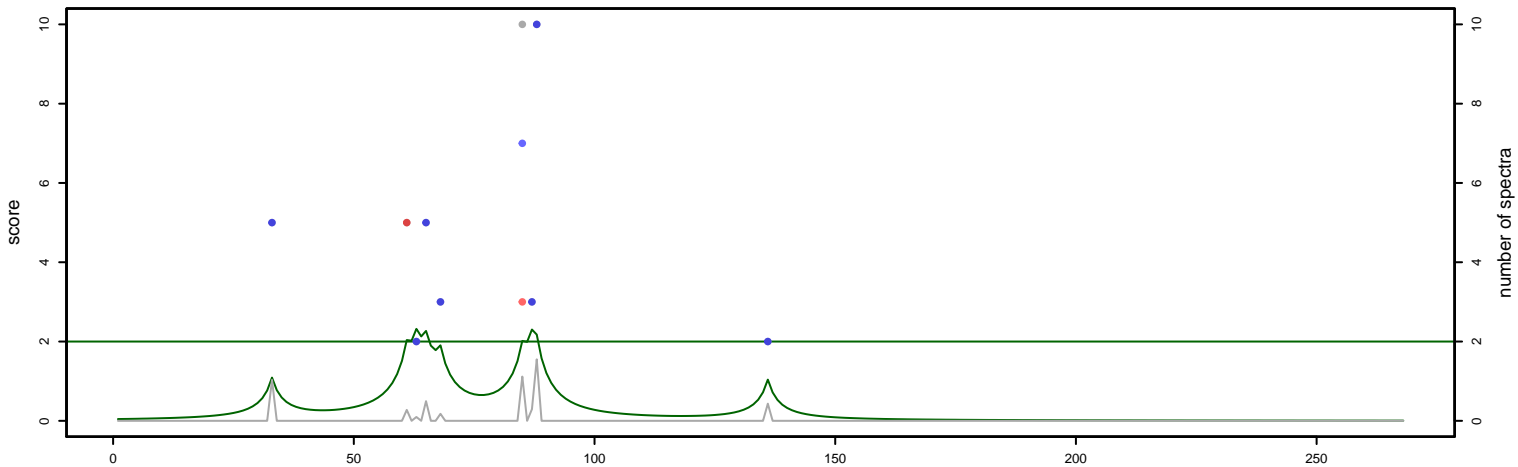

### replica

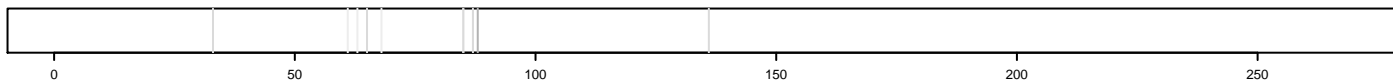

### stability

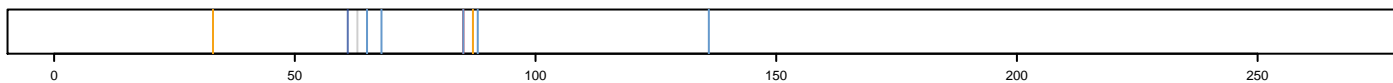

### Glycophorin-C (P04921)

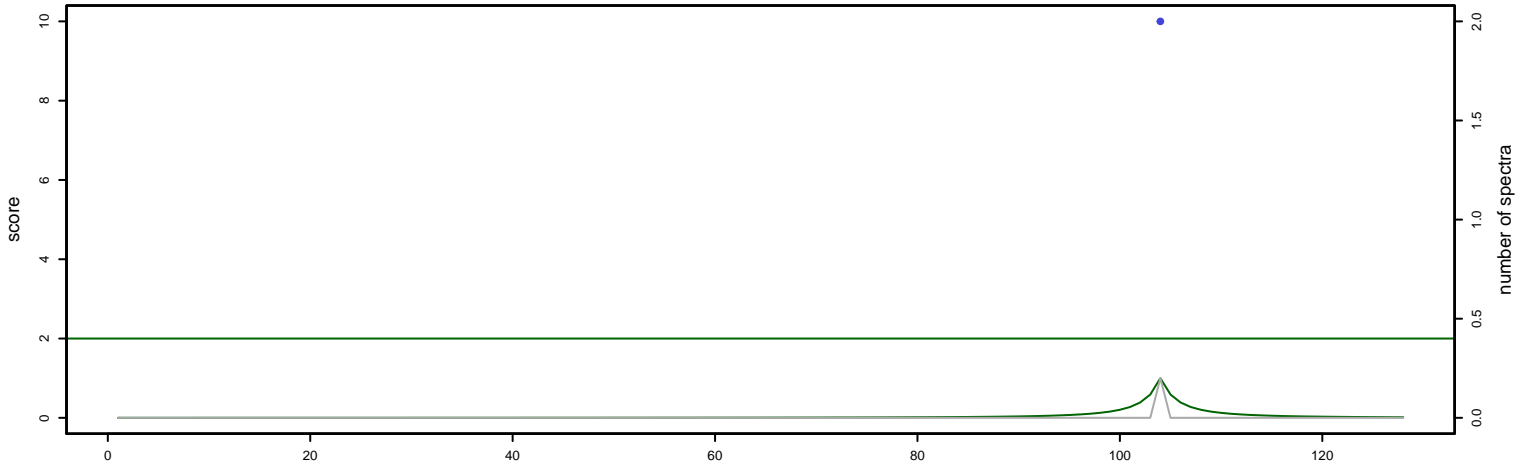

replica

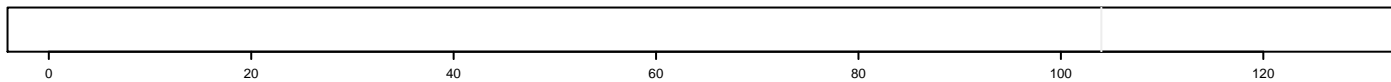

stability

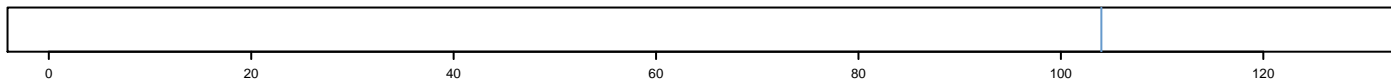

# Uroporphyrinogen decarboxylase (P06132)

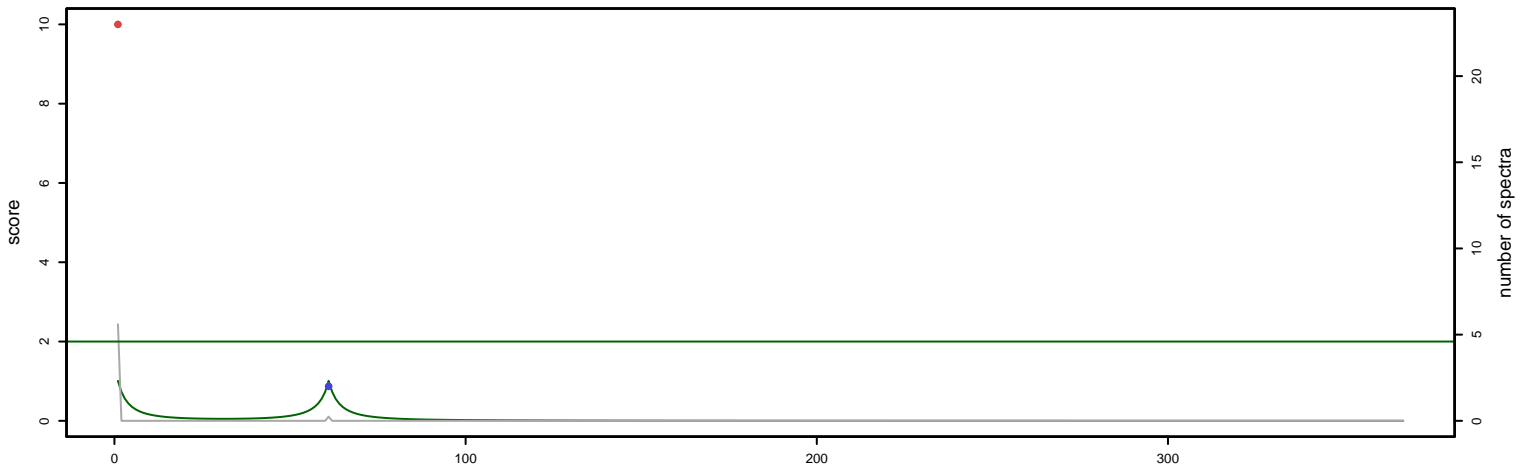

replica

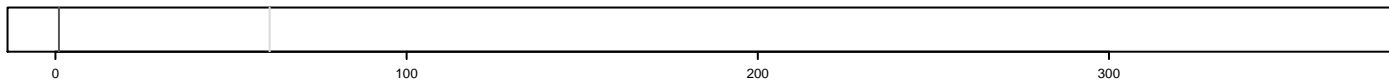

stability

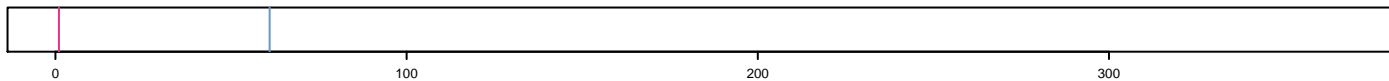

# Protein S100-A6 (P06703)

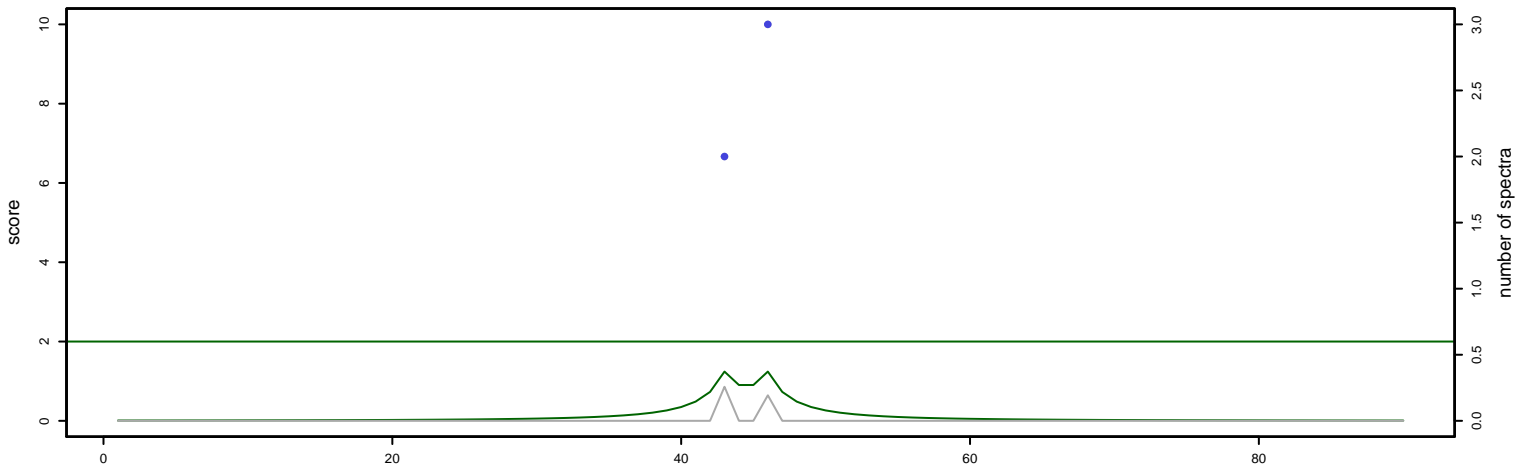

replica

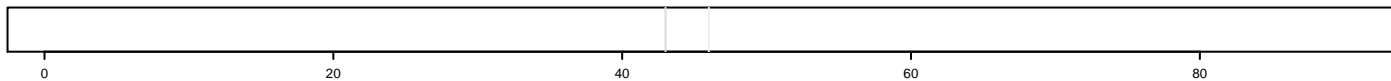

stability

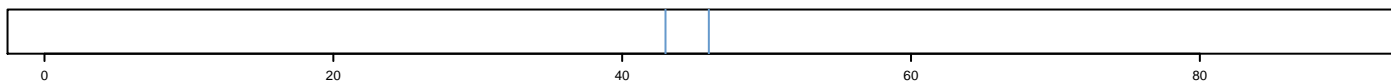

# Alpha-enolase (P06733)

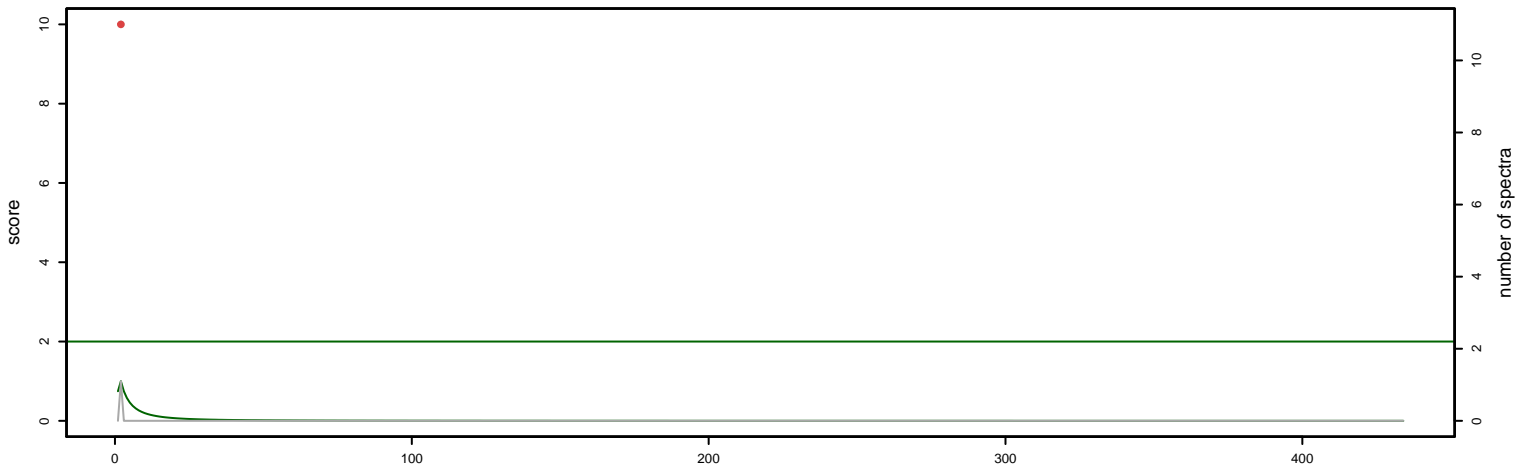

replica

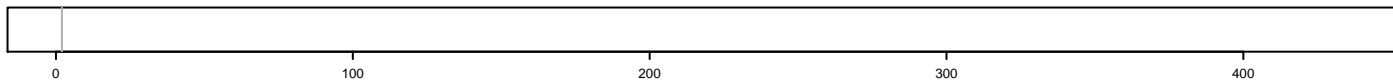

stability

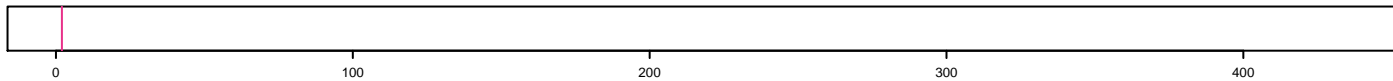

# Tropomyosin alpha-3 chain (P06753-2)

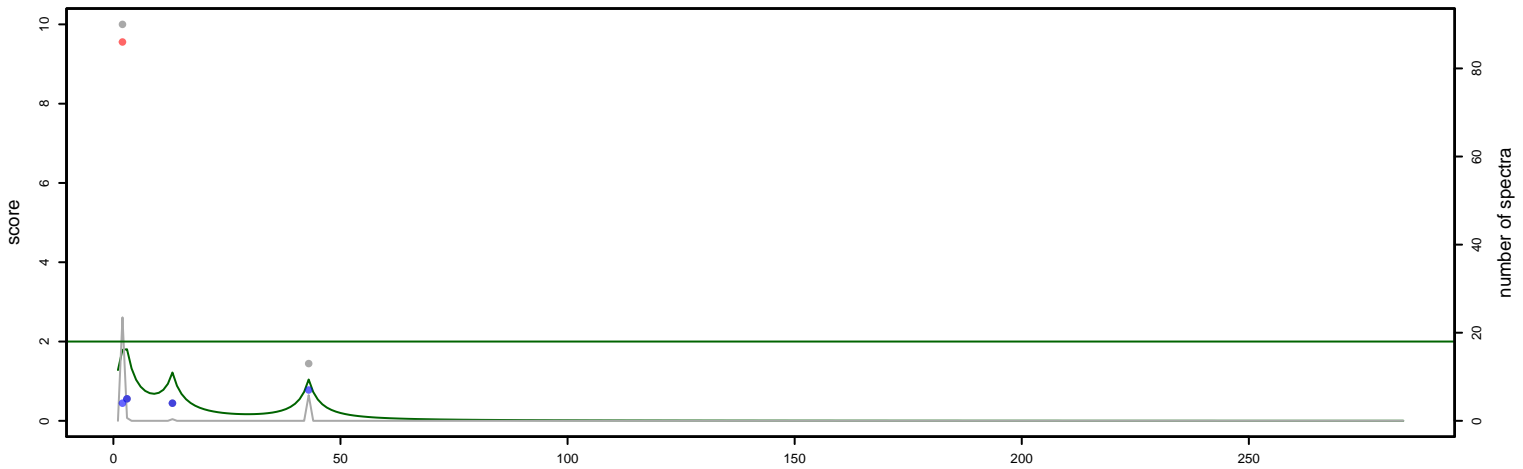

replica

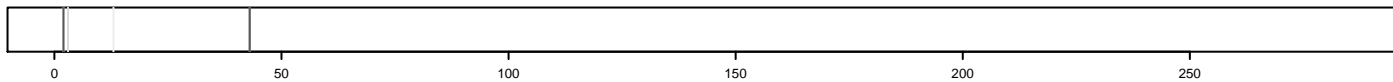

stability

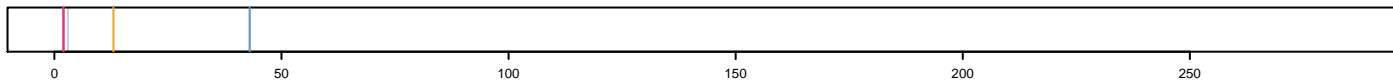

# Acyl-CoA-binding protein (P07108)

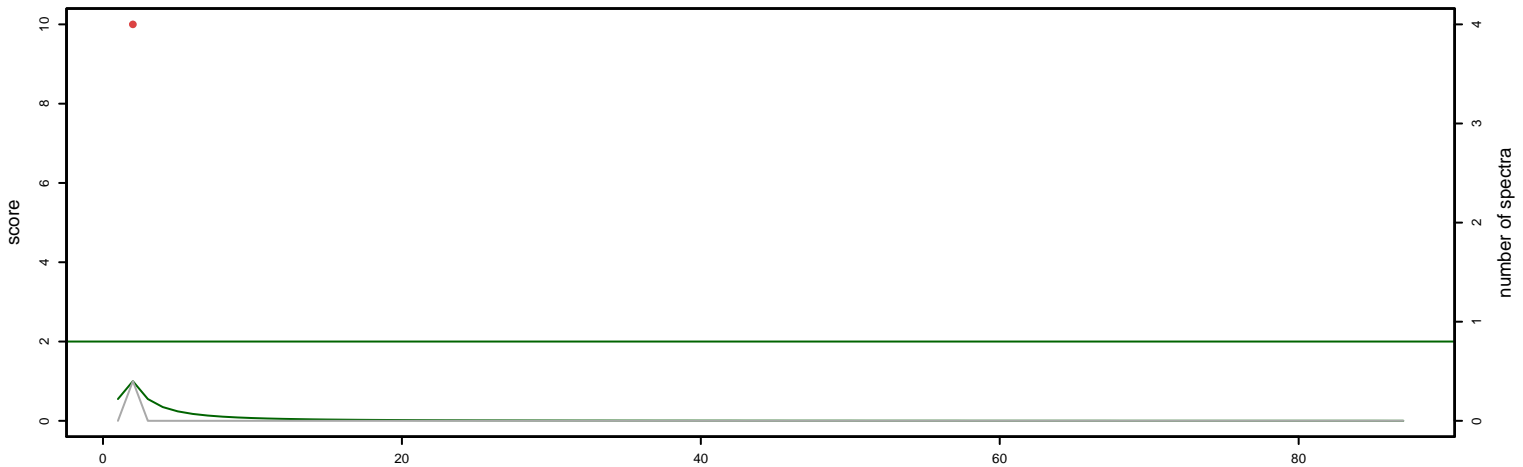

replica

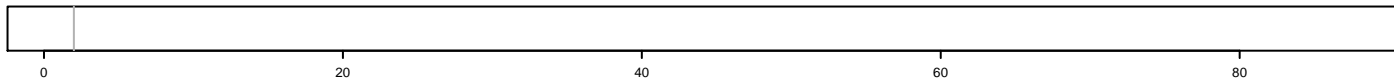

stability

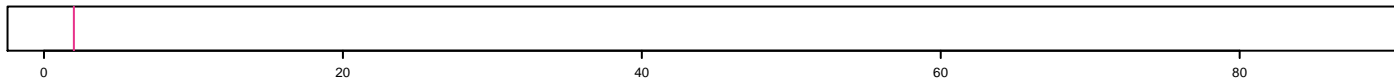



# L-lactate dehydrogenase B chain (P07195)

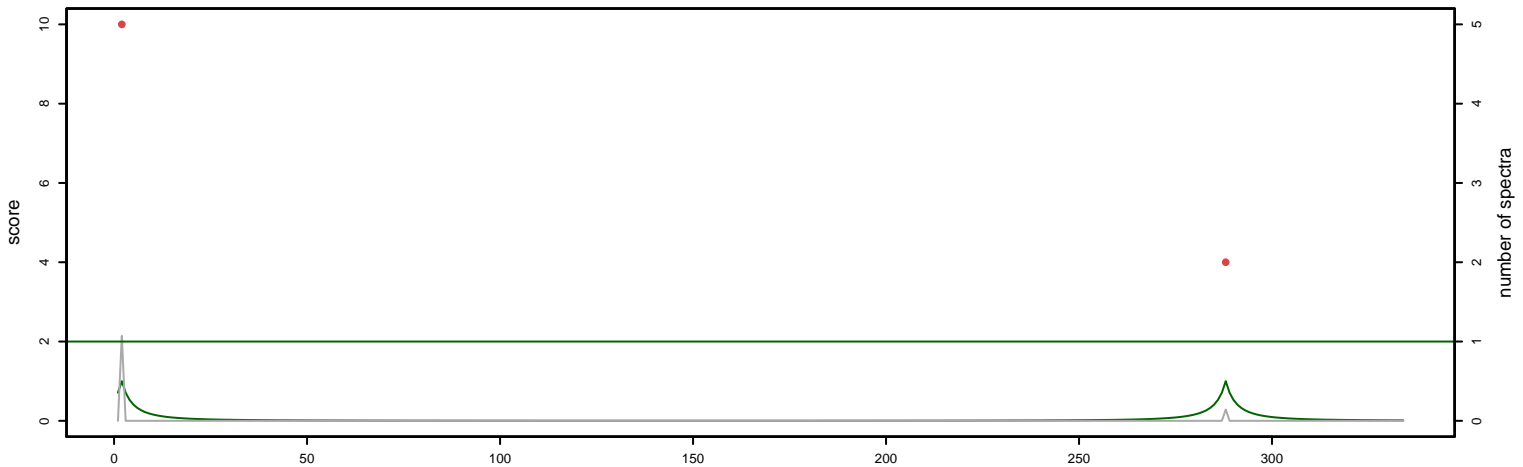

replica

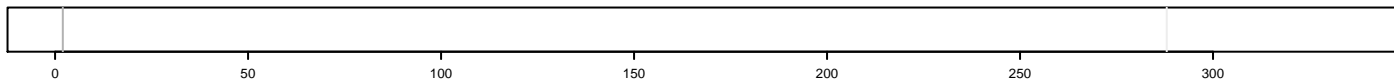

stability

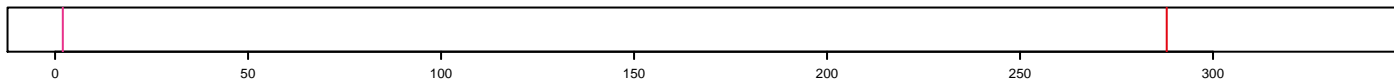

# Glutathione peroxidase 1 (P07203)

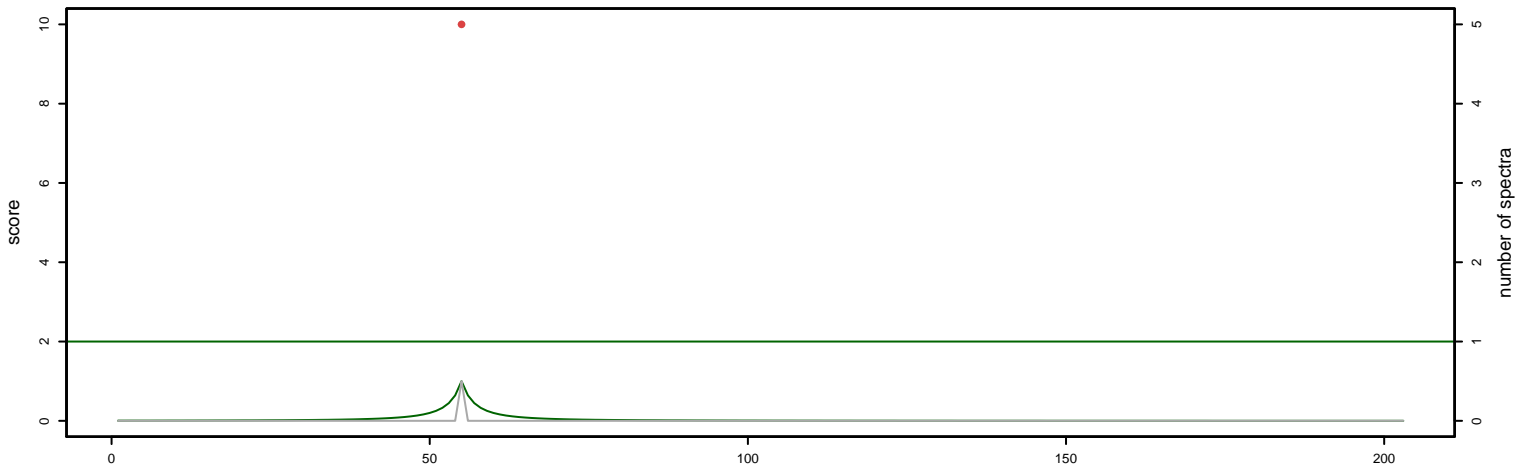

replica

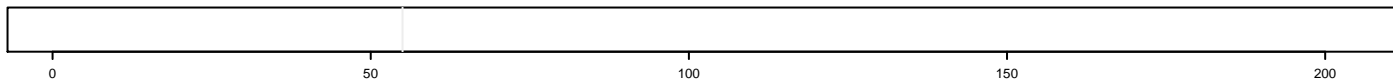

stability

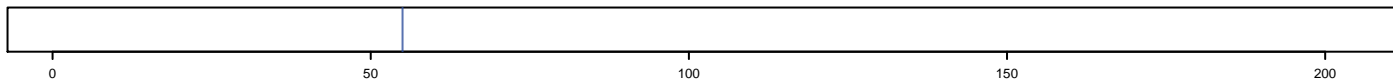

Protein disulfide-isomerase (P07237)

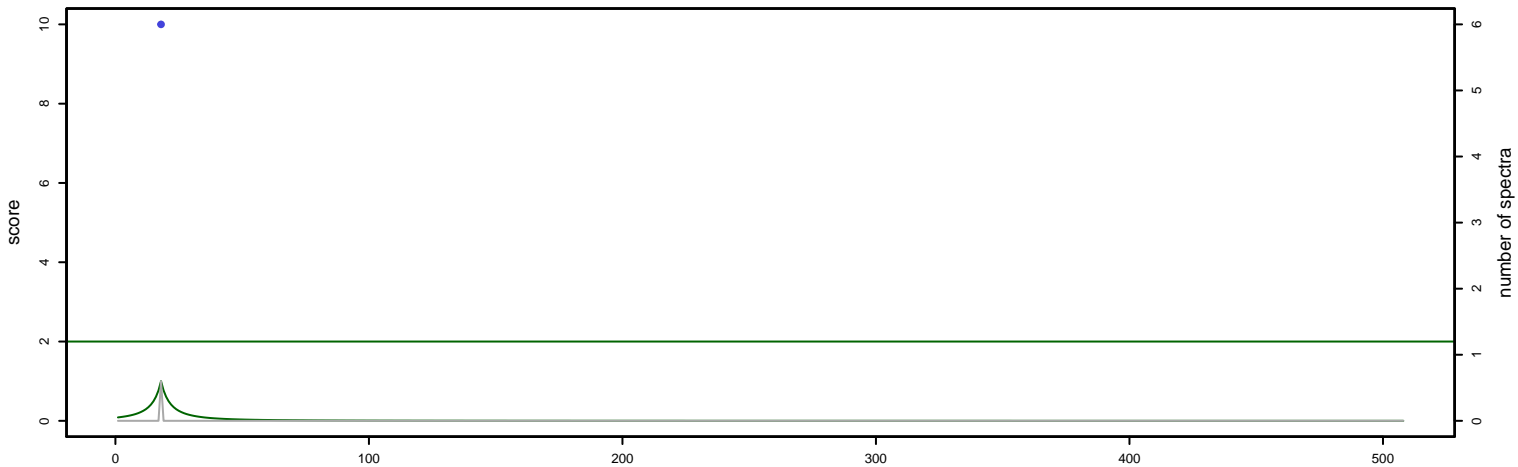

replica

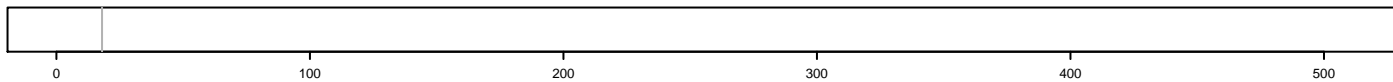

stability

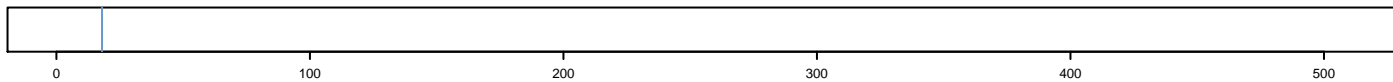

# Calpain-1 catalytic subunit (P07384)

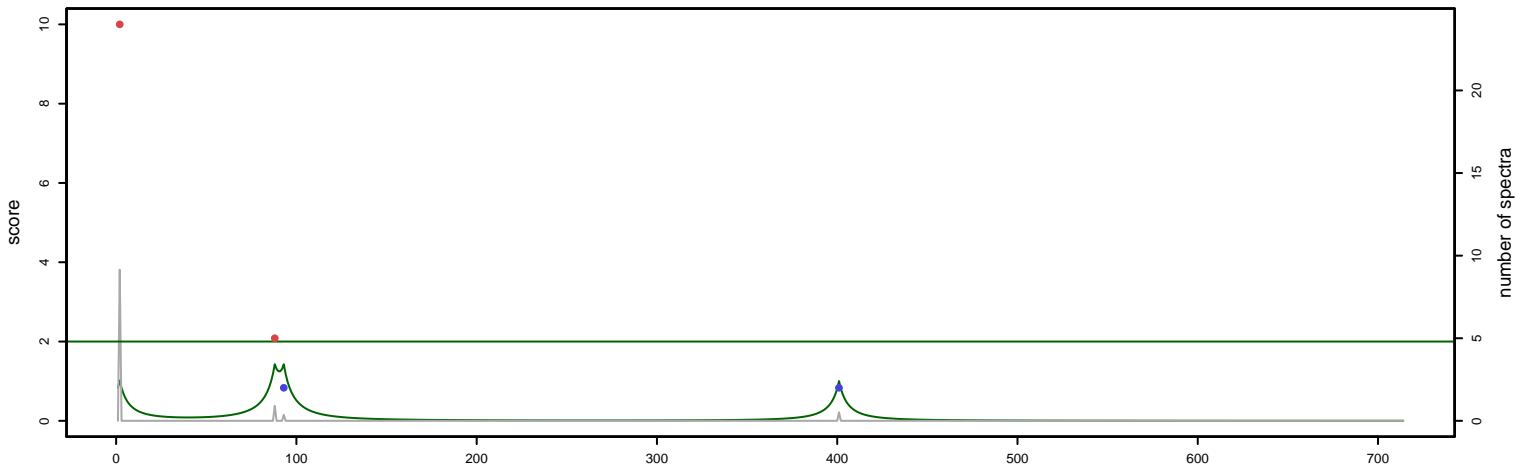

## replica

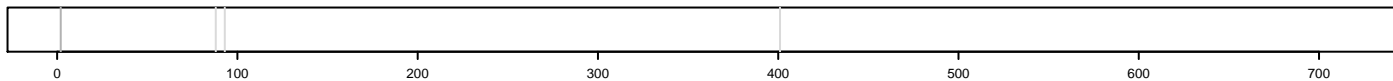

## stability

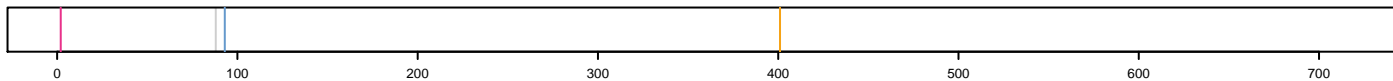

# Bisphosphoglycerate mutase (P07738)

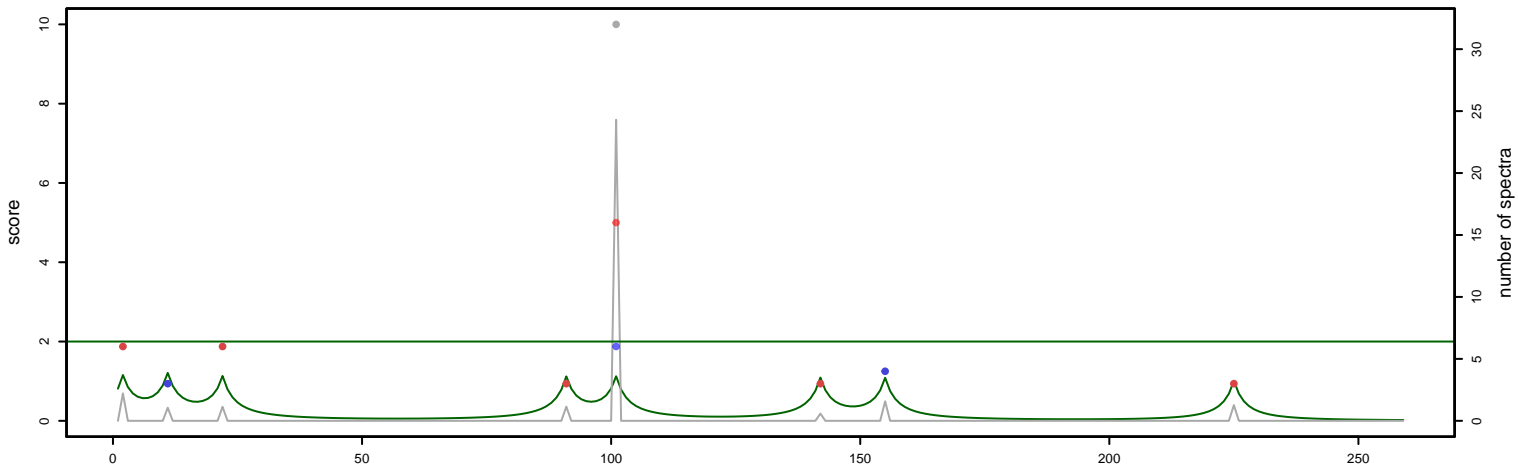

## replica

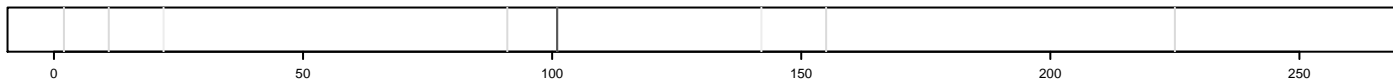

## stability

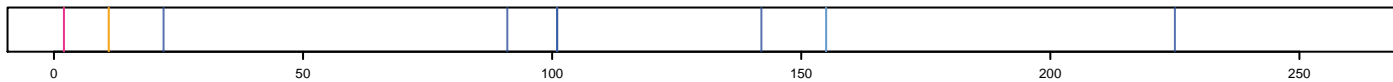

# Adenine phosphoribosyltransferase (P07741)

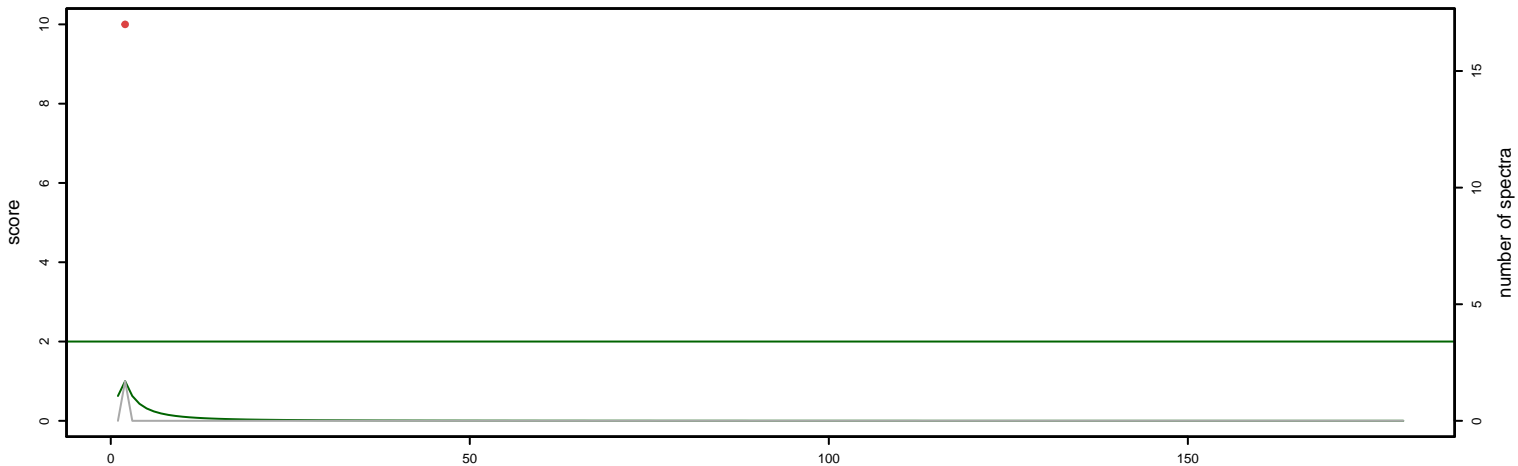

replica

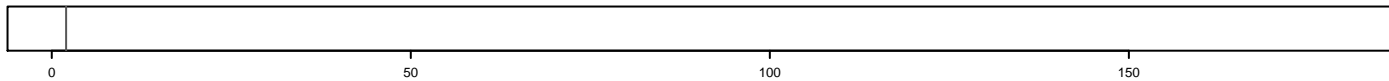

stability

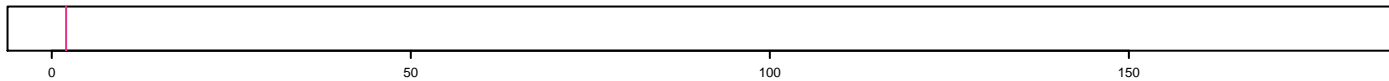

# Heat shock protein HSP 90-alpha (P07900)

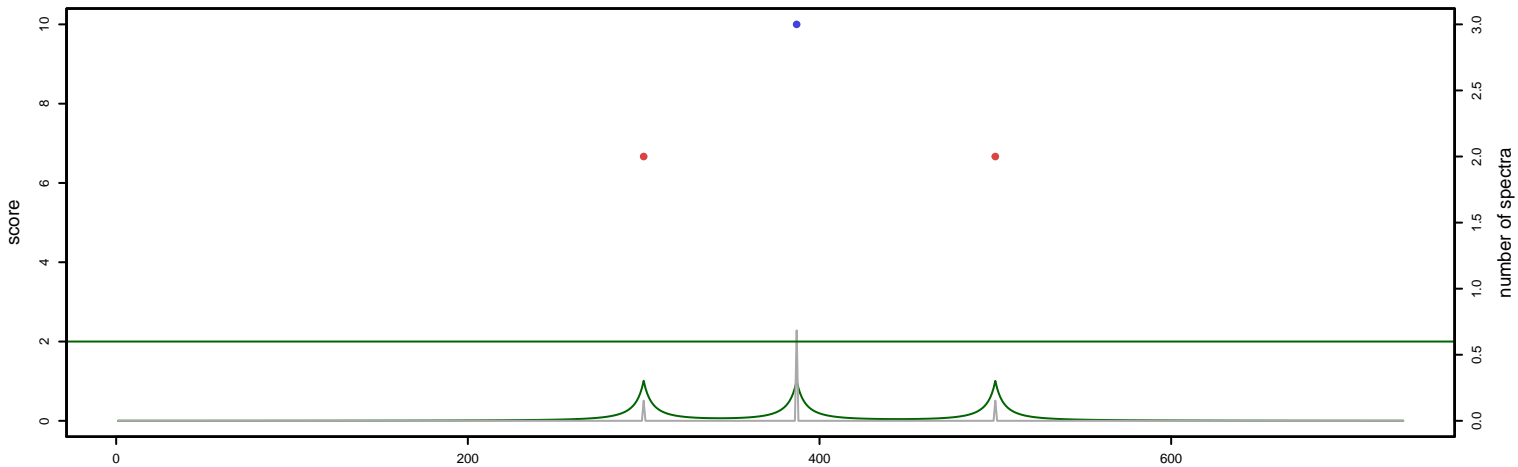

replica

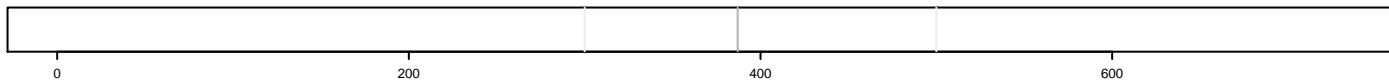

stability

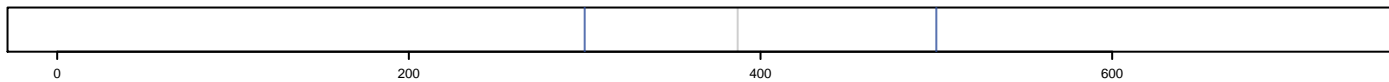

# Heat shock 70 kDa protein 1A/1B (P08107)

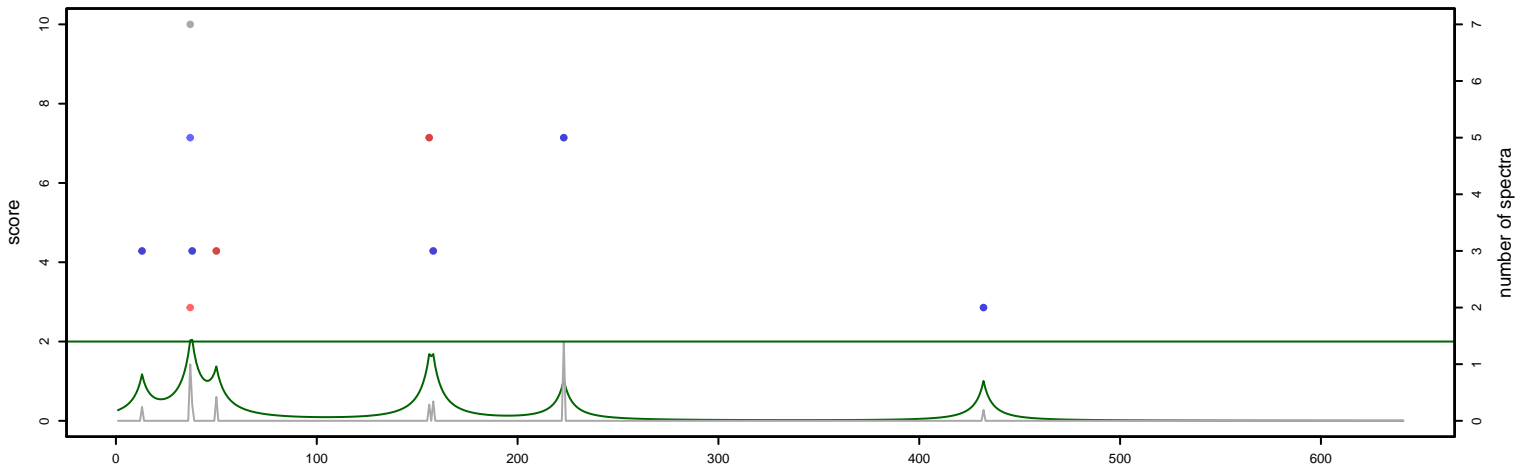

replica

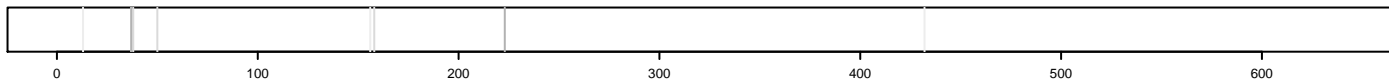

stability

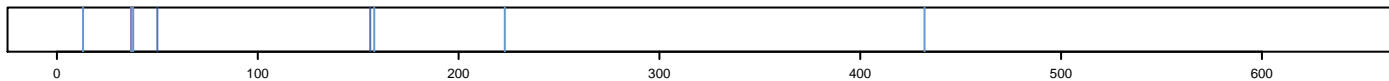



# Annexin A6 (P08133)

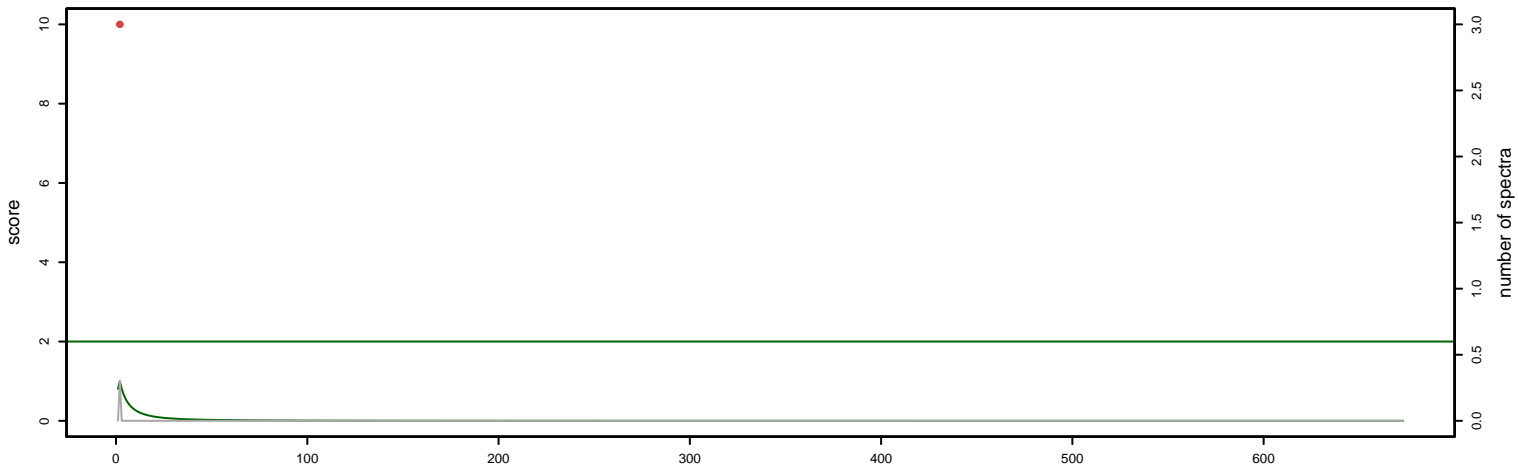

## replica

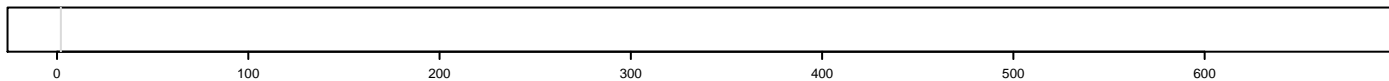

## stability

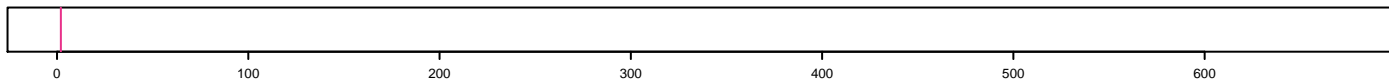

### Complement decay–accelerating factor (P08174)

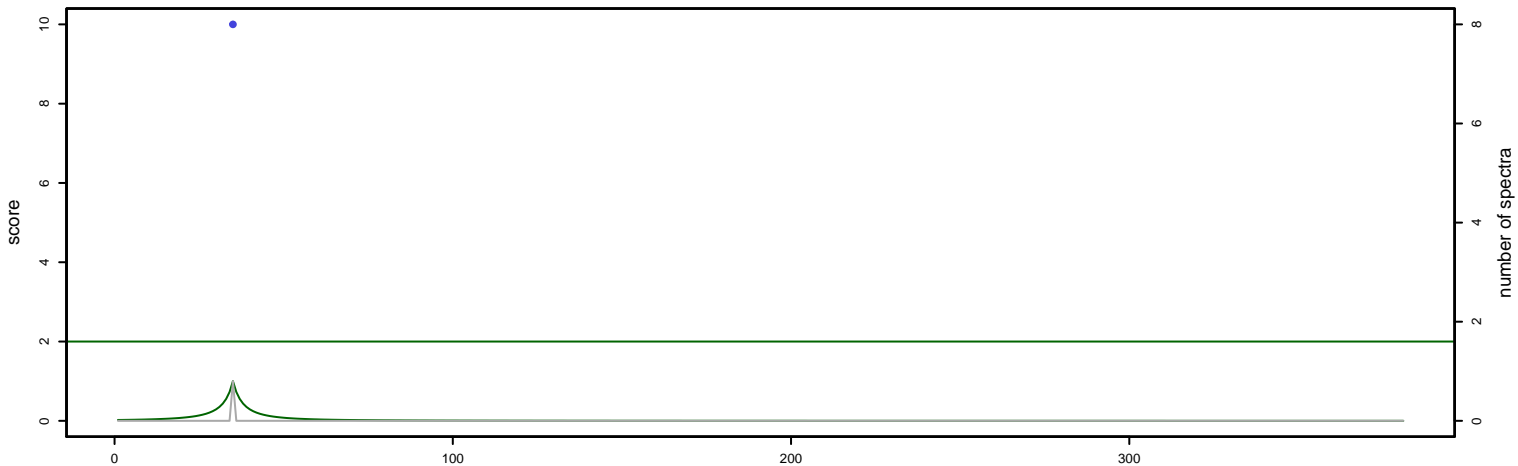

replica

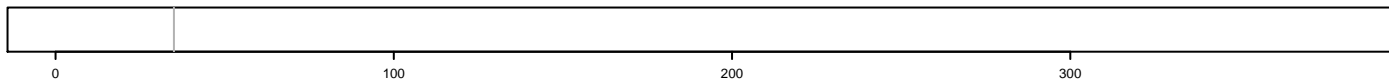

stability

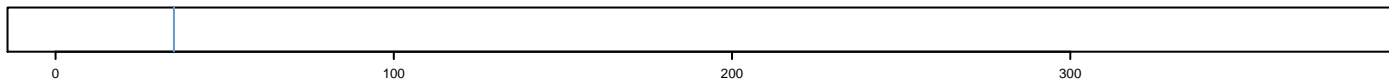

# Beta-glucuronidase (P08236)

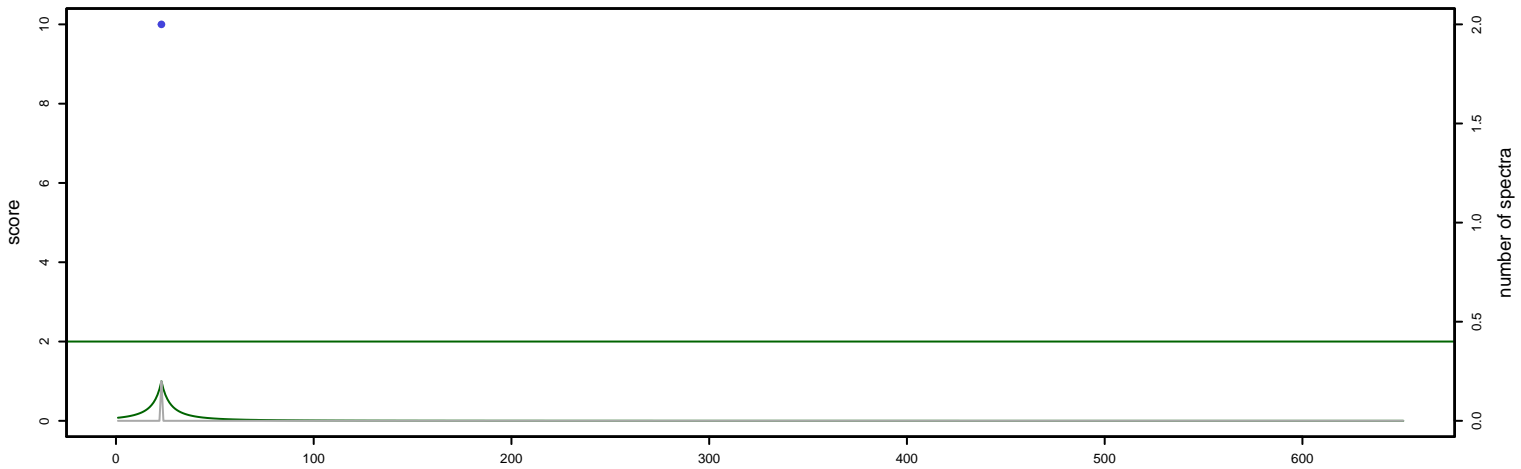

replica

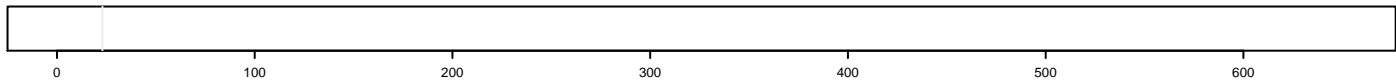

stability

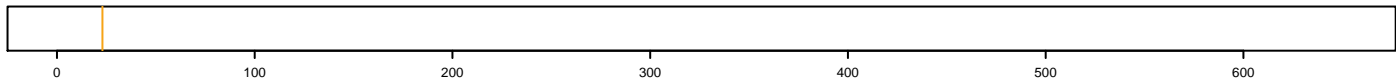

# Porphobilinogen deaminase (P08397)

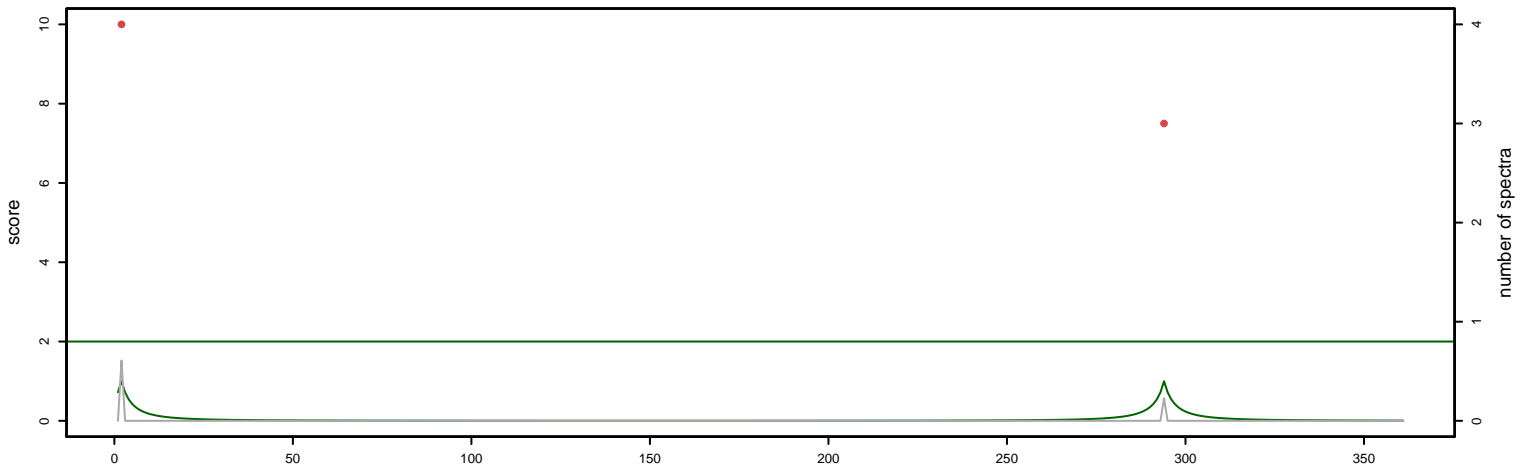

replica

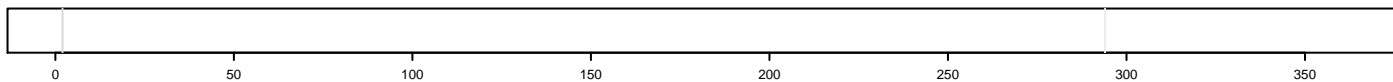

stability

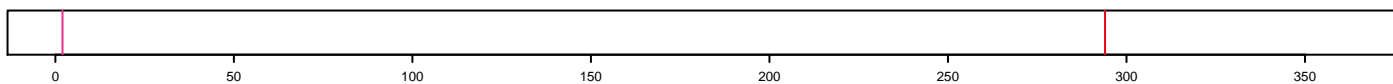

# Gamma-enolase (P09104)

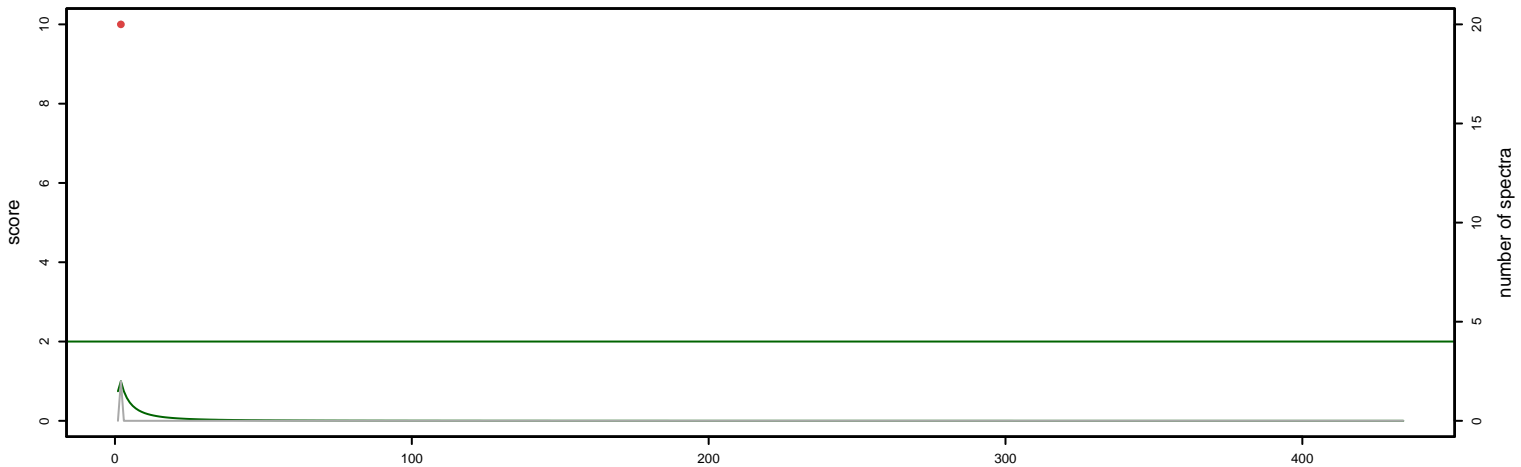

replica

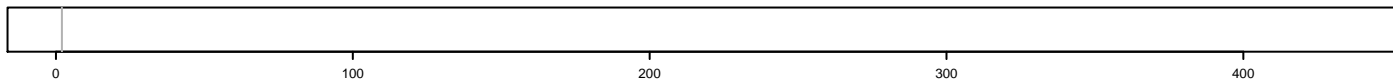

stability

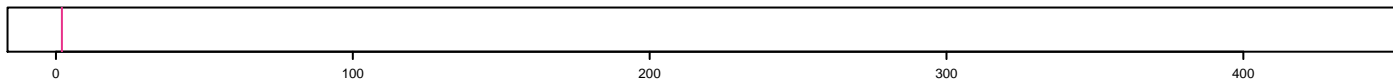

# Dihydropteridine reductase (P09417)

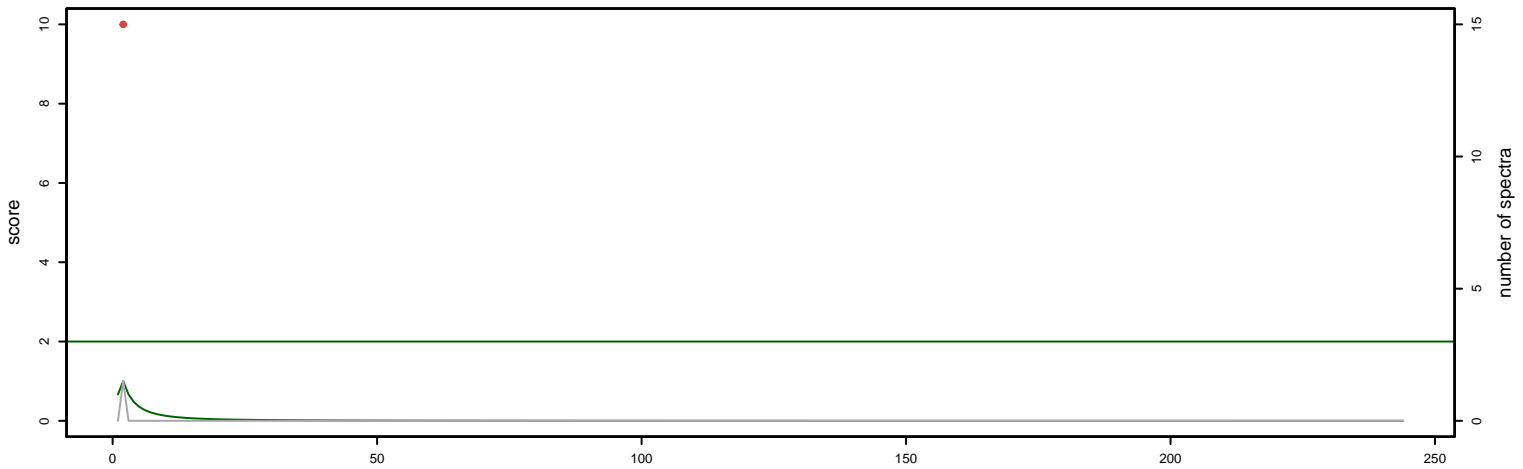

replica

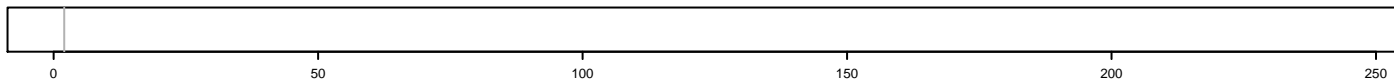

stability

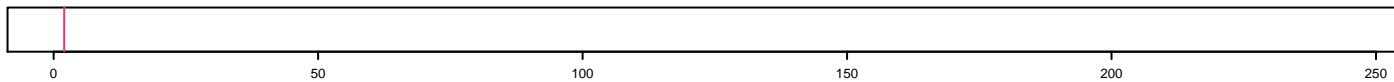

# Tropomyosin alpha-1 chain (P09493-2)

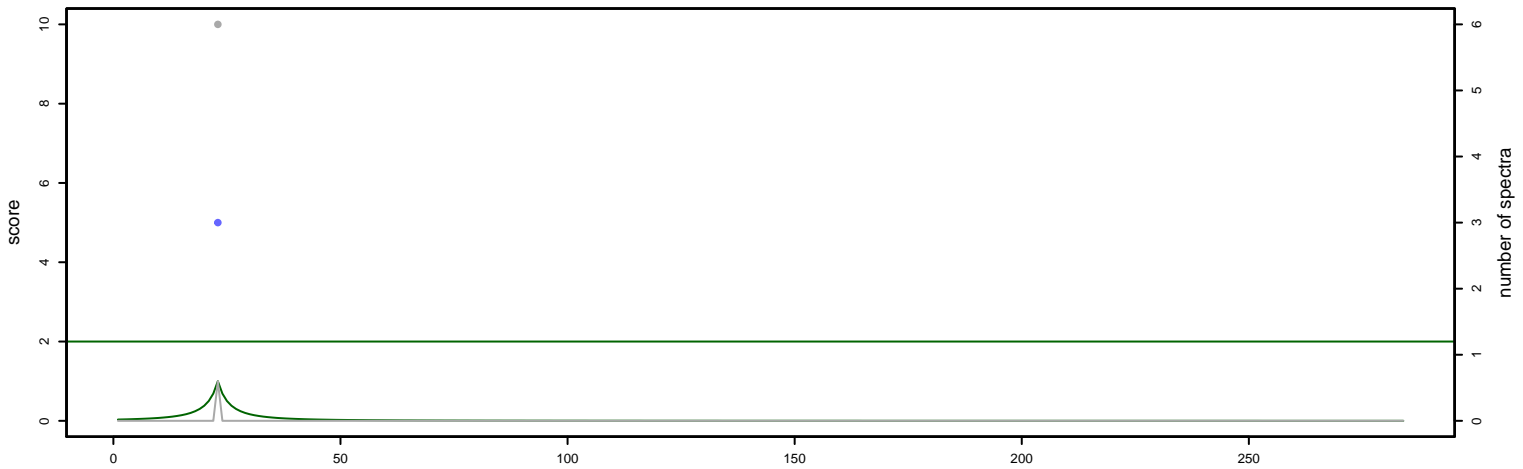

replica

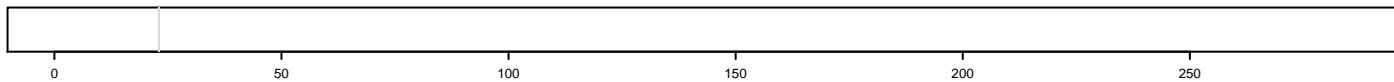

stability

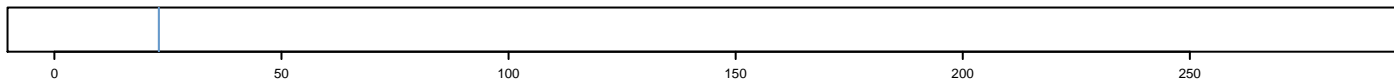

# Tropomyosin alpha-1 chain (P09493-5)

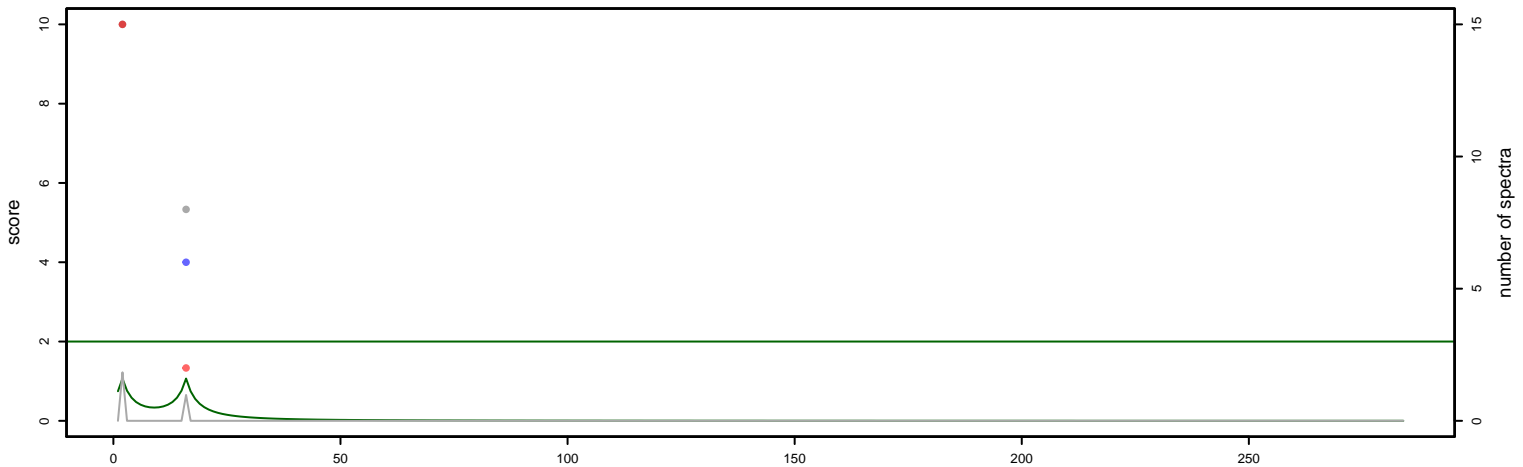

replica

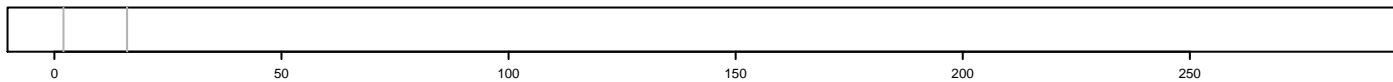

stability

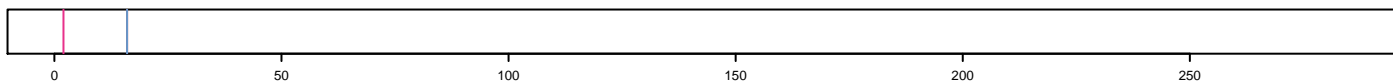



# Heterogeneous nuclear ribonucleoprotein A1 (P09651)

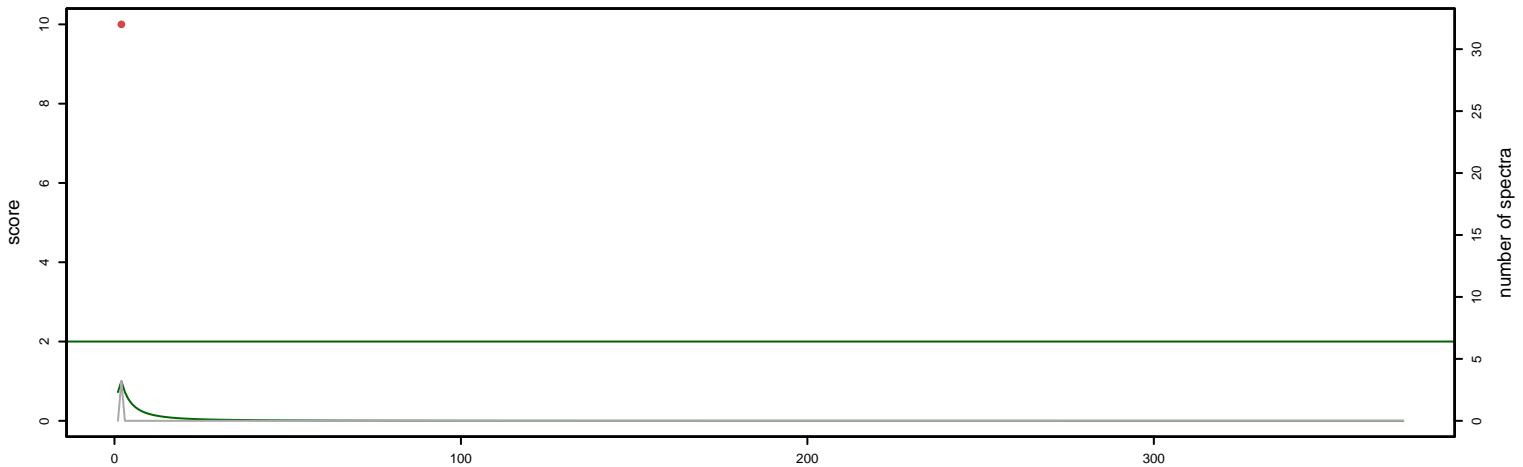

replica

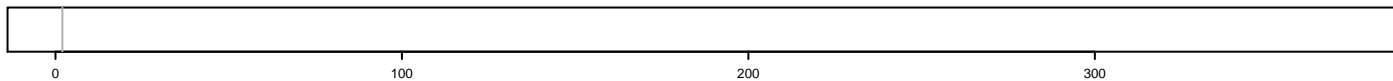

stability

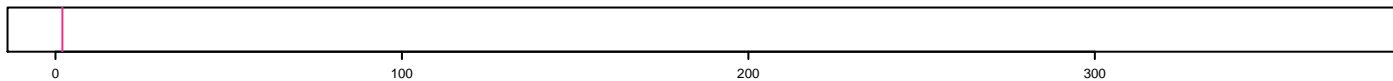

# Leukotriene A-4 hydrolase (P09960)

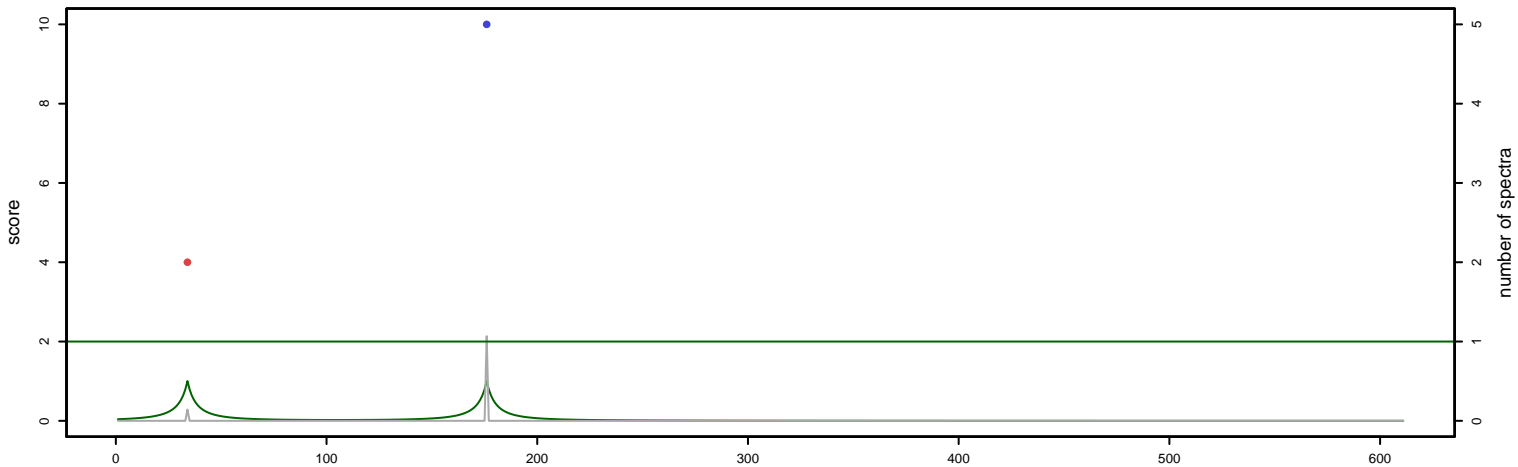

replica

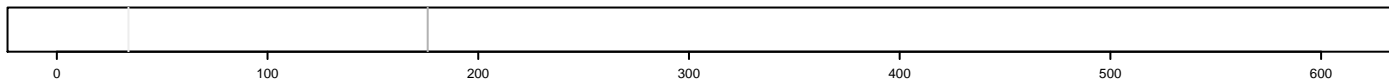

stability

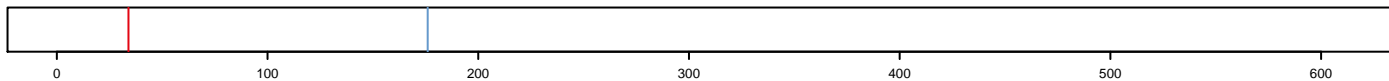

# Polyubiquitin-B (P0CG47)

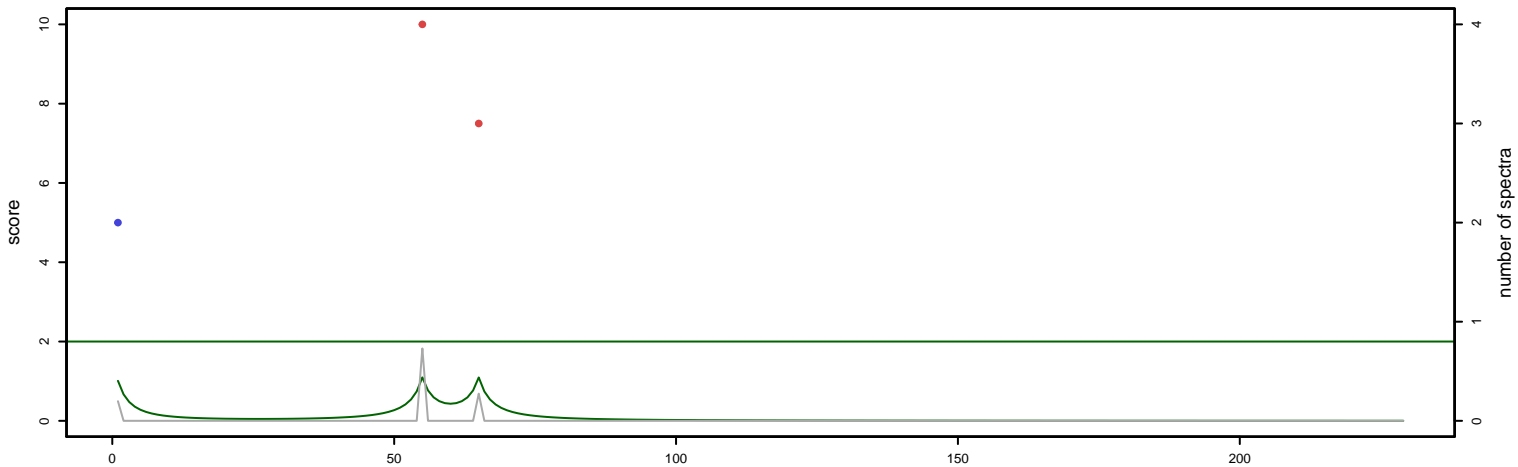

replica

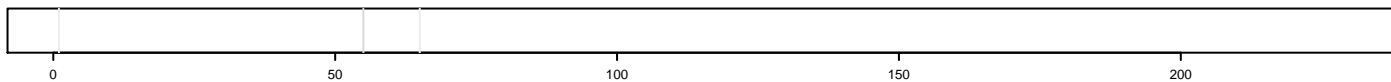

stability

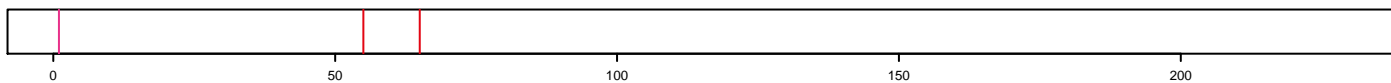

# cAMP-dependent protein kinase type I-alpha regulatory subunit (P10644)

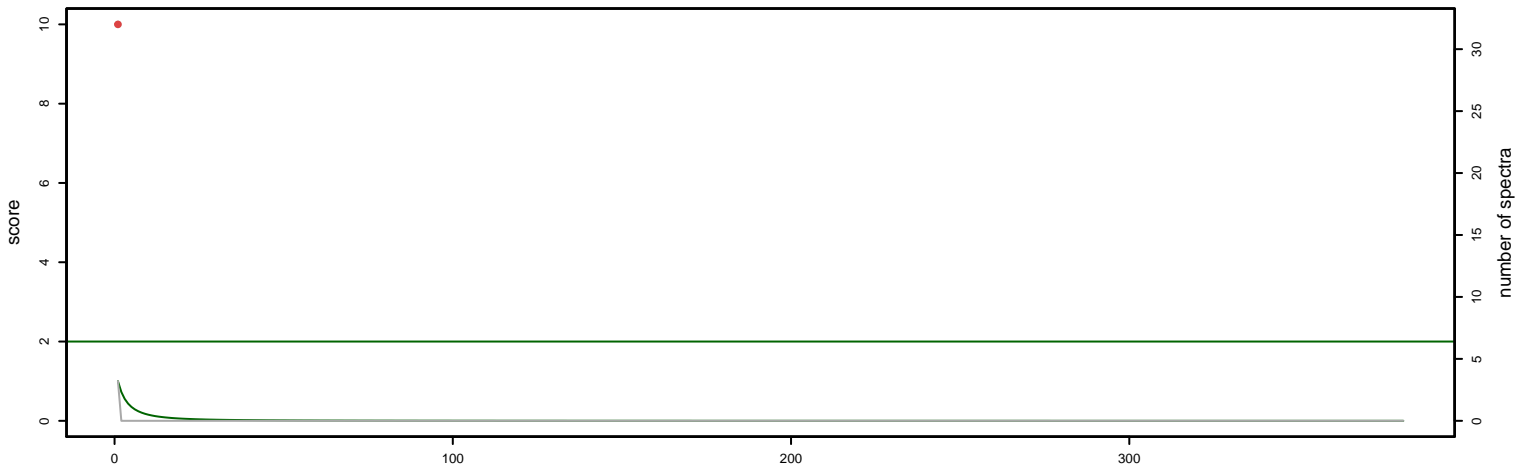

replica

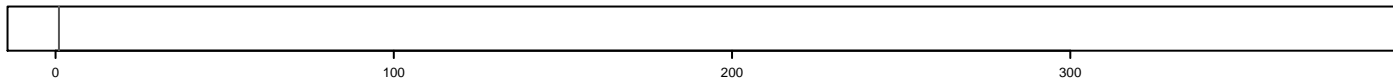

stability

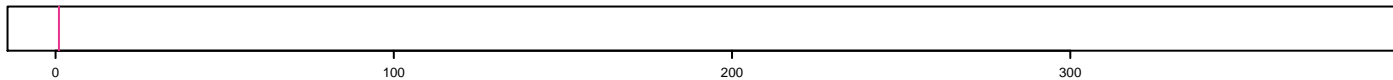

### S-formylglutathione hydrolase (P10768)

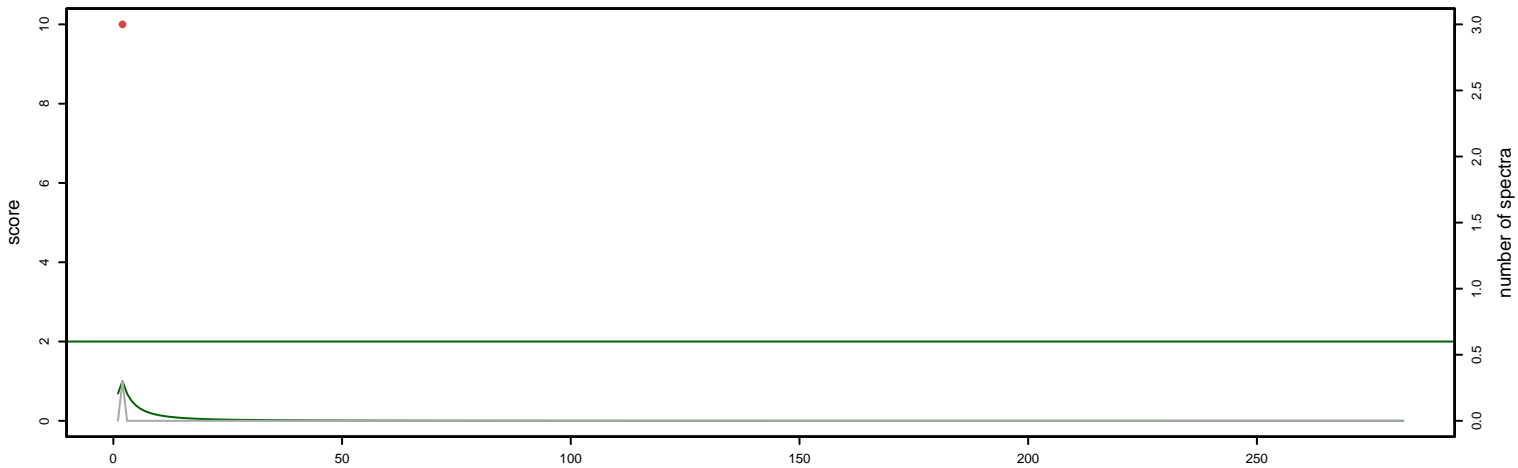

replica

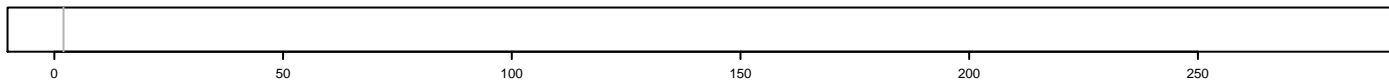

stability

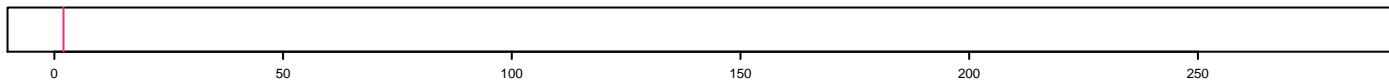

# Heat shock cognate 71 kDa protein (P11142)

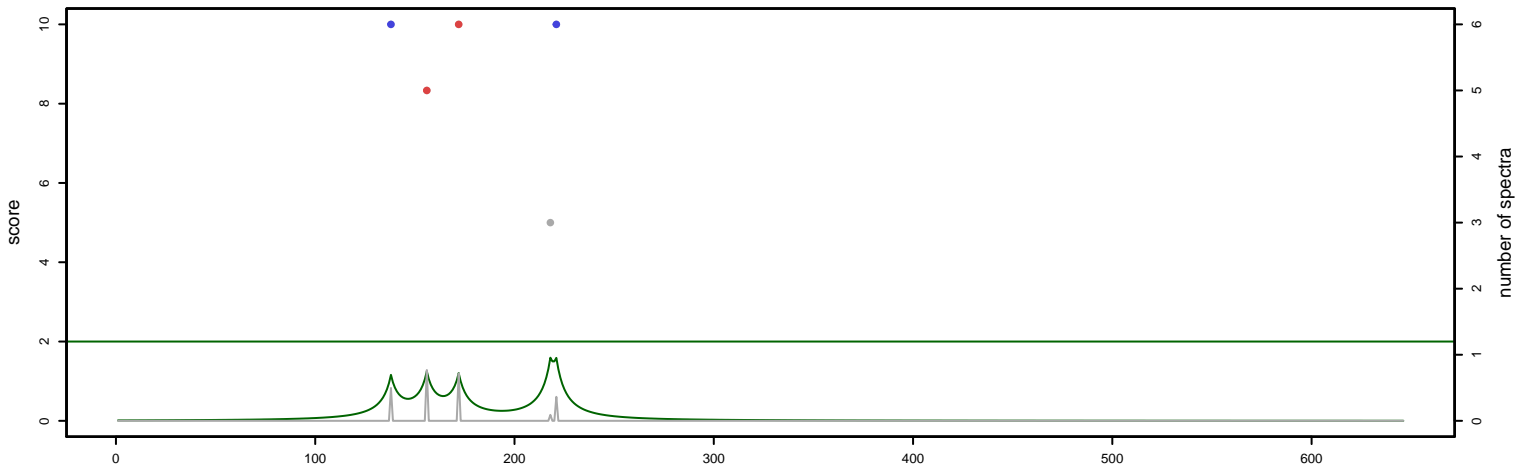

replica

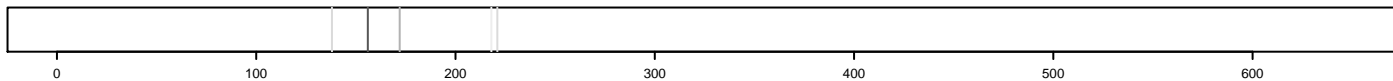

stability

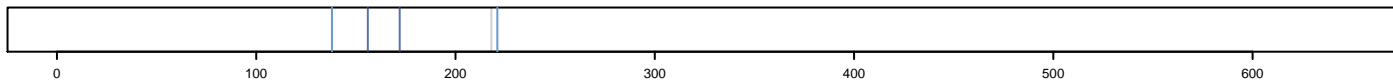

### Solute carrier family 2, facilitated glucose transporter member 1 (P11166)

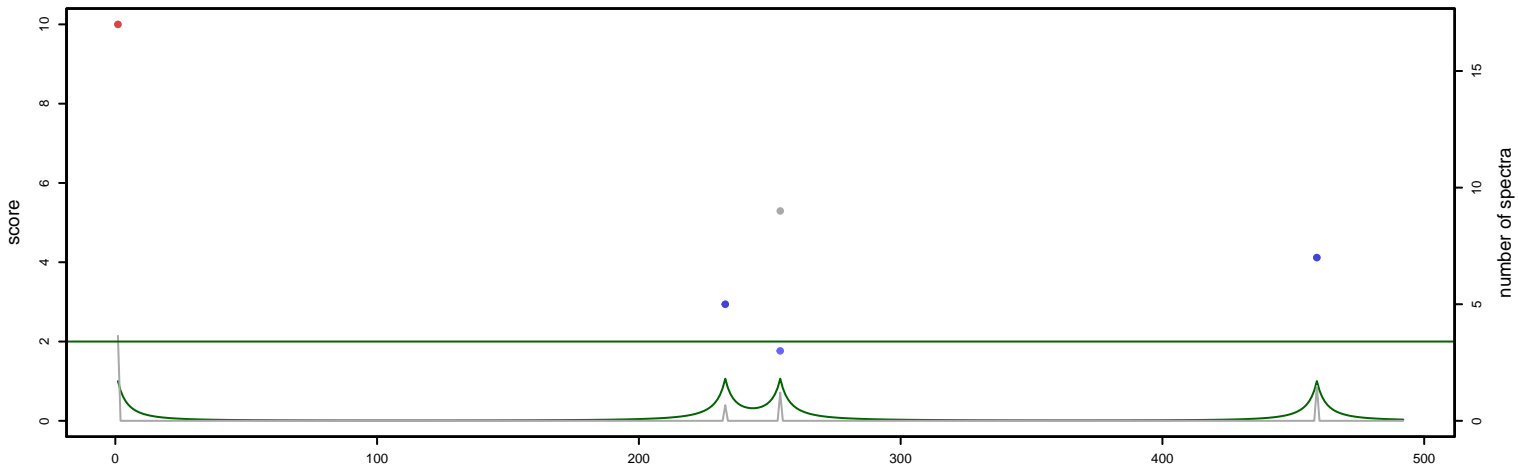

replica

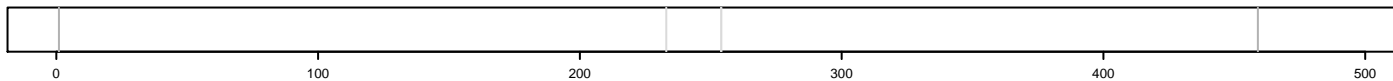

stability

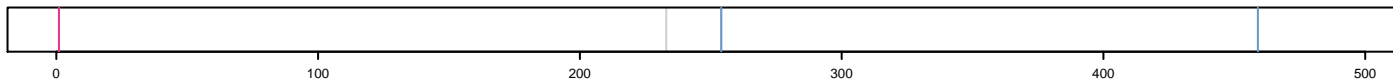

# Protein 4.1 (P11171)

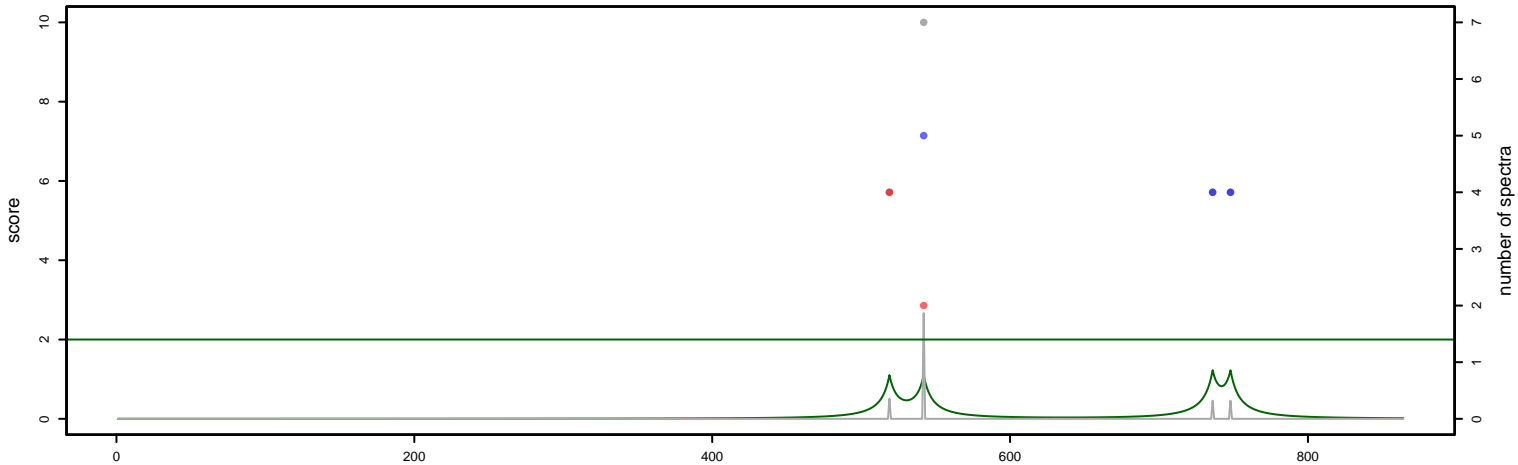

## replica

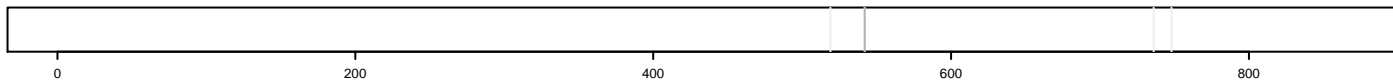

## stability

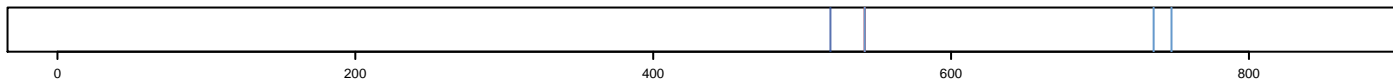



### Protein 4.1 (P11171-3)

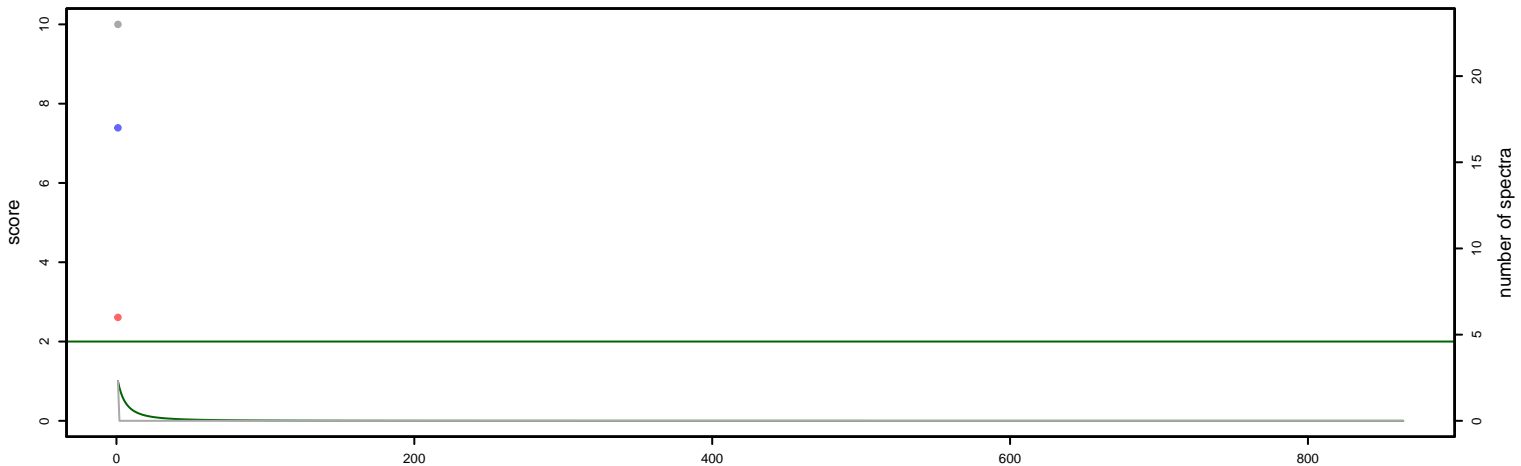

replica

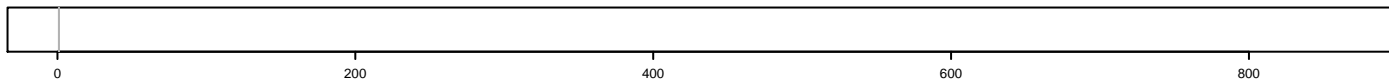

stability

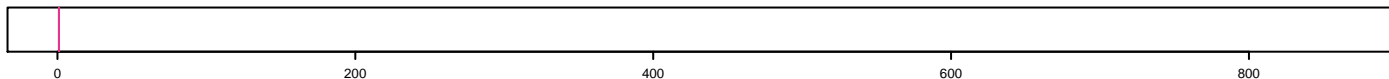

# Spectrin beta chain, erythrocytic (P11277)

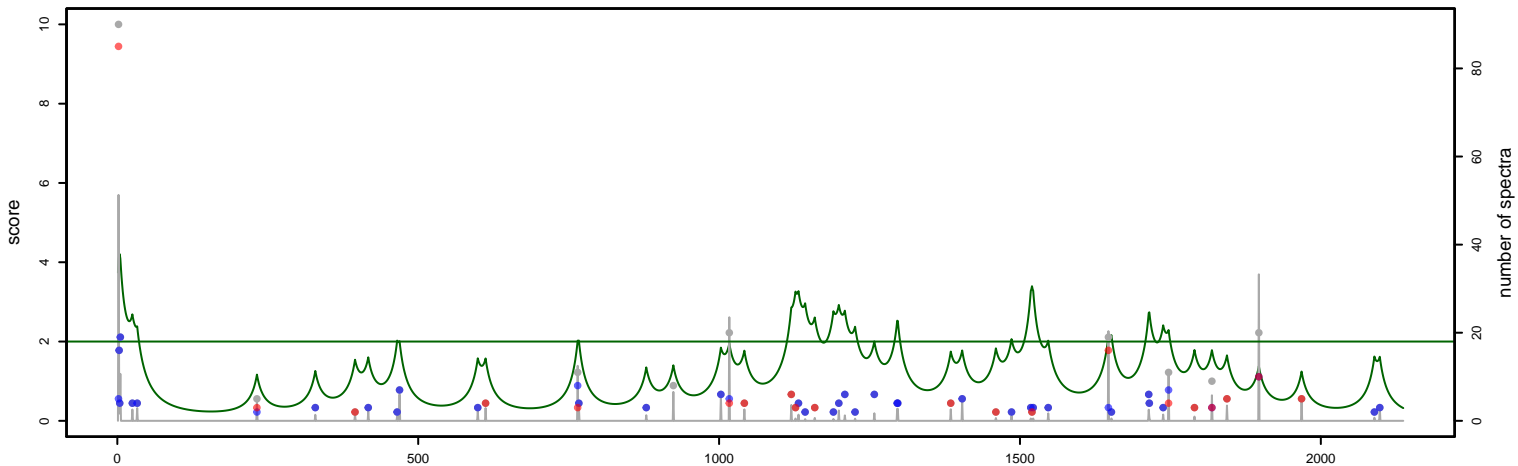

## replica

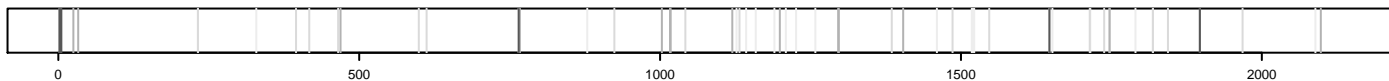

## stability

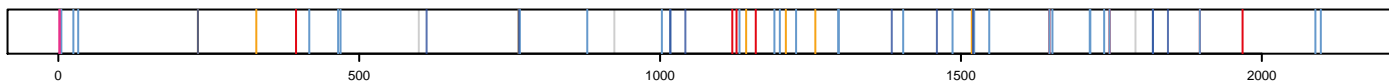

# Glucose-6-phosphate 1-dehydrogenase (P11413)

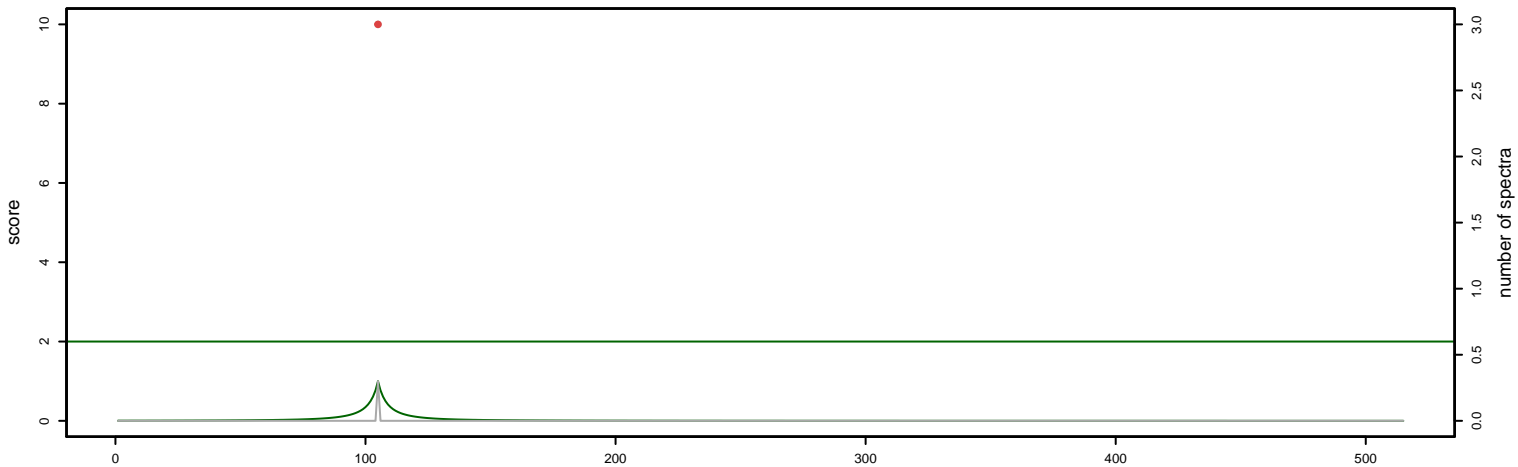

replica

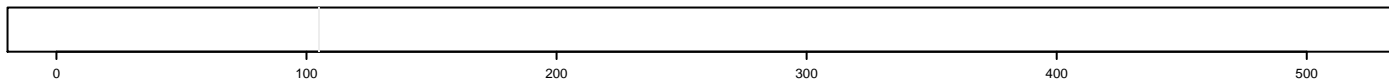

stability

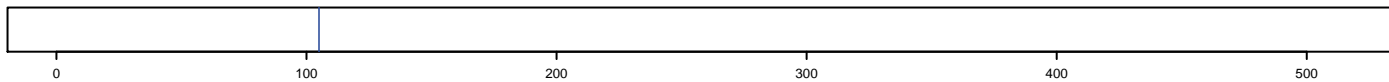

### C-1-tetrahydrofolate synthase, cytoplasmic (P11586)

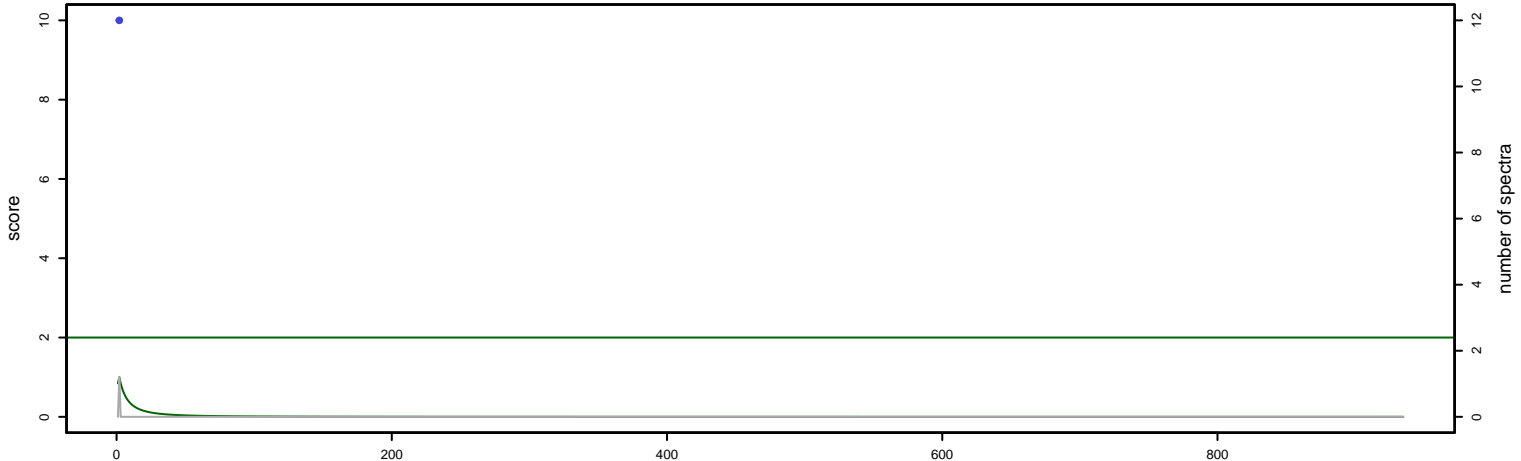

replica

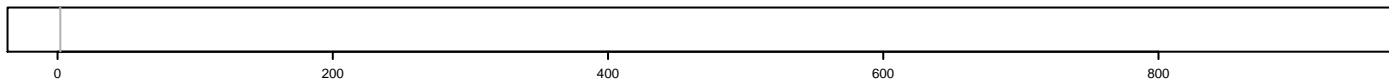

stability

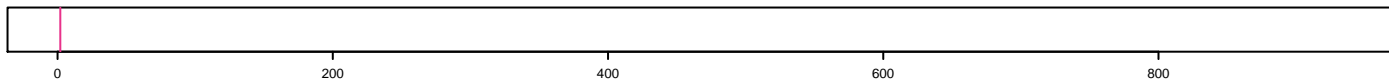

# Ribonuclease inhibitor (P13489)

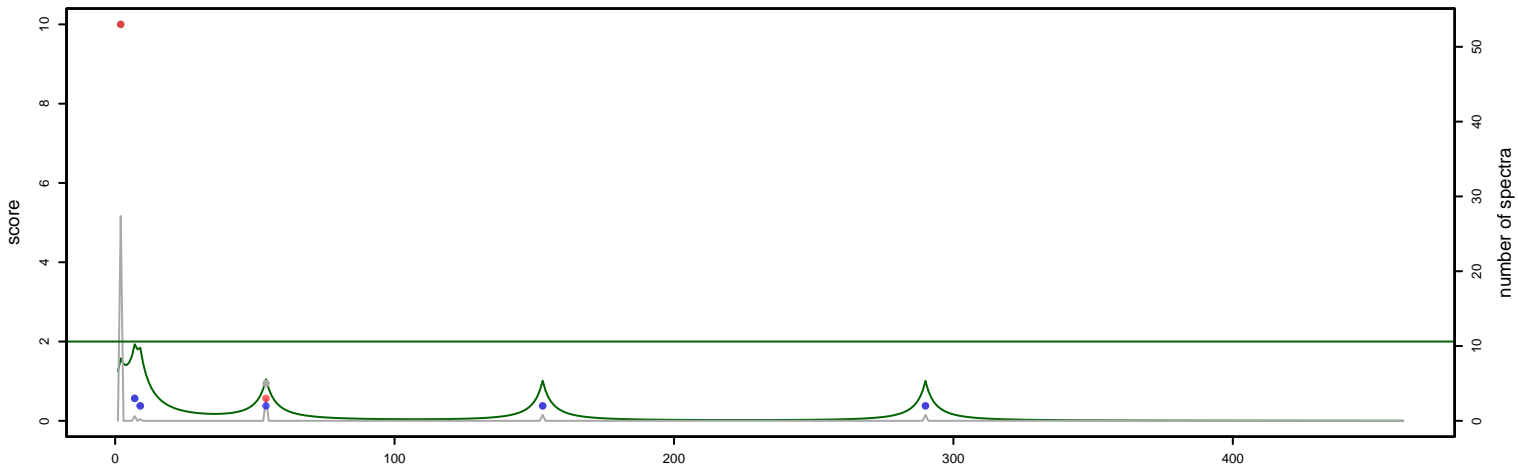

replica

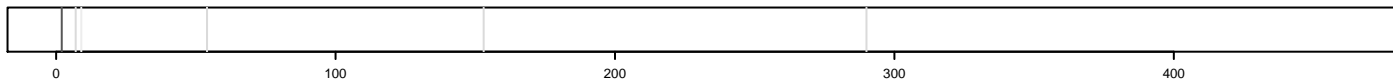

stability

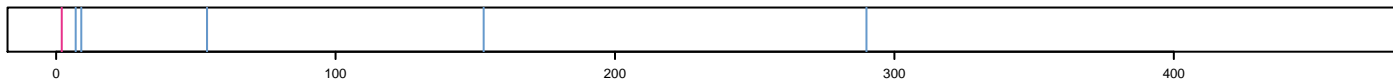

# Elongation factor 2 (P13639)

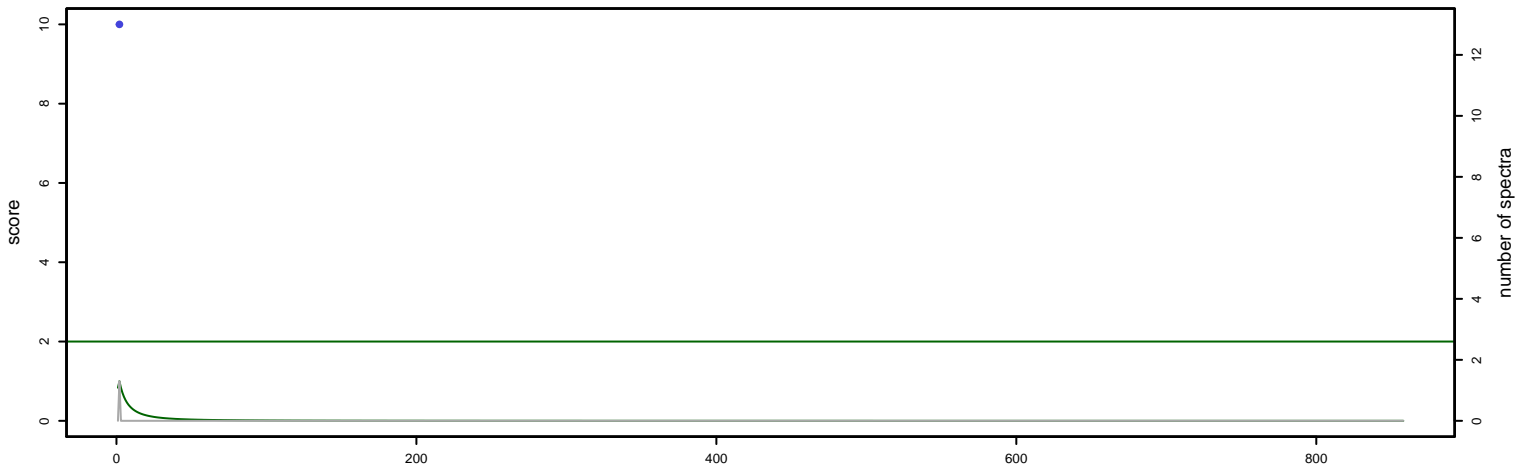

replica

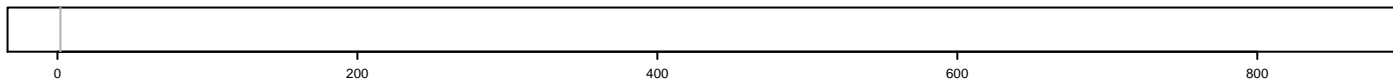

stability

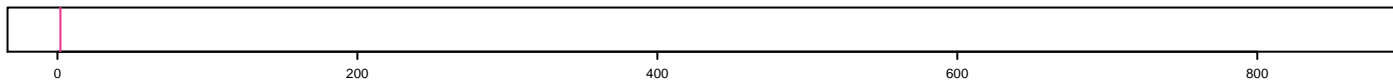

### Delta-aminolevulinic acid dehydratase (P13716)

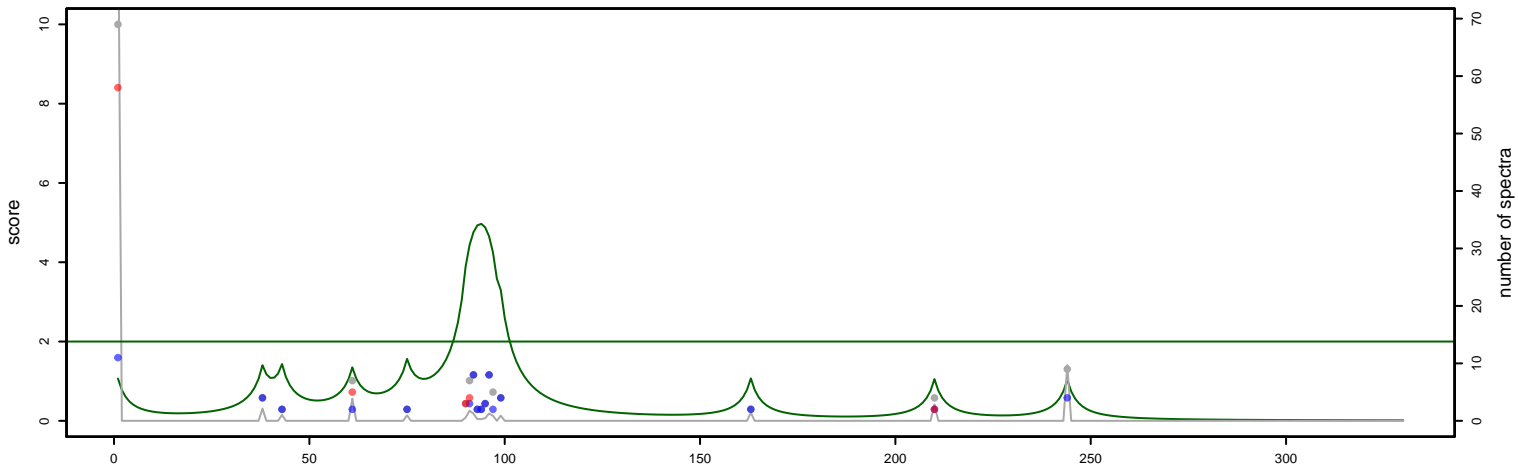

replica

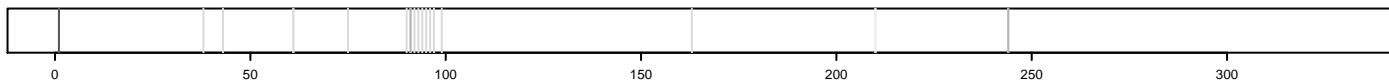

stability

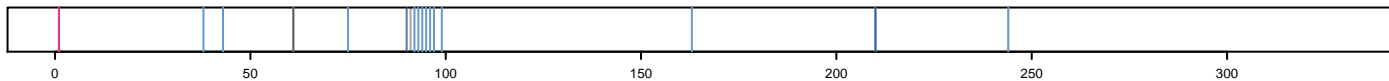

# Plastin-2 (P13796)

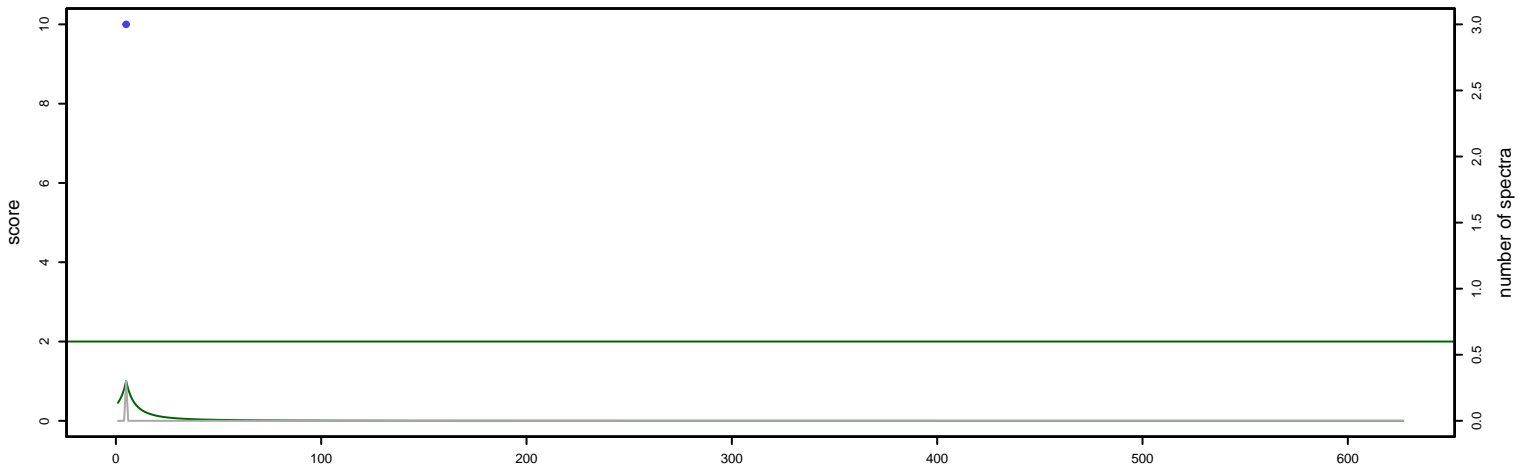

## replica

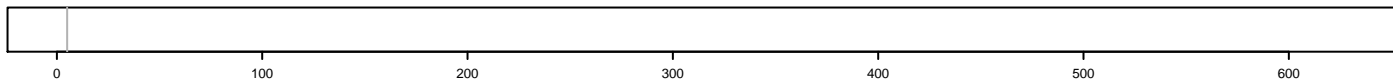

## stability

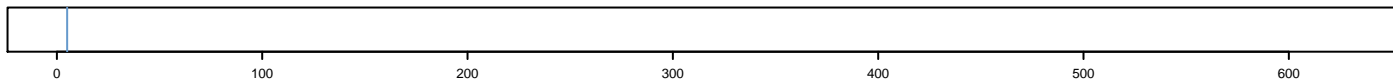



# Acylamino-acid-releasing enzyme (P13798)

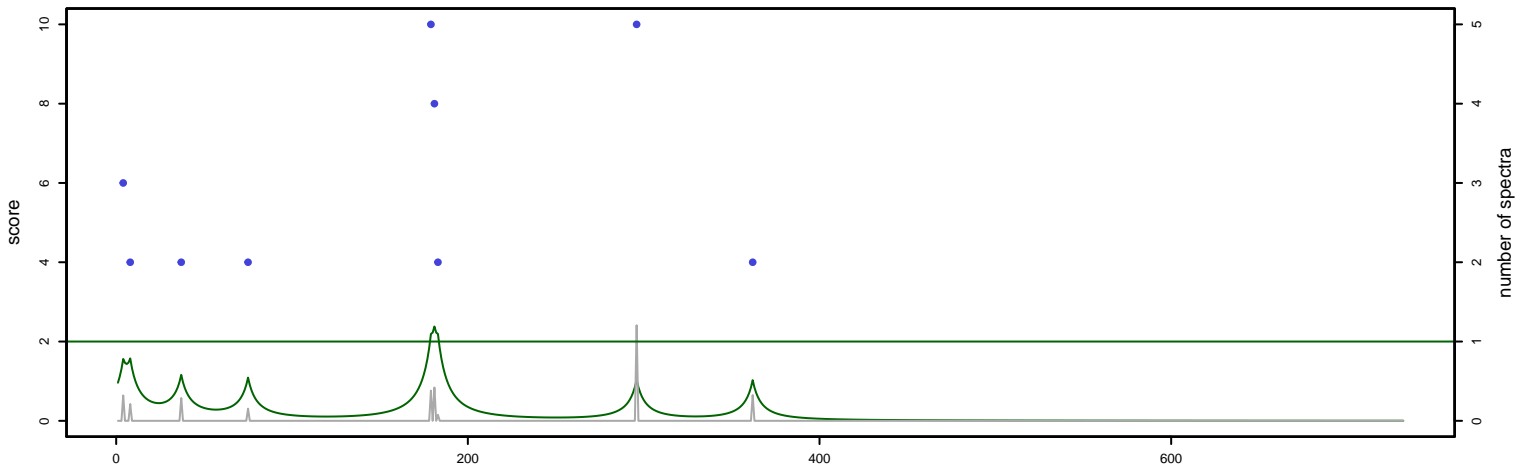

replica

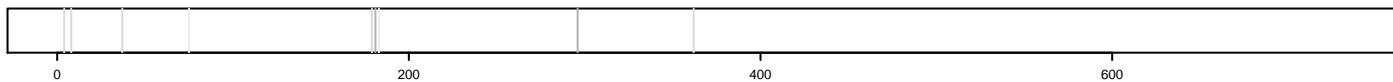

stability

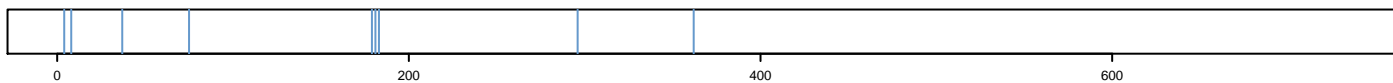

### Macrophage migration inhibitory factor (P14174)

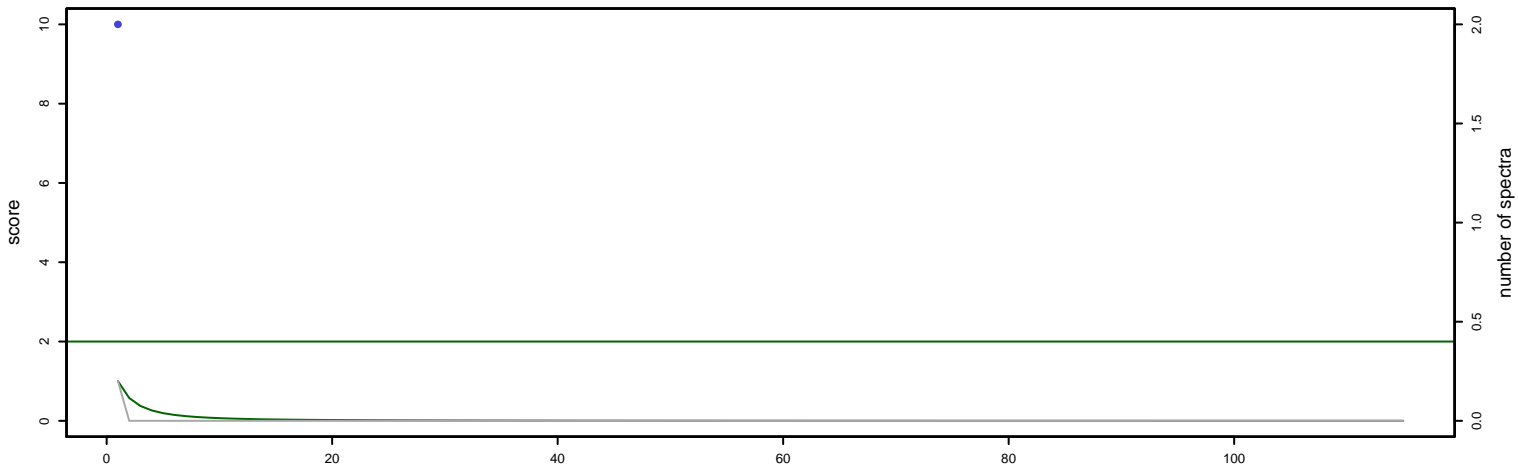

replica

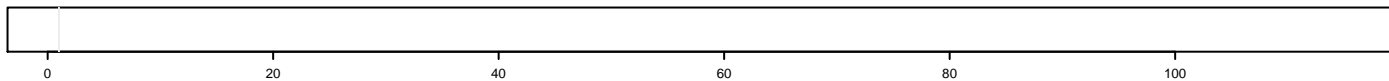

stability

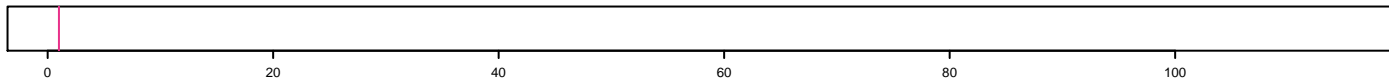

# Farnesyl pyrophosphate synthase (P14324)

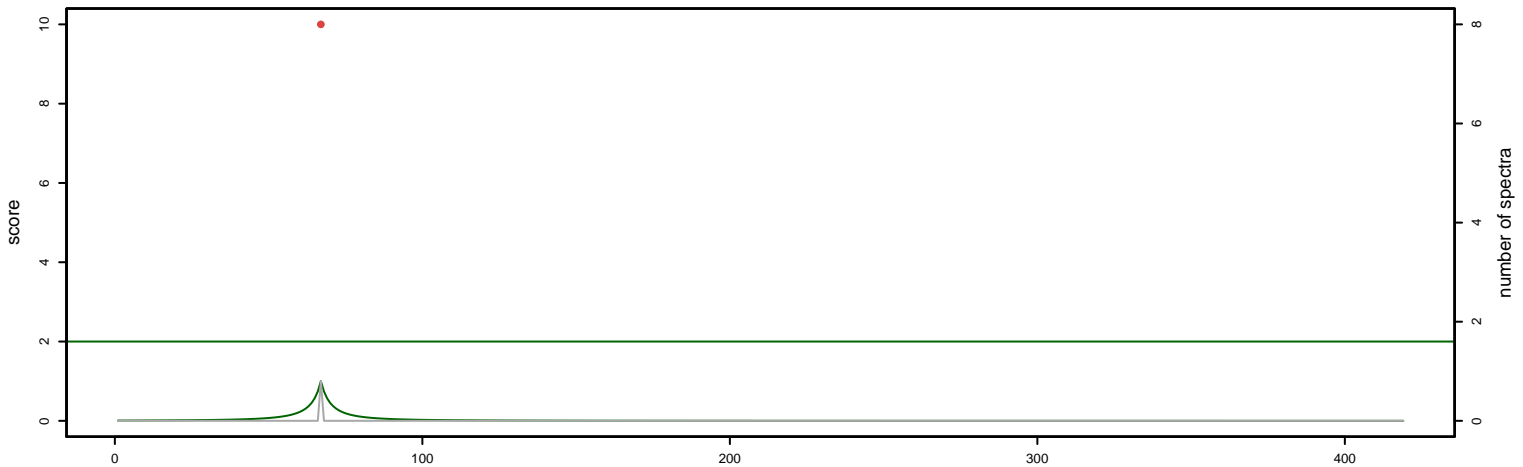

replica

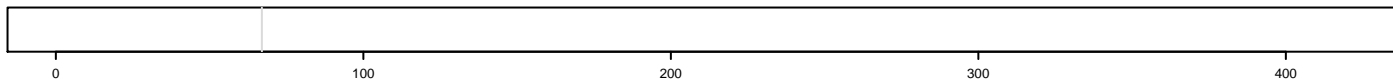

stability

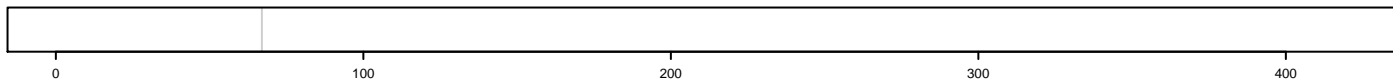

# Endoplasmin (P14625)

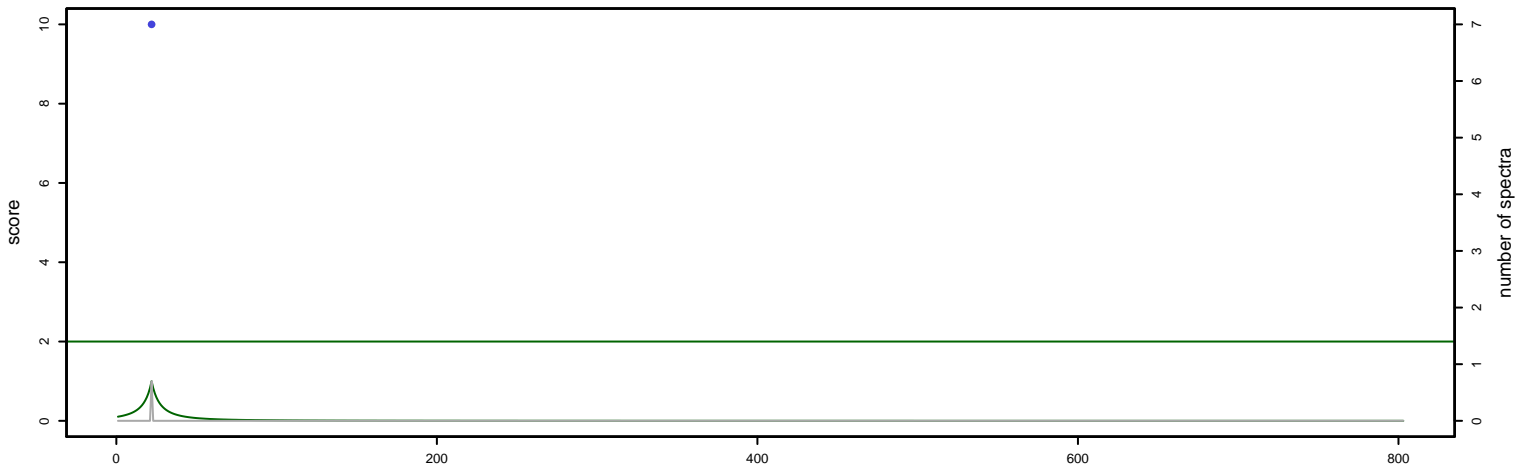

## replica

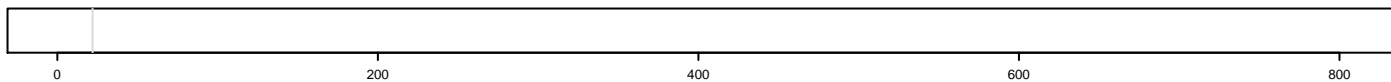

## stability

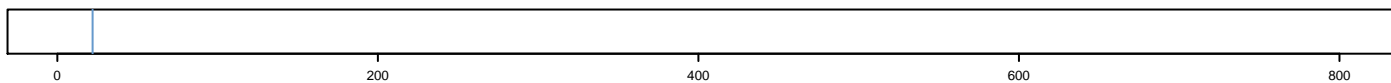

# Aspartate--tRNA ligase, cytoplasmic (P14868)

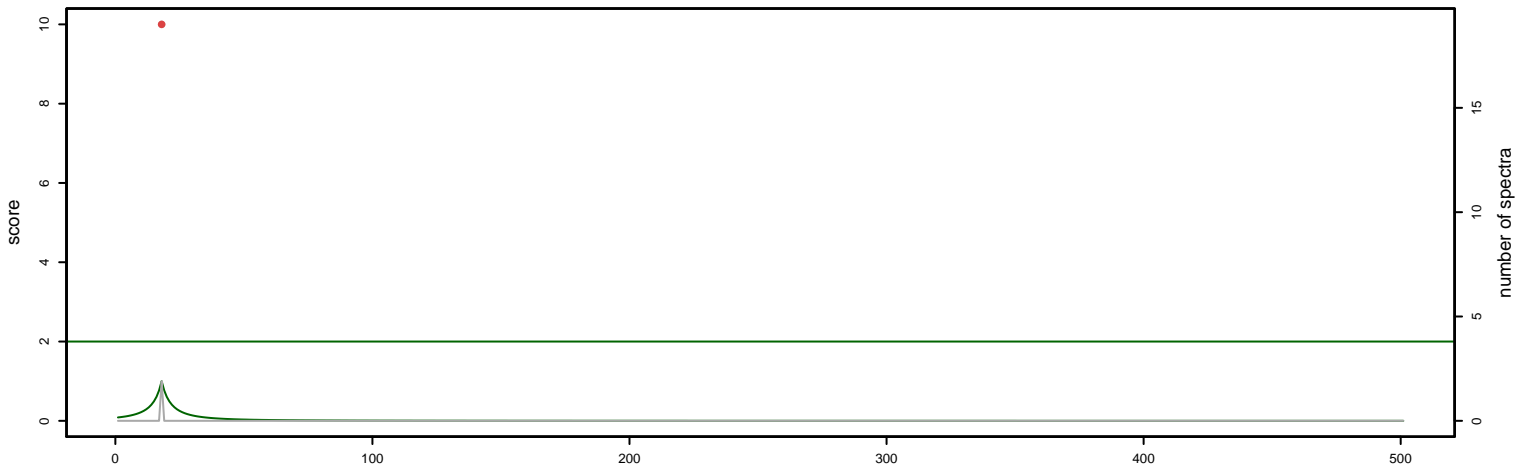

replica

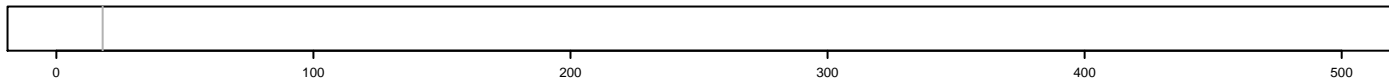

stability

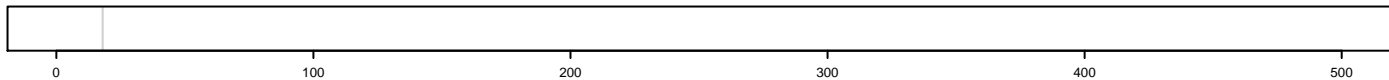

# Phosphoglycerate mutase 2 (P15259)

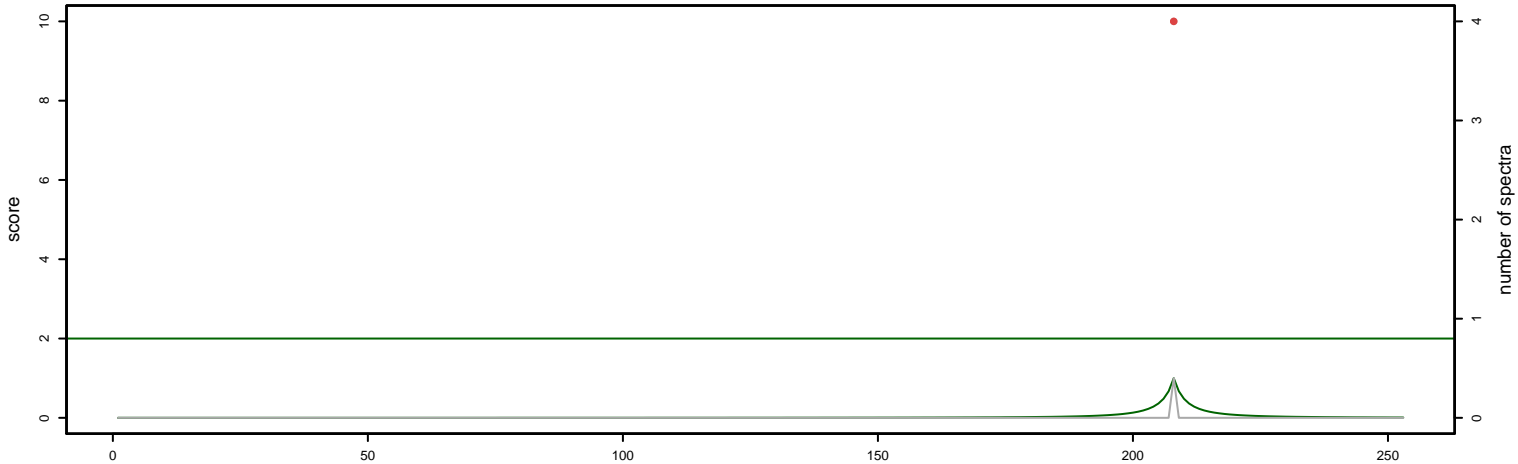

replica

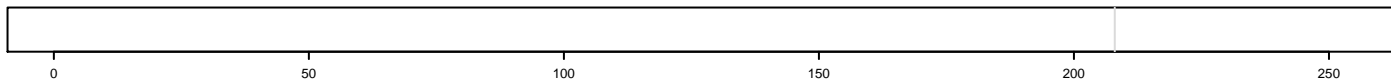

stability

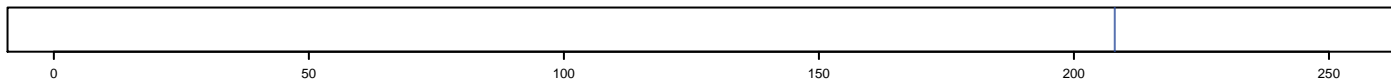

# Nucleoside diphosphate kinase A (P15531)

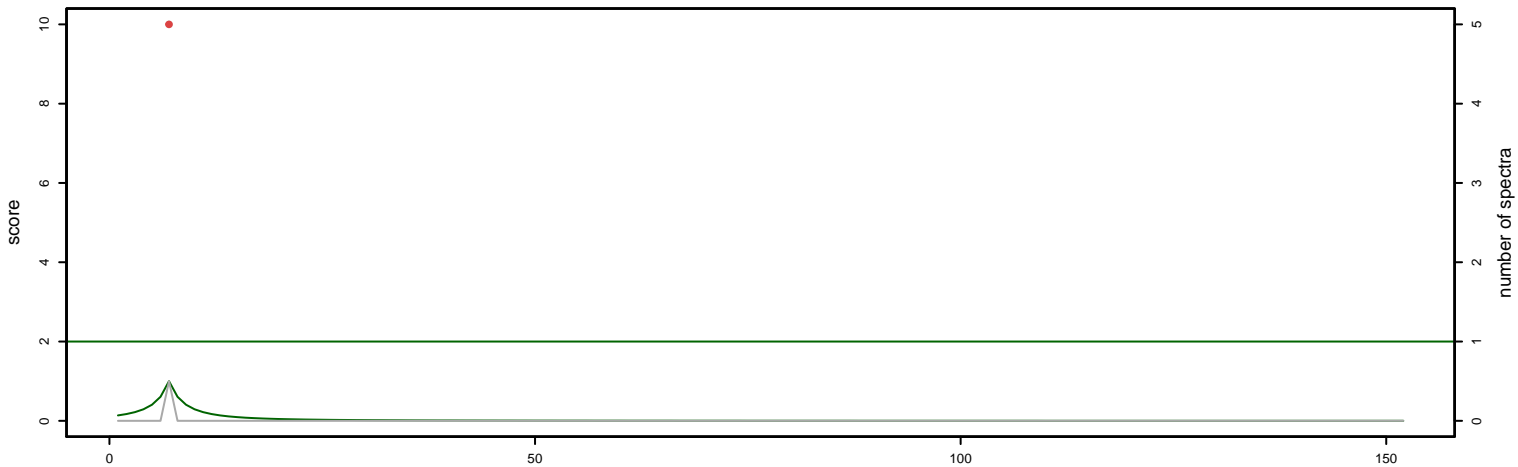

replica

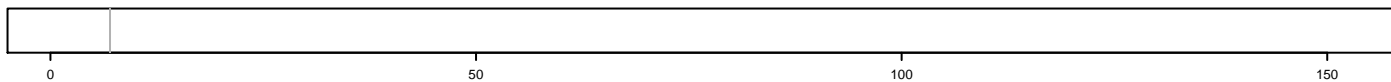

stability

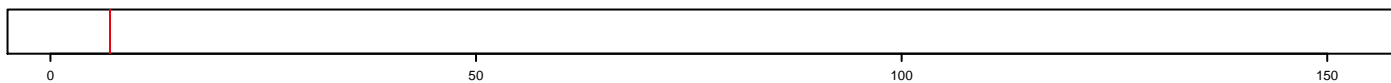

# Ribosylidihyronicotinamide dehydrogenase [quinone] (P16083)

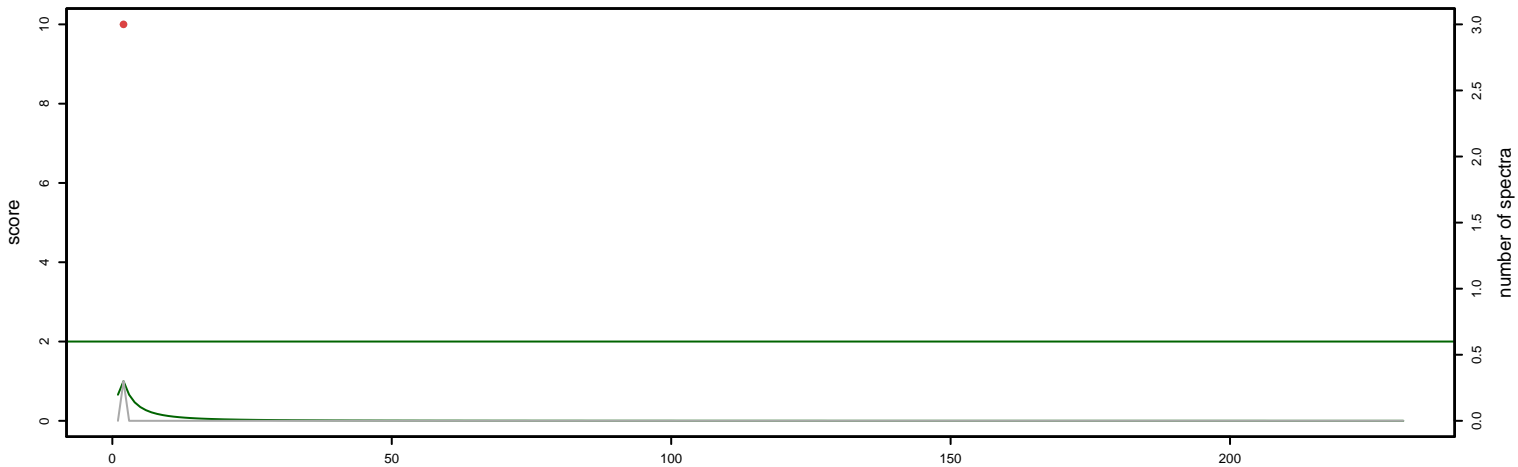

replica

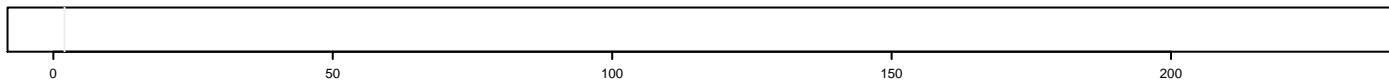

stability

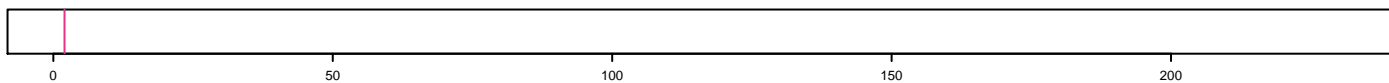



# Ankyrin-1 (P16157)

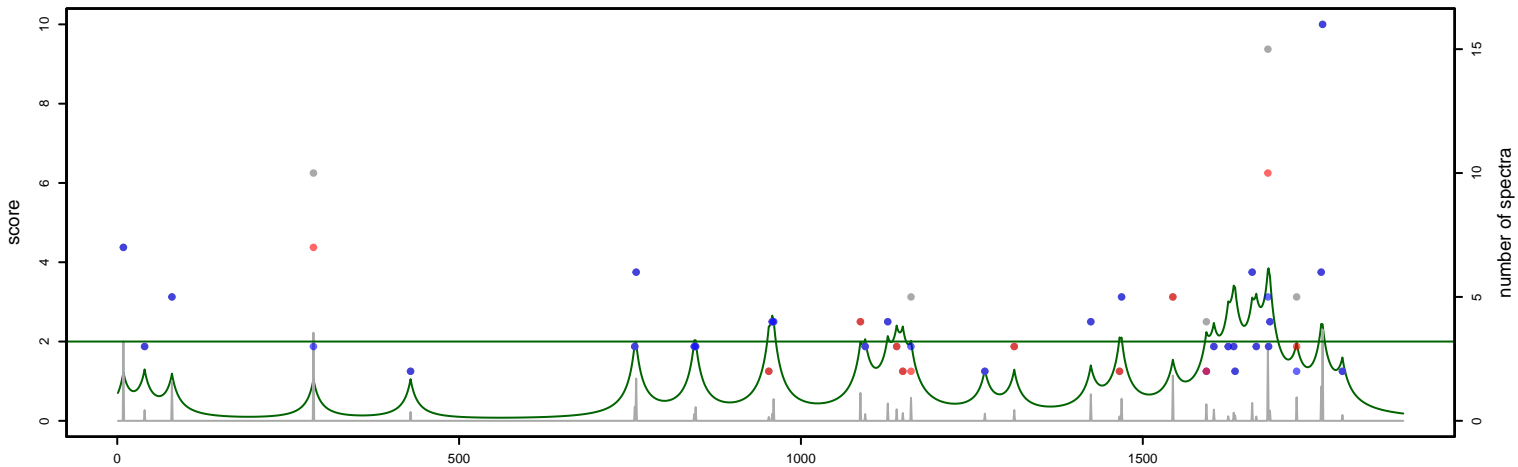

## replica

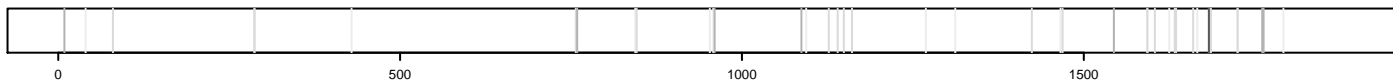

## stability

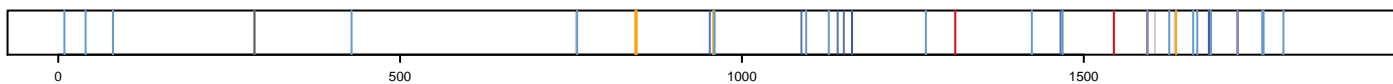

### Erythrocyte membrane protein band 4.2 (P16452)

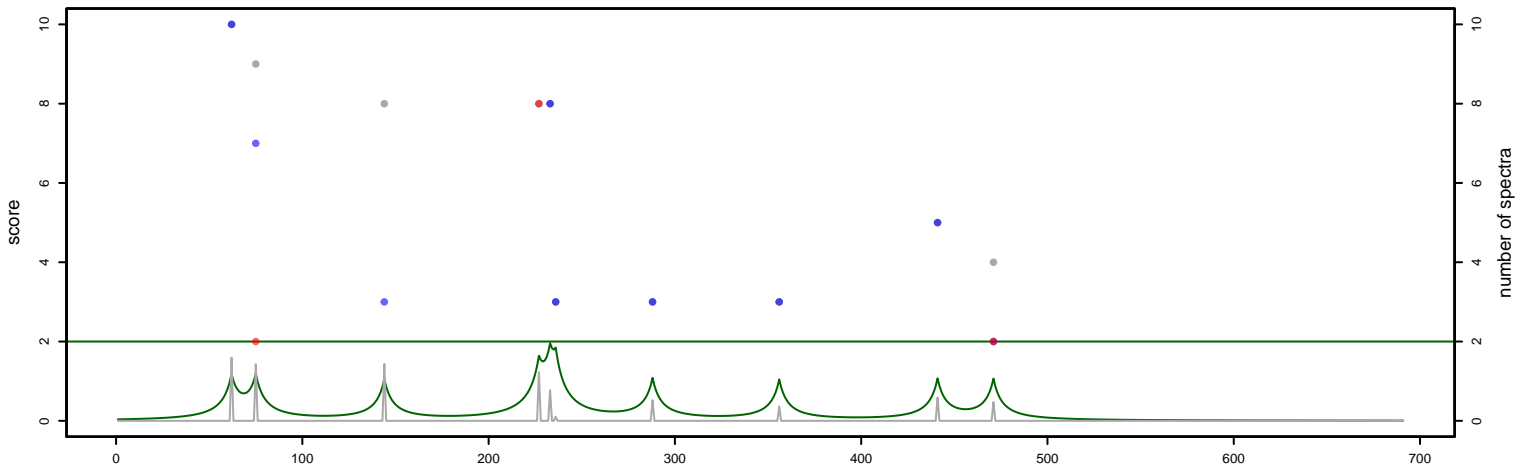

replica

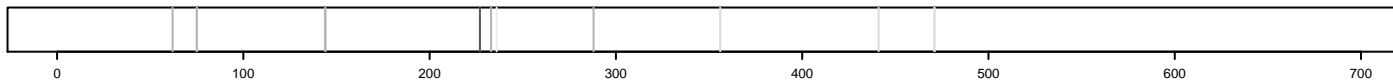

stability

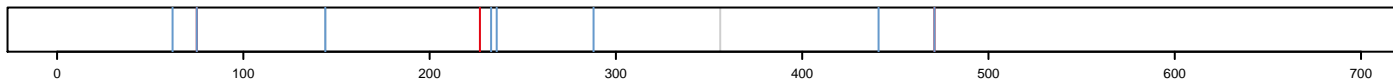

# cAMP-dependent protein kinase catalytic subunit alpha (P17612)

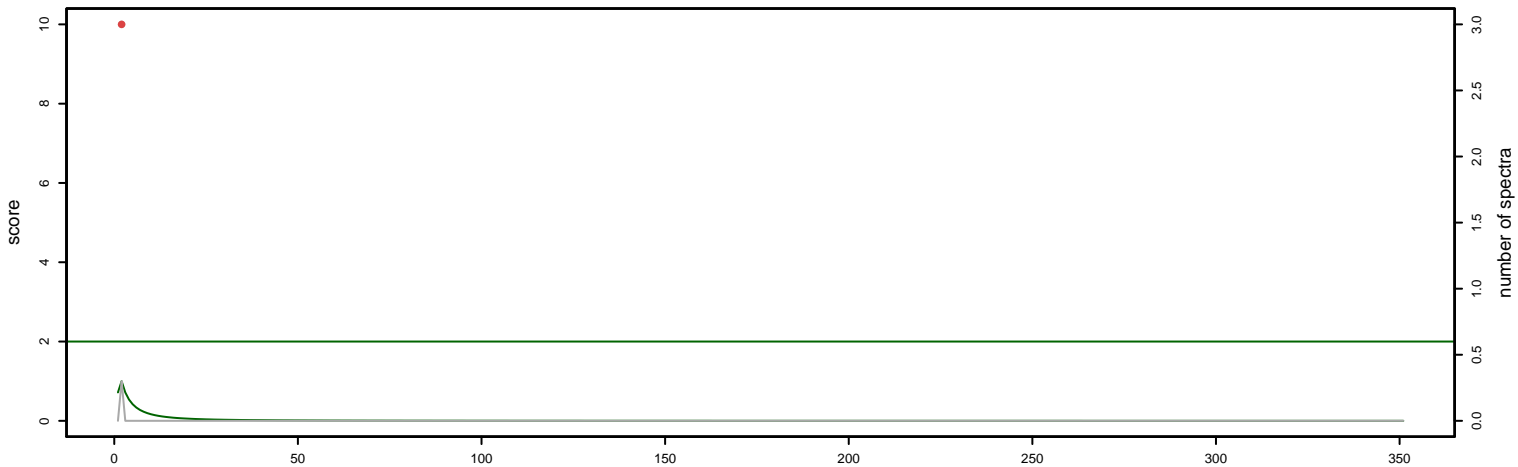

replica

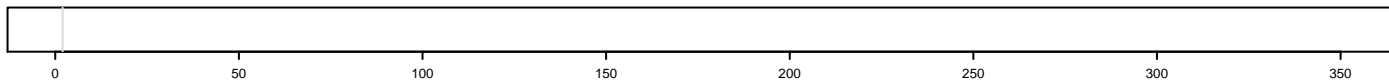

stability

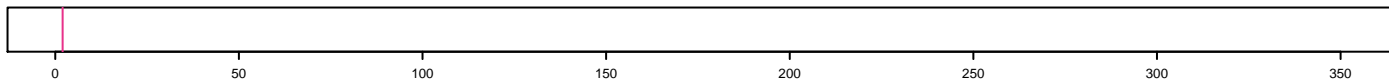

### 6-phosphofructokinase, liver type (P17858)

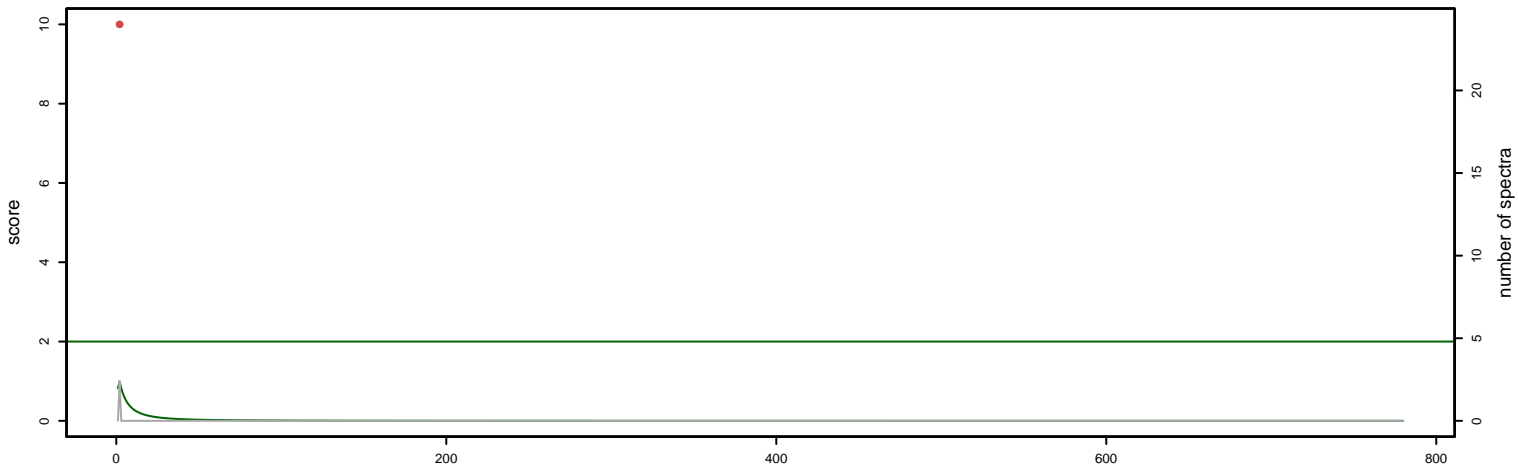

replica

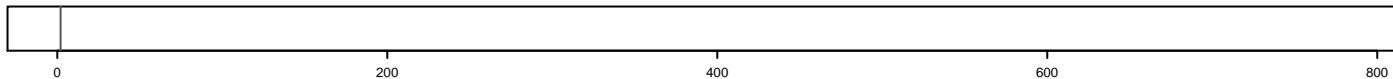

stability

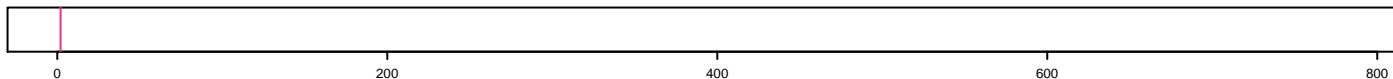

# T-complex protein 1 subunit alpha (P17987)

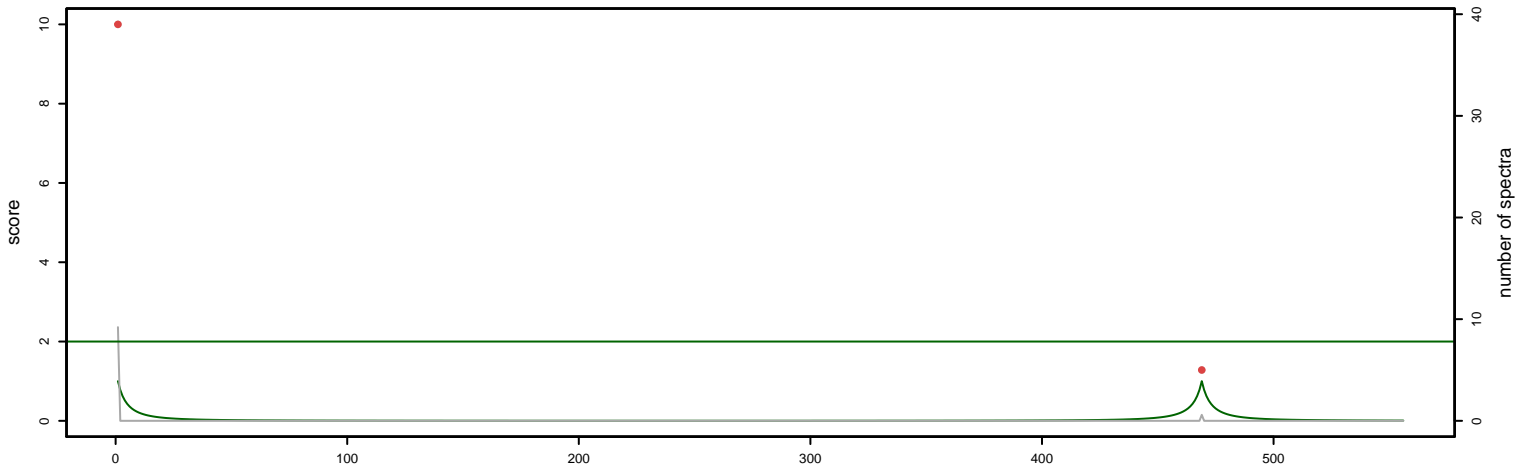

replica

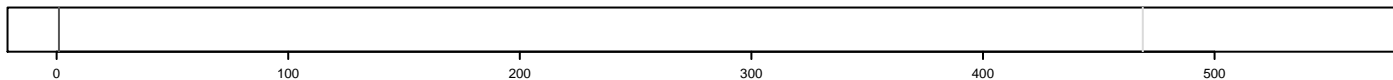

stability

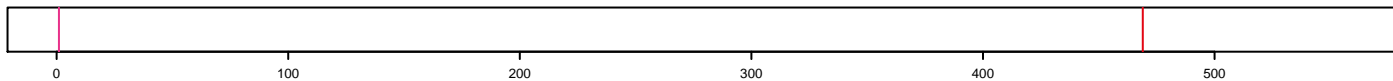

# Phosphoglycerate mutase 1 (P18669)

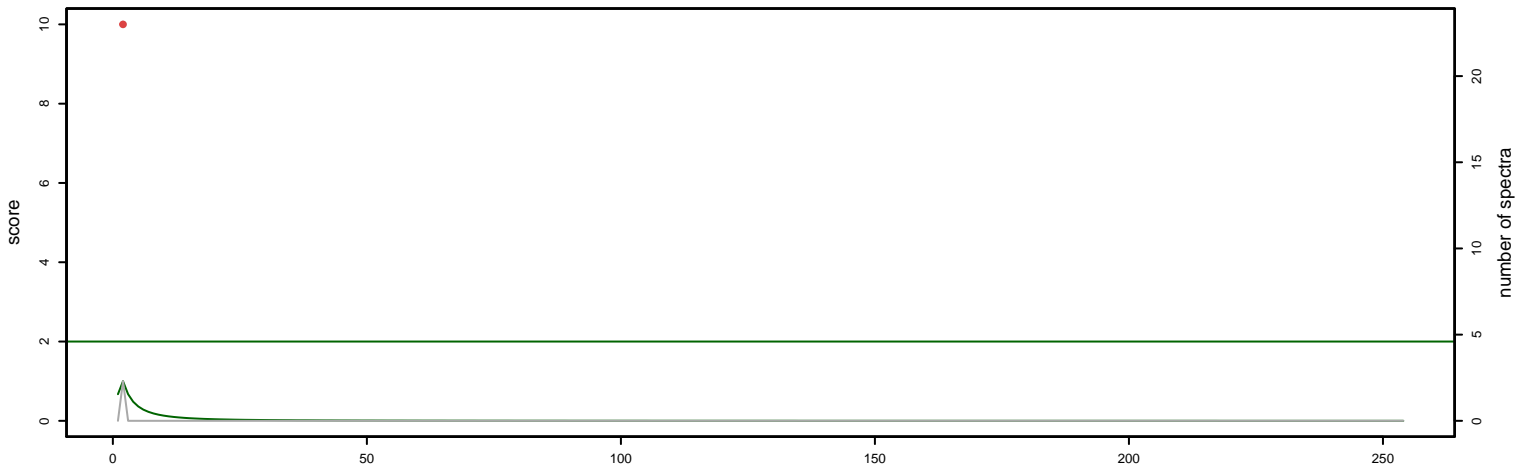

replica

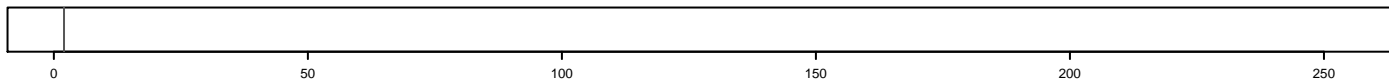

stability

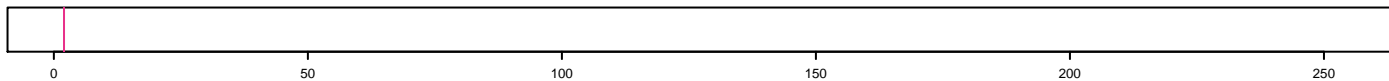

### Hexokinase-1 (P19367-2)

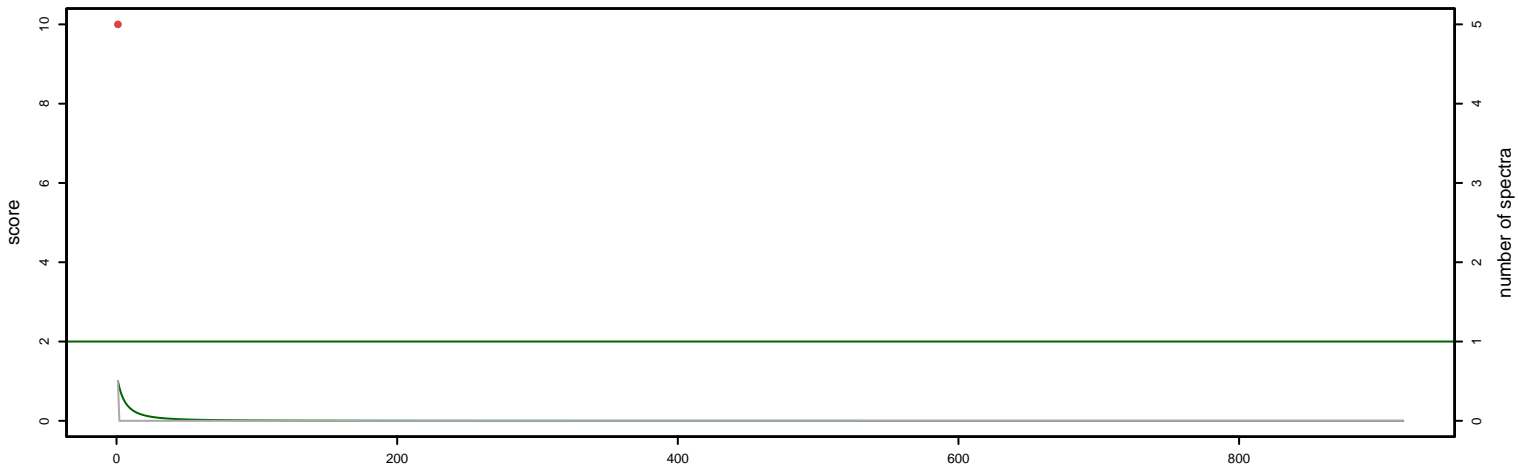

replica

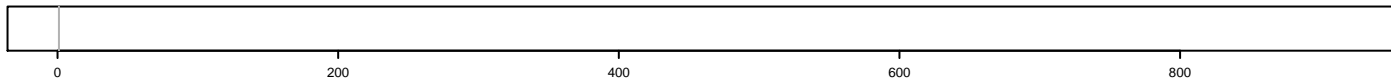

stability

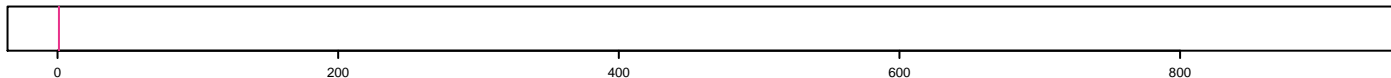

### Spermidine synthase (P19623)

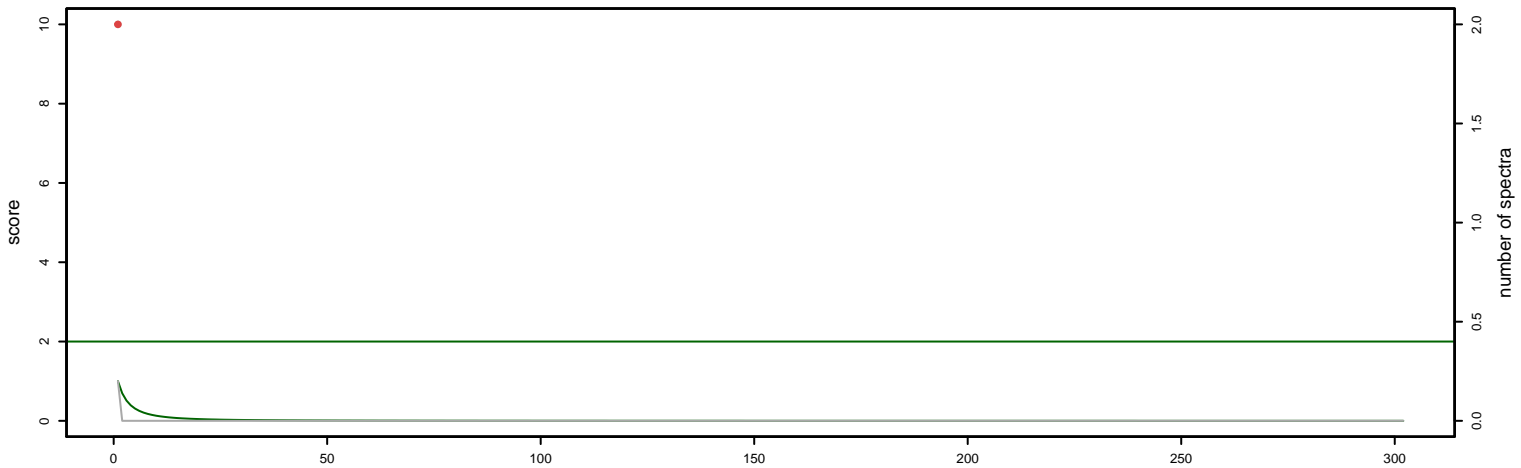

replica

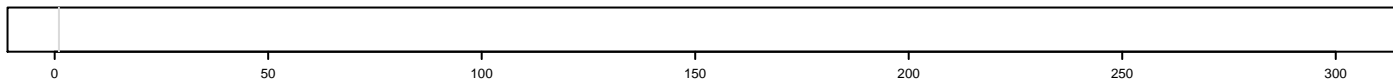

stability

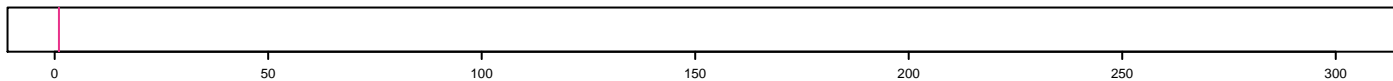



# Ras-related protein Rab-6A (P20340)

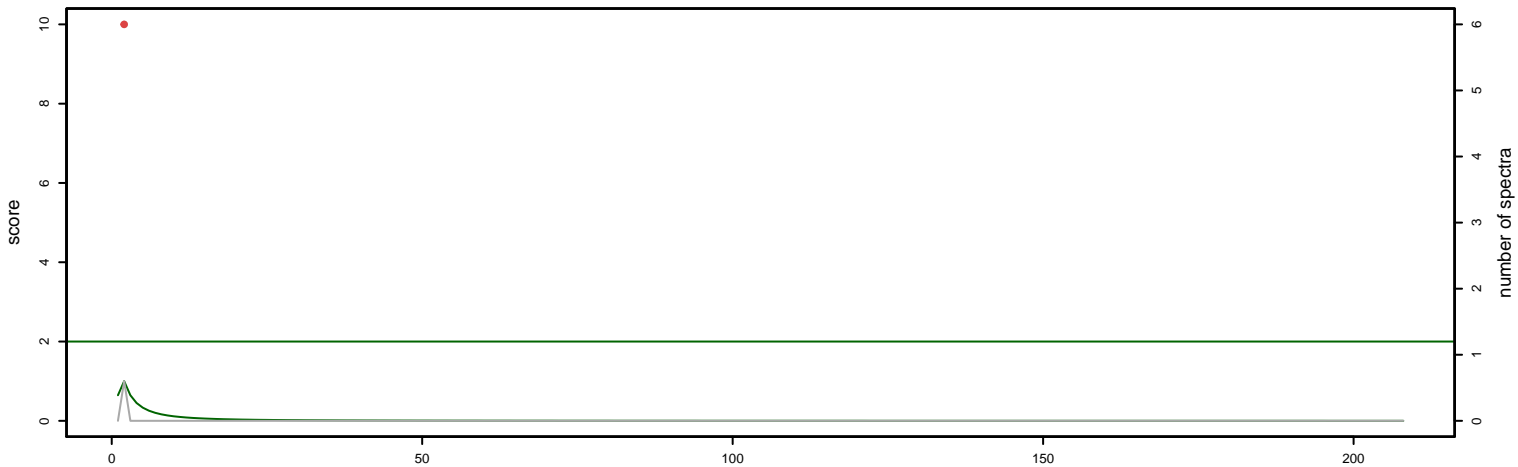

replica

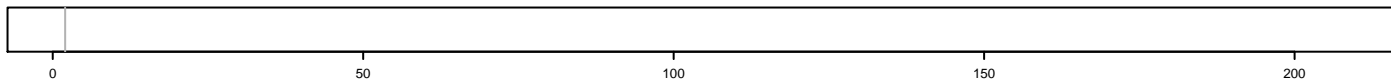

stability

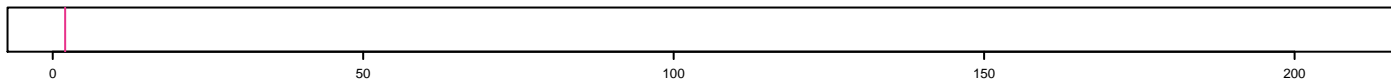

# Proteasome subunit beta type-1 (P20618)

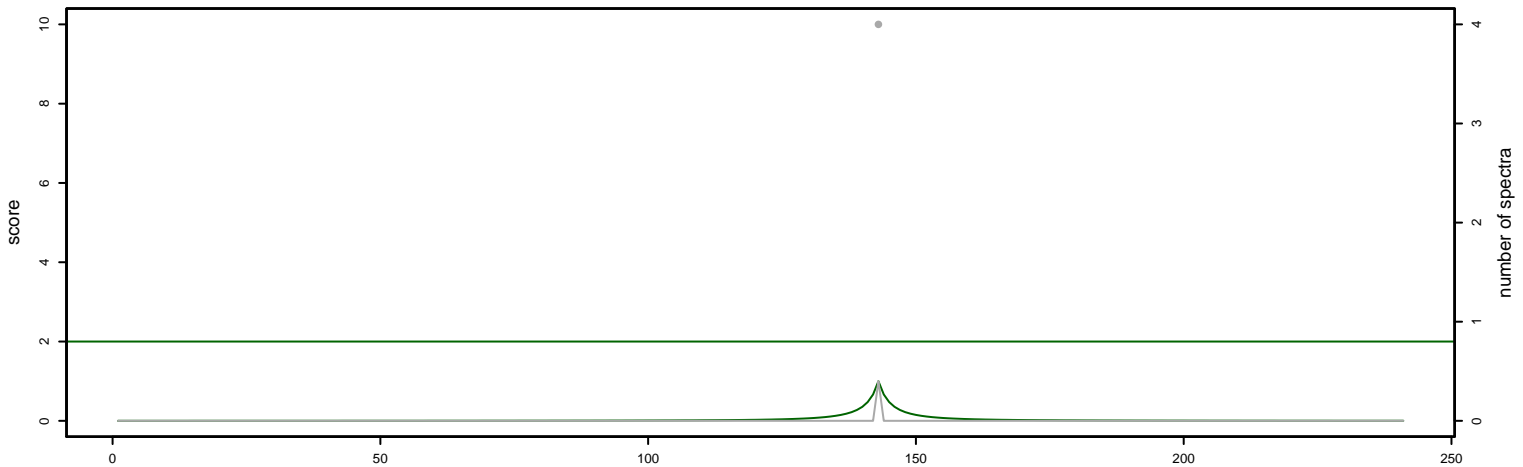

replica

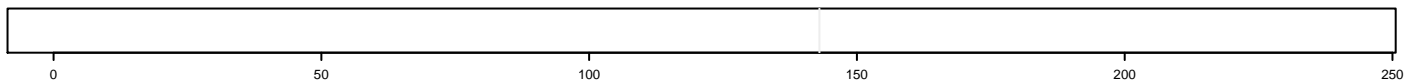

stability

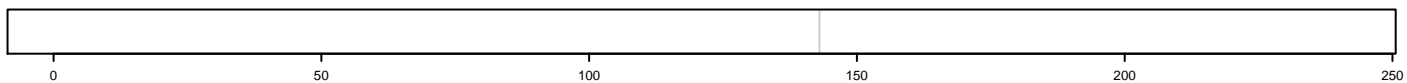

# Calpastatin (P20810)

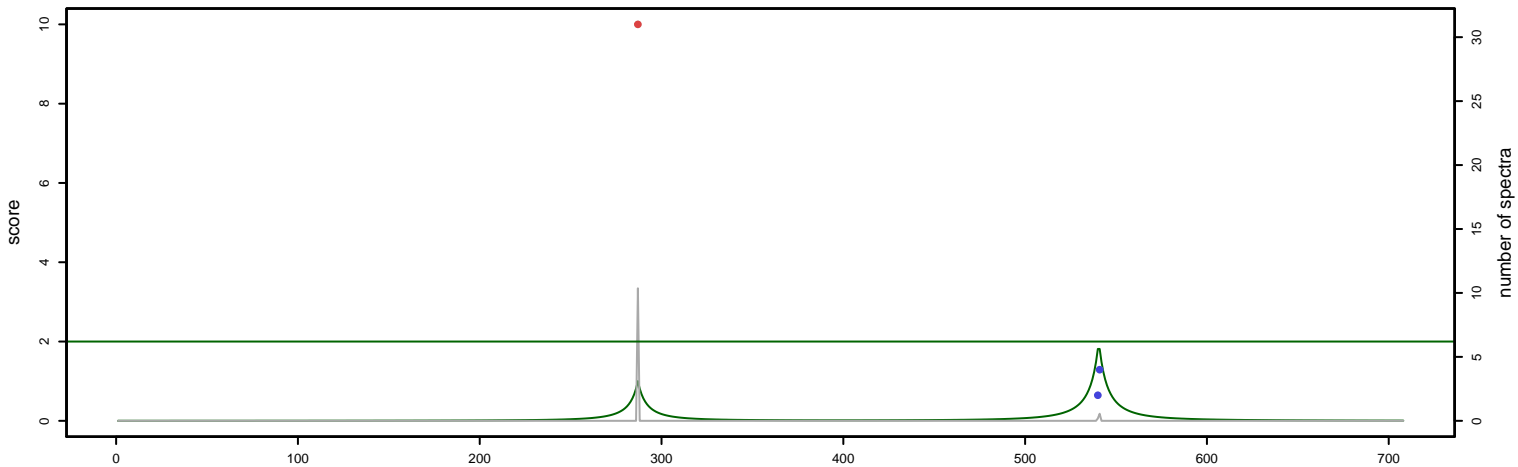

## replica

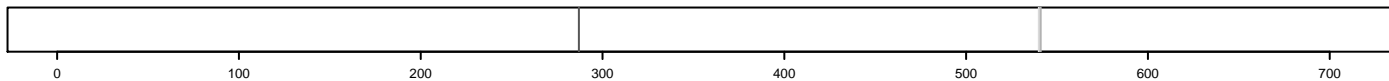

## stability

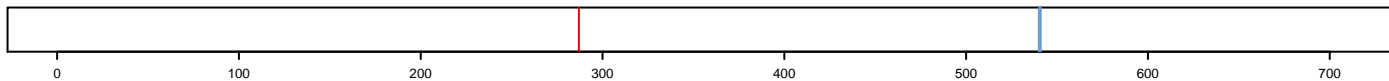

### Glutathione S-transferase Mu 3 (P21266)

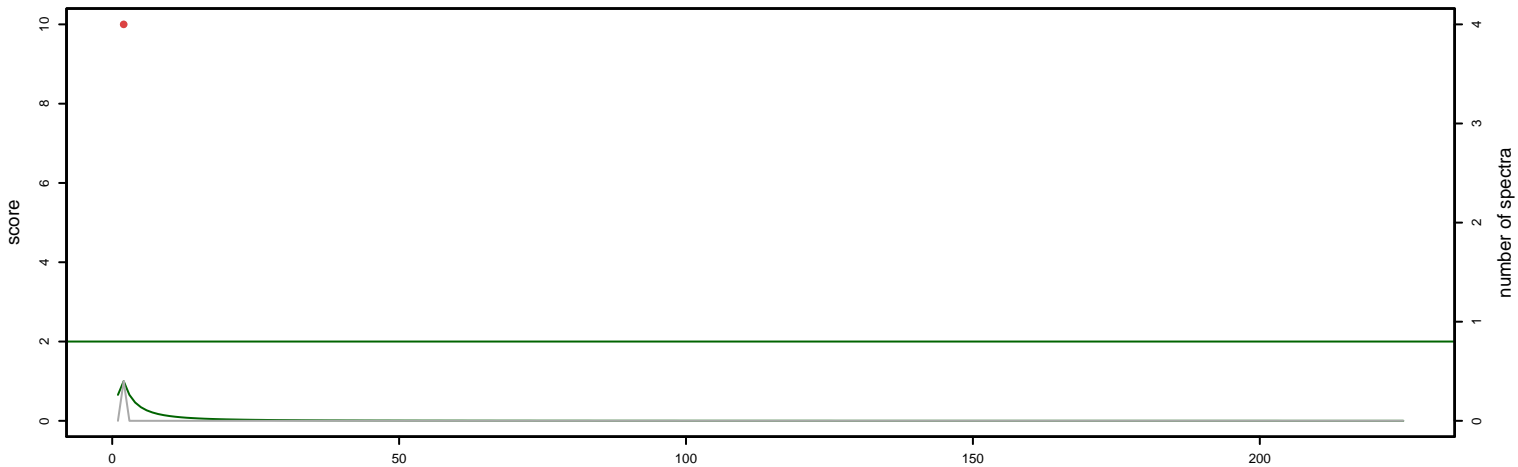

replica

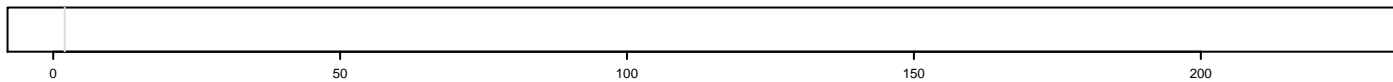

stability

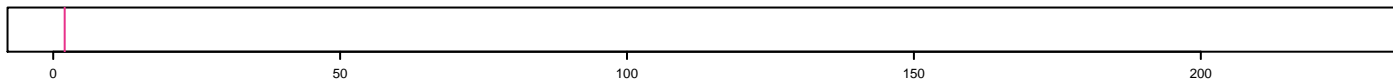

### V-type proton ATPase subunit B, brain isoform (P21281)

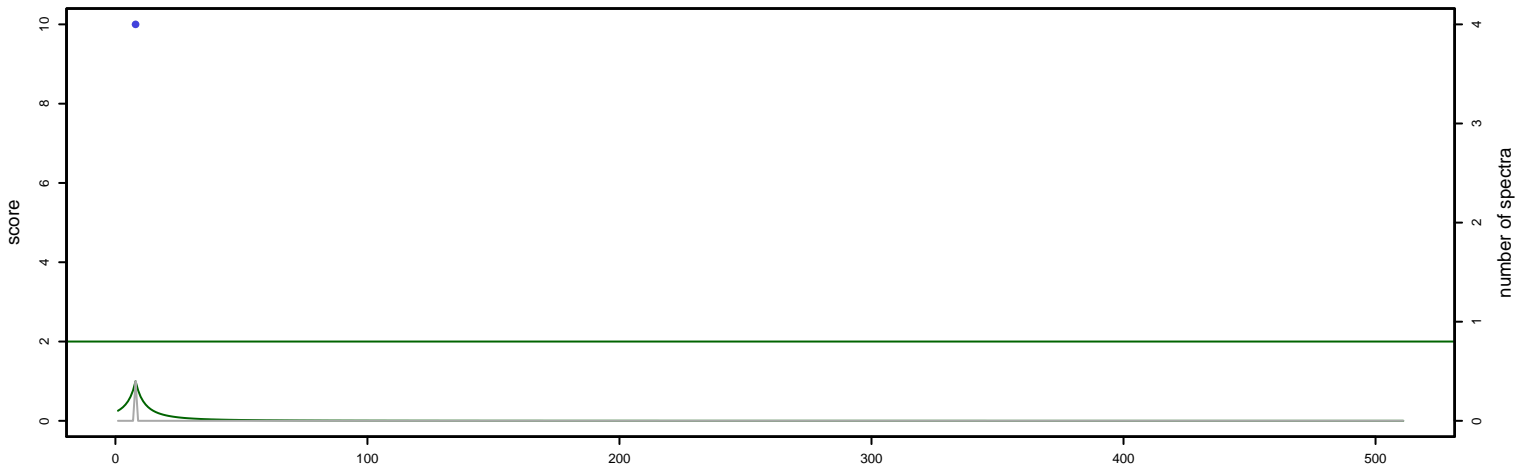

replica

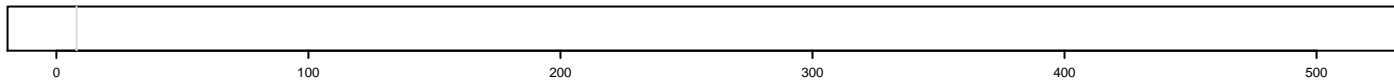

stability

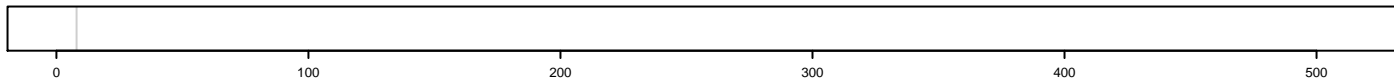

Protein-glutamine gamma-glutamyltransferase 2 (P21980)

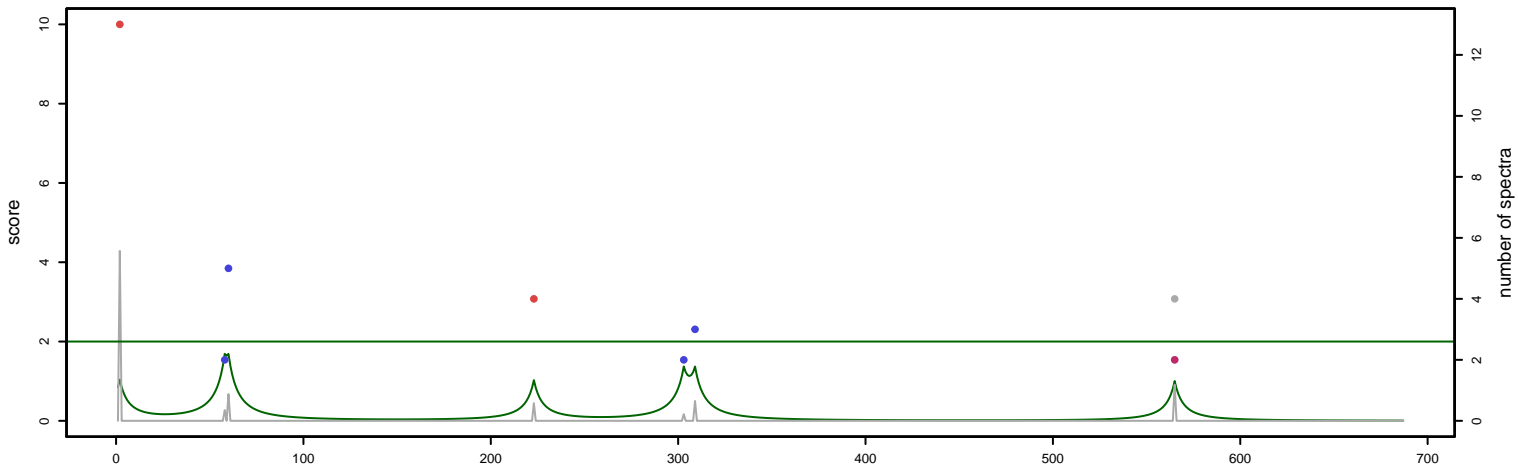

replica

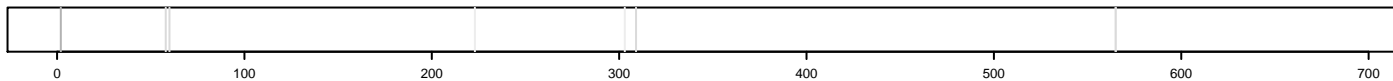

stability

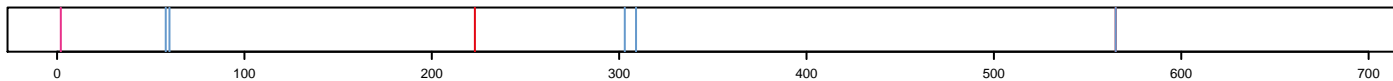

Protein-L-isoaspartate(D-aspartate) O-methyltransferase (P22061)

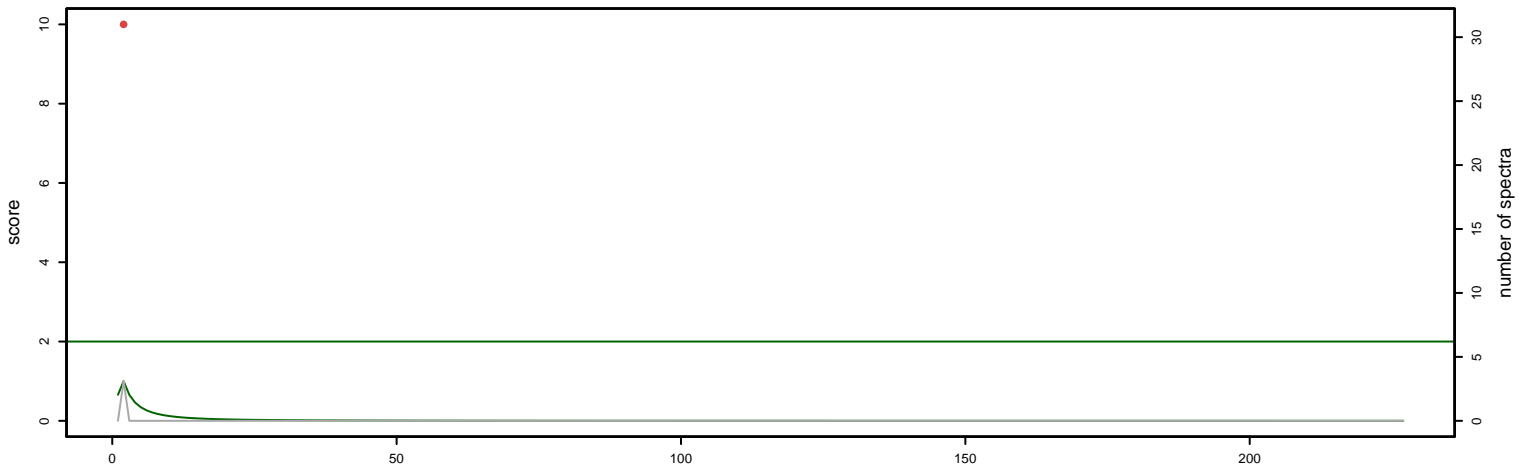

replica

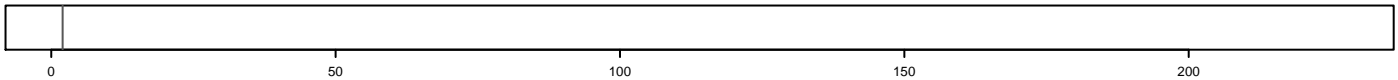

stability

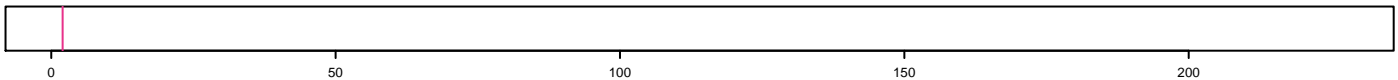

# Multifunctional protein ADE2 (P22234)

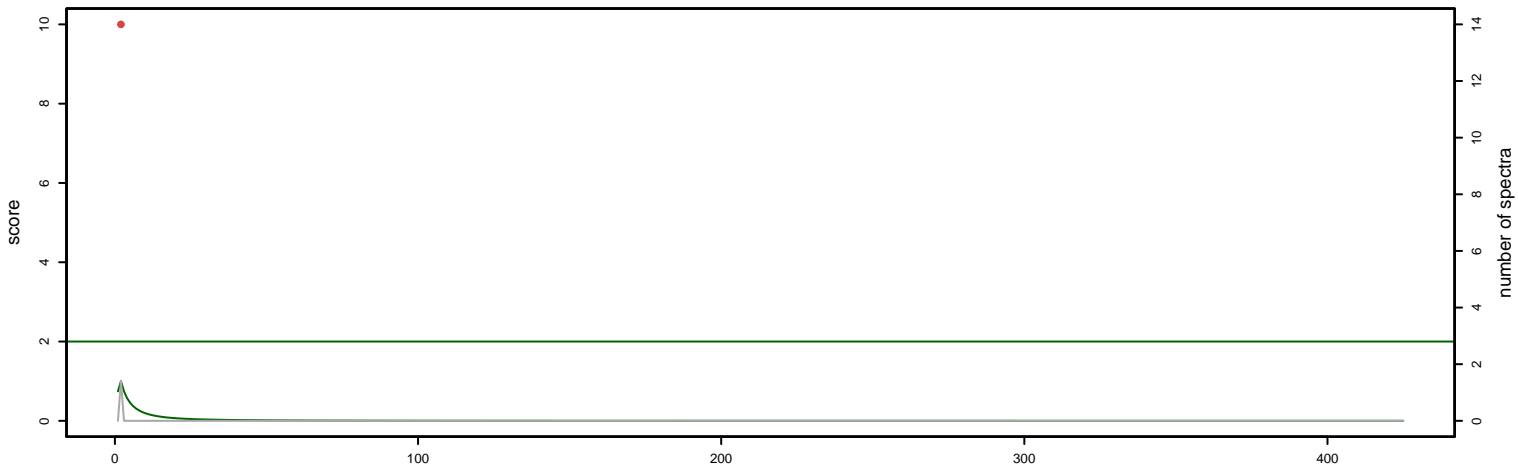

replica

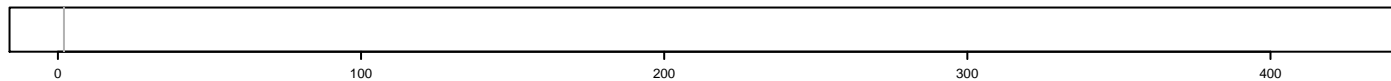

stability

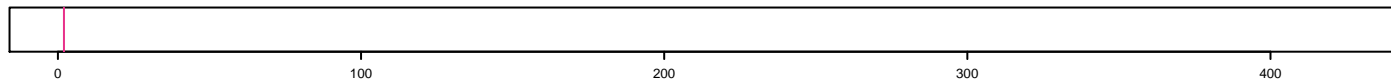



# Ubiquitin-like modifier-activating enzyme 1 (P22314)

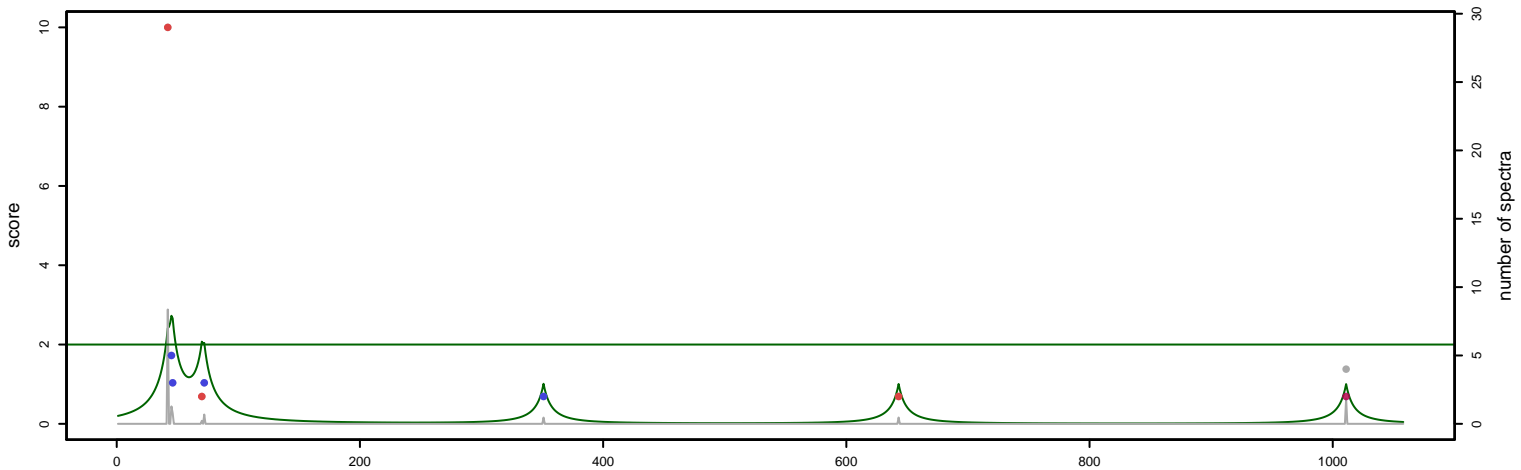

replica

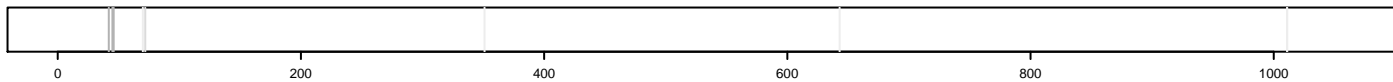

stability

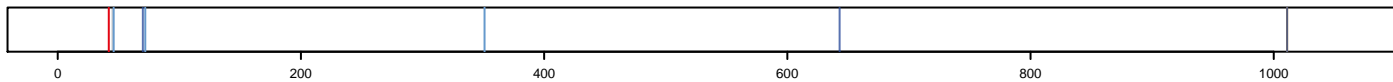

# Heterogeneous nuclear ribonucleoproteins A2/B1 (P22626)

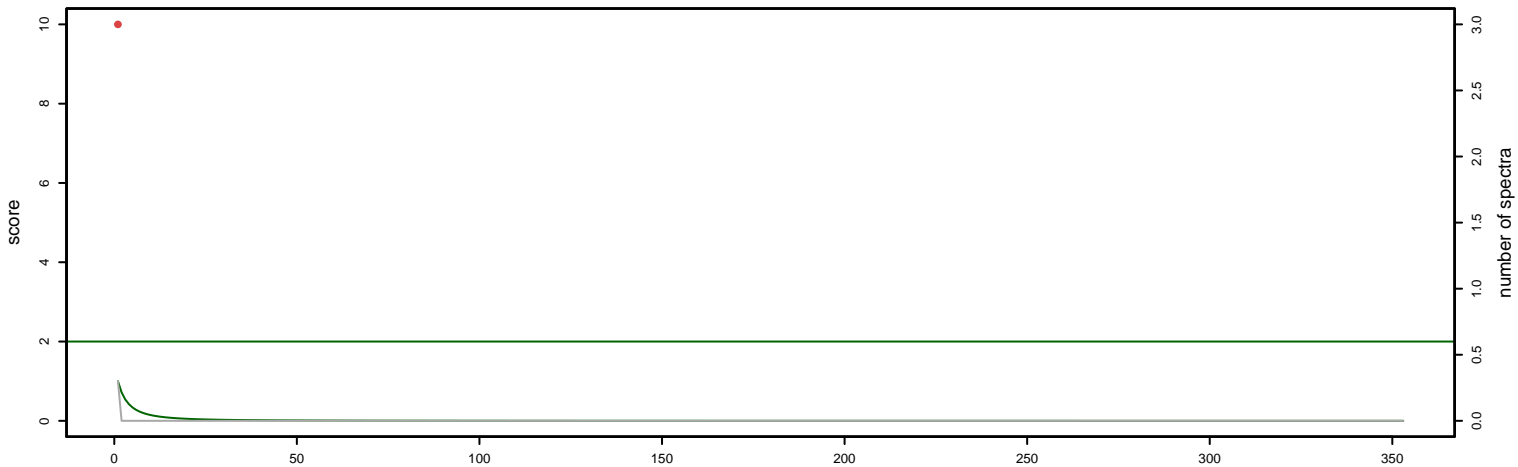

**replica**

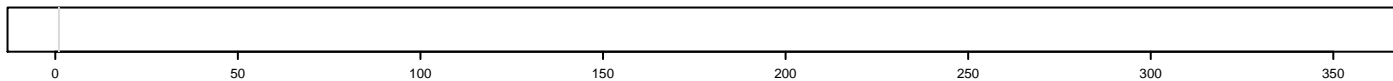

**stability**

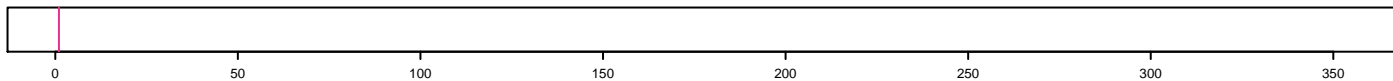

### Transcription elongation factor A protein 1 (P23193)

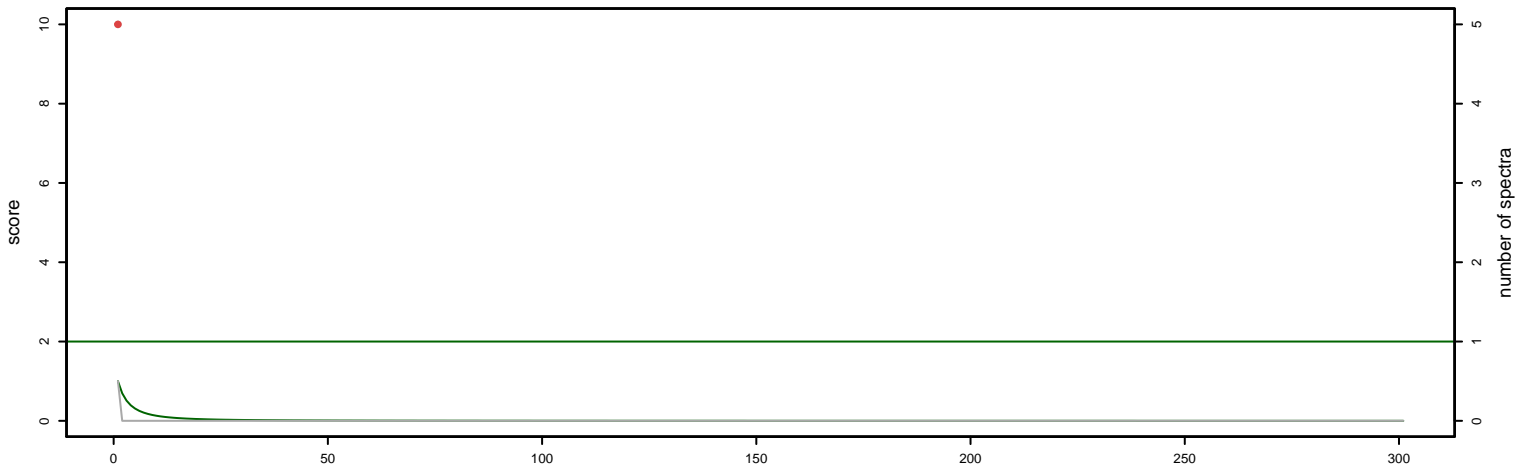

replica

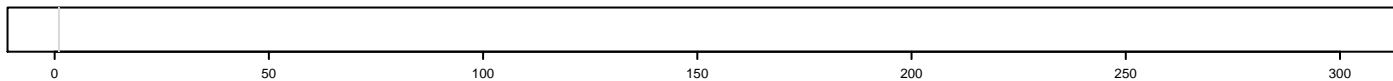

stability

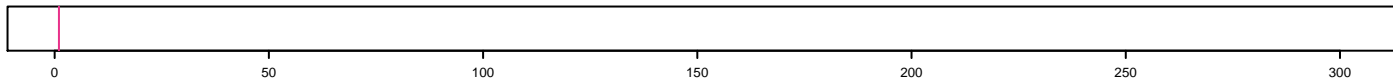

# Kell blood group glycoprotein (P23276)

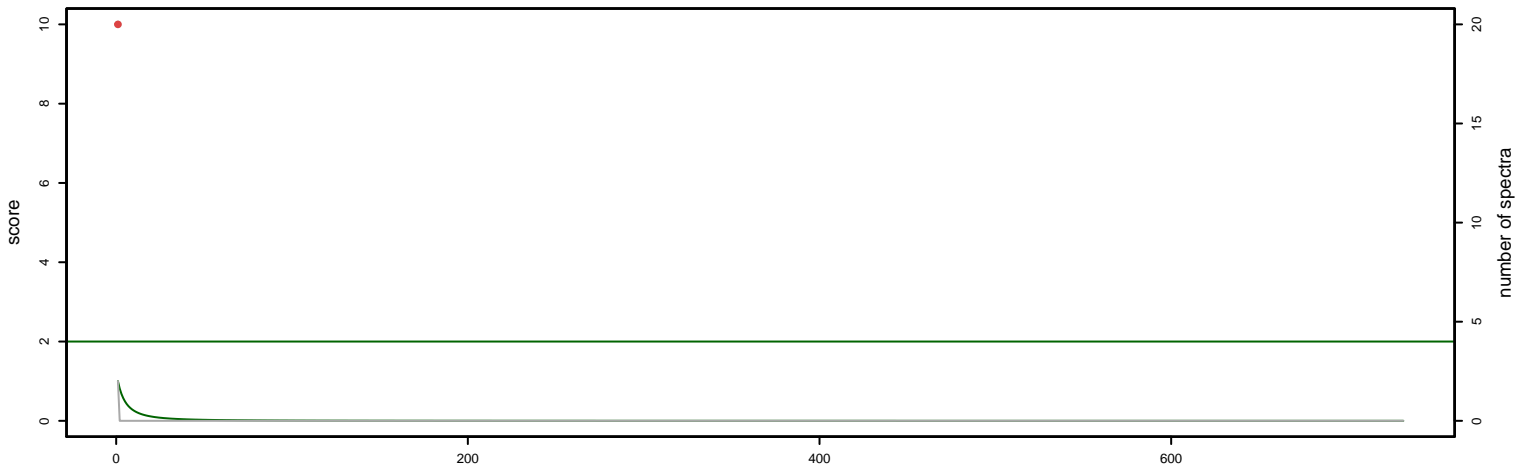

replica

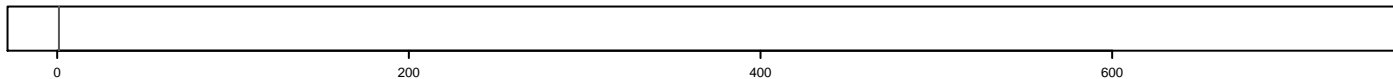

stability

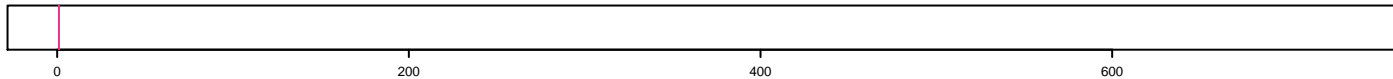

# Adenosylhomocysteinase (P23526)

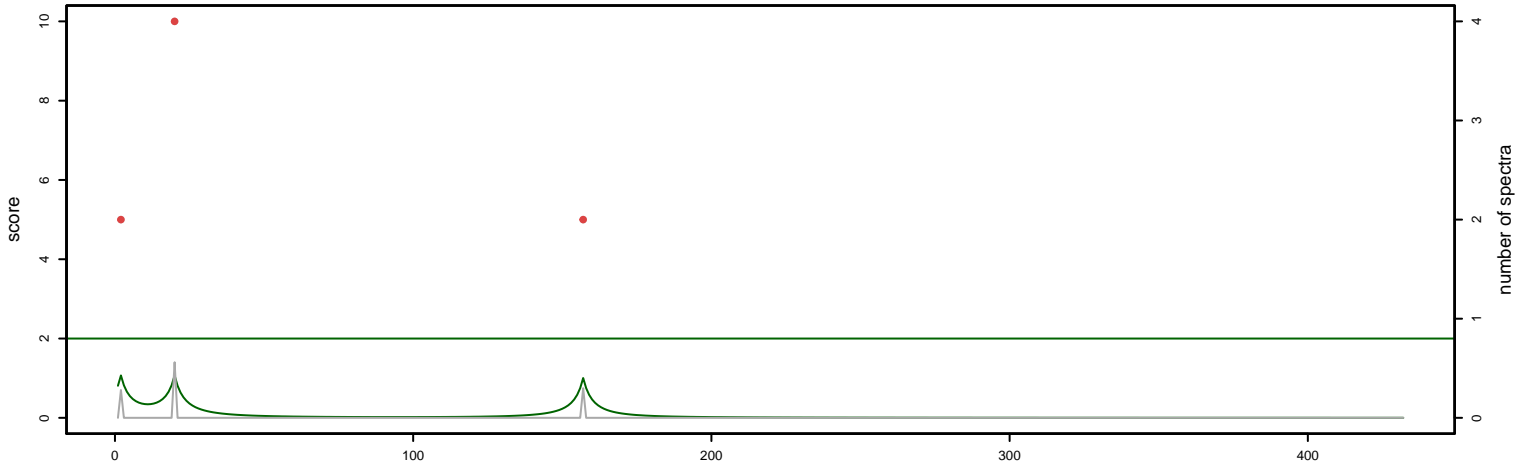

replica

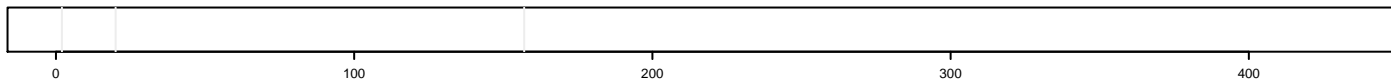

stability

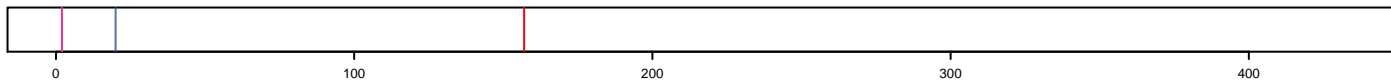

### Cofilin-1 (P23528)

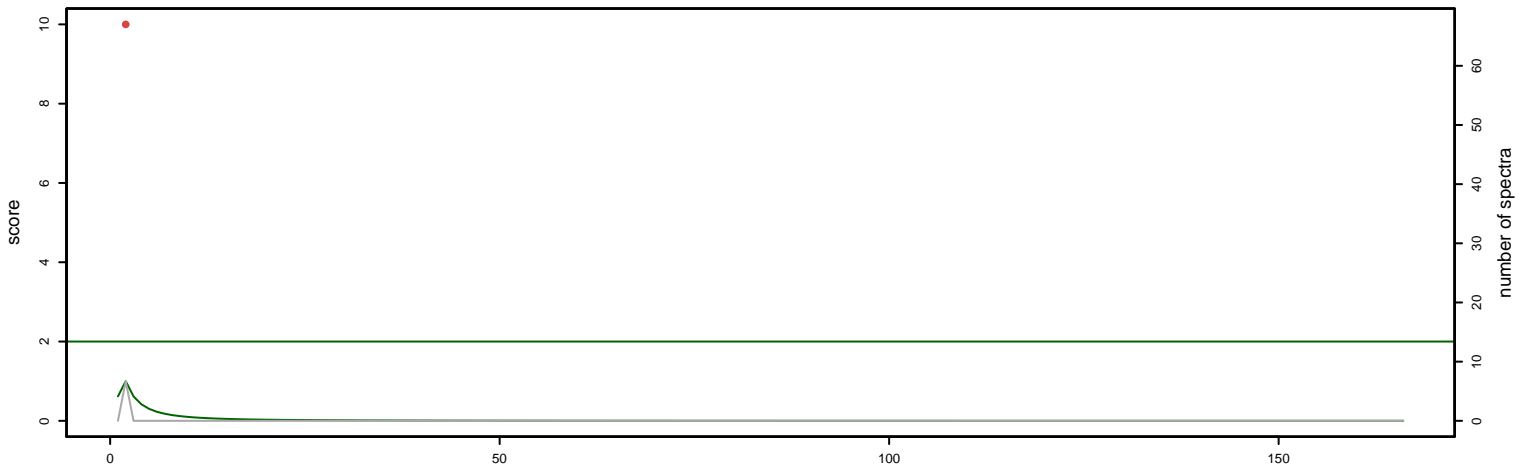

### replica

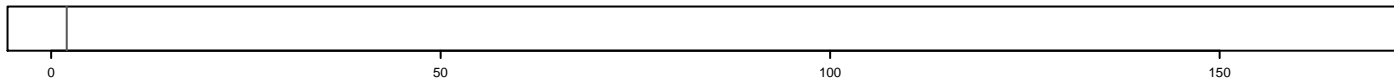

### stability

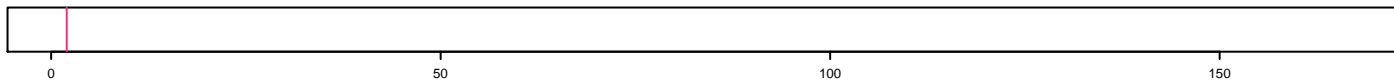

# Factor VIII intron 22 protein (P23610)

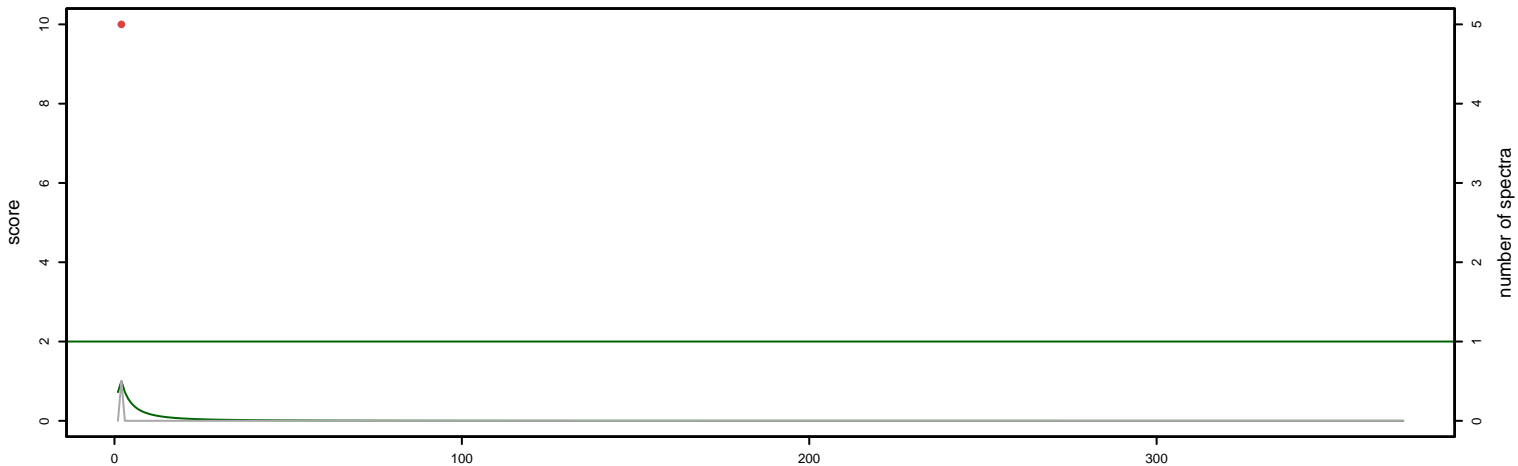

replica

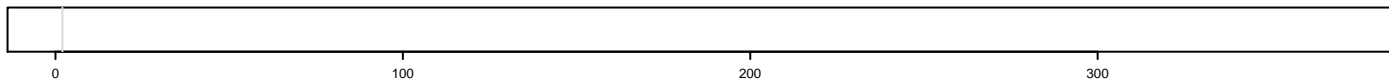

stability

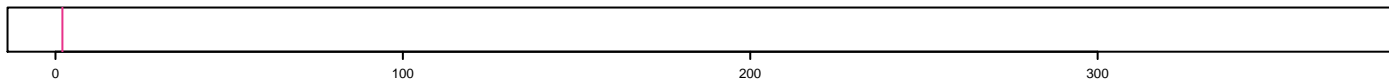

# Low molecular weight phosphotyrosine protein phosphatase (P24666)

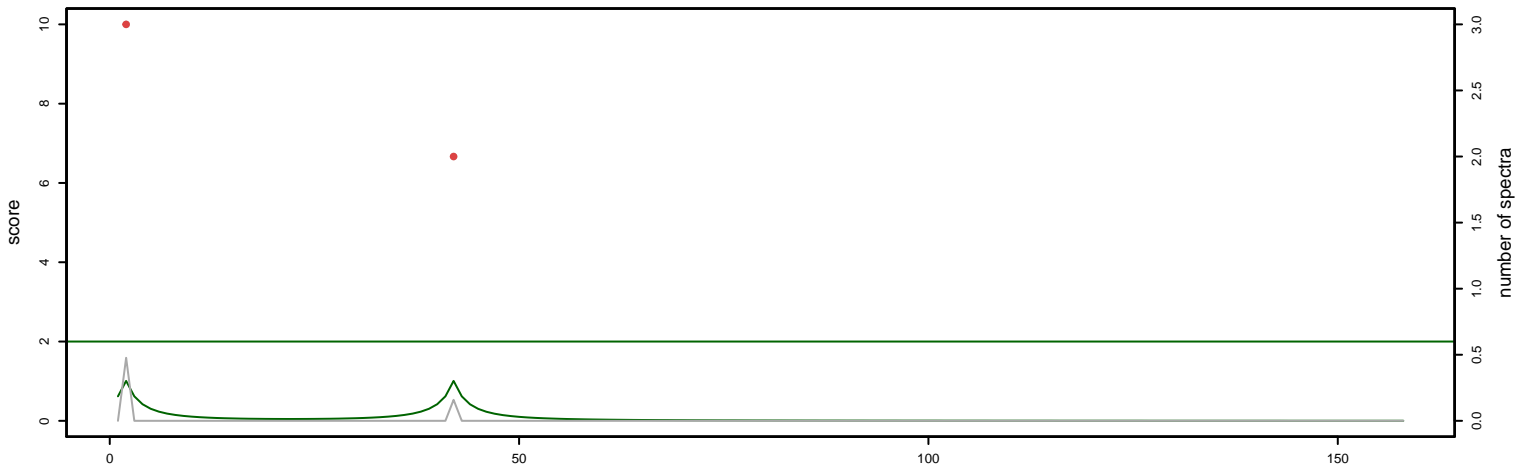

replica

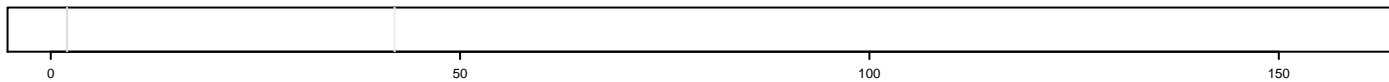

stability

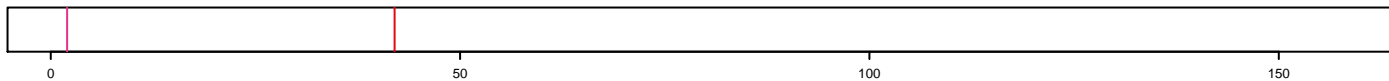



### DnaJ homolog subfamily B member 1 (P25685)

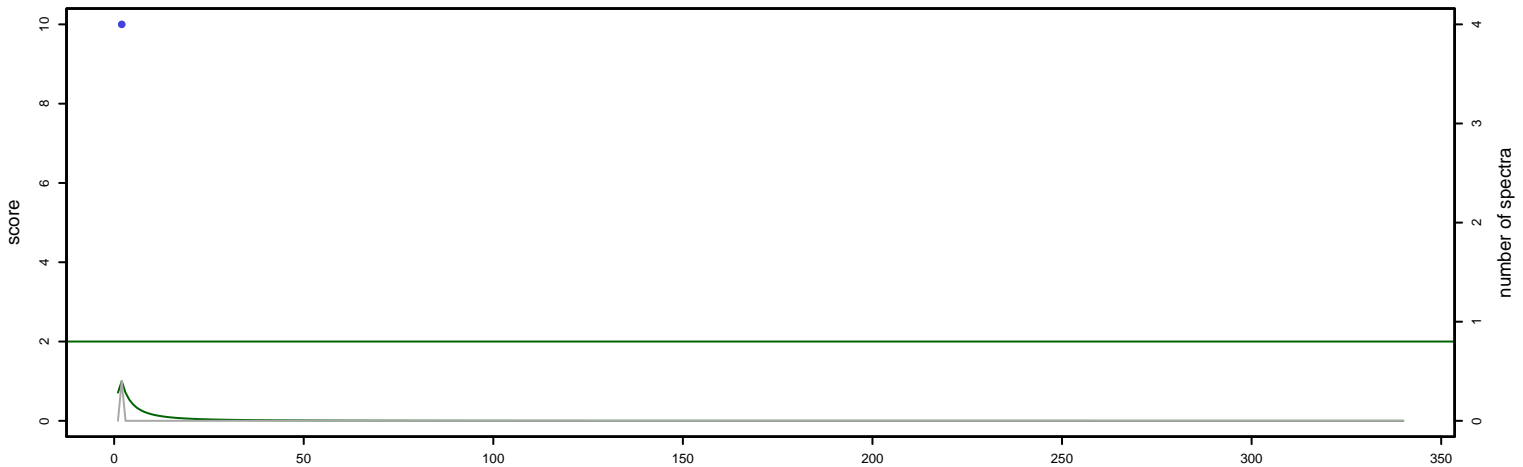

replica

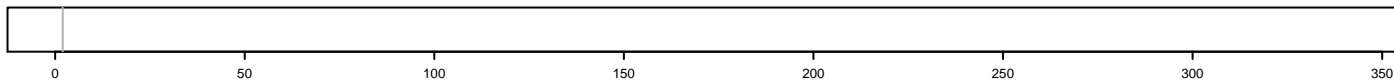

stability

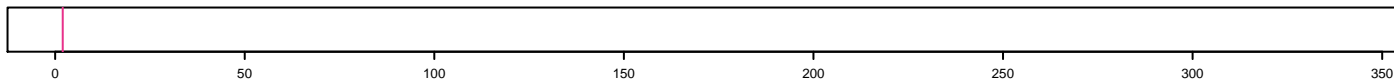

### DnaJ homolog subfamily B member 2 (P25686)

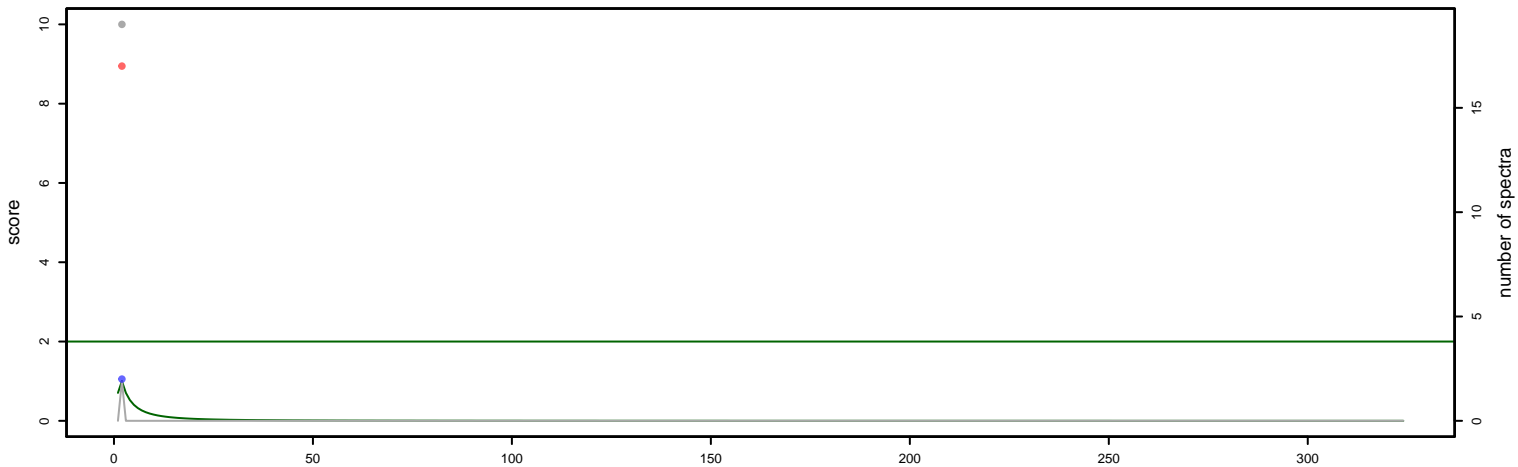

replica

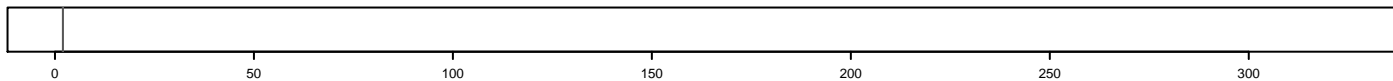

stability

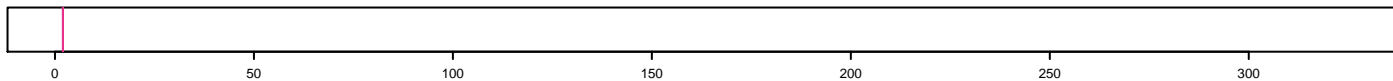

# Proteasome subunit alpha type-1 (P25786)

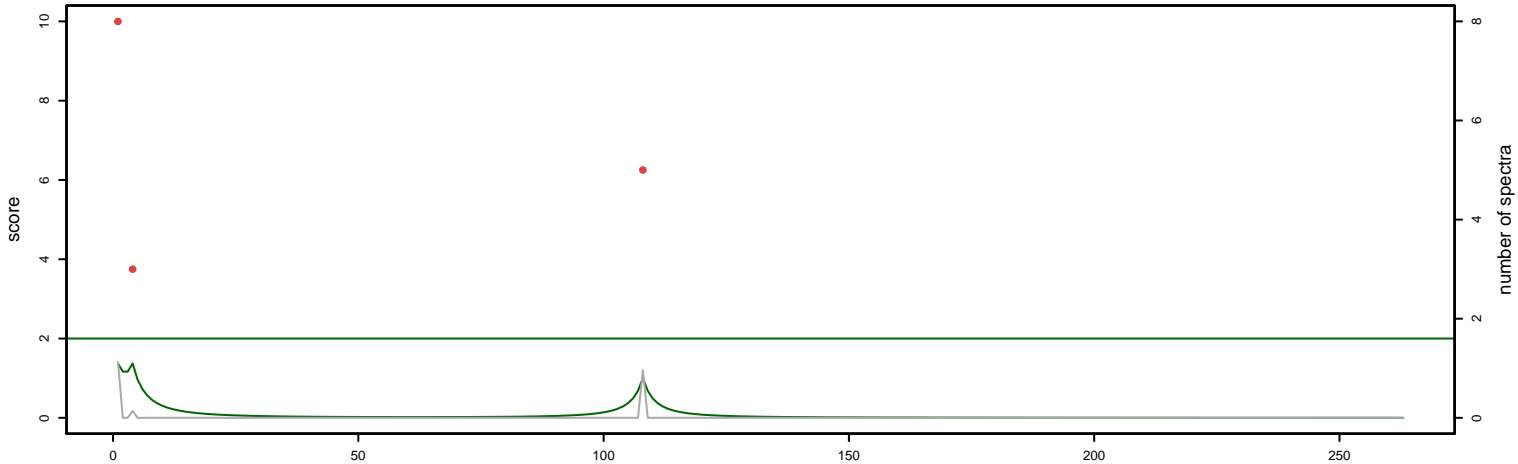

replica

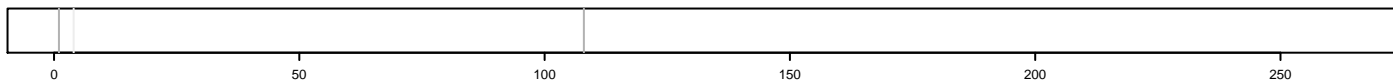

stability

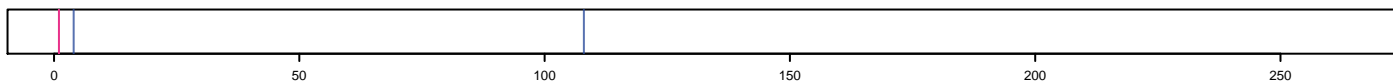

# Proteasome subunit alpha type-3 (P25788)

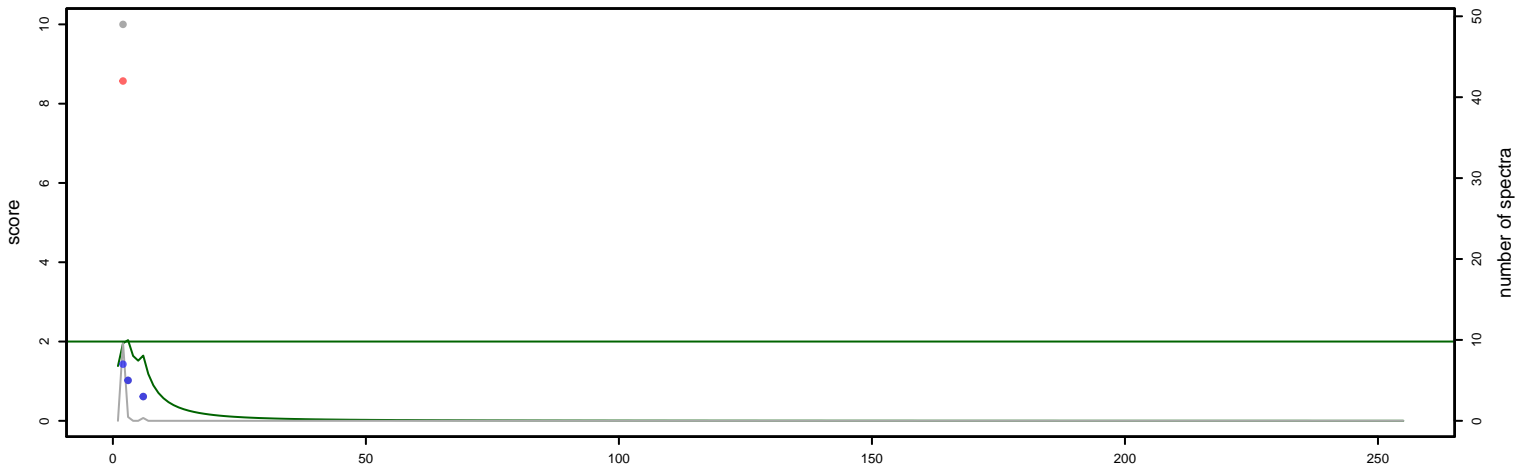

replica

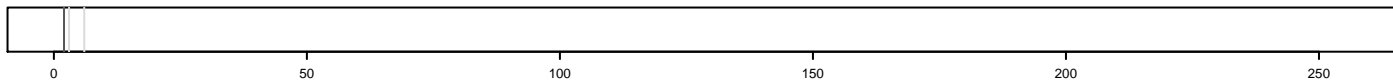

stability

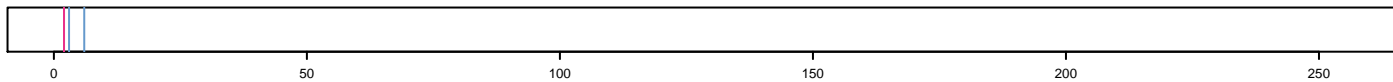

### Proteasome subunit alpha type-4 (P25789)

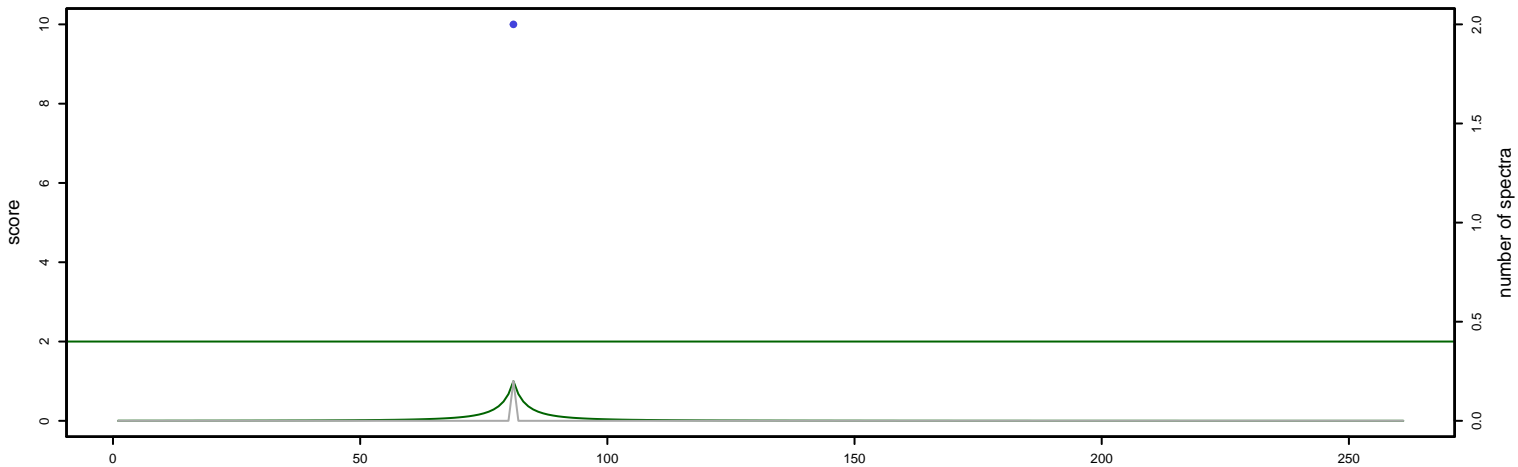

replica

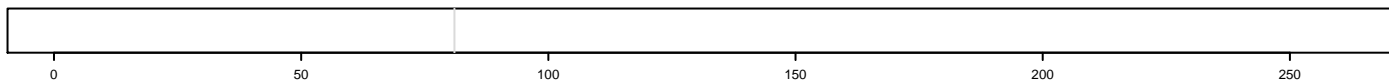

stability

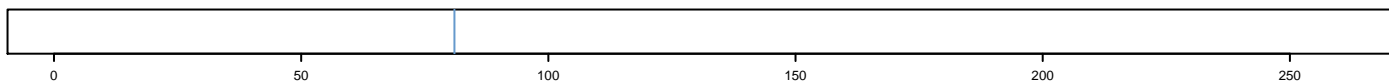

Protein S100-A4 (P26447)

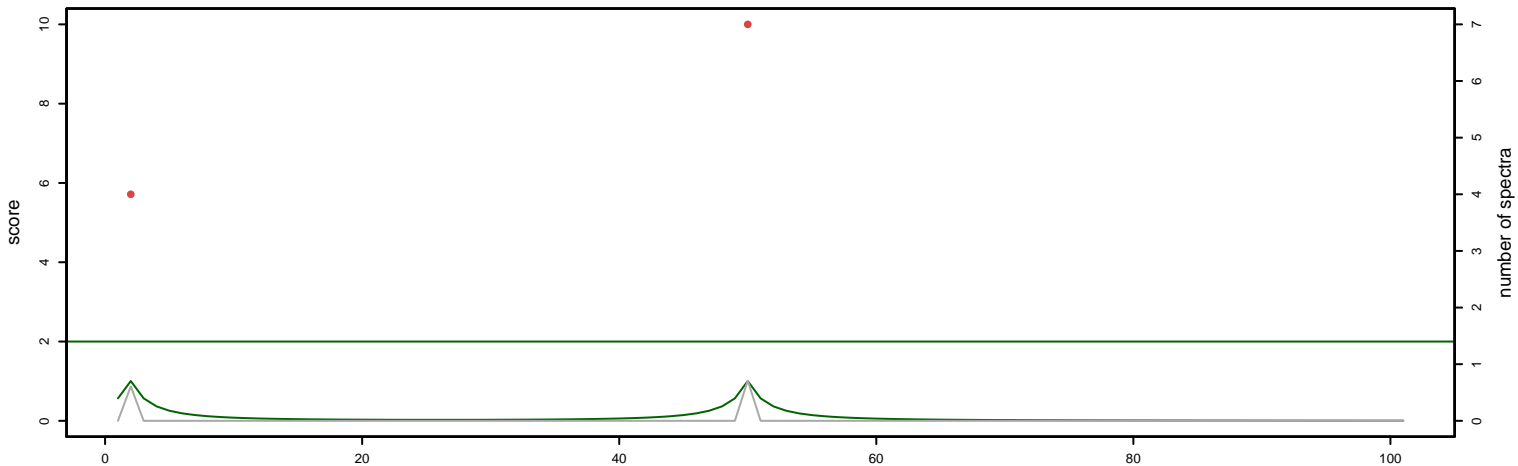

replica

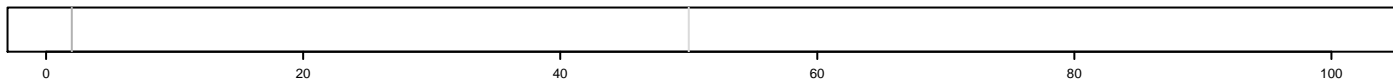

stability

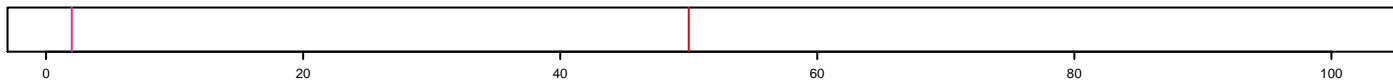

### Threonine--tRNA ligase, cytoplasmic (P26639)

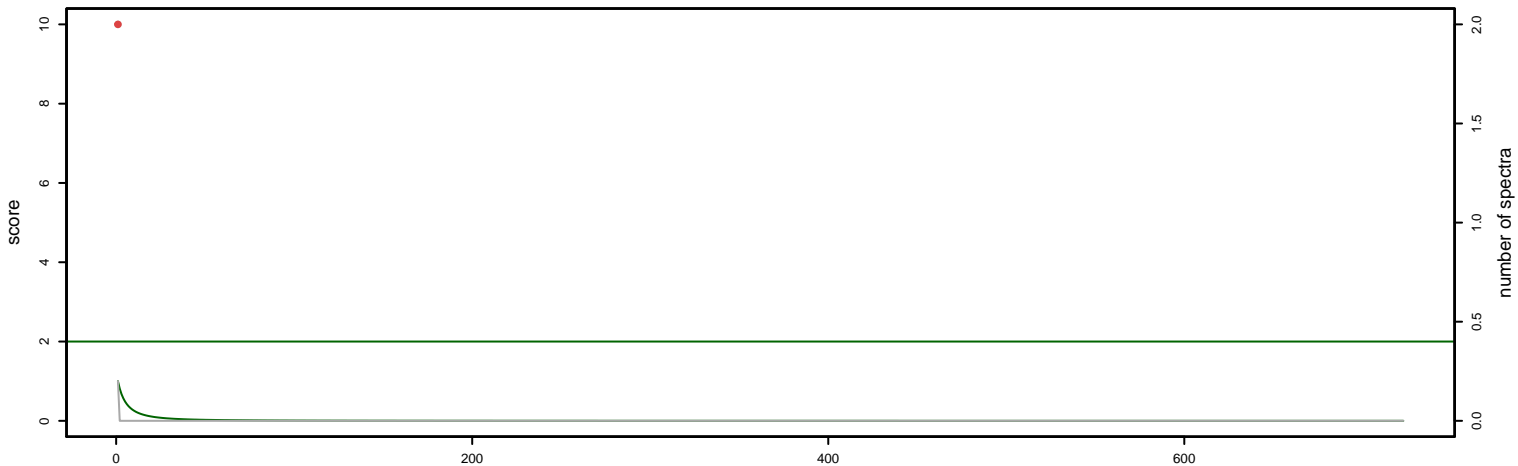

replica

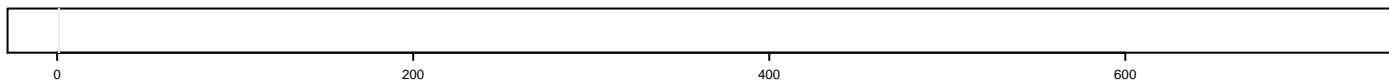

stability

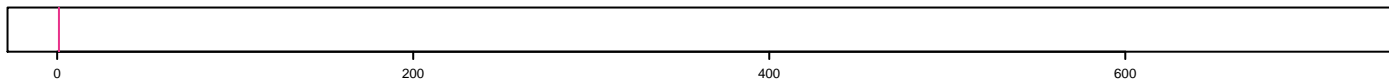

### Erythrocyte band 7 integral membrane protein (P27105)

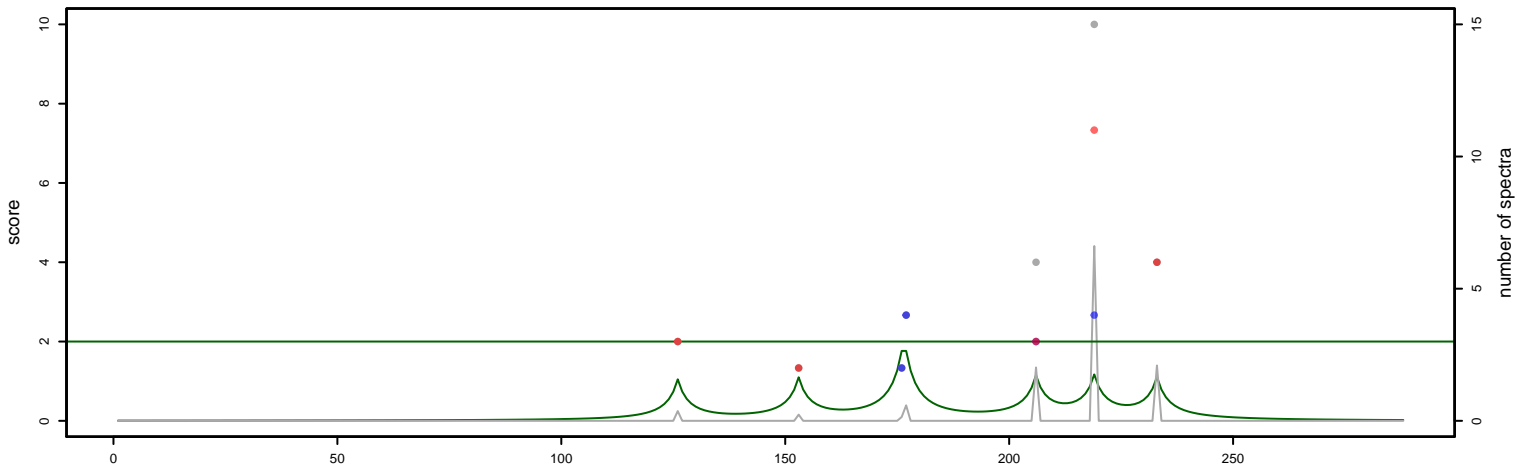

replica

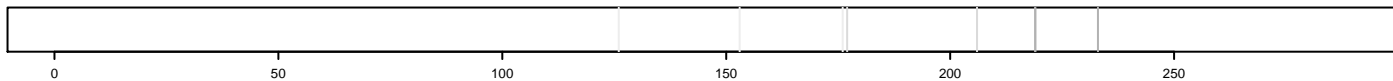

stability

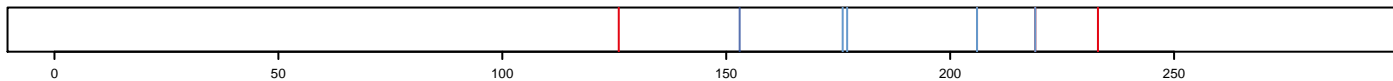



# 14-3-3 protein theta (P27348)

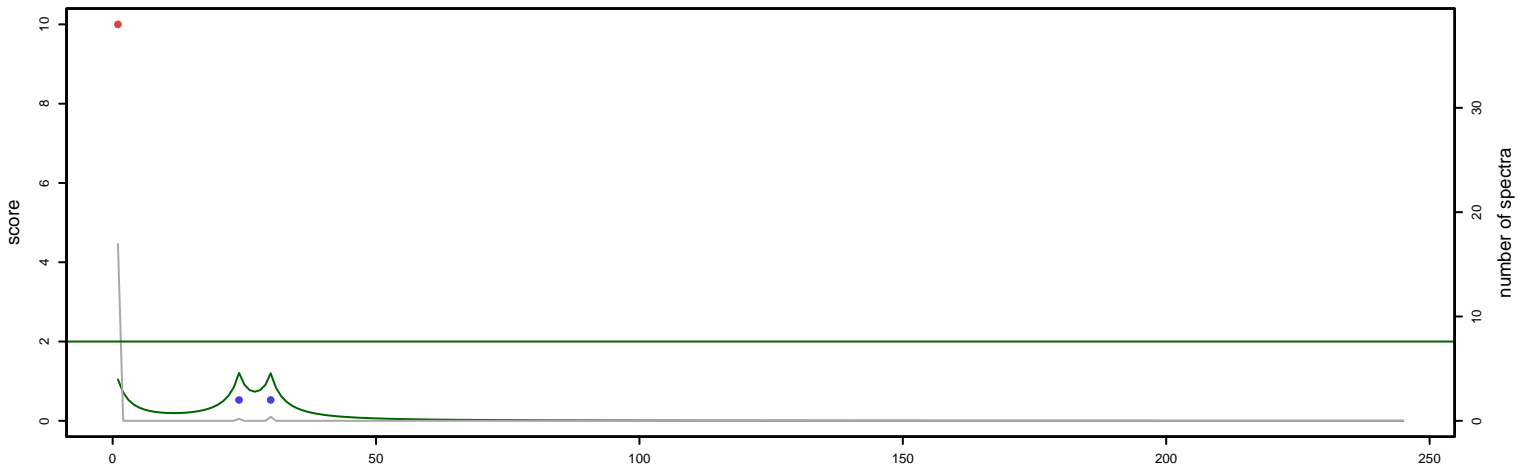

replica

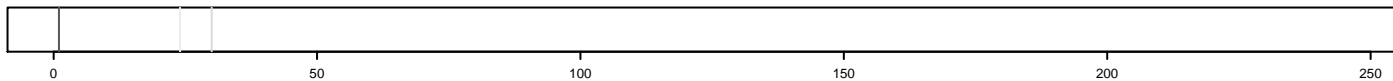

stability

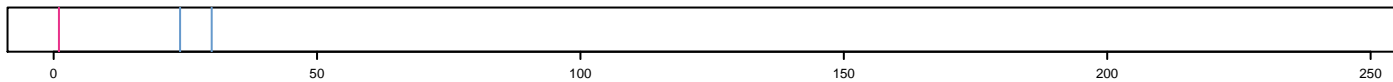

# Mitogen-activated protein kinase 3 (P27361)

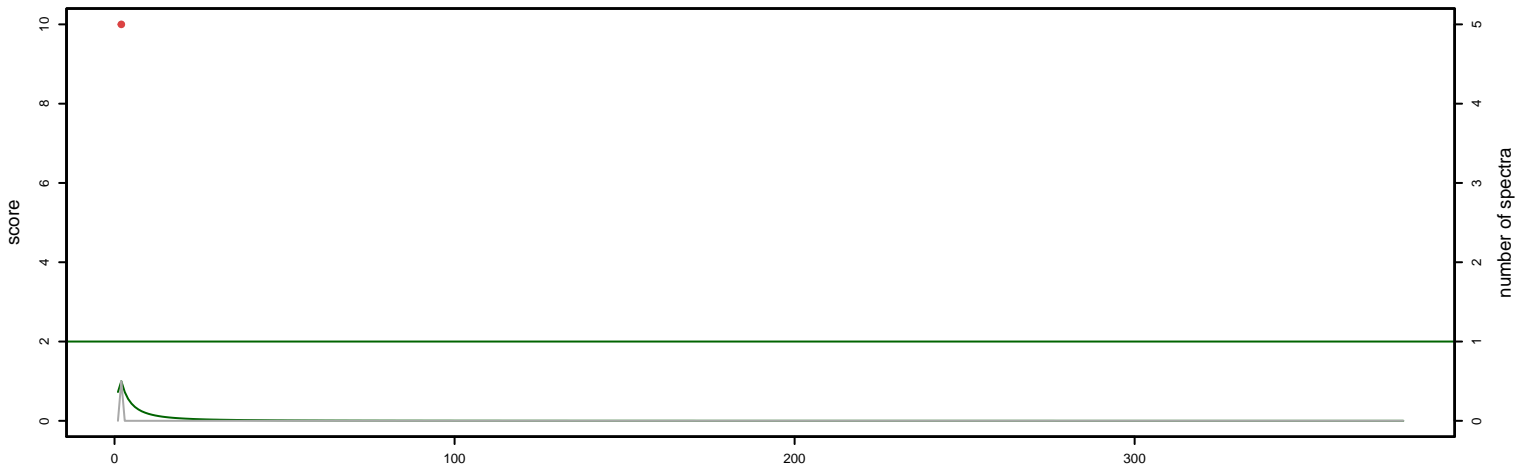

replica

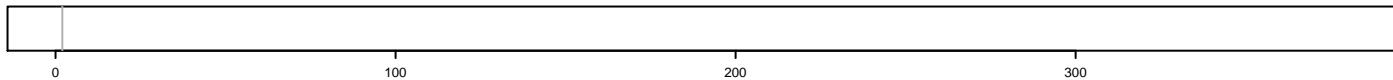

stability

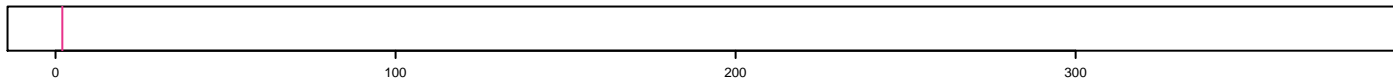

# CAD protein (P27708)

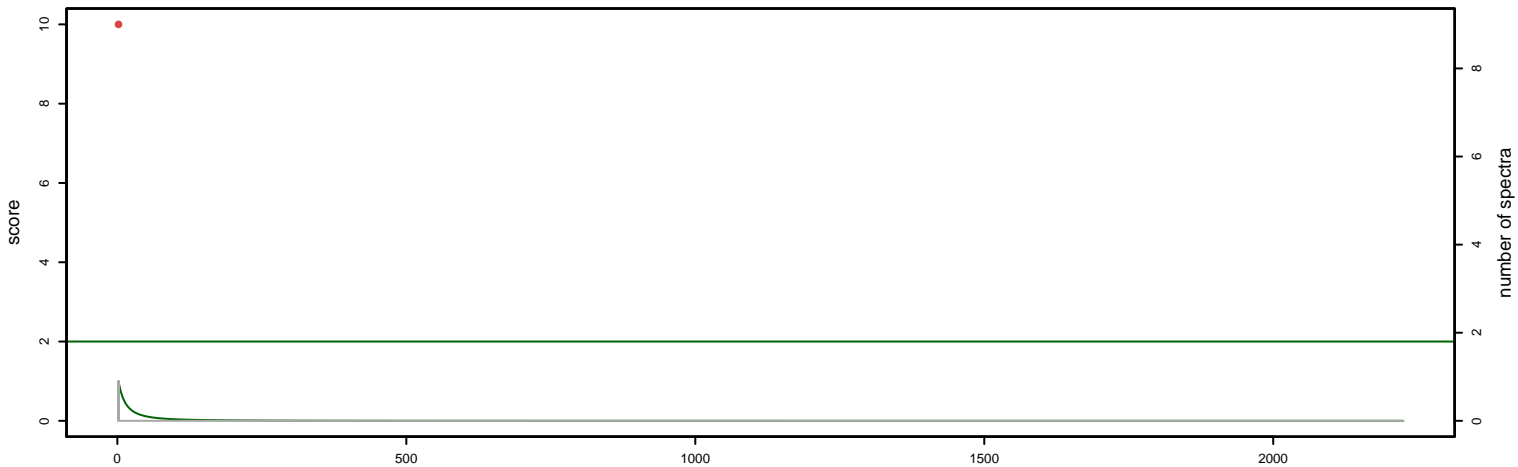

## replica

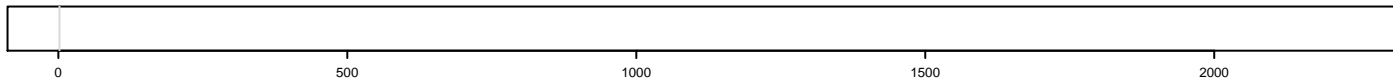

## stability

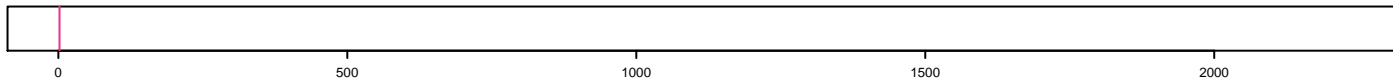

# Calreticulin (P27797)

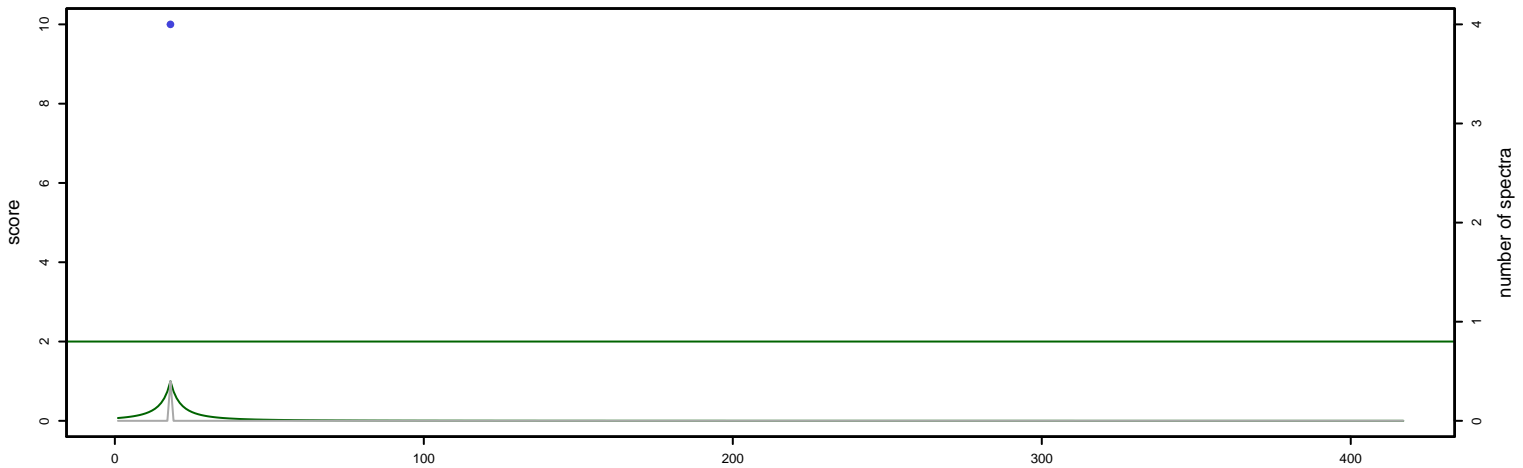

## replica

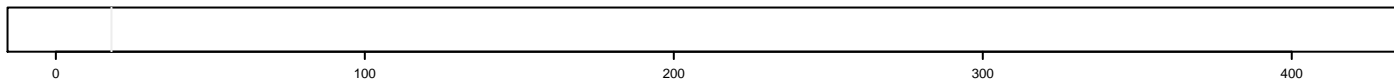

## stability

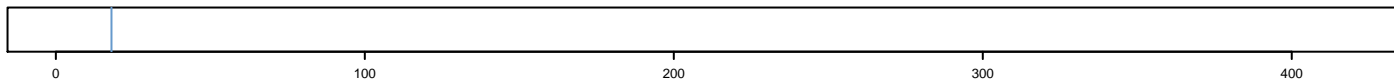

# Phosphatidylinositol 3-kinase regulatory subunit alpha (P27986)

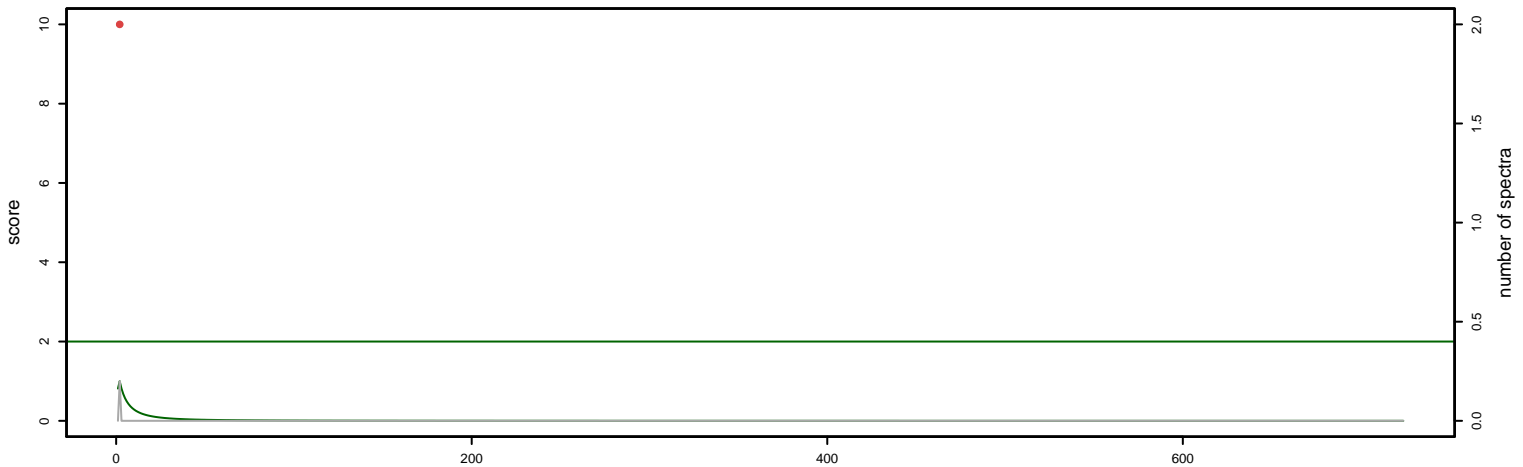

replica

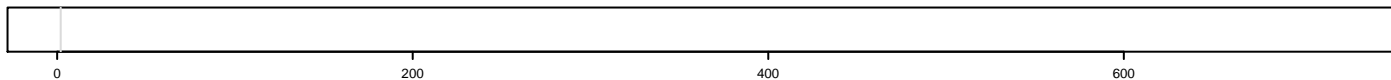

stability

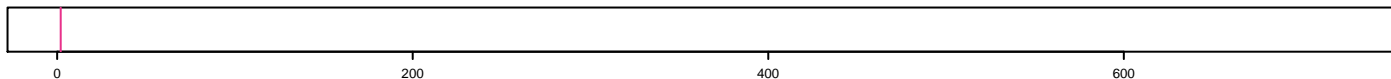

# Proteasome subunit beta type-9 (P28065)

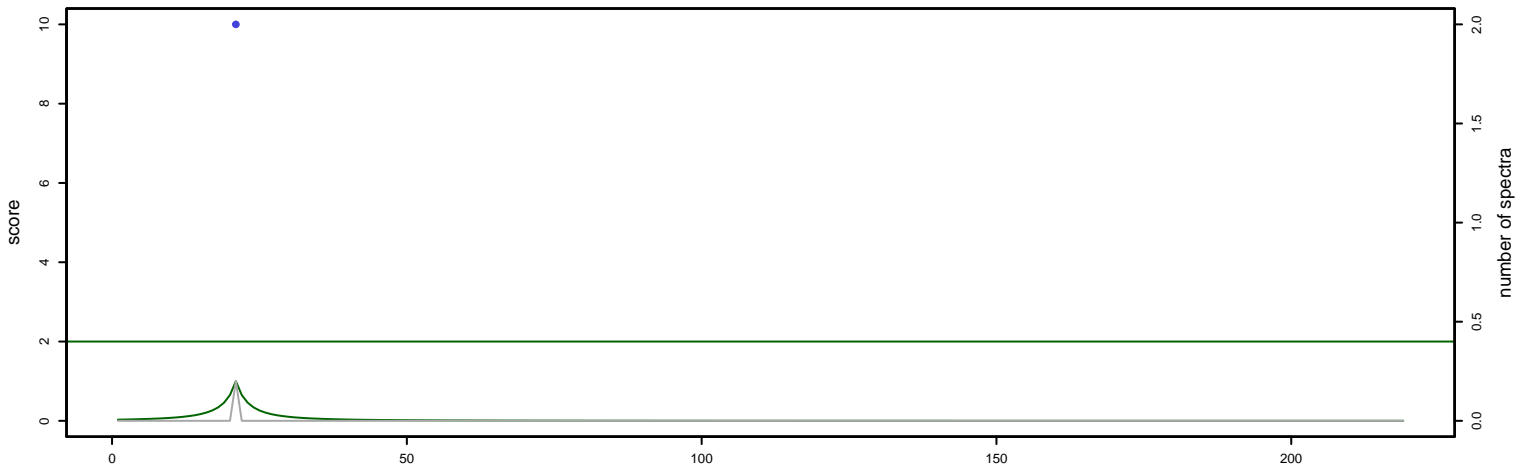

replica

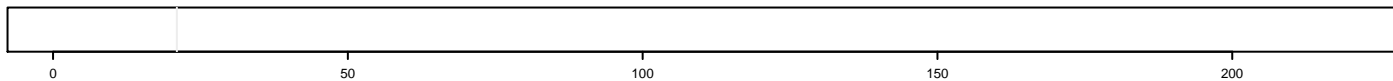

stability

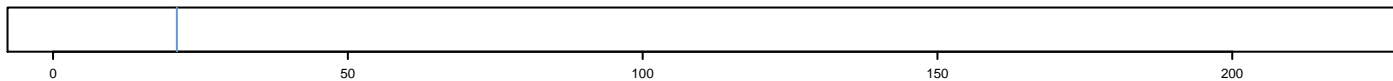

# Proteasome subunit alpha type-5 (P28066)

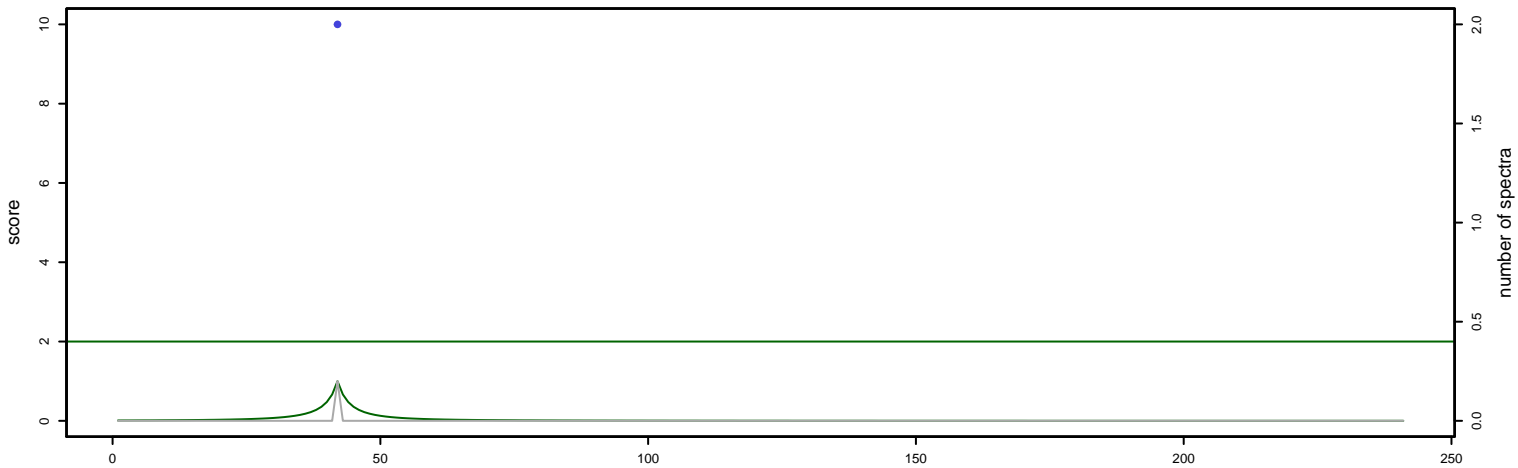

replica

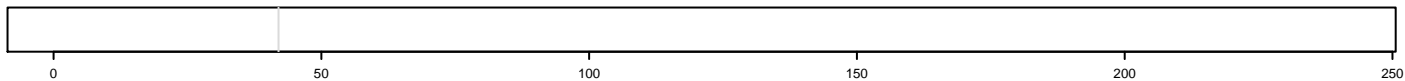

stability

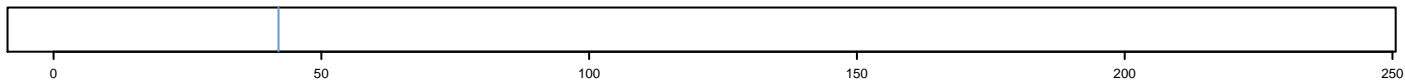

# Proteasome subunit beta type-4 (P28070)

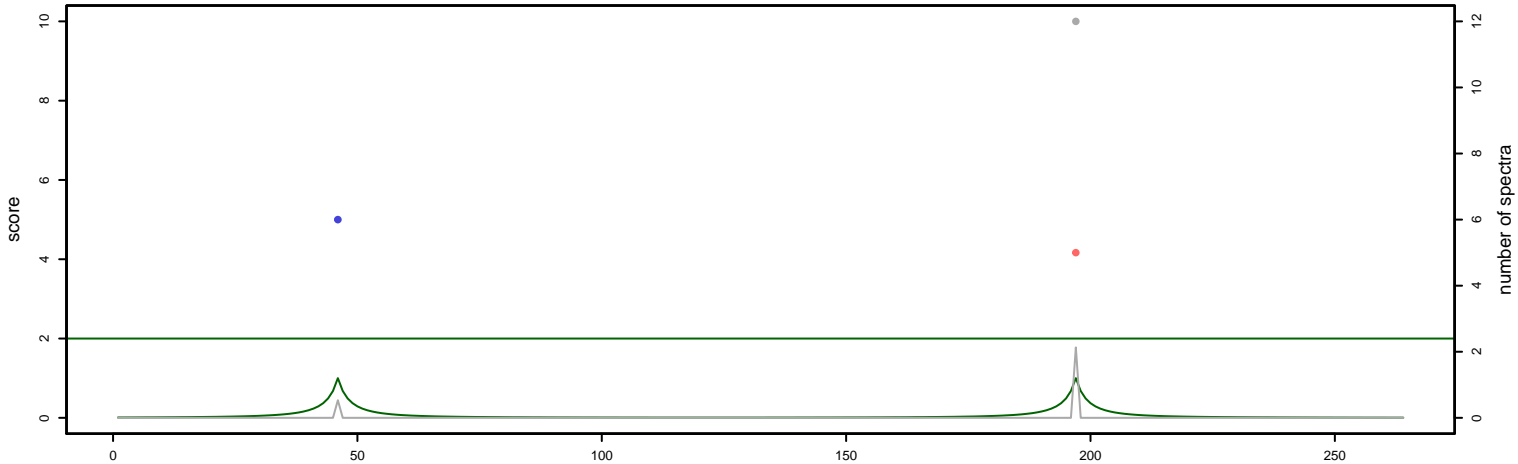

replica

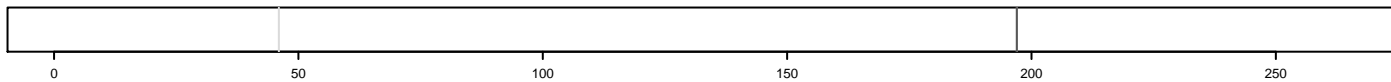

stability

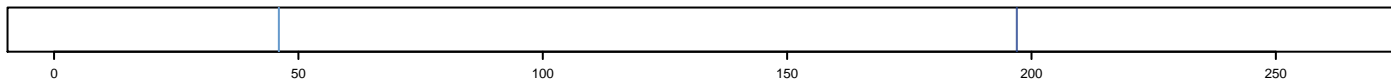



### Proteasome subunit beta type-6 (P28072)

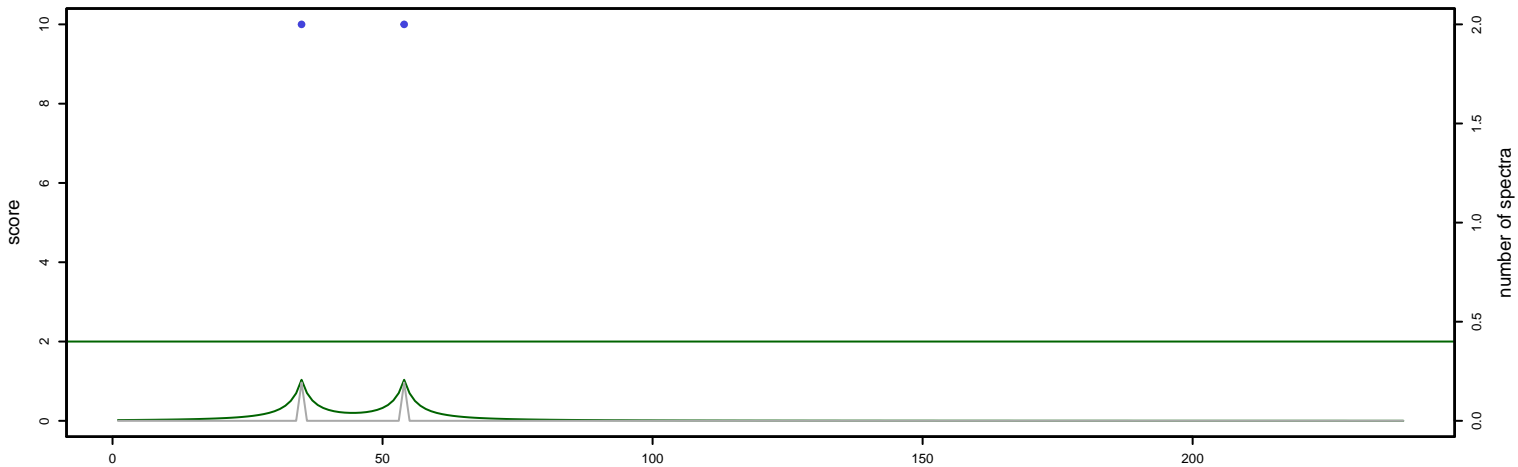

replica

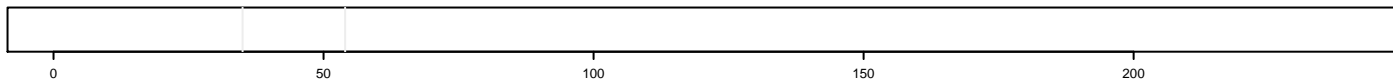

stability

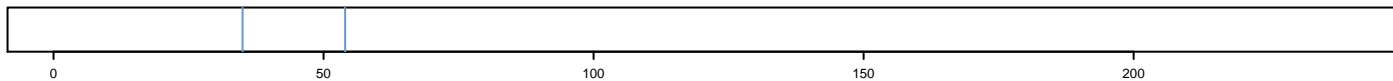

# Proteasome subunit beta type-5 (P28074)

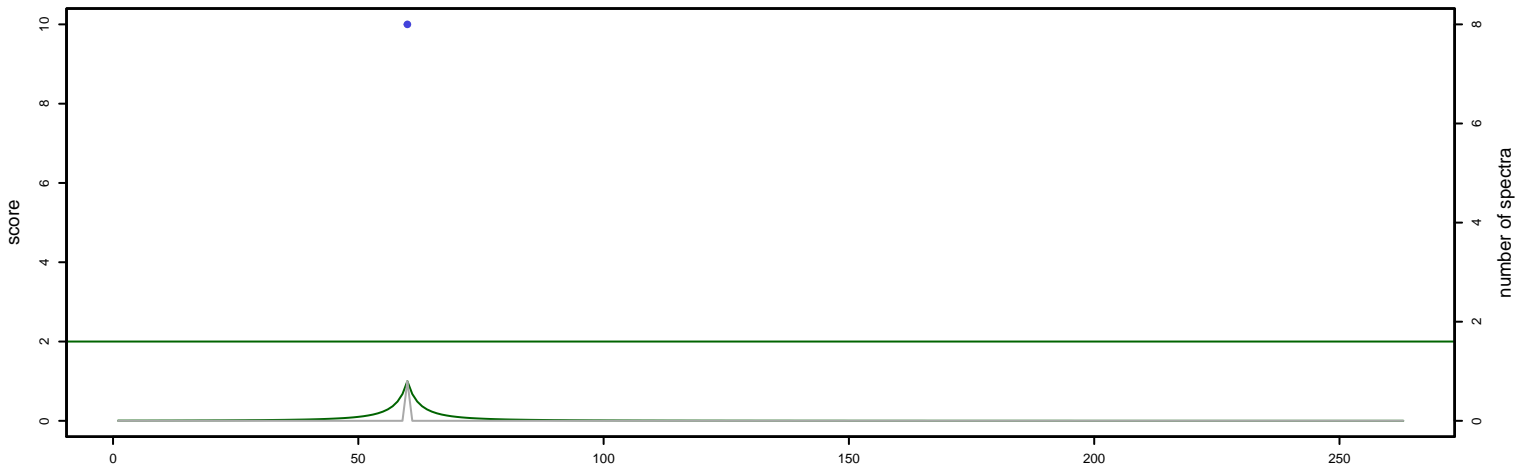

replica

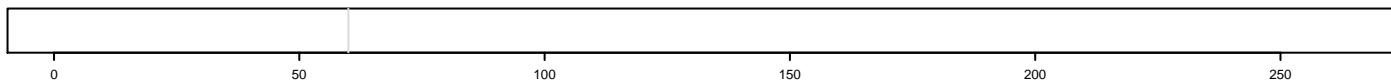

stability

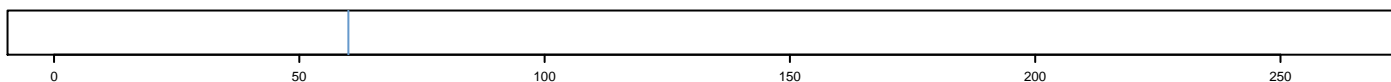

# Mitogen-activated protein kinase 1 (P28482)

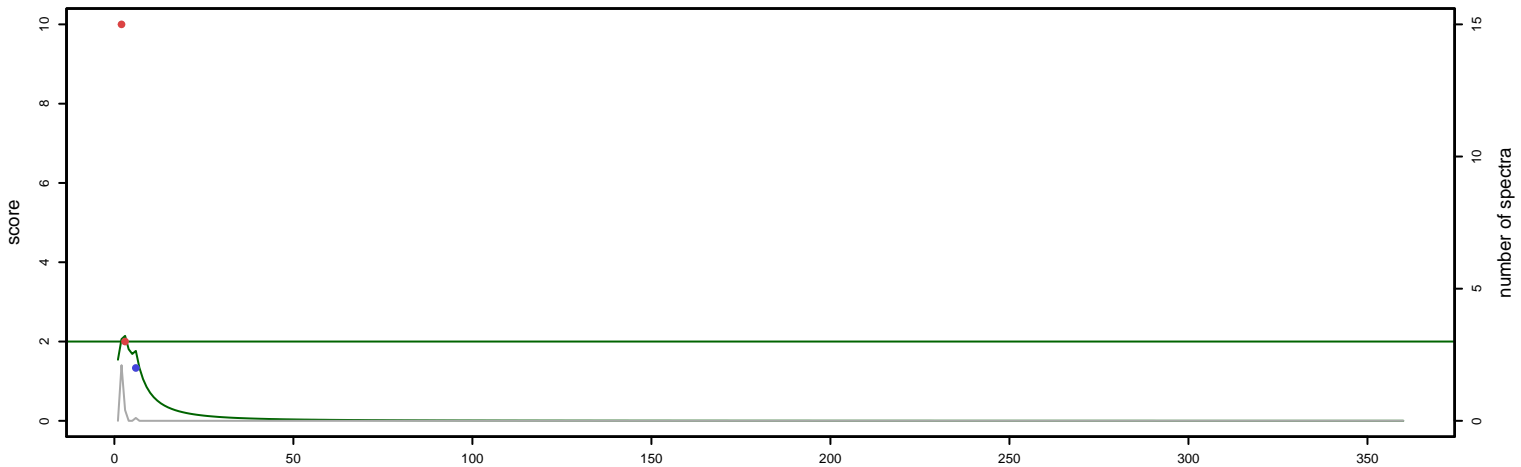

replica

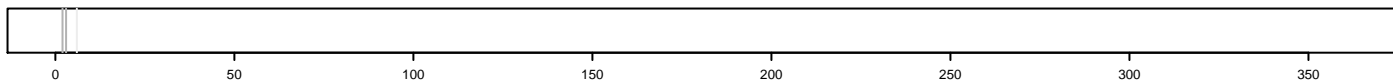

stability

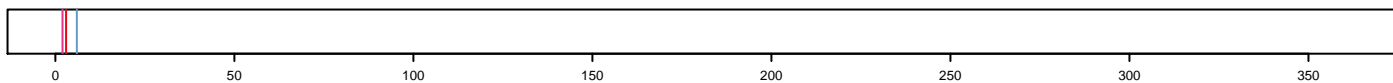

### Tripeptidyl-peptidase 2 (P29144)

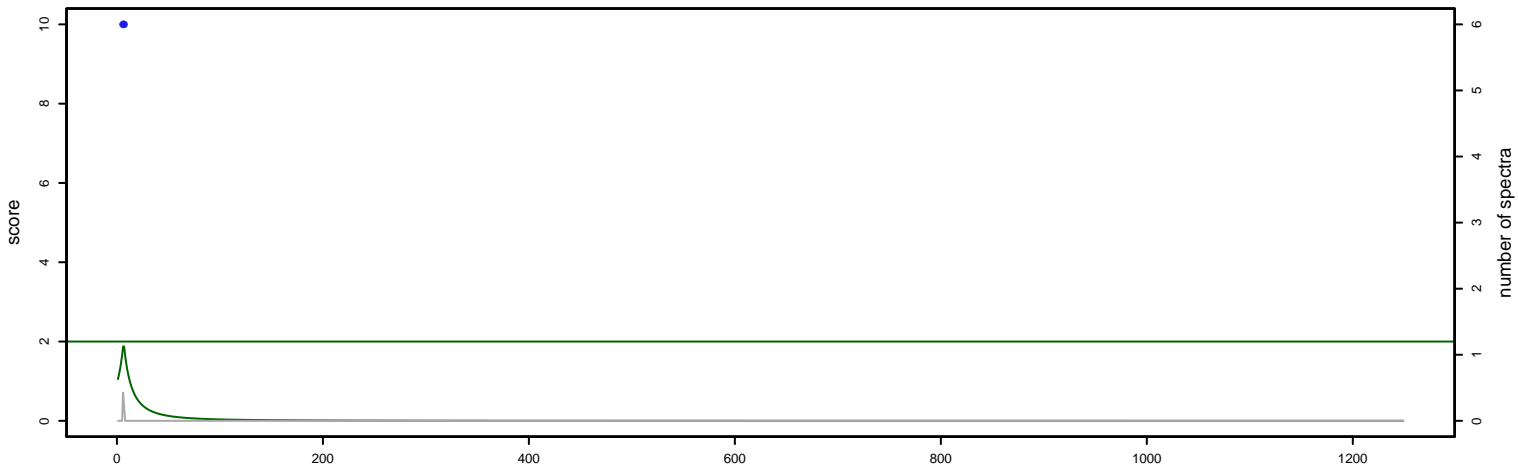

replica

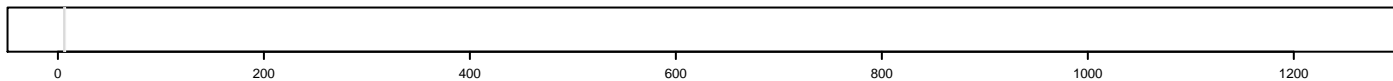

stability

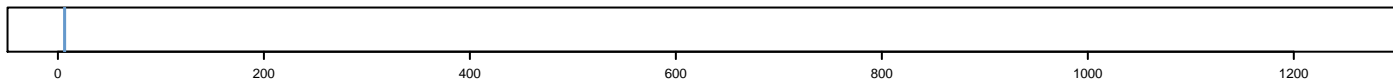

### Peroxiredoxin-6 (P30041)

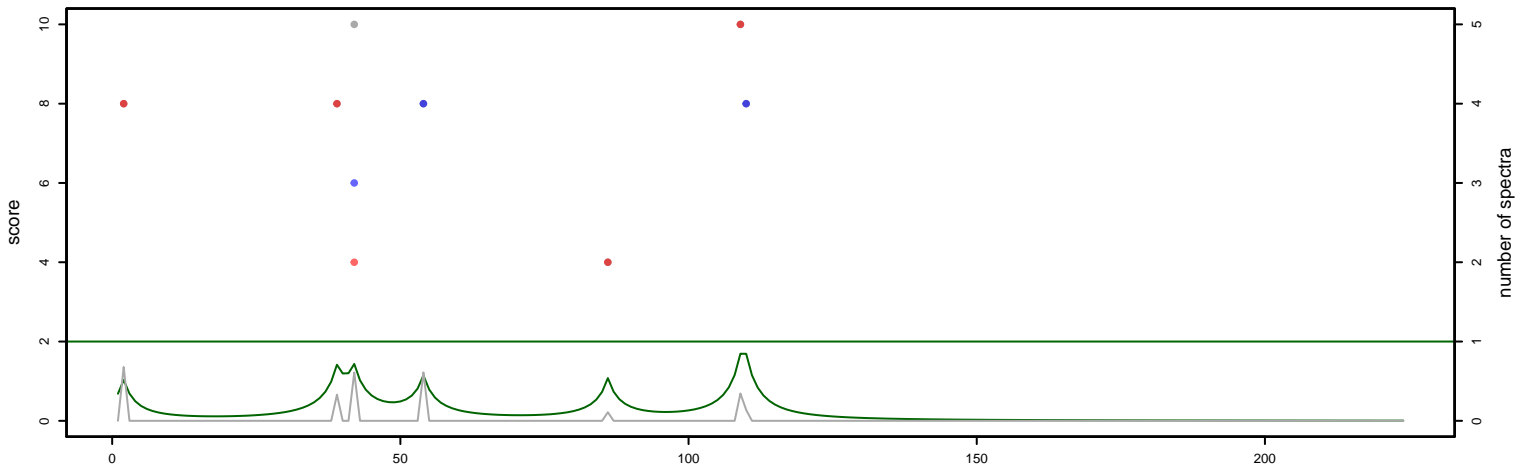

### replica

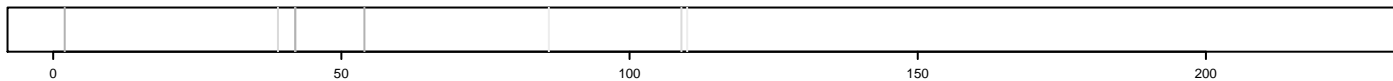

### stability

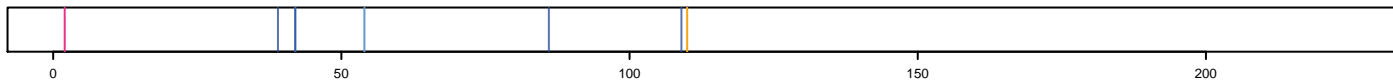

# Flavin reductase (NADPH) (P30043)

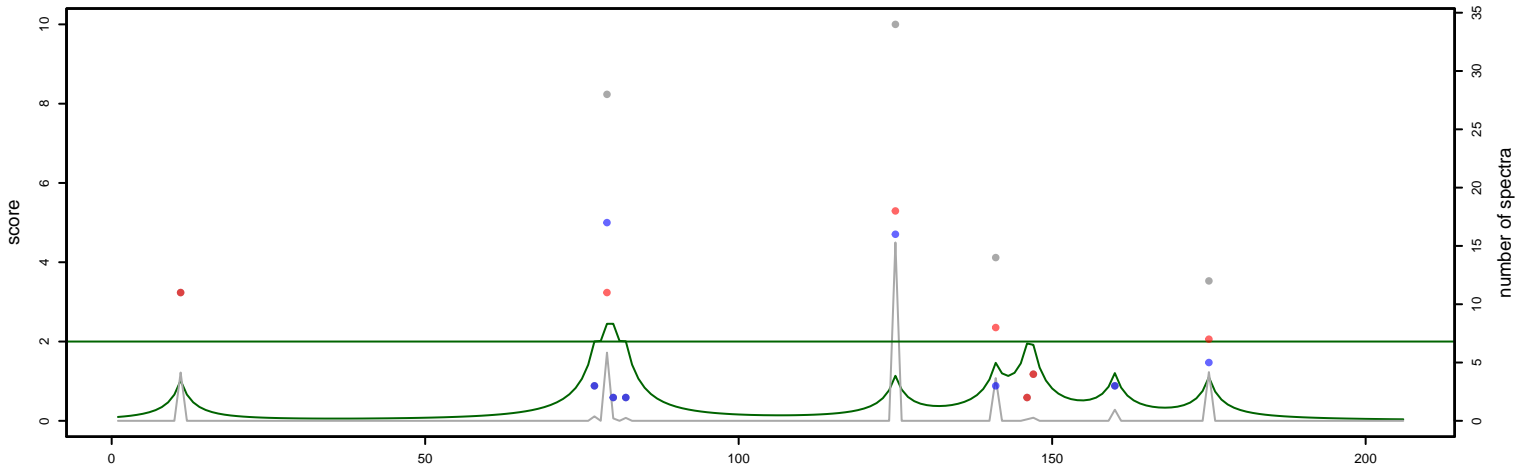

## replica

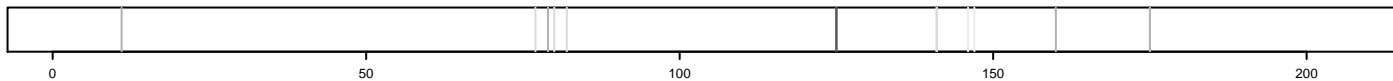

## stability

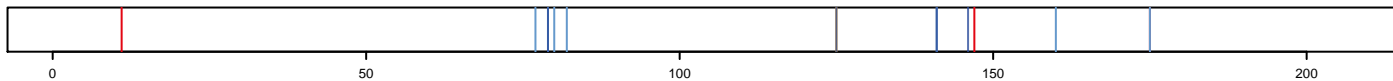

# Protein disulfide-isomerase A3 (P30101)

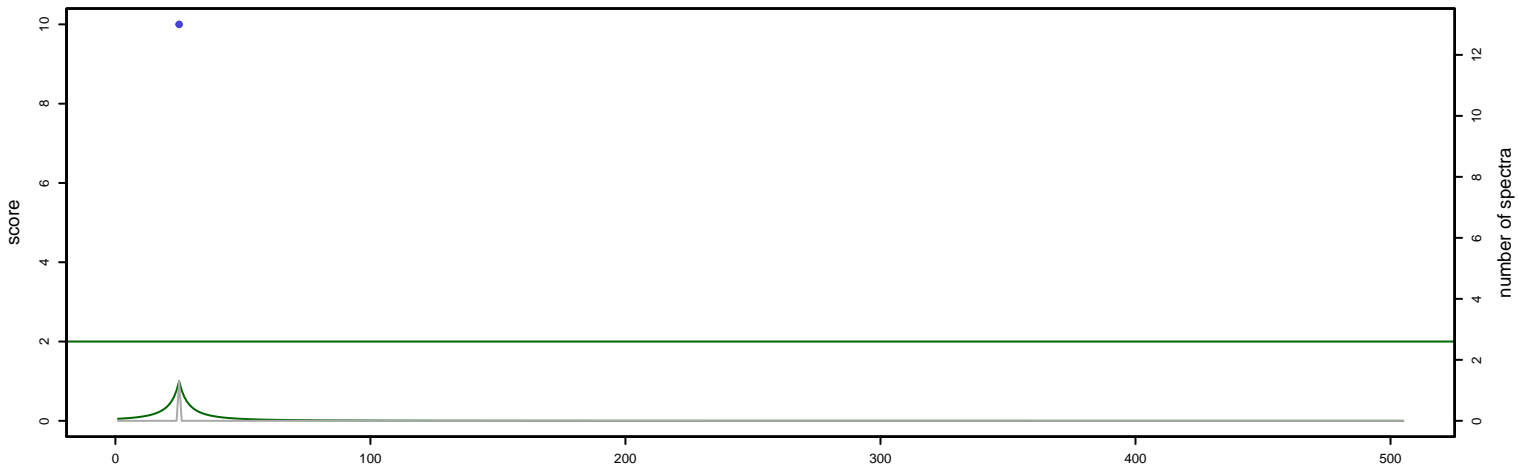

replica

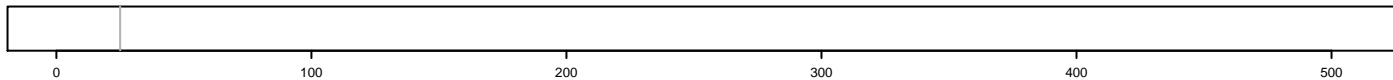

stability

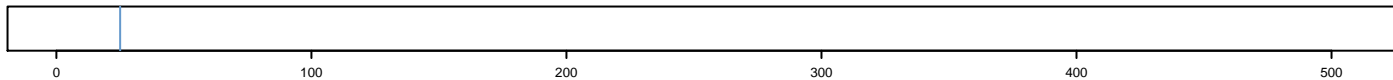

# Serine/threonine-protein phosphatase 2A 65 kDa regulatory subunit A alpha isoform (P30153)

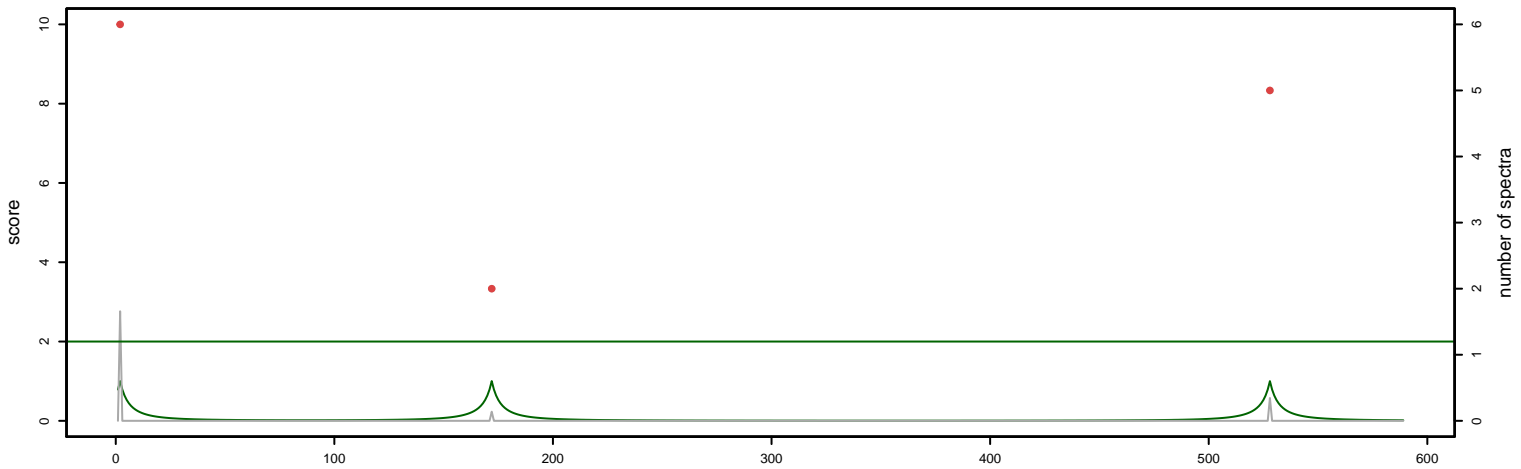

replica

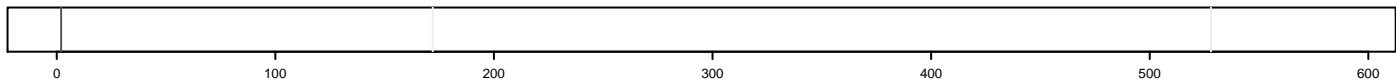

stability

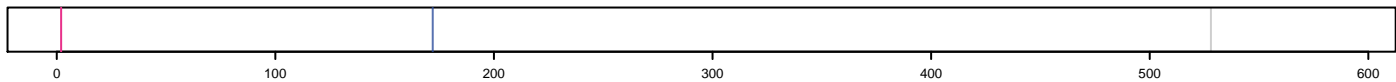



# Adenylosuccinate lyase (P30566)

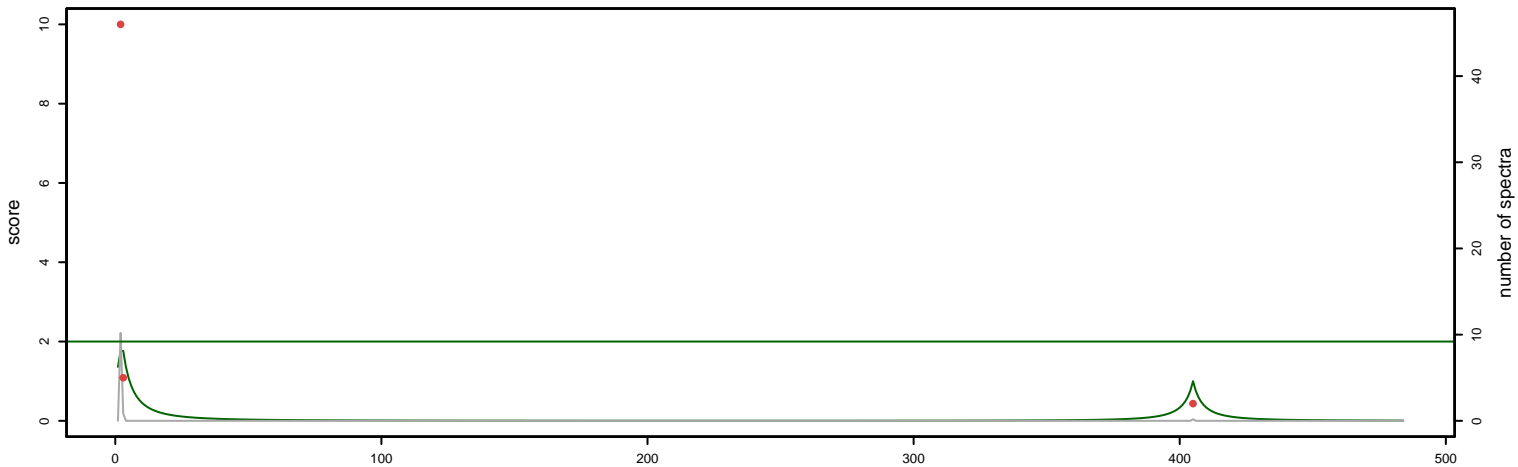

replica

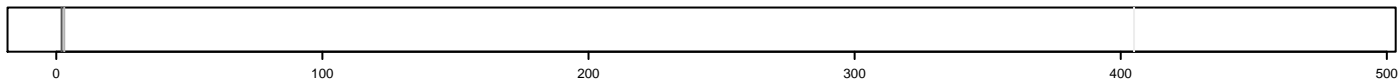

stability

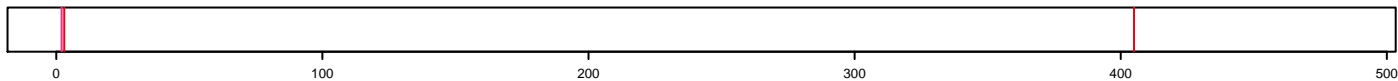

# Pyruvate kinase isozymes R/L (P30613)

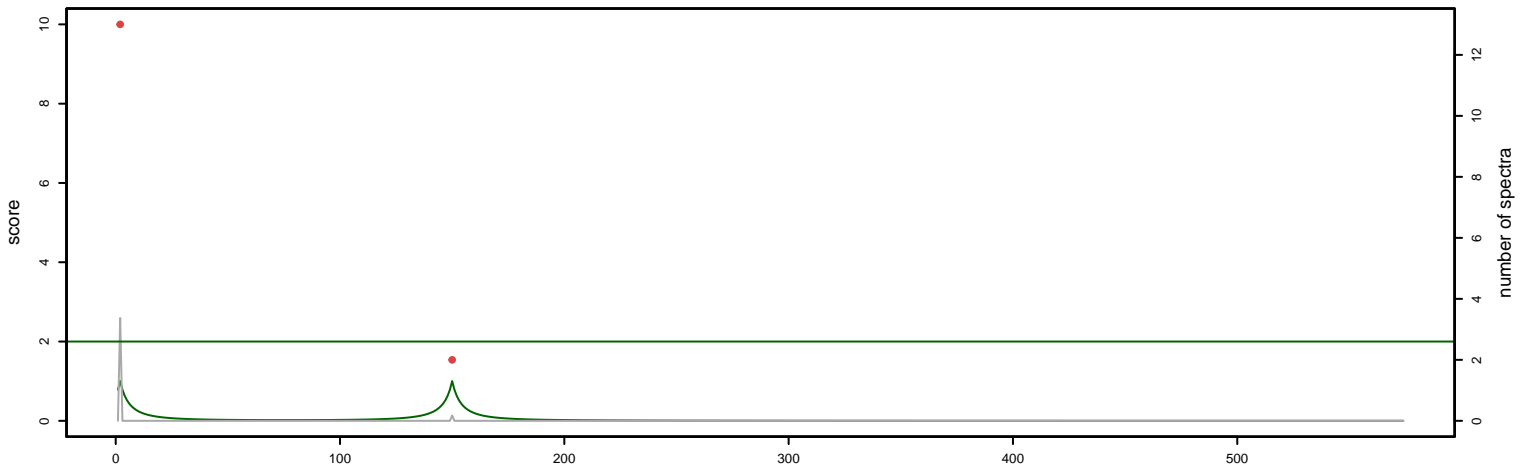

replica

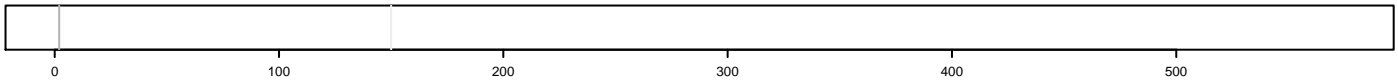

stability

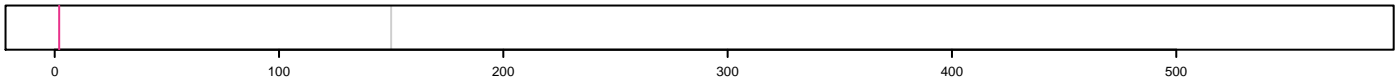

# Leukocyte elastase inhibitor (P30740)

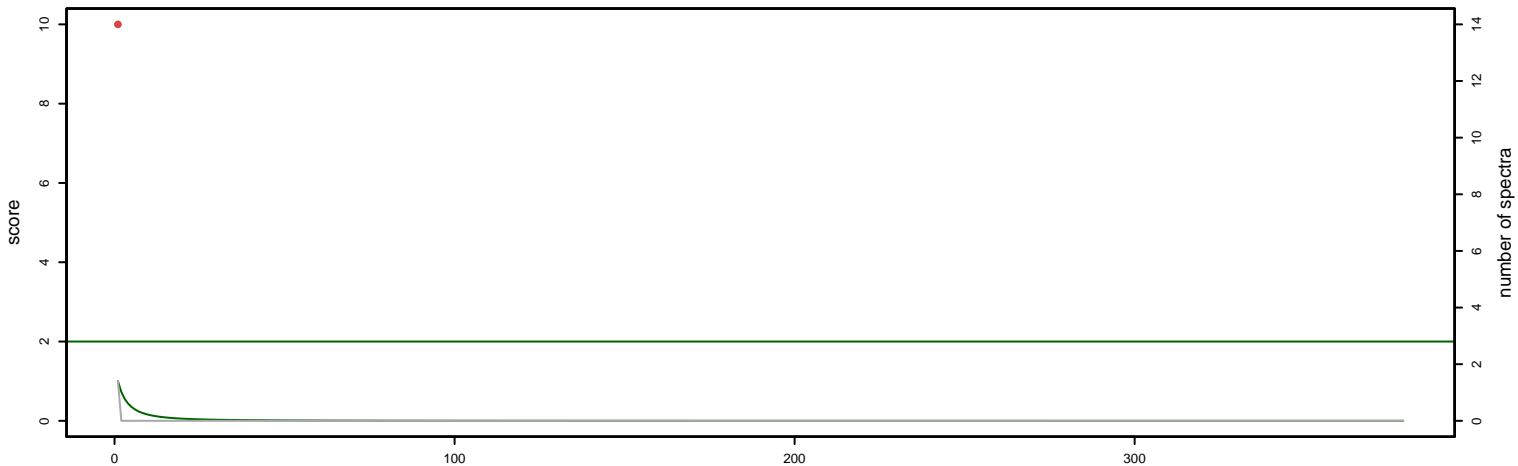

replica

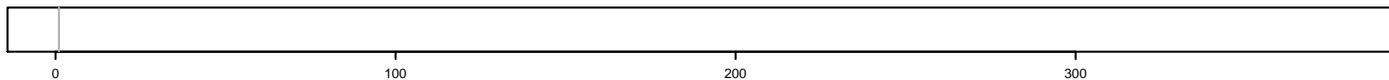

stability

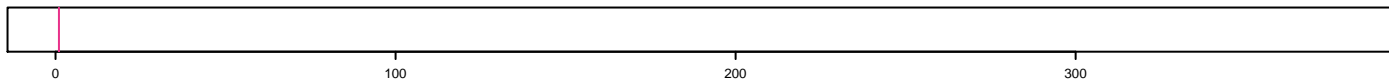

### Bifunctional purine biosynthesis protein PURH (P31939)

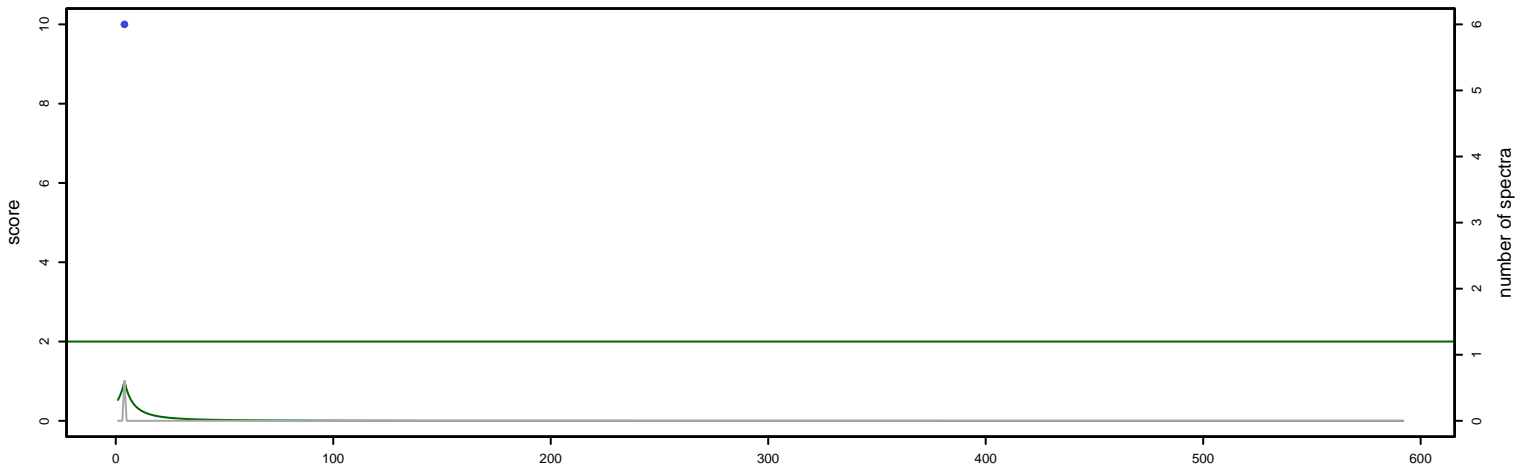

replica

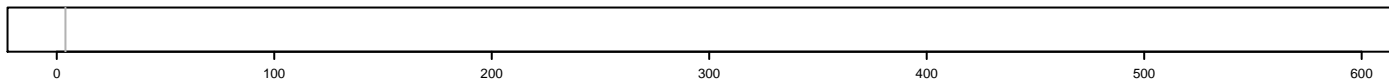

stability

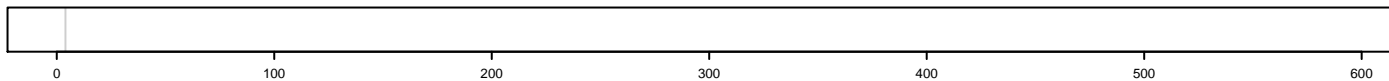

# DNA dC→dU-editing enzyme APOBEC-3A (P31941)

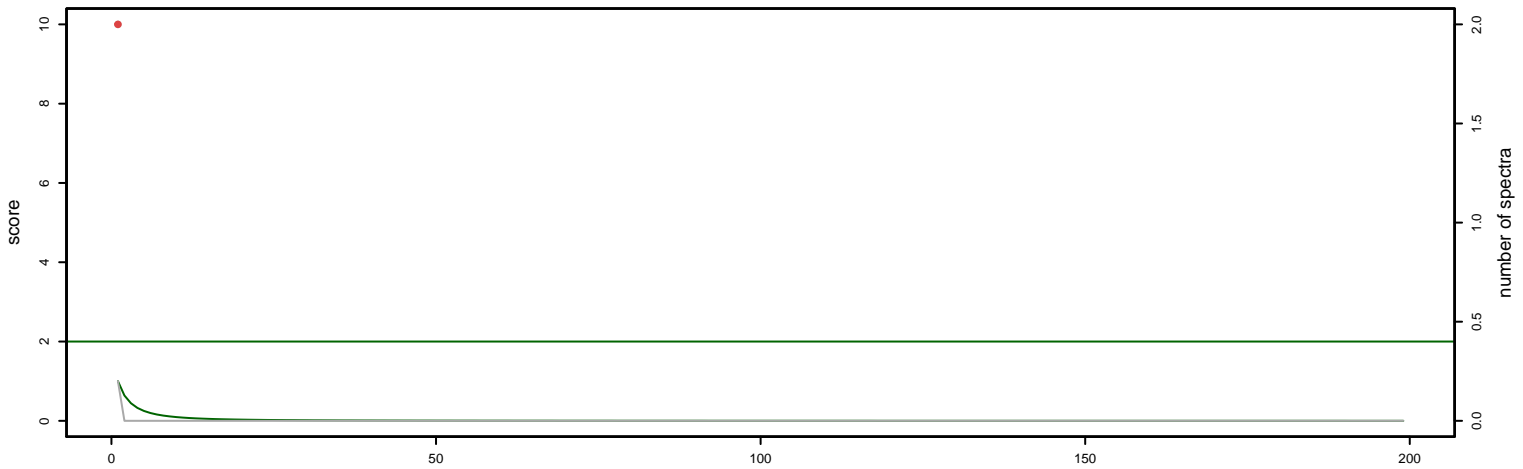

replica

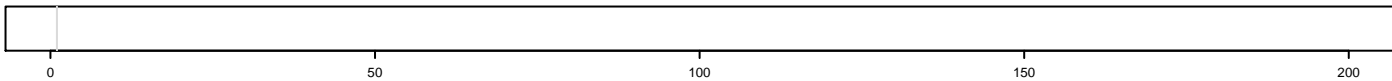

stability

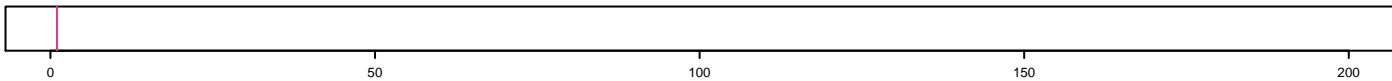

### Heterogeneous nuclear ribonucleoprotein H3 (P31942)

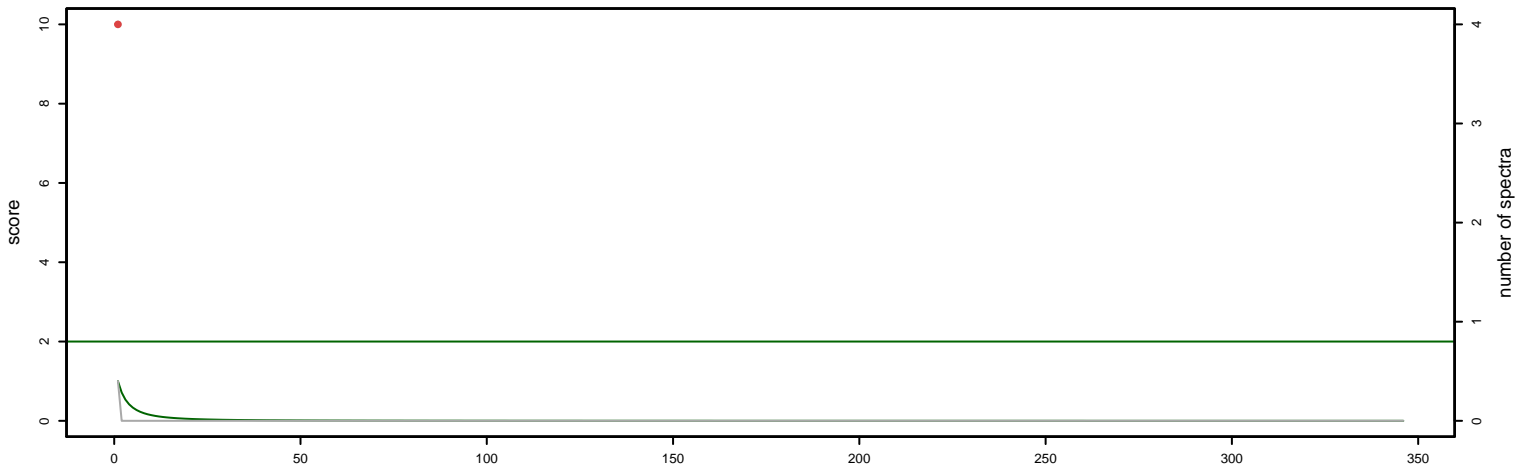

replica

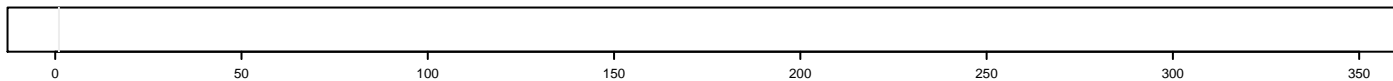

stability

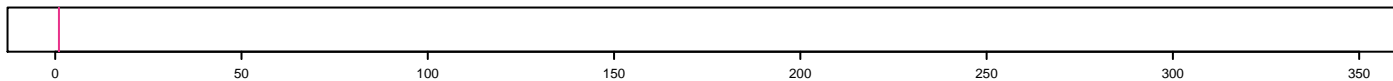

# Heterogeneous nuclear ribonucleoprotein H (P31943)

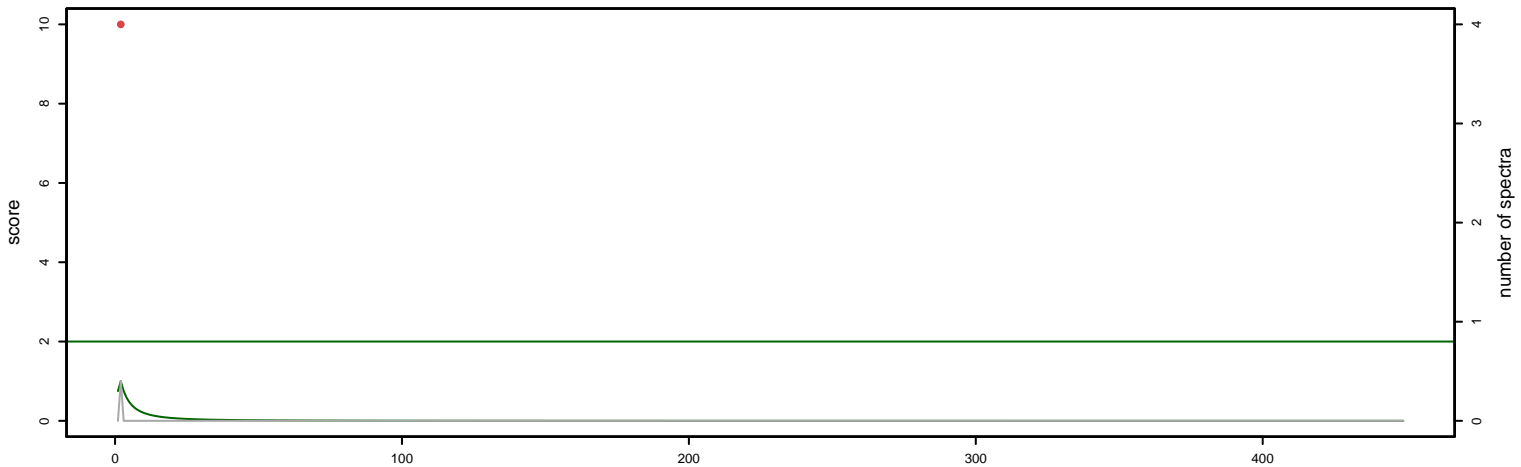

replica

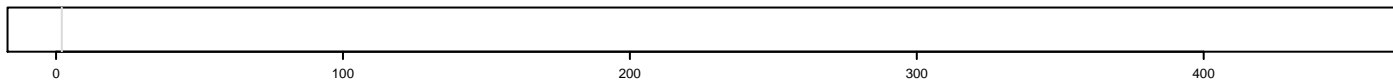

stability

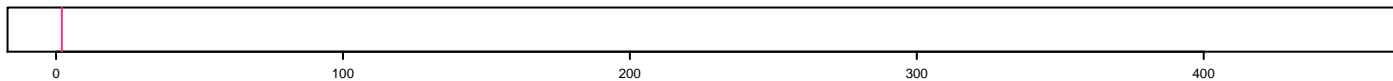

# 14-3-3 protein beta/alpha (P31946)

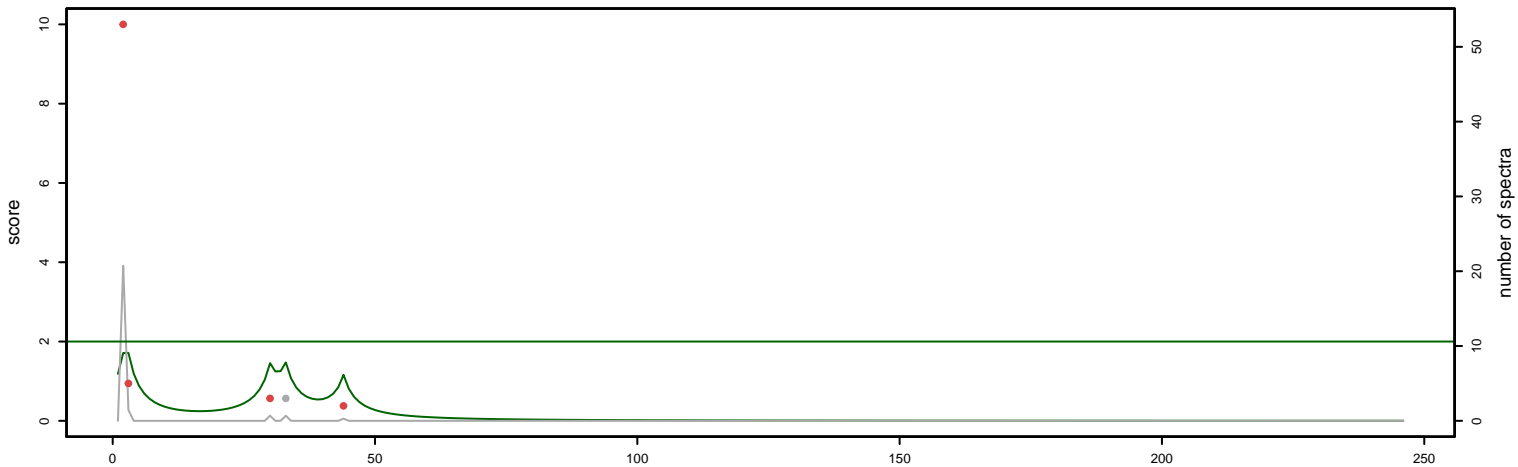

replica

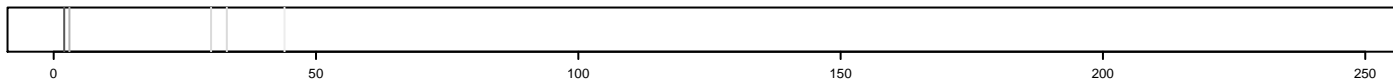

stability

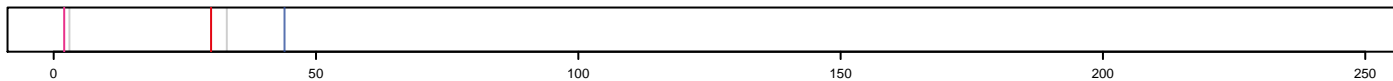



# 14-3-3 protein beta/alpha (P31946-2)

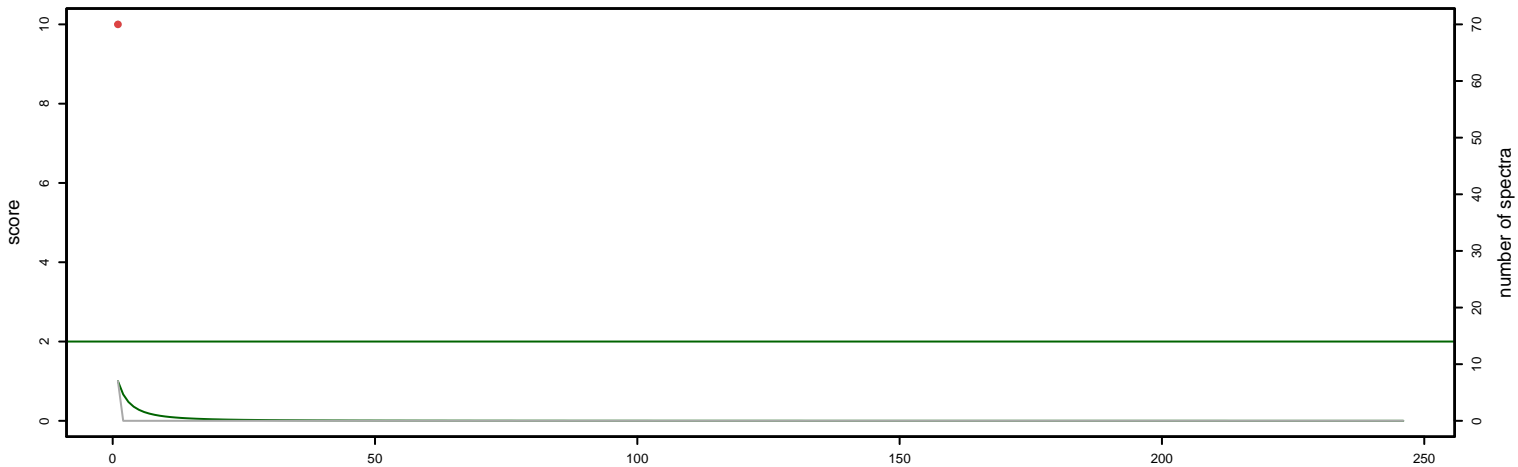

replica

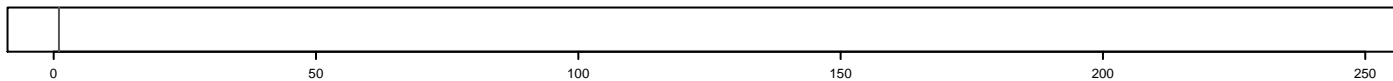

stability

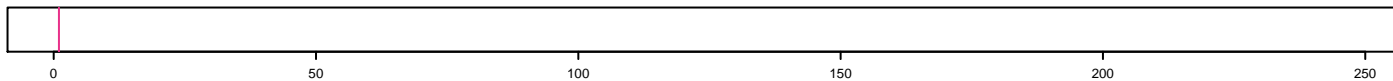

# Stress-induced-phosphoprotein 1 (P31948)

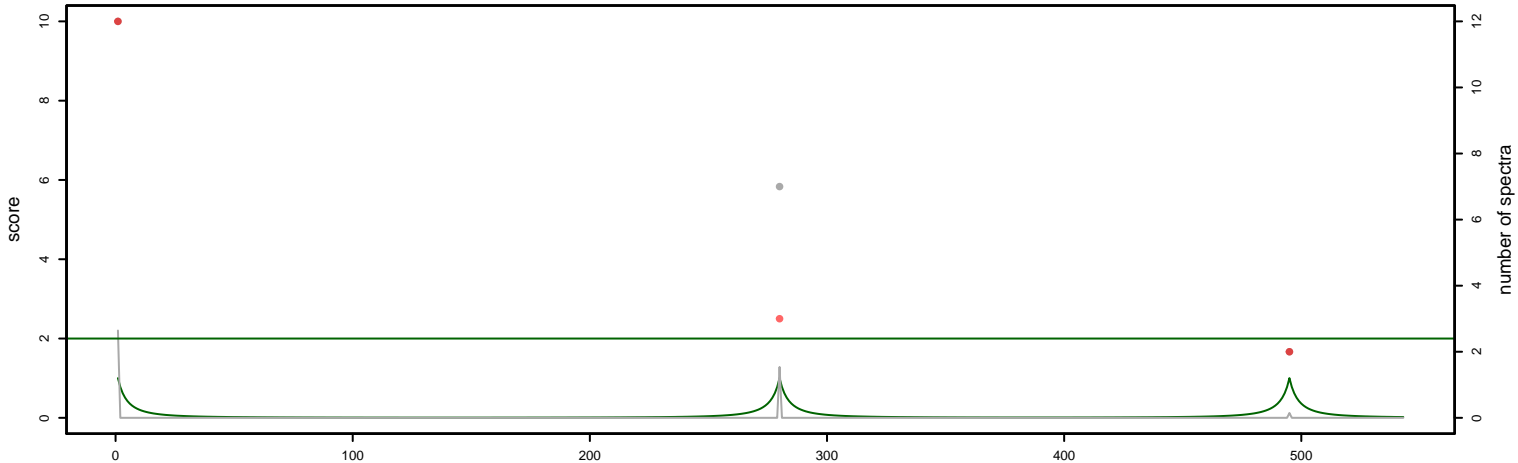

replica

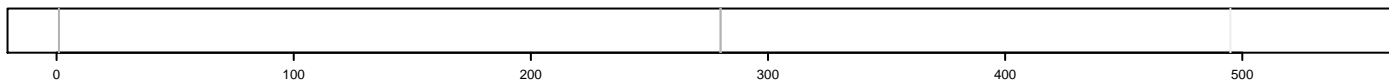

stability

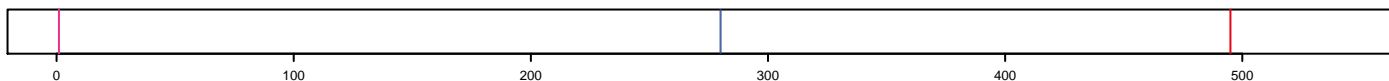

### Peroxiredoxin-2 (P32119)

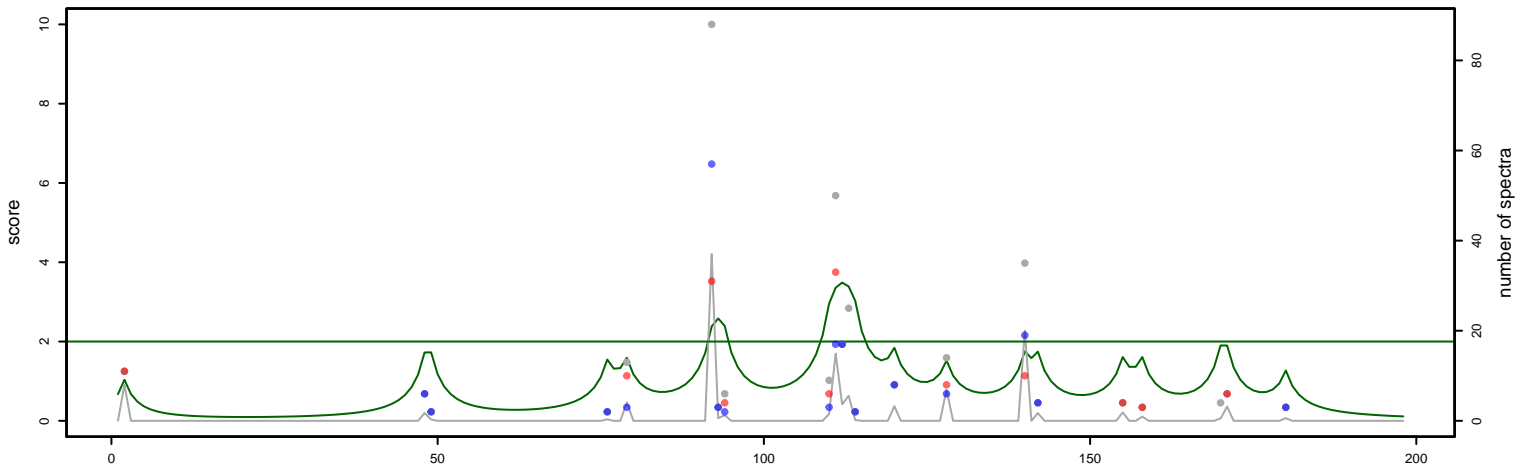

### replica

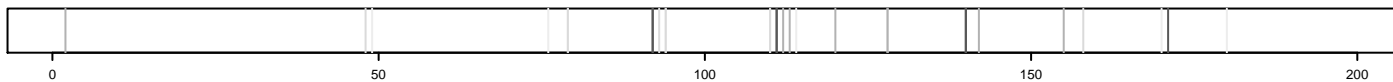

### stability

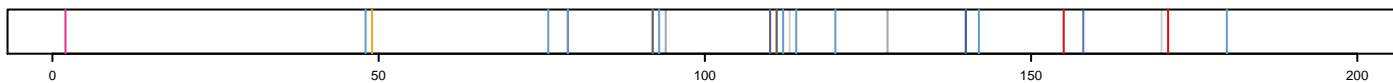

# Heat shock 70 kDa protein 4 (P34932)

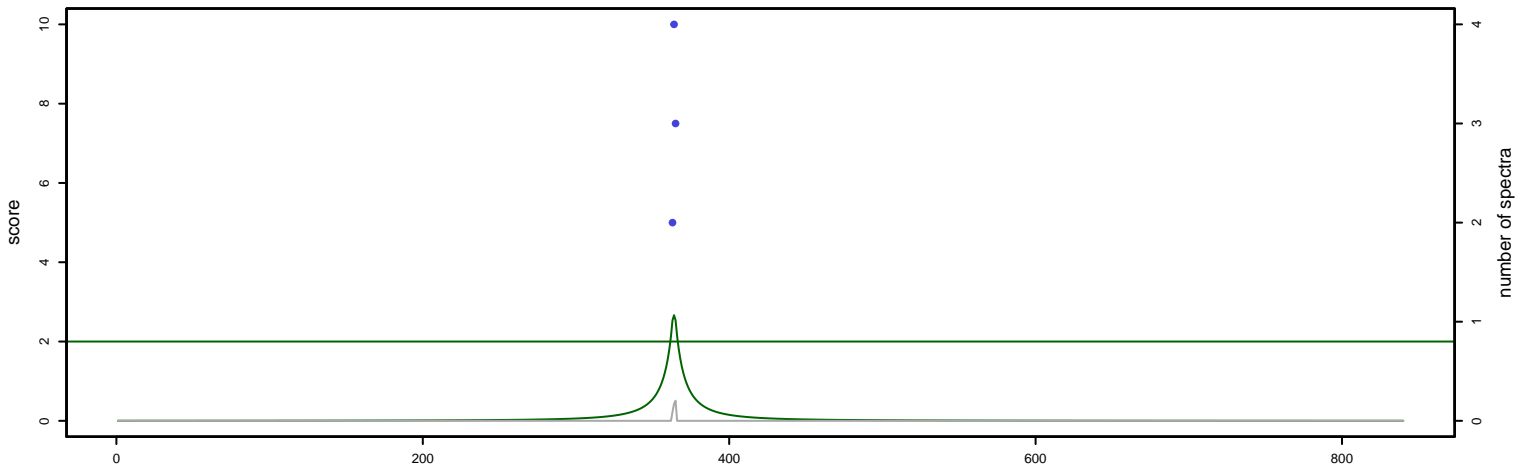

replica

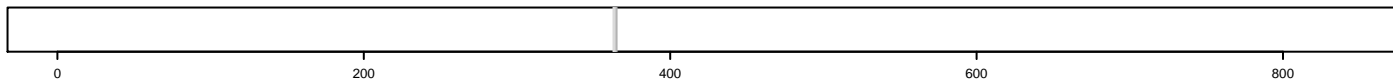

stability

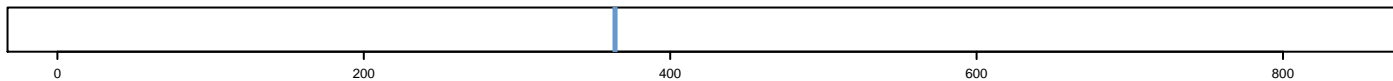

### Myosin-9 (P35579)

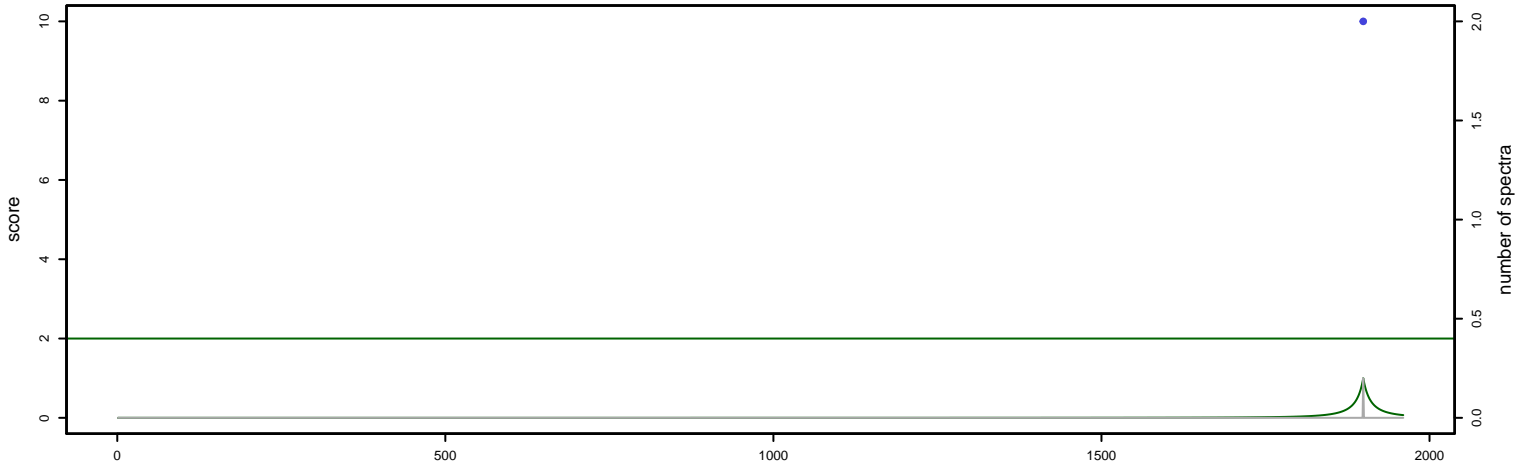

### replica

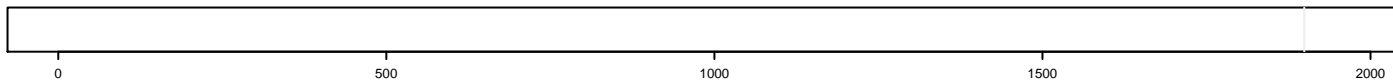

### stability

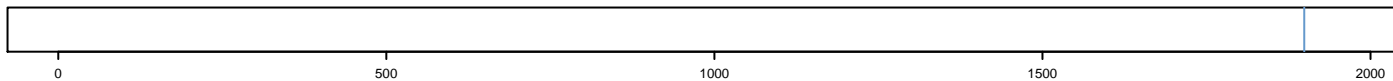

# Alpha-adducin (P35611)

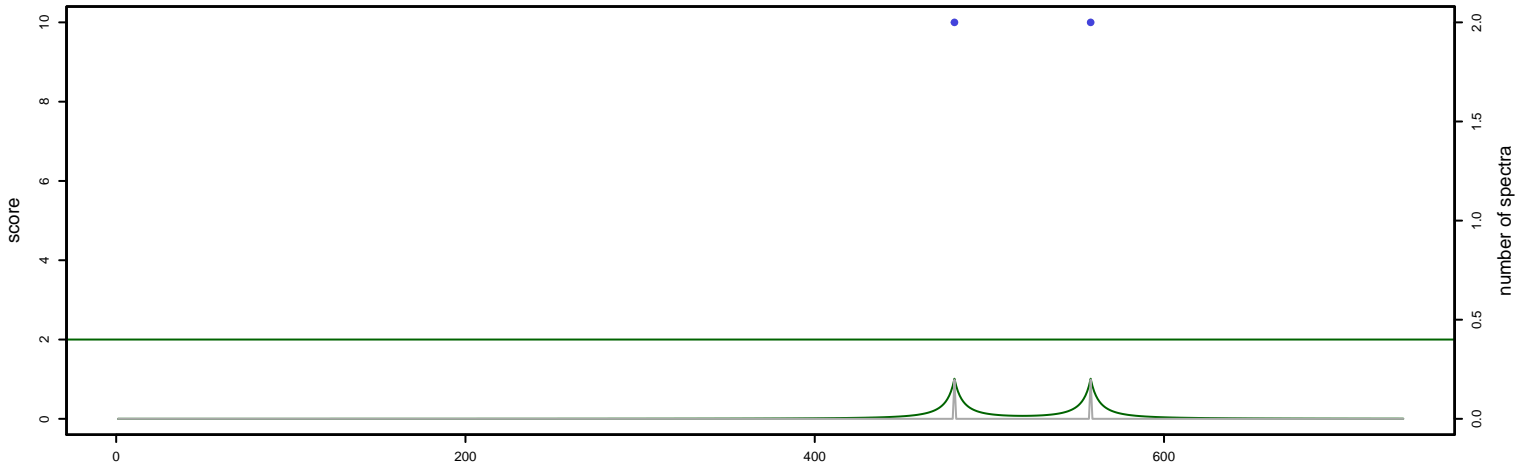

replica

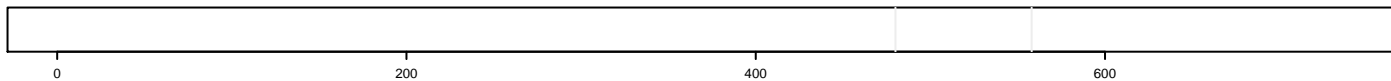

stability

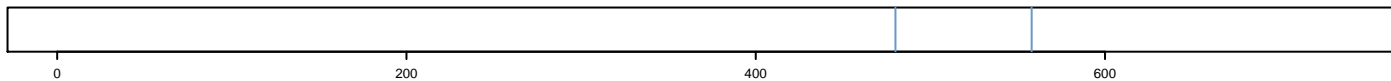

# Beta-adducin (P35612)

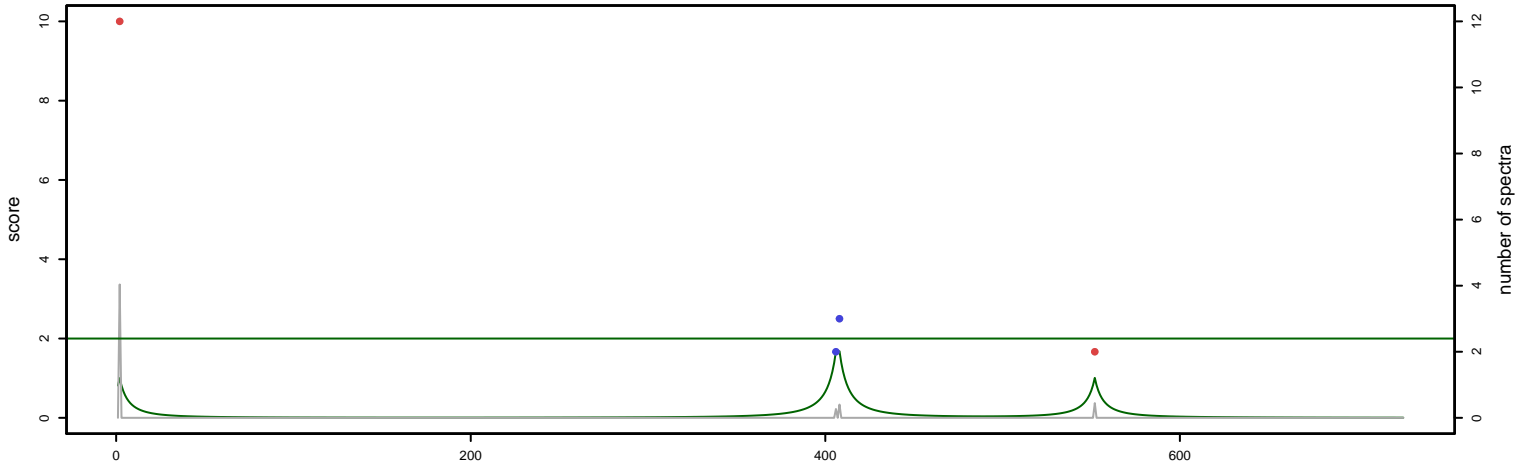

## replica

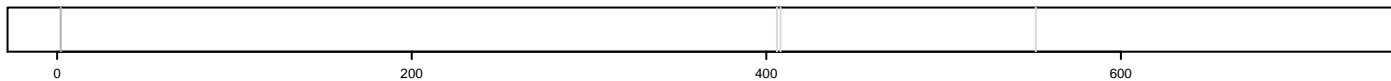

## stability

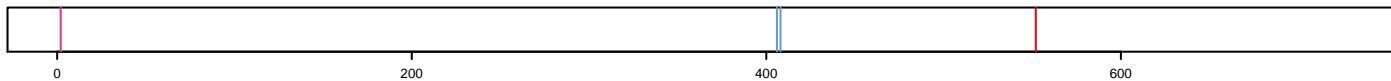

# Basigin (P35613)

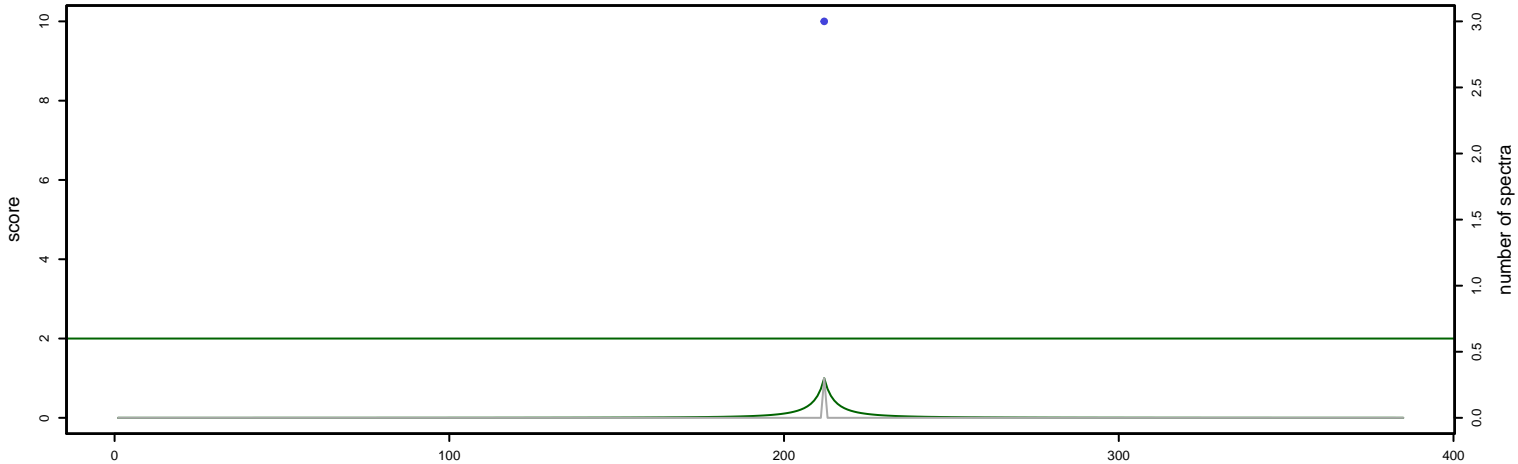

## replica

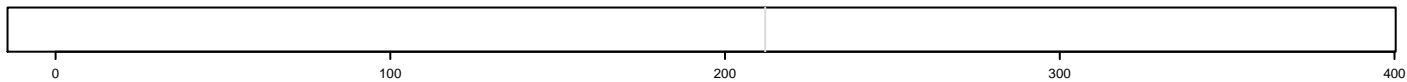

## stability

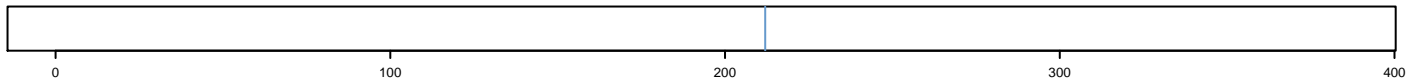



### V-type proton ATPase subunit E 1 (P36543)

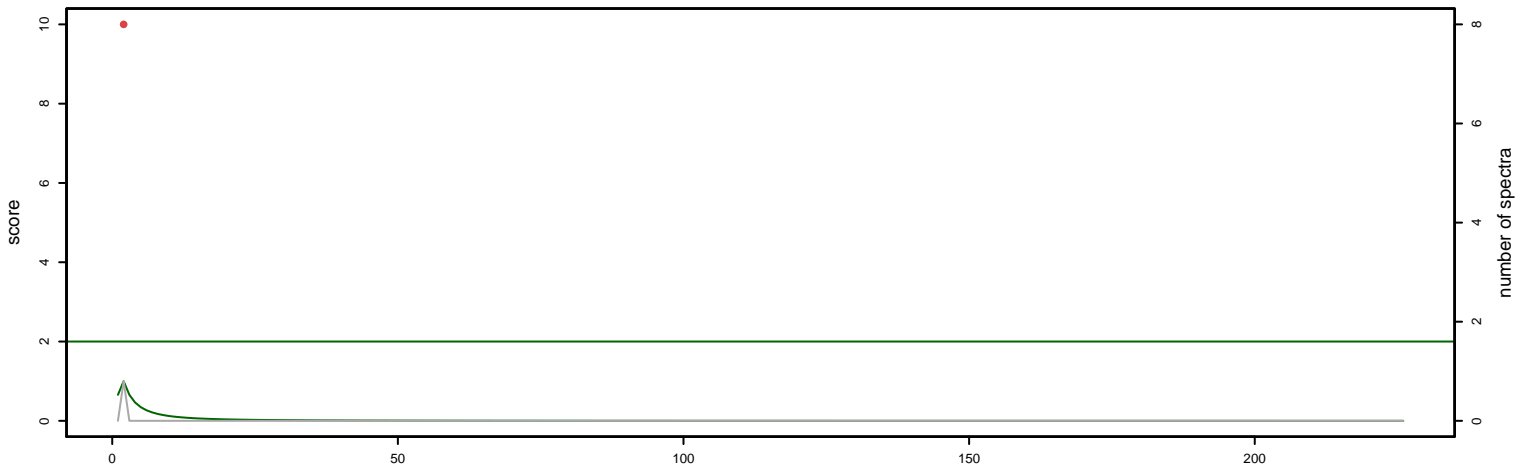

replica

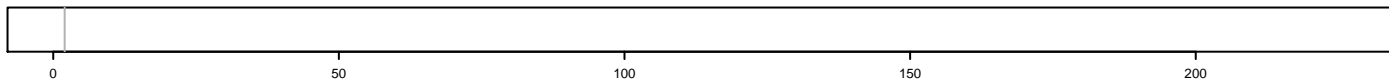

stability

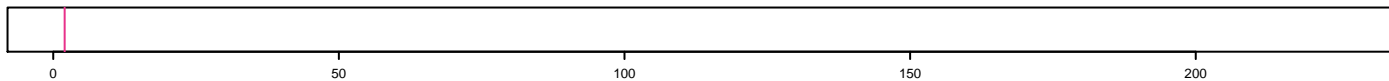

# Serine/threonine-protein phosphatase PP1-gamma catalytic subunit (P36873)

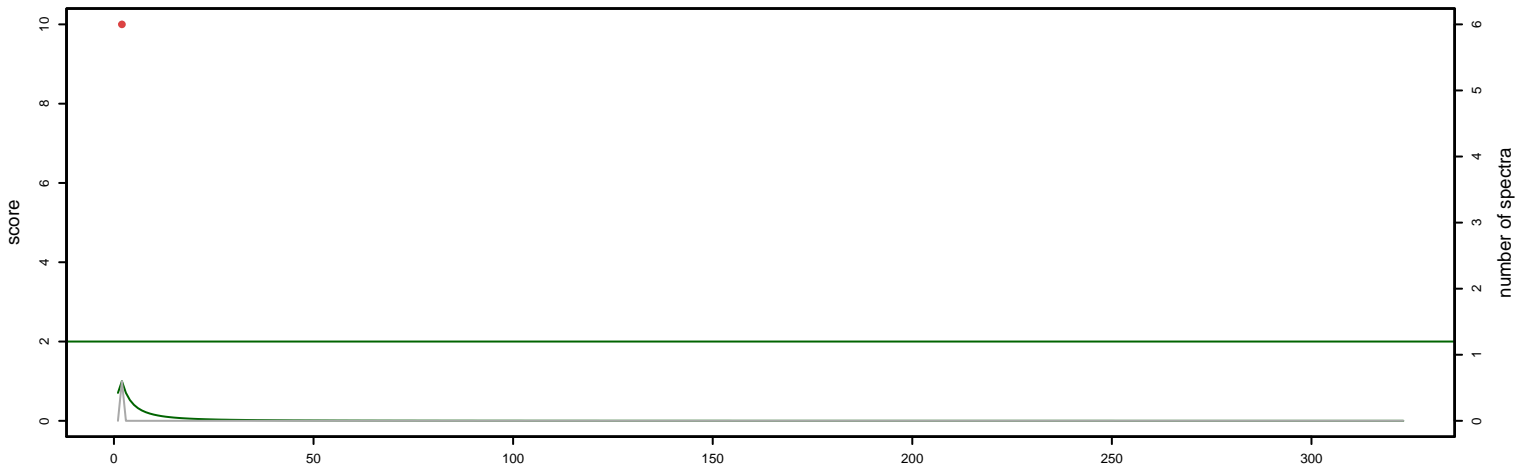

replica

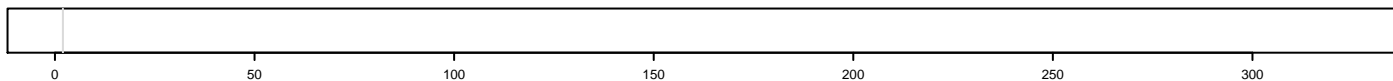

stability

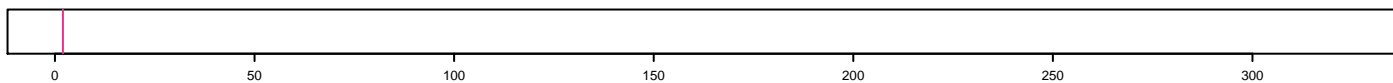

# GMP reductase 1 (P36959)

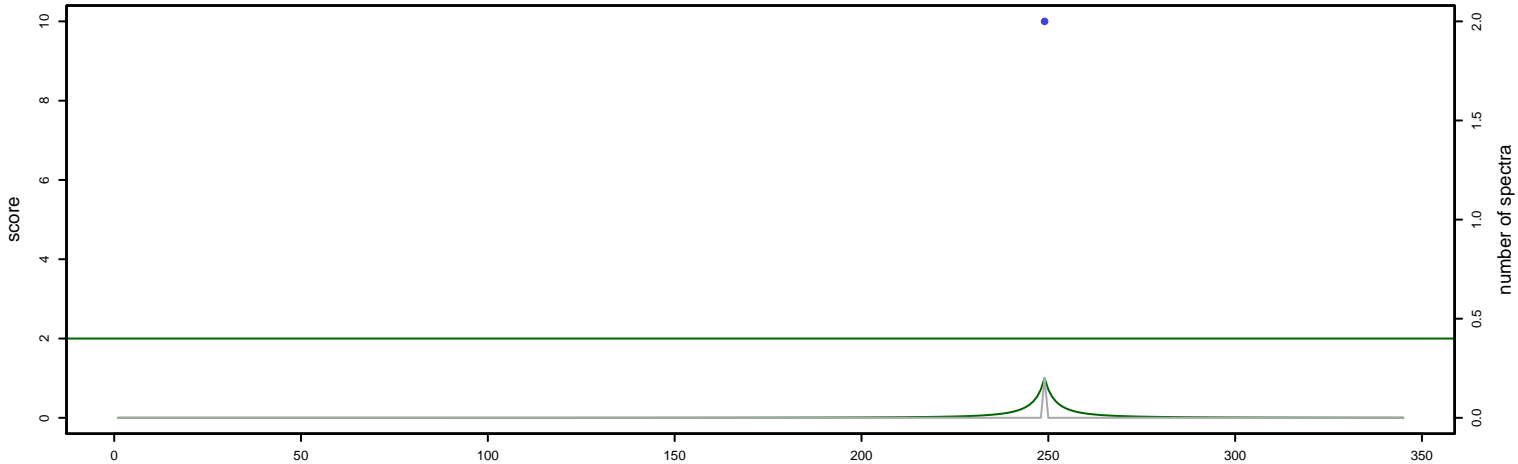

replica

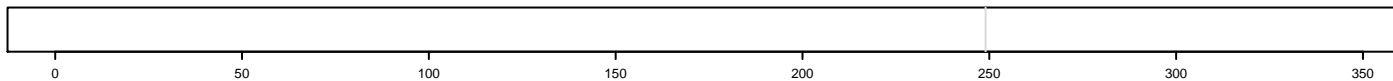

stability

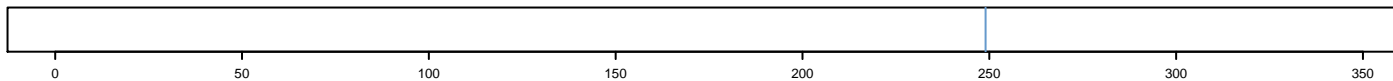

# Alpha-synuclein (P37840)

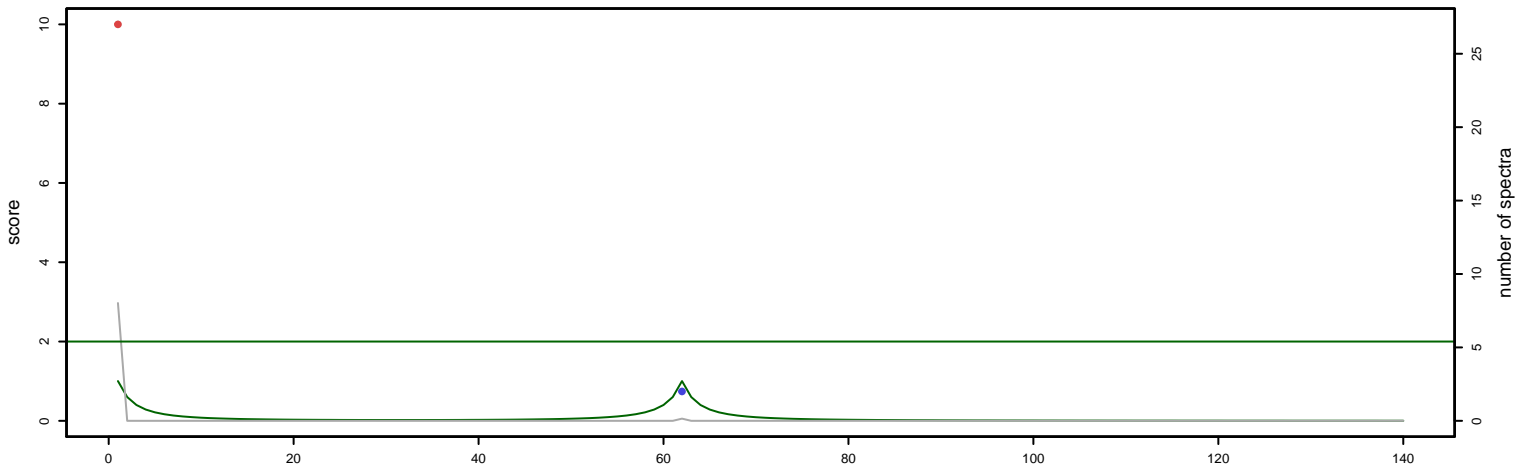

replica

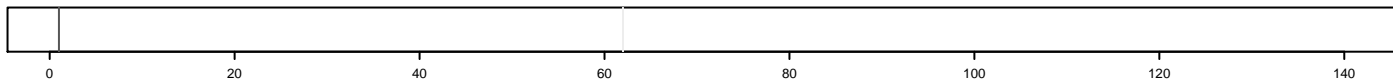

stability

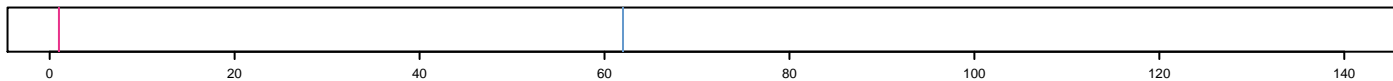

### V-type proton ATPase catalytic subunit A (P38606)

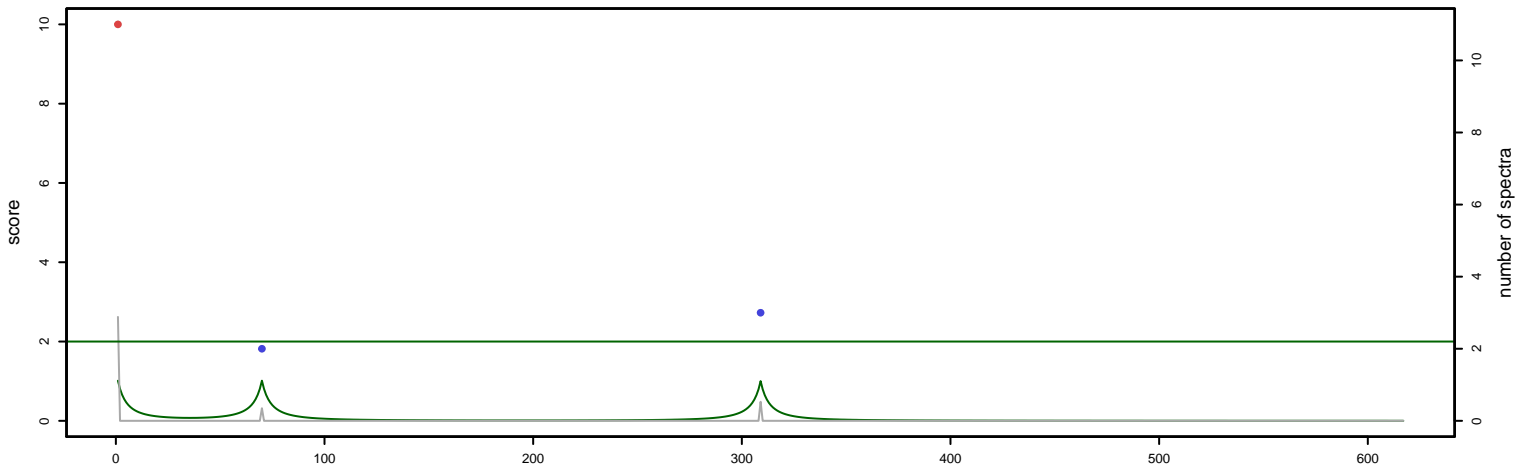

replica

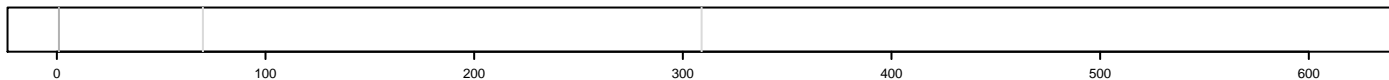

stability

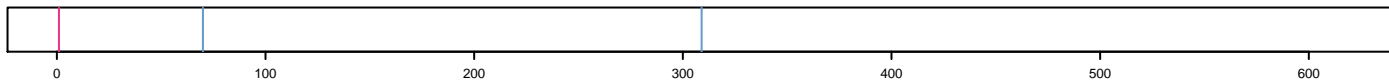

# Eukaryotic initiation factor 4A-III (P38919)

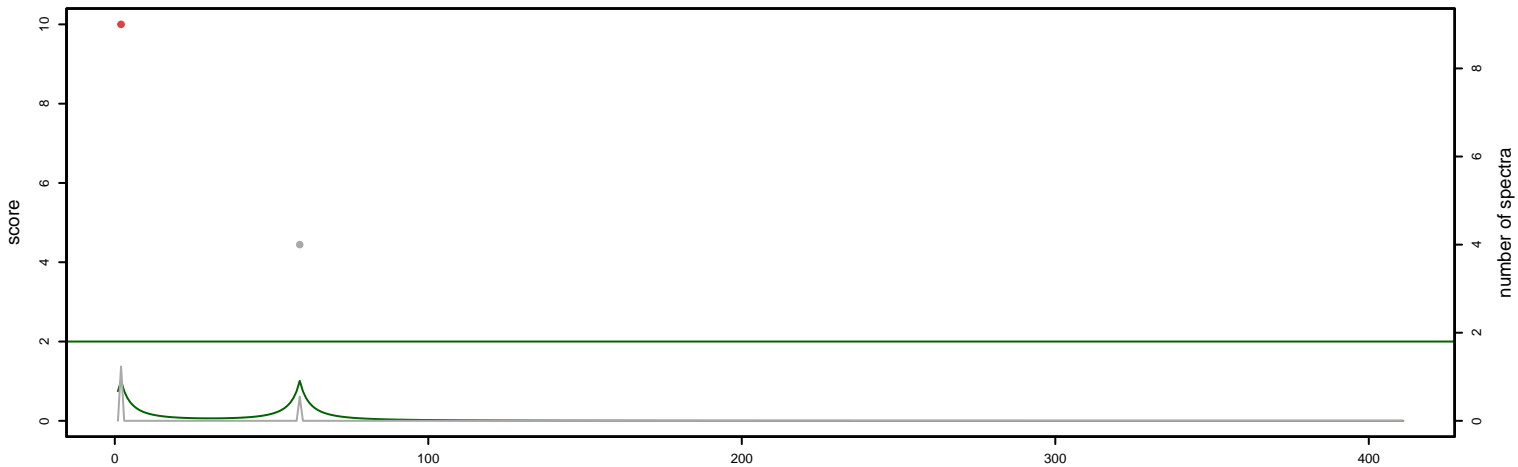

replica

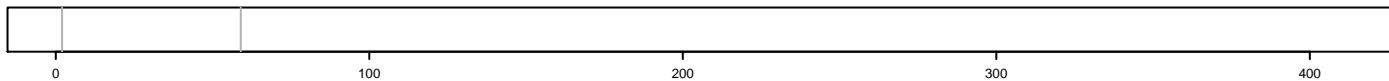

stability

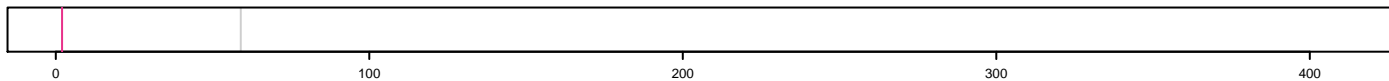

# T-complex protein 1 subunit zeta (P40227)

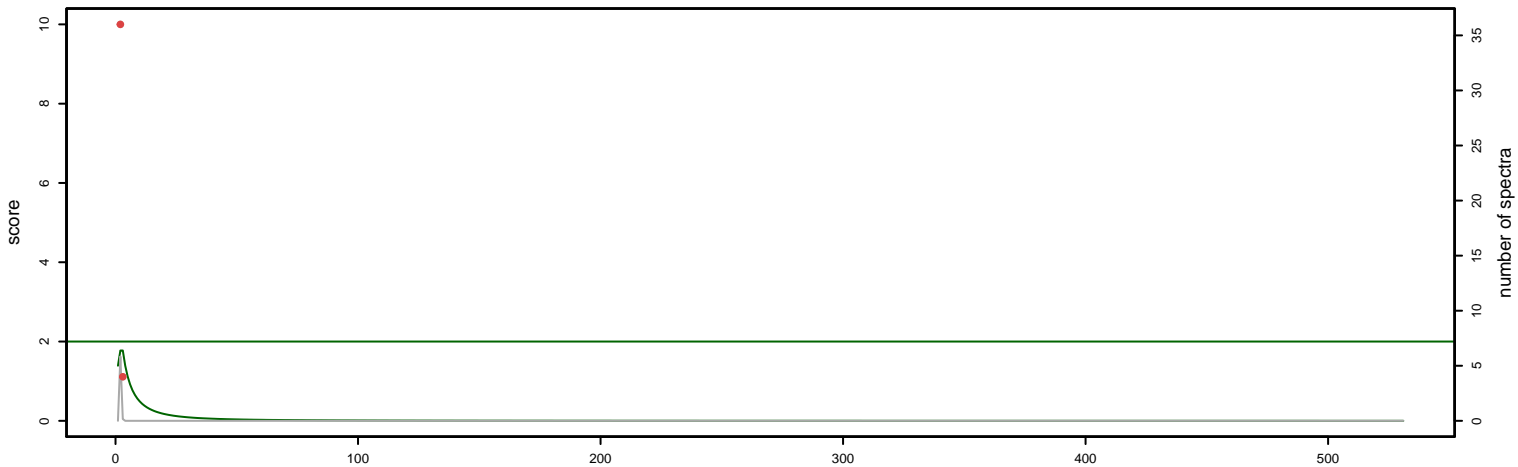

replica

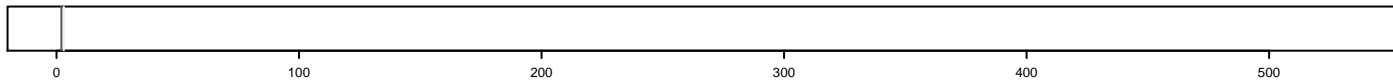

stability

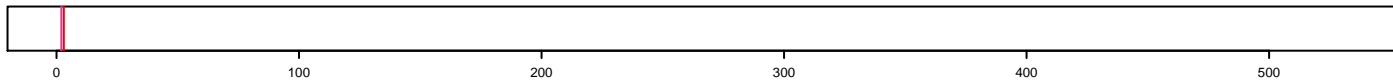

### Eukaryotic translation initiation factor 2 subunit 3 (P41091)

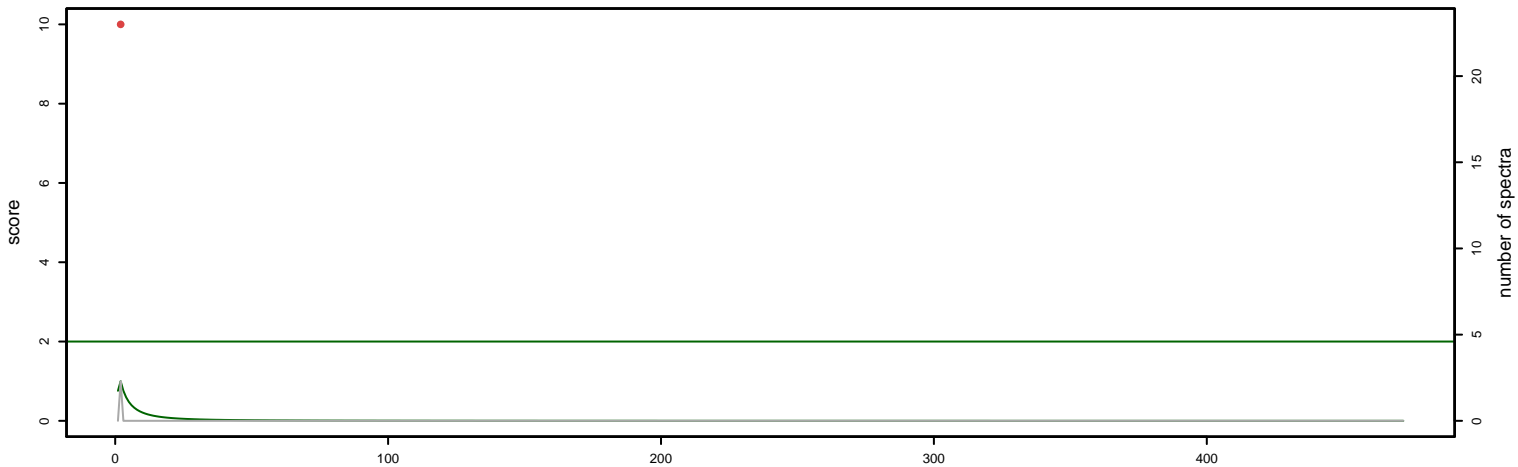

replica

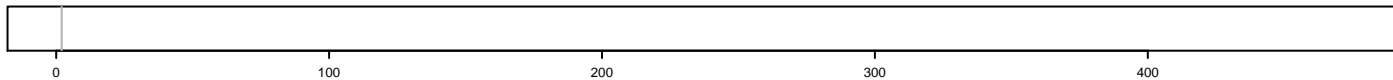

stability

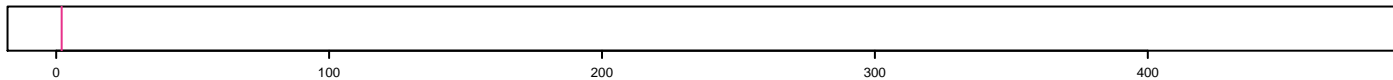



### Caspase-3 (P42574)

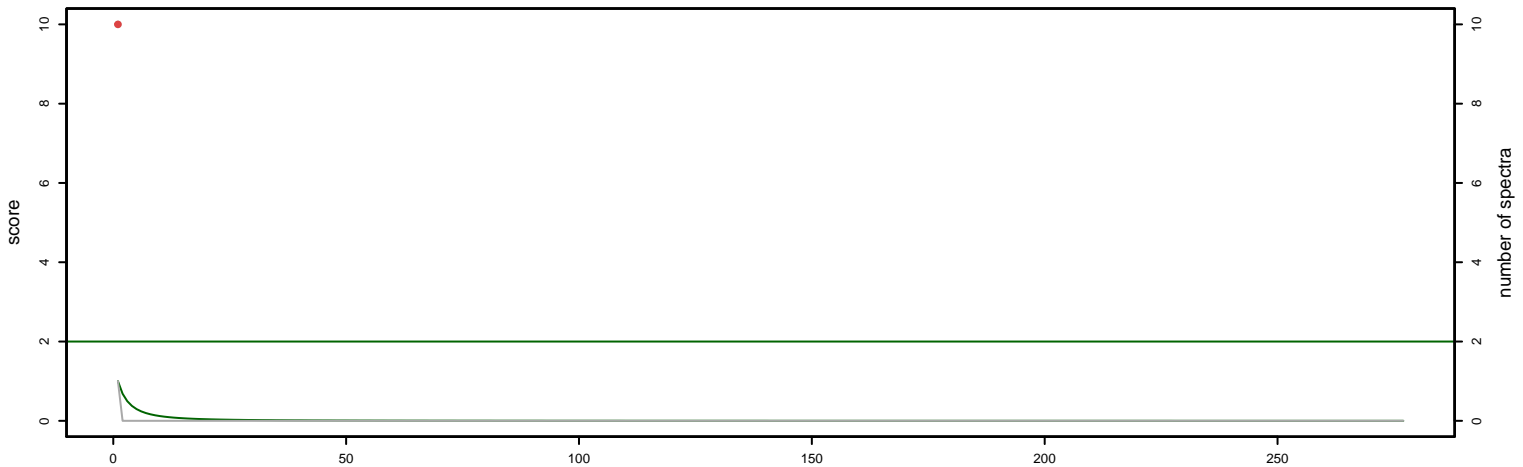

replica

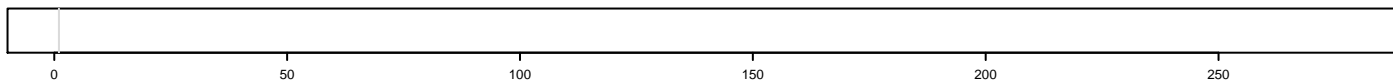

stability

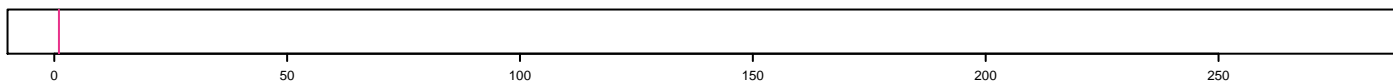

# Cyclin-dependent kinase 4 inhibitor C (P42773)

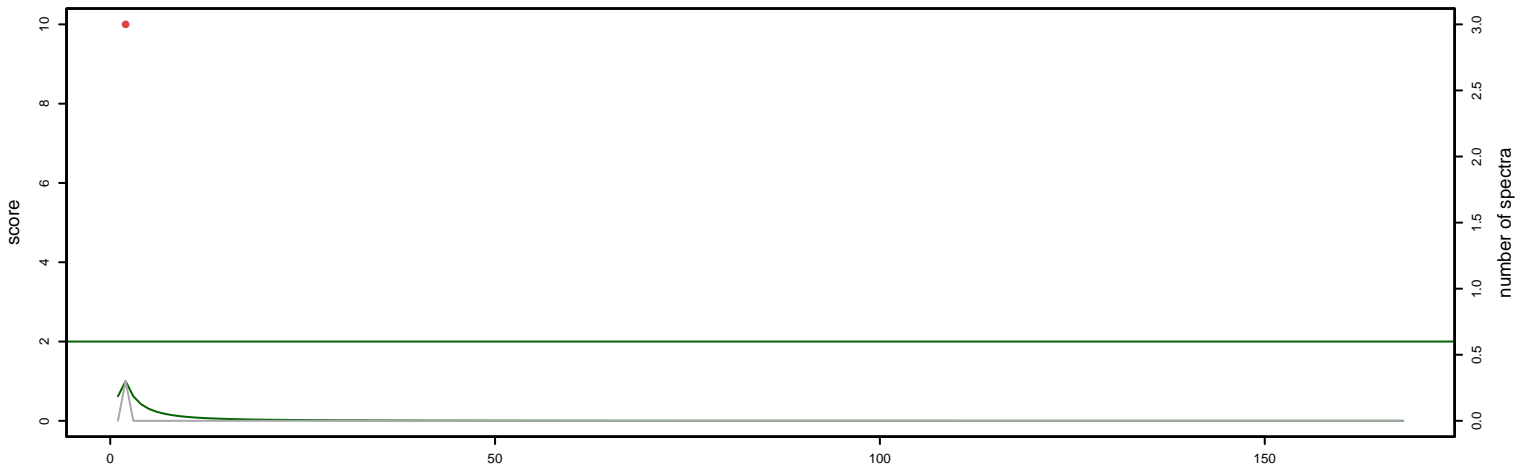

replica

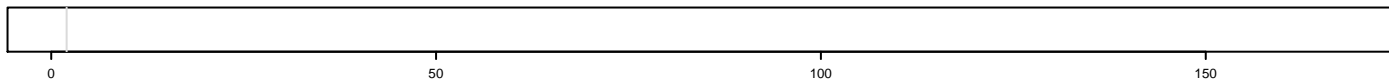

stability

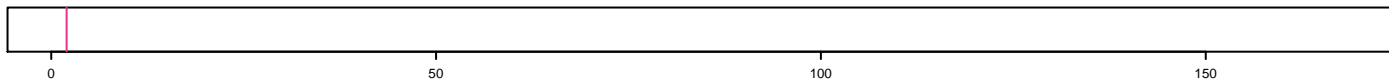

# Ran-specific GTPase-activating protein (P43487)

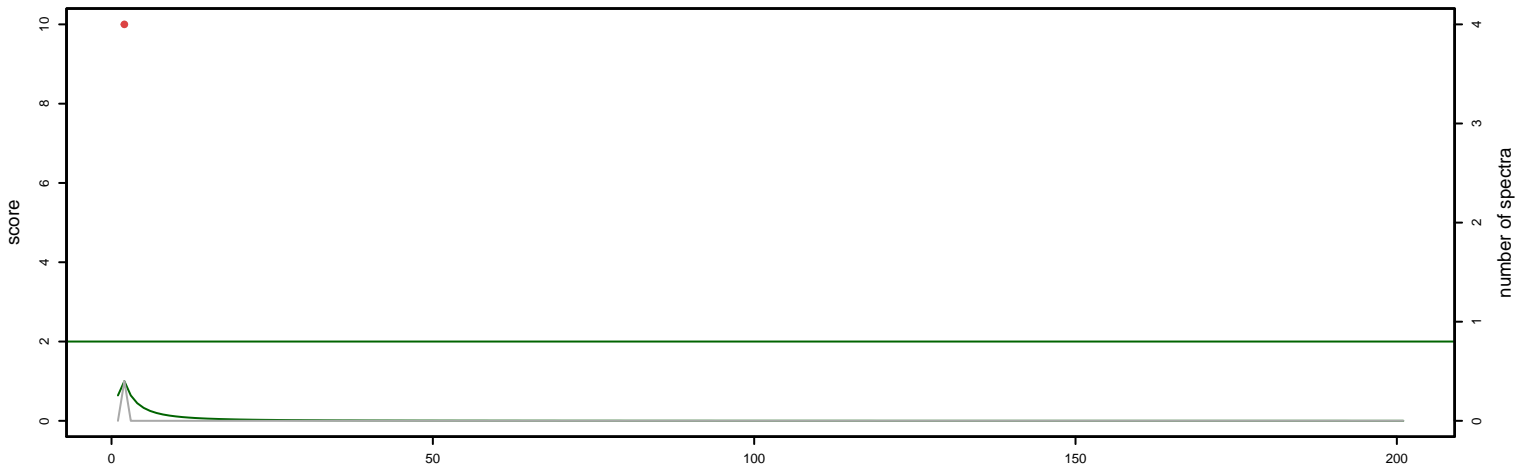

replica

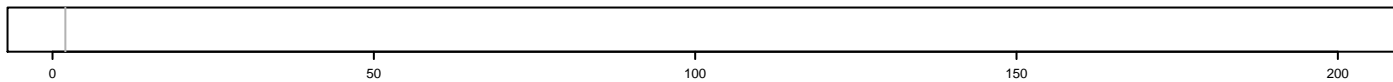

stability

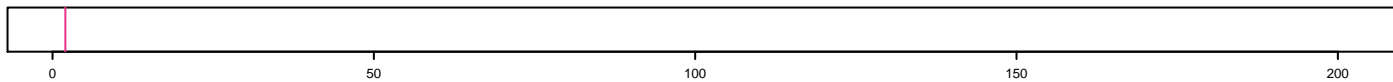

# Neuronal acetylcholine receptor subunit alpha-4 (P43681)

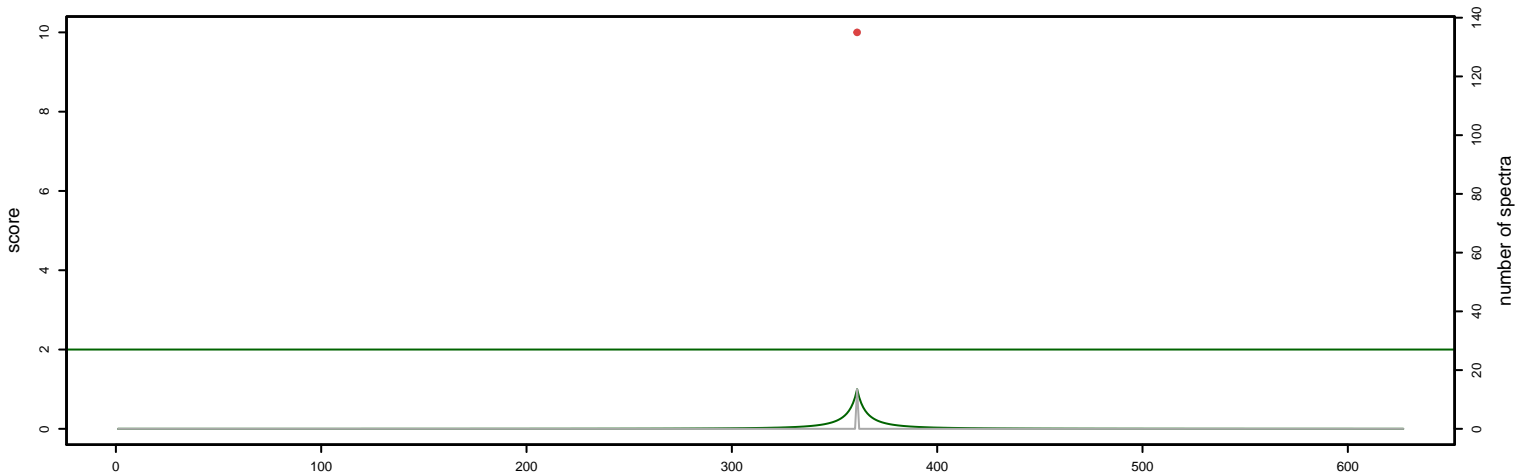

replica

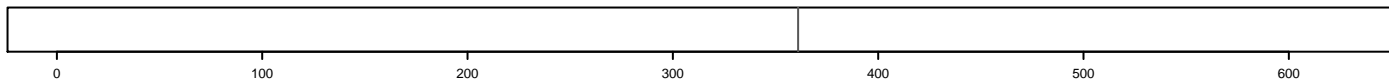

stability

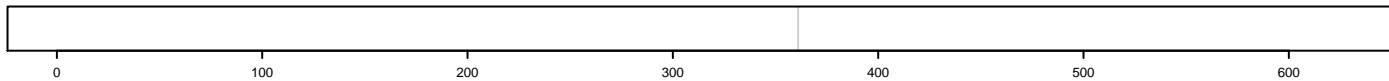

# Ubiquitin carboxyl-terminal hydrolase 5 (P45974)

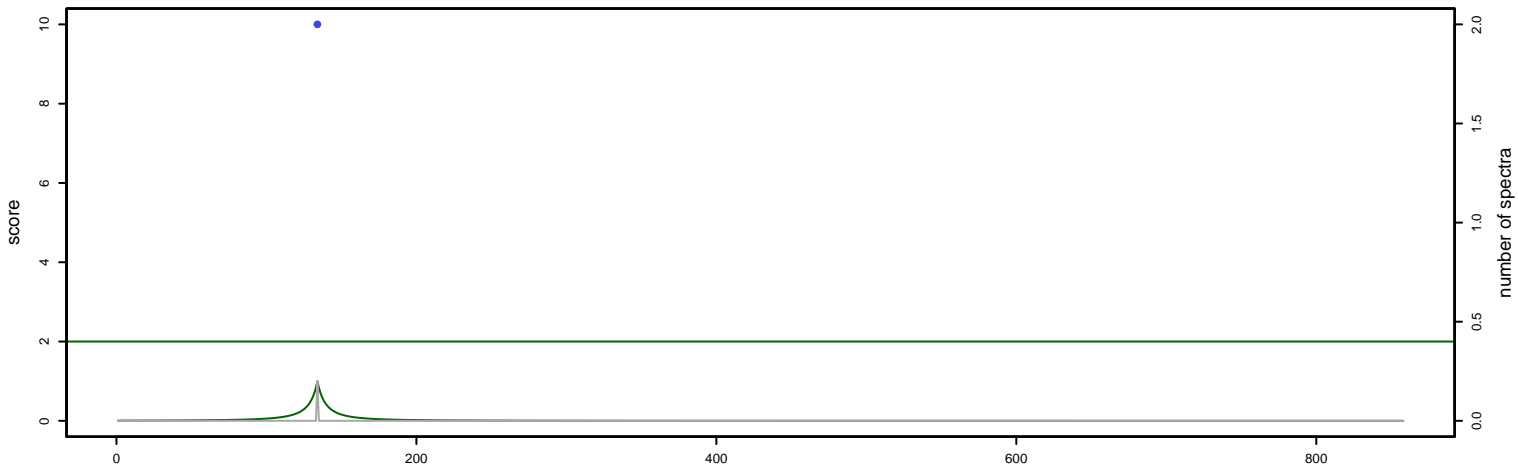

replica

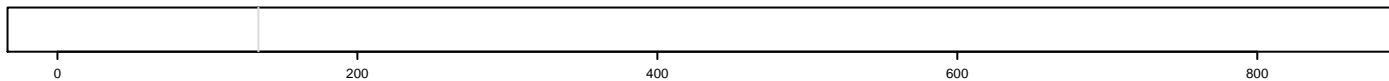

stability

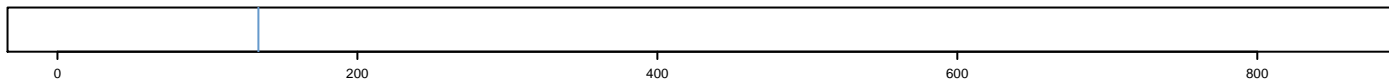

### Dual specificity mitogen-activated protein kinase kinase 4 (P45985)

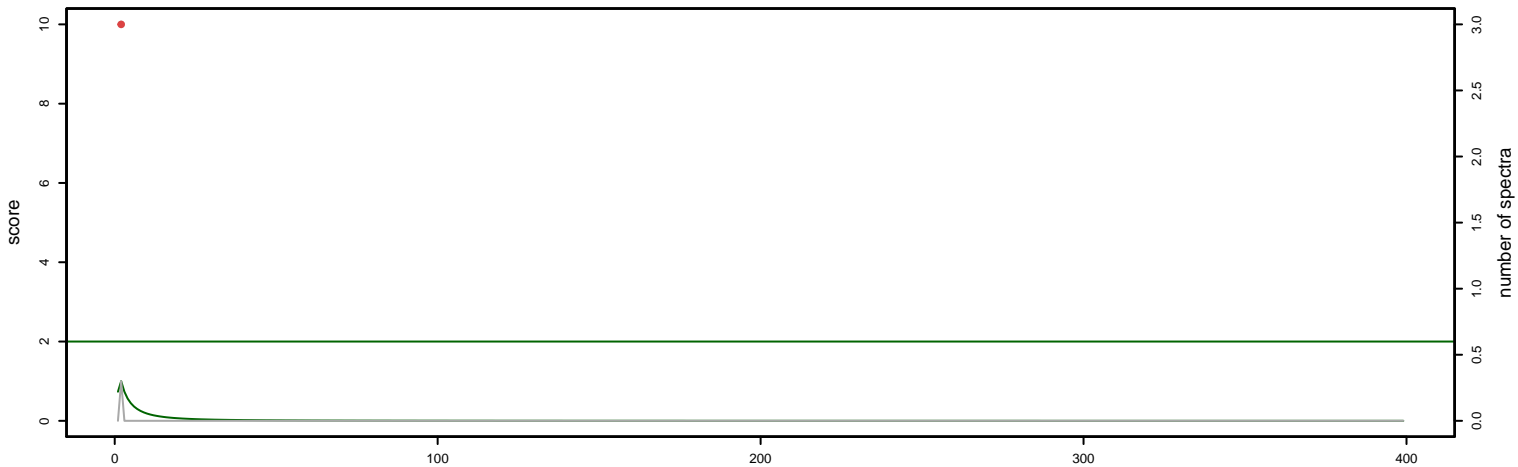

replica

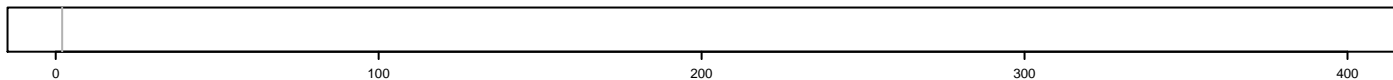

stability

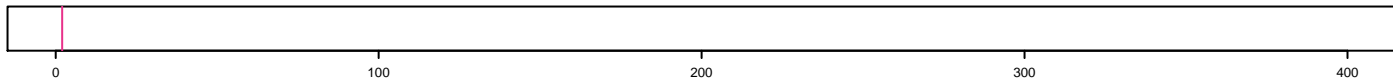

# Ran GTPase-activating protein 1 (P46060)

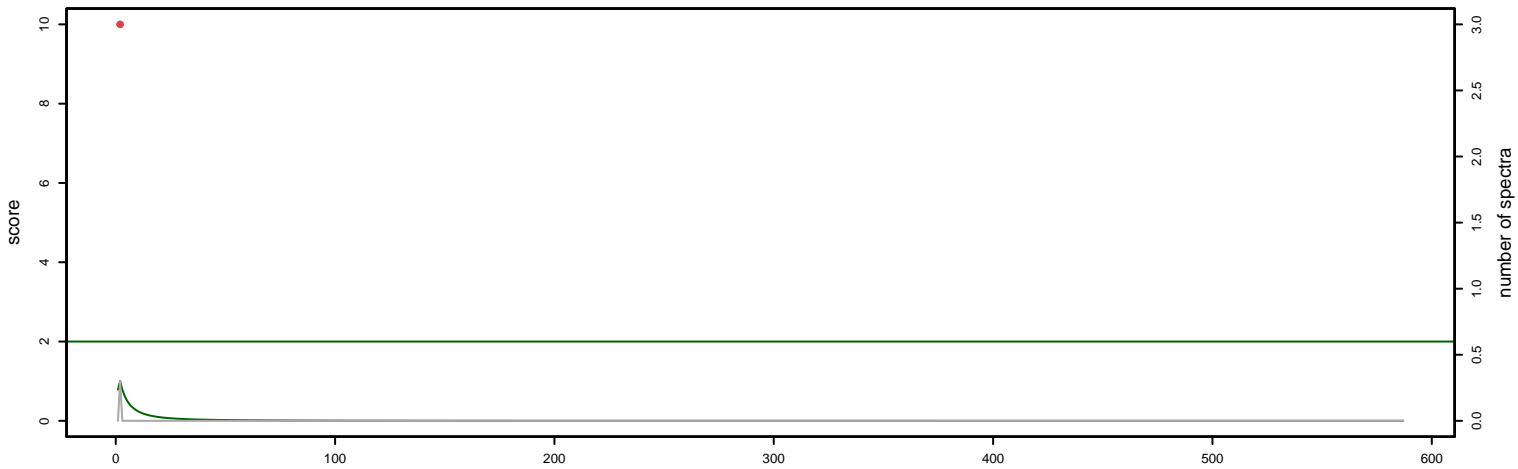

replica

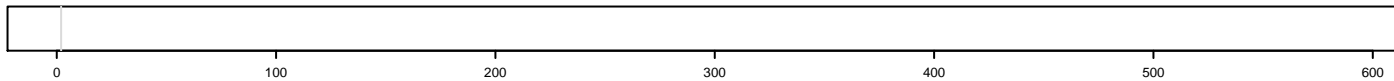

stability

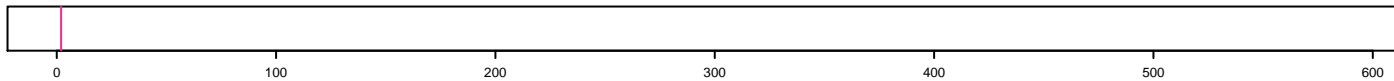

### Adapter molecule crk (P46108)

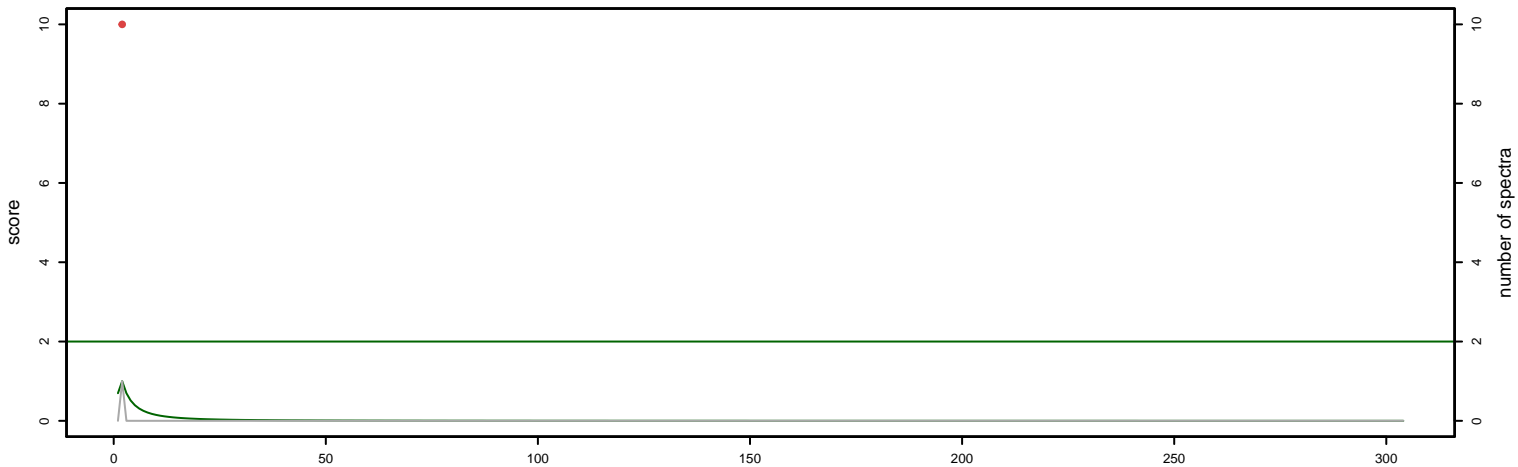

replica

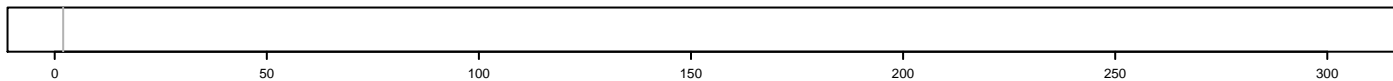

stability

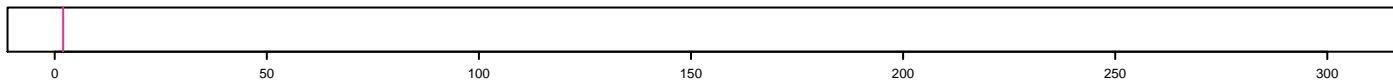



### Dual specificity mitogen-activated protein kinase kinase 3 (P46734)

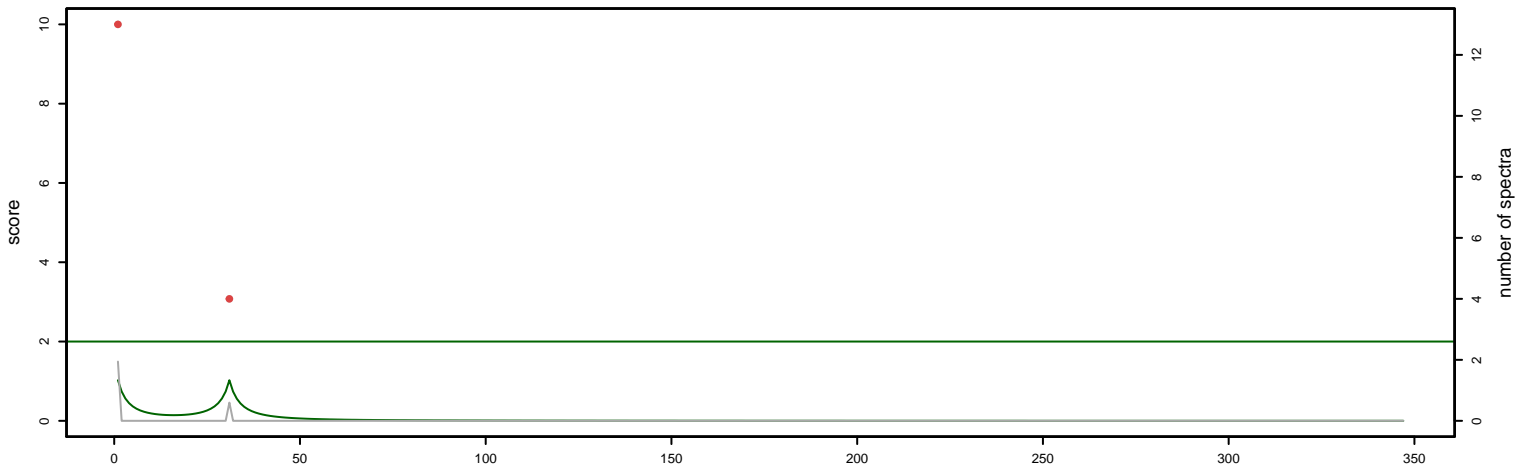

replica

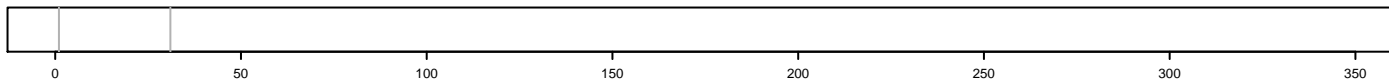

stability

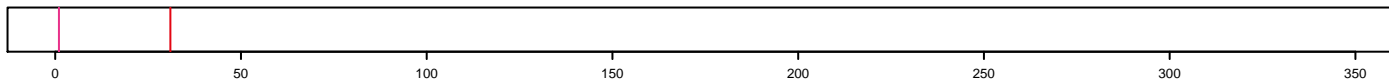

### E3 ubiquitin-protein ligase NEDD4 (P46934-4)

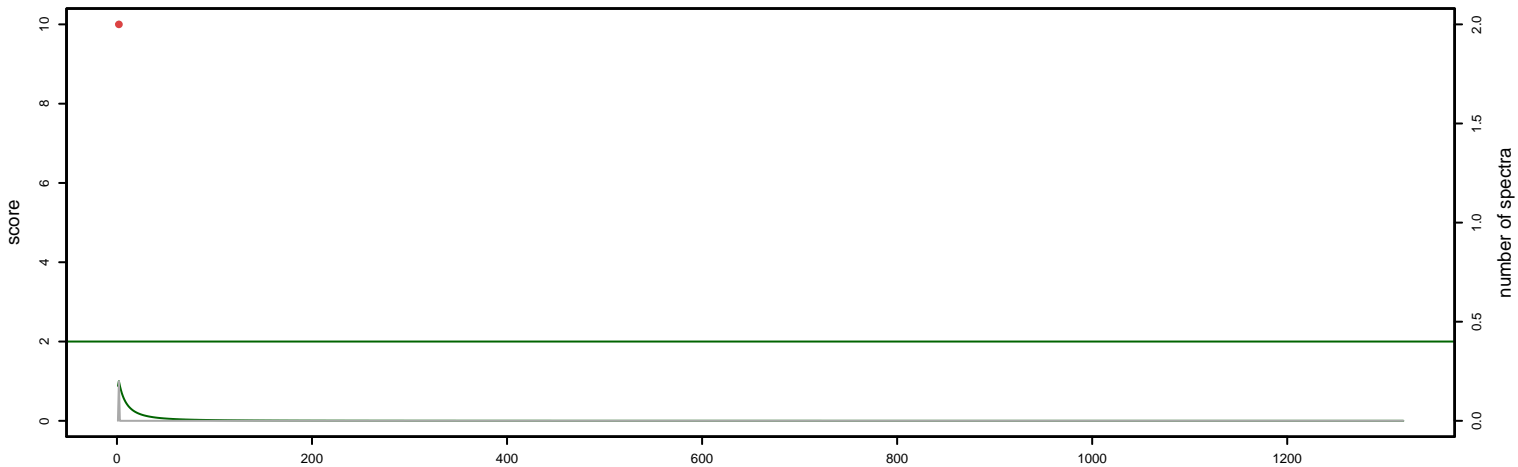

replica

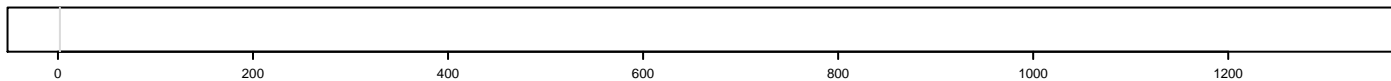

stability

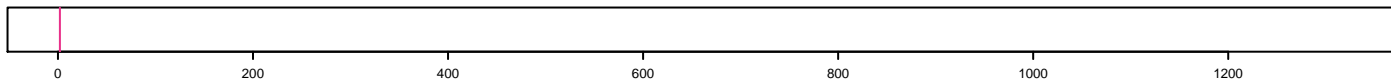

### Guanine nucleotide exchange factor MSS4 (P47224)

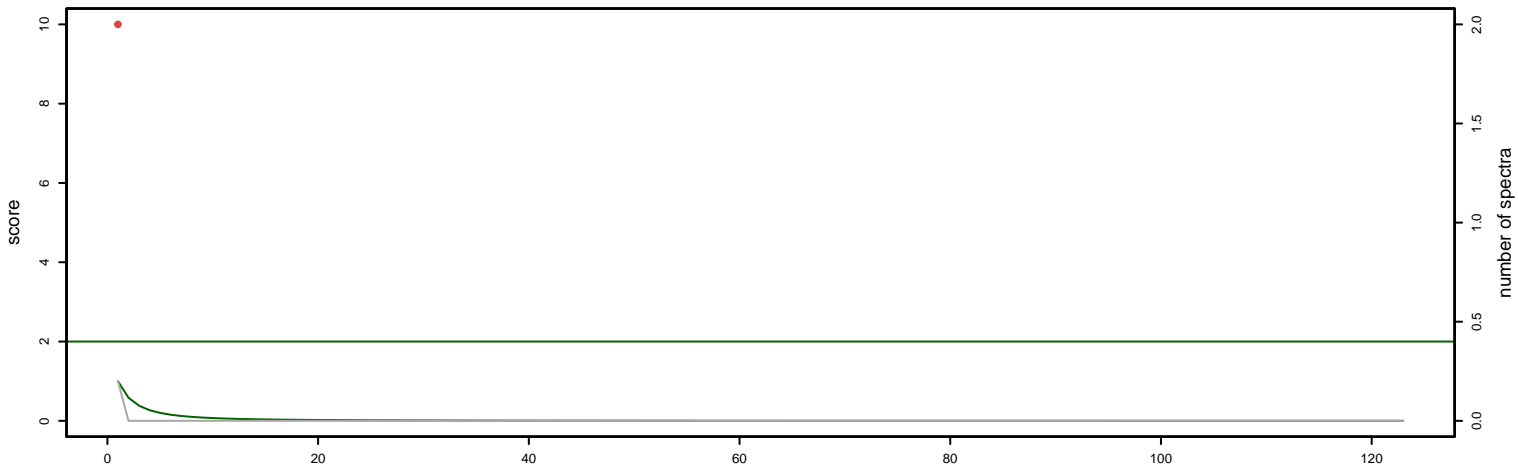

replica

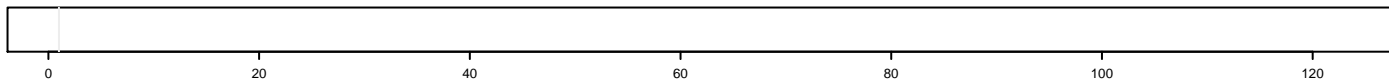

stability

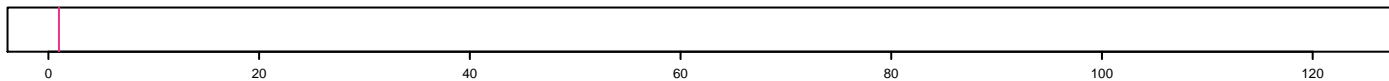

### F-actin-capping protein subunit alpha-2 (P47755)

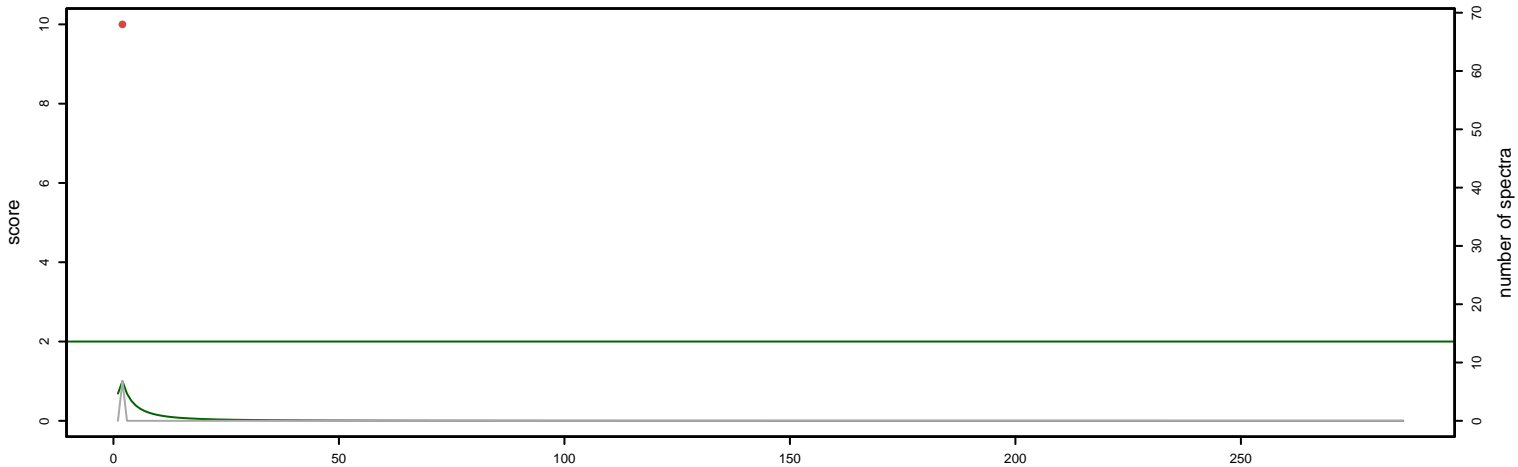

replica

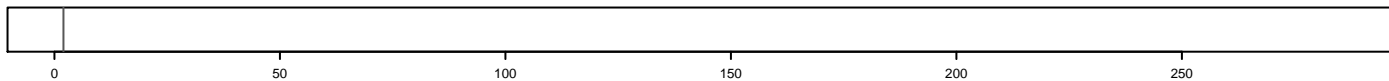

stability

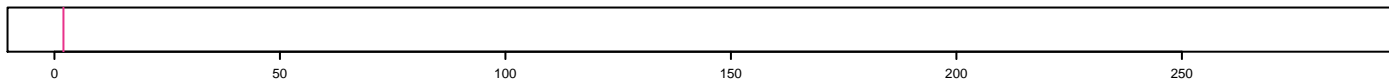

# F-actin-capping protein subunit beta (P47756)

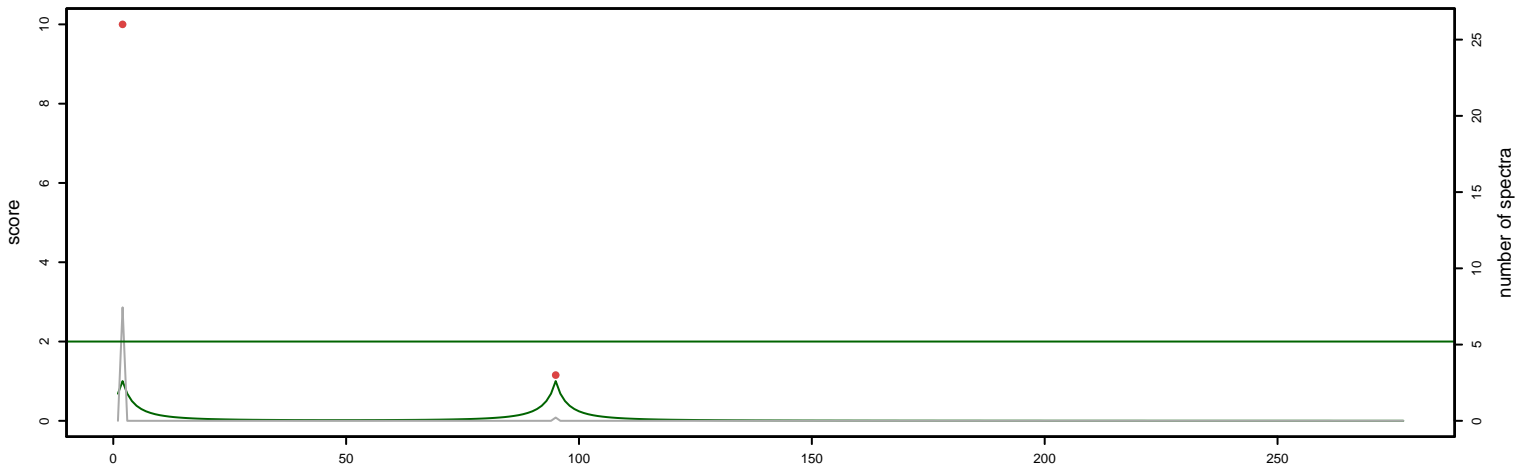

replica

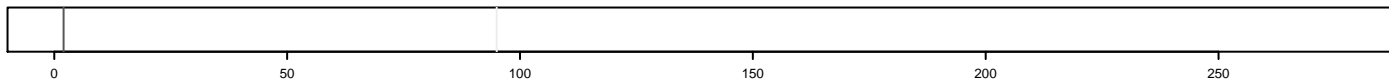

stability

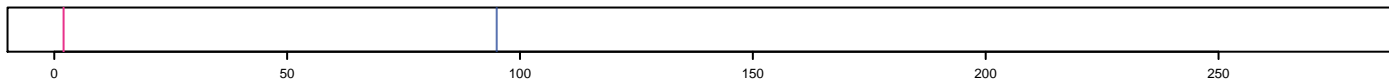

# Prolyl endopeptidase (P48147)

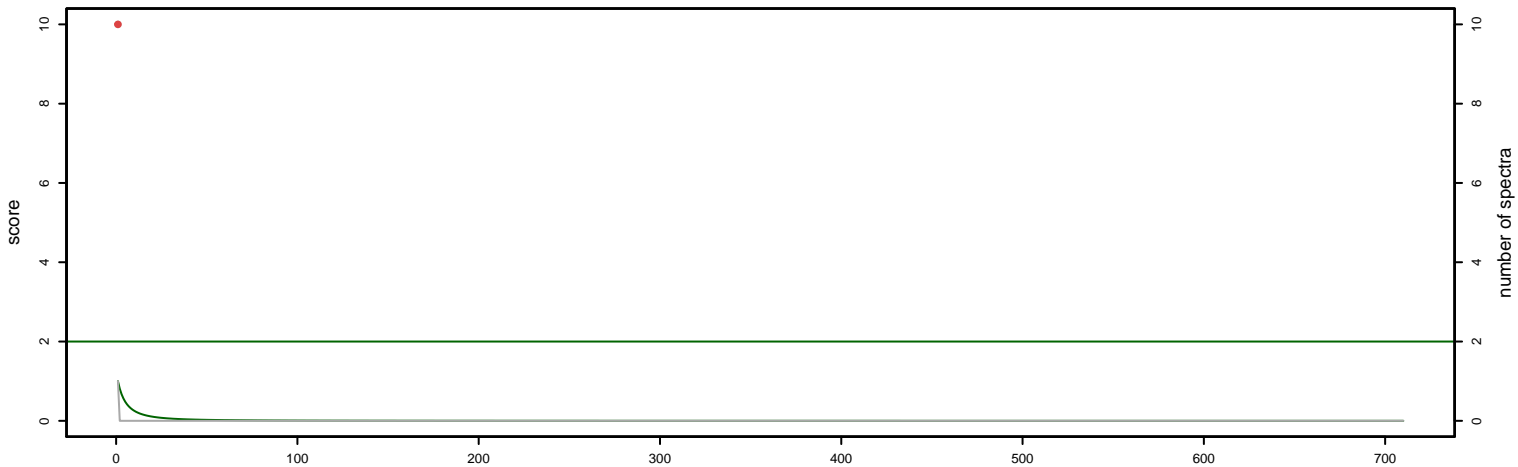

replica

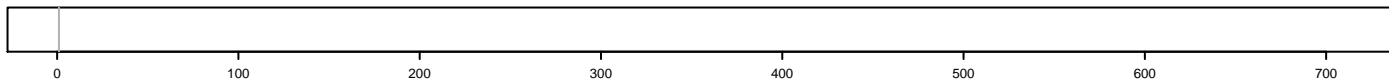

stability

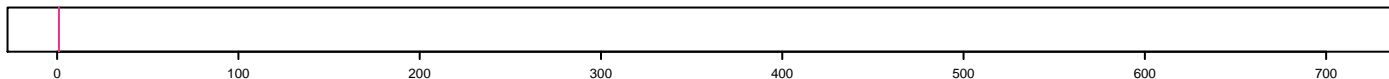

# Phosphatidylinositol 5-phosphate 4-kinase type-2 alpha (P48426)

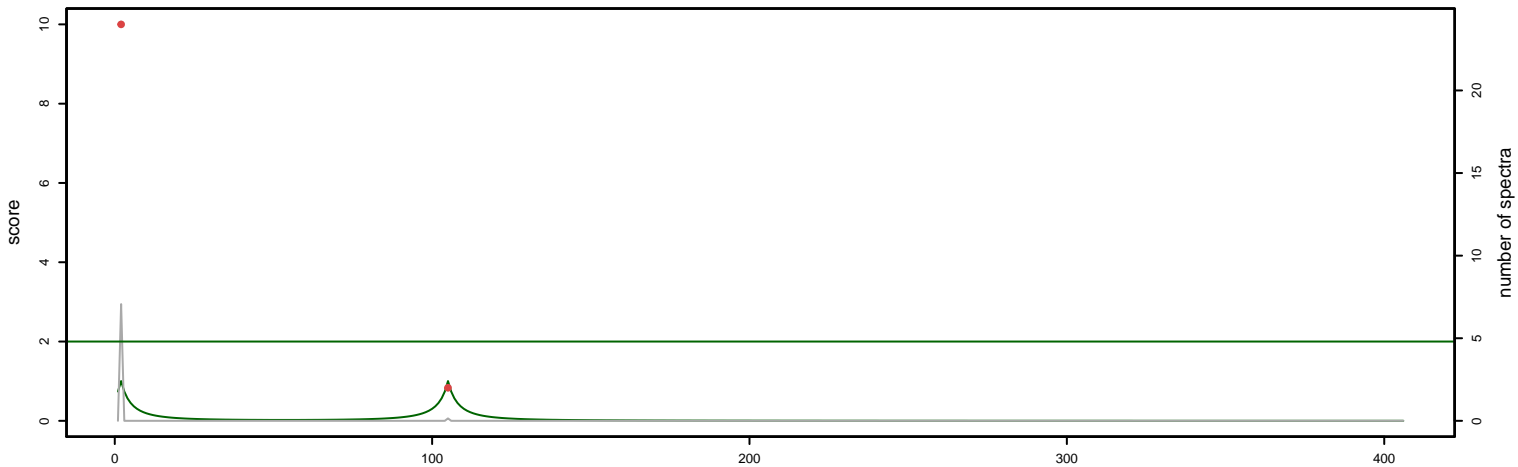

replica

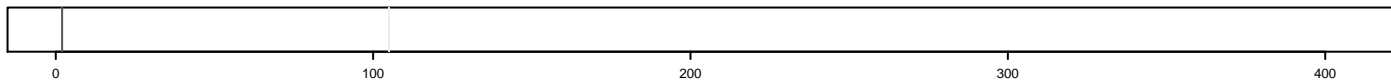

stability

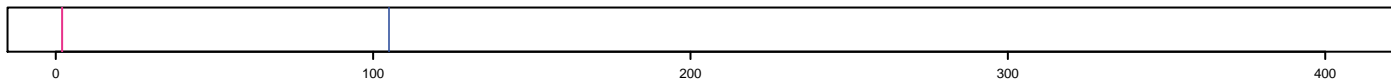

# Glutamate--cysteine ligase catalytic subunit (P48506)

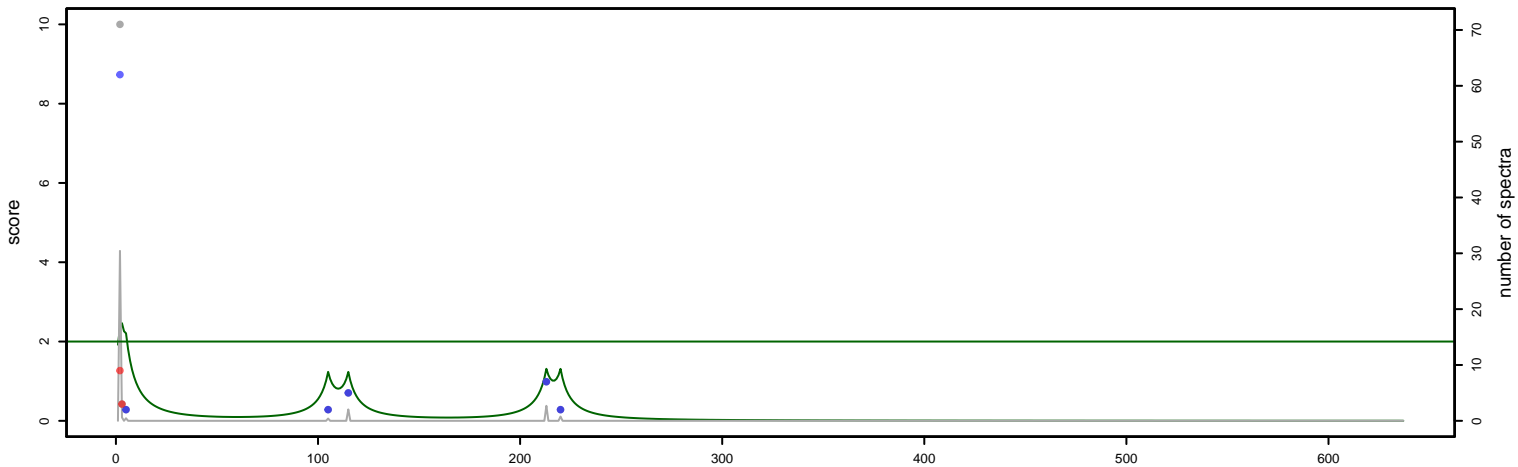

replica

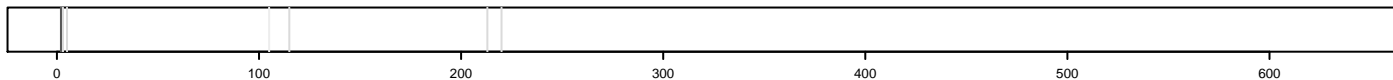

stability

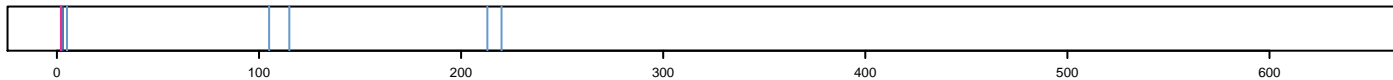



# Glutamate--cysteine ligase regulatory subunit (P48507)

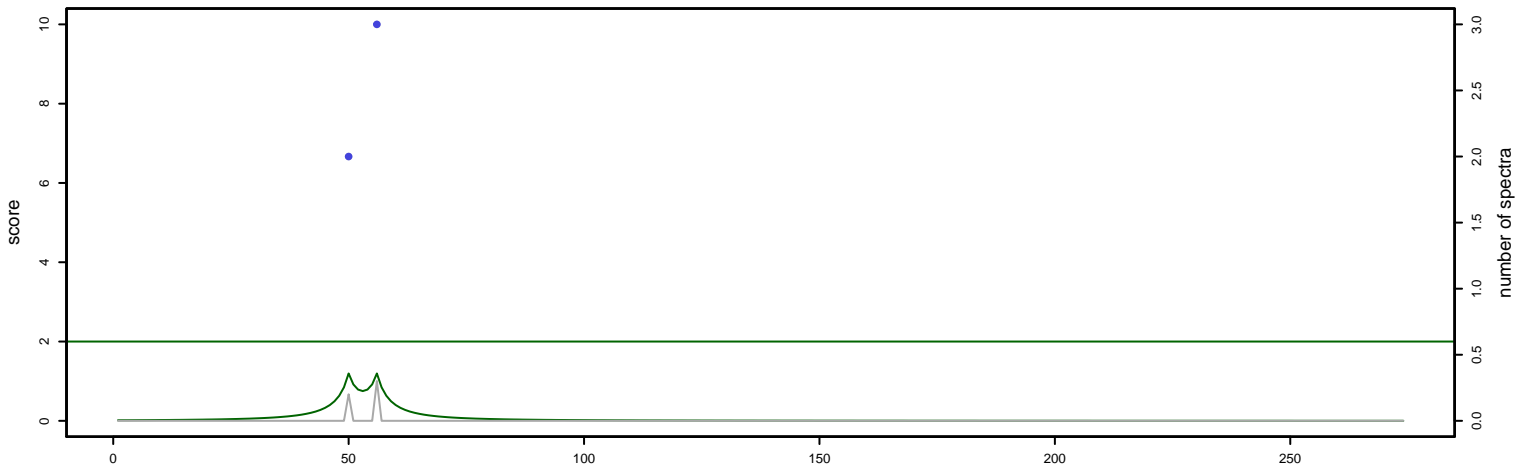

replica

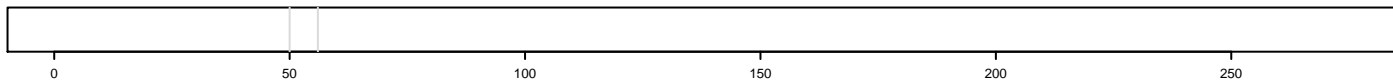

stability

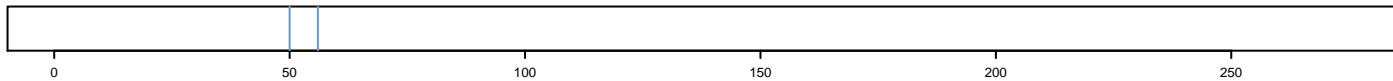

### Glutathione synthetase (P48637)

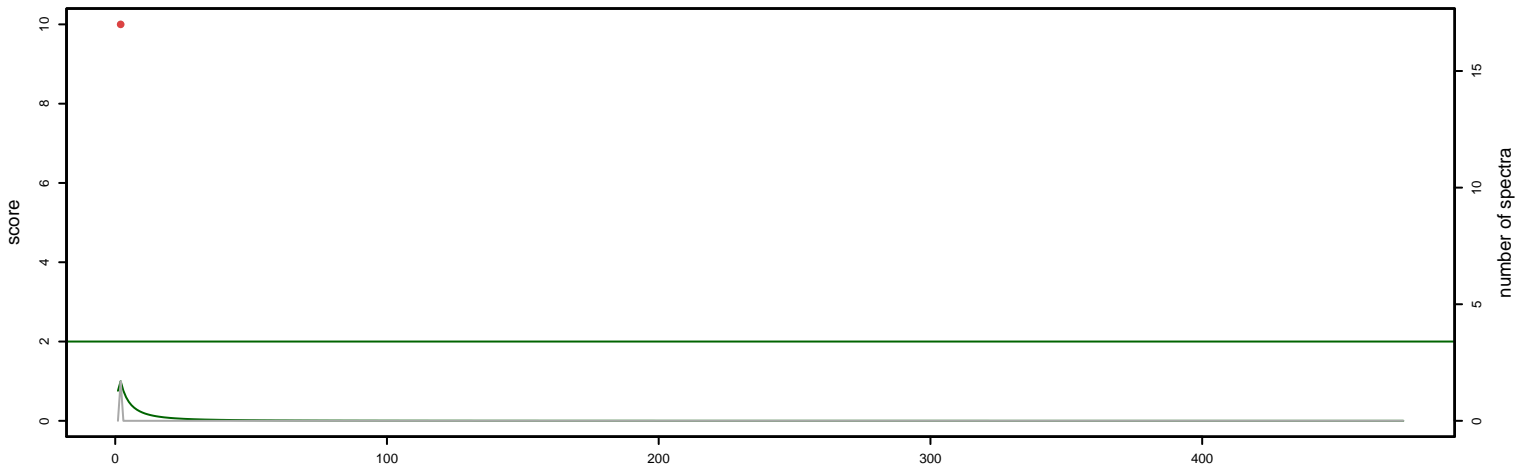

replica

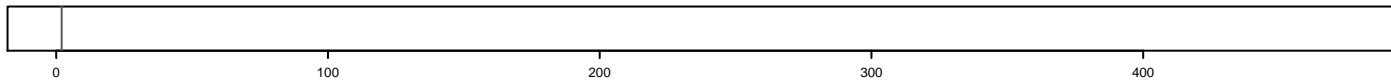

stability

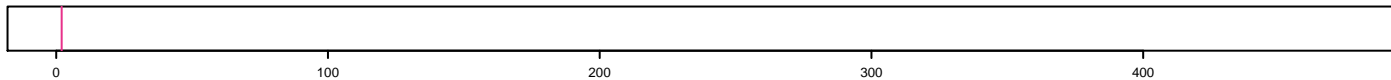

# T-complex protein 1 subunit epsilon (P48643)

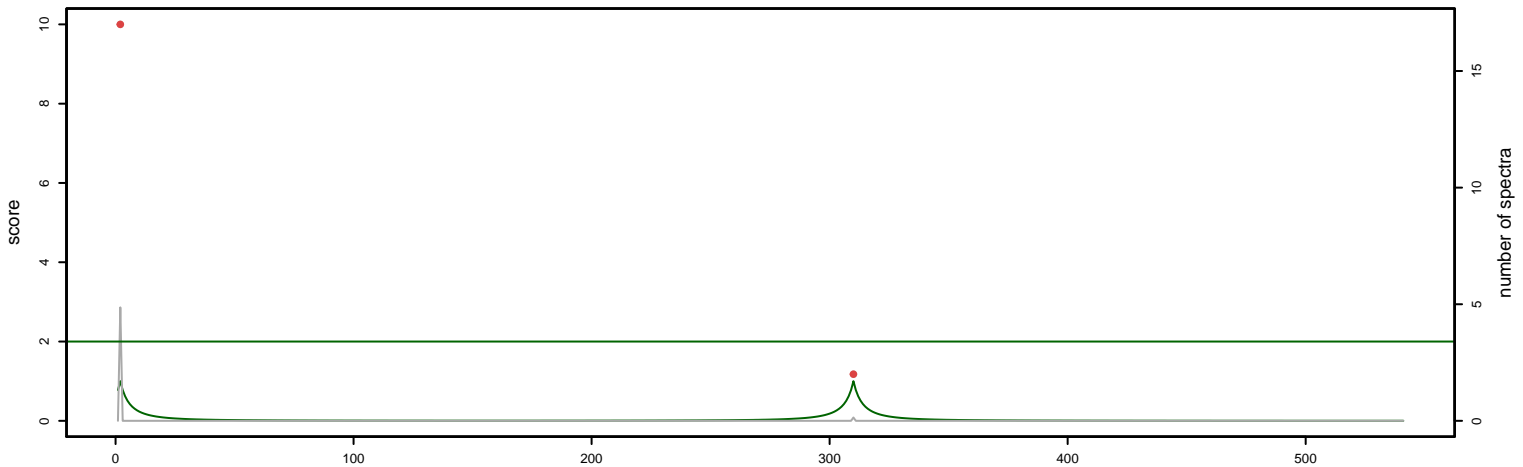

replica

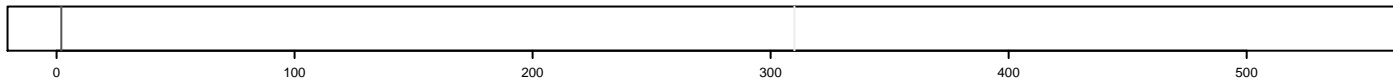

stability

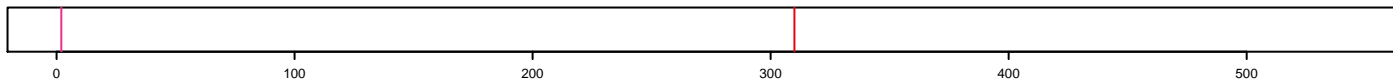

### Casein kinase I isoform alpha (P48729)

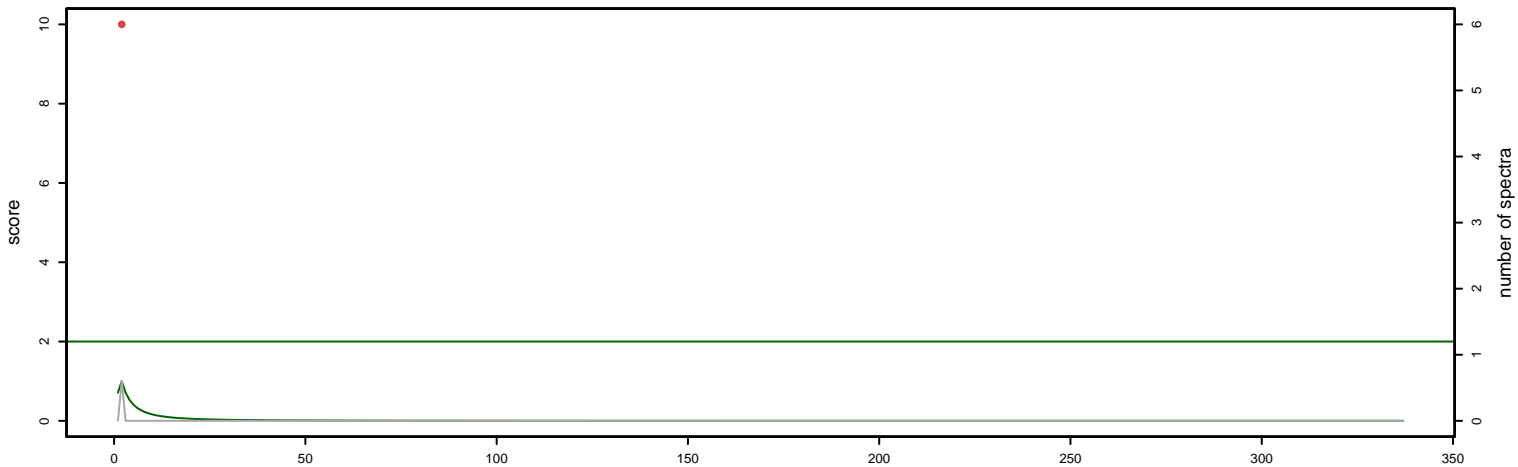

replica

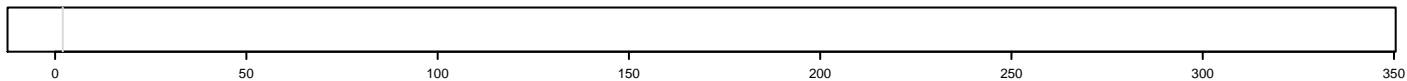

stability

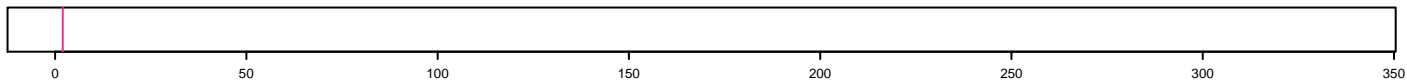

# Phosphatidylinositol transfer protein beta isoform (P48739)

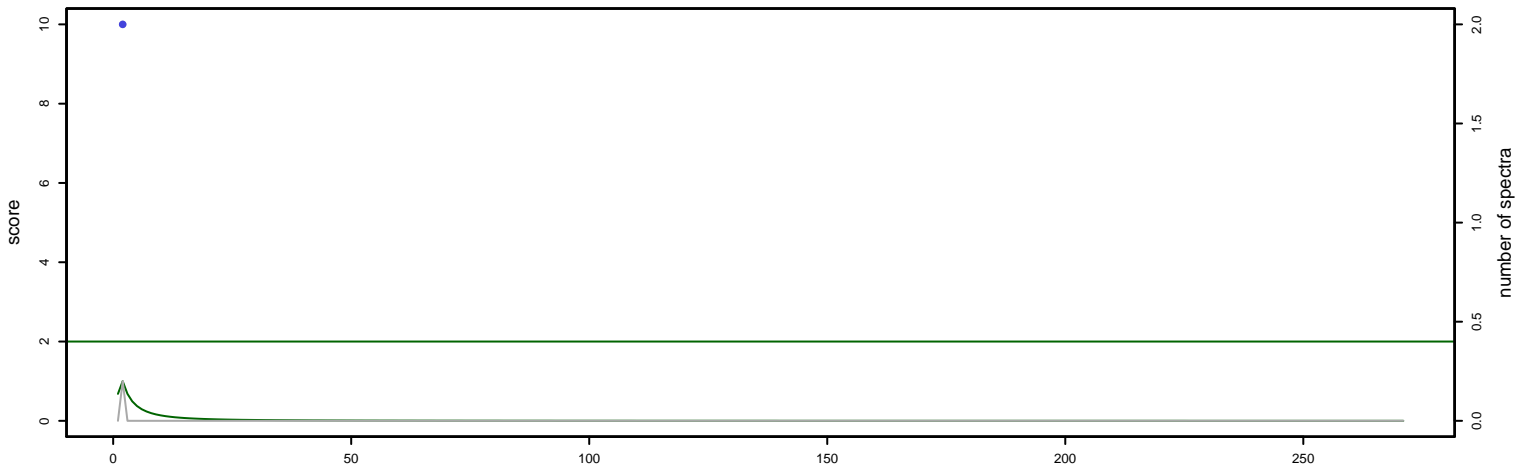

replica

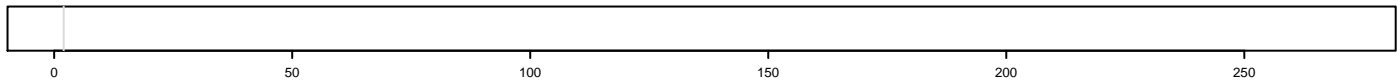

stability

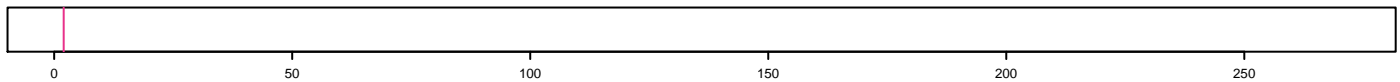

# 4-trimethylaminobutyraldehyde dehydrogenase (P49189)

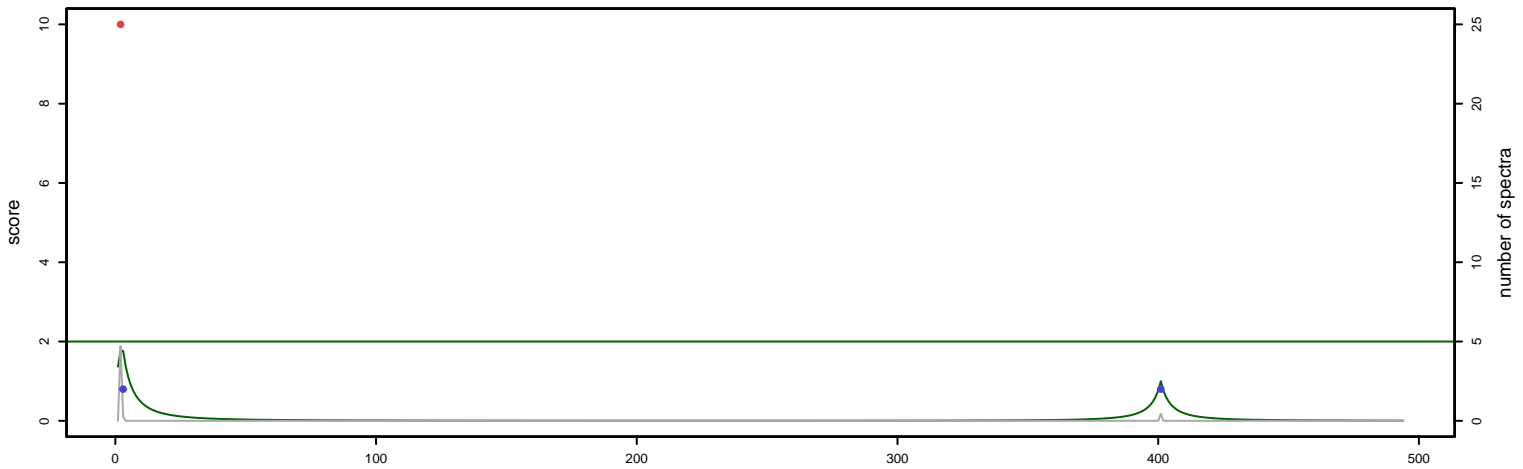

replica

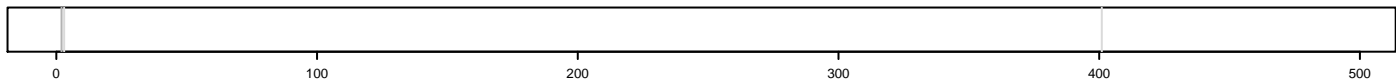

stability

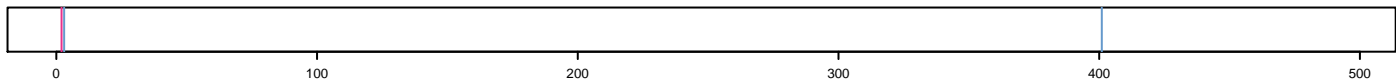

# Ribose-5-phosphate isomerase (P49247)

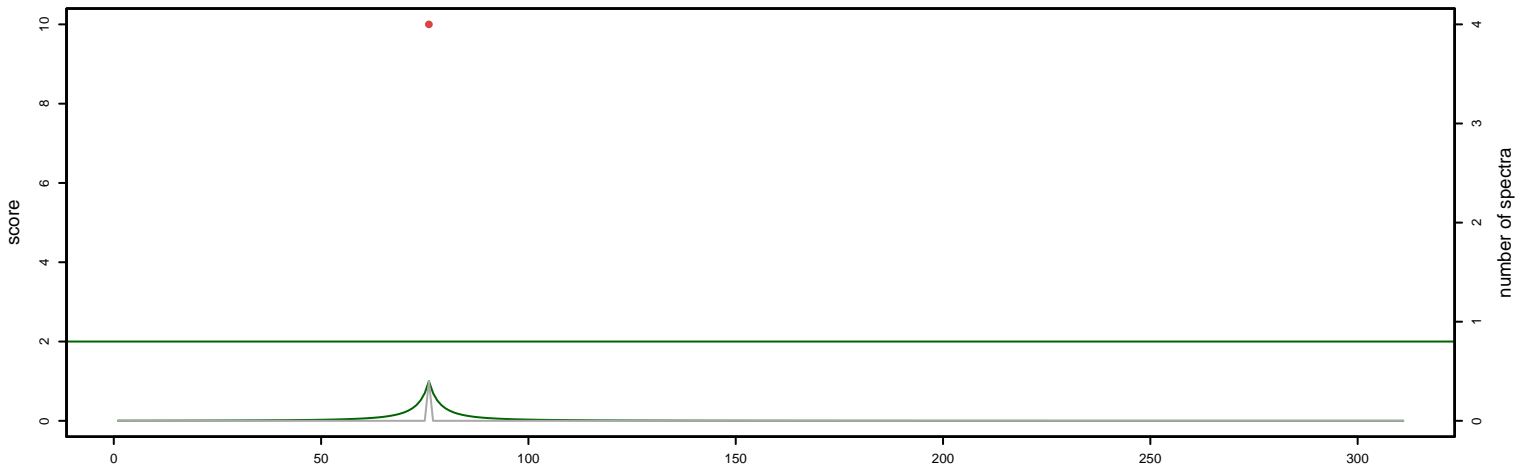

replica

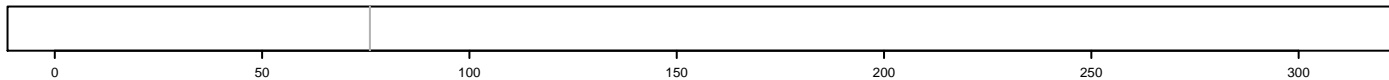

stability

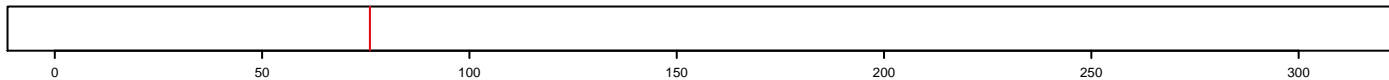

# Protein ERGIC-53 (P49257)

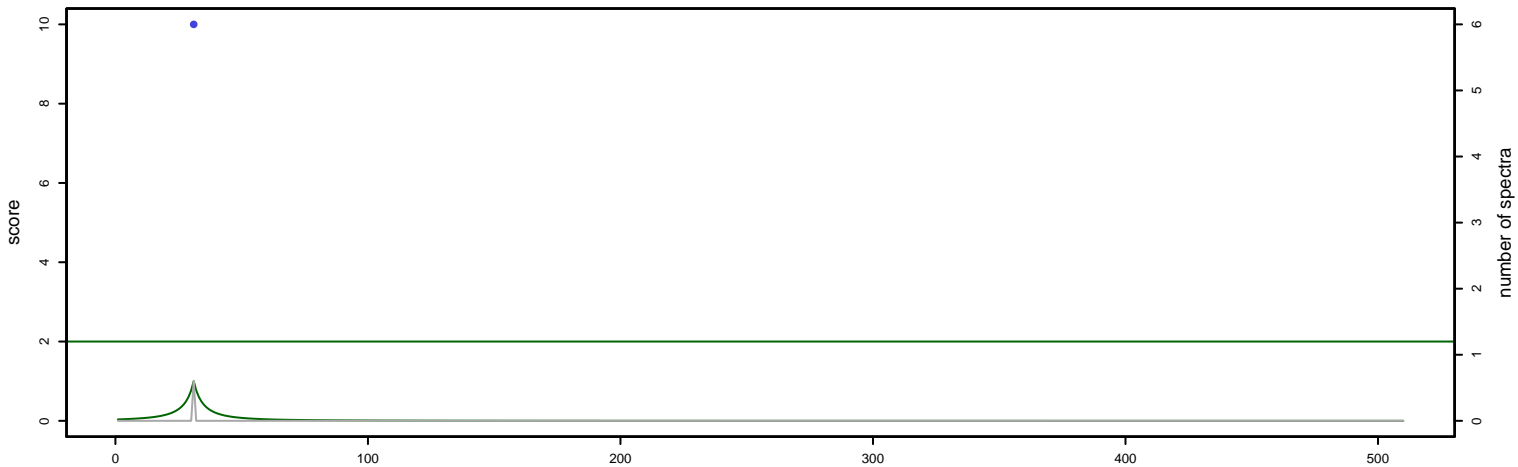

replica

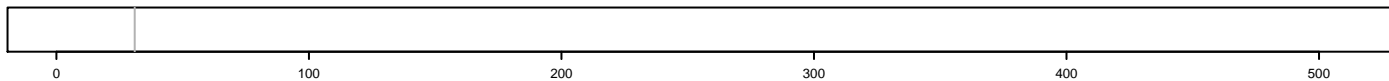

stability

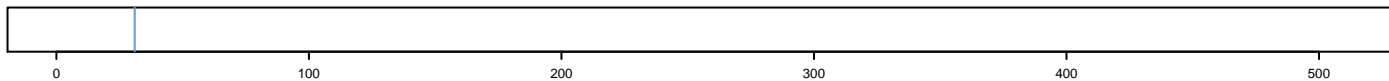



# T-complex protein 1 subunit gamma (P49368)

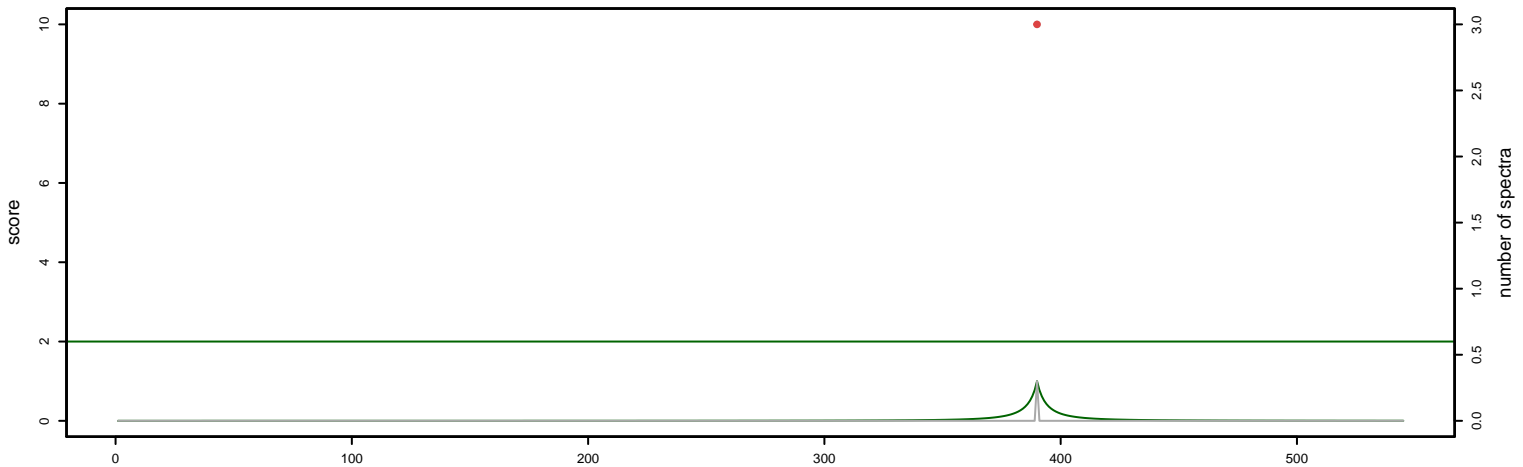

replica

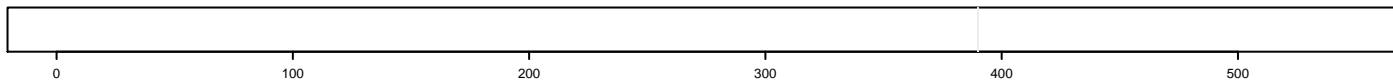

stability

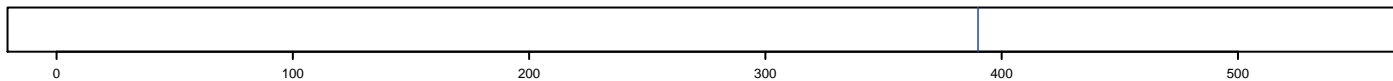

# Alanine--tRNA ligase, cytoplasmic (P49588)

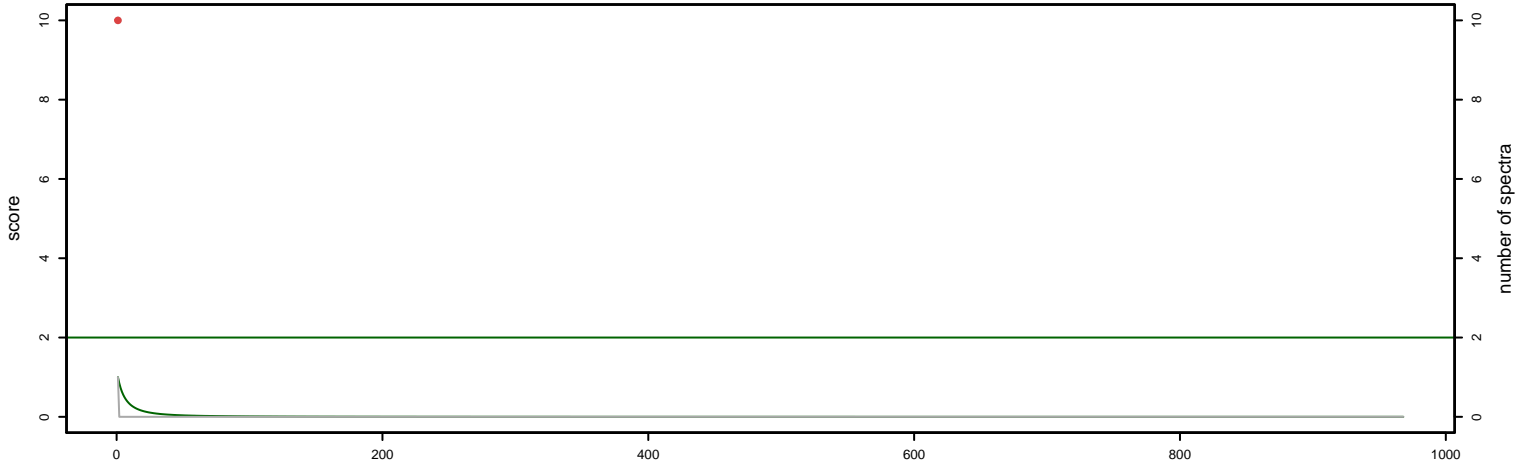

replica

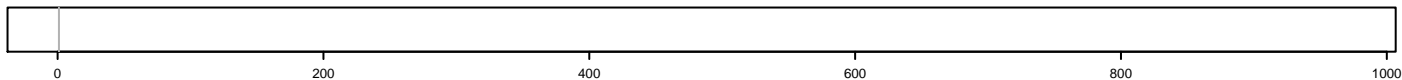

stability

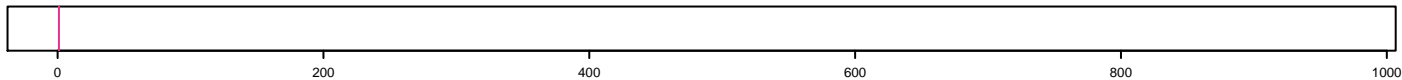

# Protein phosphatase 1F (P49593)

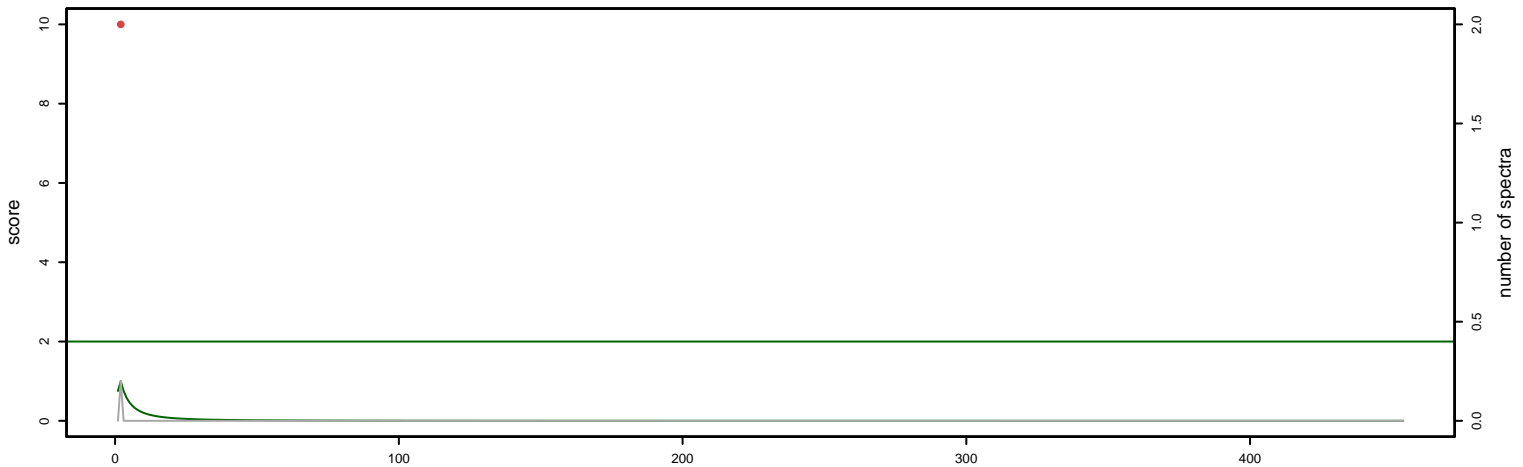

replica

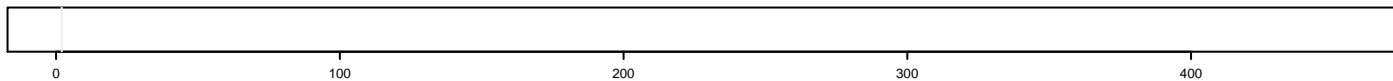

stability

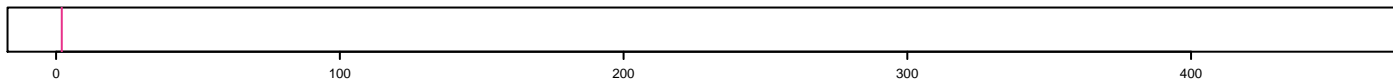

# Proteasome subunit beta type-3 (P49720)

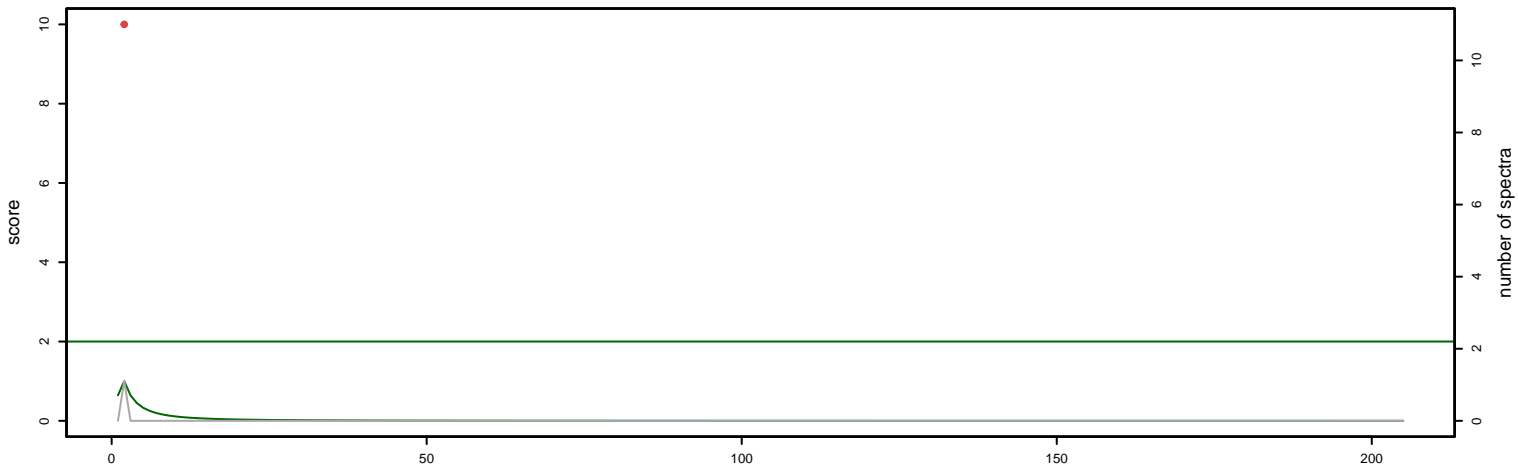

replica

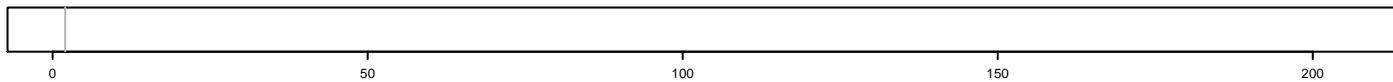

stability

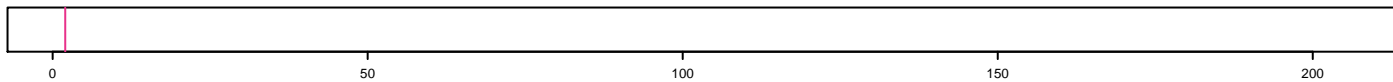

# Proteasome subunit beta type-2 (P49721)

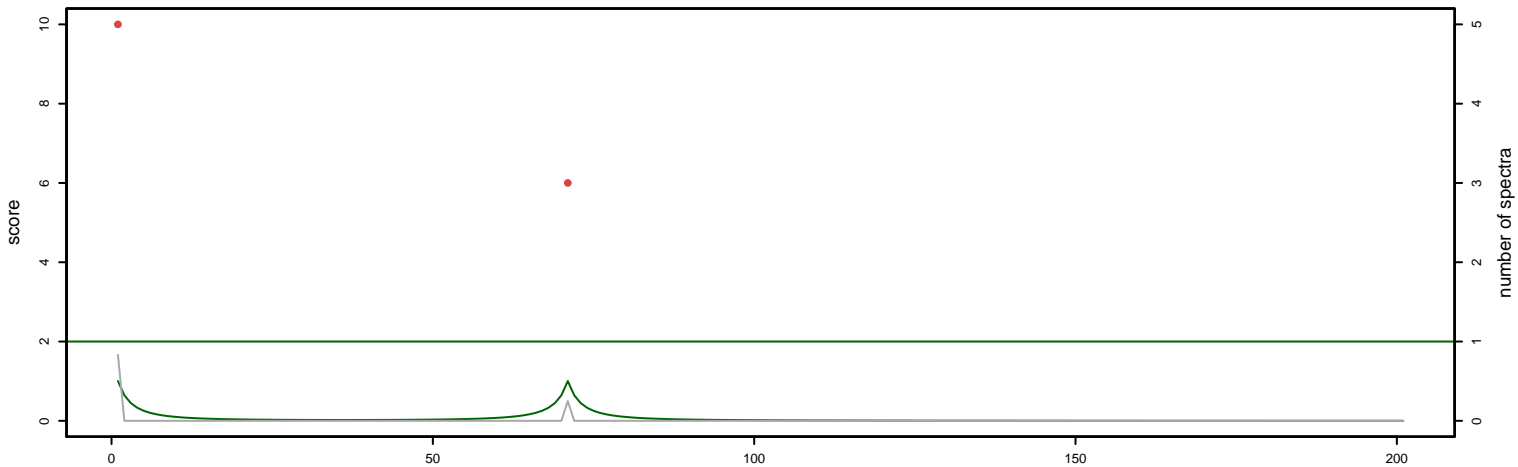

replica

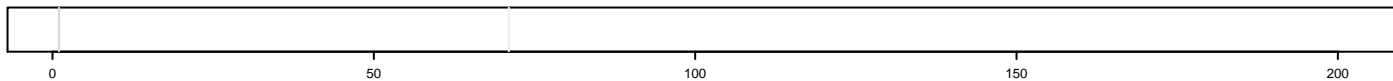

stability

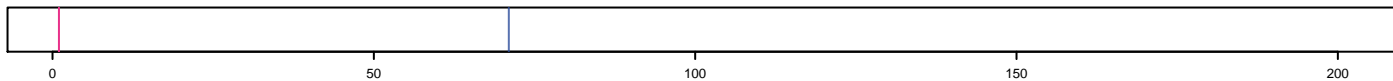

### Histidine triad nucleotide-binding protein 1 (P49773)

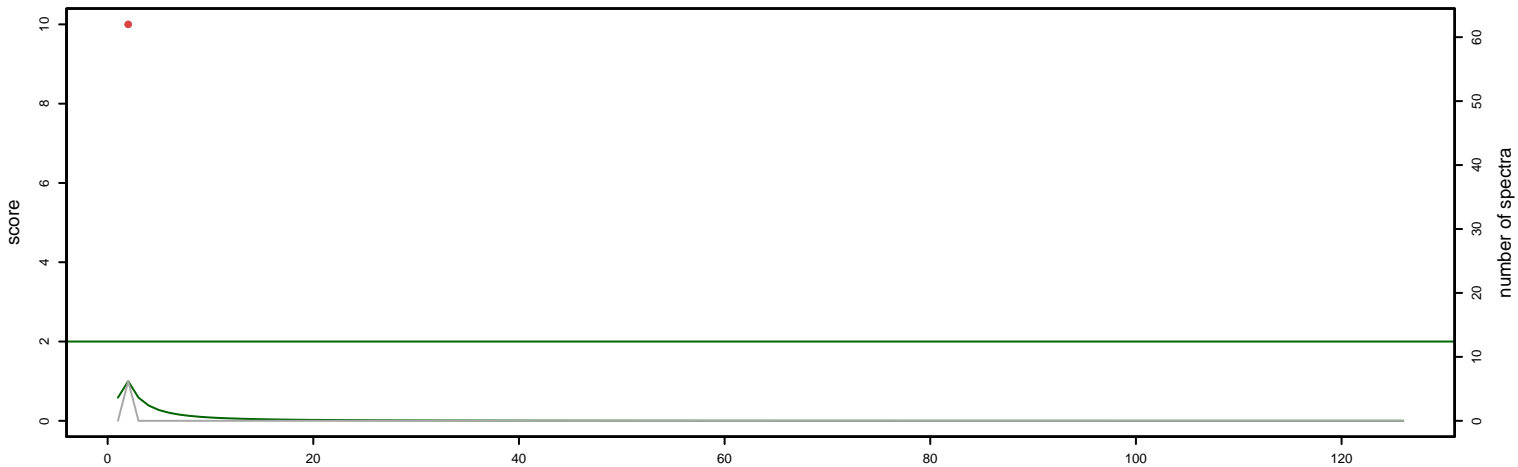

replica

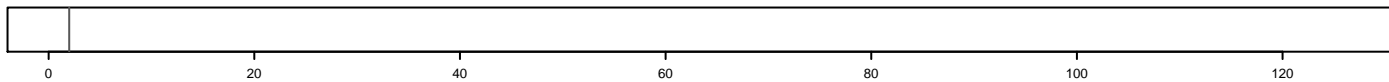

stability

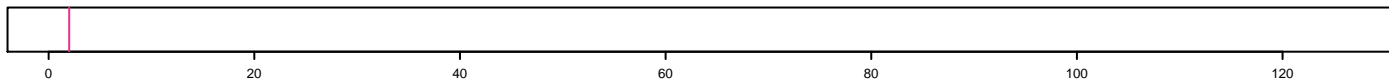

# Nuclear pore complex protein Nup153 (P49790)

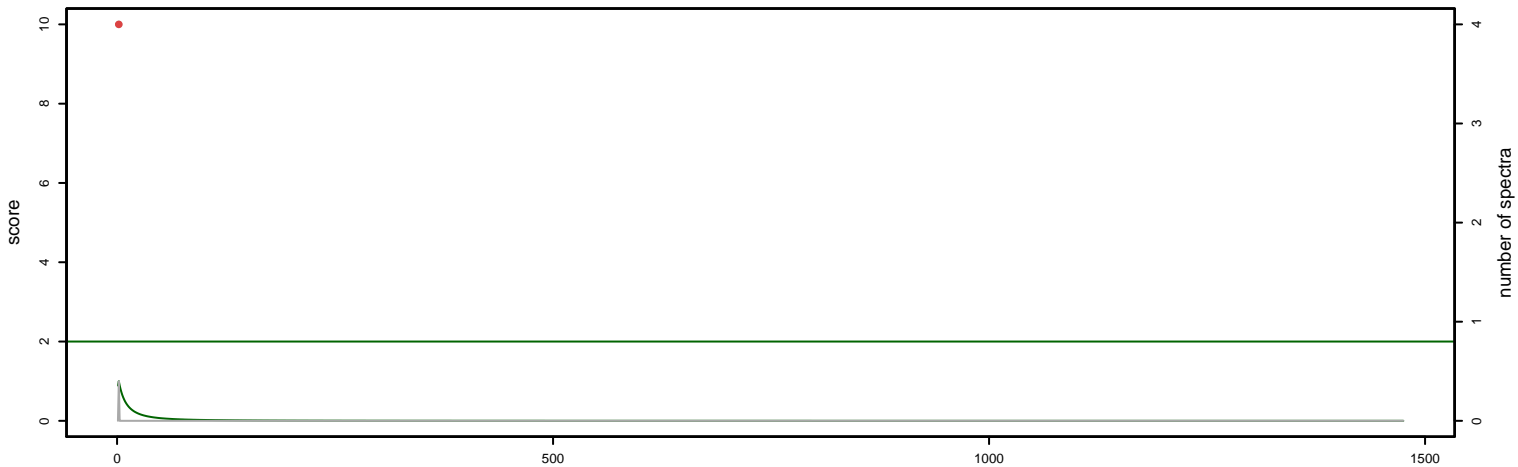

replica

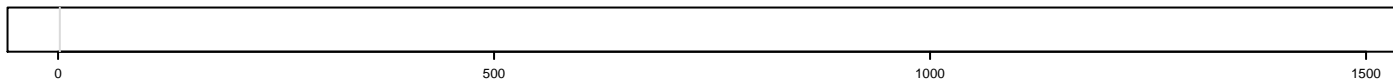

stability

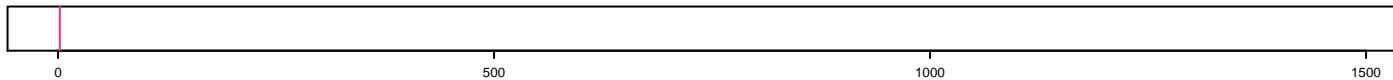

### 5-formyltetrahydrofolate cyclo-ligase (P49914)

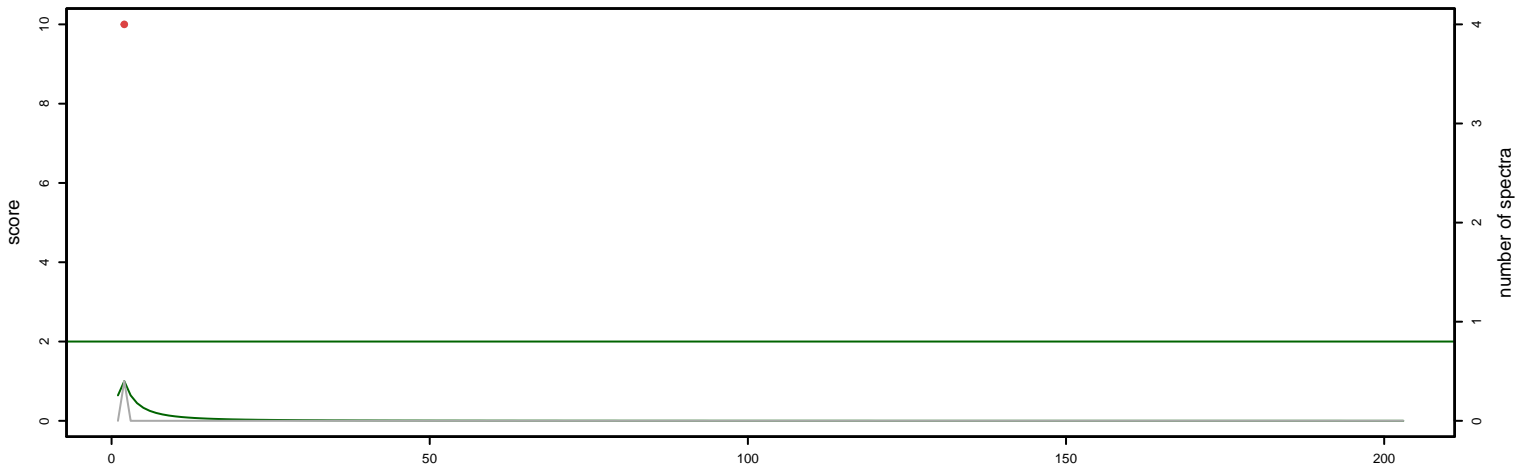

**replica**

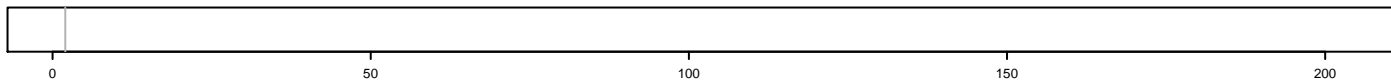

**stability**

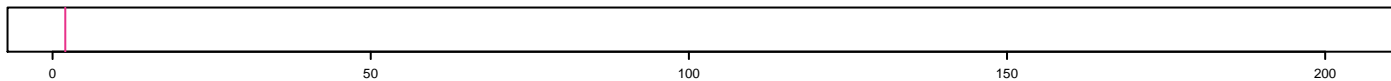



# Rab GDP dissociation inhibitor beta (P50395)

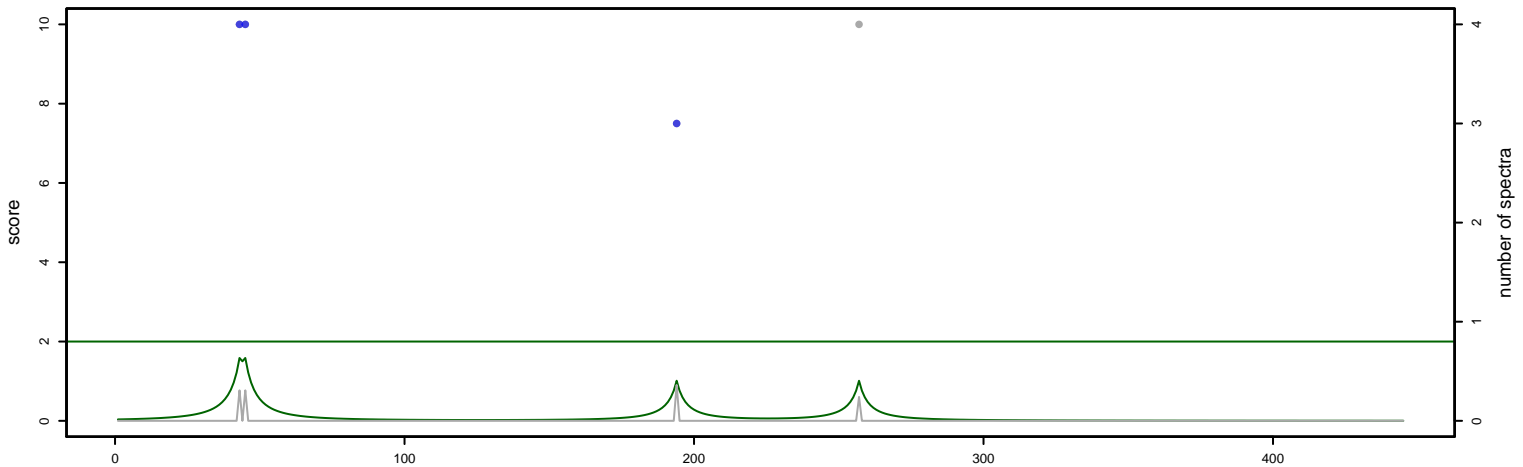

replica

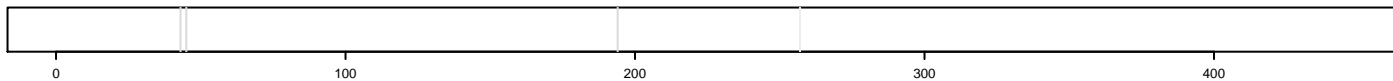

stability

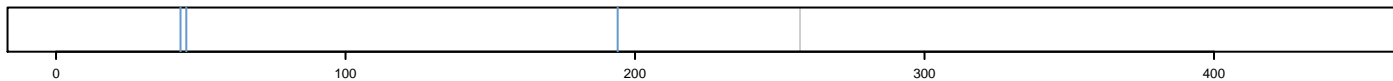

# Emerin (P50402)

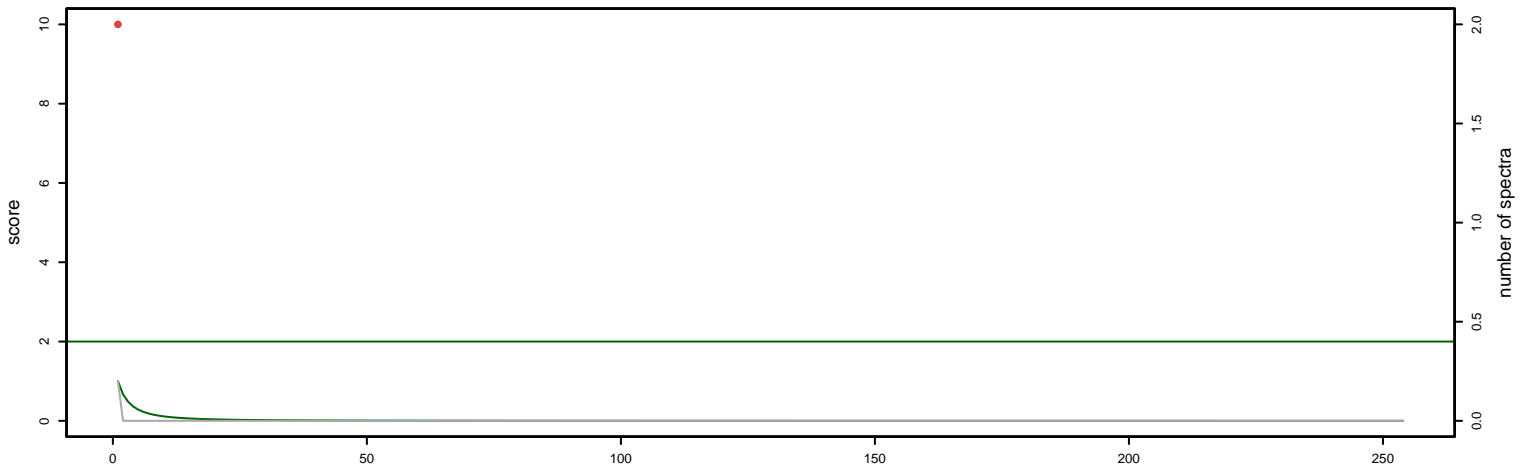

## replica

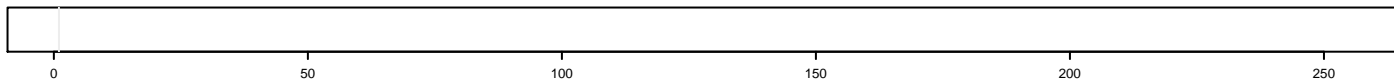

## stability

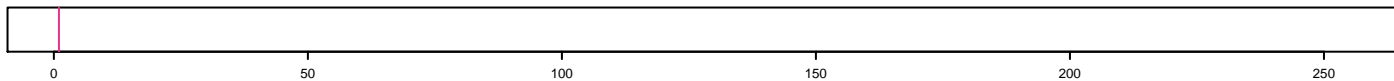

# Serpin B9 (P50453)

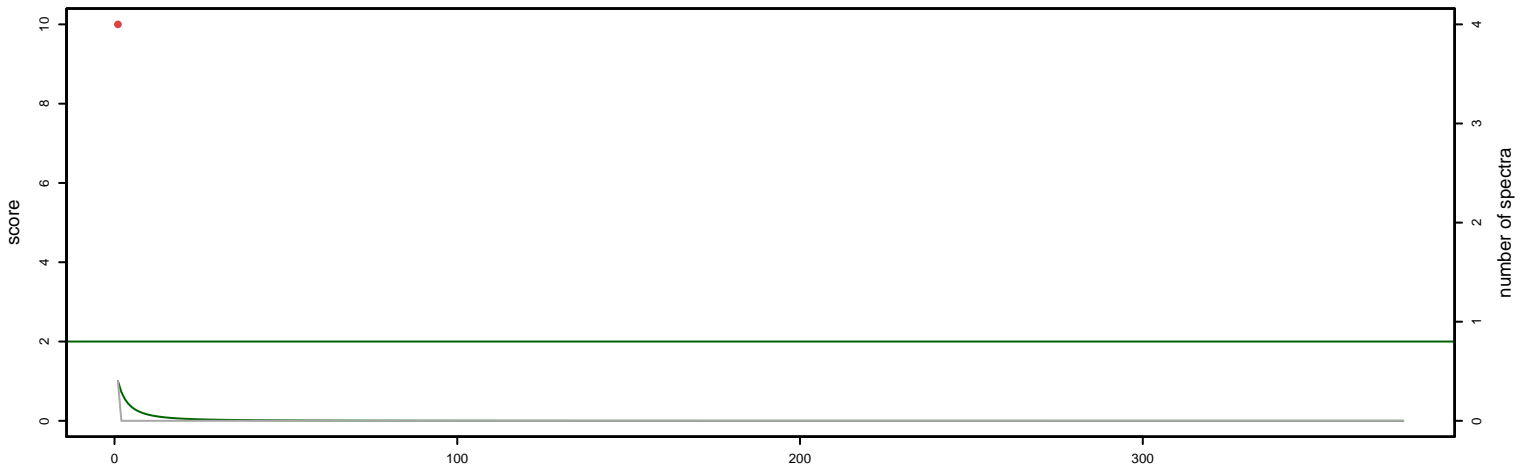

replica

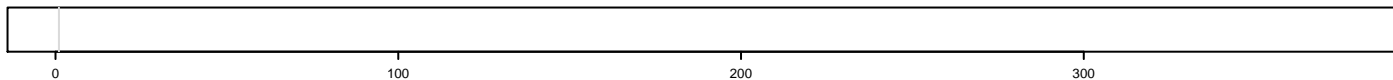

stability

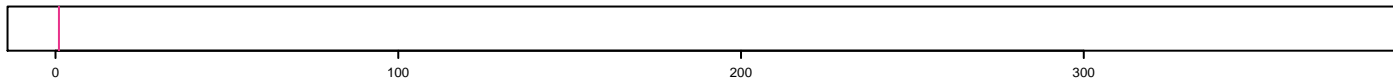

### T-complex protein 1 subunit theta (P50990)

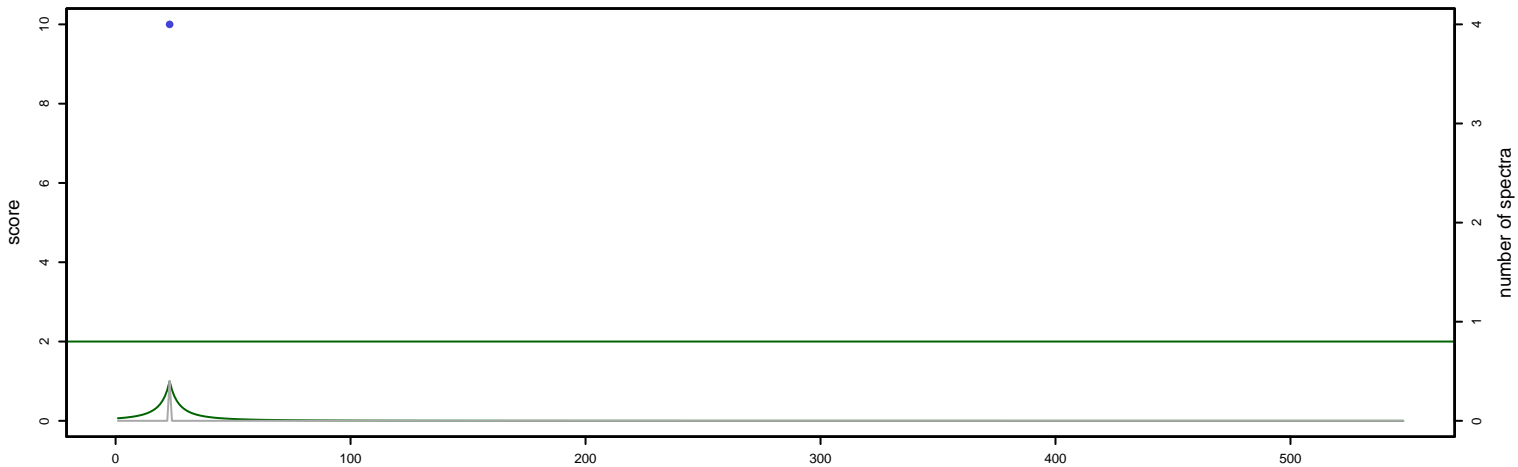

replica

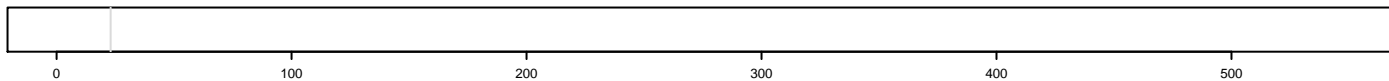

stability

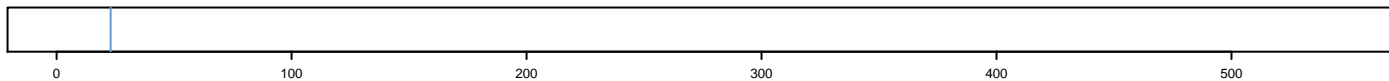

# Host cell factor 1 (P51610)

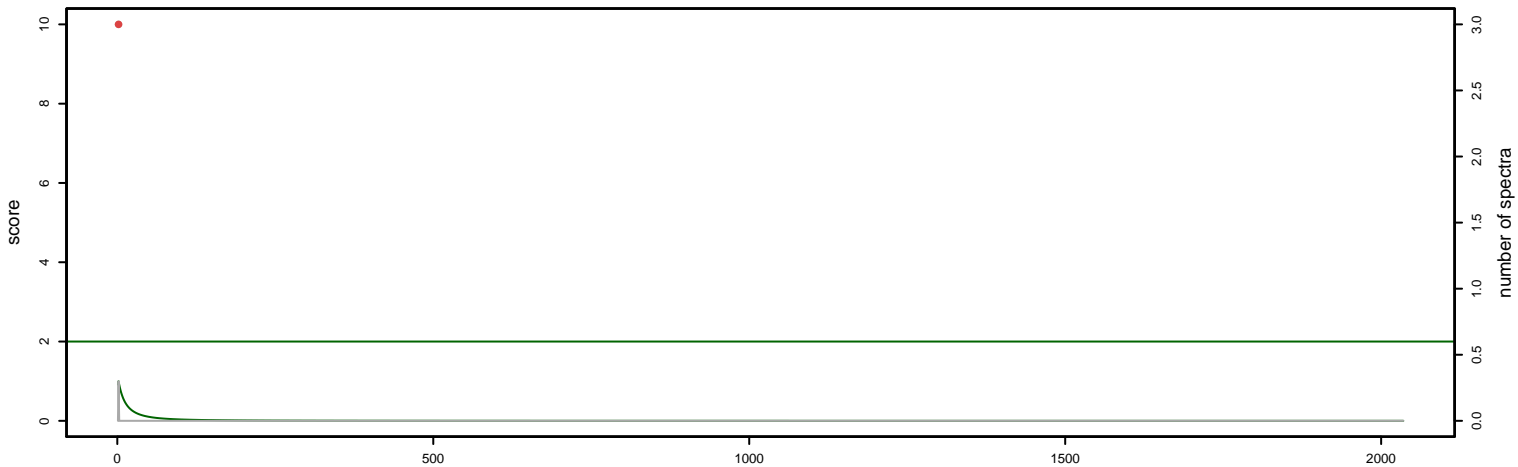

## replica

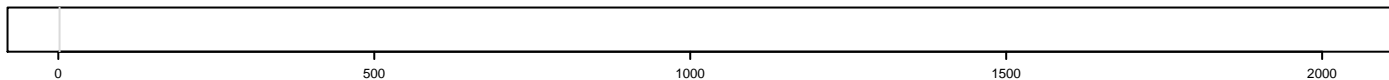

## stability

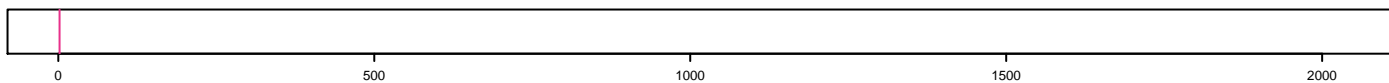

# Ubiquitin carboxyl-terminal hydrolase 11 (P51784)

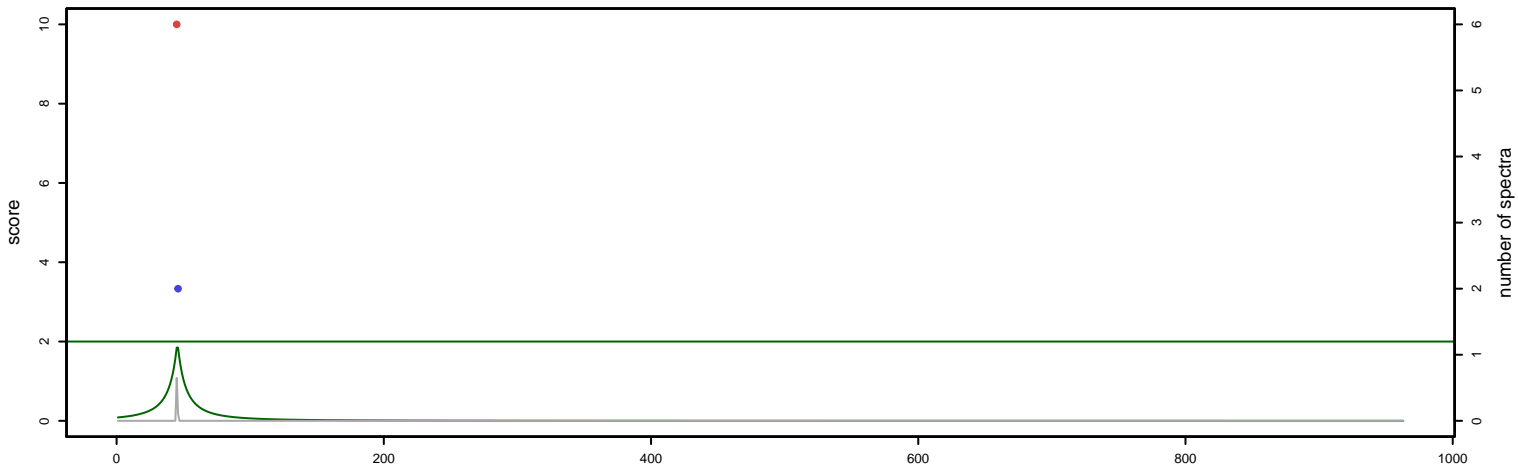

replica

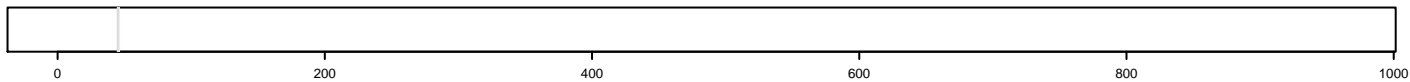

stability

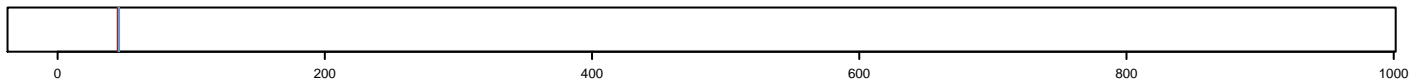

# Ribosomal protein S6 kinase alpha-3 (P51812)

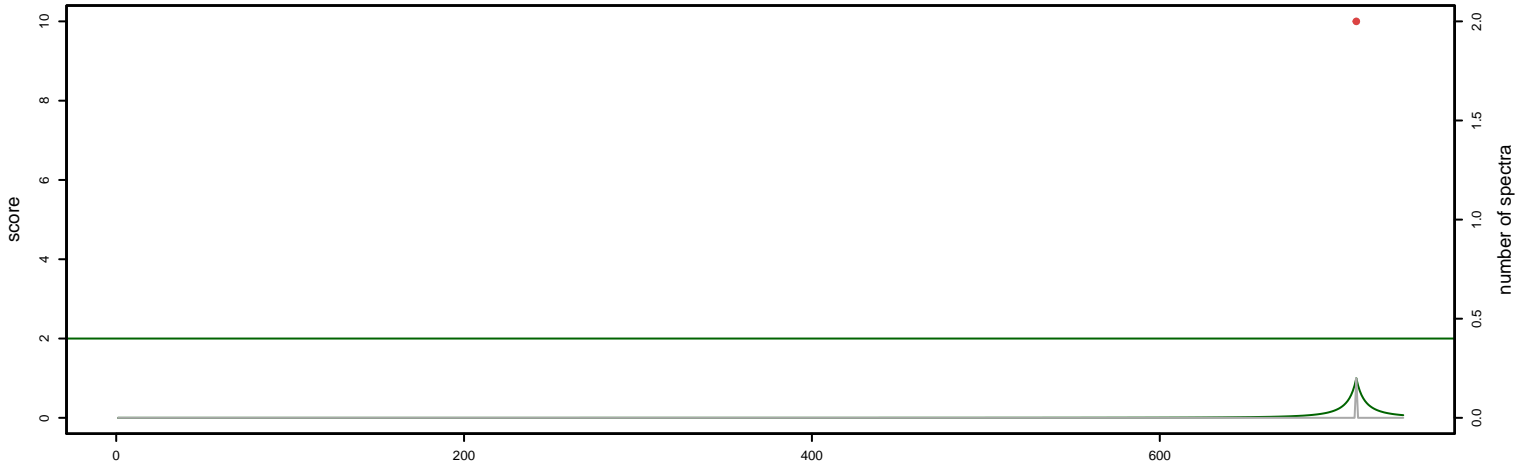

replica

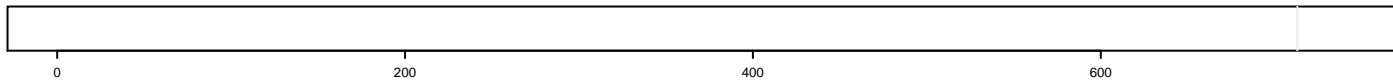

stability

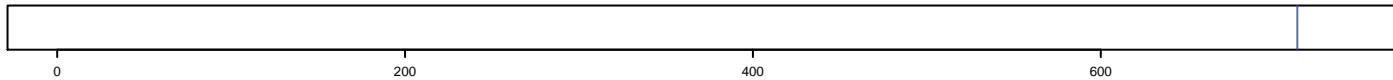

# Heterogeneous nuclear ribonucleoprotein A3 (P51991)

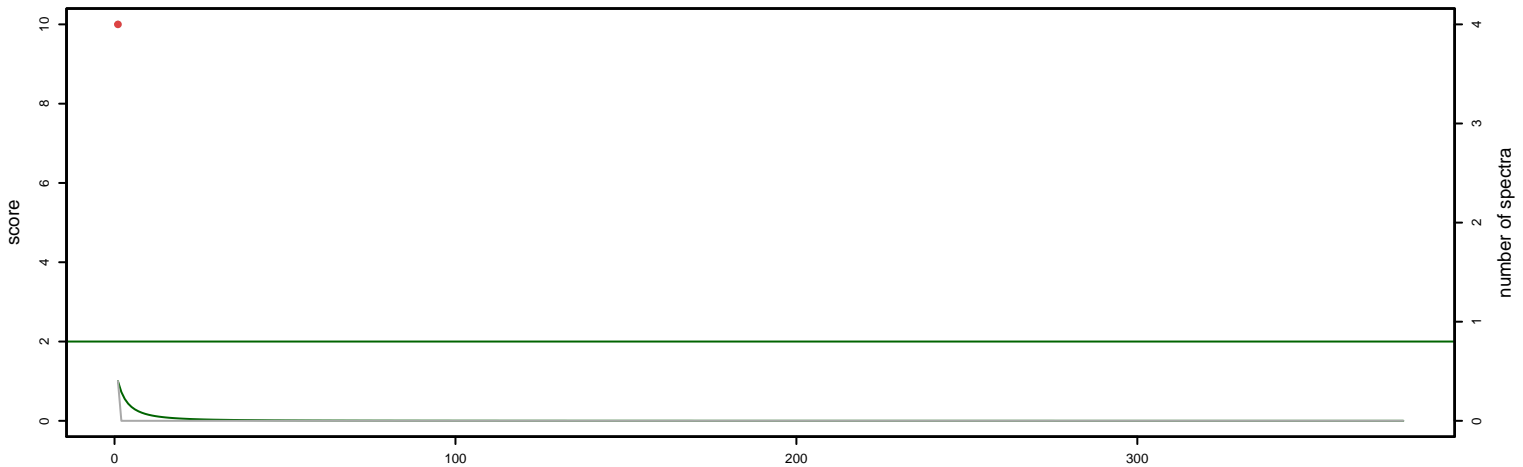

replica

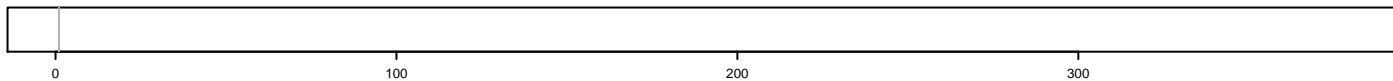

stability

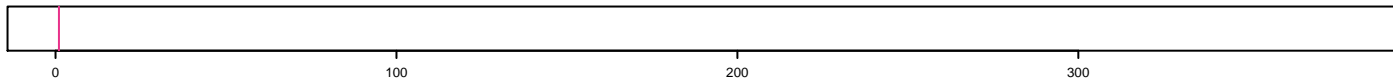



# Importin subunit alpha-1 (P52294)

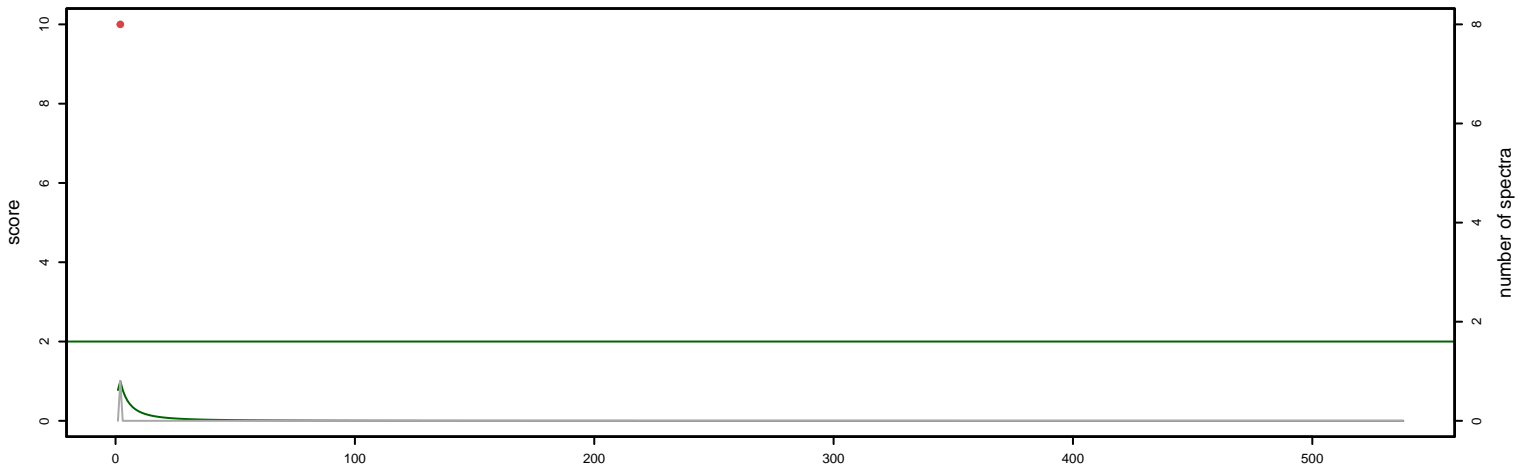

replica

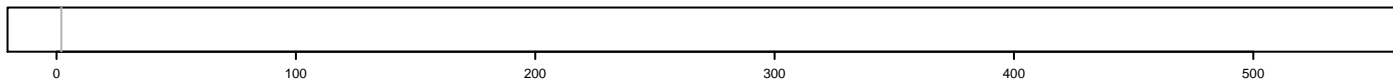

stability

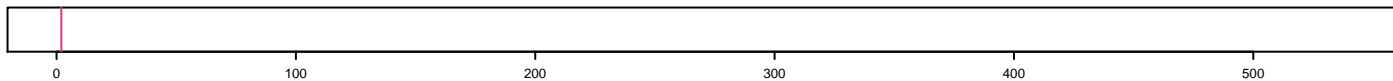

# Rho GDP-dissociation inhibitor 1 (P52565)

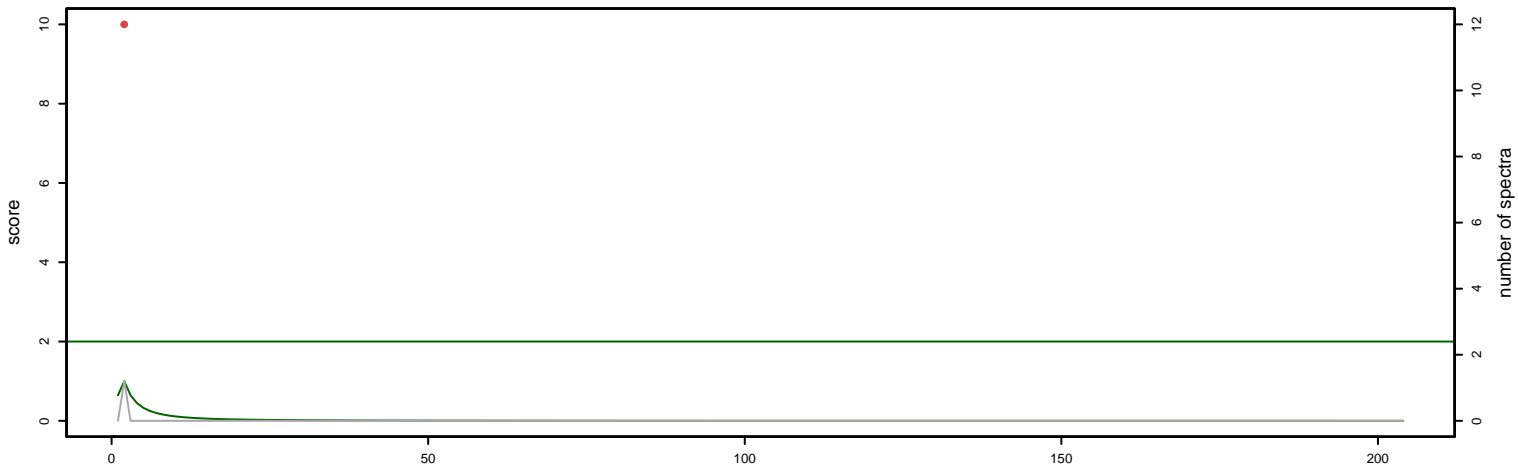

replica

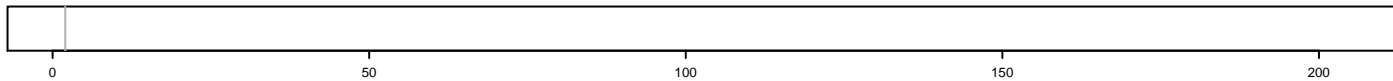

stability

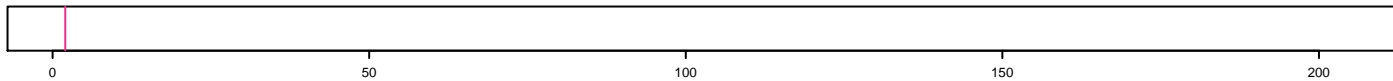

# Heterogeneous nuclear ribonucleoprotein F (P52597)

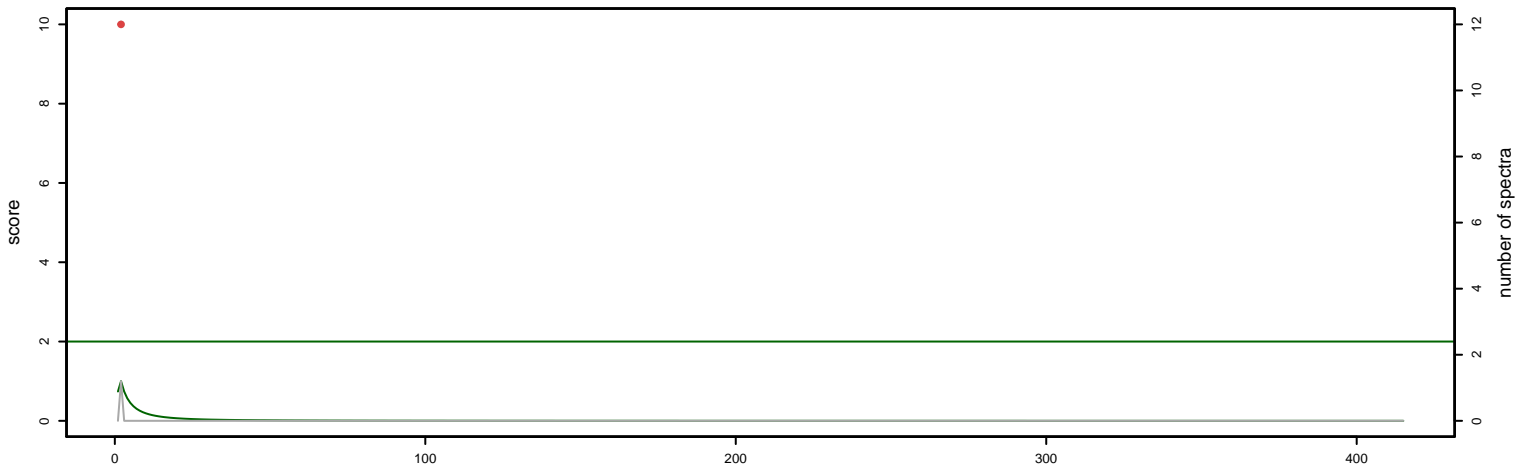

replica

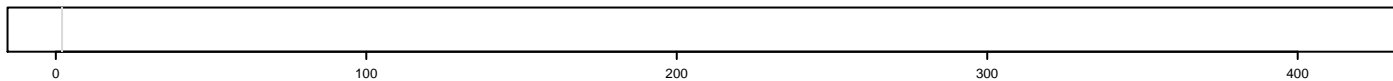

stability

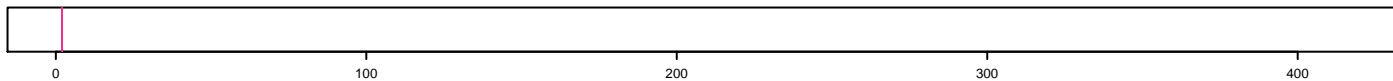

### Thimet oligopeptidase (P52888)

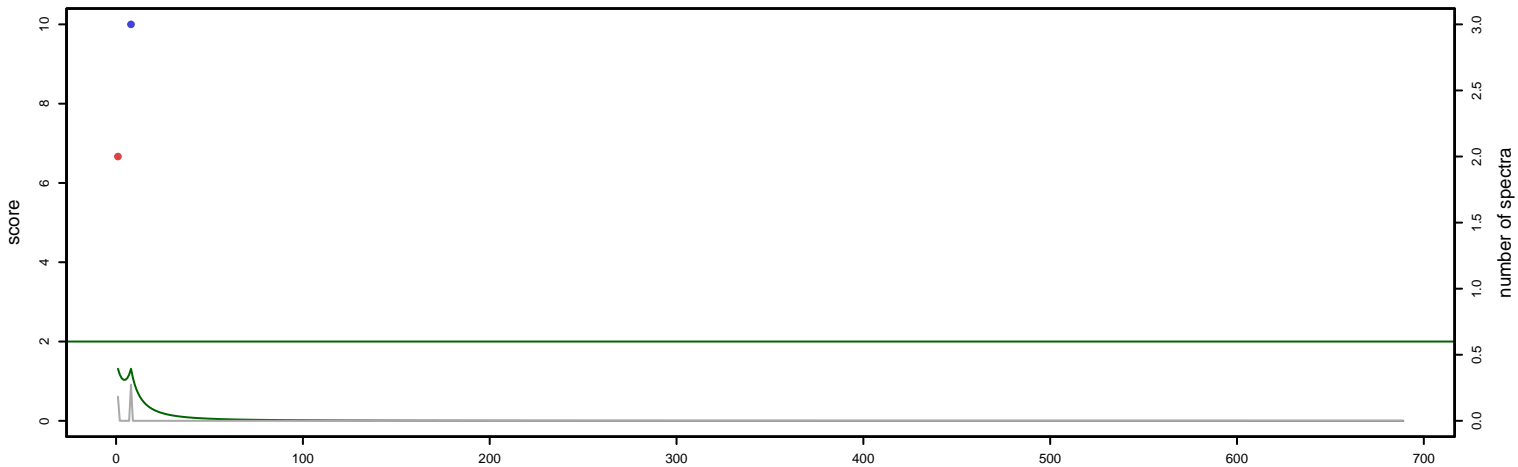

replica

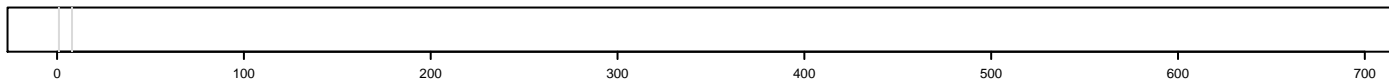

stability

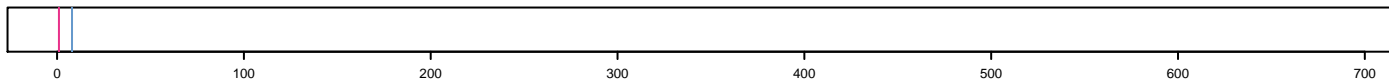

# F-actin-capping protein subunit alpha-1 (P52907)

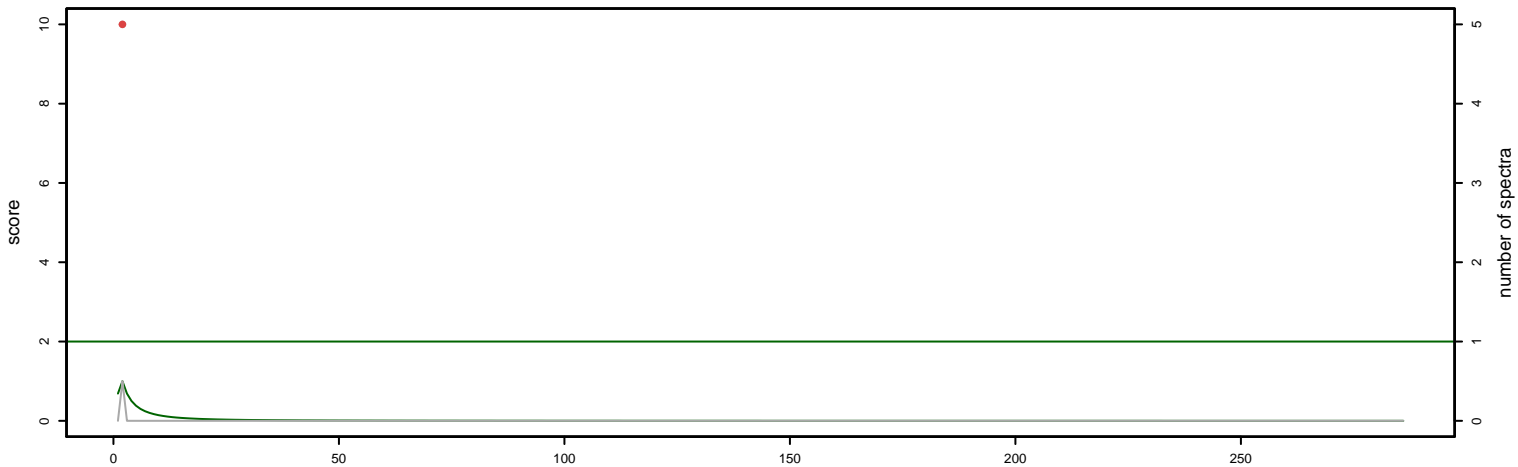

replica

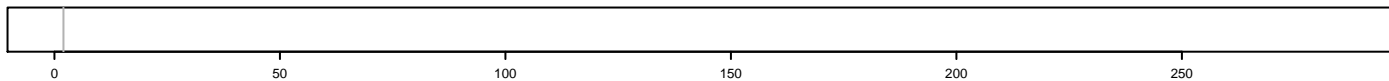

stability



### Cytosolic Fe-S cluster assembly factor NUBP1 (P53384)

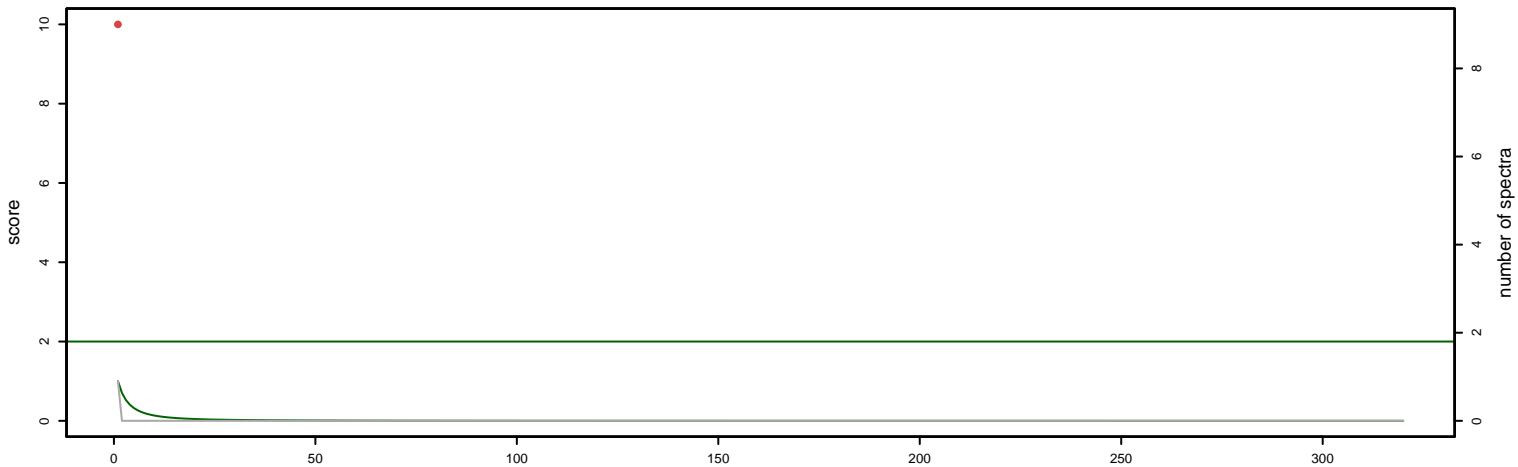

replica

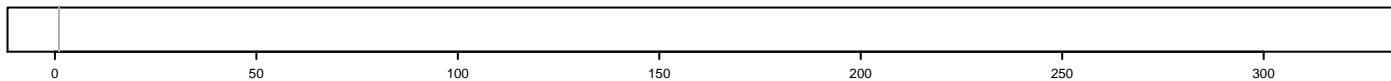

stability

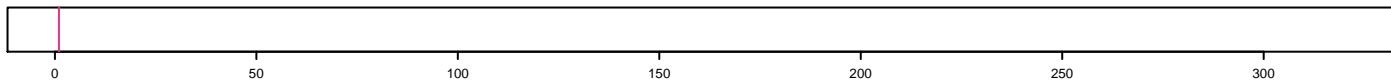

### ATP-citrate synthase (P53396)

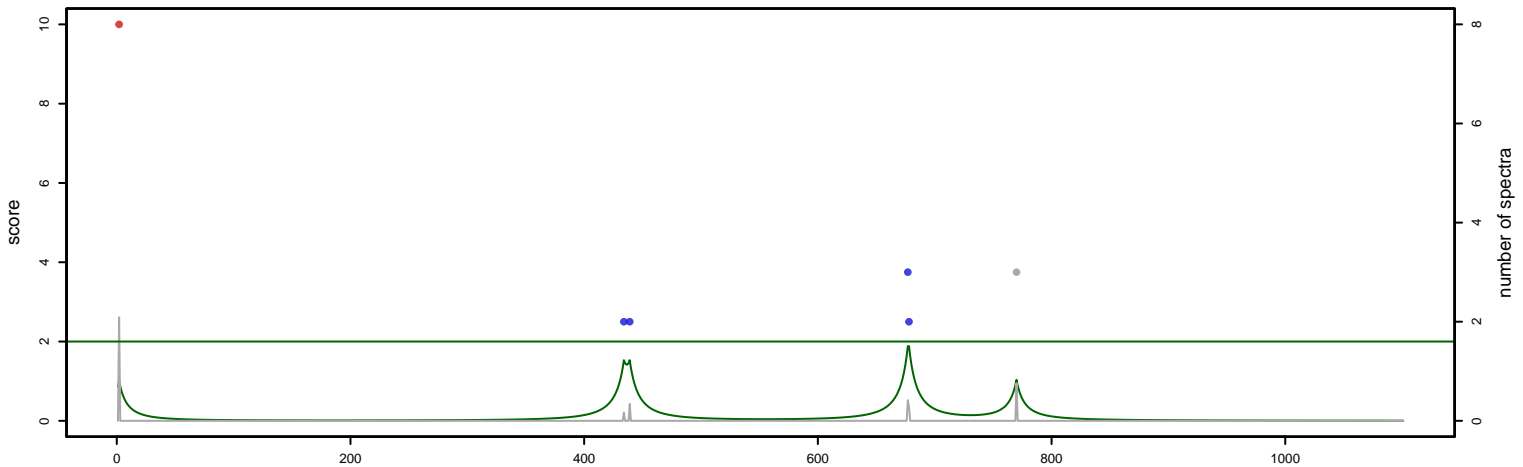

### replica

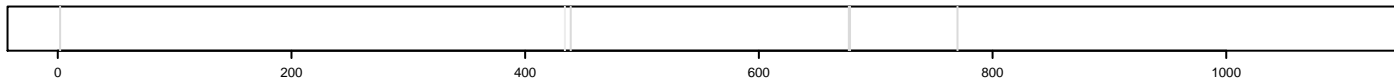

### stability

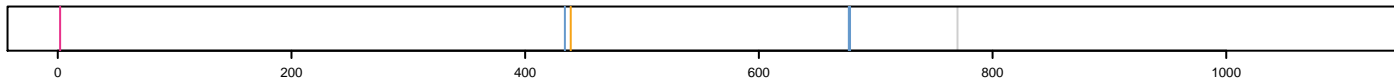

# Geranylgeranyl transferase type-2 subunit beta (P53611)

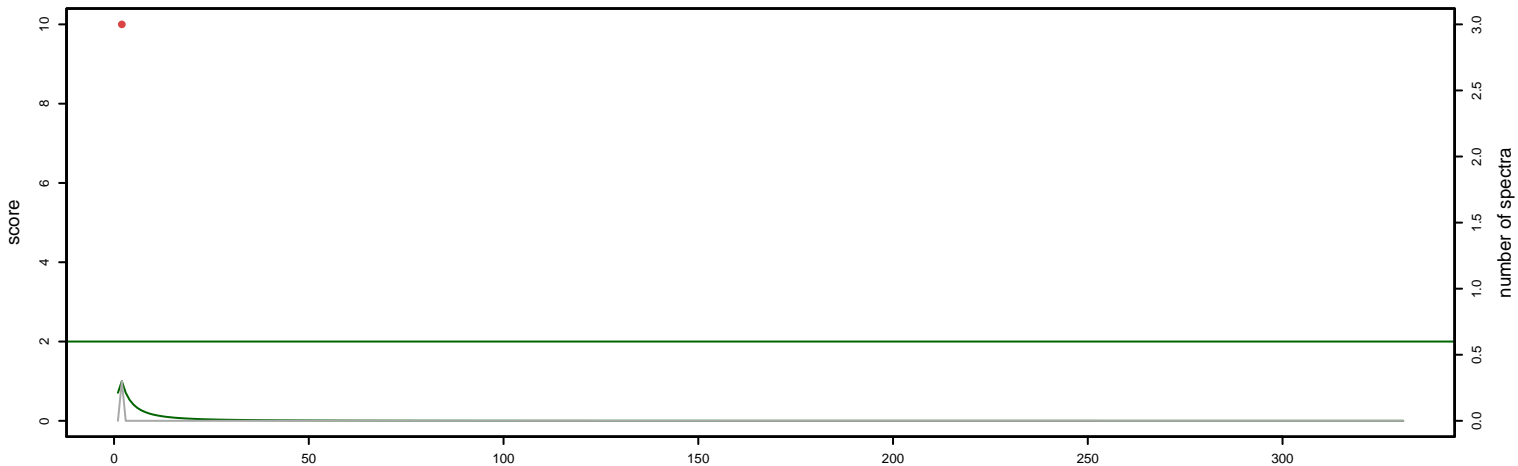

replica

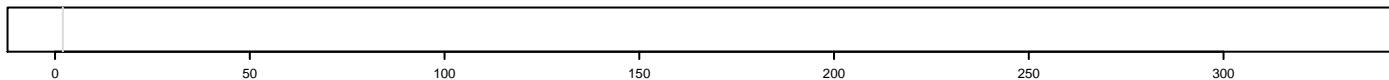

stability

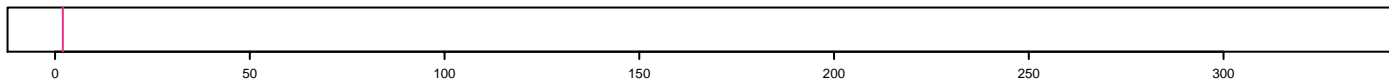



# IST1 homolog (P53990)

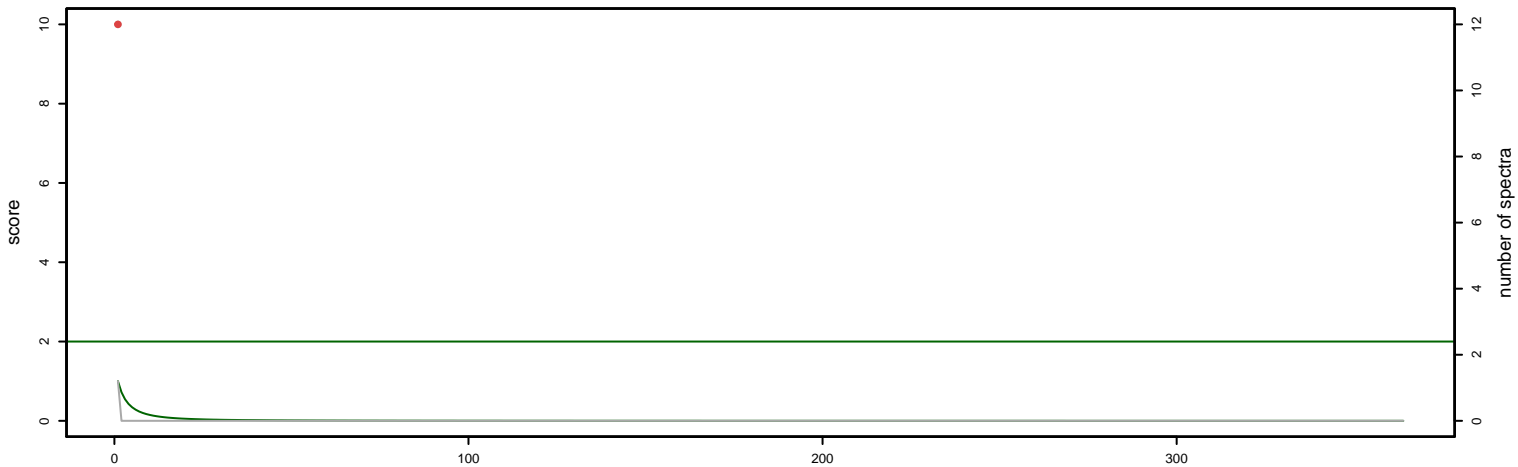

replica

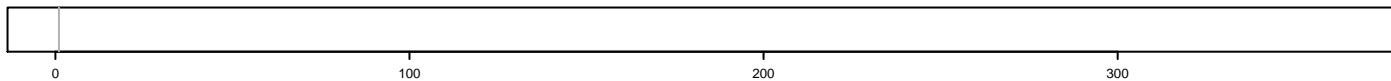

stability

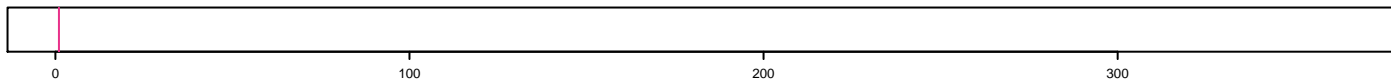

# Methylosome subunit pICln (P54105)

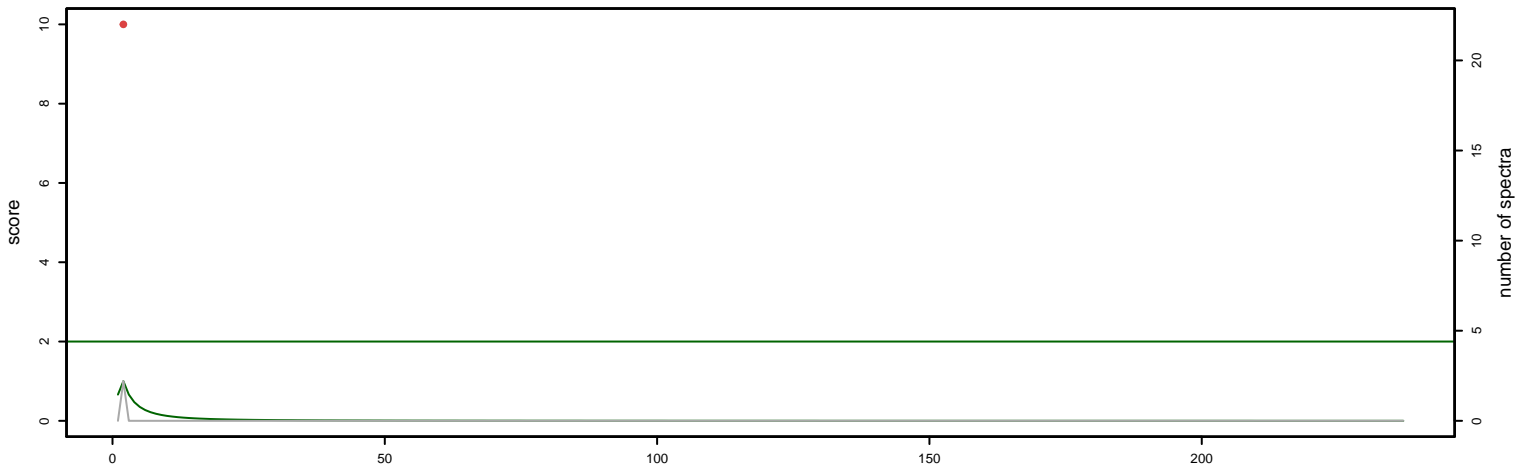

replica

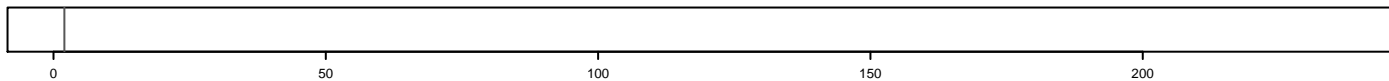

stability

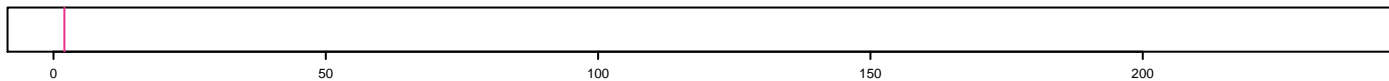

# Tyrosine--tRNA ligase, cytoplasmic (P54577)

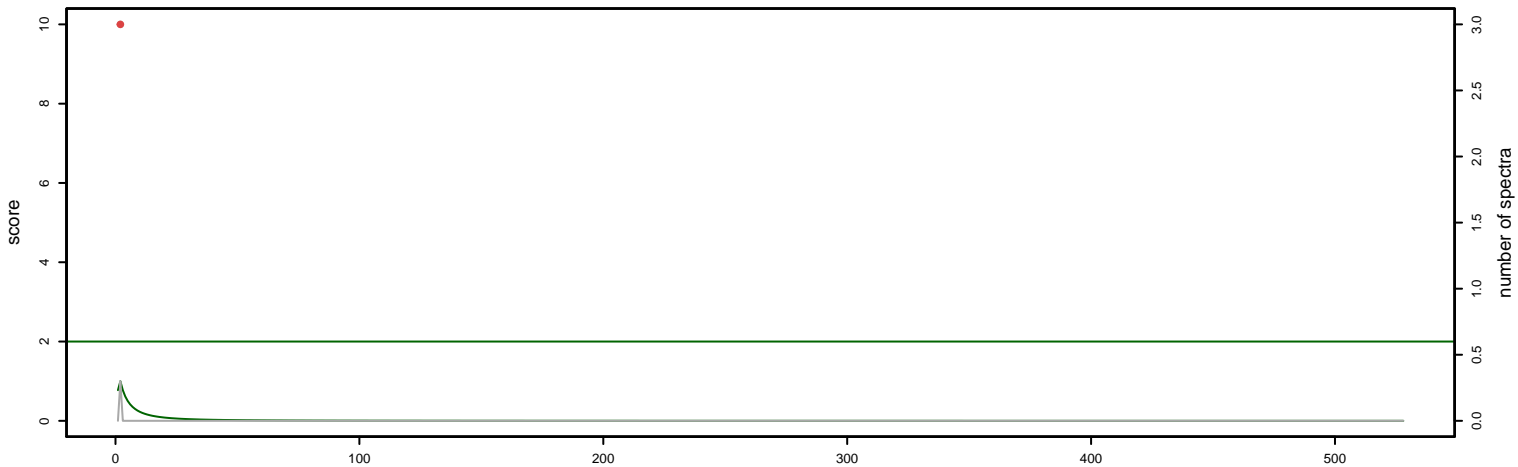

replica

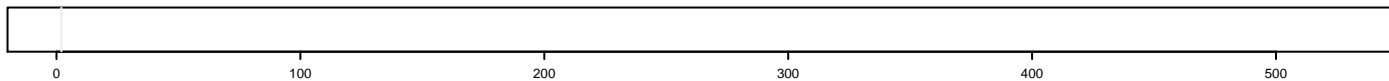

stability

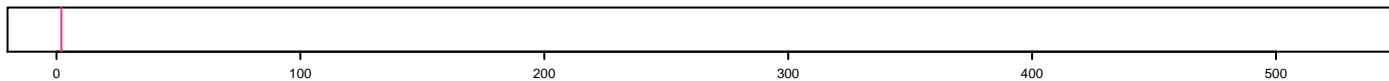

# Ubiquitin carboxyl-terminal hydrolase 14 (P54578)

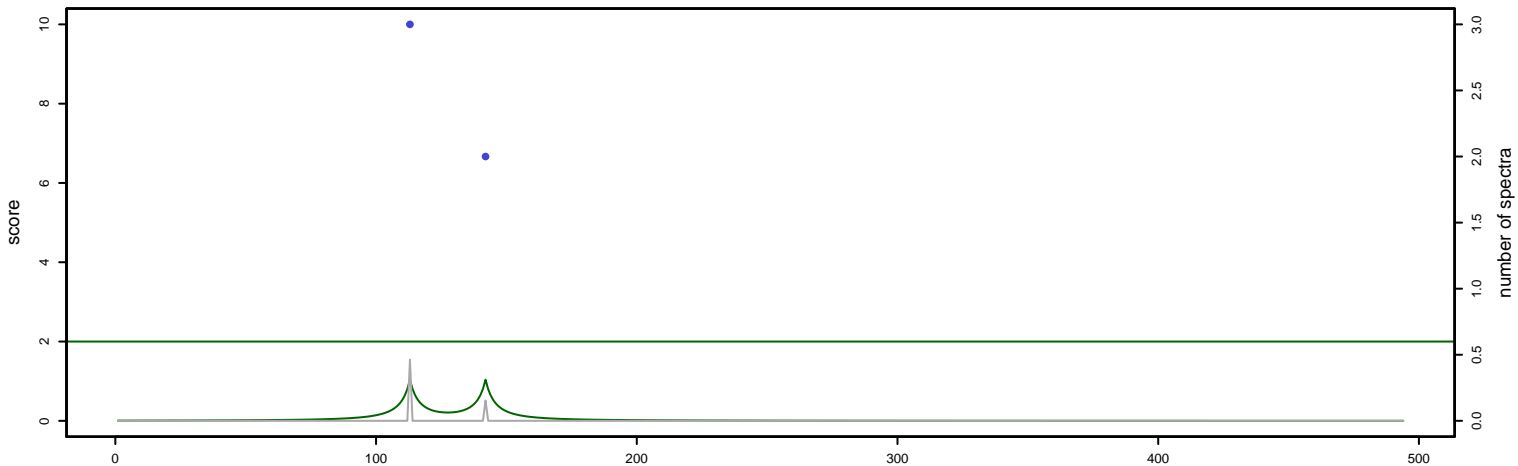

replica

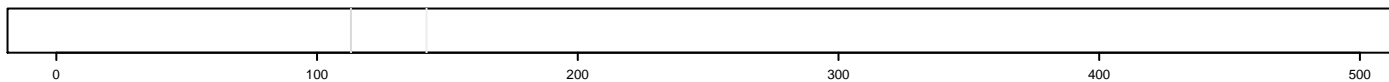

stability

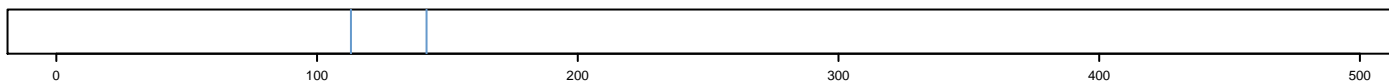

# UV excision repair protein RAD23 homolog A (P54725)

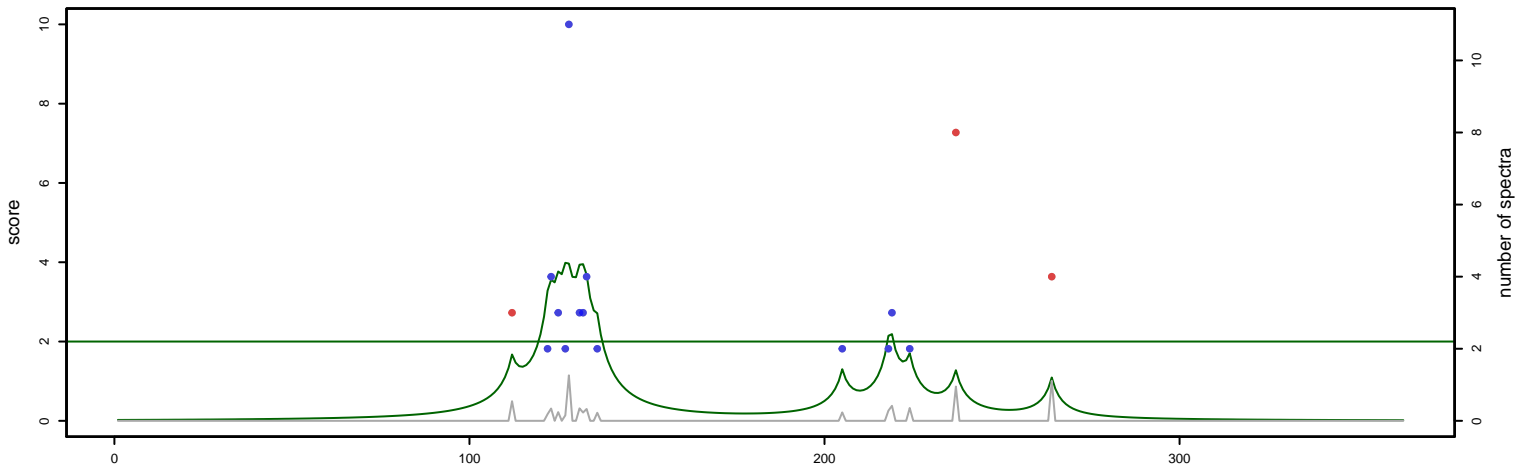

replica

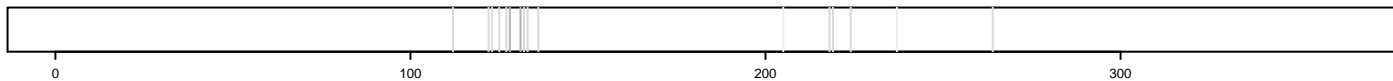

stability

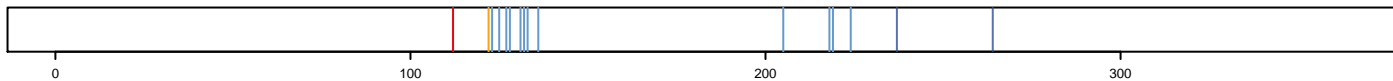

# UV excision repair protein RAD23 homolog B (P54727)

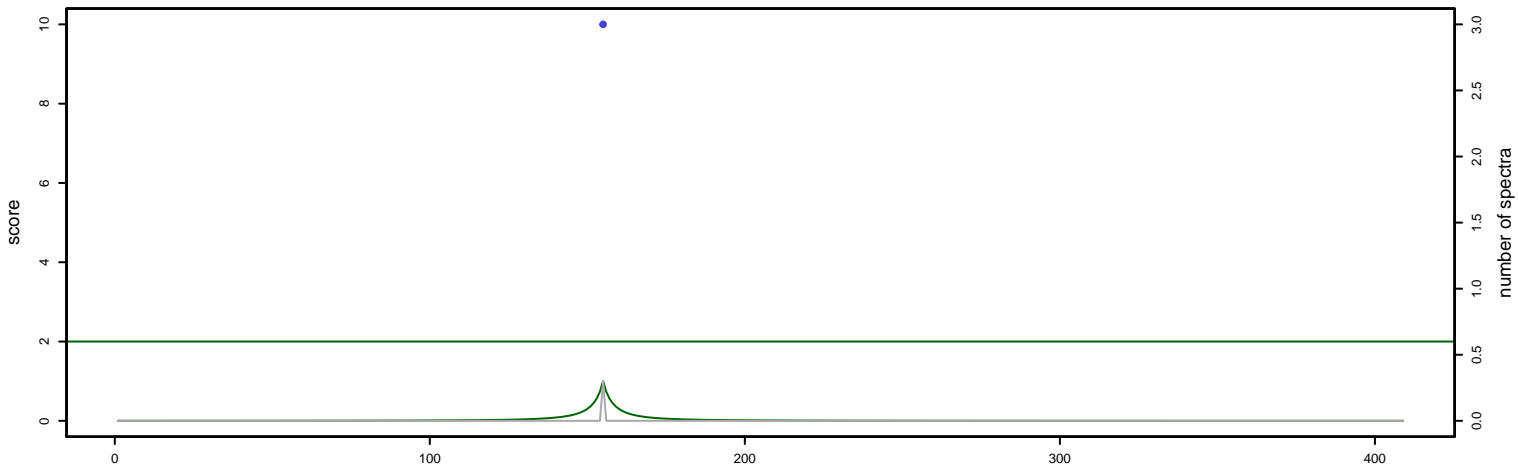

replica

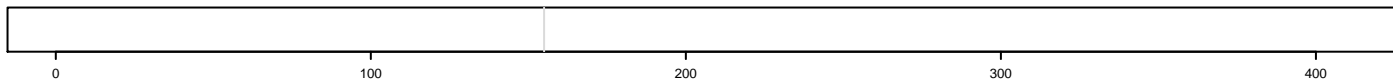

stability

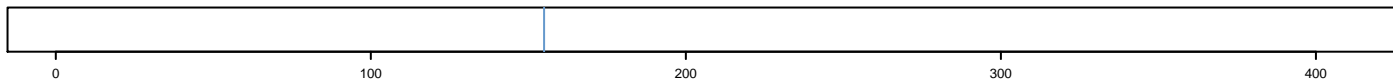

# Alpha-soluble NSF attachment protein (P54920)

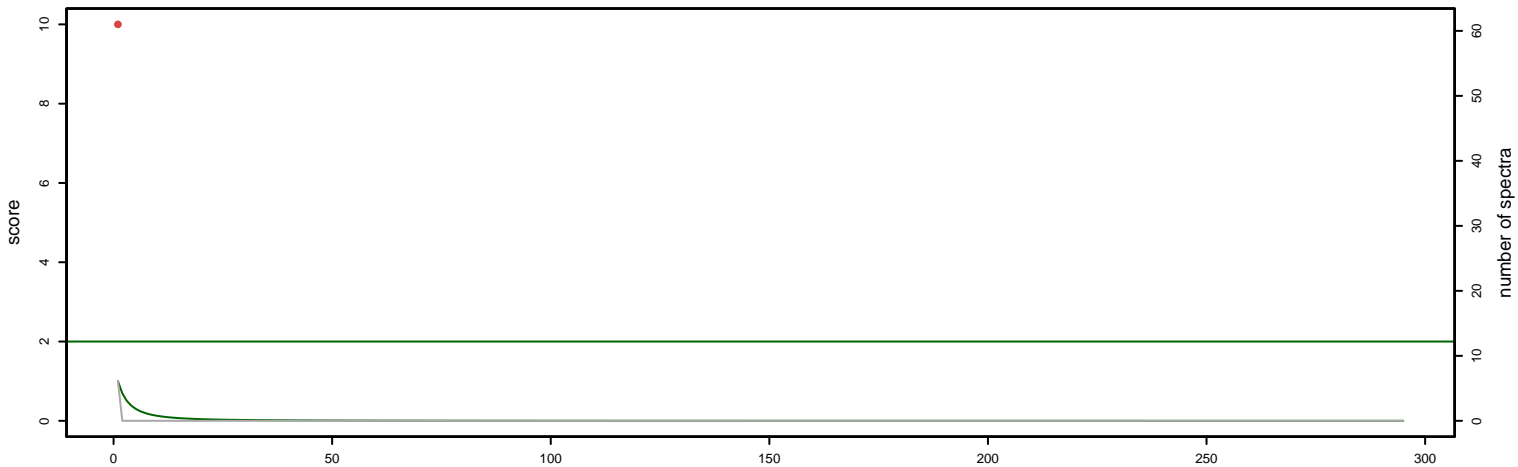

replica

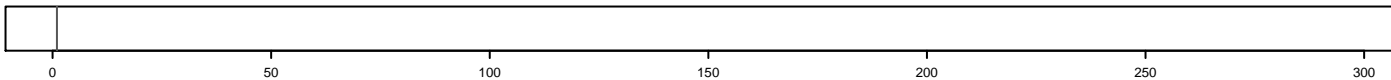

stability

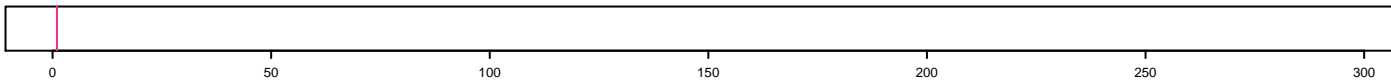

### 26S proteasome non-ATPase regulatory subunit 4 (P55036)

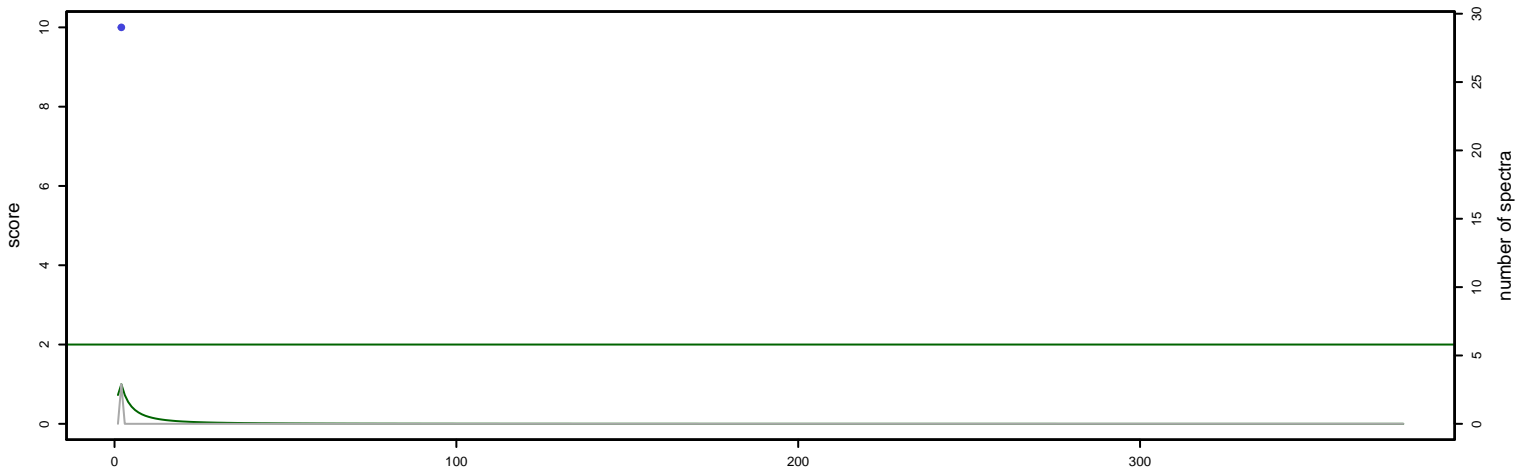

replica

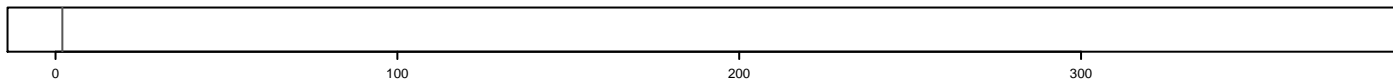

stability

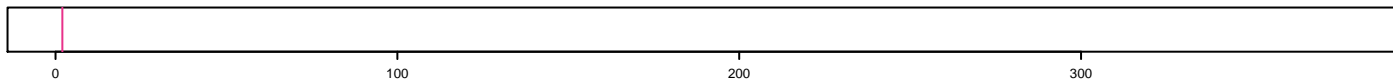



### Transitional endoplasmic reticulum ATPase (P55072)

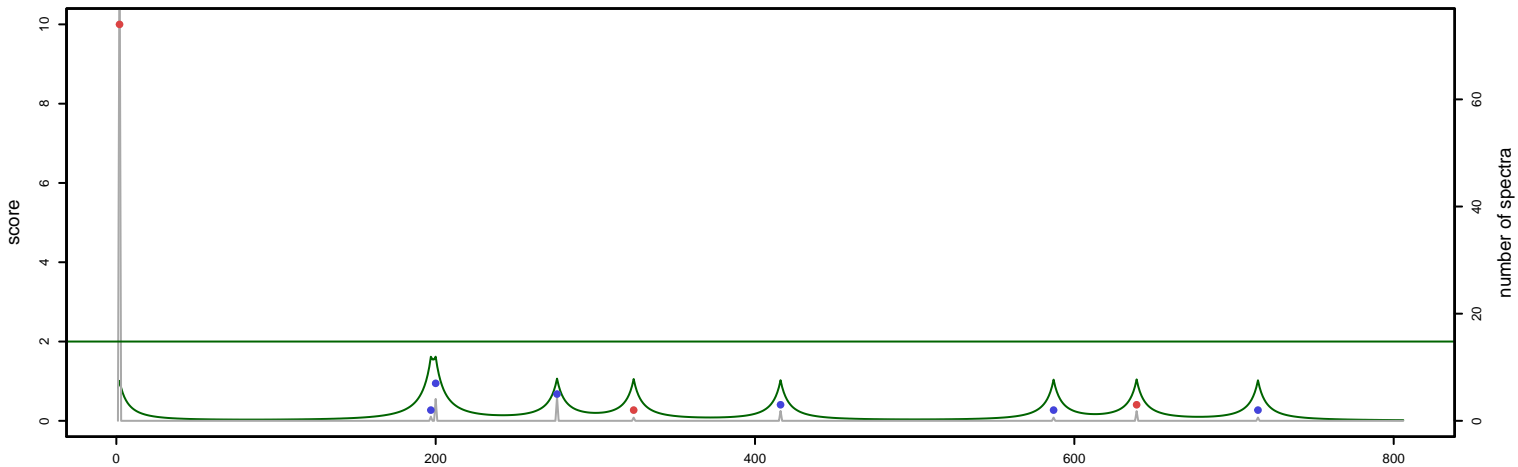

replica

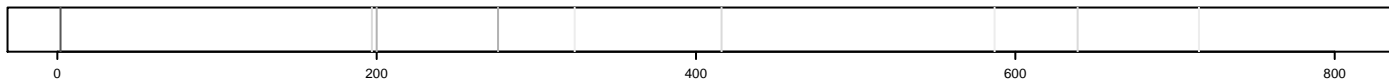

stability

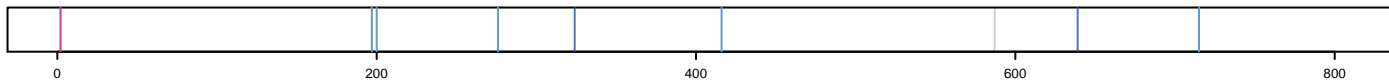

# Nucleosome assembly protein 1-like 1 (P55209)

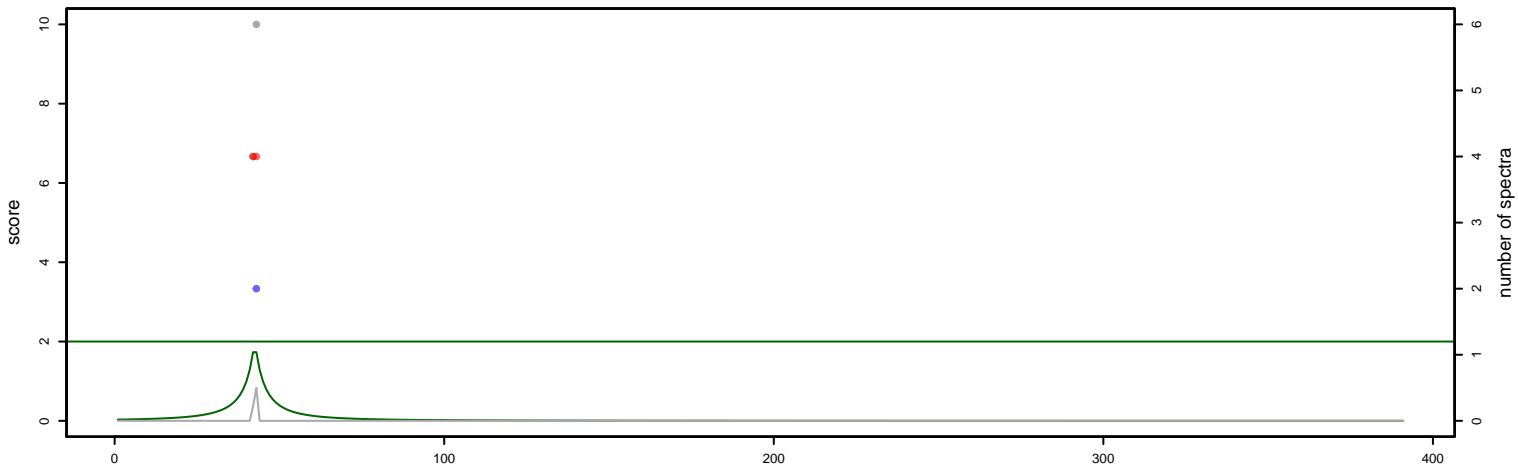

replica

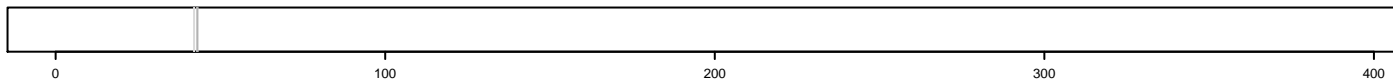

stability

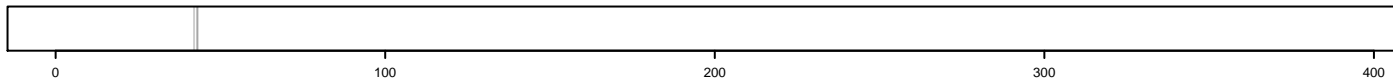

# Protein SEC13 homolog (P55735)

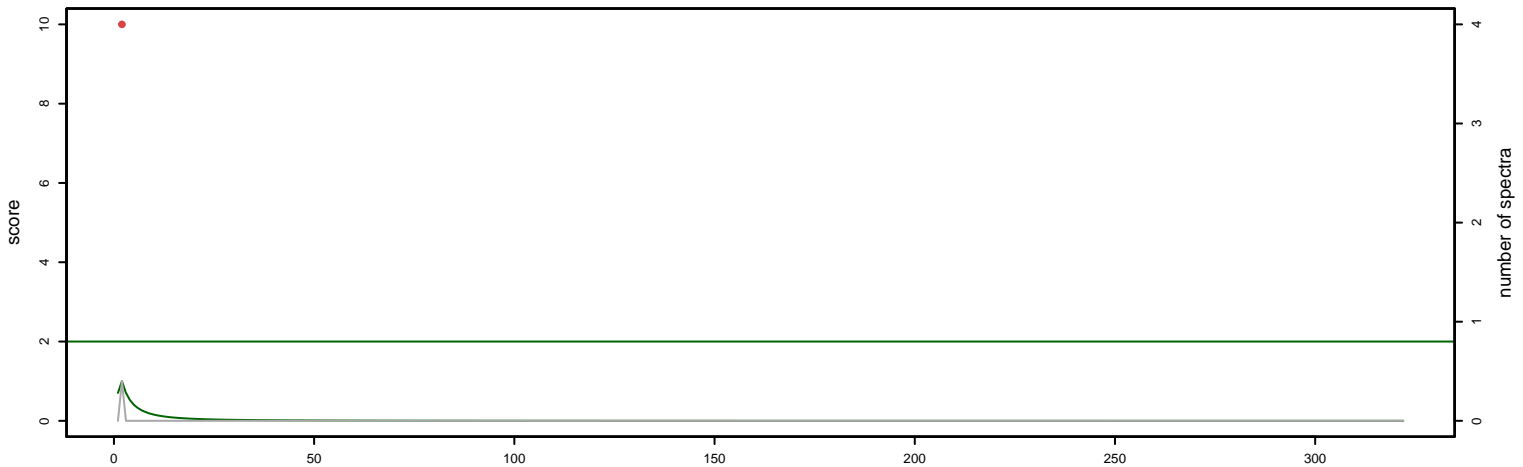

replica

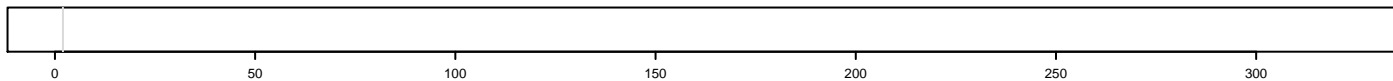

stability

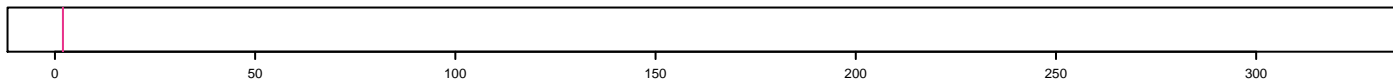

### BH3-interacting domain death agonist (P55957)

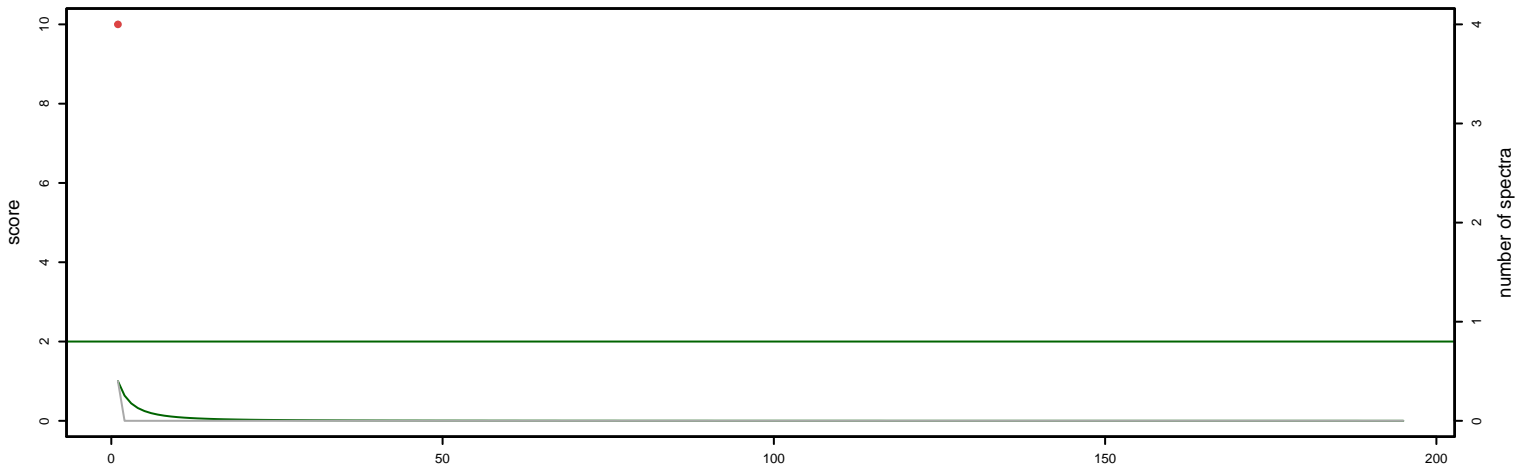

replica

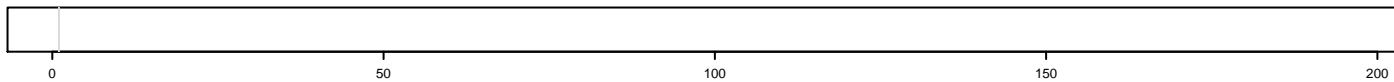

stability

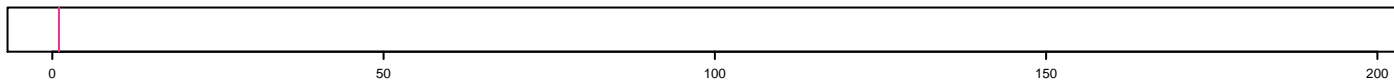

### Eukaryotic translation initiation factor 6 (P56537)

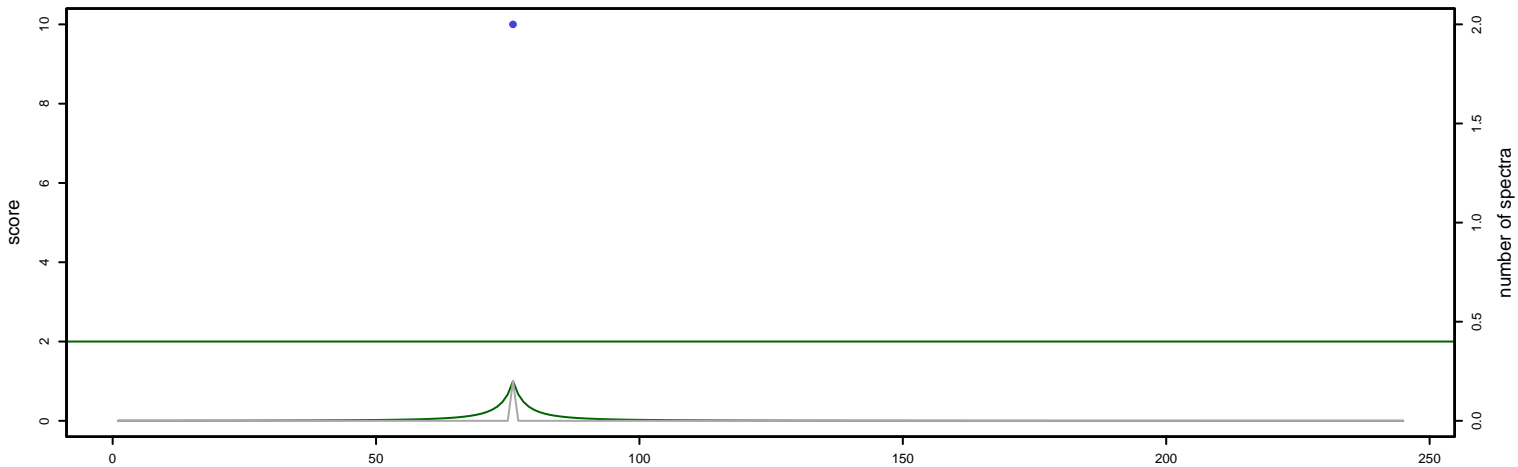

replica

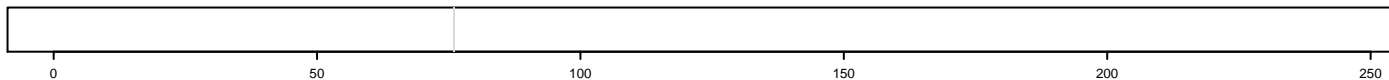

stability

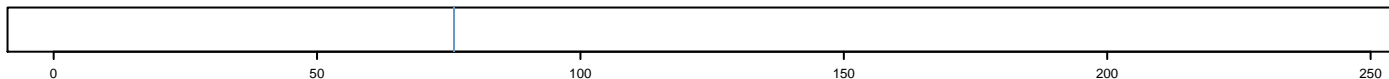

# Transmembrane protein 50B (P56557)

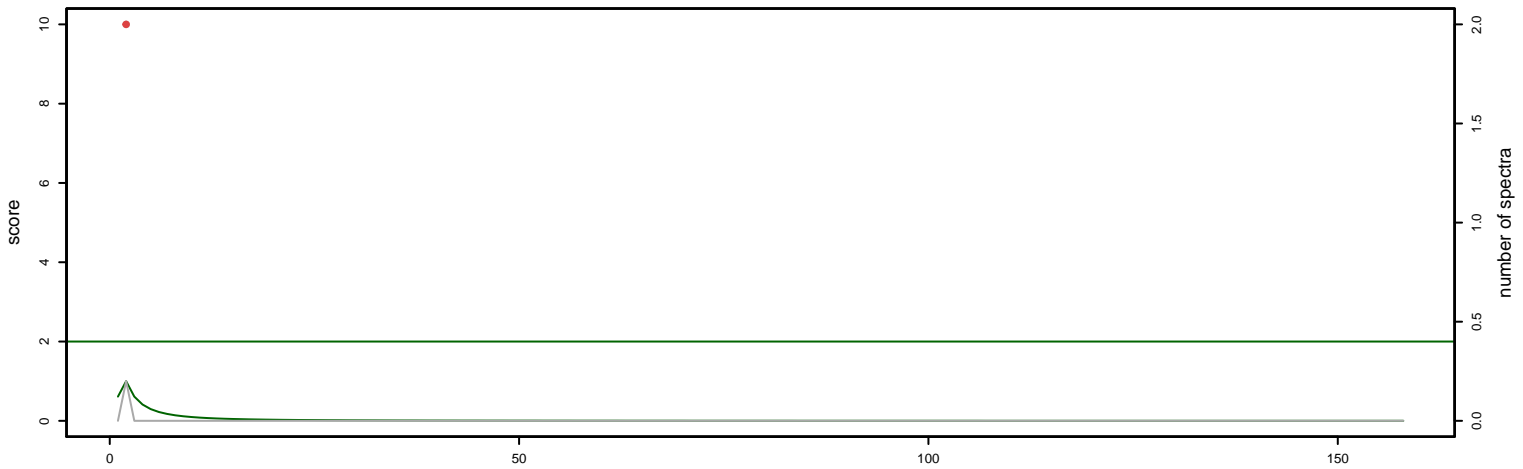

replica

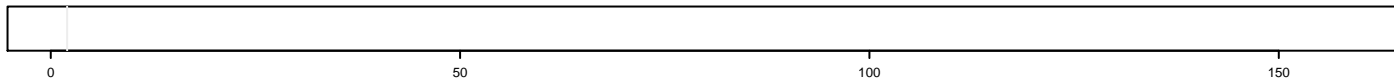

stability

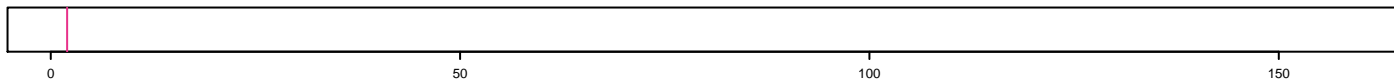

# PR domain zinc finger protein 15 (P57071)

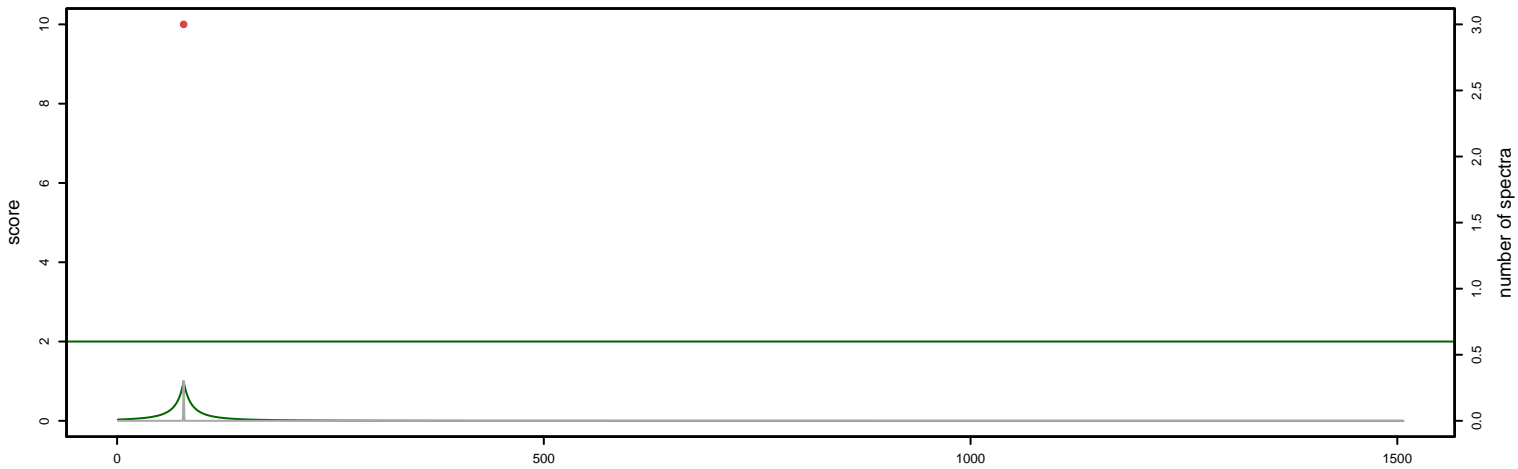

replica

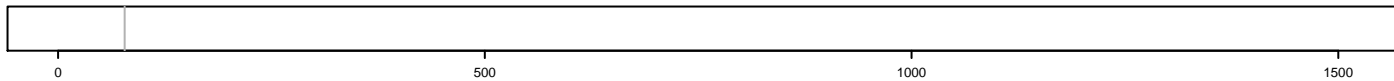

stability

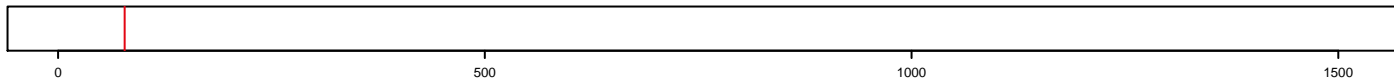

### Coronin-7 (P57737)

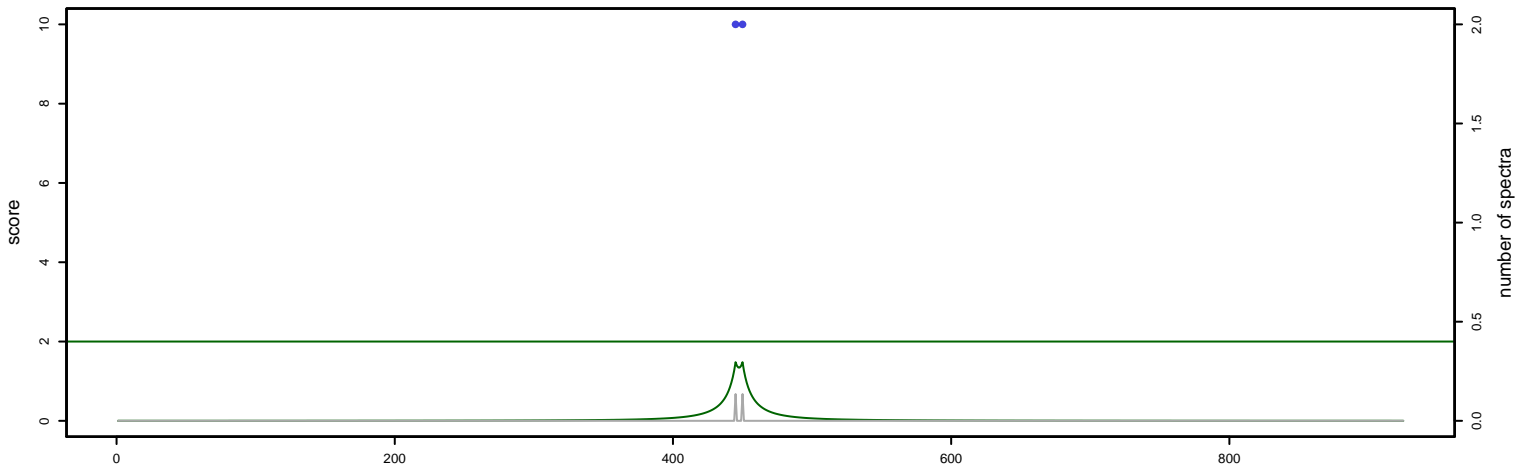

replica

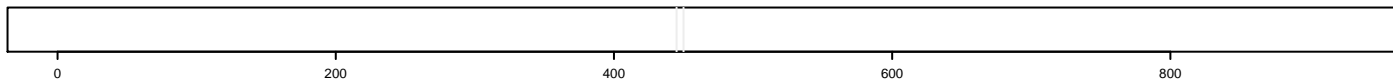

stability

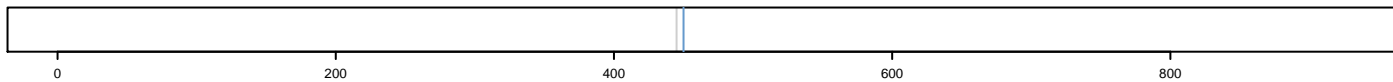



# Myotrophin (P58546)

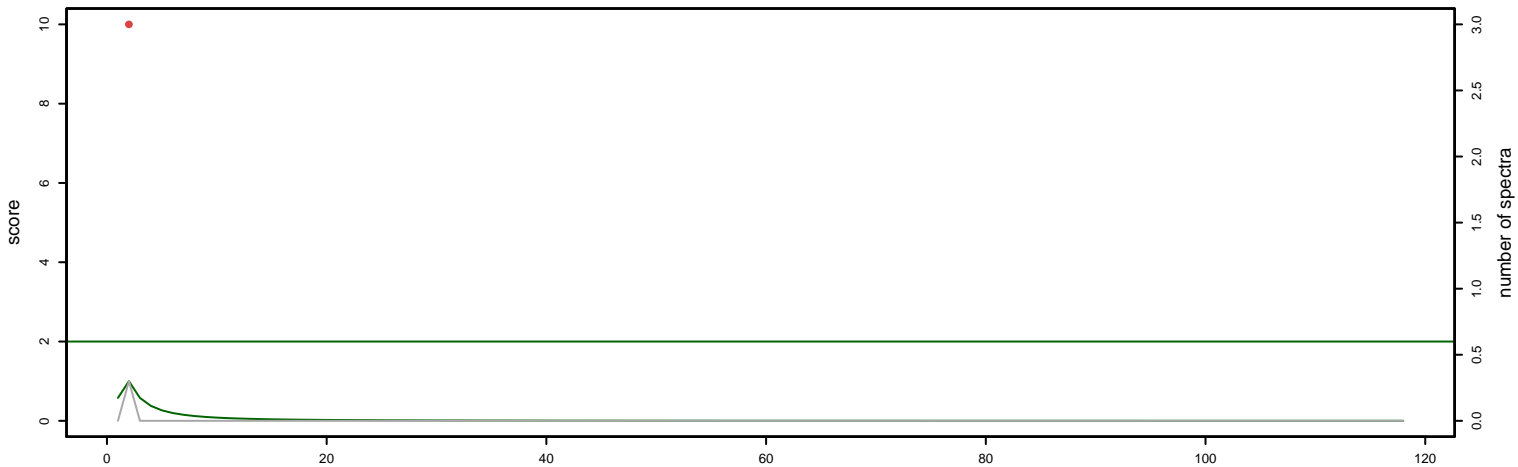

## replica

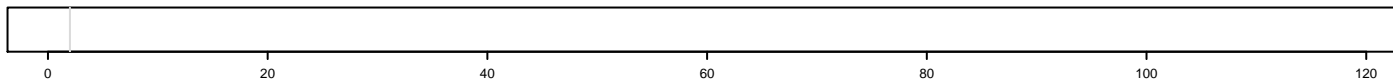

## stability

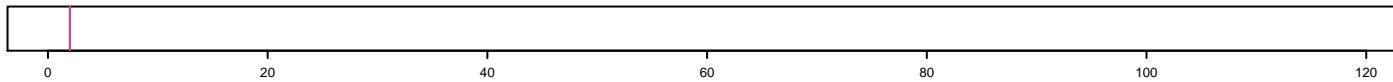

### Guanine nucleotide-binding protein G(I)/G(S)/G(O) subunit gamma-2 (P59768)

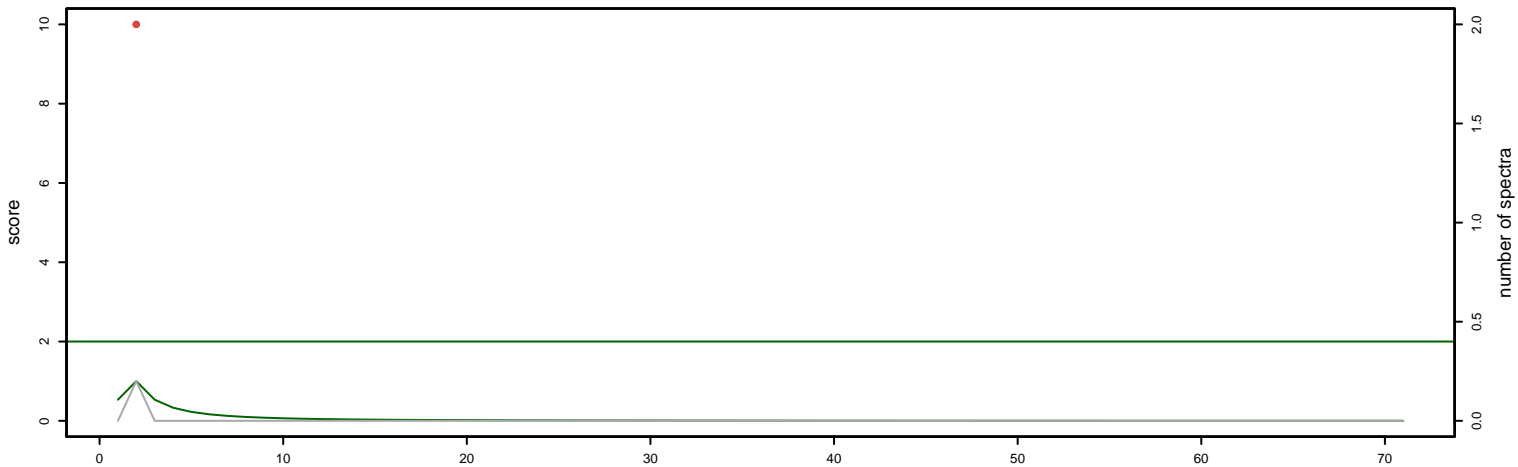

replica

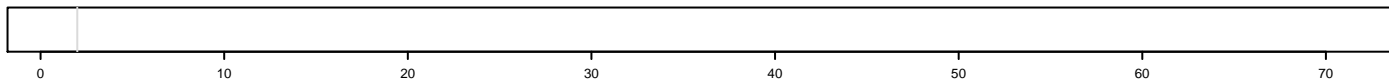

stability

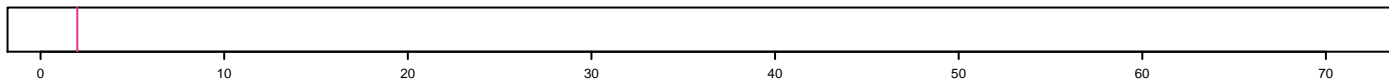

# Triosephosphate isomerase (P60174)

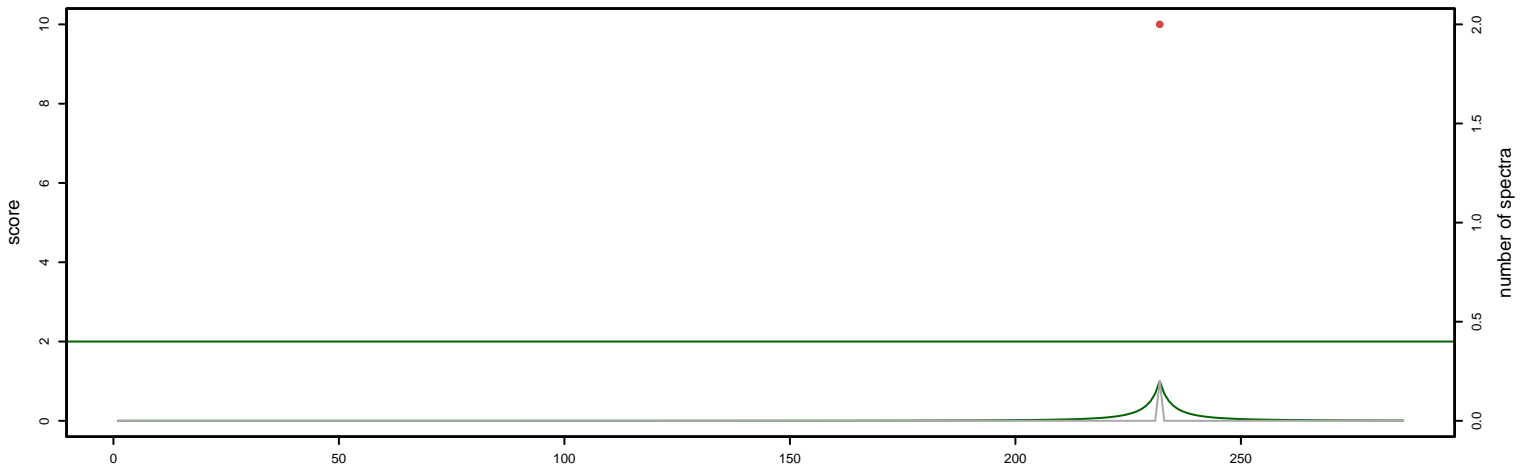

replica

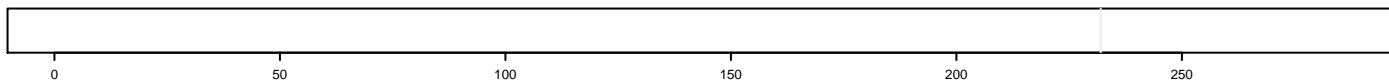

stability

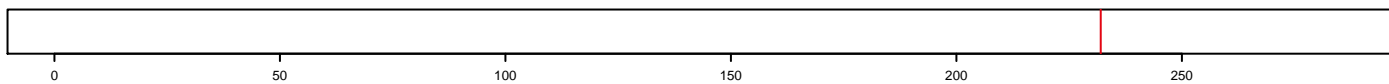

### 40S ribosomal protein S20 (P60866)

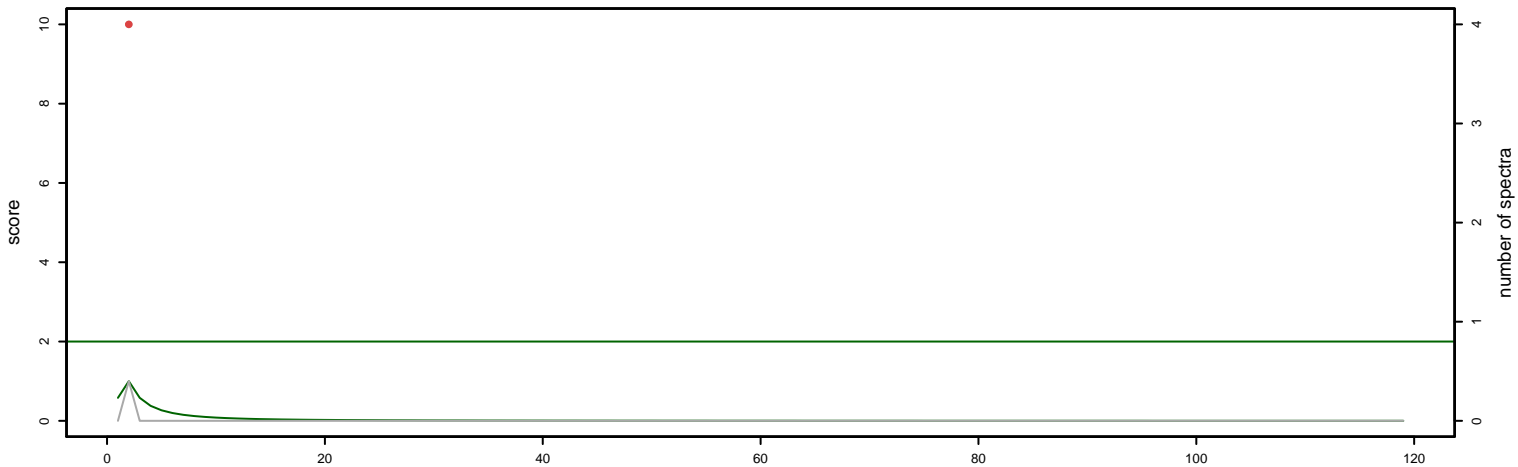

replica

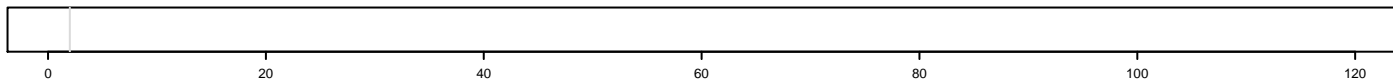

stability

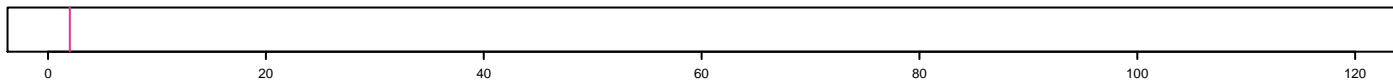

# Ribose-phosphate pyrophosphokinase 1 (P60891)

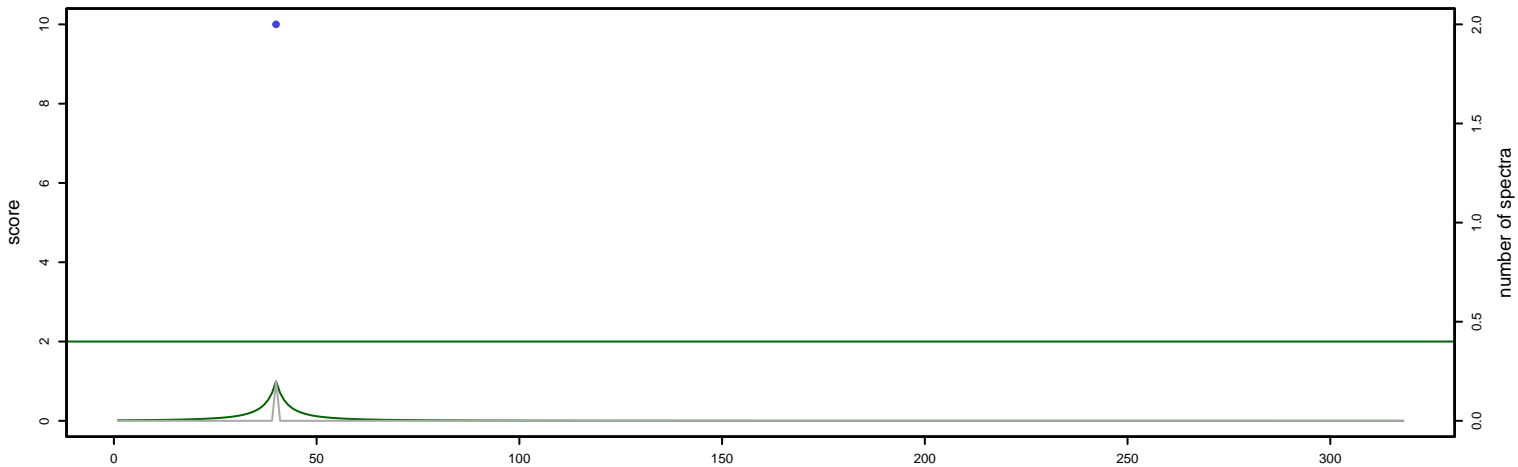

replica

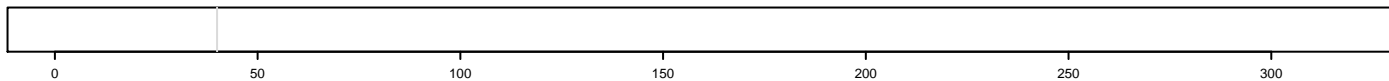

stability

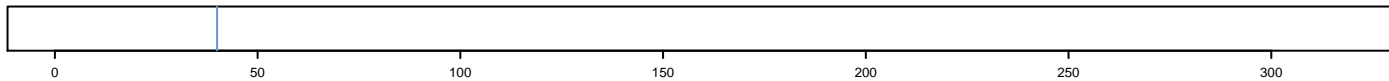

# Destrin (P60981)

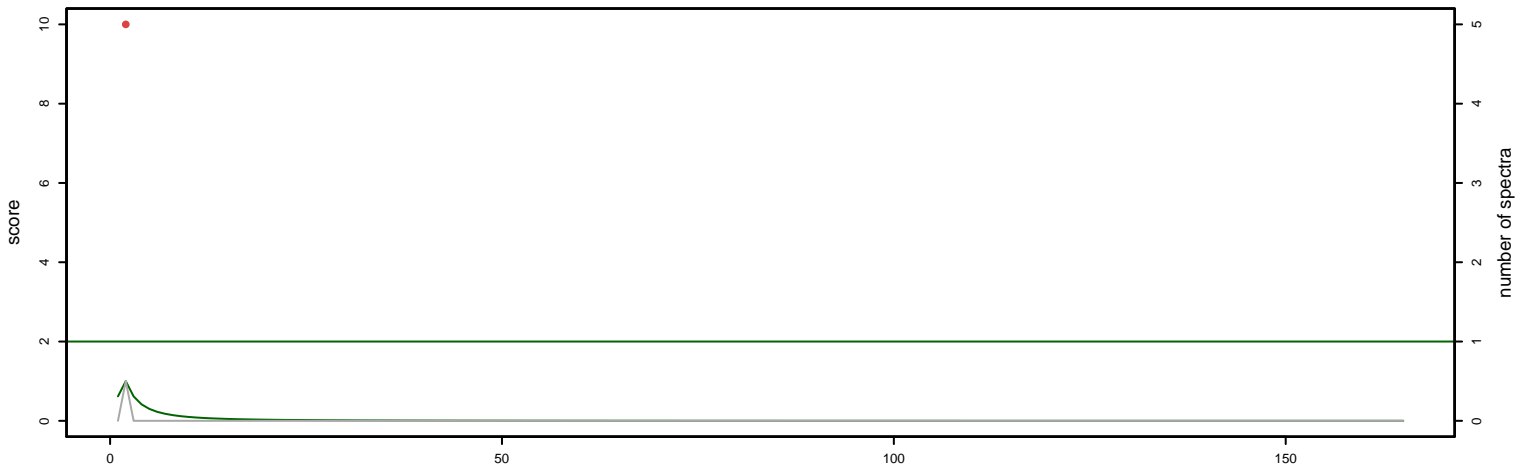

## replica

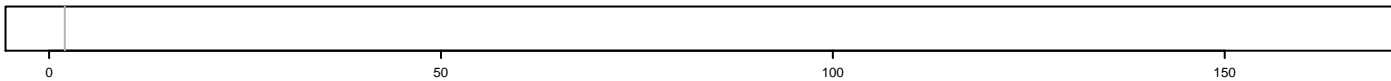

## stability

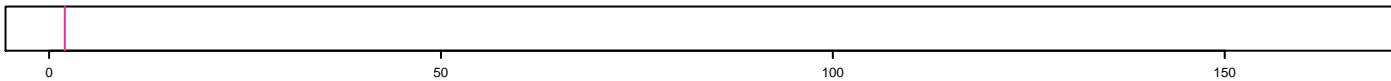

# Glia maturation factor beta (P60983)

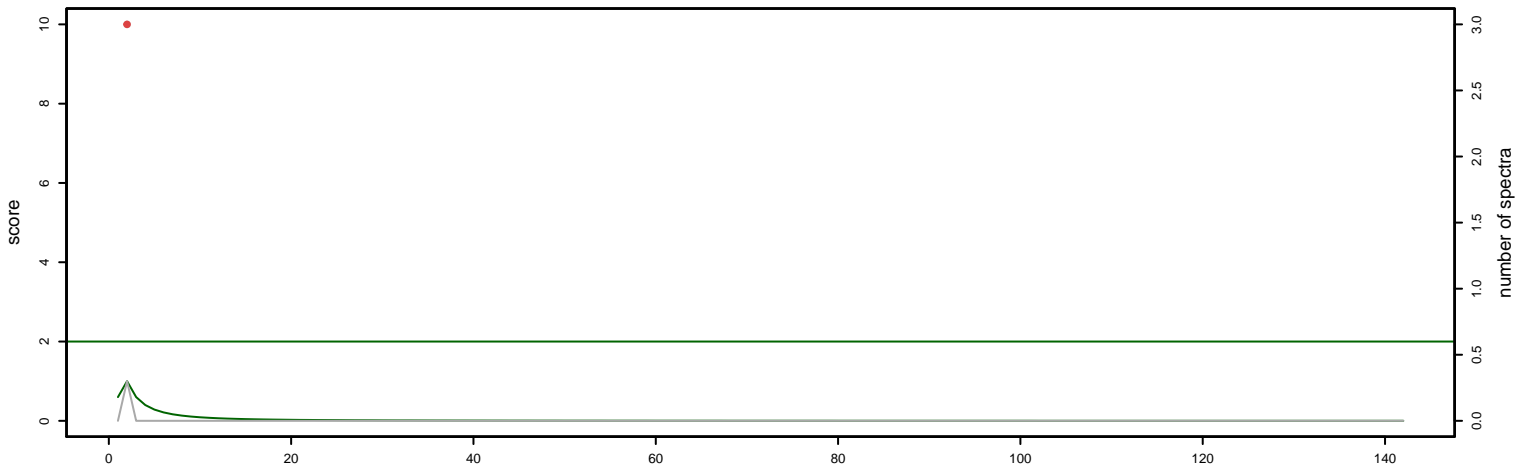

replica

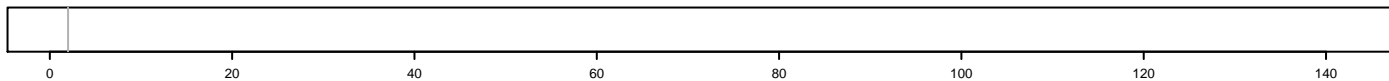

stability

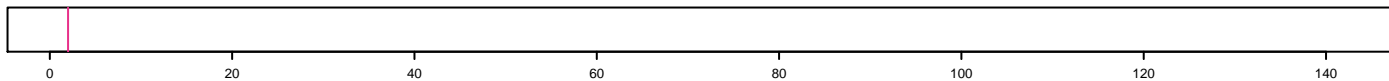

# Ubiquitin-conjugating enzyme E2 N (P61088)

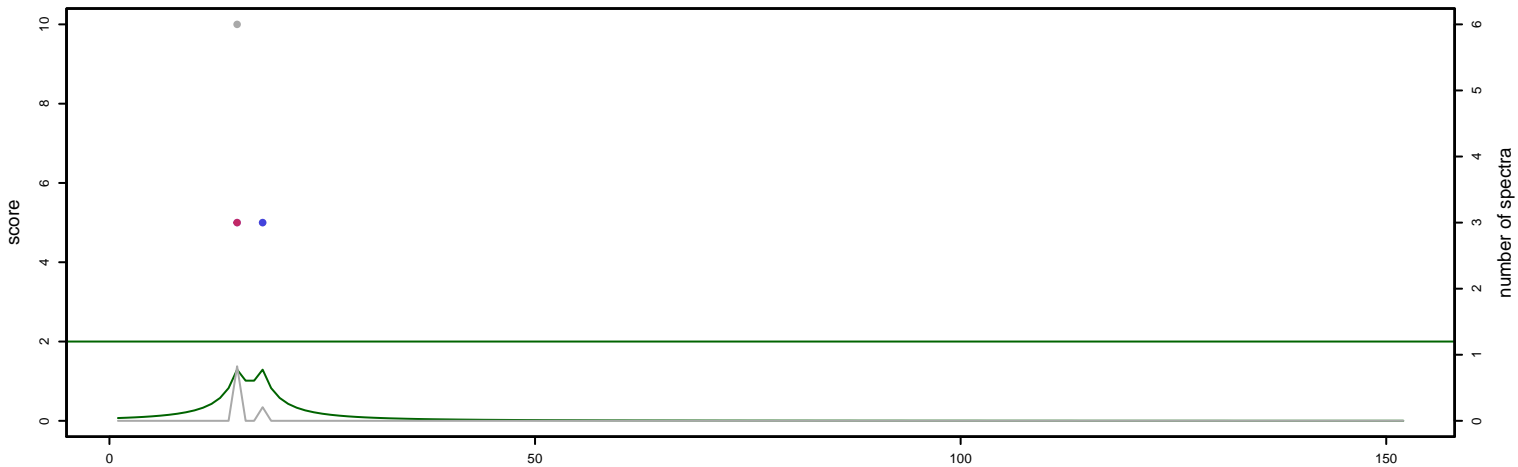

replica

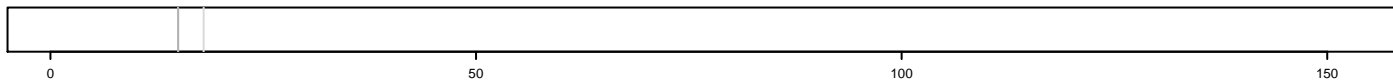

stability

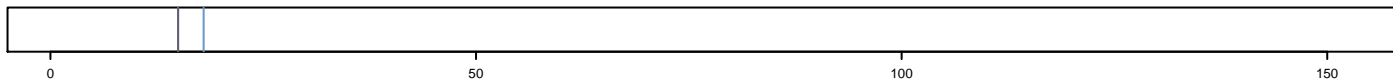



# Protein mago nashi homolog (P61326)

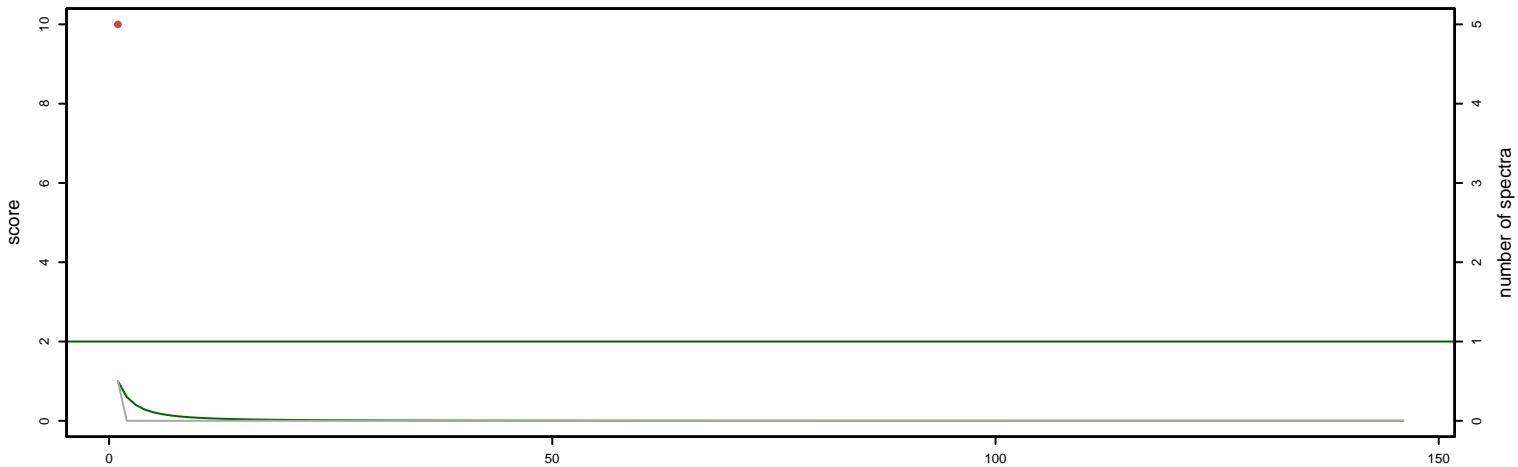

replica

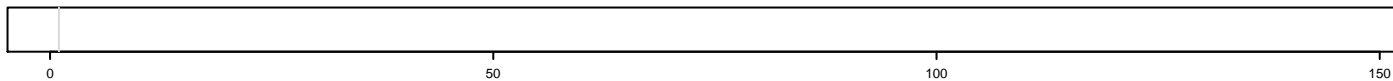

stability

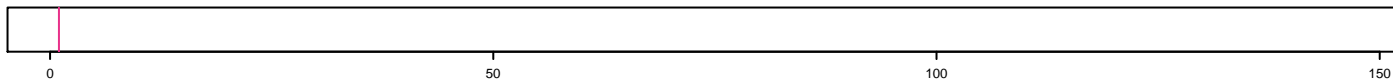

# Heterogeneous nuclear ribonucleoprotein K (P61978)

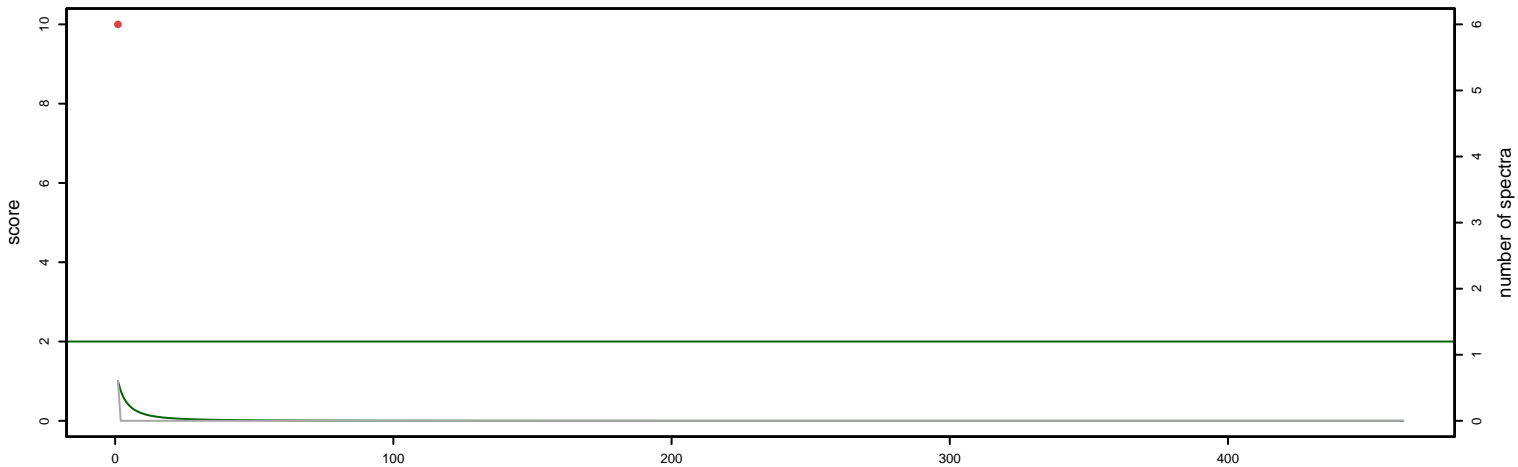

replica

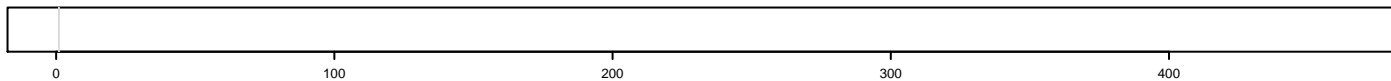

stability

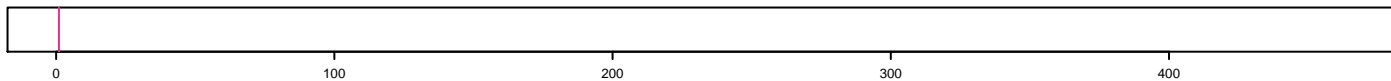

# Serine/threonine-protein phosphatase PP1-alpha catalytic subunit (P62136)

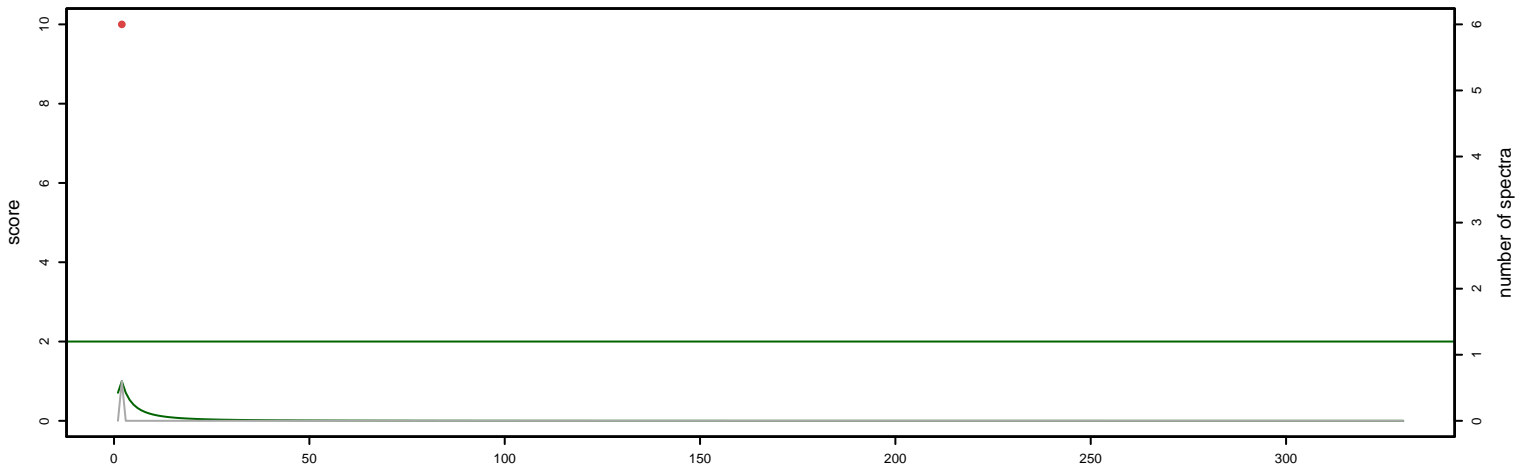

replica

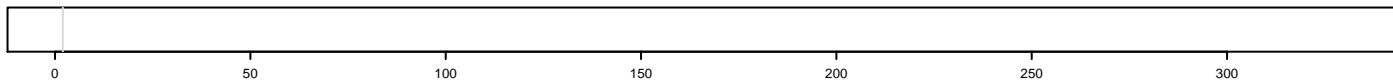

stability

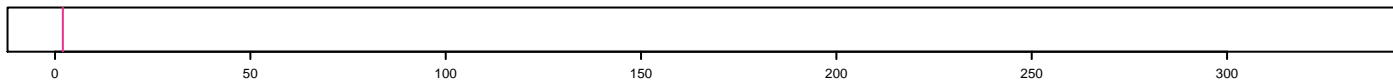

# Serine/threonine-protein phosphatase PP1-beta catalytic subunit (P62140)

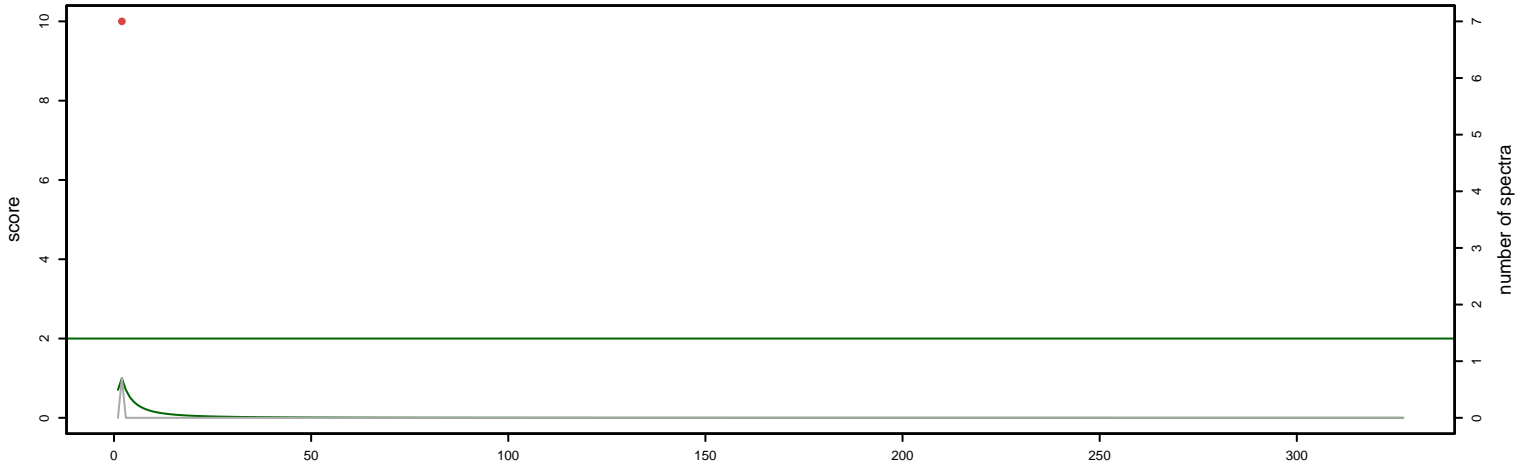

replica

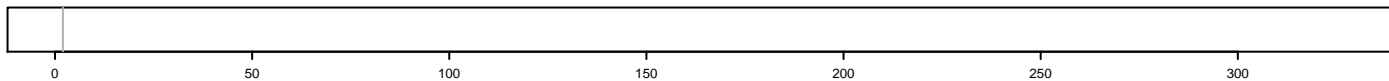

stability

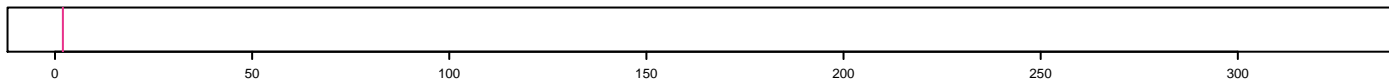

# 26S protease regulatory subunit 8 (P62195)

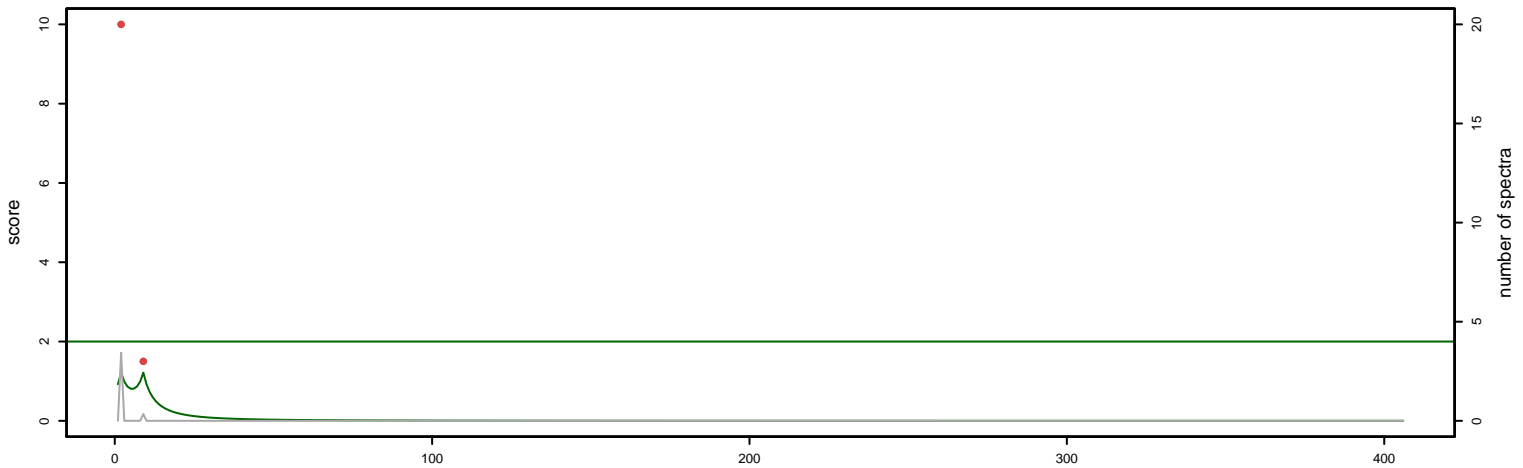

replica

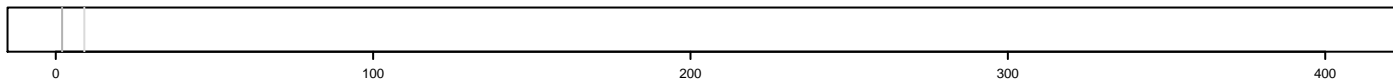

stability

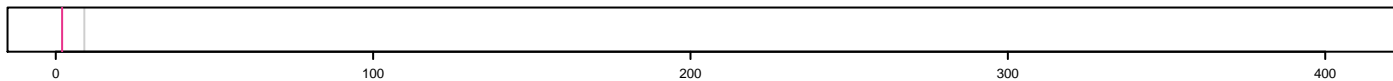

# 14-3-3 protein epsilon (P62258)

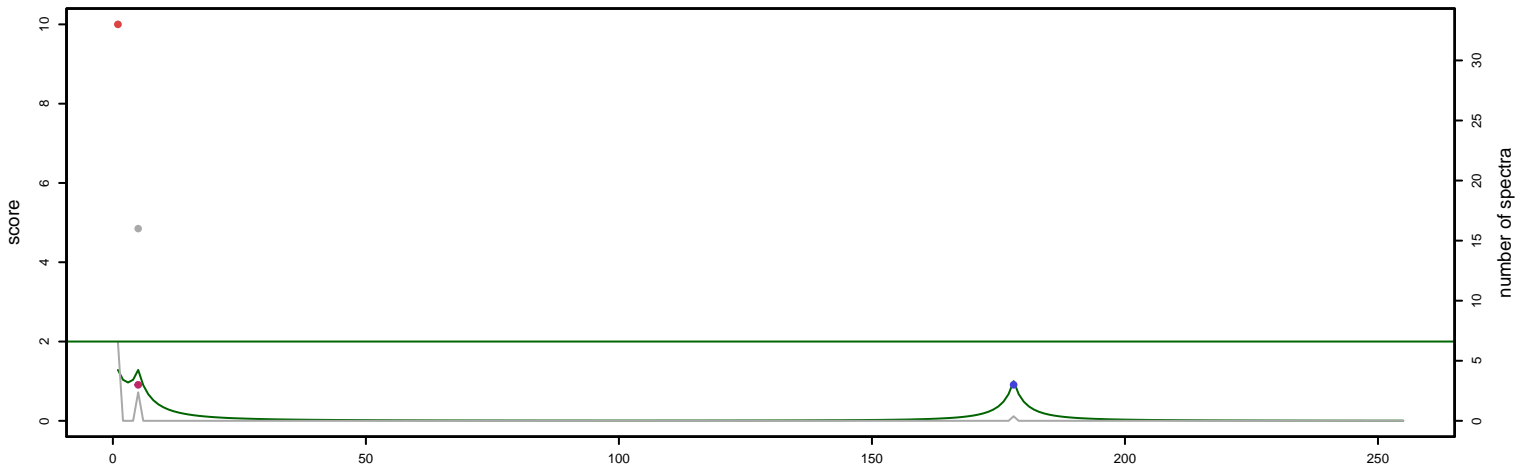

replica

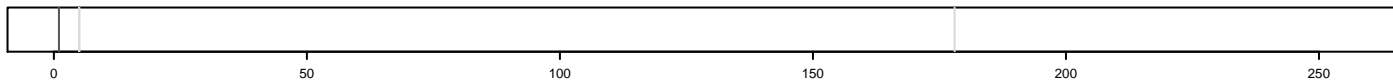

stability

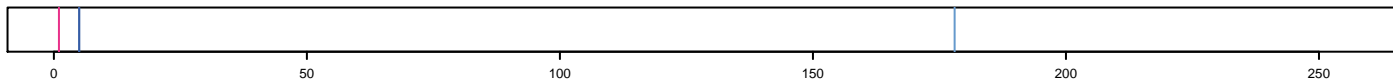

# 26S protease regulatory subunit 10B (P62333)

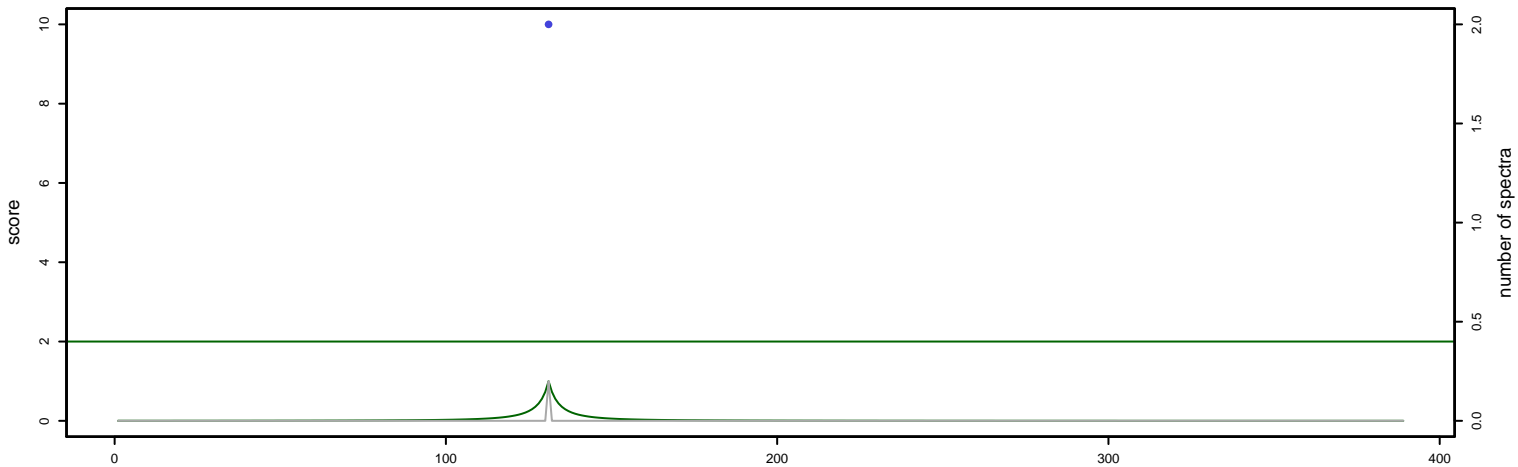

replica

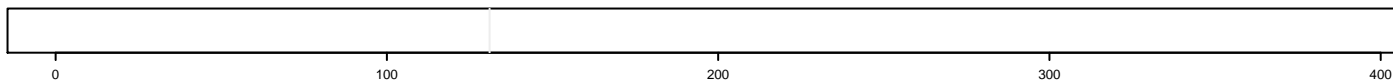

stability

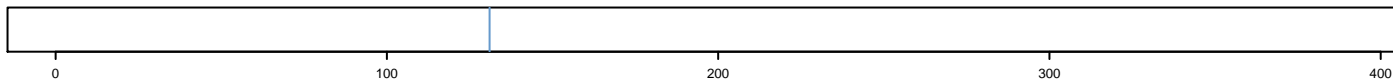

# Eukaryotic peptide chain release factor subunit 1 (P62495)

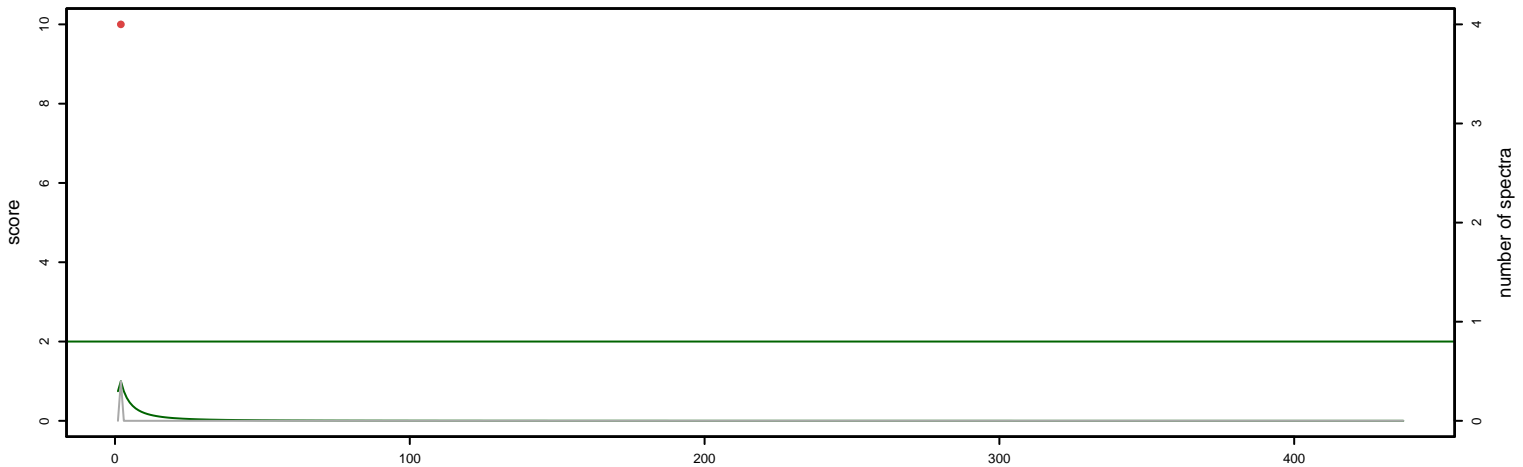

replica

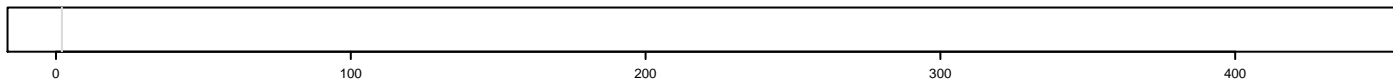

stability

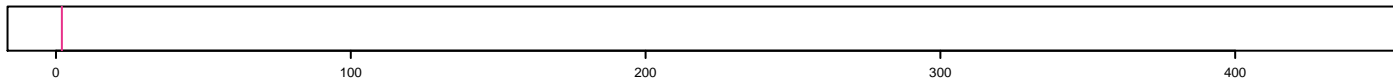



# Cellular nucleic acid-binding protein (P62633)

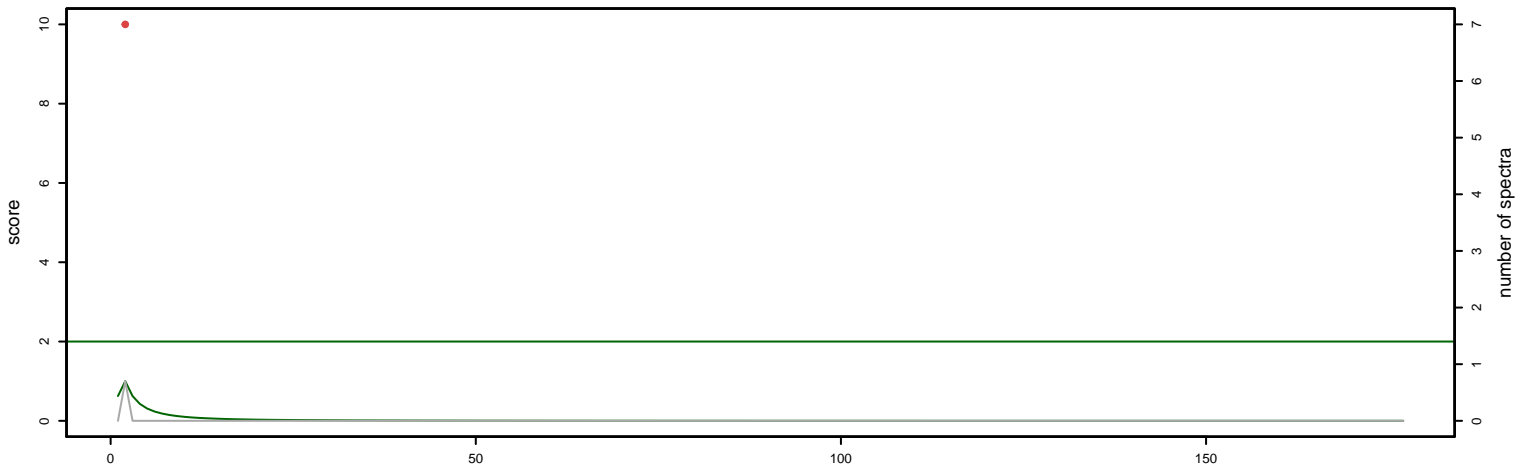

replica

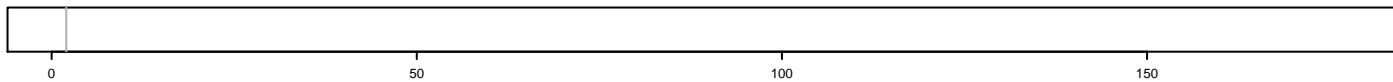

stability

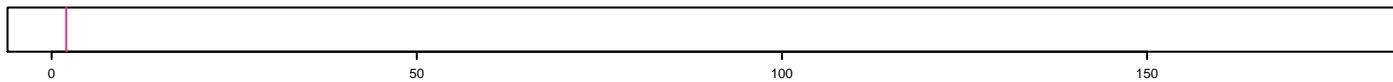

# GTP-binding nuclear protein Ran (P62826)

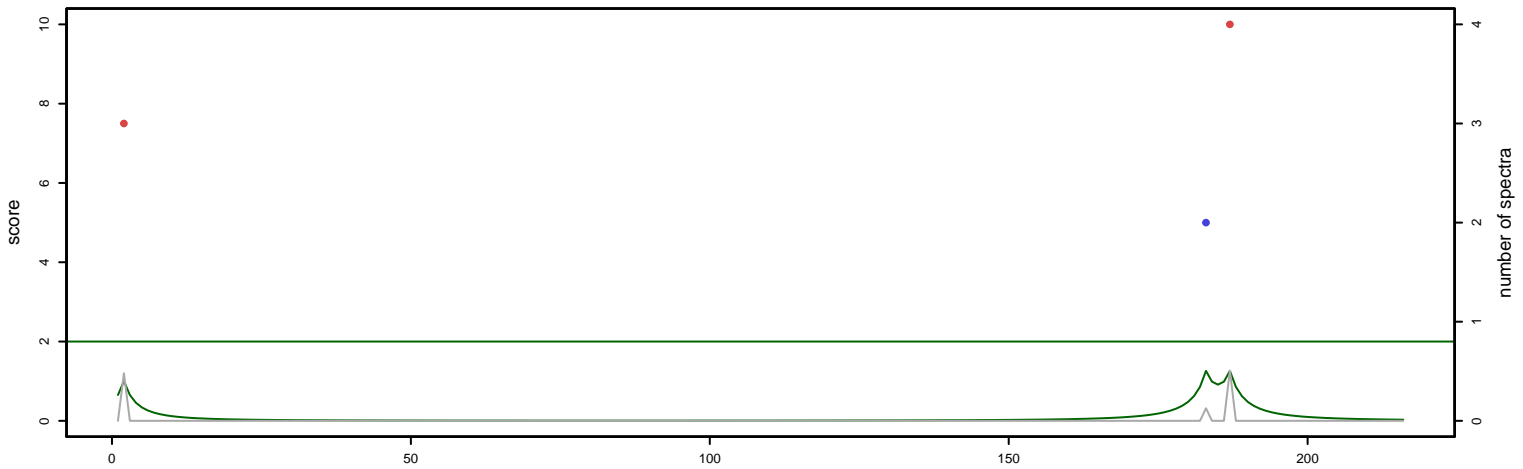

replica

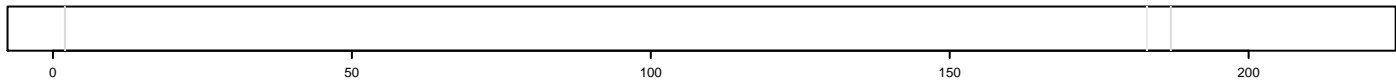

stability

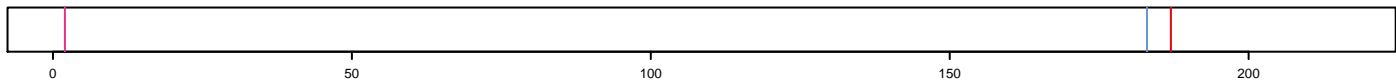

### E3 ubiquitin-protein ligase RBX1 (P62877)

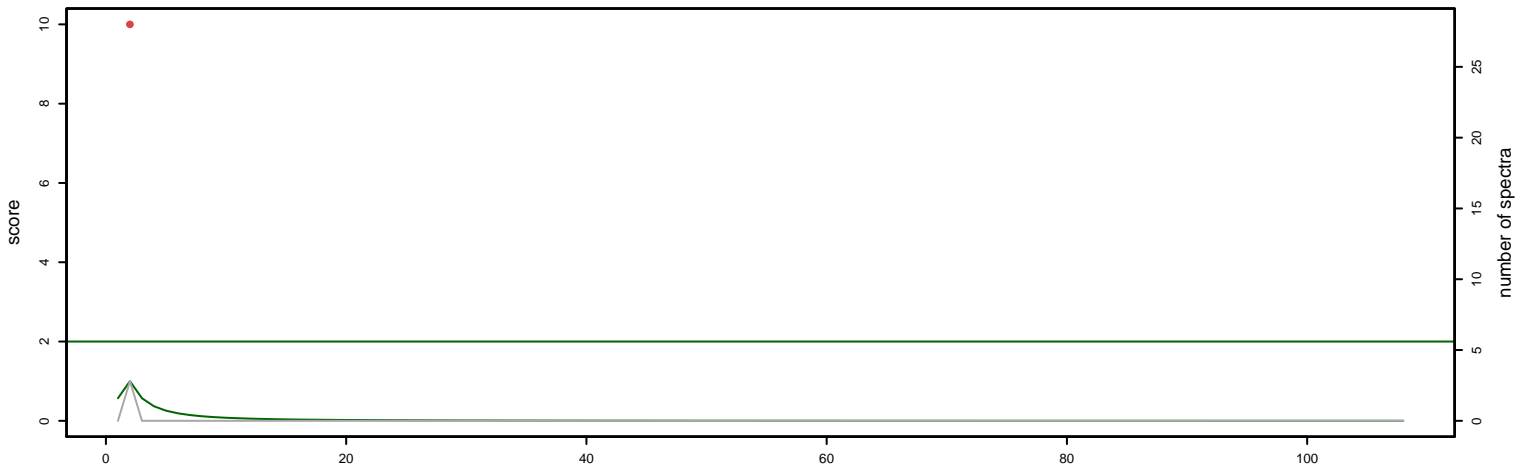

replica

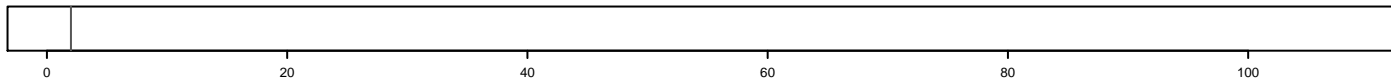

stability

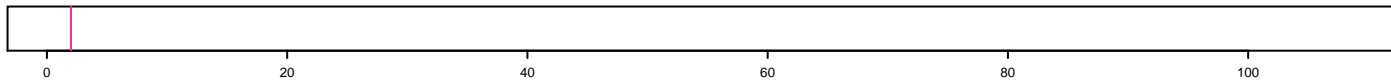

# 60S ribosomal protein L11 (P62913)

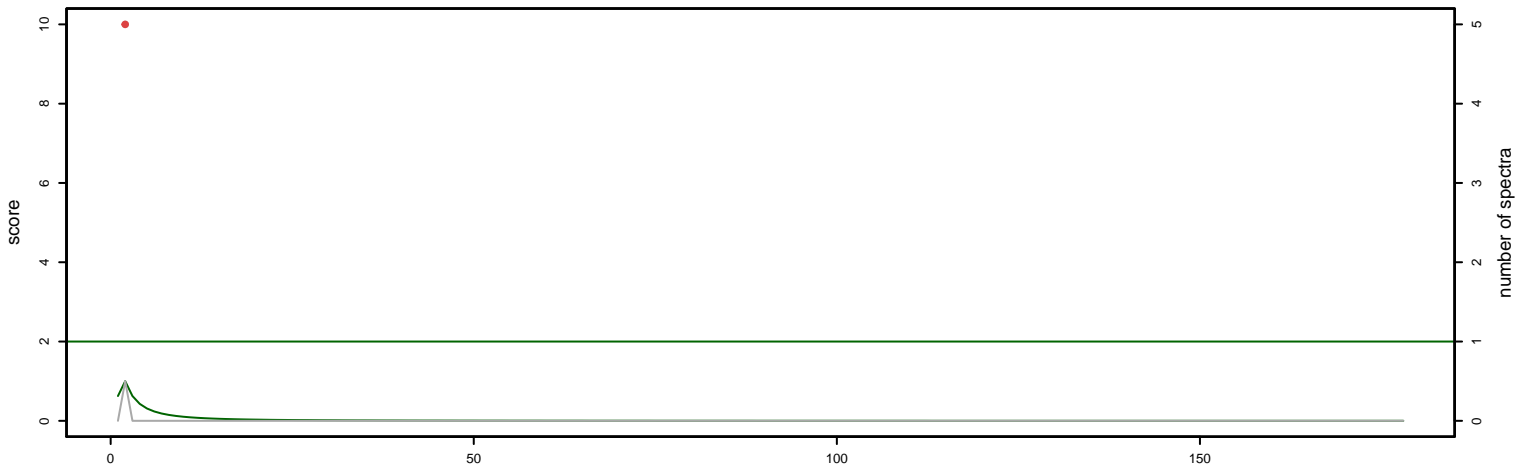

replica

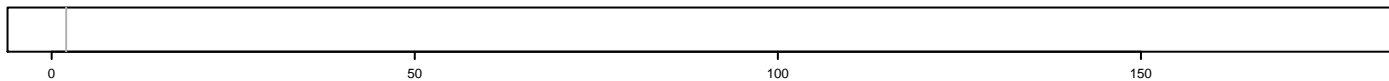

stability

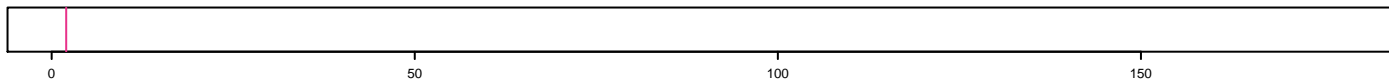

# Peptidyl-prolyl cis-trans isomerase A (P62937)

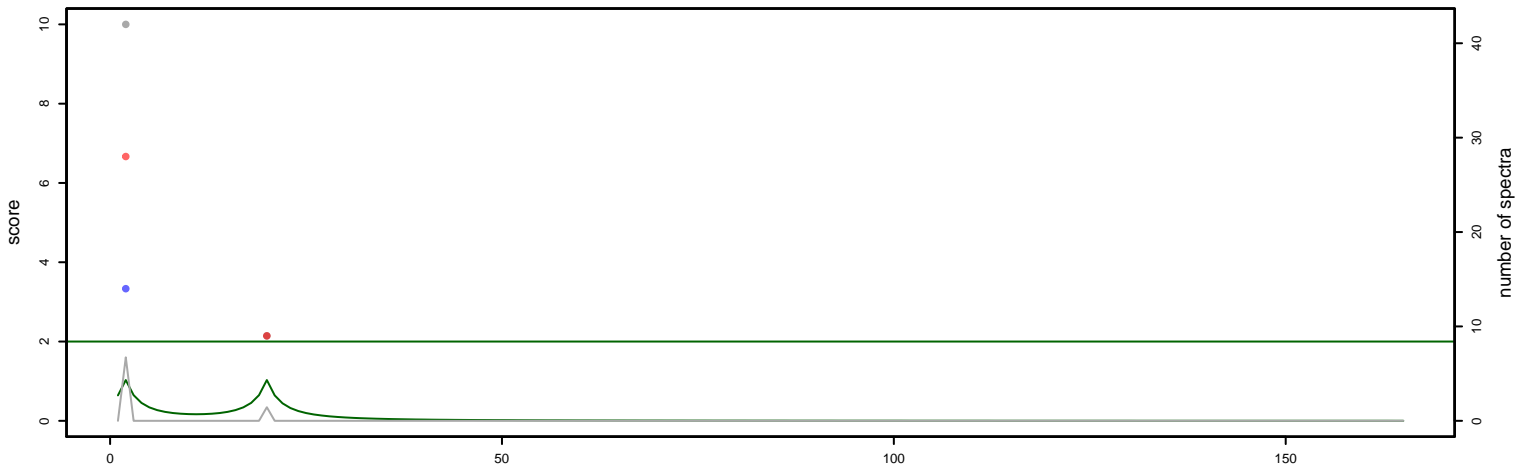

replica

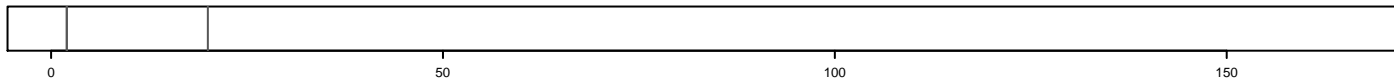

stability

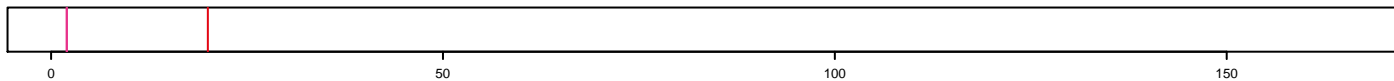

# Peptidyl-prolyl cis-trans isomerase FKBP1A (P62942)

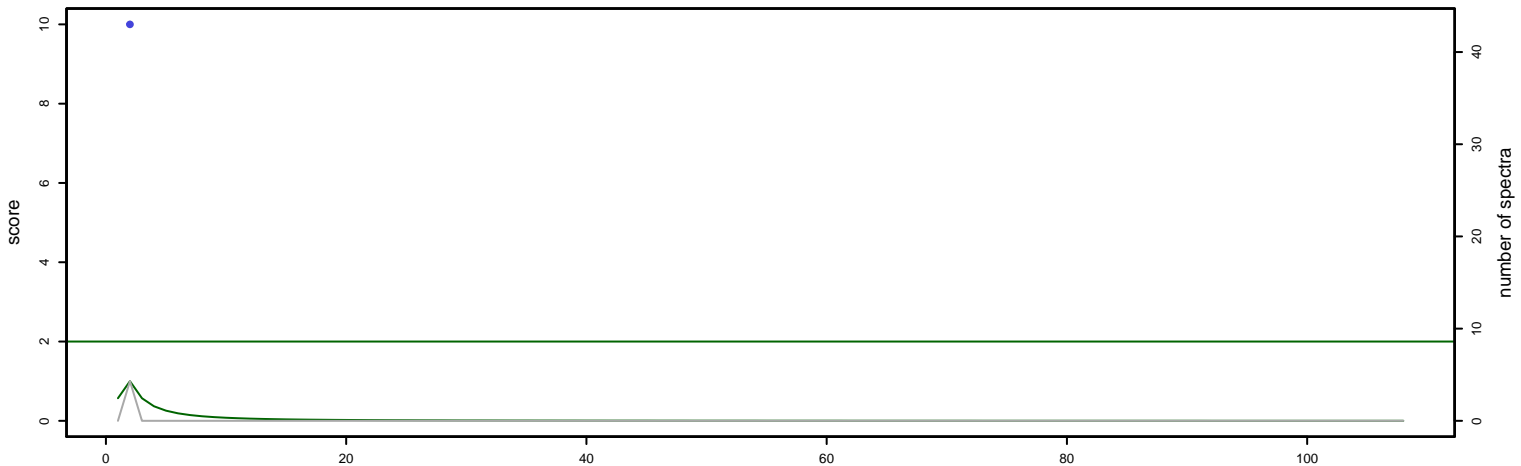

replica

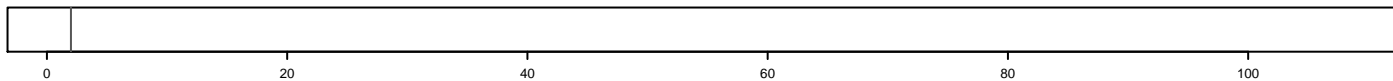

stability

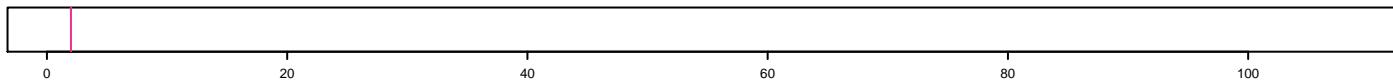

# 14-3-3 protein zeta/delta (P63104)

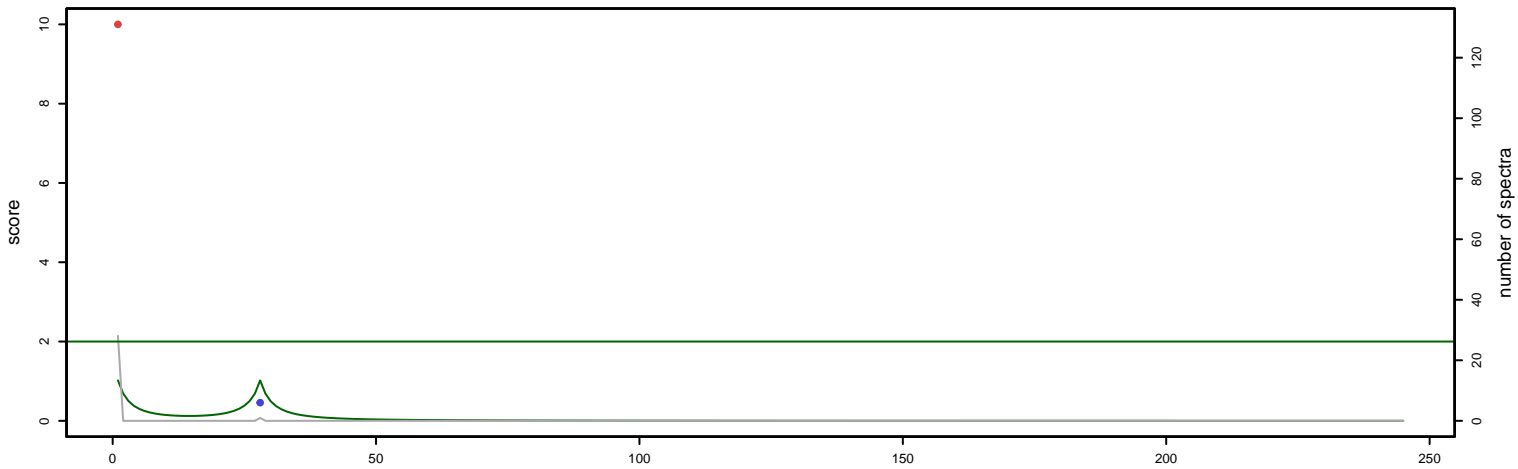

replica

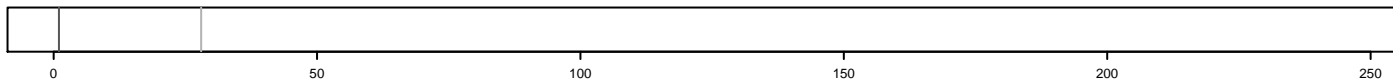

stability

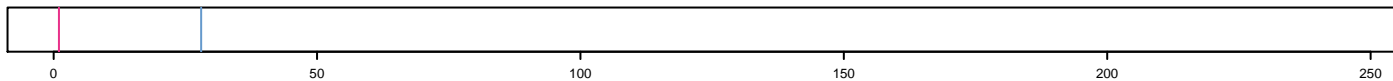

# Guanine nucleotide-binding protein G(I)/G(S)/G(O) subunit gamma-5 (P63218)

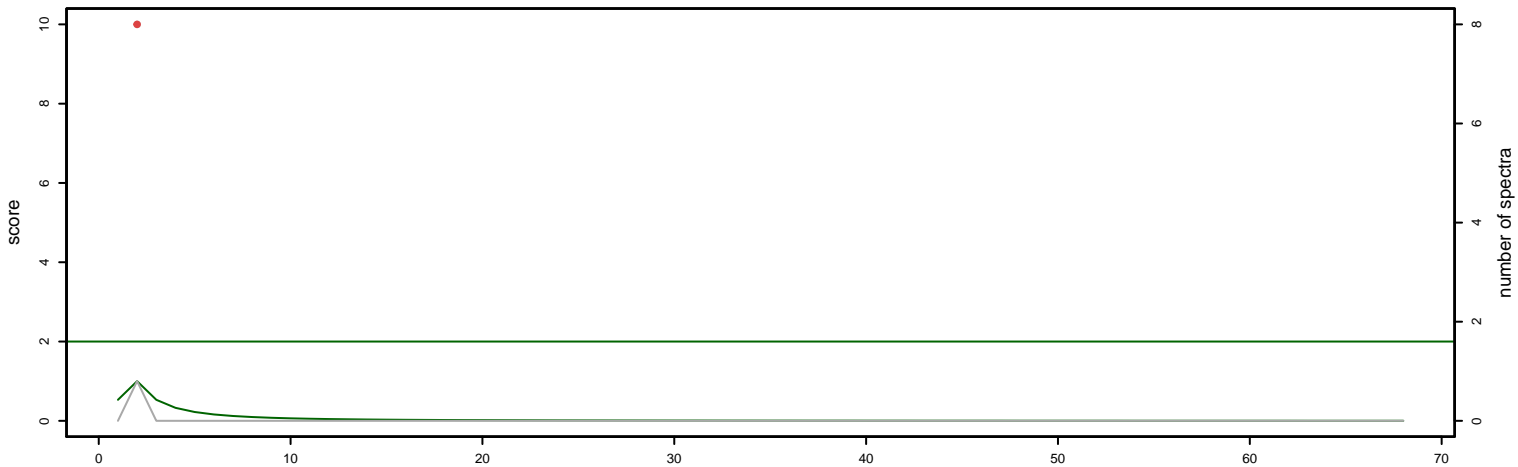

replica

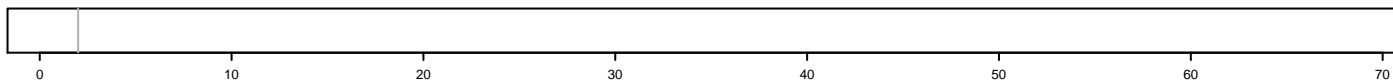

stability

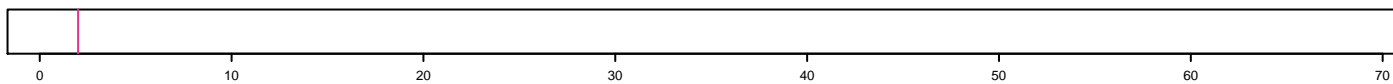



# Eukaryotic translation initiation factor 5A-1 (P63241)

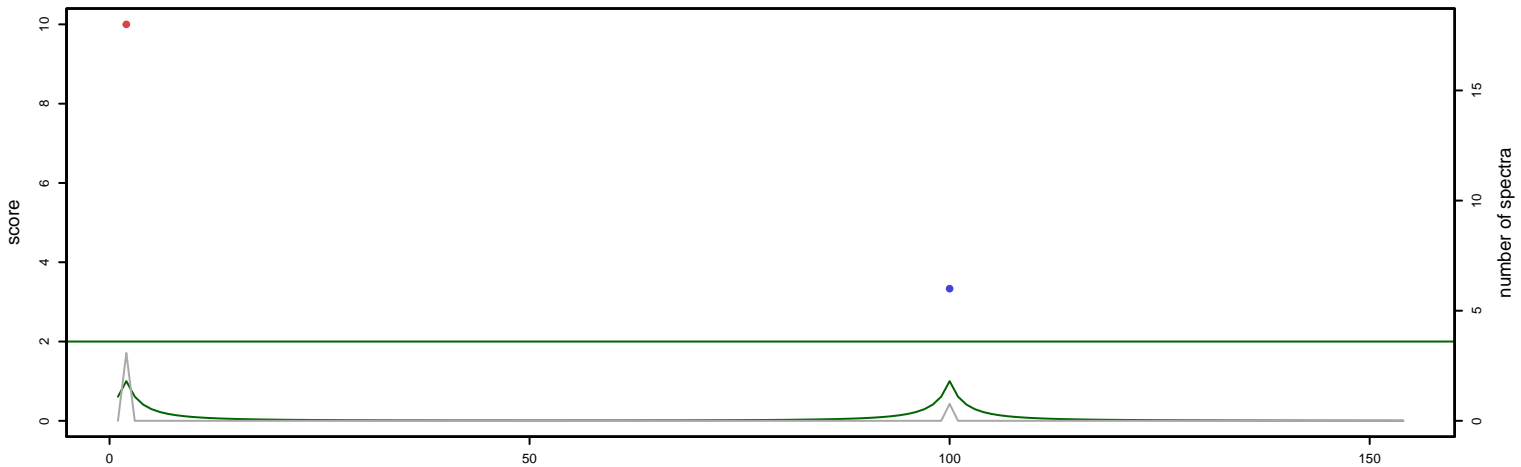

replica

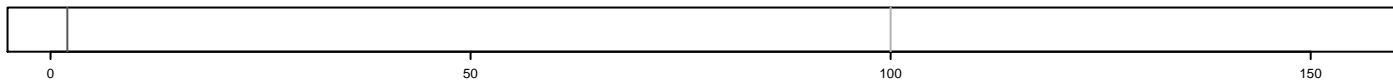

stability

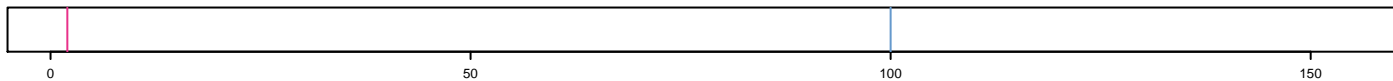

# Actin, cytoplasmic 2 (P63261)

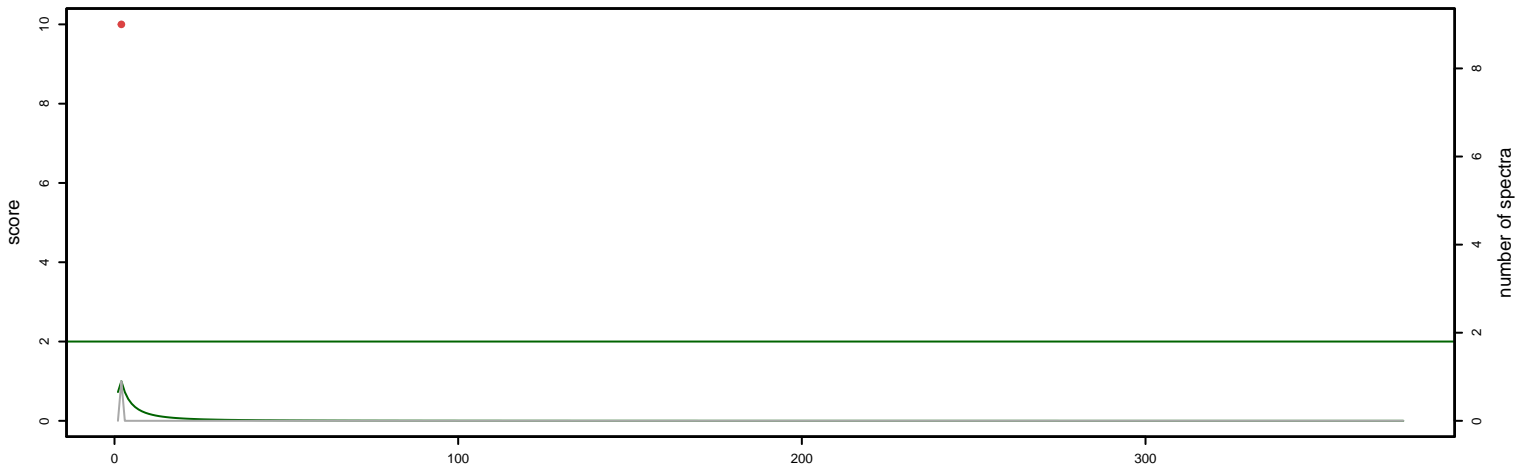

replica

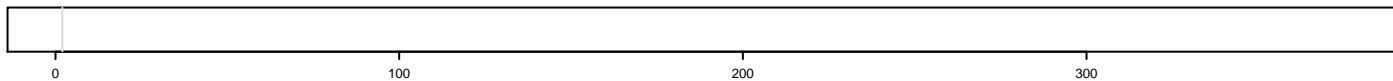

stability

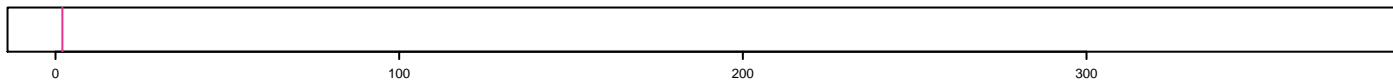

# Serine/threonine-protein phosphatase 2A catalytic subunit alpha isoform (P67775)

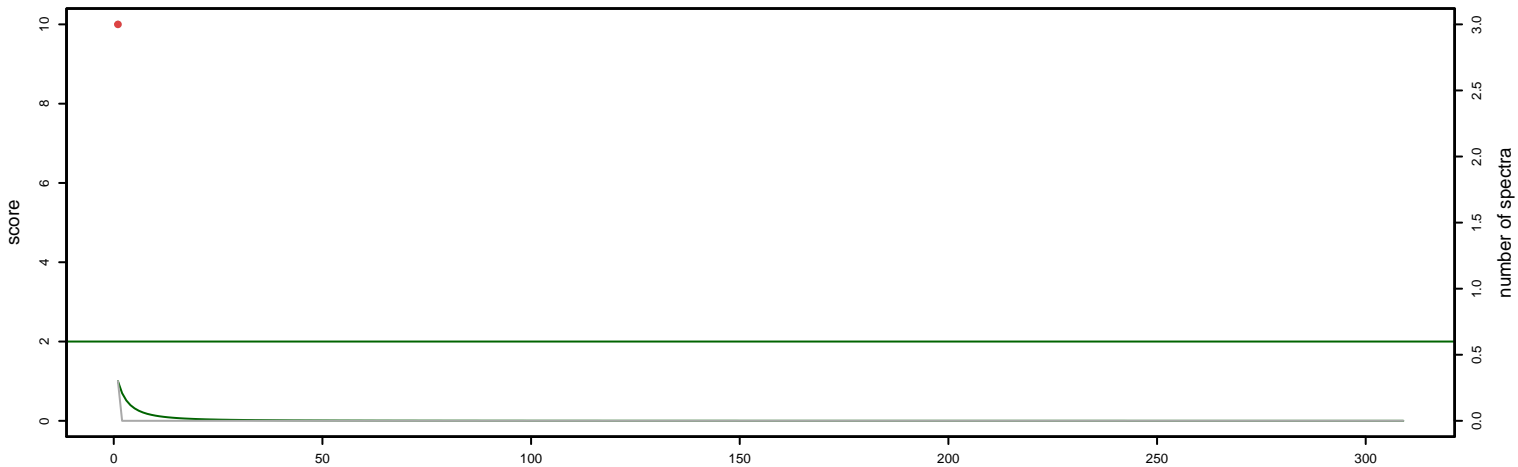

replica

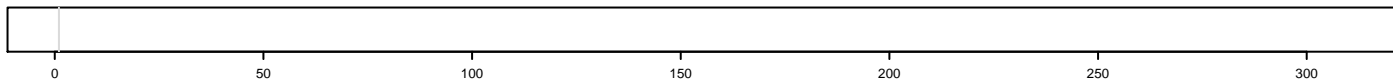

stability

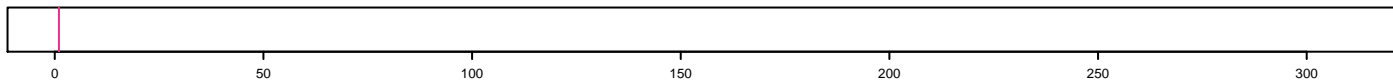

Platelet-activating factor acetylhydrolase IB subunit beta (P68402)

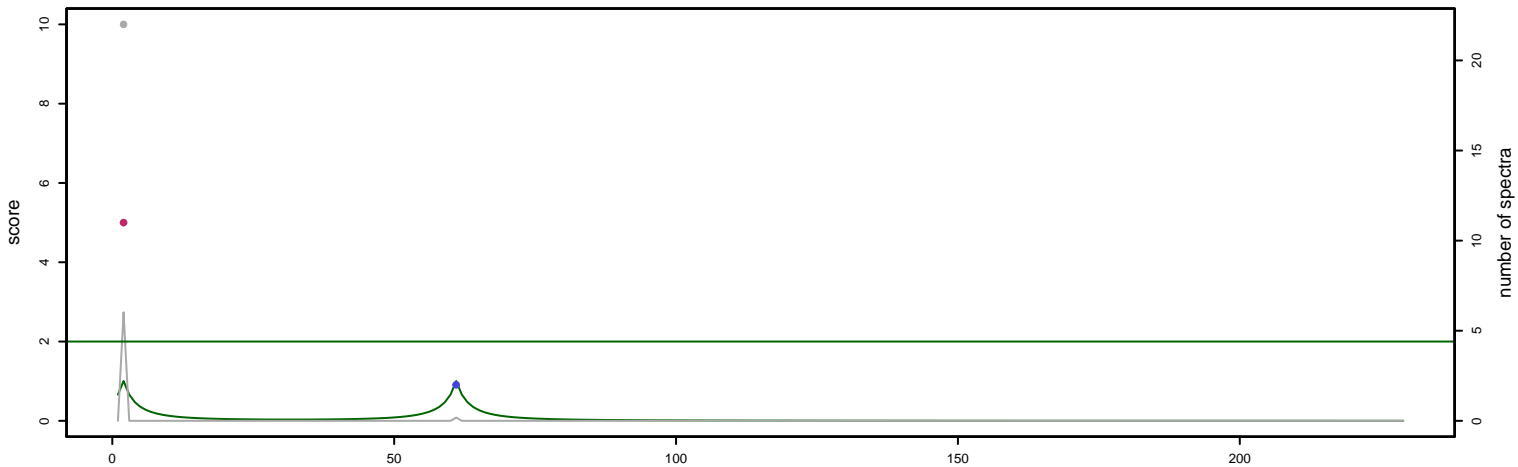

replica

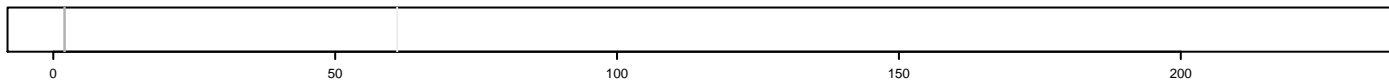

stability

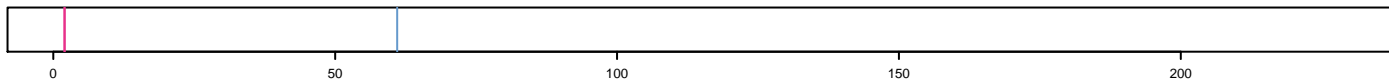

### Hemoglobin subunit beta (P68871)

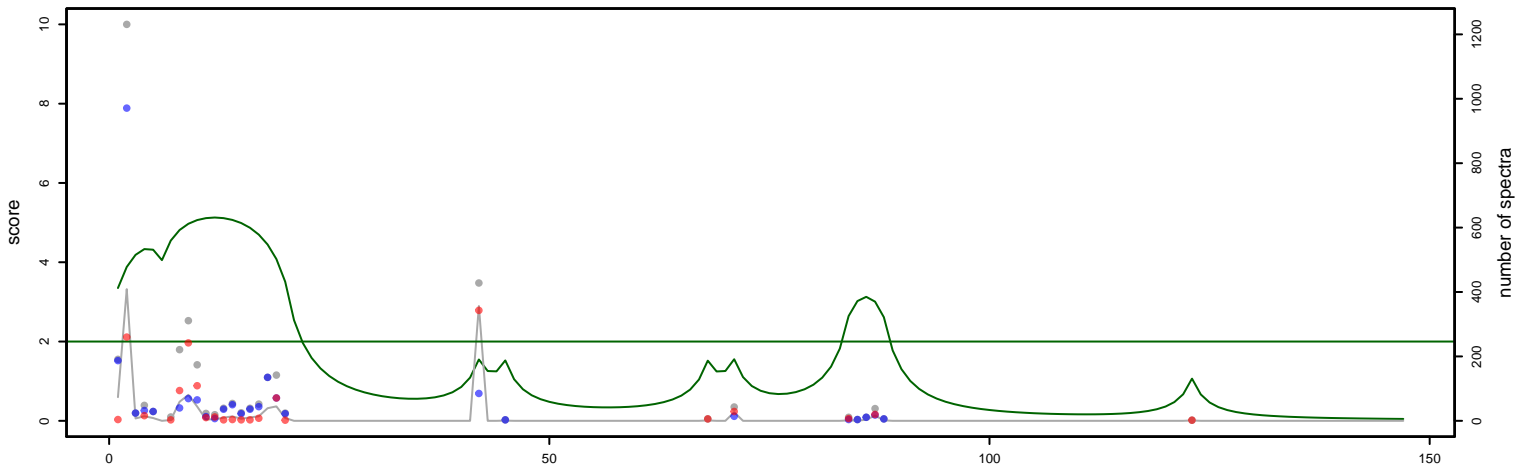

### replica

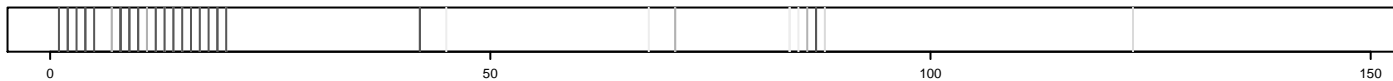

### stability

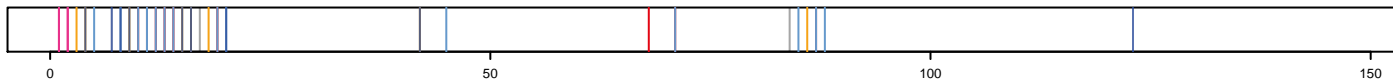

# Hemoglobin subunit gamma-1 (P69891)

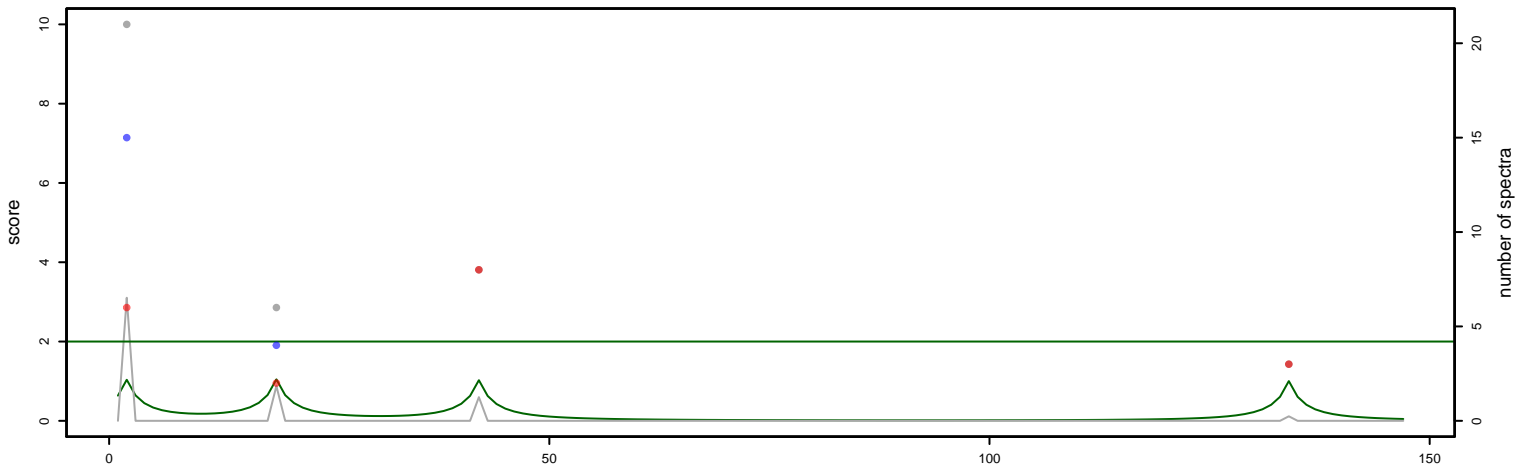

replica

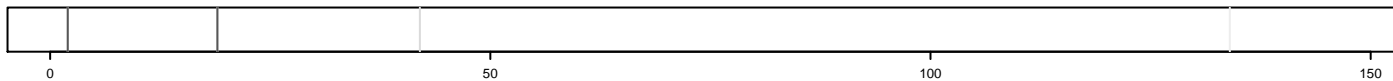

stability

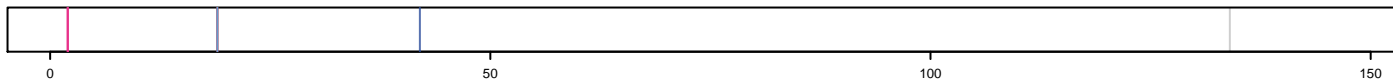

# Hemoglobin subunit gamma-2 (P69892)

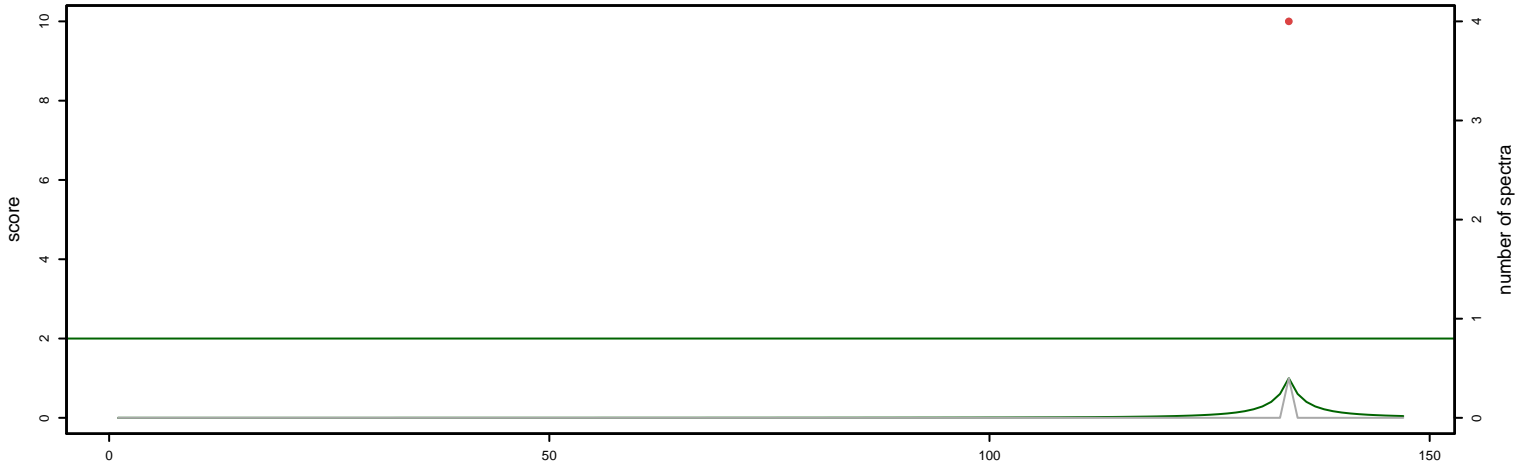

replica

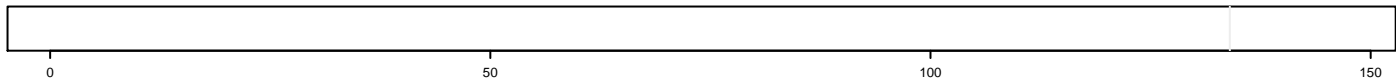

stability

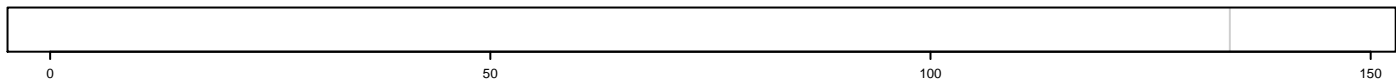

# Hemoglobin subunit alpha (P69905)

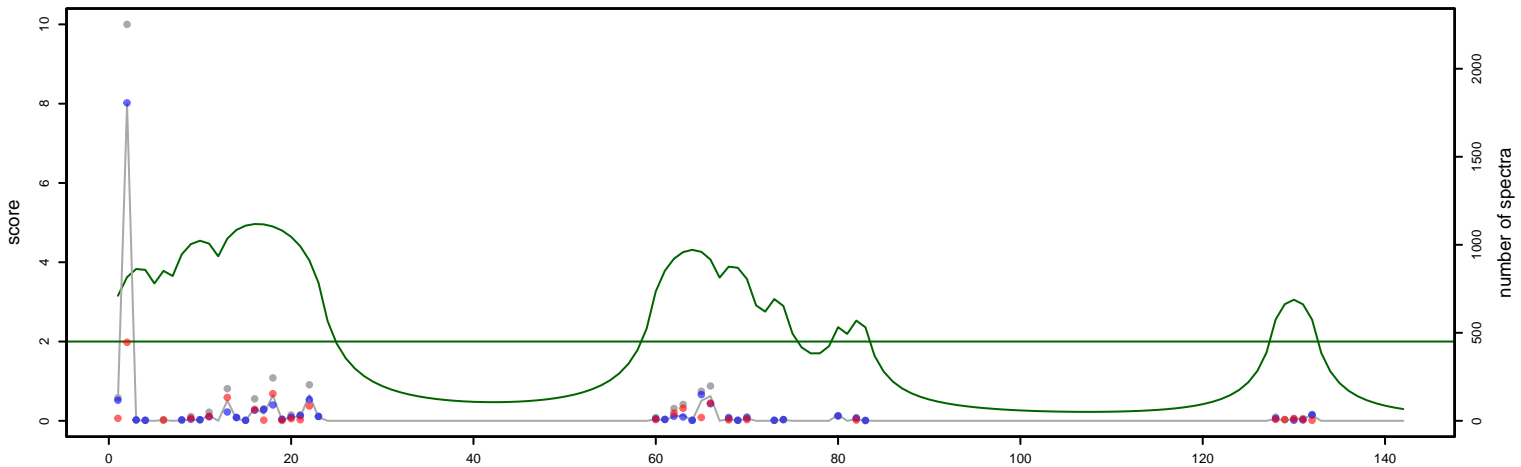

## replica

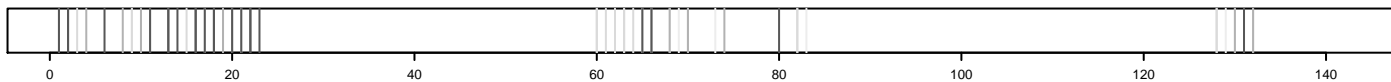

## stability

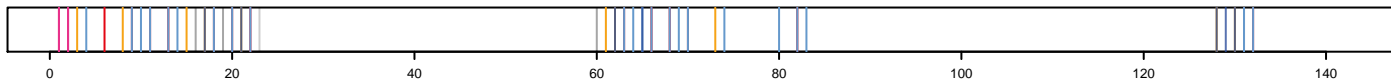



# Immunoglobulin-binding protein 1 (P78318)

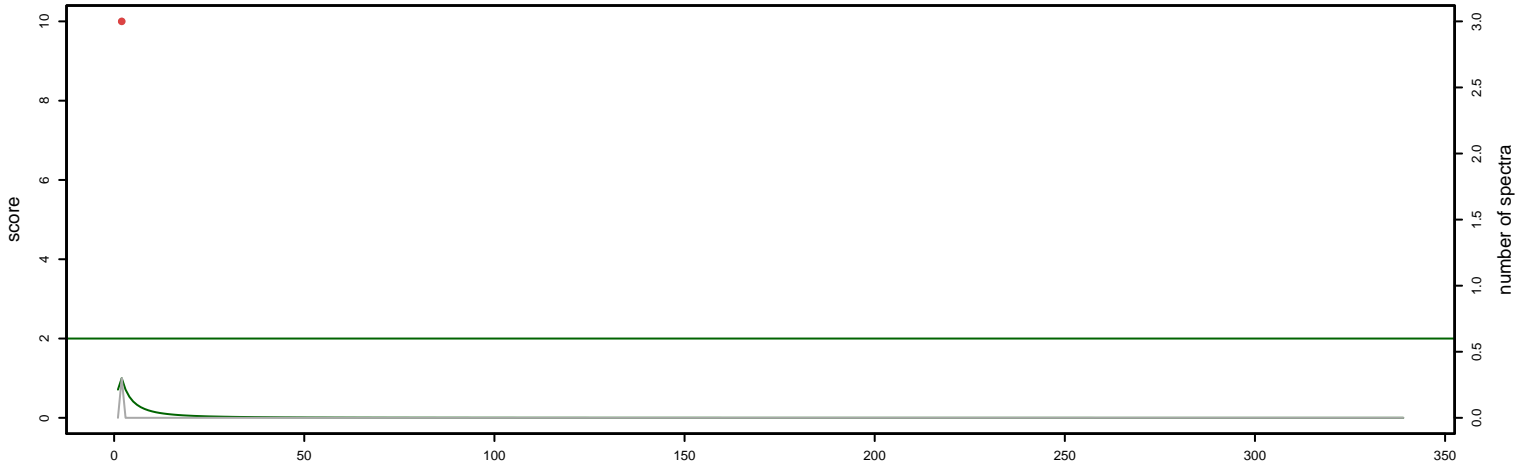

replica

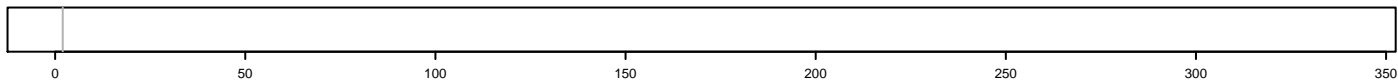

stability

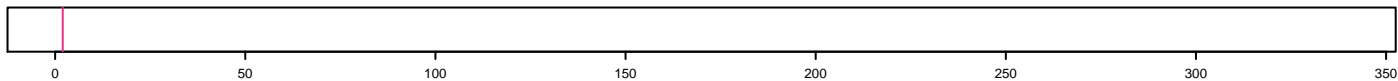

# Phosphoserine phosphatase (P78330)

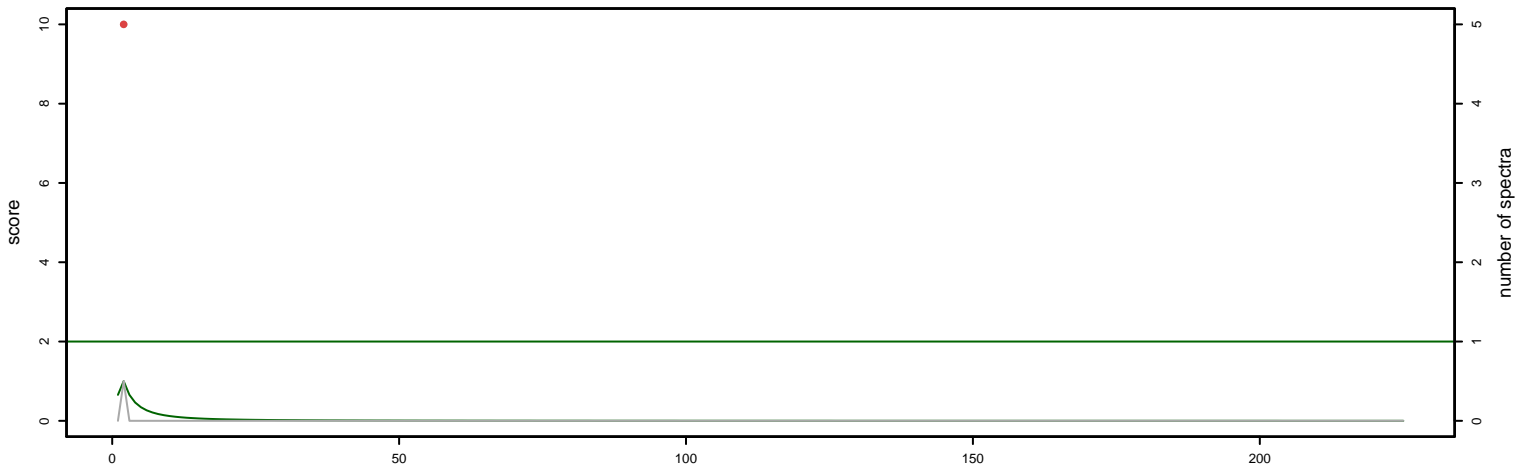

replica

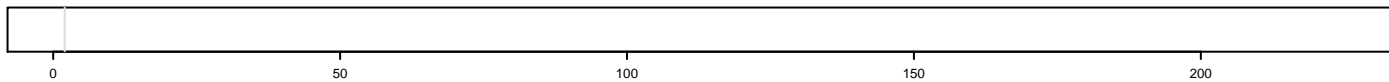

stability

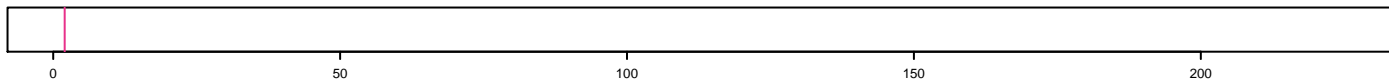

# T-complex protein 1 subunit beta (P78371)

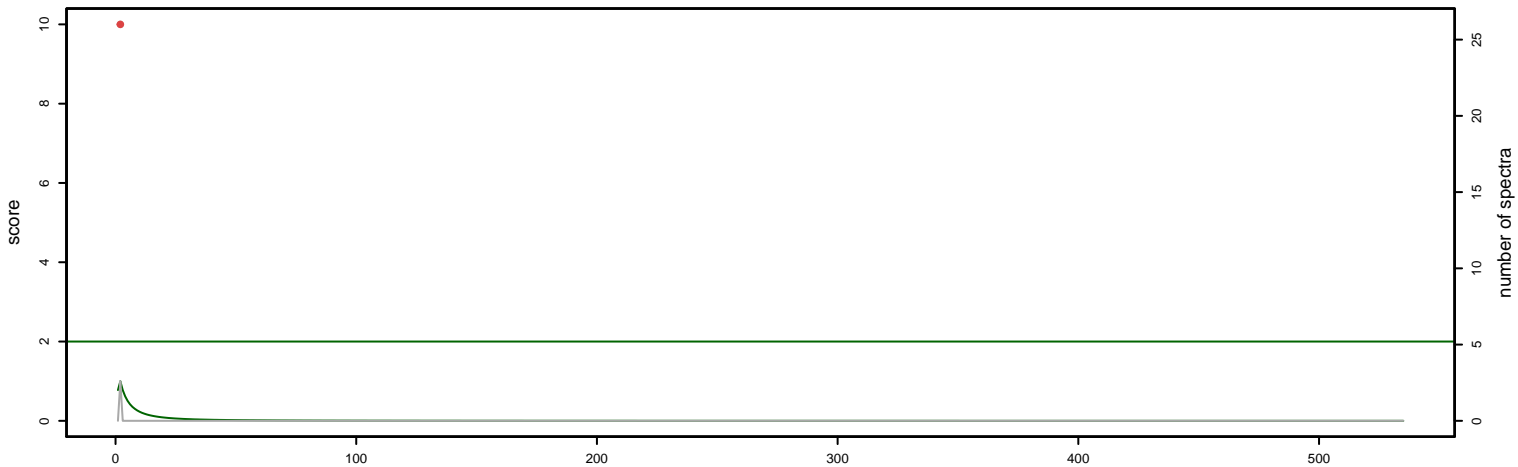

replica

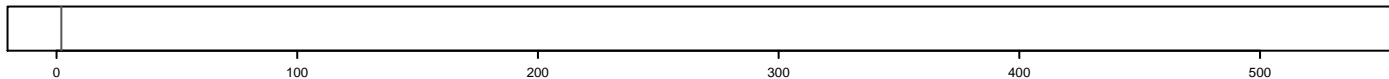

stability

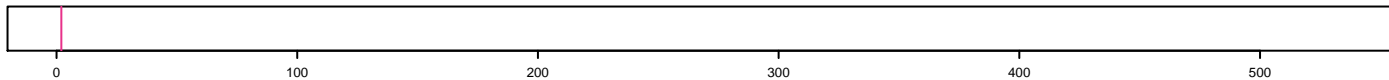

# Glutathione S-transferase omega-1 (P78417)

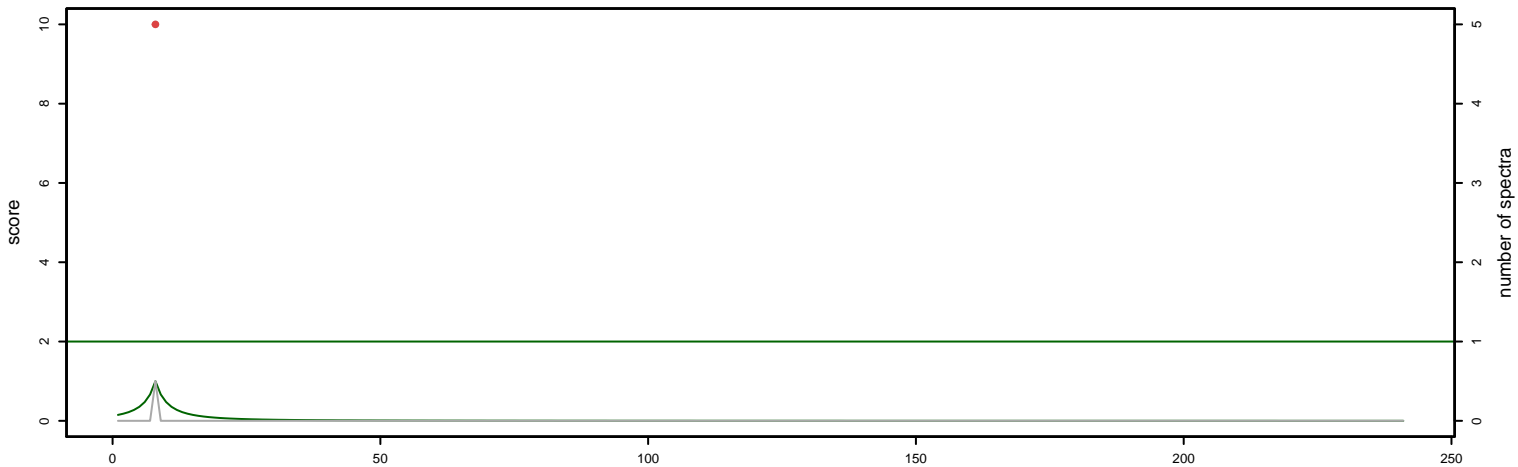

replica

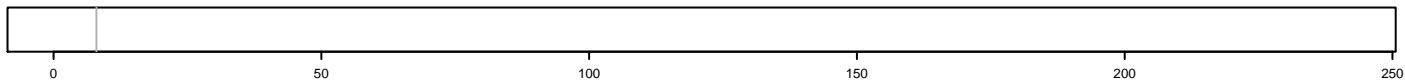

stability

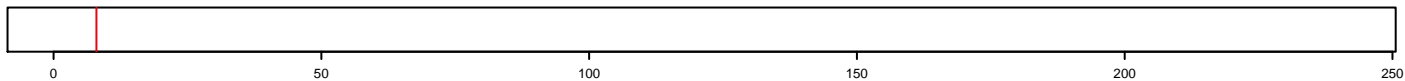

# Interferon-induced 35 kDa protein (P80217)

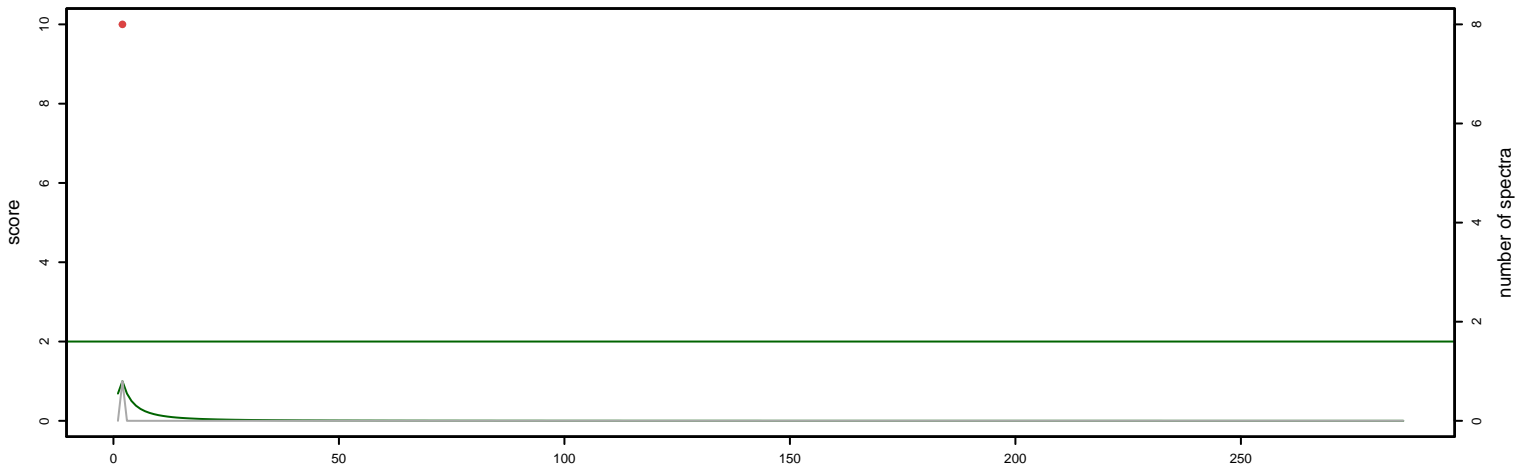

replica



stability



### 55 kDa erythrocyte membrane protein (Q00013)

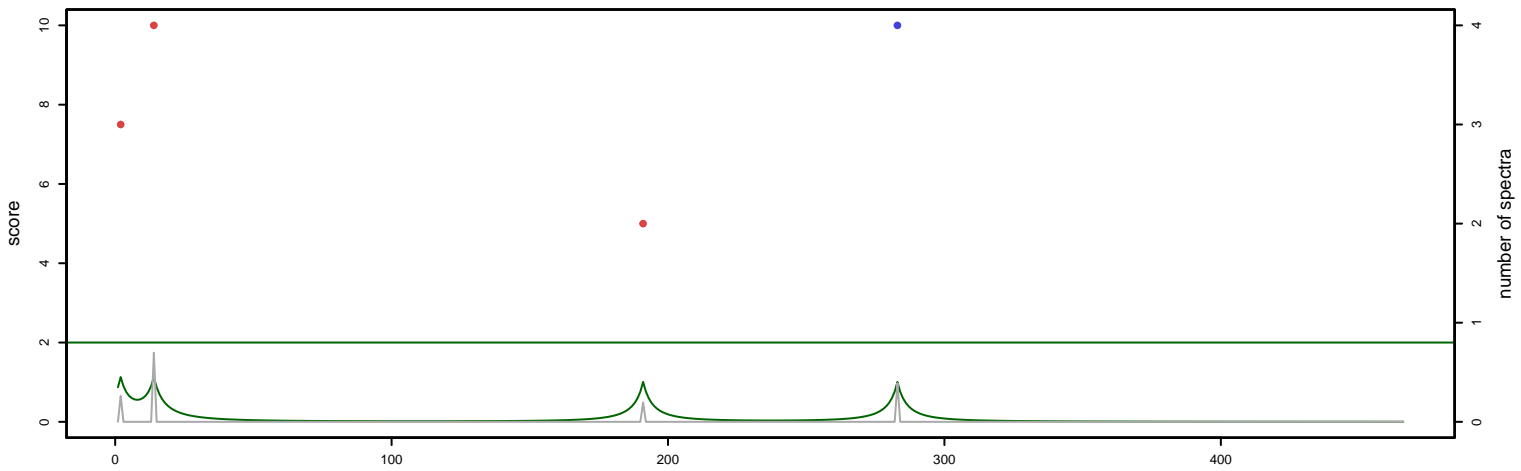

#### replica

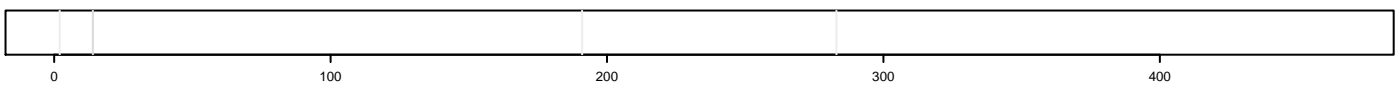

#### stability

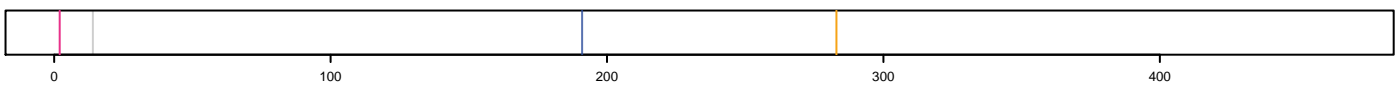

### Cyclin-dependent kinase 6 (Q00534)

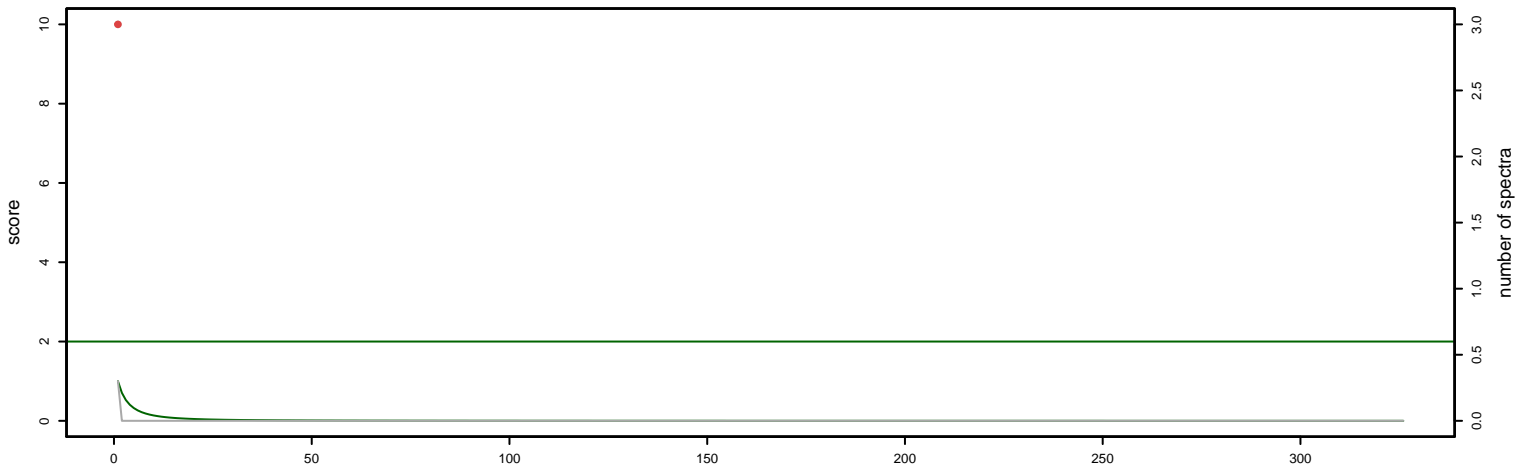

replica

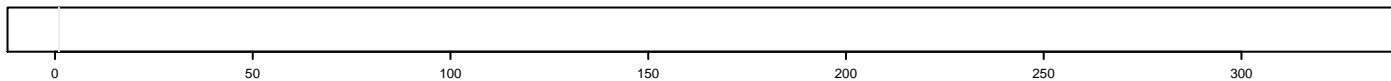

stability

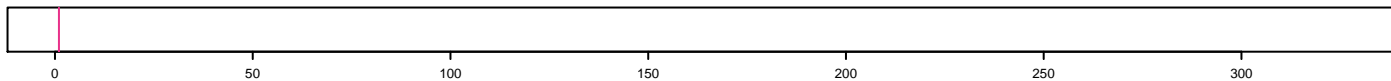

### Transcriptional activator protein Pur-alpha (Q00577)

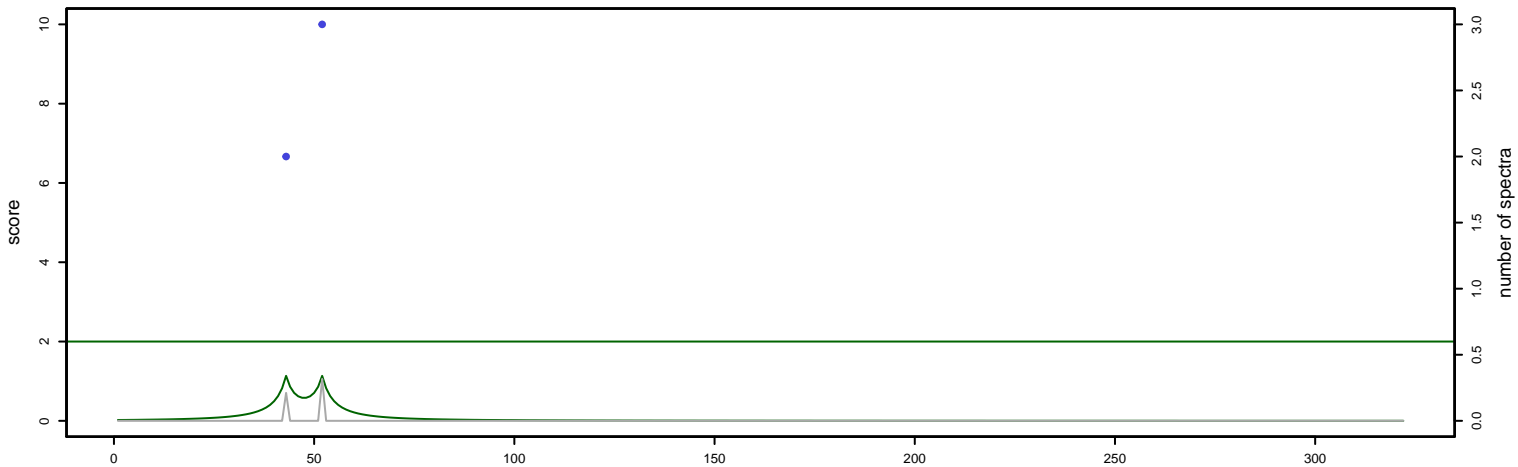

replica

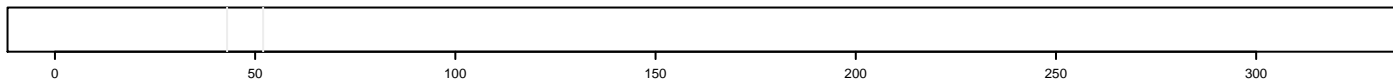

stability

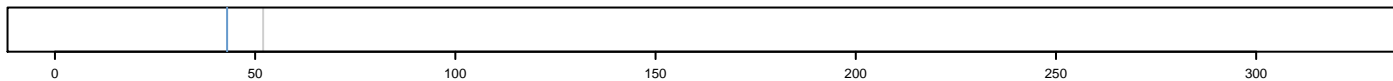



# Clathrin heavy chain 1 (Q00610)

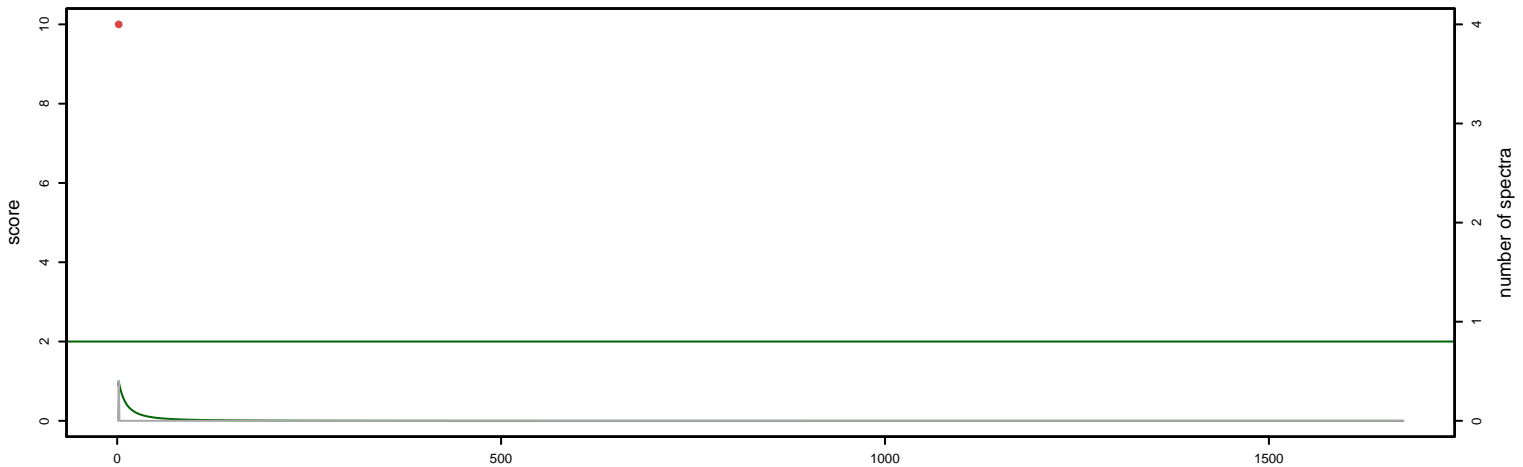

replica

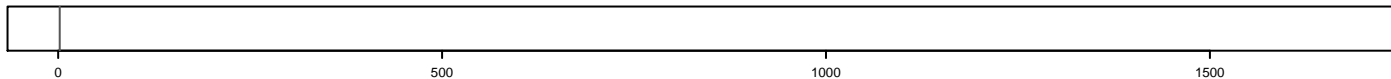

stability

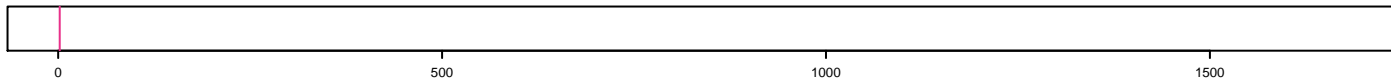

Peptidyl-prolyl cis-trans isomerase FKBP3 (Q00688)

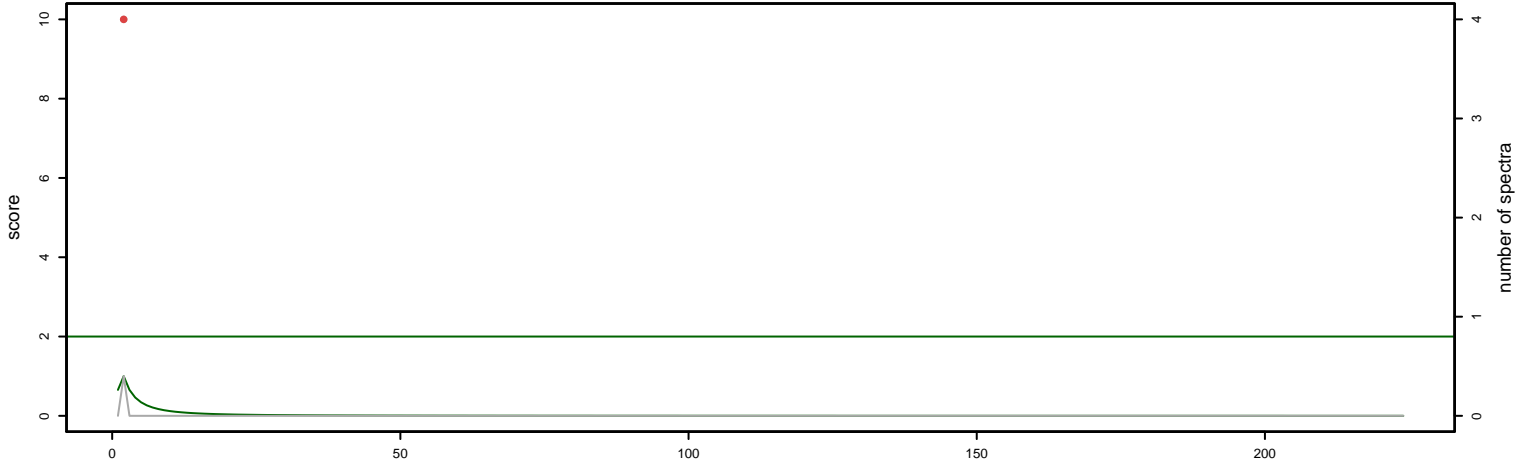

replica

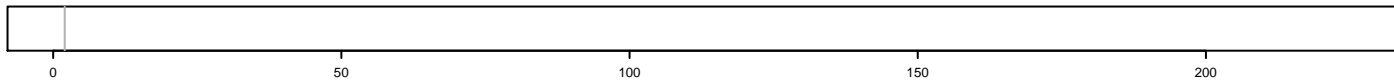

stability

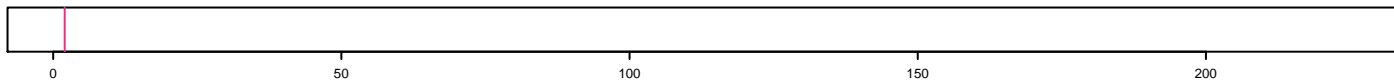

# Sorbitol dehydrogenase (Q00796)

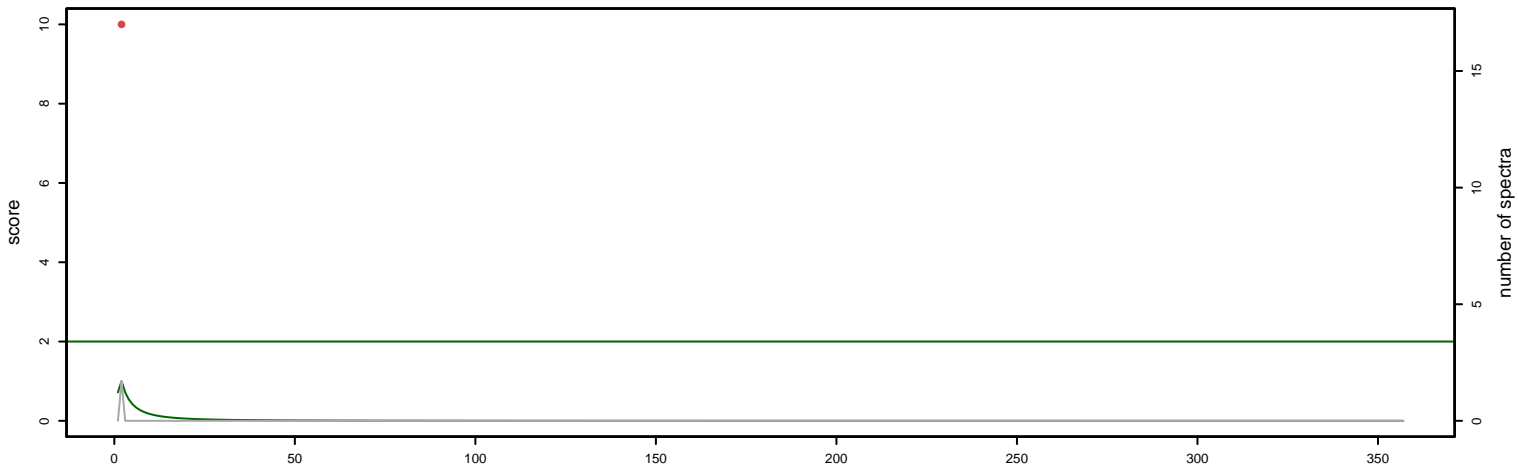

replica

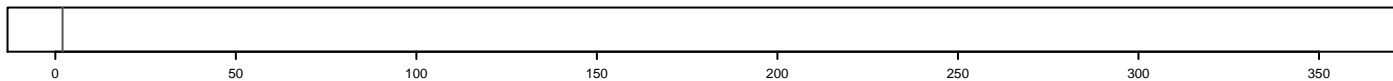

stability

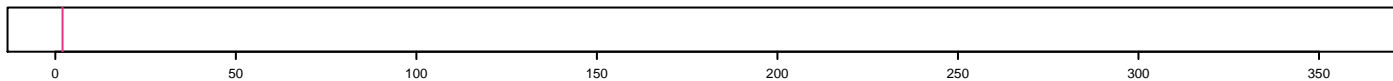

# AMP deaminase 3 (Q01432-3)

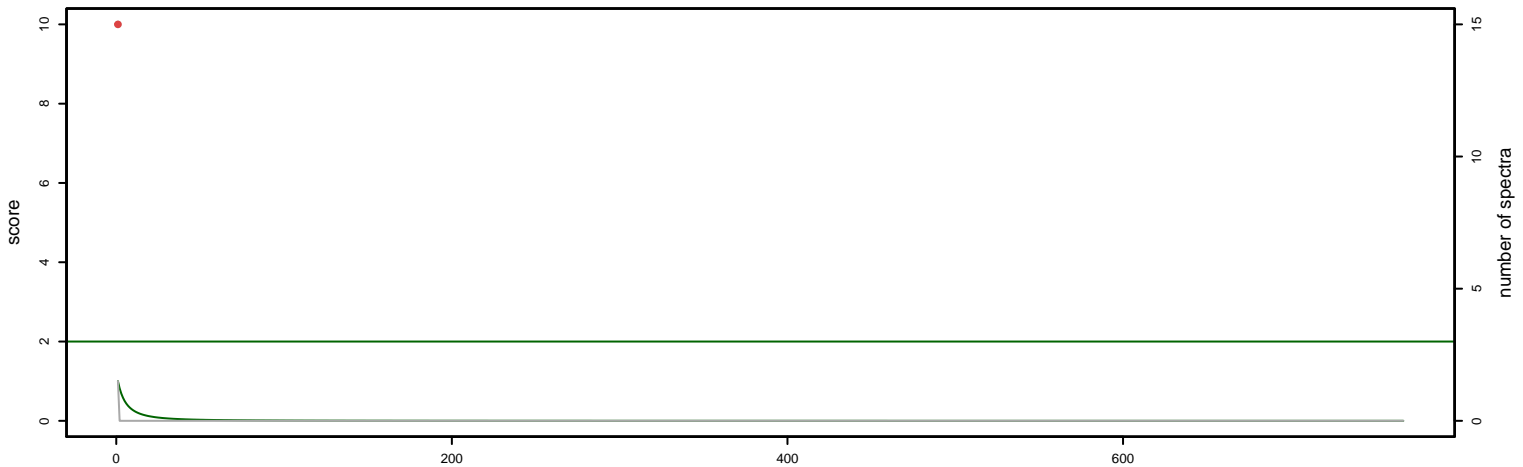

replica

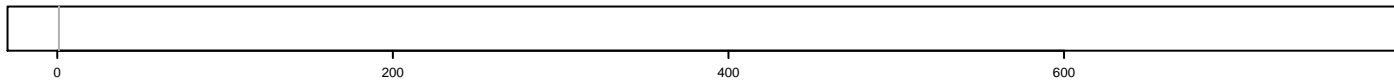

stability

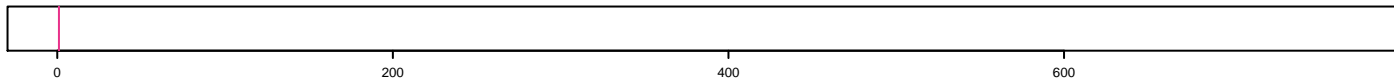

### Fatty acid-binding protein, epidermal (Q01469)

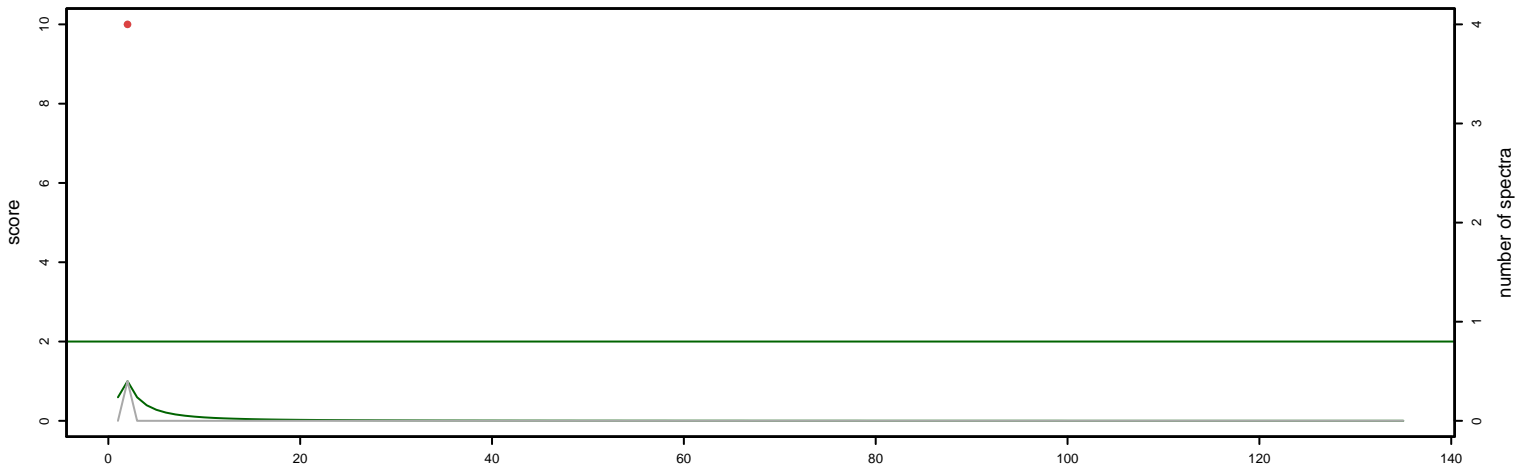

replica

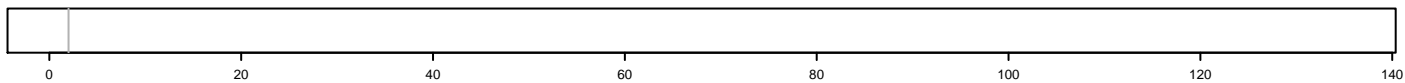

stability

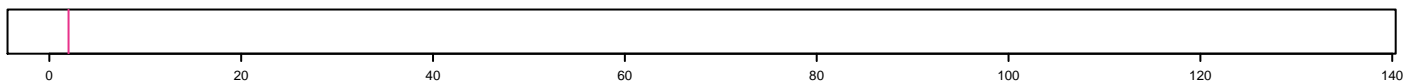

# Adenylyl cyclase-associated protein 1 (Q01518)

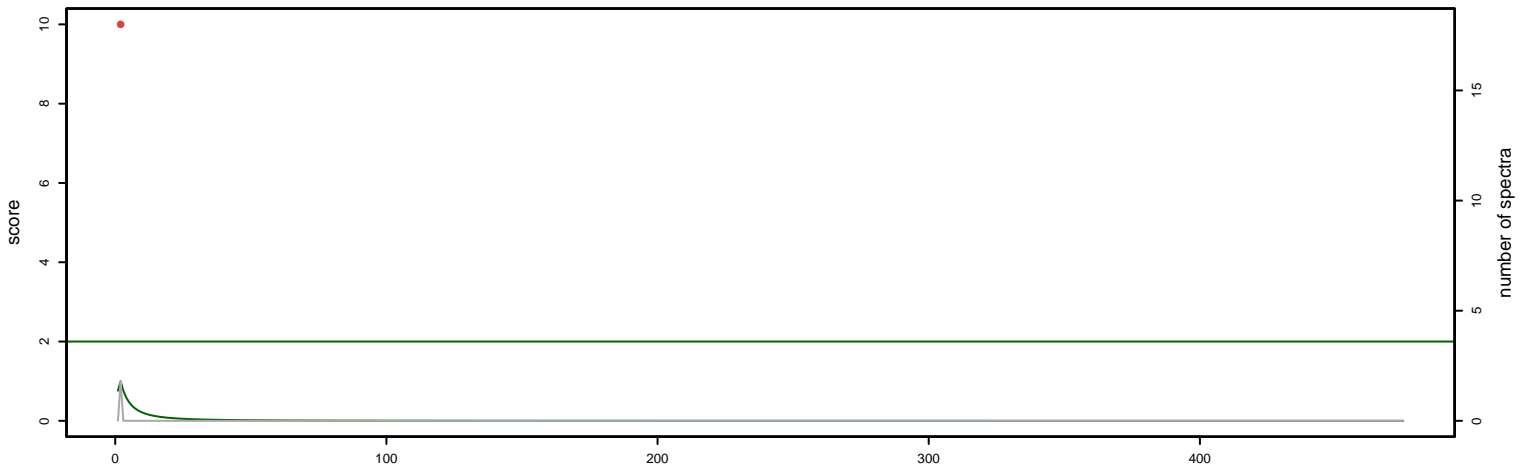

replica

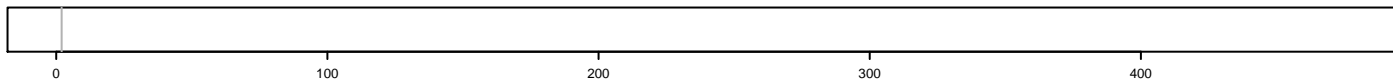

stability

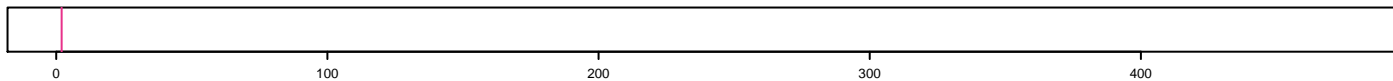

# Peptidyl-prolyl cis-trans isomerase FKBP4 (Q02790)

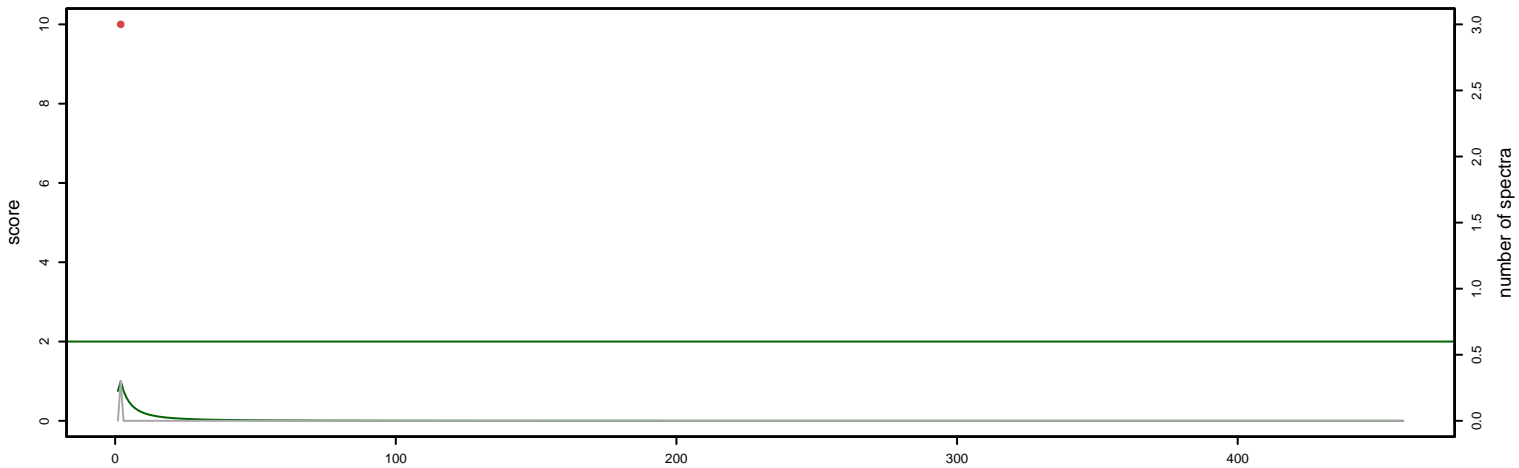

replica

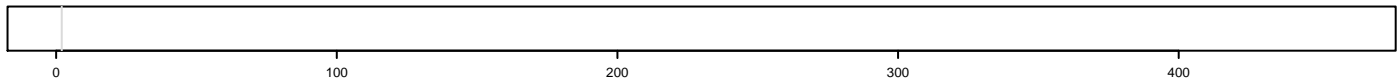

stability

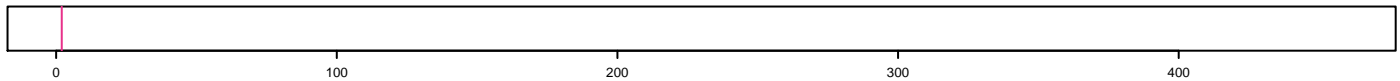

# UBX domain-containing protein 1 (Q04323)

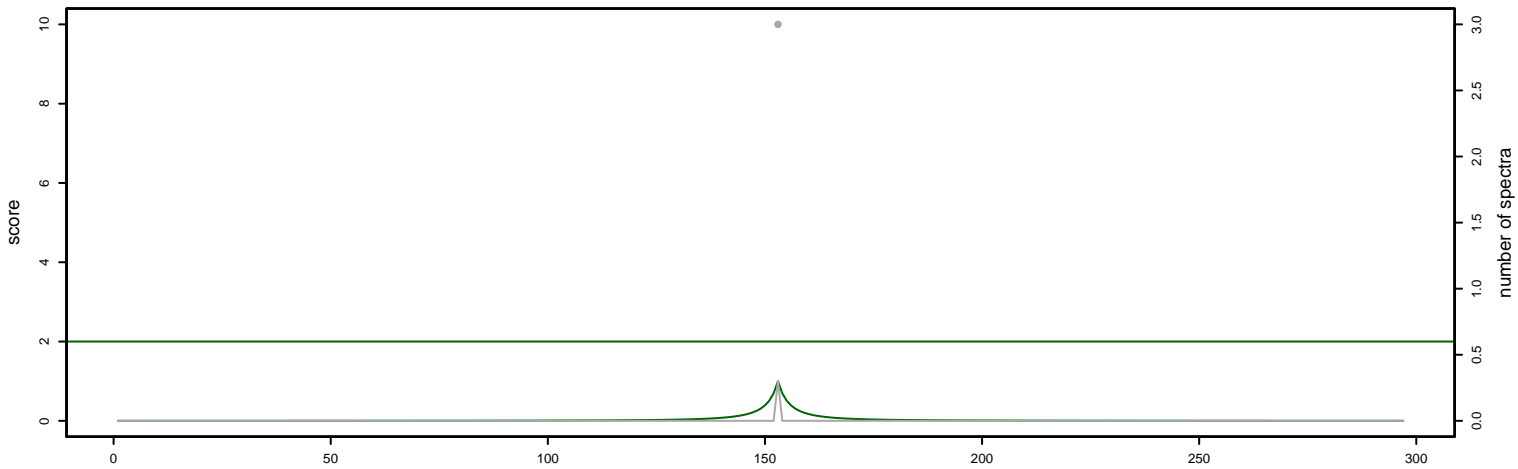

replica

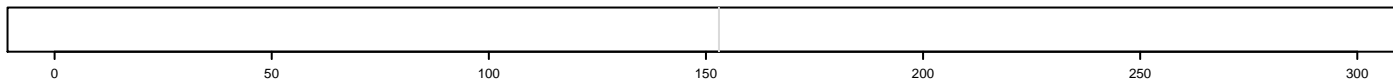

stability

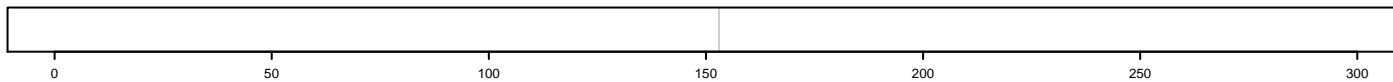



# 1,4-alpha-glucan-branching enzyme (Q04446)

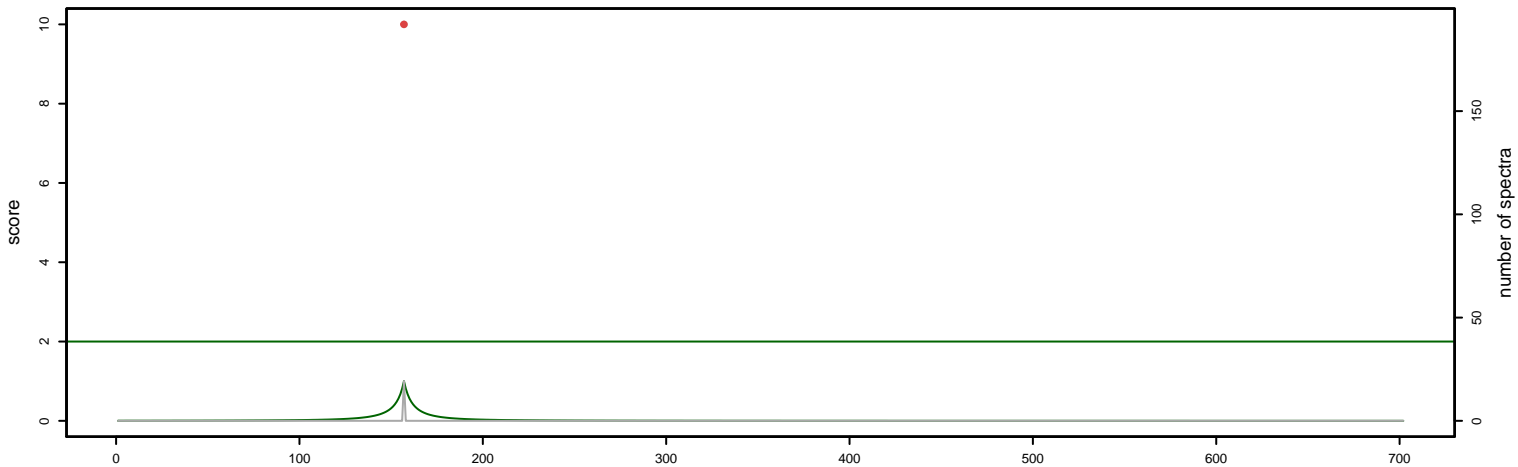

replica

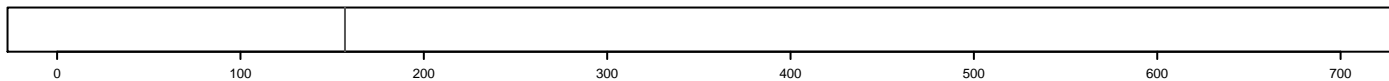

stability

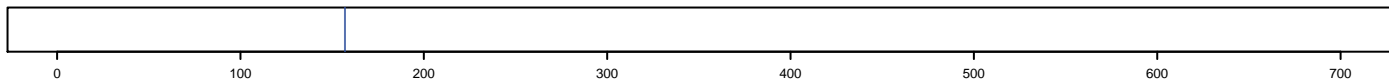

# Transducin-like enhancer protein 1 (Q04724)

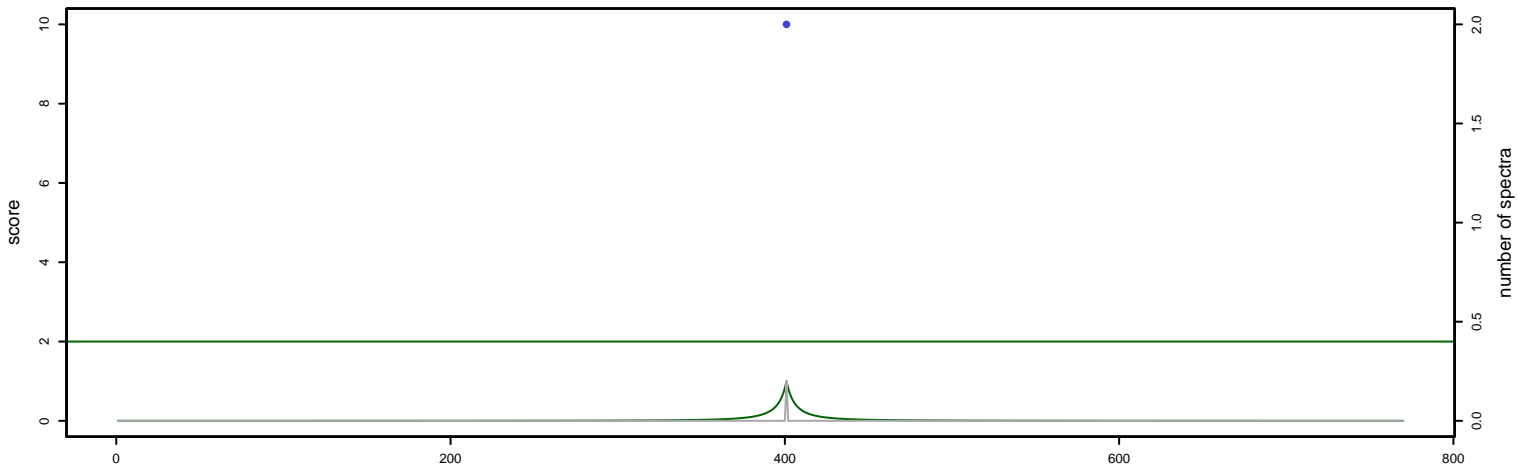

replica

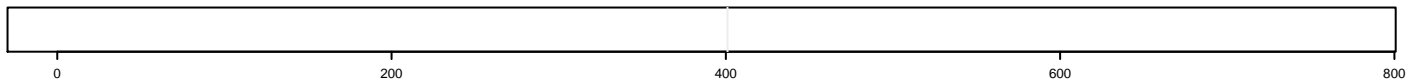

stability

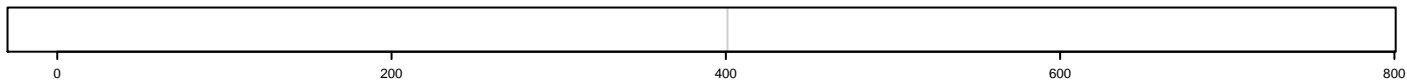

# Lactoylglutathione lyase (Q04760)

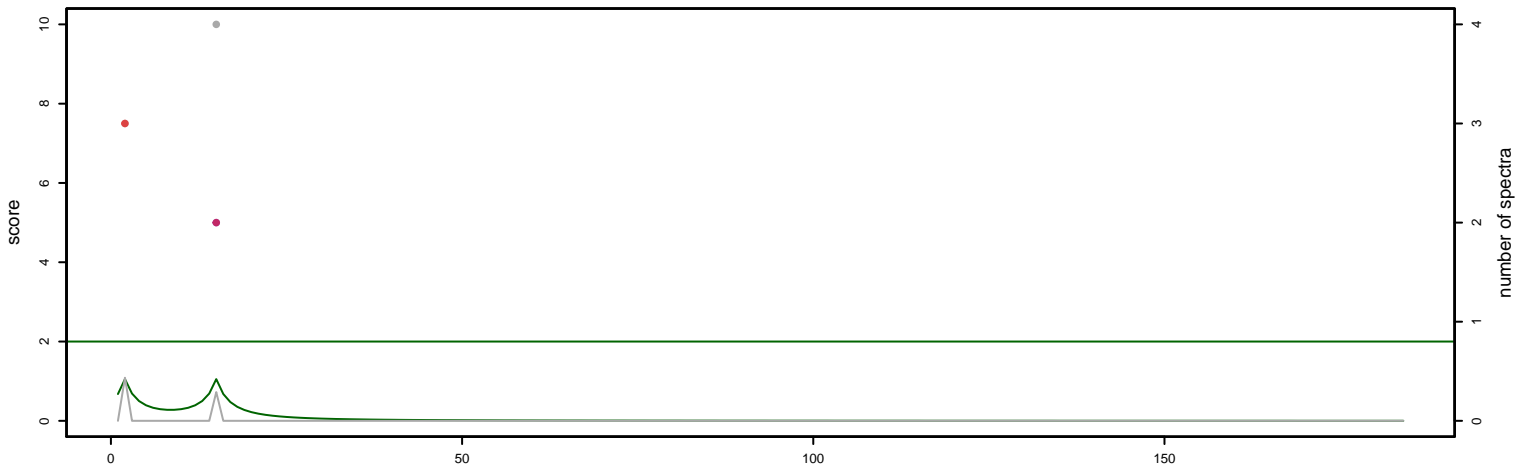

replica

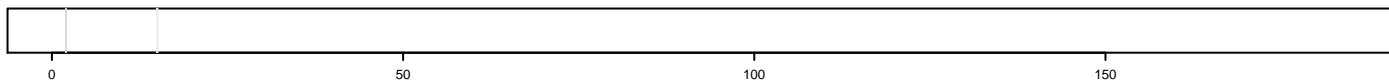

stability

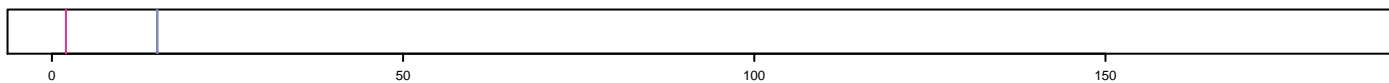

# Proteasome activator complex subunit 1 (Q06323)

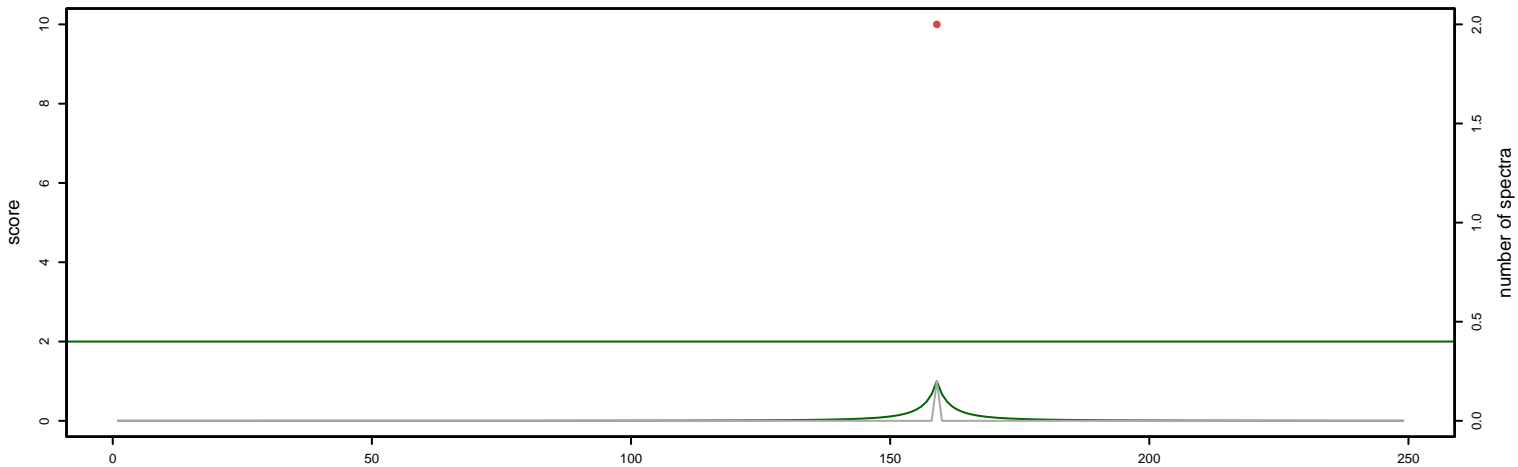

replica

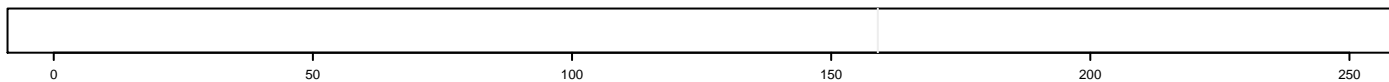

stability

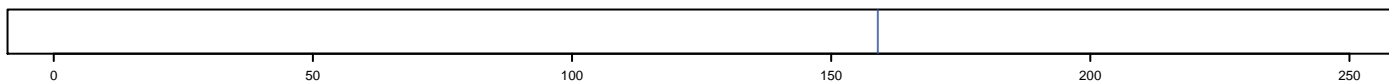

### Peroxiredoxin-1 (Q06830)

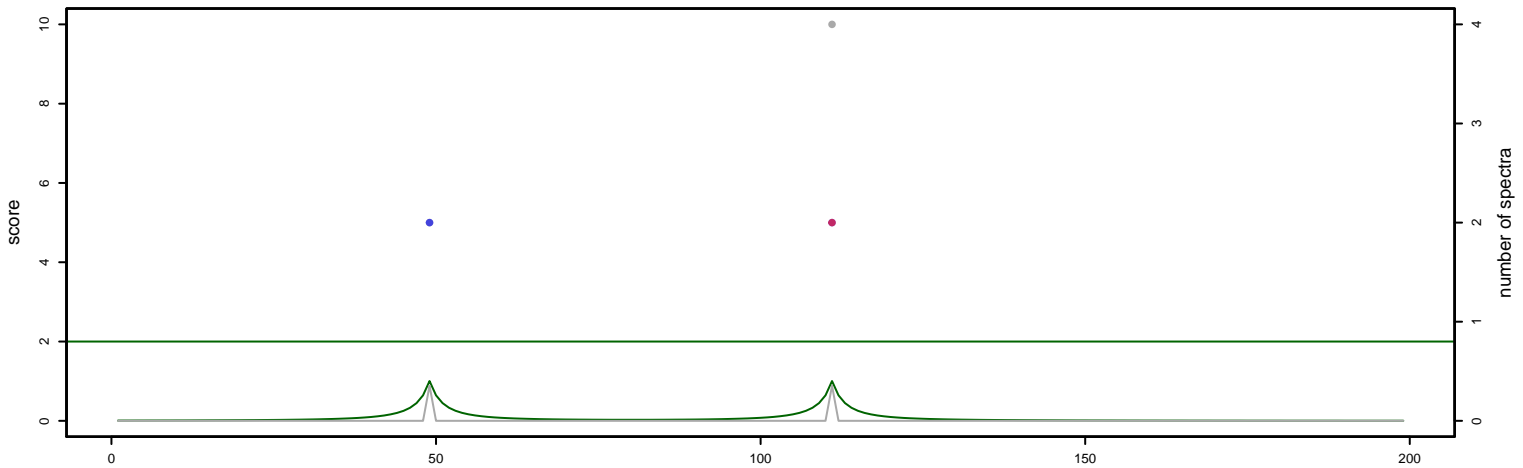

replica

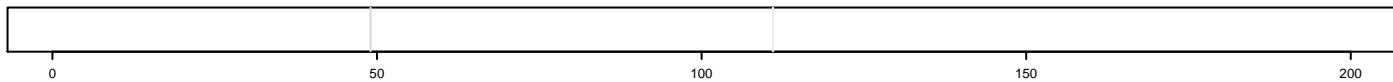

stability

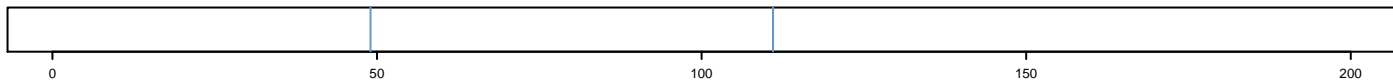

### Dematin (Q08495)

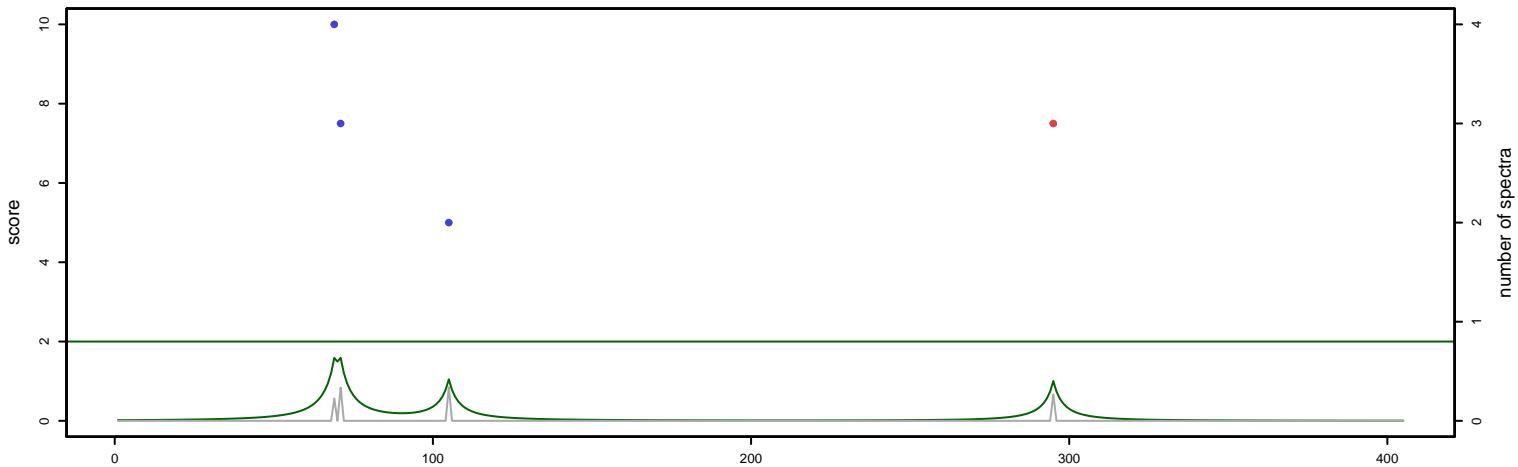

### replica

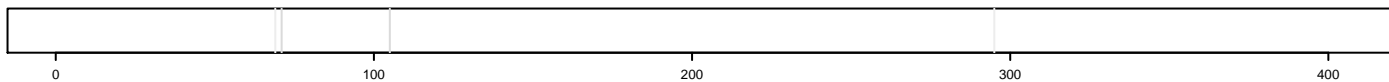

### stability

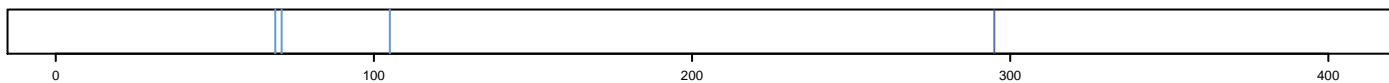

### Histone-binding protein RBBP4 (Q09028)

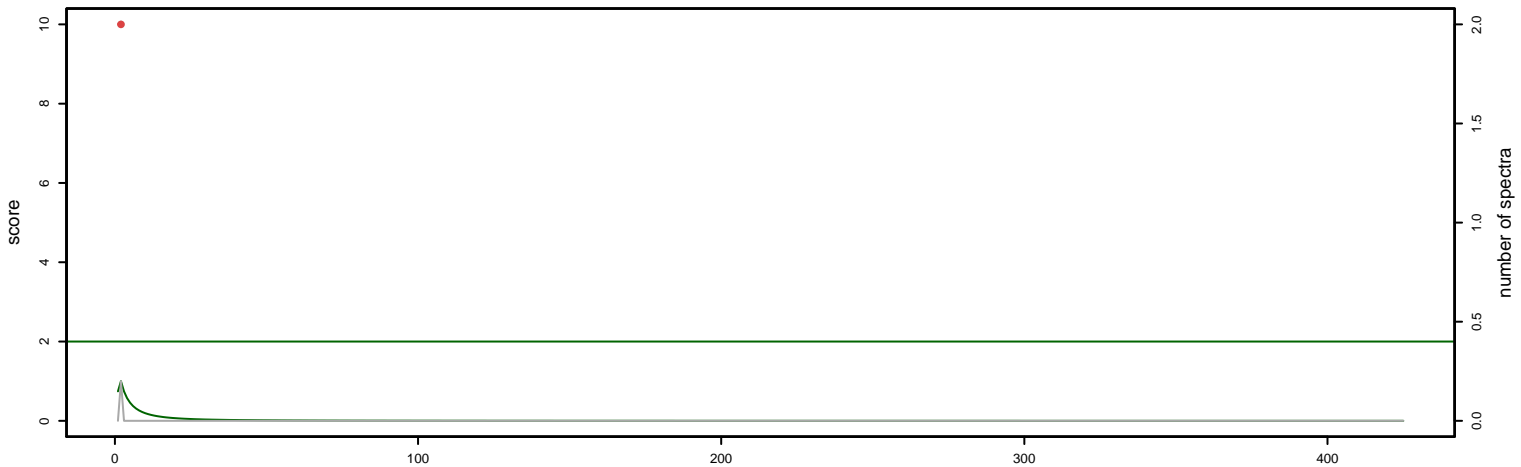

replica

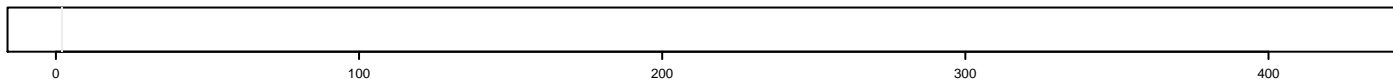

stability

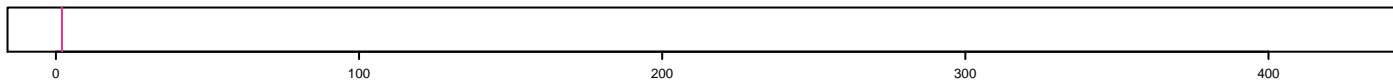

### Secernin-1 (Q12765)

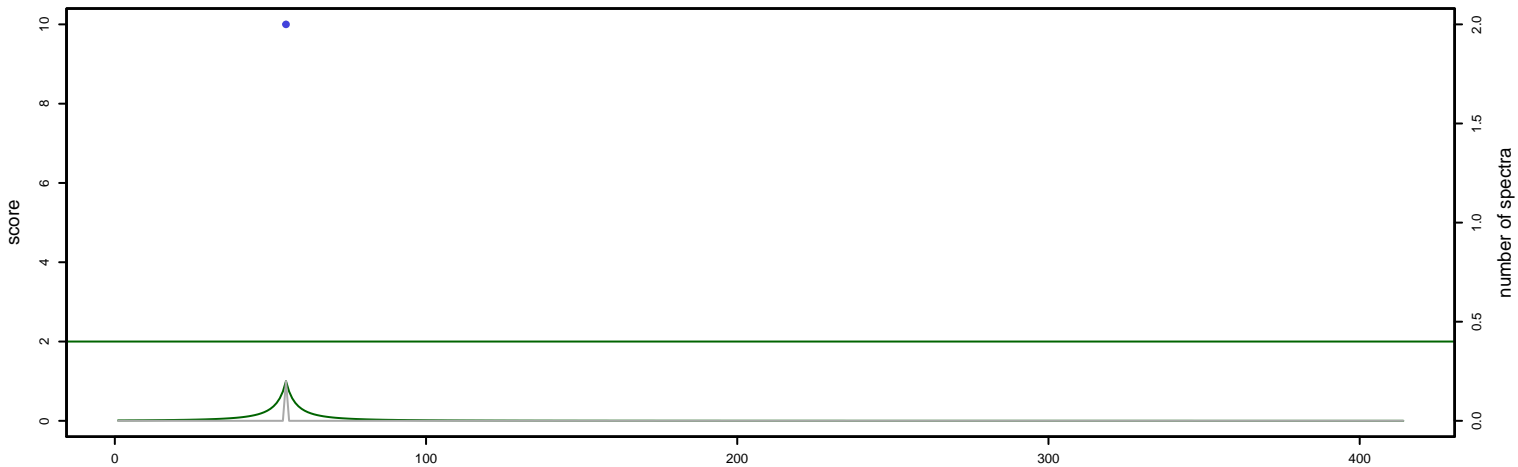

replica

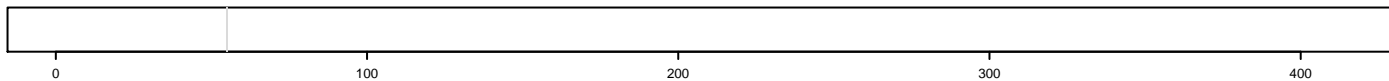

stability

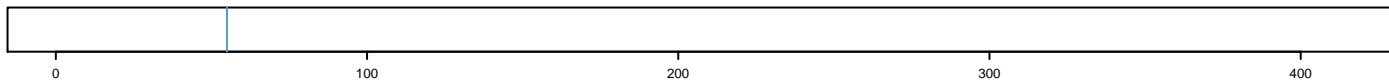



### Twinfilin-1 (Q12792)

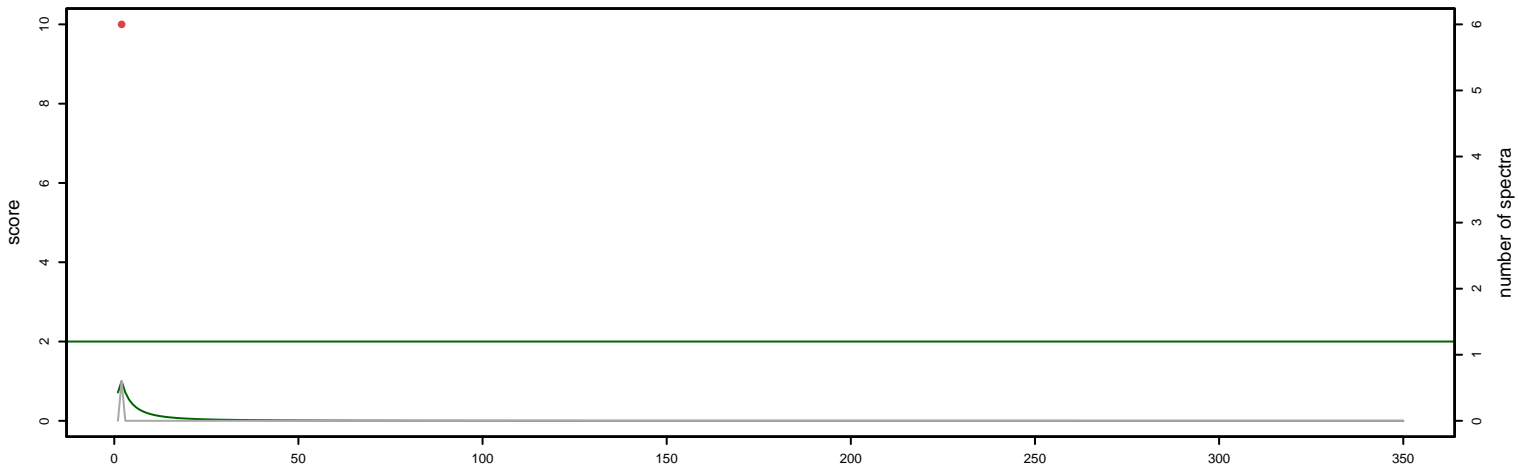

replica

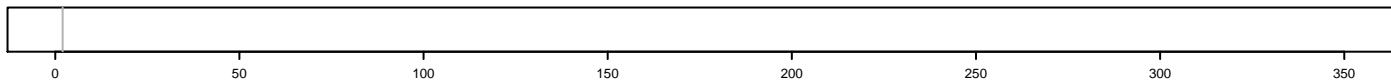

stability

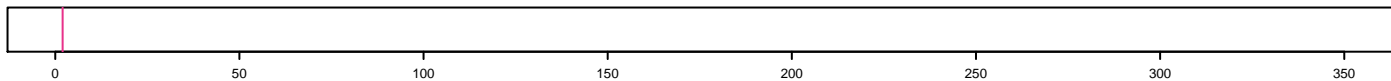

# Vesicle transport protein SEC20 (Q12981)

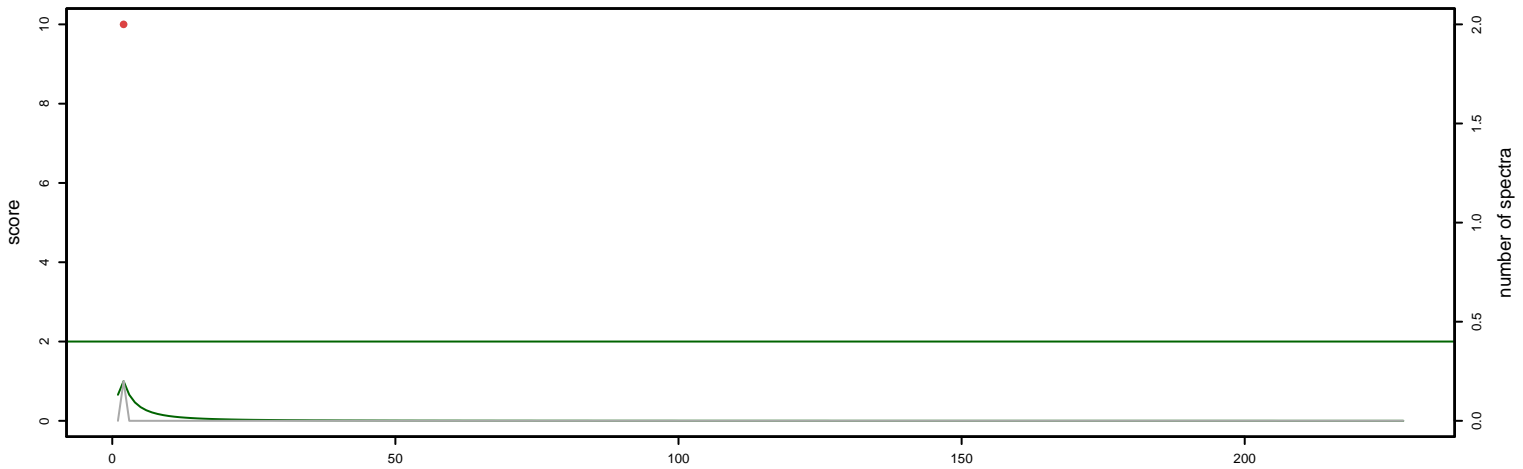

replica

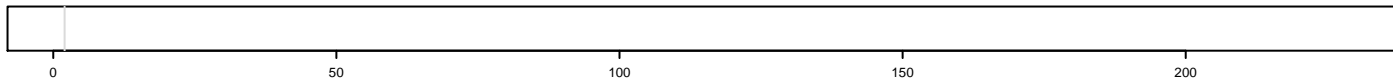

stability

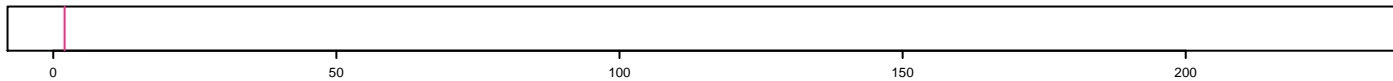

# Bifunctional coenzyme A synthase (Q13057)

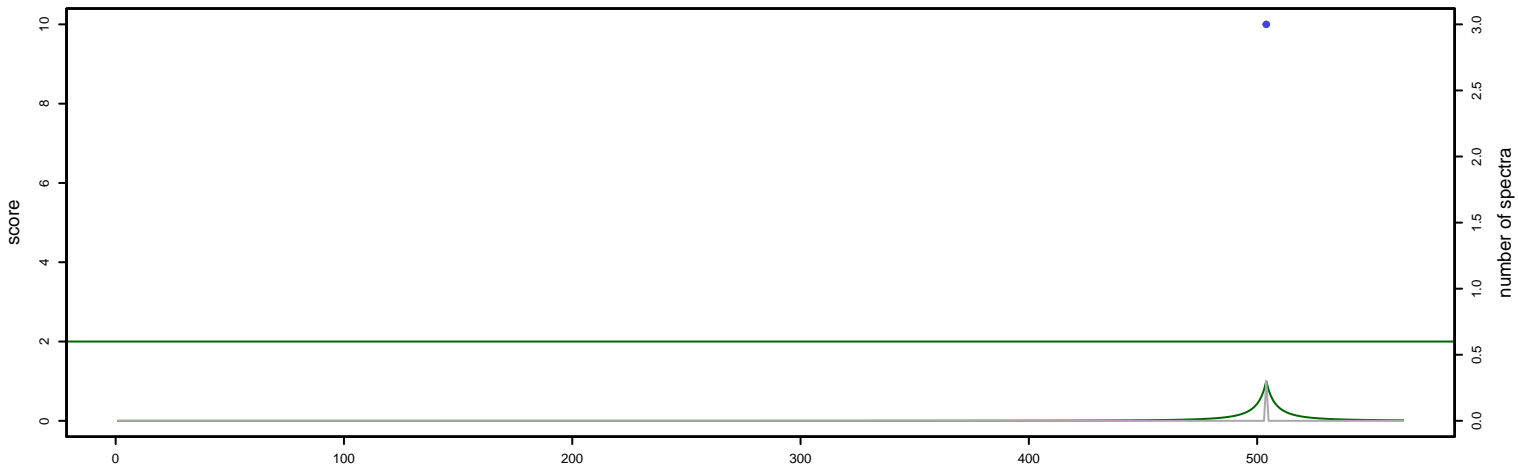

replica

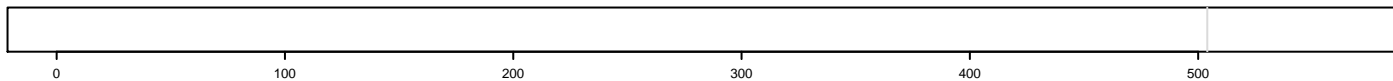

stability

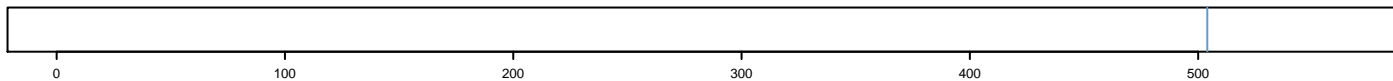

# COP9 signalosome complex subunit 1 (Q13098)

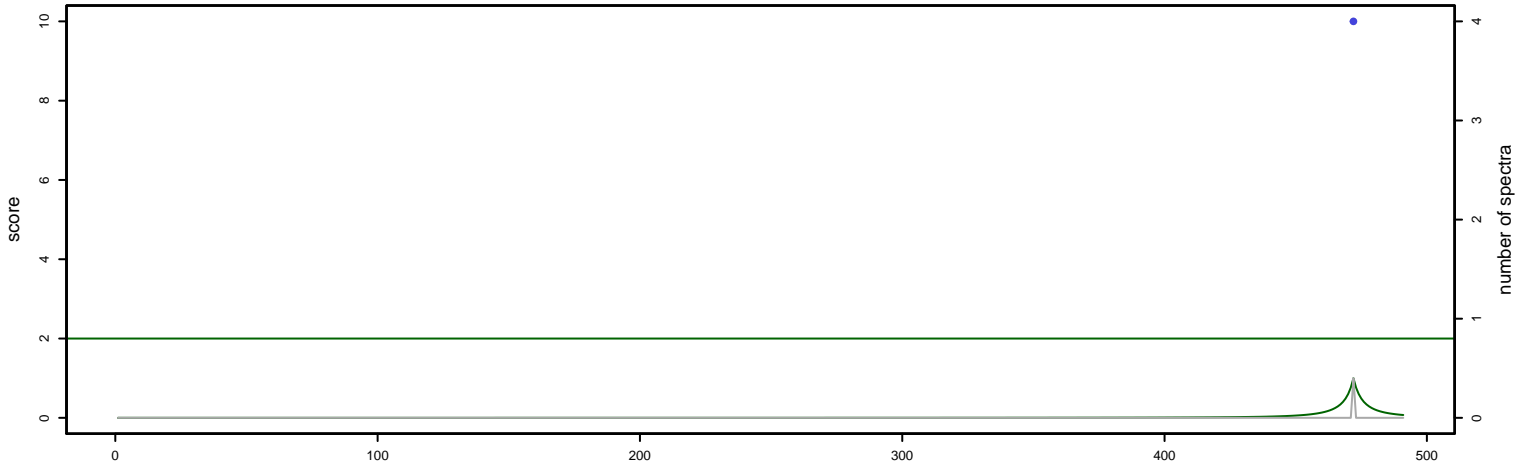

replica

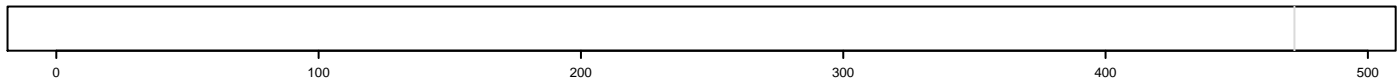

stability

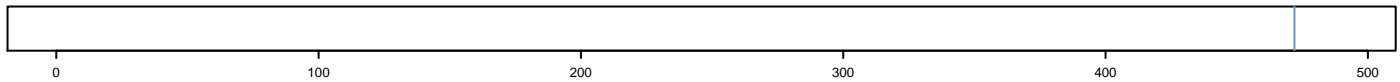

### Serine/threonine-protein kinase PAK 2 (Q13177)

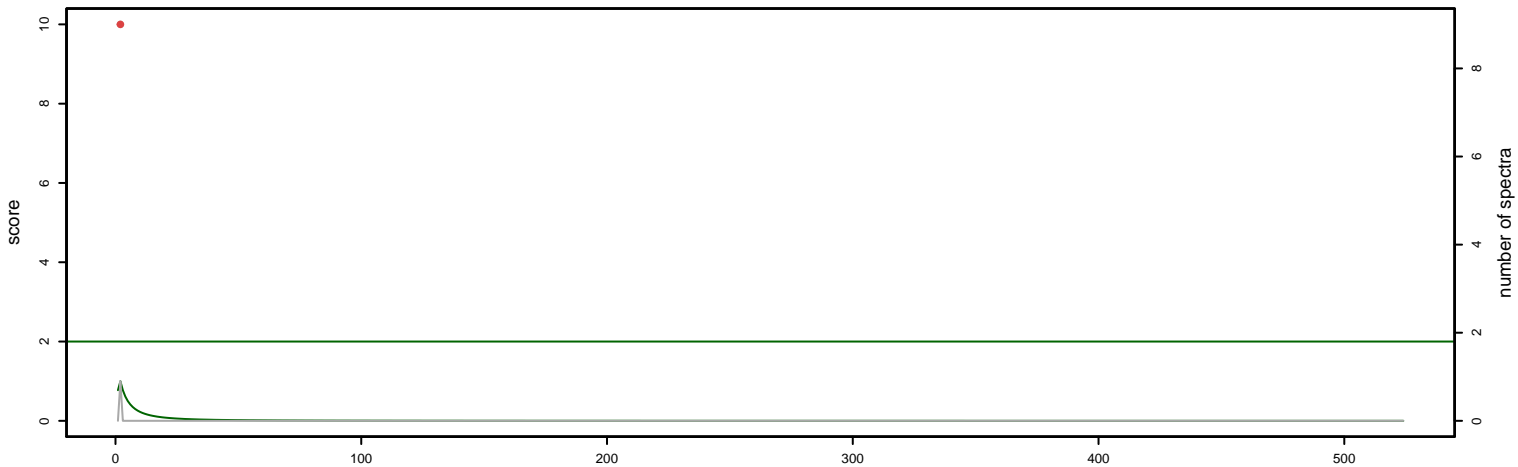

replica

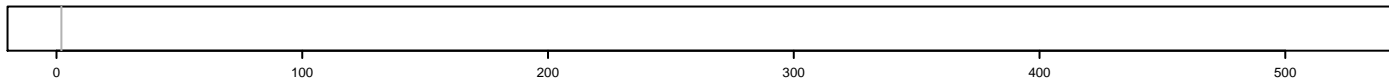

stability

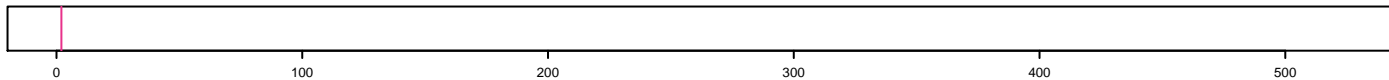

# Selenium-binding protein 1 (Q13228)

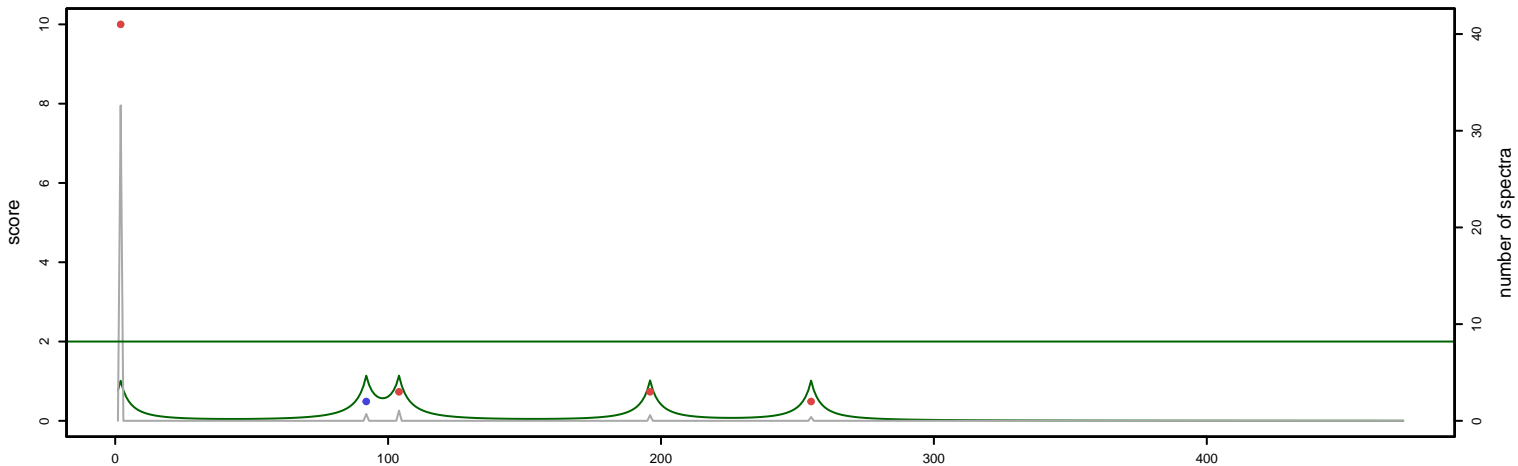

replica

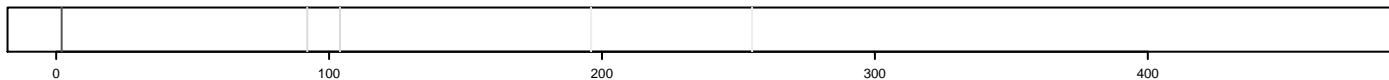

stability

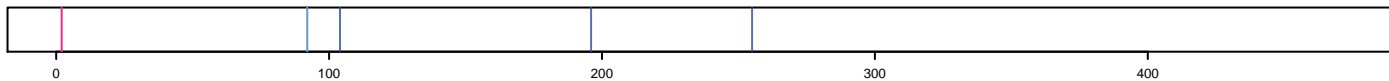

# Urea transporter 1 (Q13336)

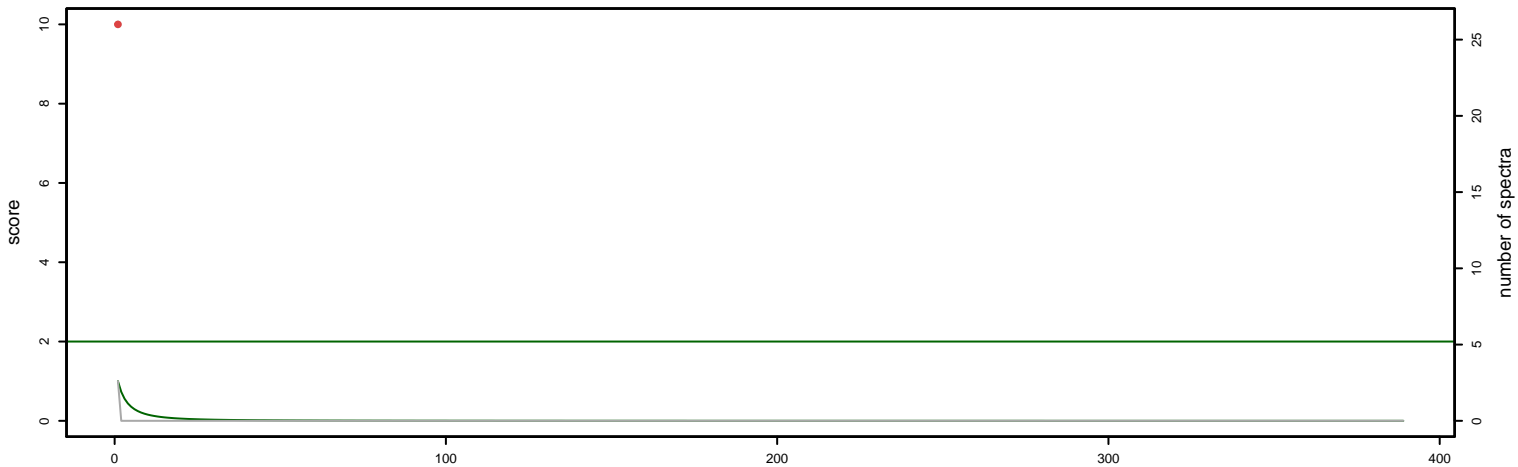

replica

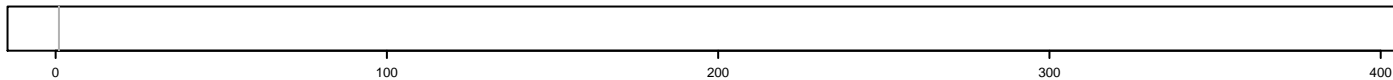

stability

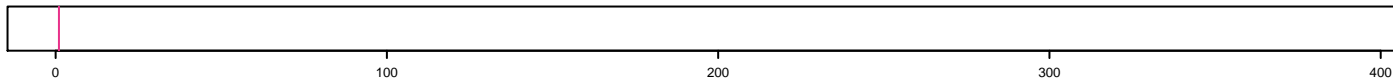

# Ubiquitin-conjugating enzyme E2 variant 1 (Q13404)

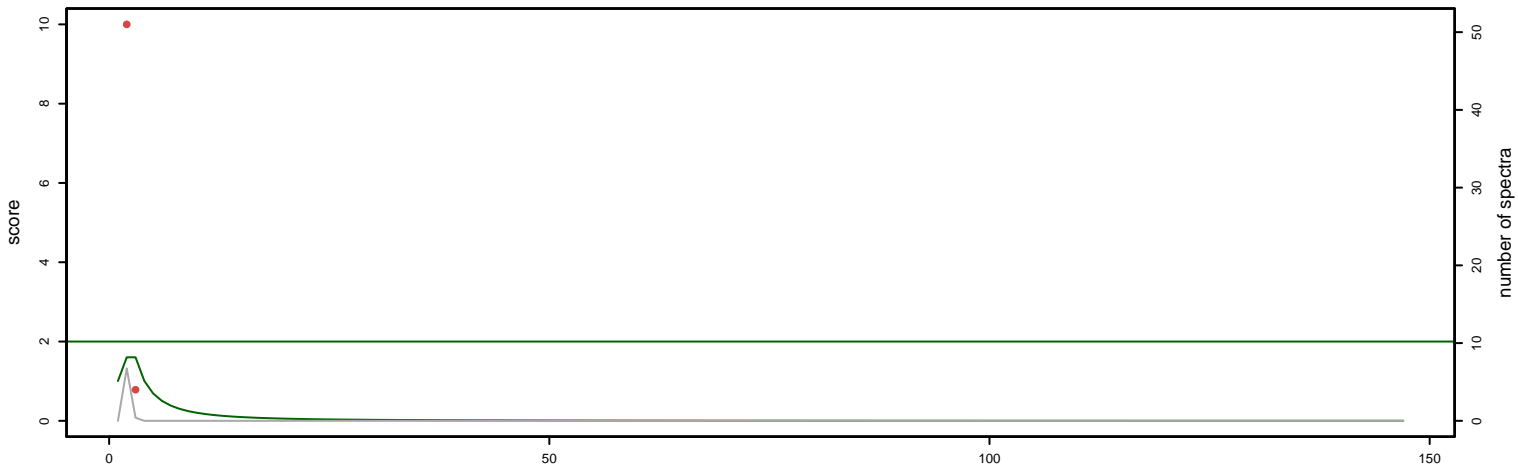

replica

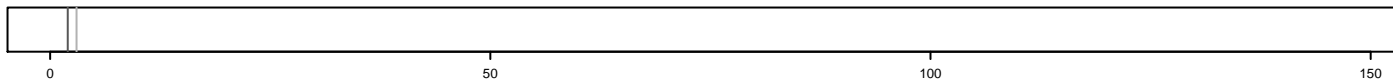

stability

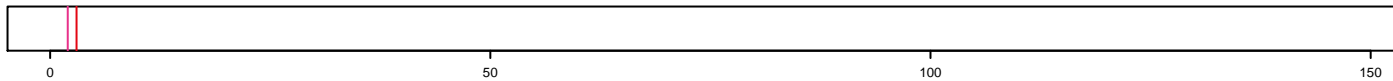



### Transmembrane emp24 domain-containing protein 1 (Q13445)

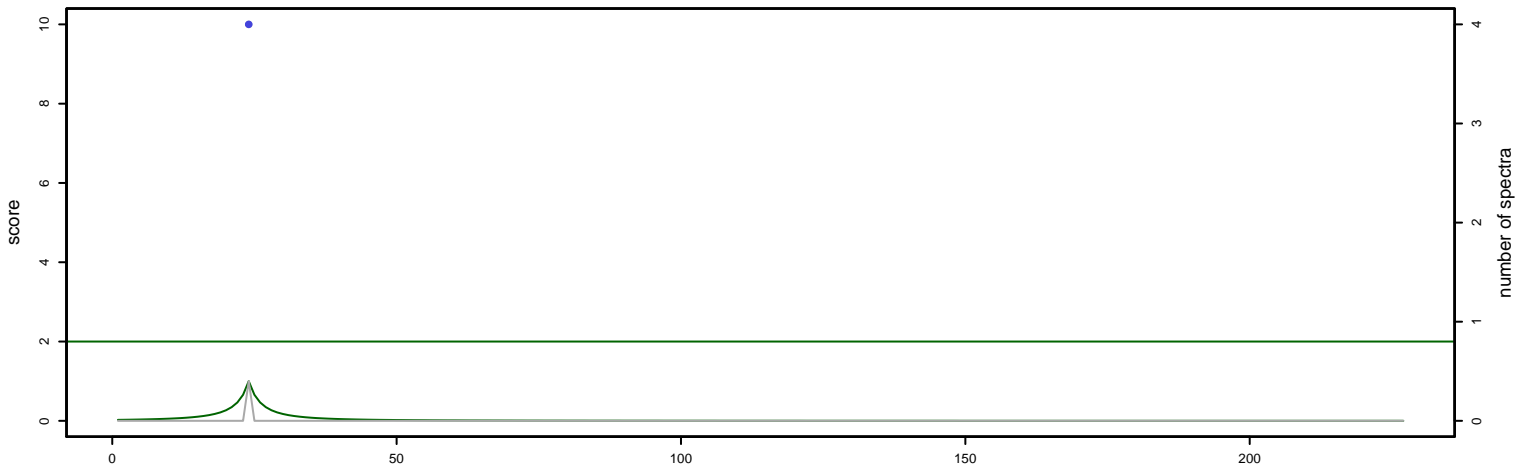

replica

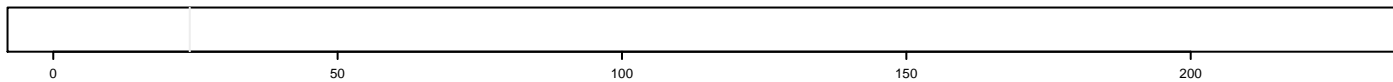

stability

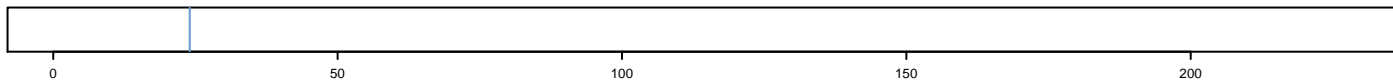

# Eukaryotic translation initiation factor 4E-binding protein 2 (Q13542)

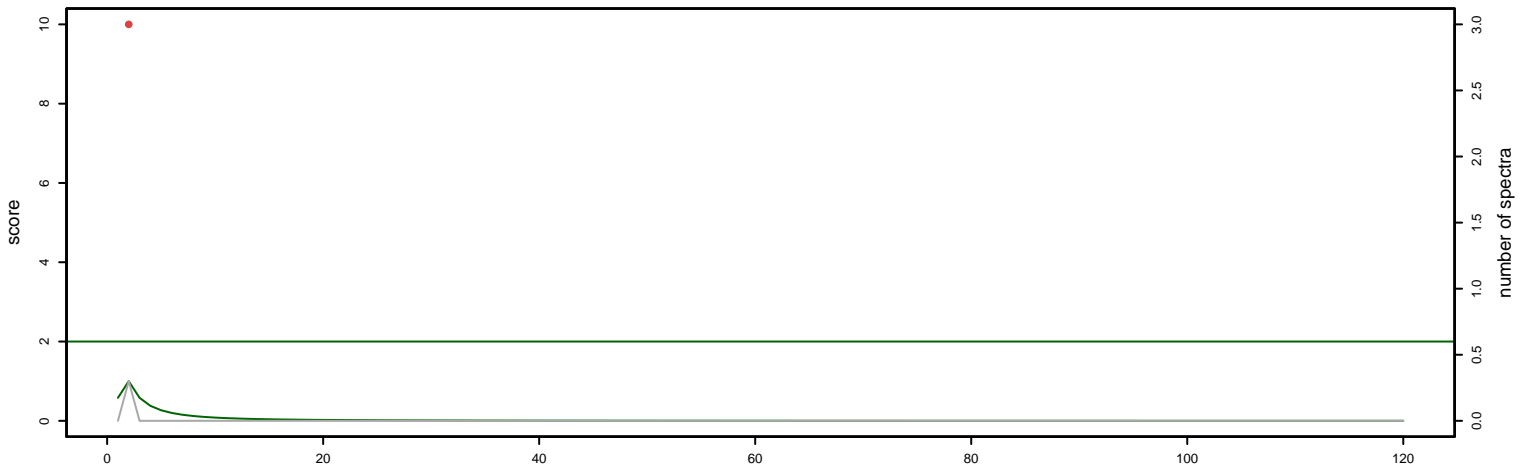

replica

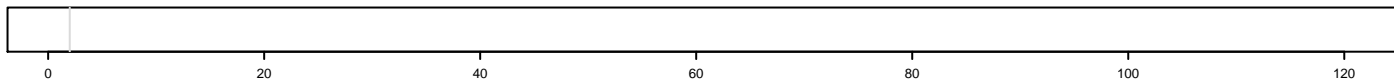

stability

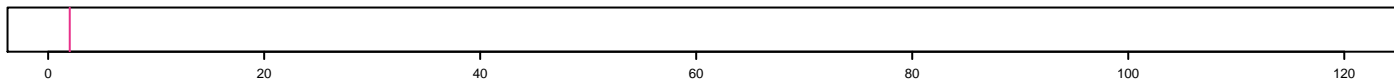

# NEDD8-activating enzyme E1 regulatory subunit (Q13564)

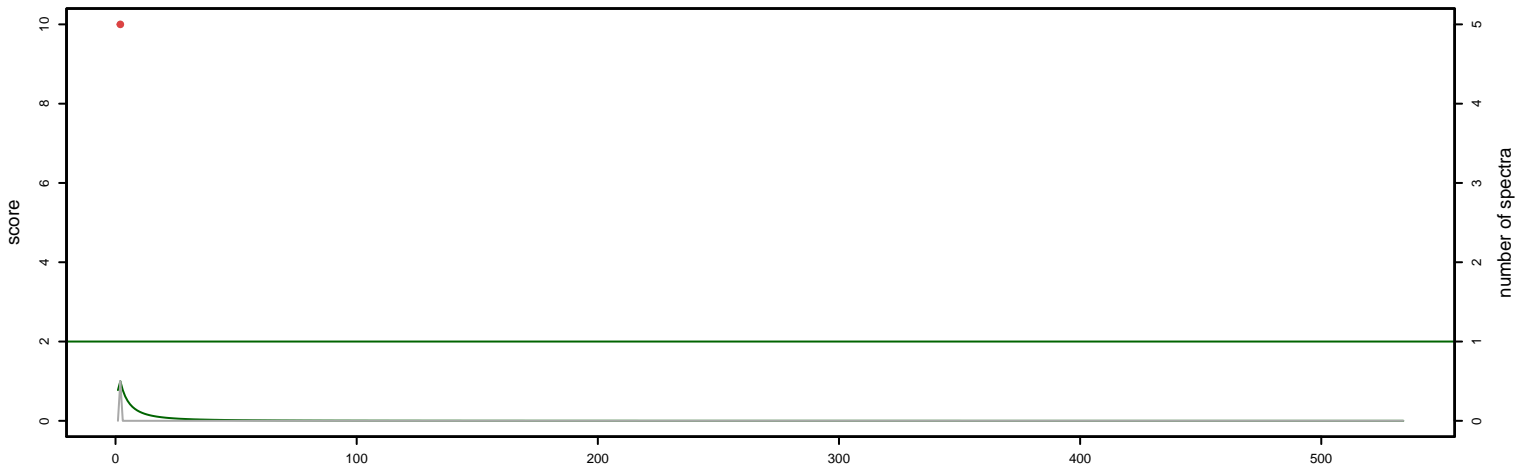

replica

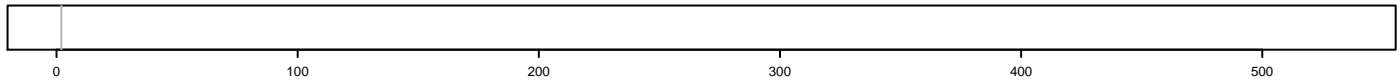

stability

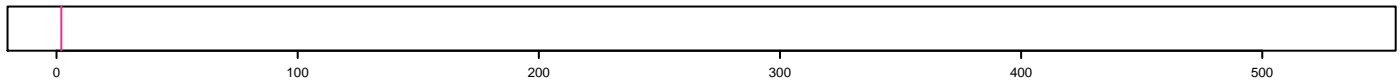

### Cullin-3 (Q13618)

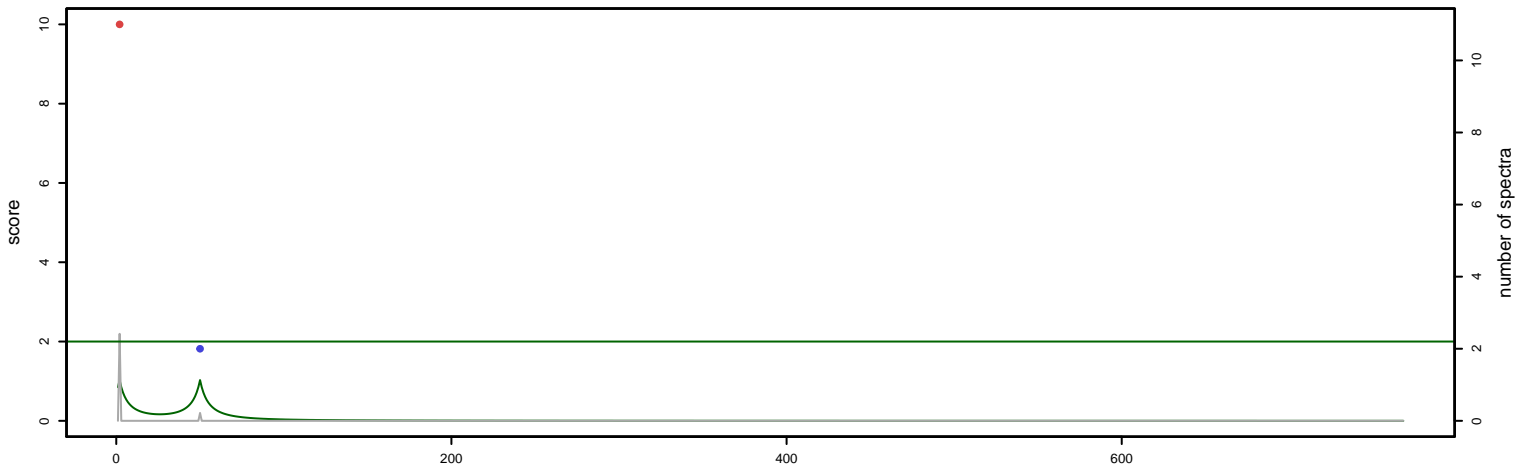

### replica

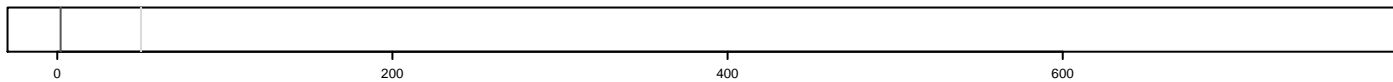

### stability

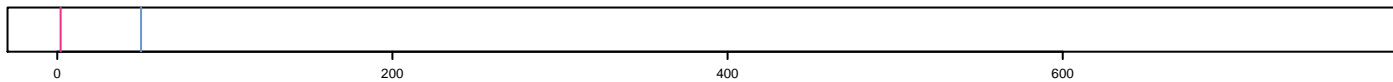

# GDP-L-fucose synthase (Q13630)

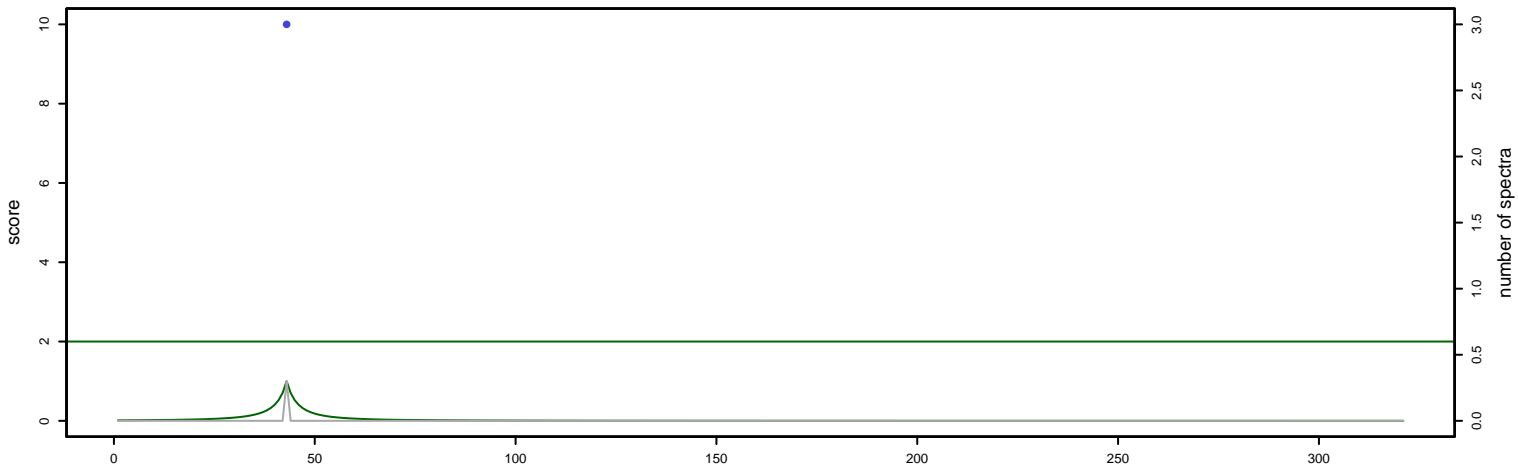

replica

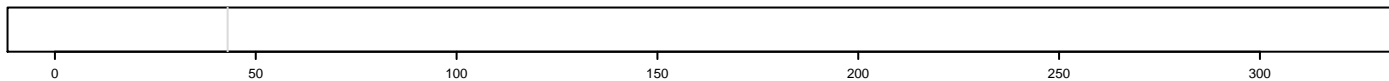

stability

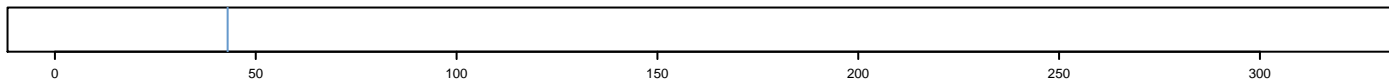

# Bleomycin hydrolase (Q13867)

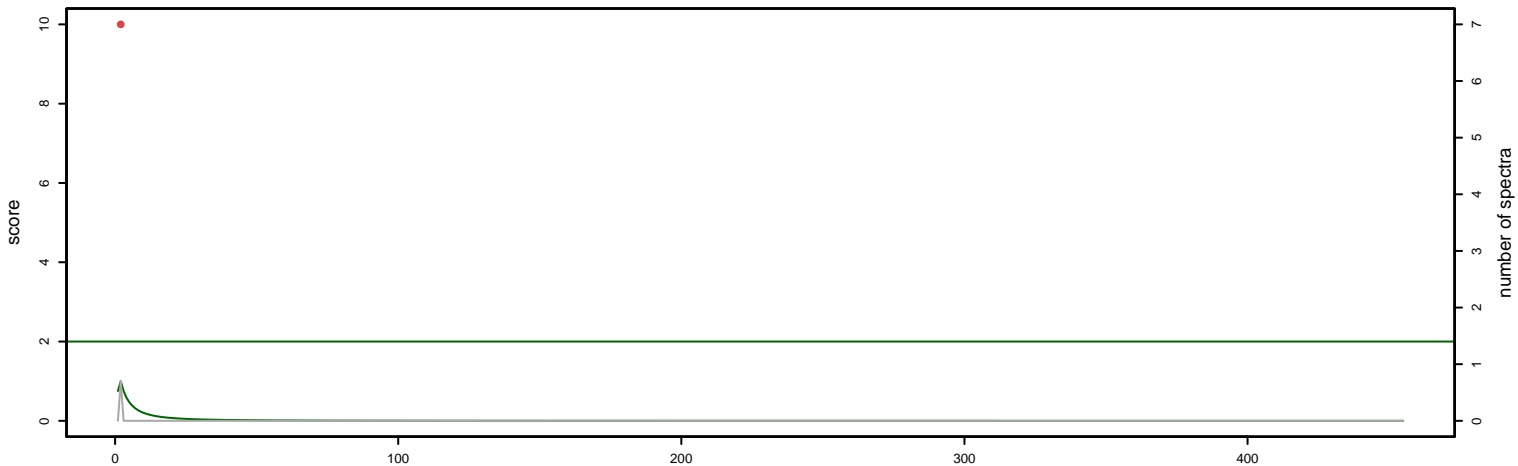

replica

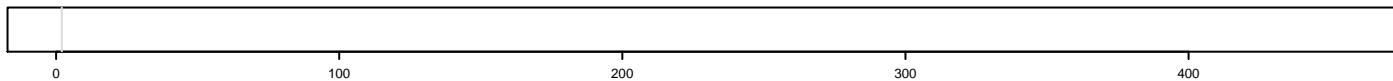

stability

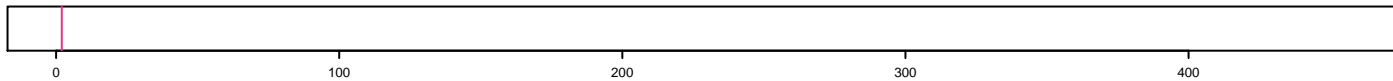

# Interleukin-18 (Q14116)

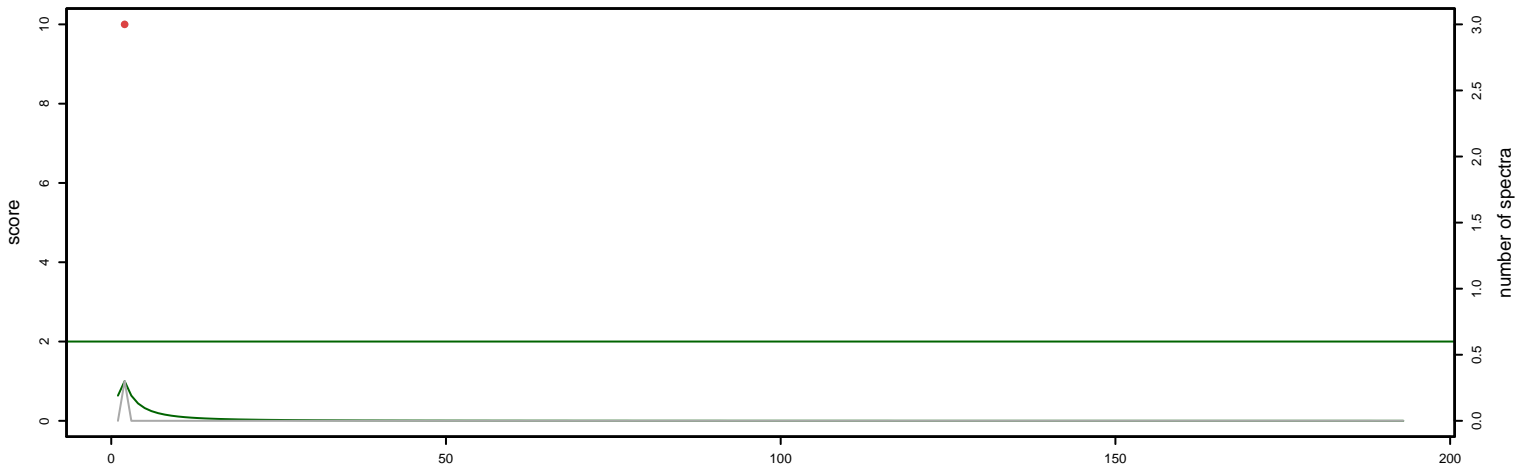

## replica

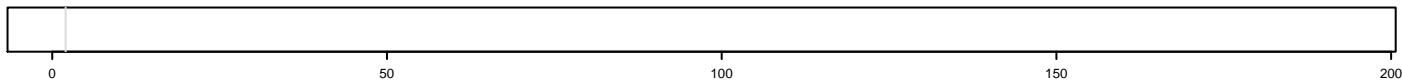

## stability

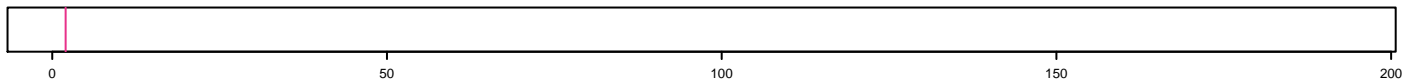

### Tubulin--tyrosine ligase-like protein 12 (Q14166)

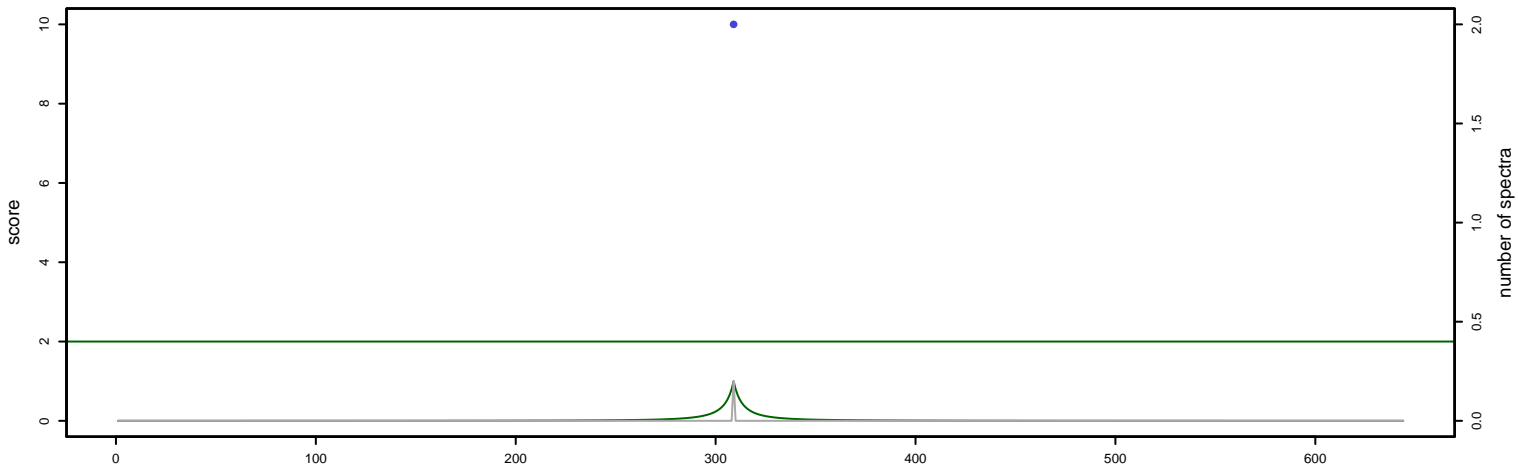

replica

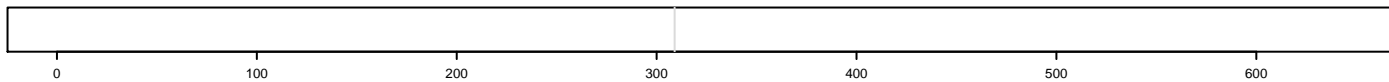

stability

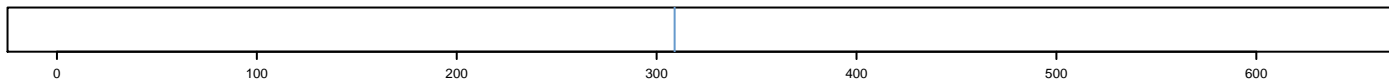



### Dihydropyrimidinase-related protein 3 (Q14195)

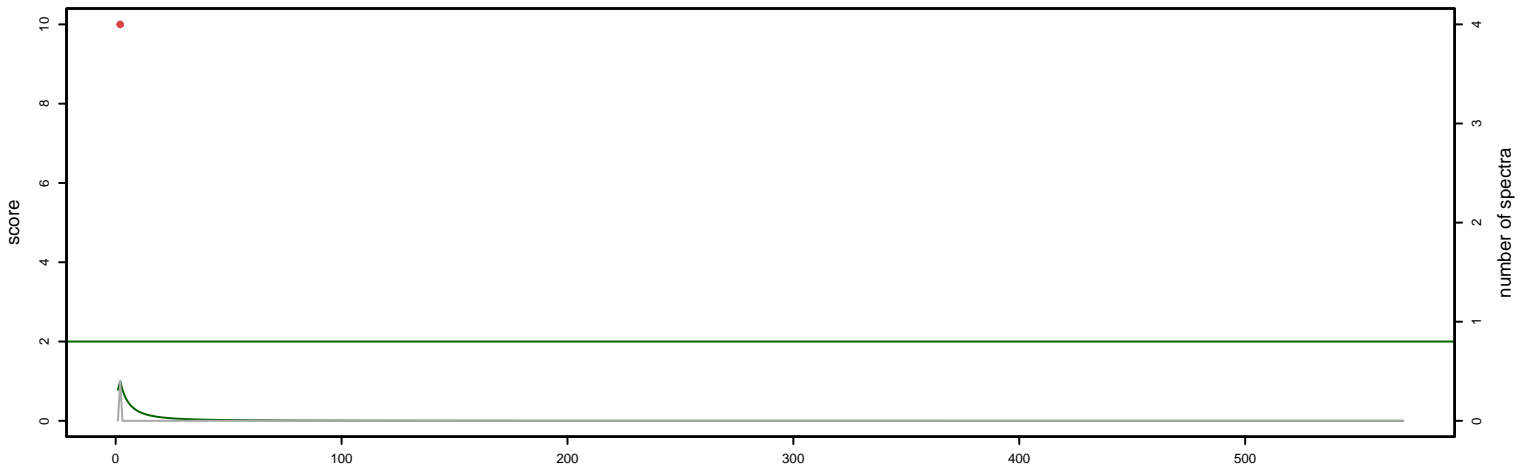

replica

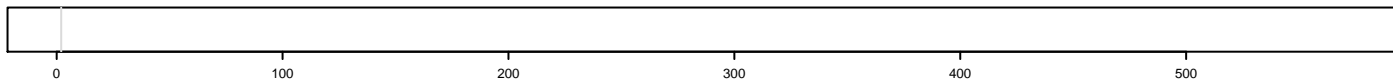

stability

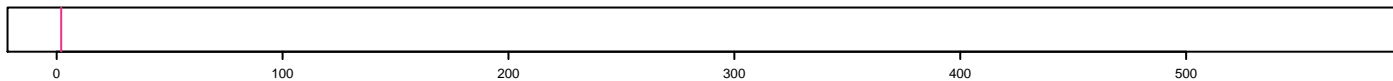

# Eukaryotic initiation factor 4A-II (Q14240)

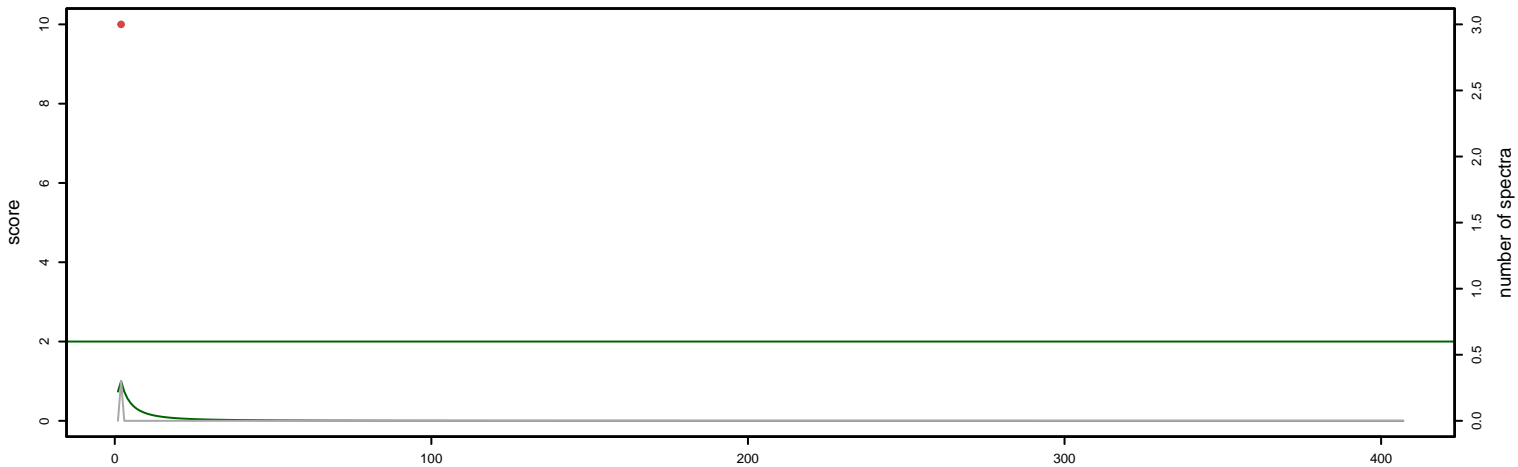

**replica**

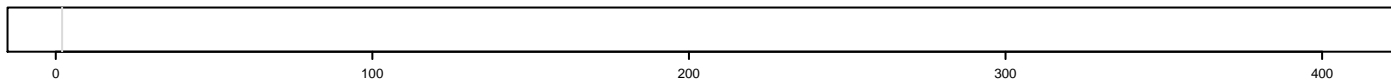

**stability**

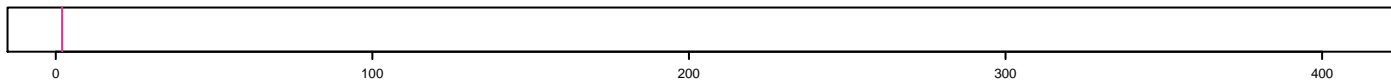

# Eukaryotic initiation factor 4A-II (Q14240-2)

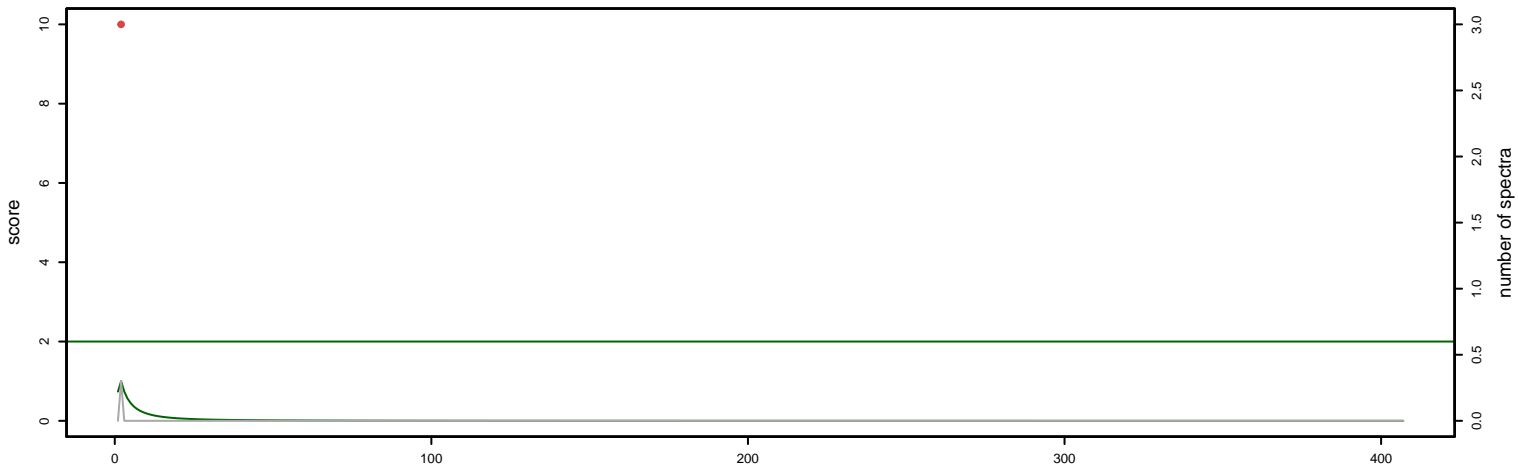

replica

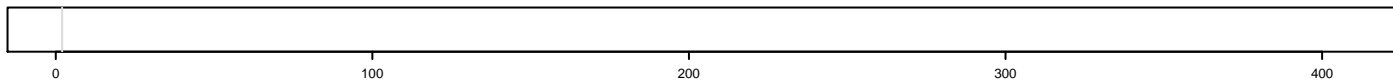

stability

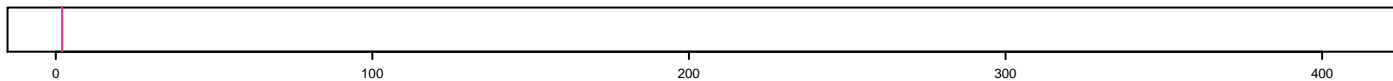

### Flotillin-2 (Q14254)

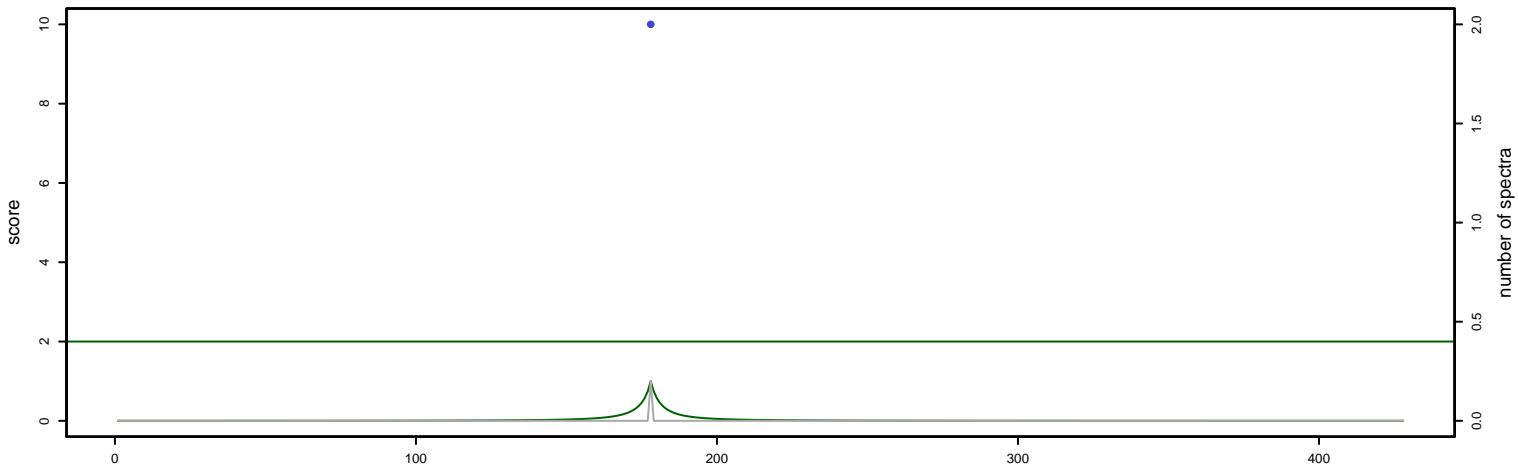

replica

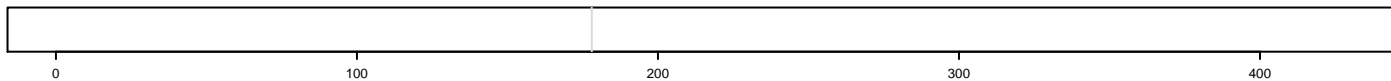

stability

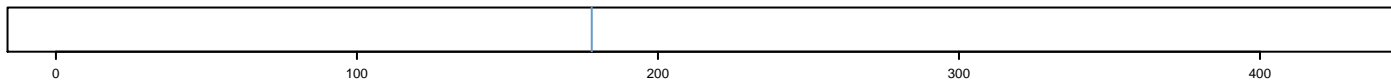

# Protein FAM50A (Q14320)

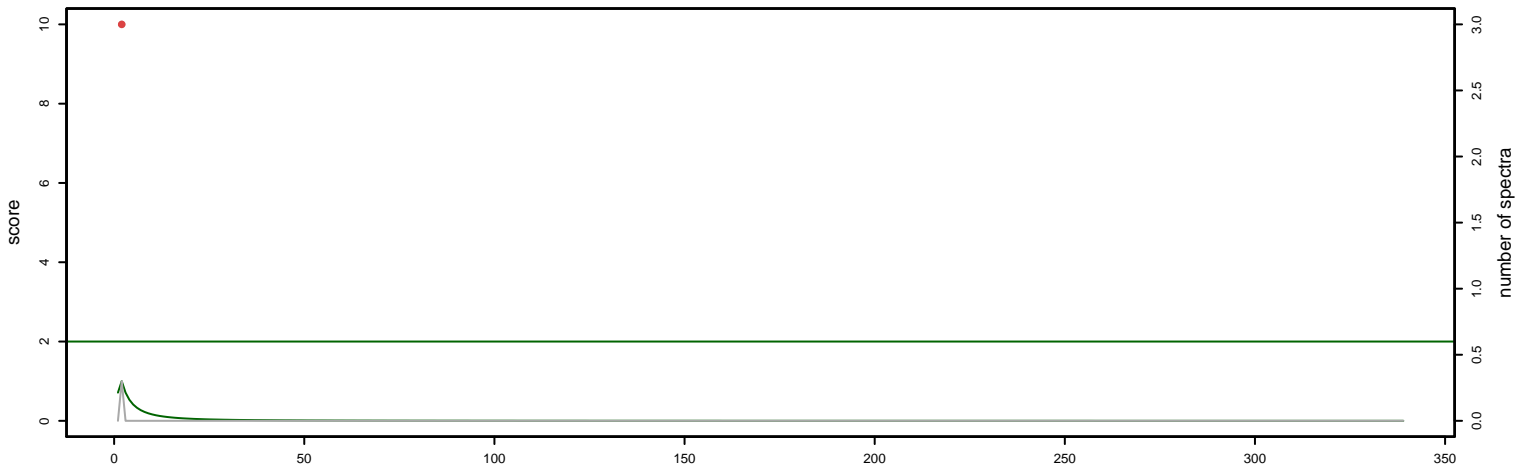

replica

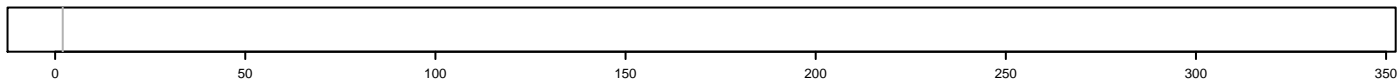

stability

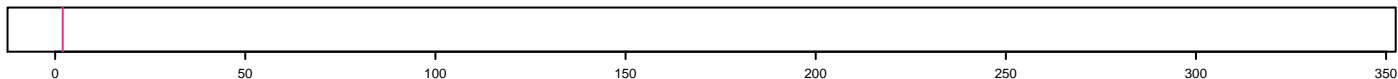

# Plastin-1 (Q14651)

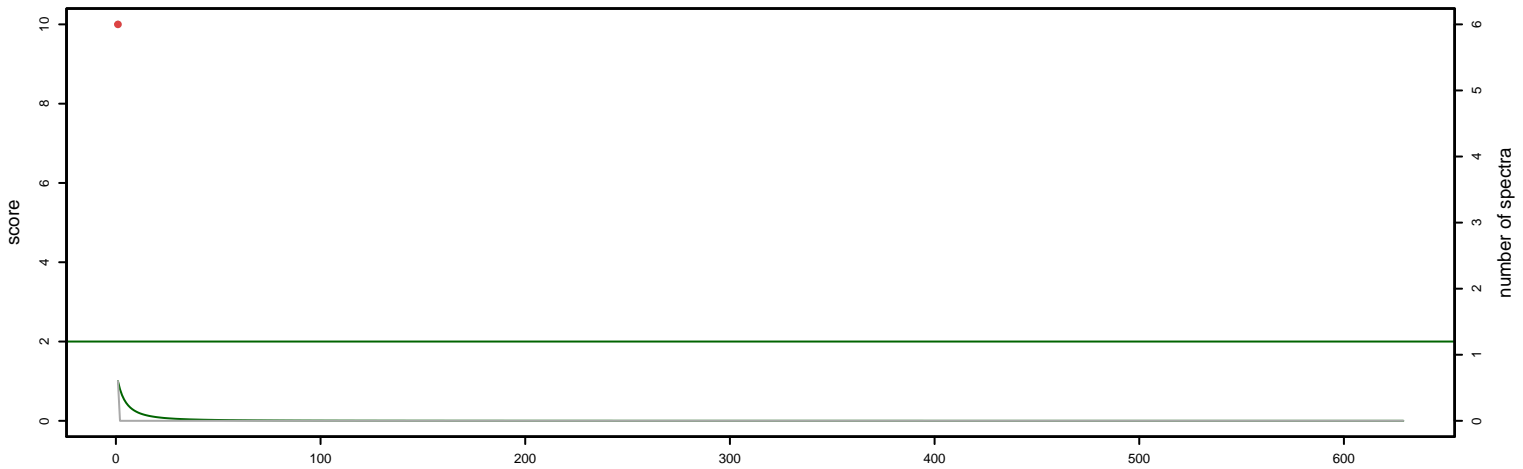

## replica

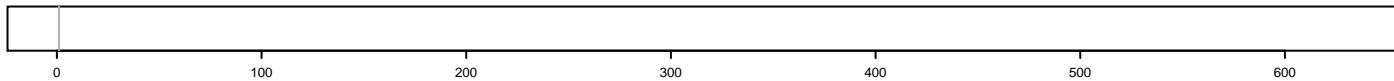

## stability

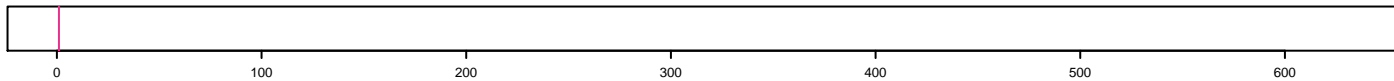

# LIM and SH3 domain protein 1 (Q14847)

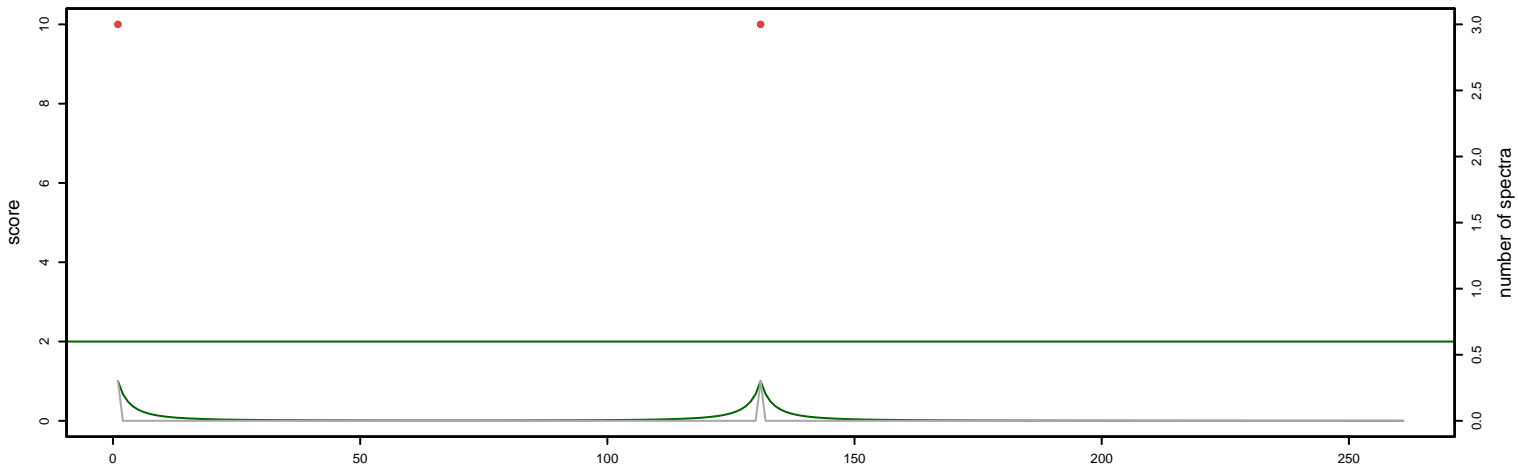

replica

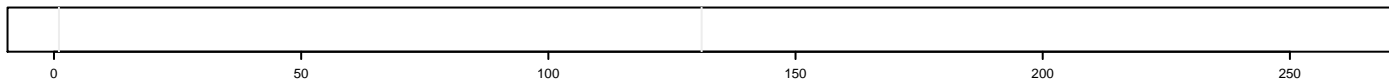

stability

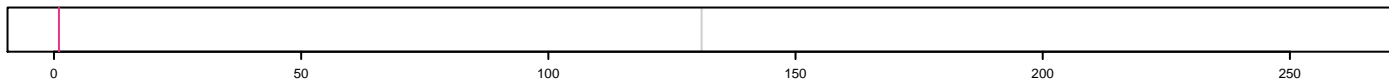

# Importin subunit beta-1 (Q14974)

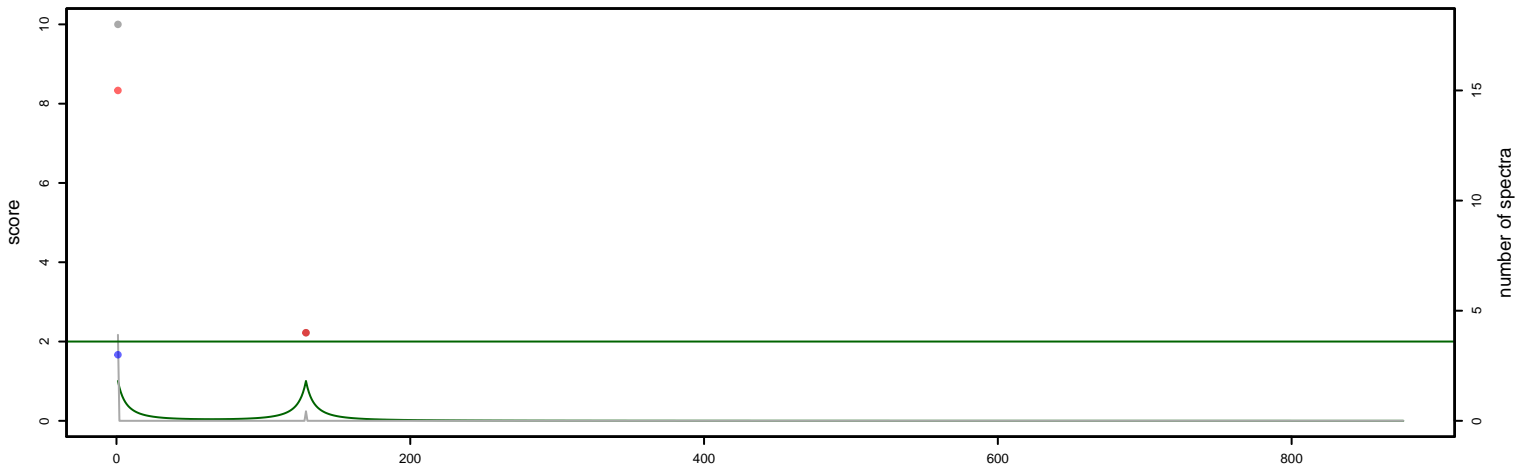

replica

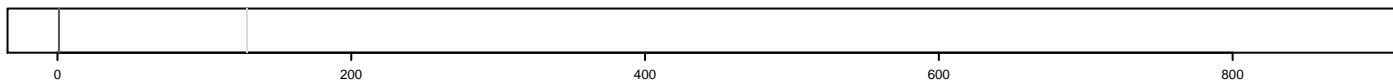

stability

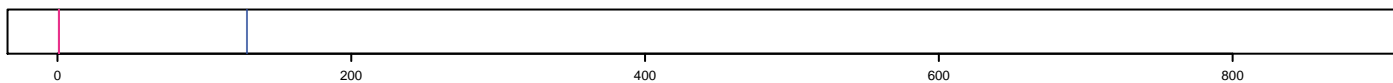



### Septin-2 (Q15019)

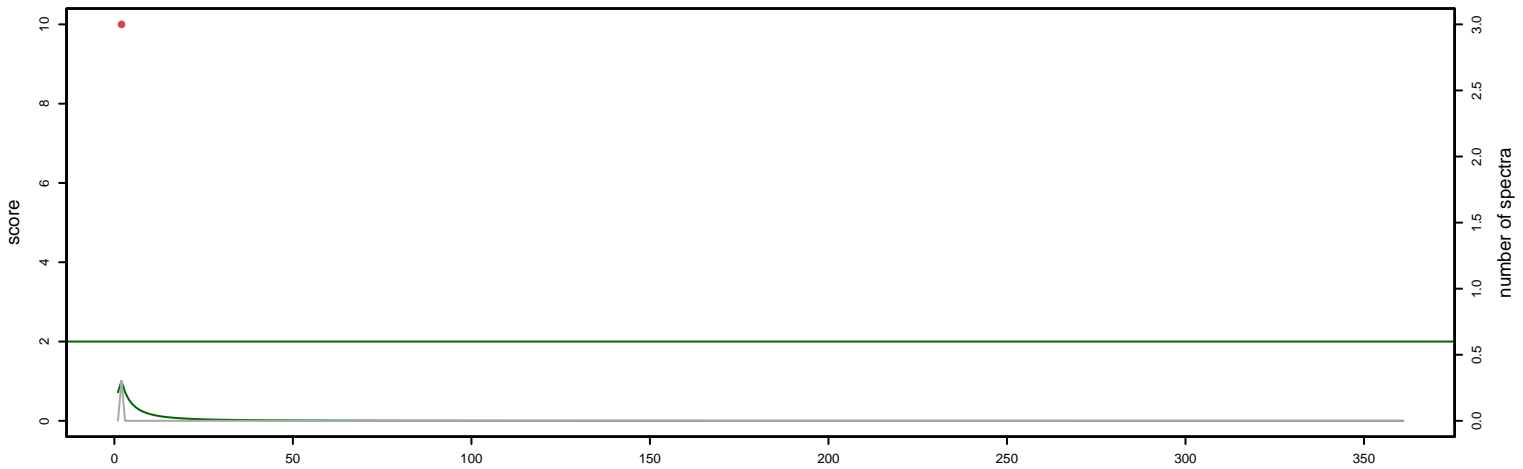

replica

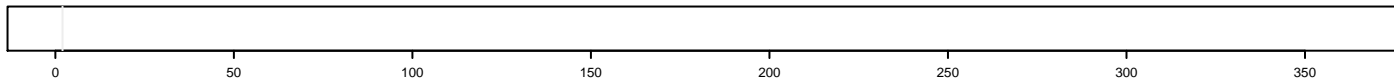

stability

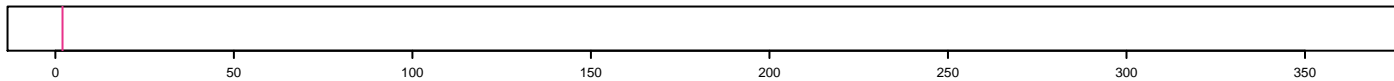

# Protein disulfide-isomerase A6 (Q15084)

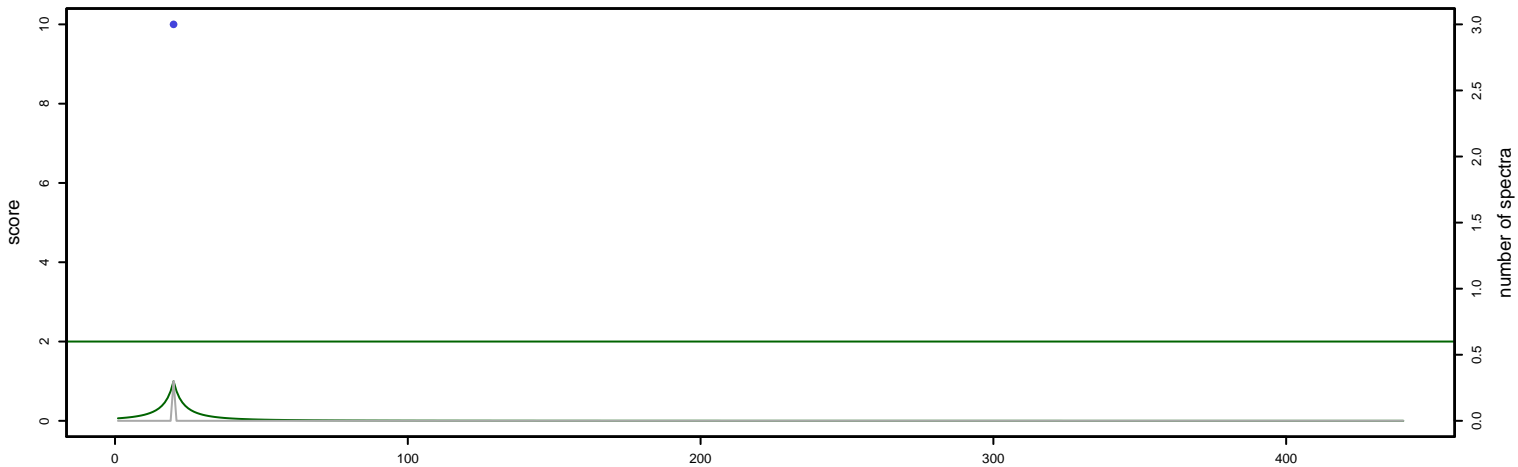

replica

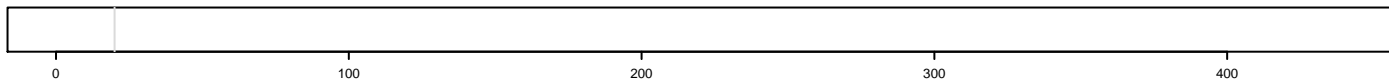

stability

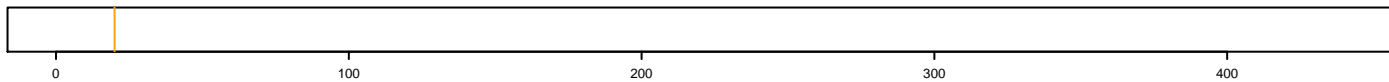

# Platelet-activating factor acetylhydrolase IB subunit gamma (Q15102)

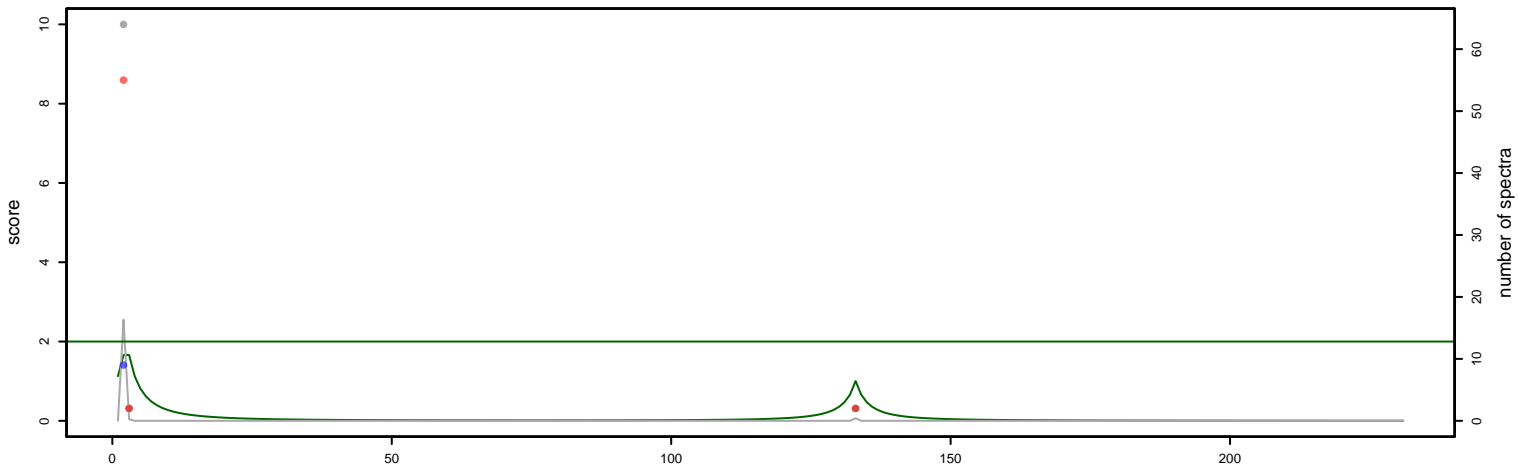

replica

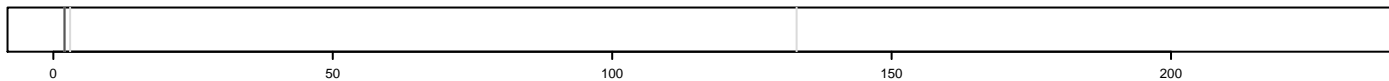

stability

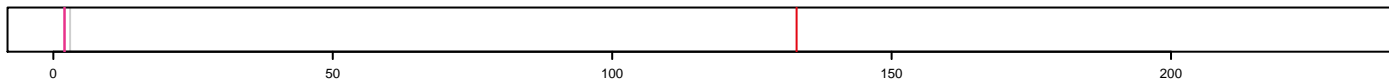

Serine/threonine-protein phosphatase 2A 56 kDa regulatory subunit beta isoform (Q15173)

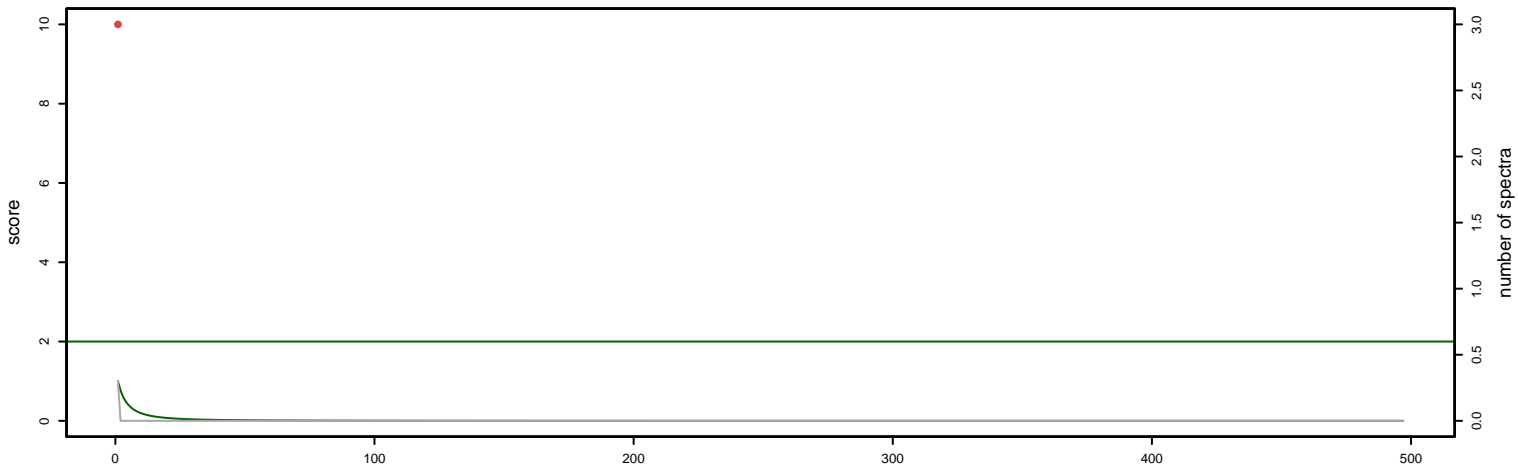

replica

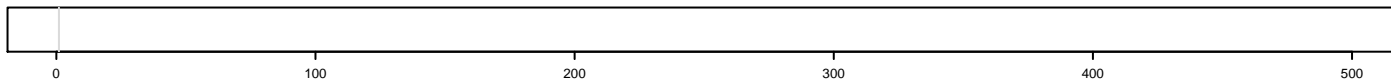

stability

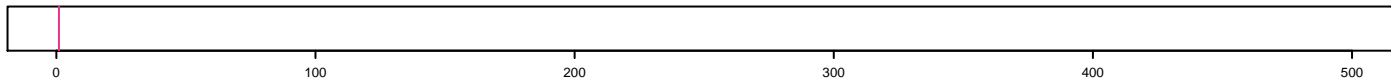

# Inorganic pyrophosphatase (Q15181)

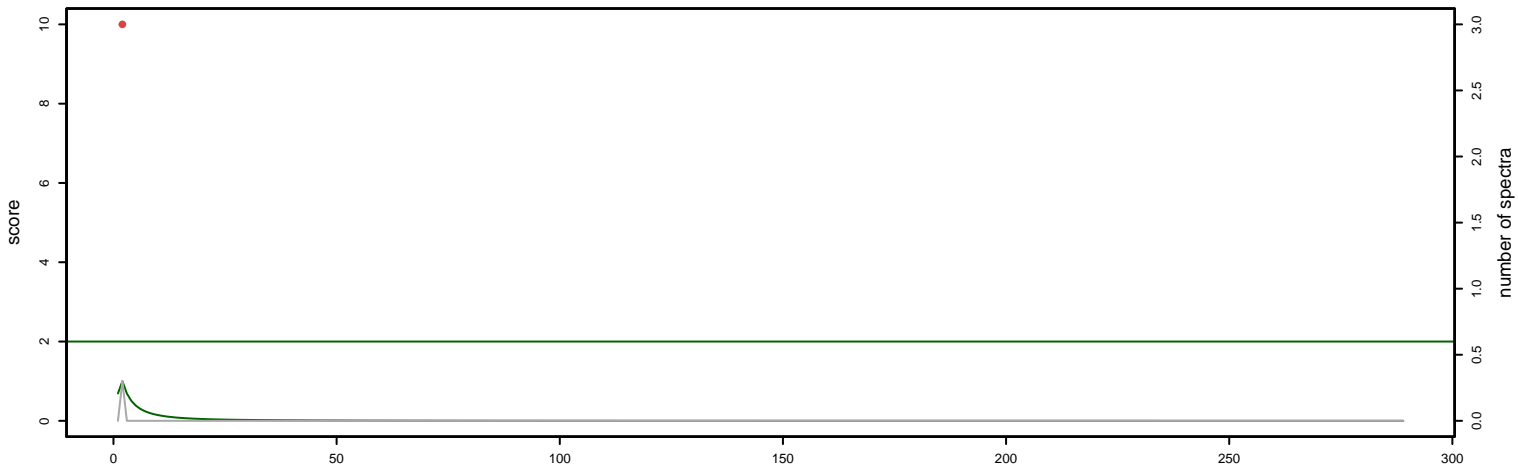

replica

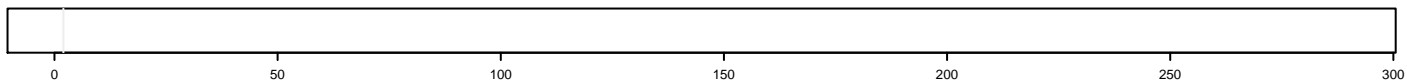

stability

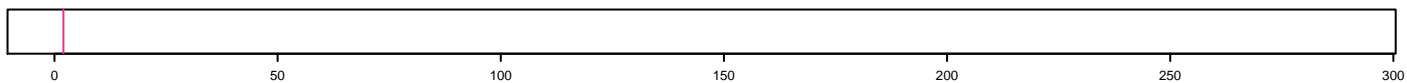

# Prostaglandin E synthase 3 (Q15185)

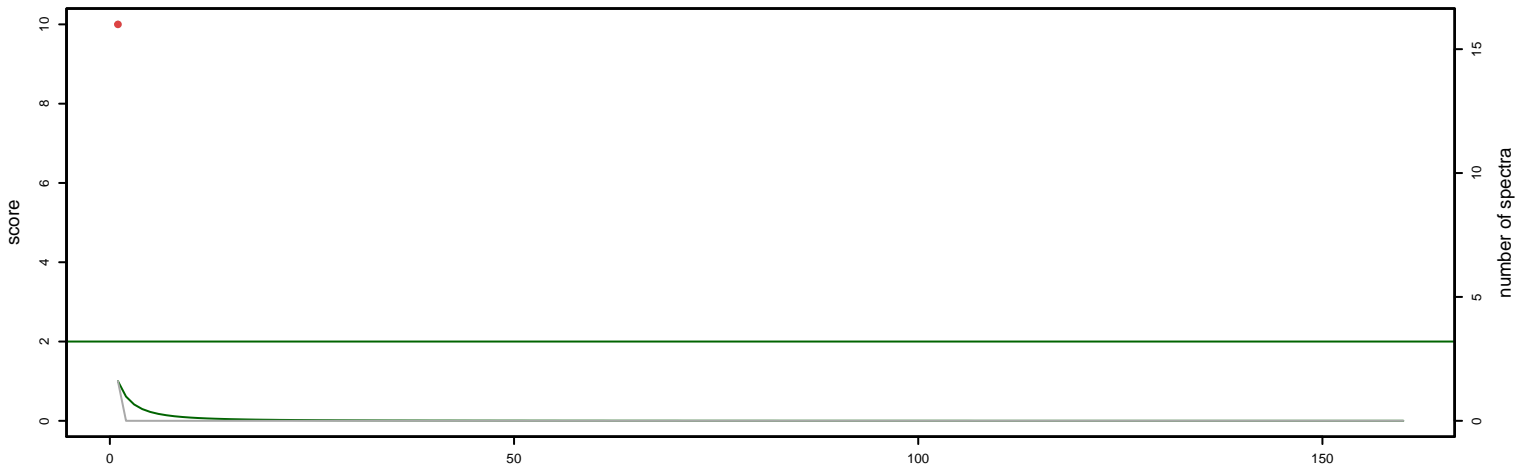

replica

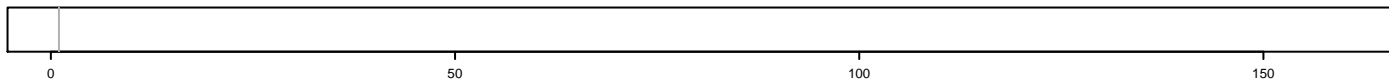

stability

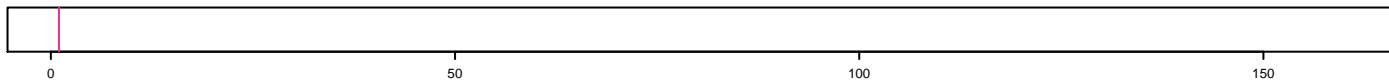

# Rab GTPase-binding effector protein 1 (Q15276)

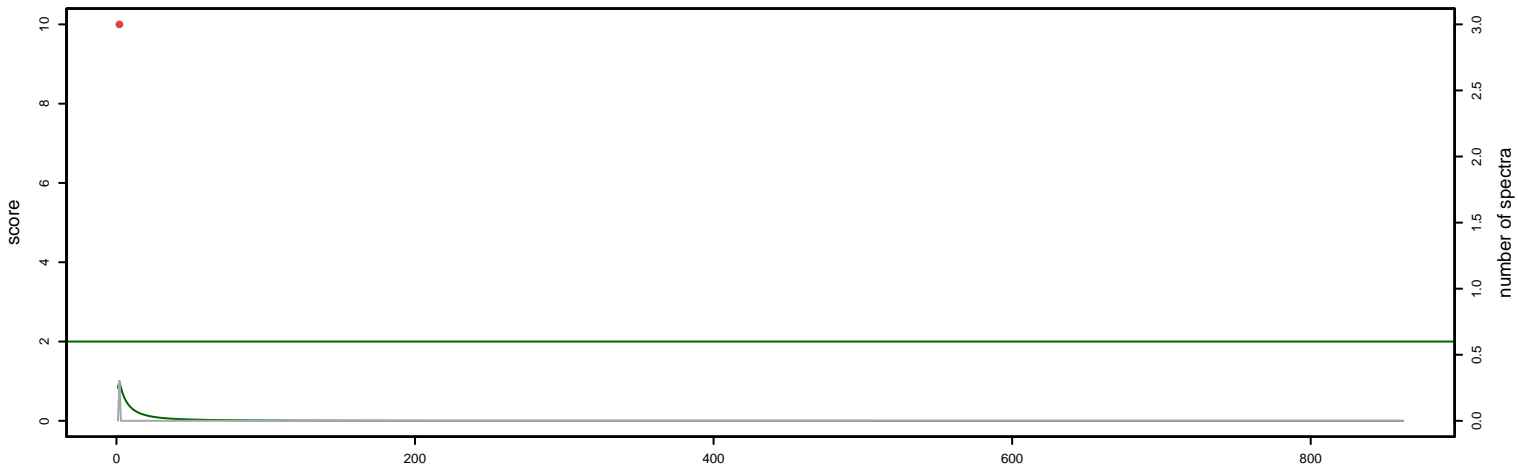

replica

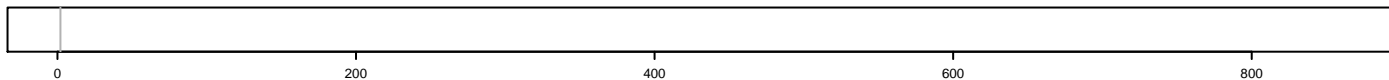

stability

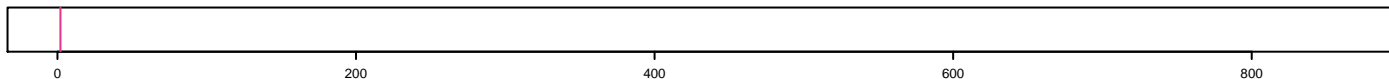

### Splicing factor 3B subunit 4 (Q15427)

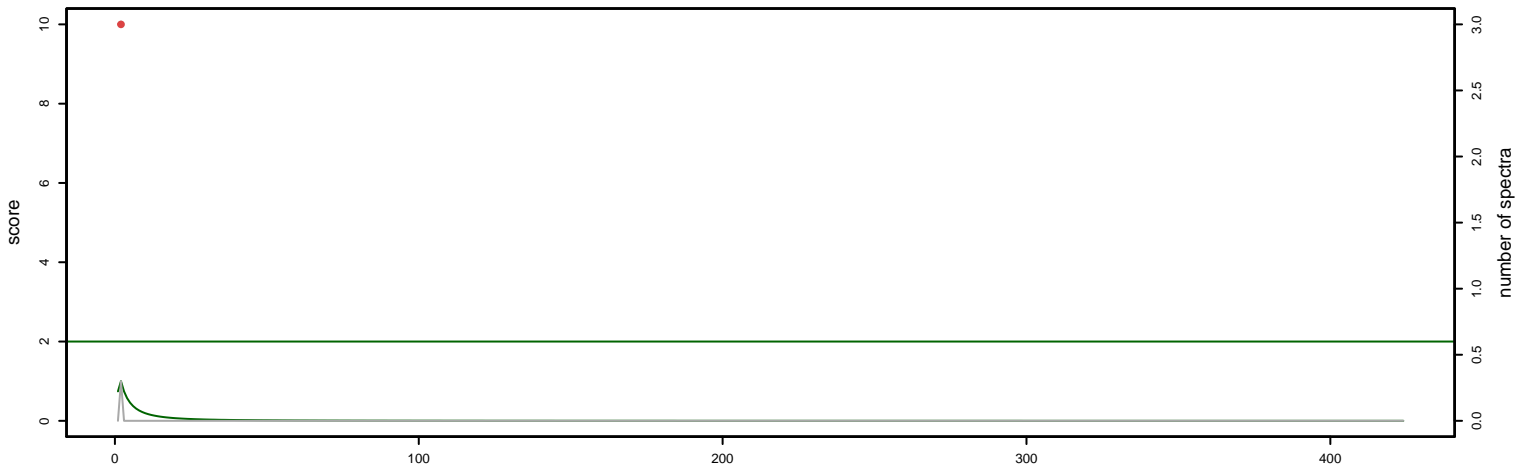

replica

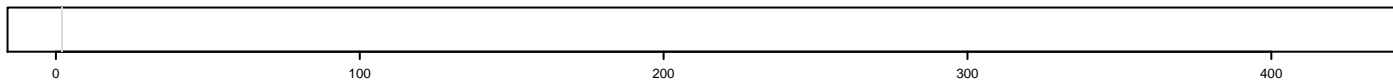

stability

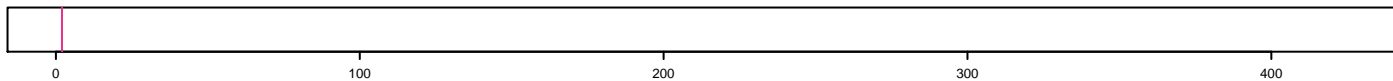



Protein transport protein Sec23B (Q15437)

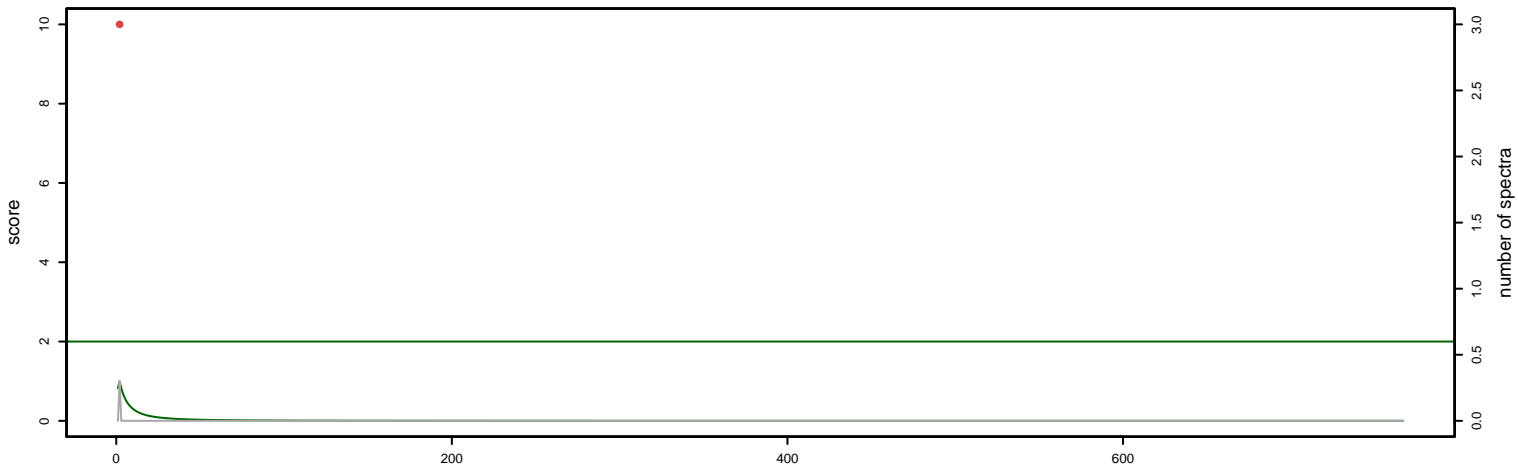

replica

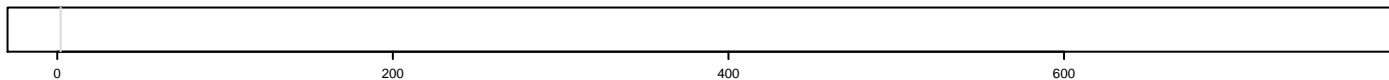

stability

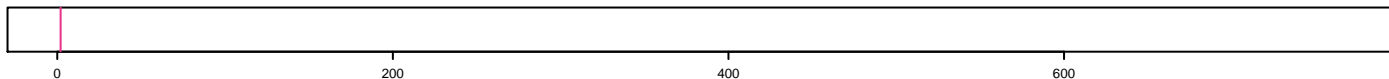

# Microtubule-associated protein RP/EB family member 1 (Q15691)

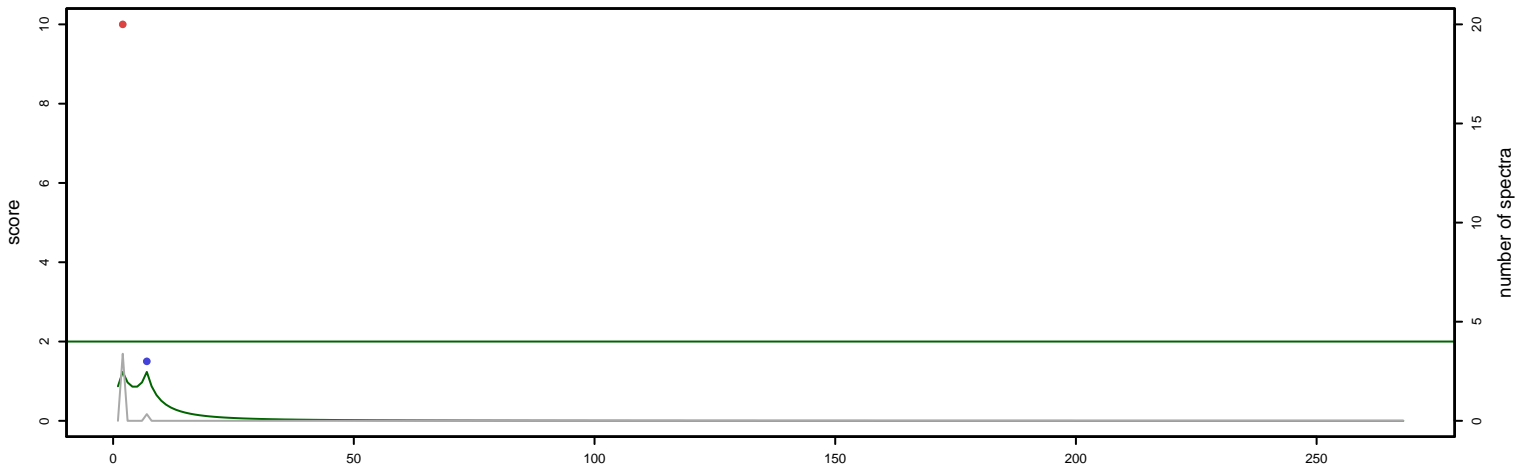

replica

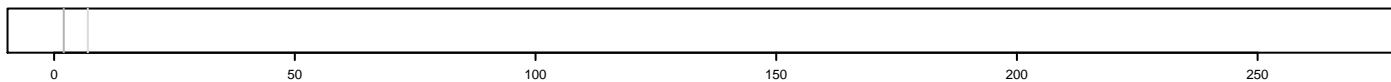

stability

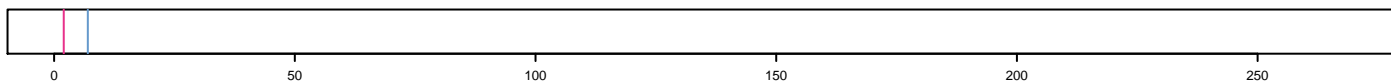

# Ubiquitin-conjugating enzyme E2 variant 2 (Q15819)

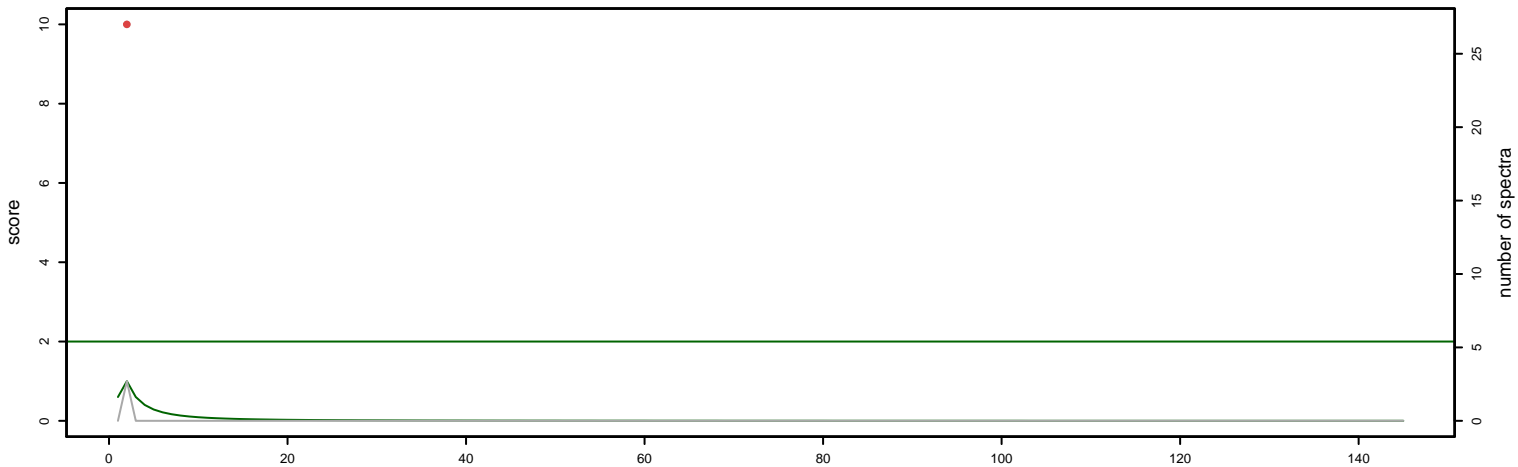

replica

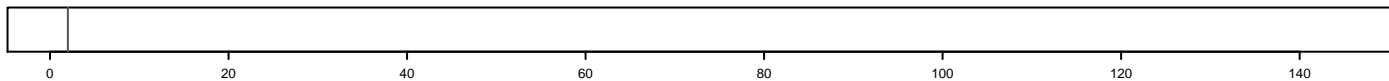

stability

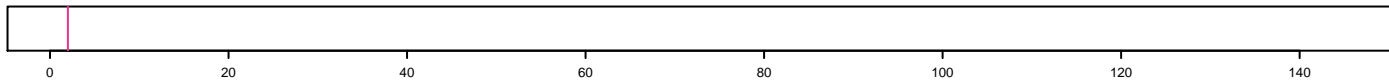

### Vesicle-associated membrane protein 3 (Q15836)

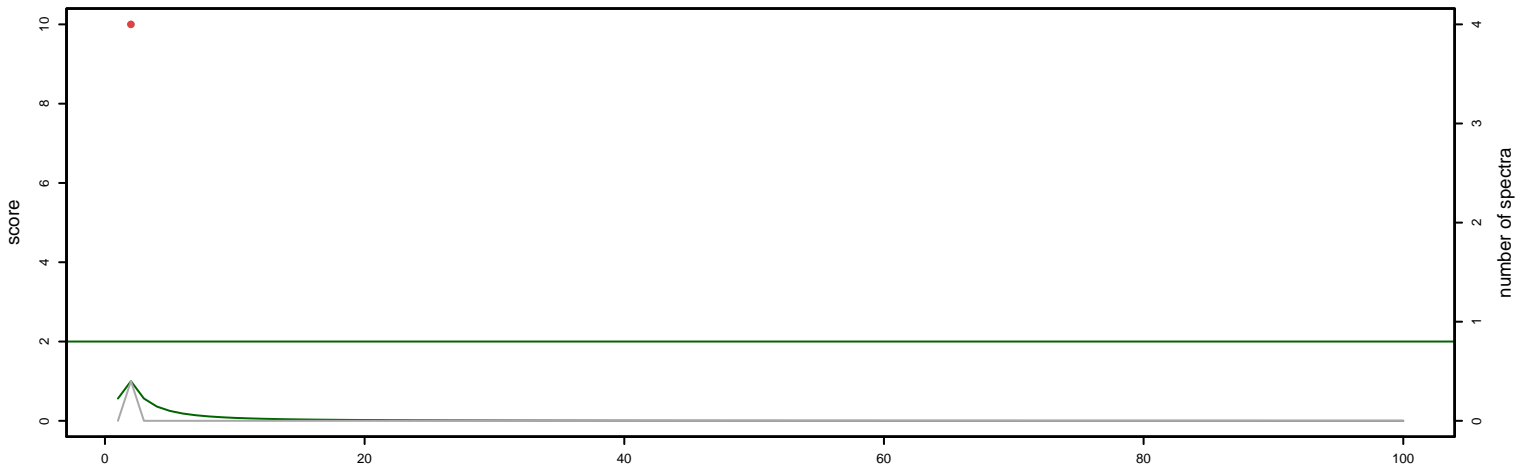

replica

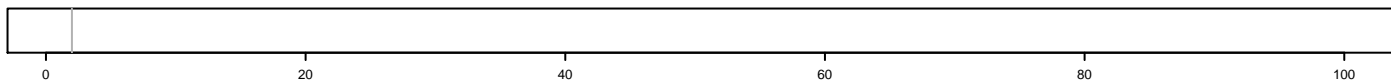

stability

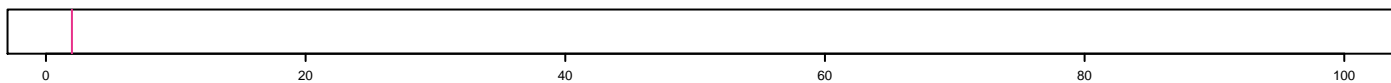

### 26S proteasome non-ATPase regulatory subunit 5 (Q16401)

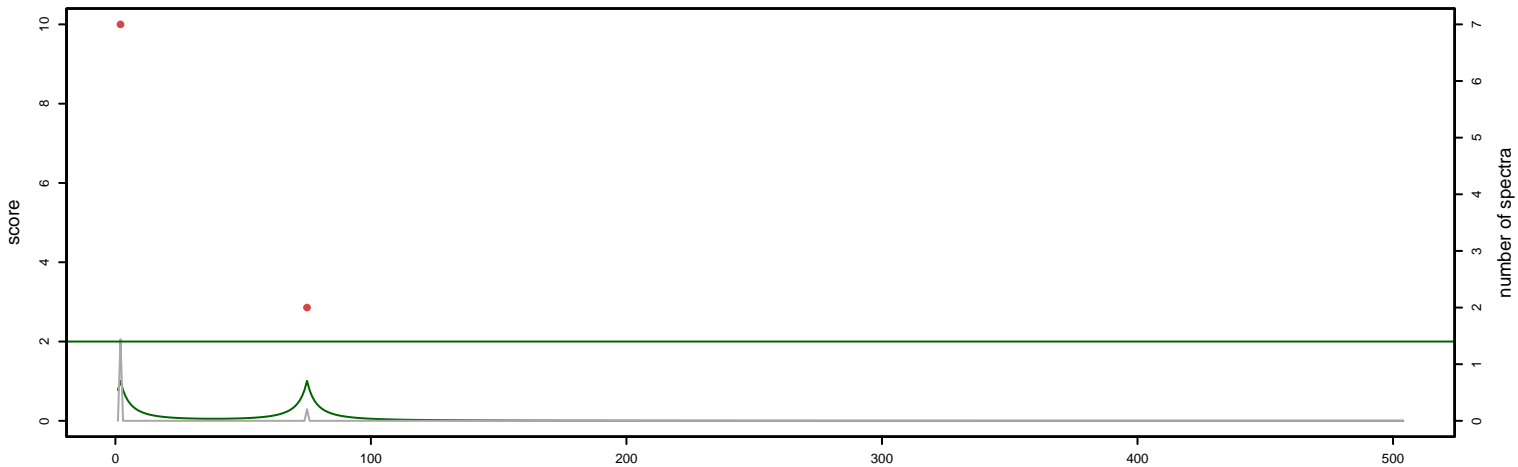

replica

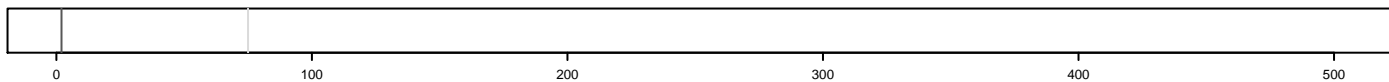

stability

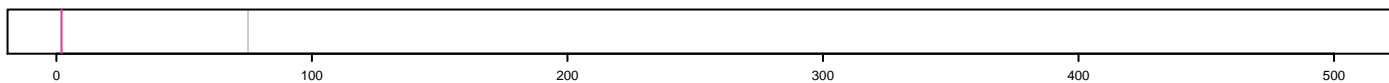

# DNA damage-binding protein 1 (Q16531)

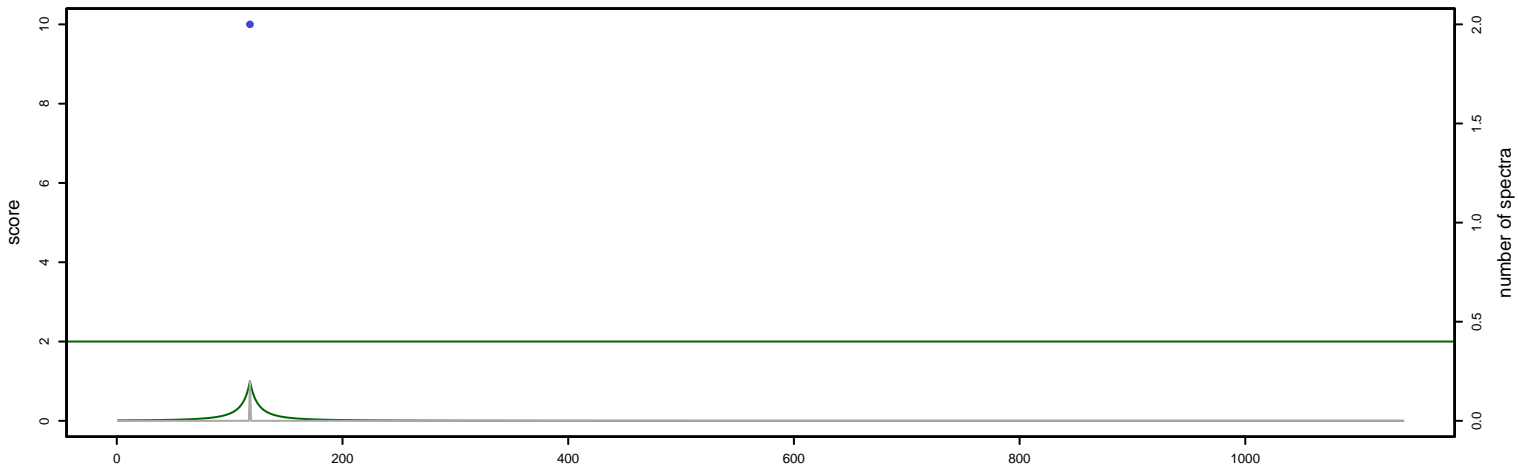

replica

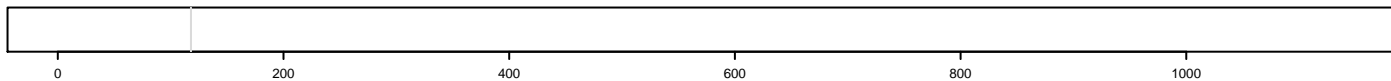

stability

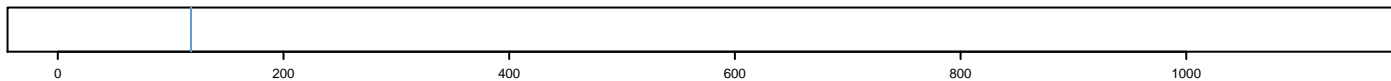

### Hsp90 co-chaperone Cdc37 (Q16543)

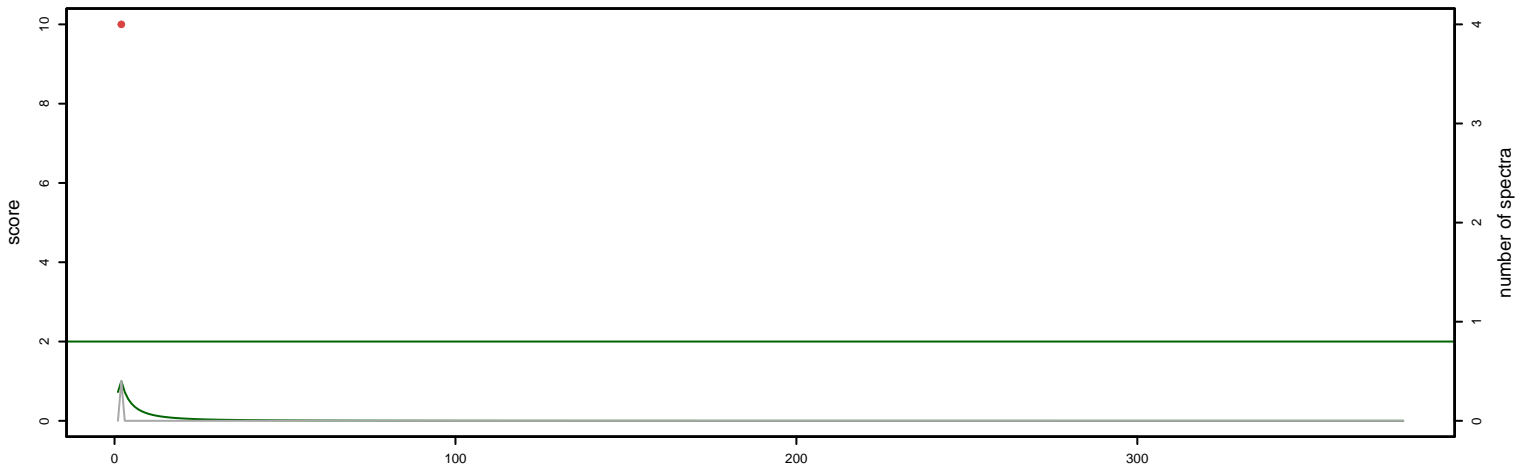

replica

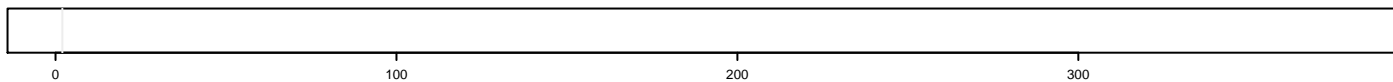

stability

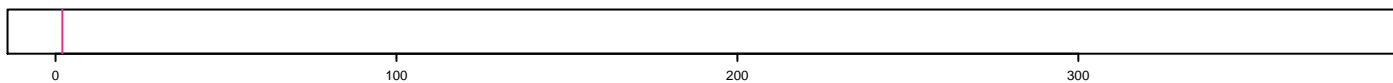

# Histone-binding protein RBBP7 (Q16576)

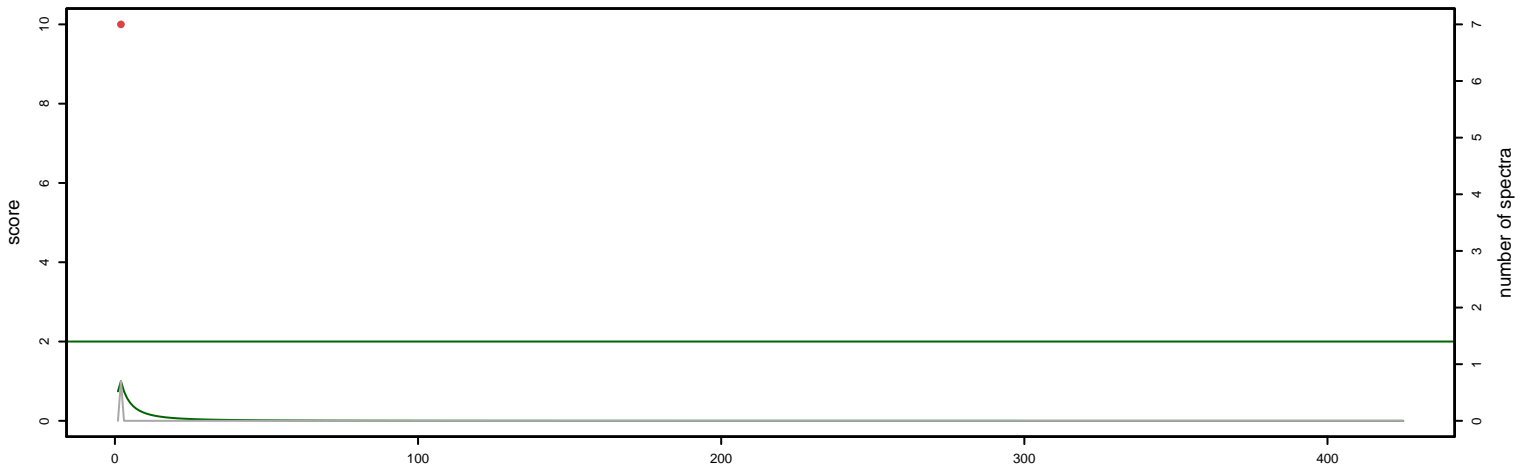

replica

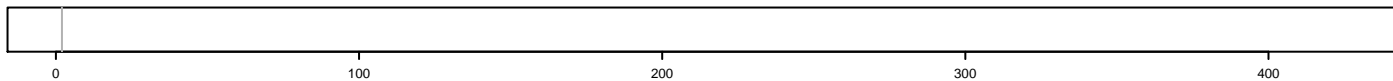

stability





# UTP--glucose-1-phosphate uridylyltransferase (Q16851)

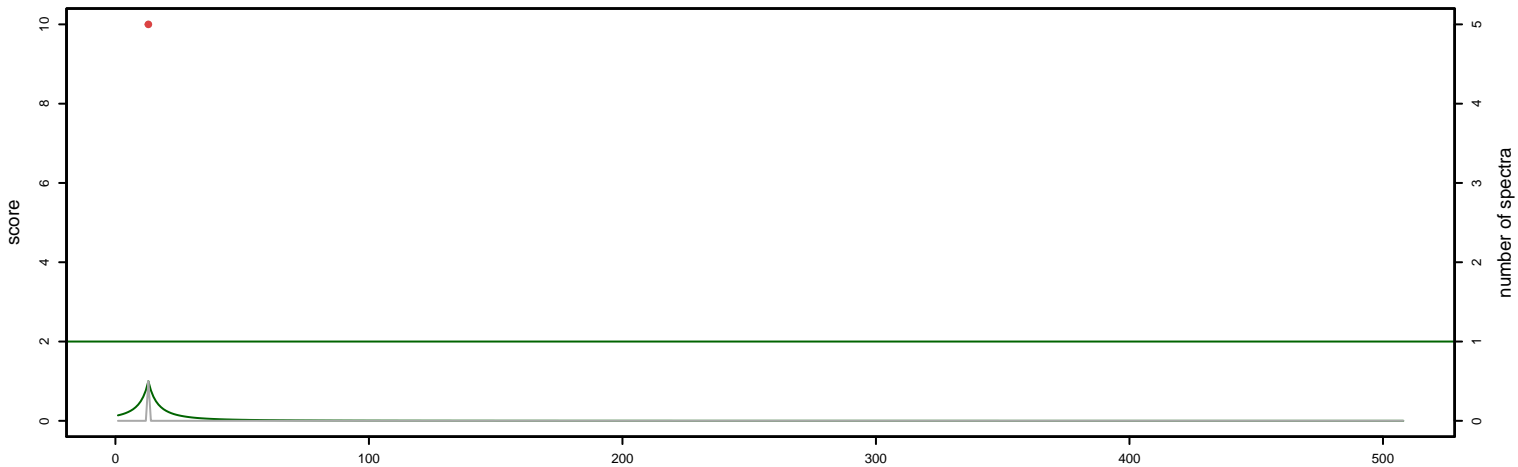

replica

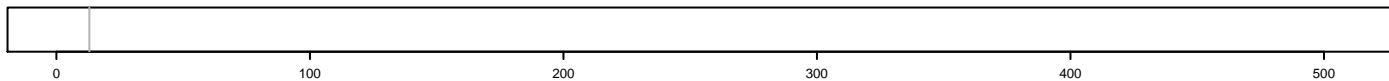

stability

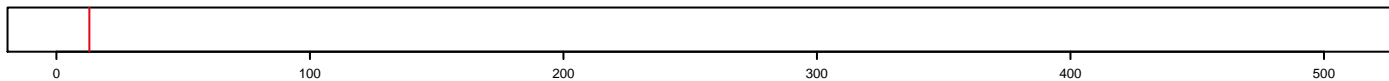

### Quinone oxidoreductase PIG3 (Q53FA7)

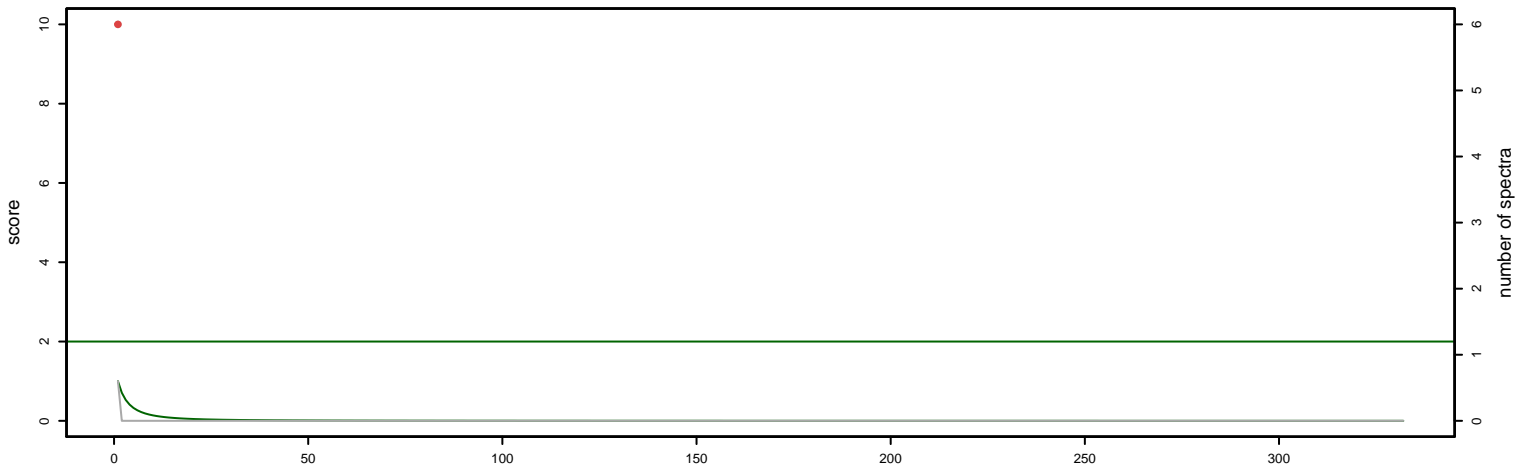

replica

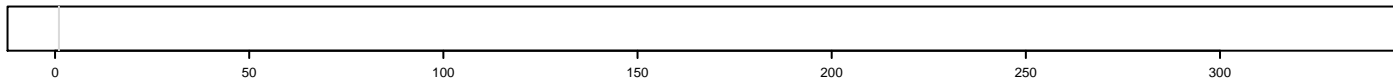

stability

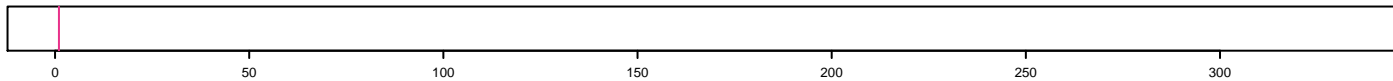

# Pyrroline-5-carboxylate reductase 3 (Q53H96)

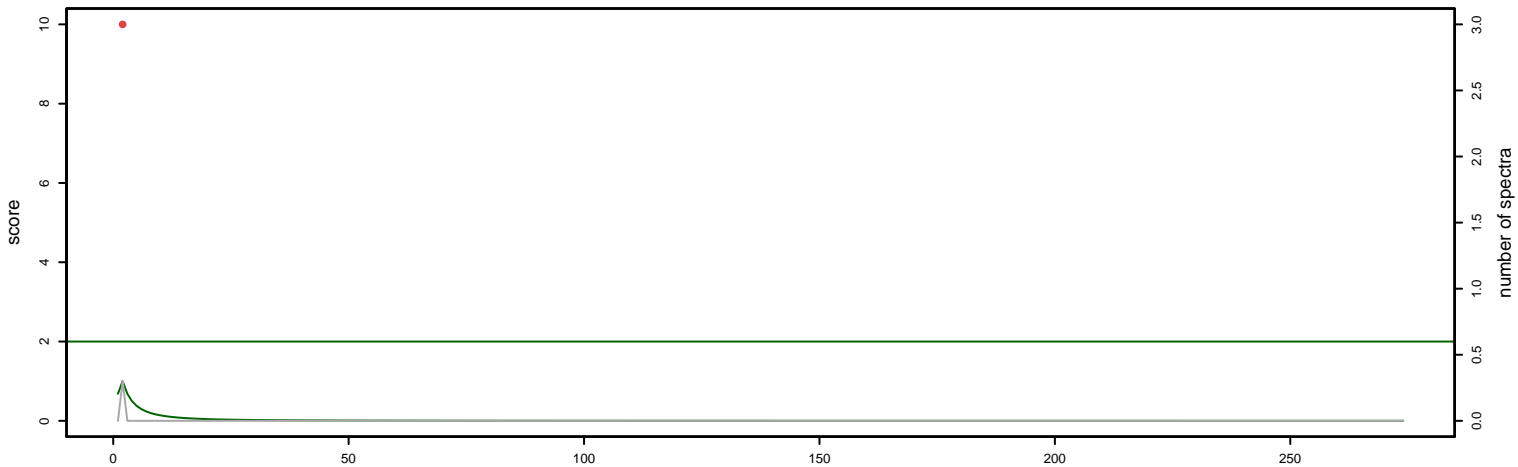

replica

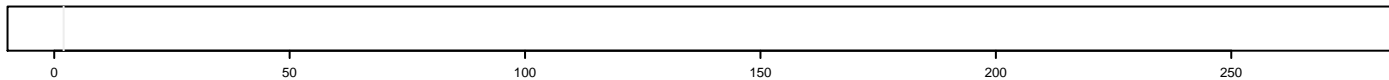

stability

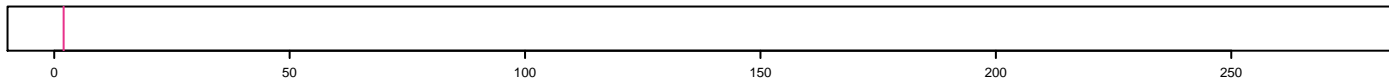

# HCLS1-binding protein 3 (Q53T59)

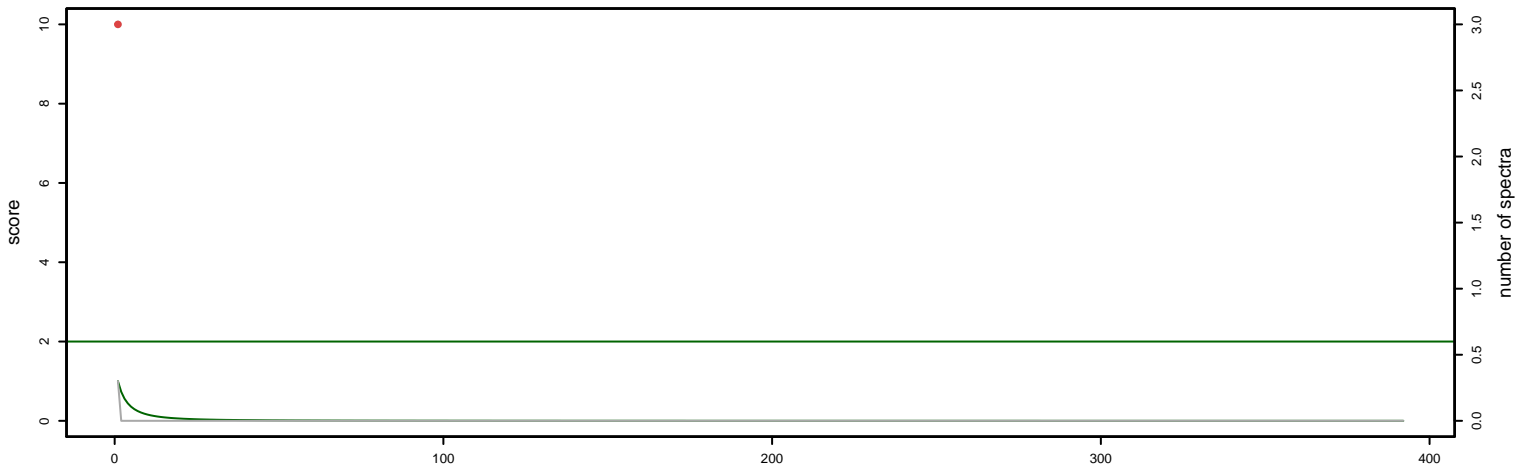

replica

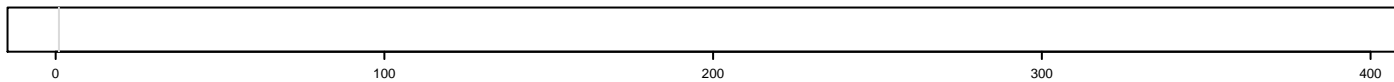

stability

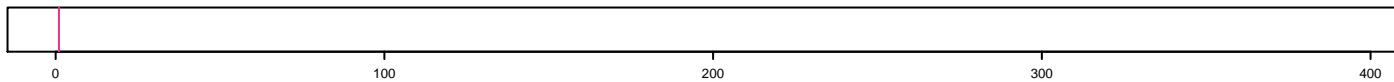

### Tensin variant (Q59G71)

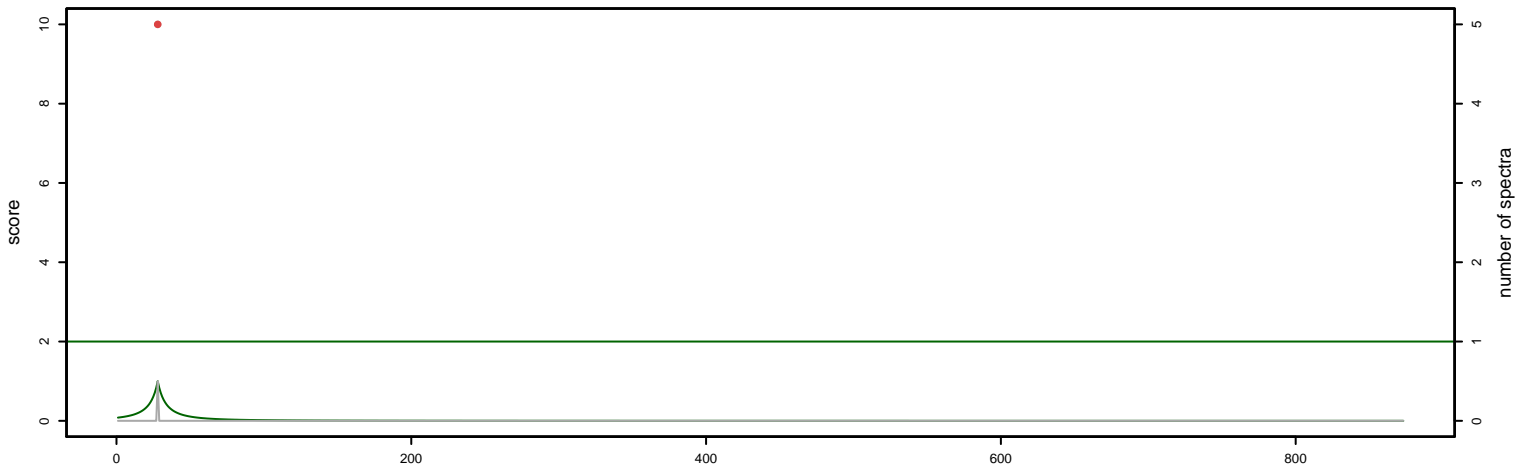

replica

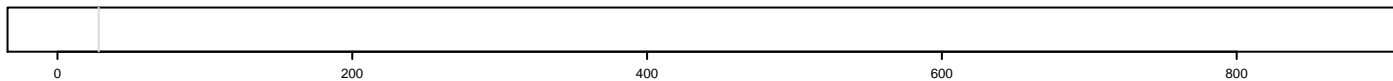

stability

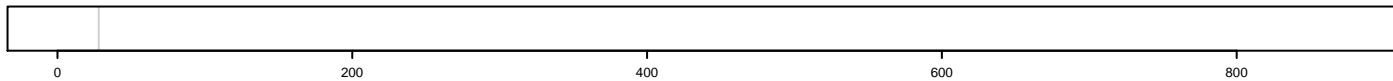

# WD repeat-containing protein 44 (Q5JSH3)

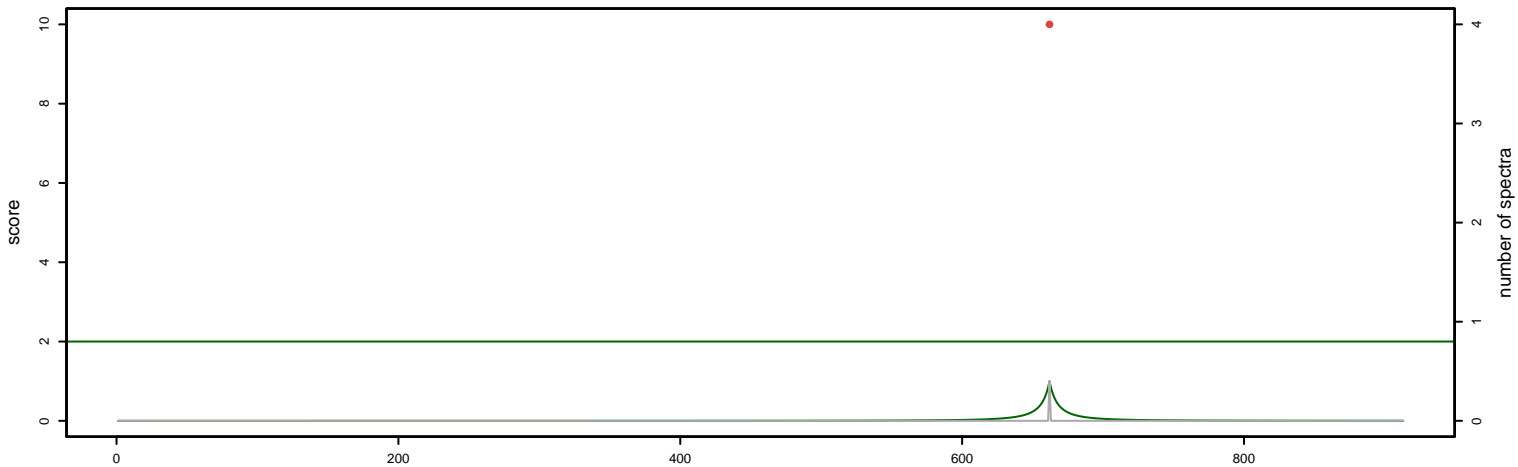

replica

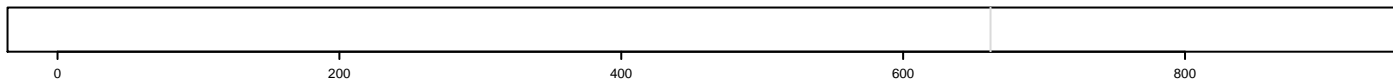

stability

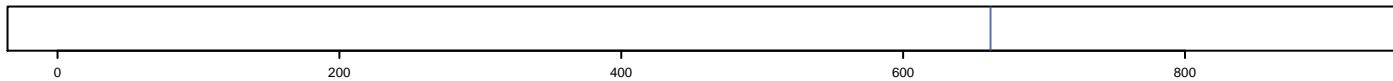

### E3 ubiquitin-protein ligase MARCH8 (Q5T0T0)

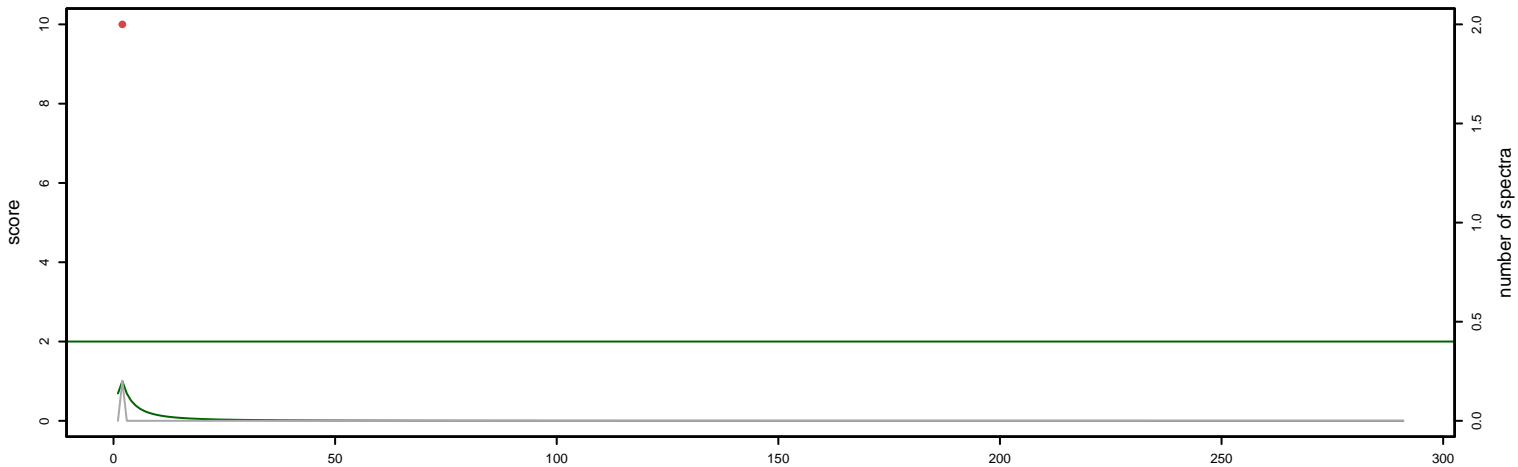

replica

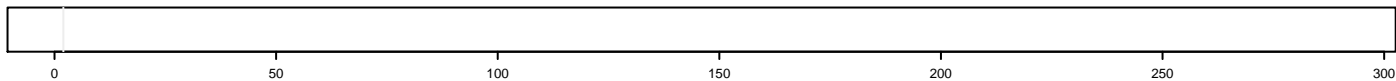

stability

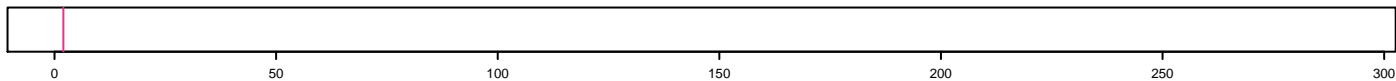

### E3 ubiquitin-protein ligase HECTD3 (Q5T447)

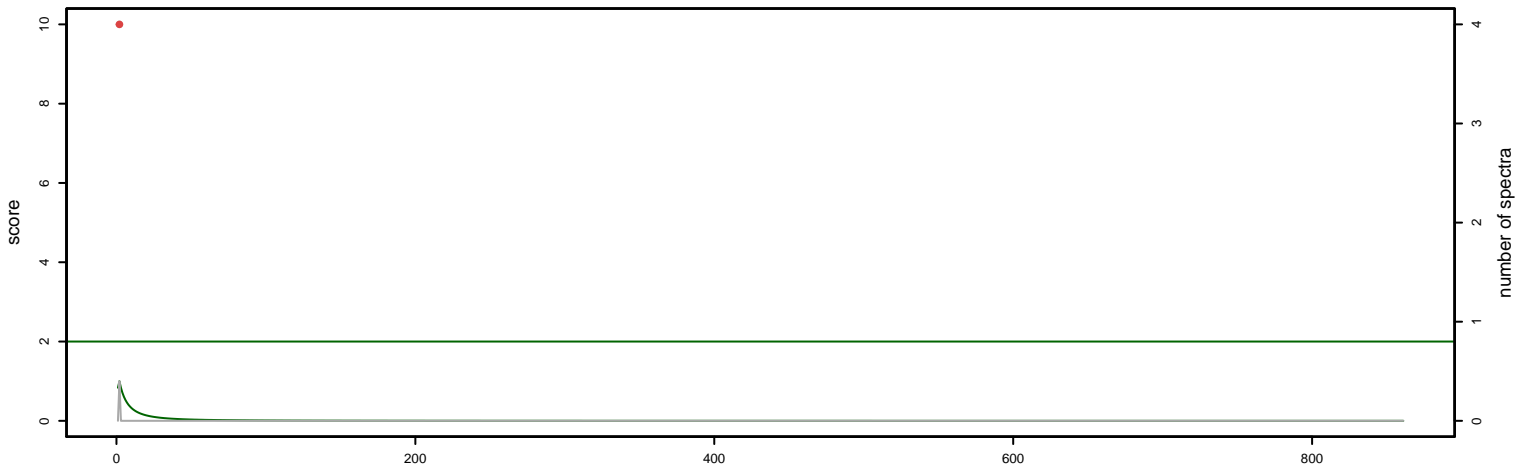

replica

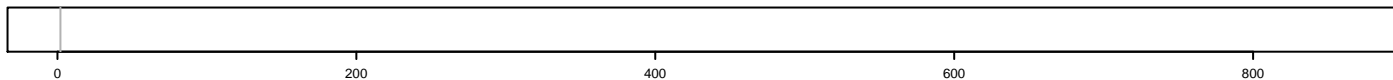

stability

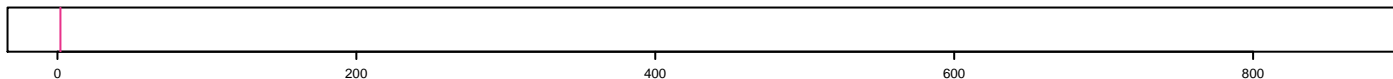



# UPF0553 protein C9orf64 (Q5T6V5)

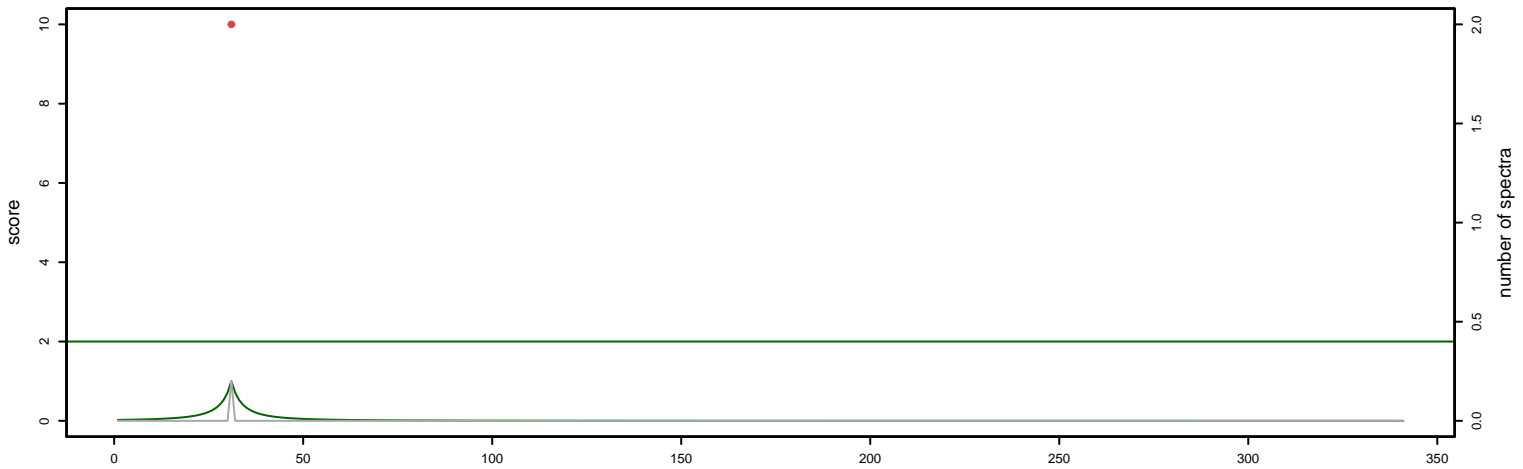

replica

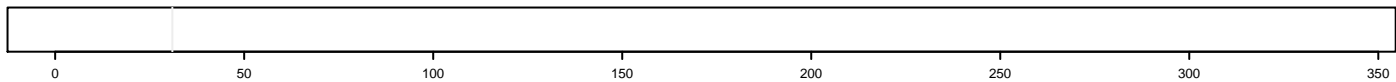

stability

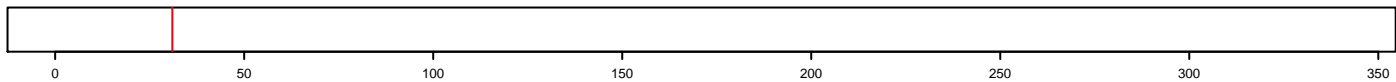

# Protein DDI1 homolog 2 (Q5TDH0)

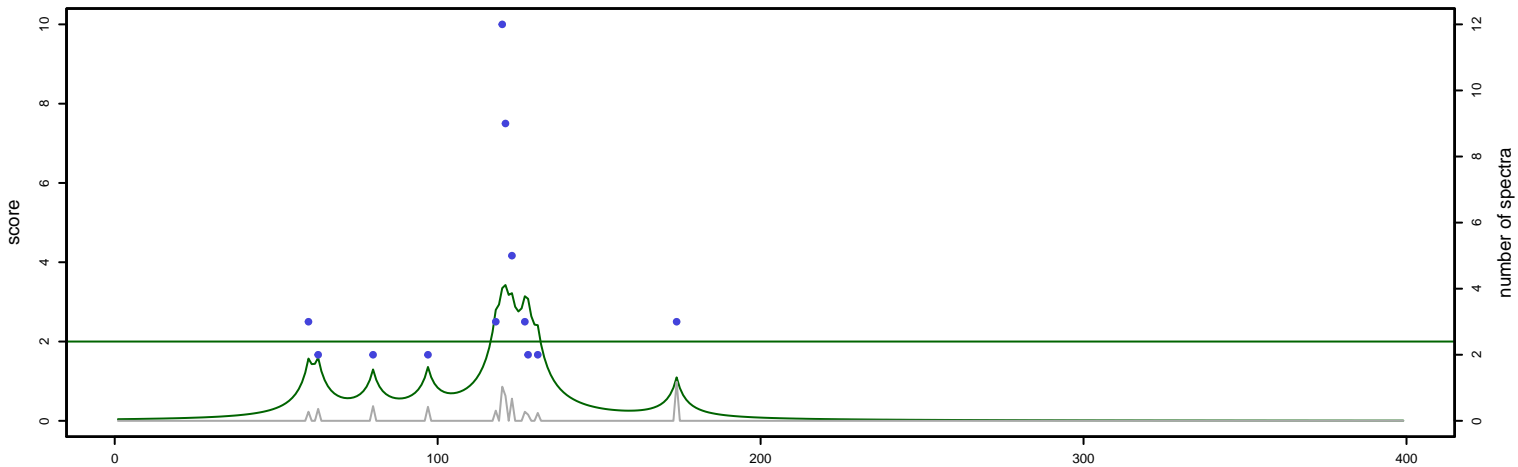

replica

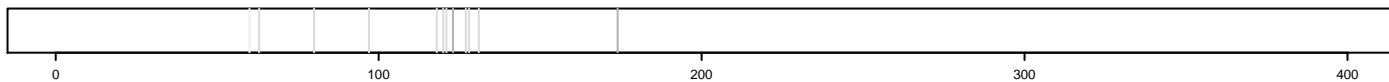

stability

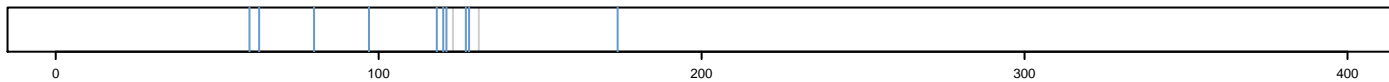

# Lysophospholipase-like protein 1 (Q5VWZ2)

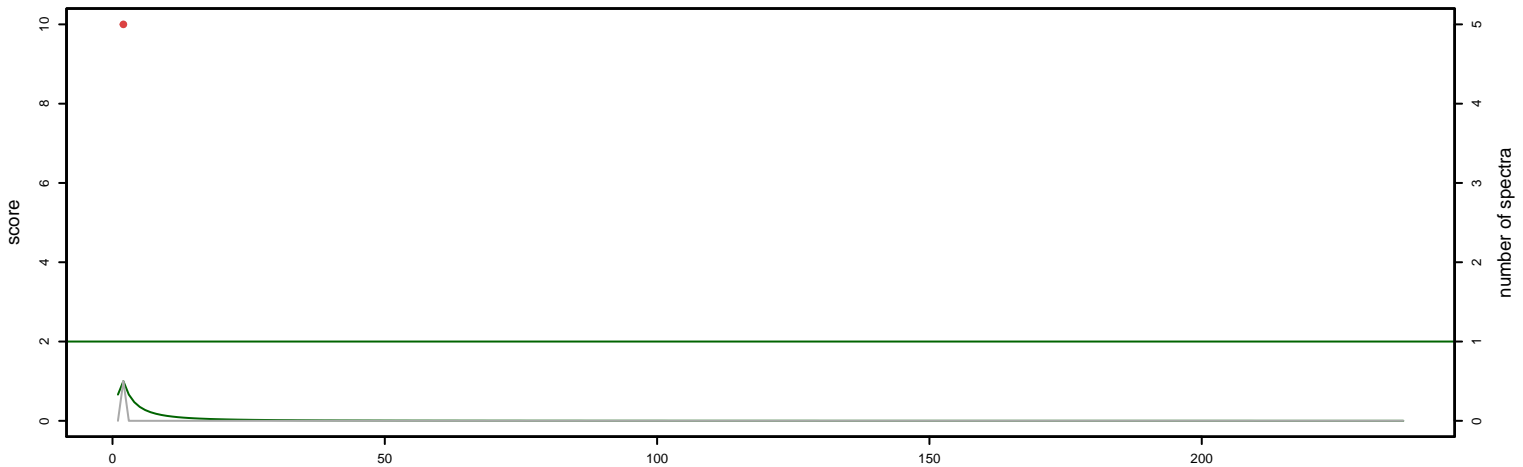

replica

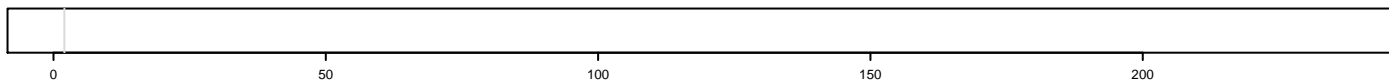

stability

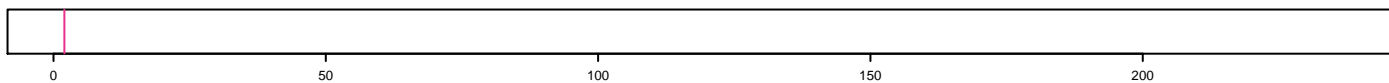

### Proteasome-associated protein ECM29 homolog (Q5VYK3)

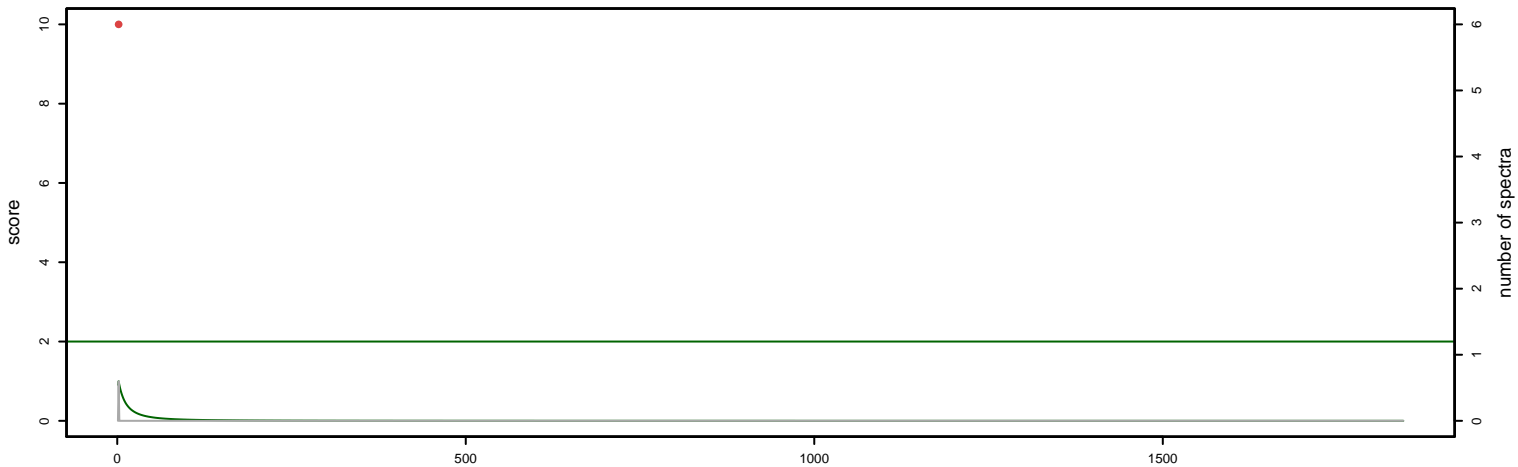

replica

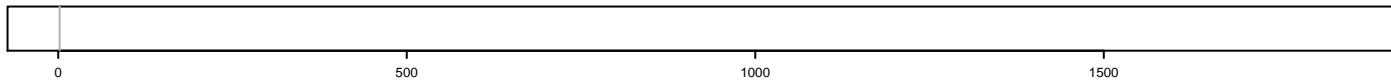

stability

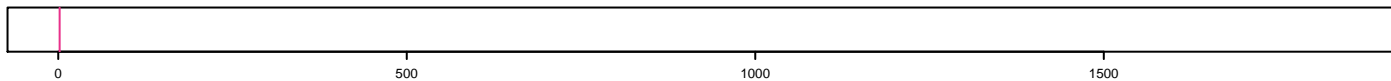

### E3 ubiquitin-protein ligase RNF123 (Q5XPI4)

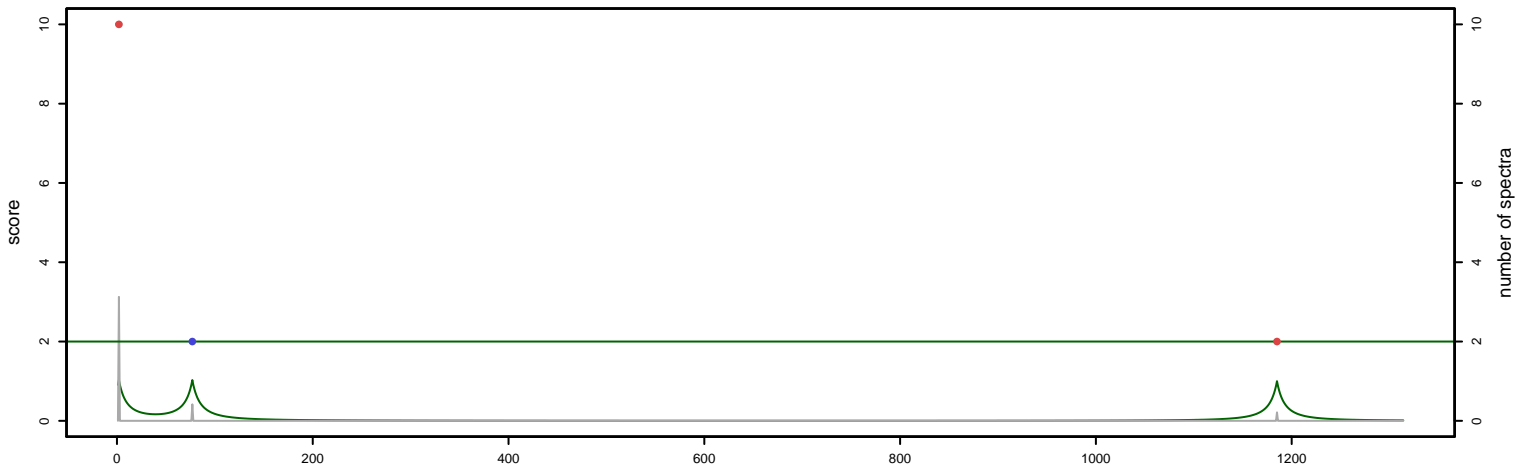

replica

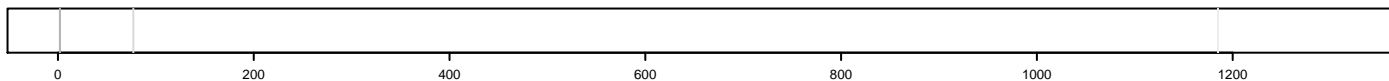

stability

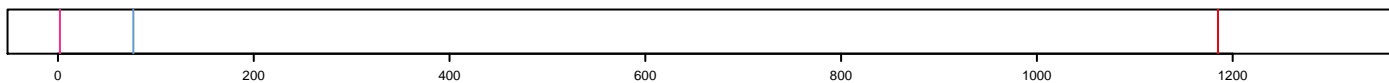

# Putative peptidyl-tRNA hydrolase PTRHD1 (Q6GMV3)

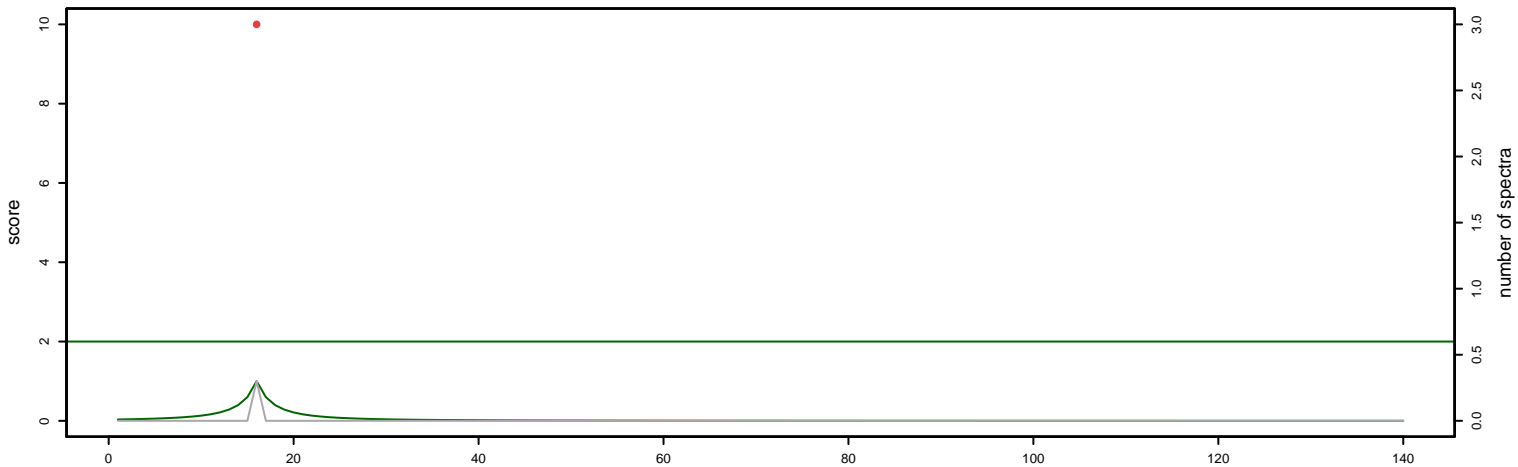

replica

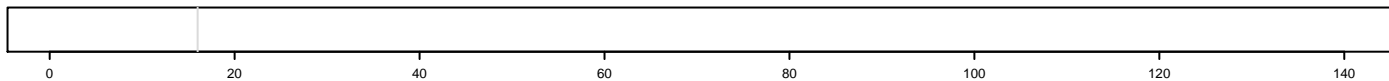

stability

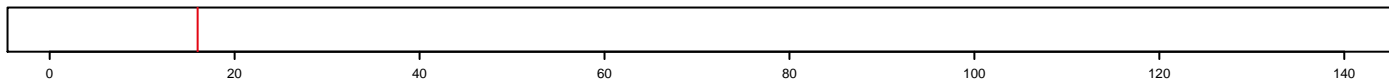

# Elongator complex protein 2 (Q6IA86)

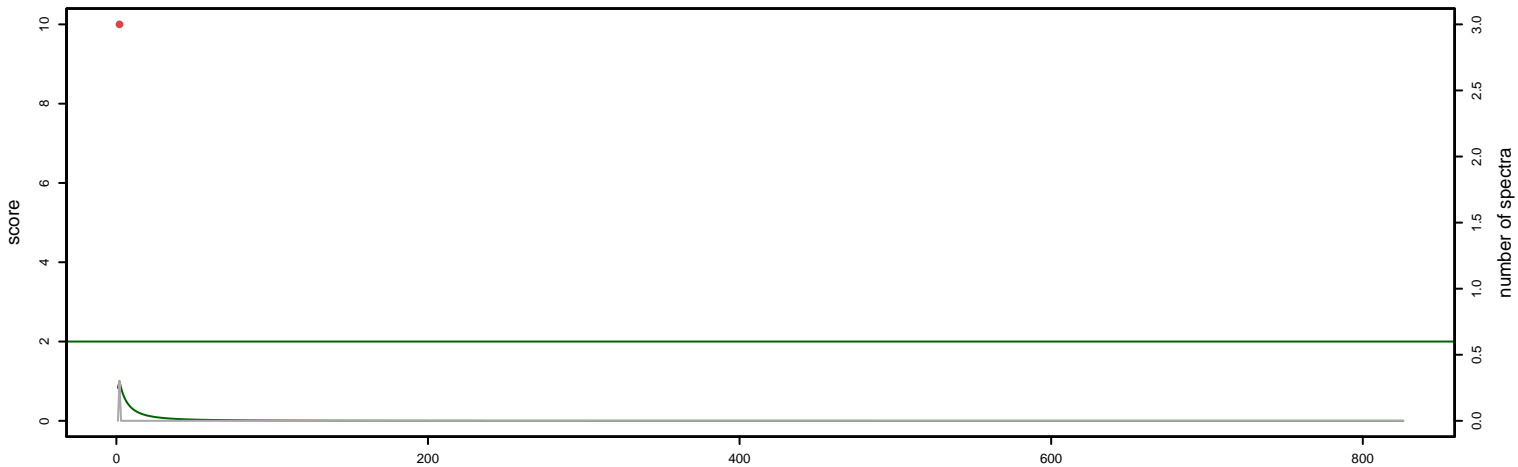

replica

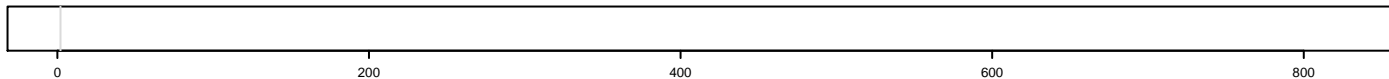

stability

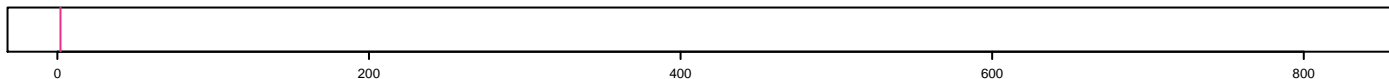

# Twinfilin-2 (Q6IBS0)

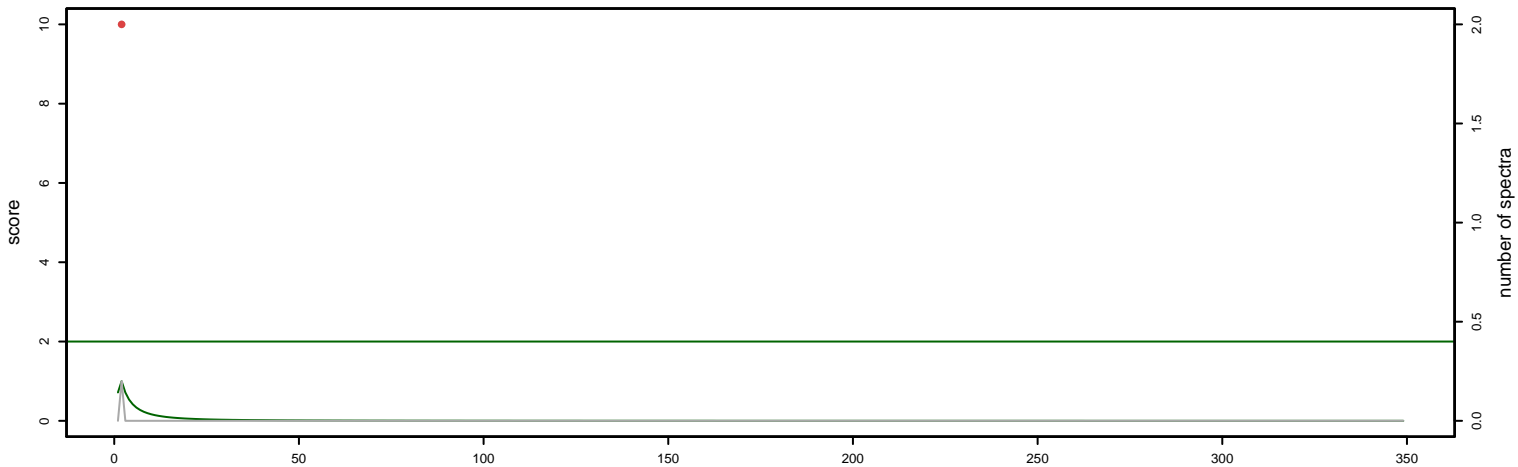

replica

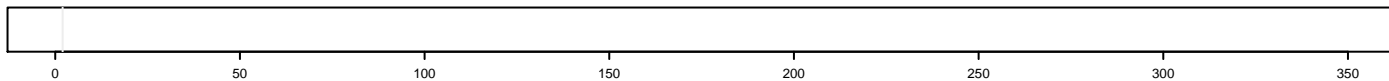

stability

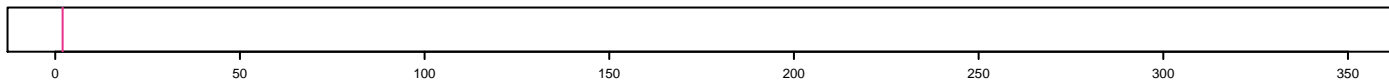



# Ankyrin repeat domain-containing protein 54 (Q6NXT1)

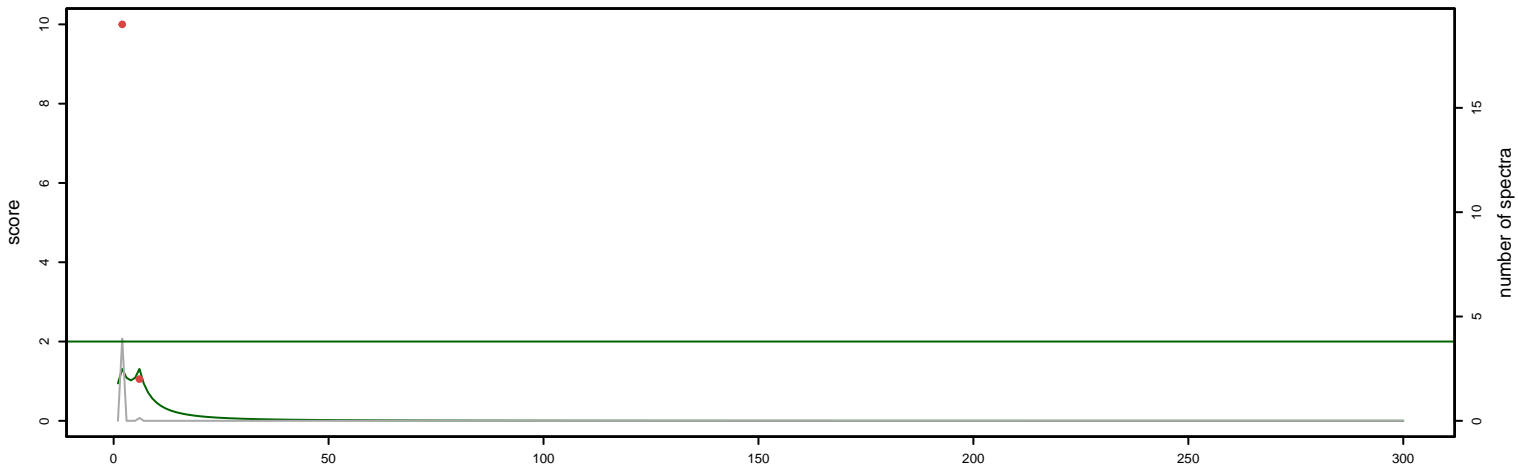

replica

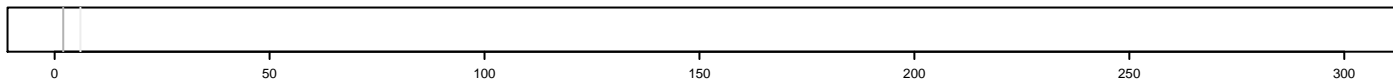

stability

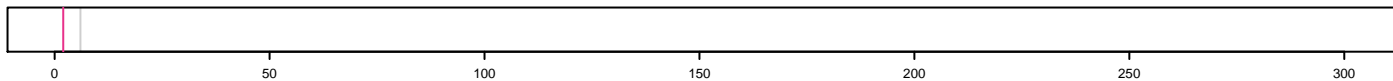

# Nicotinate phosphoribosyltransferase (Q6XQN6)

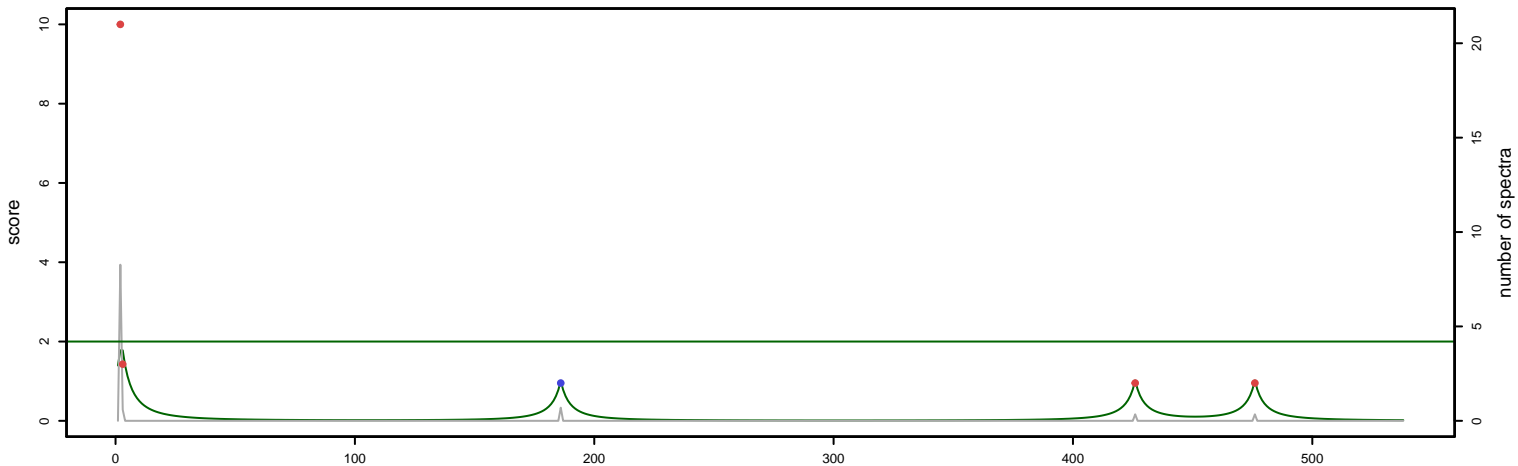

replica

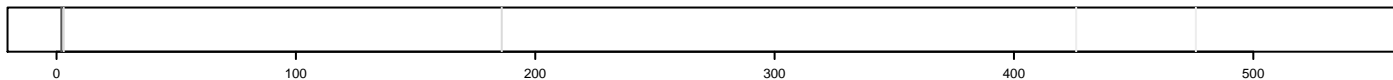

stability

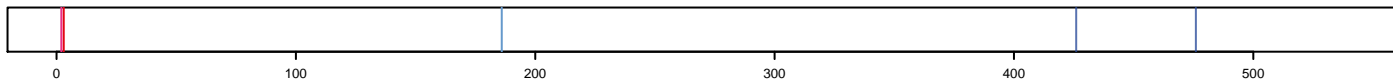

### Vacuolar protein sorting-associated protein 13C (Q709C8)

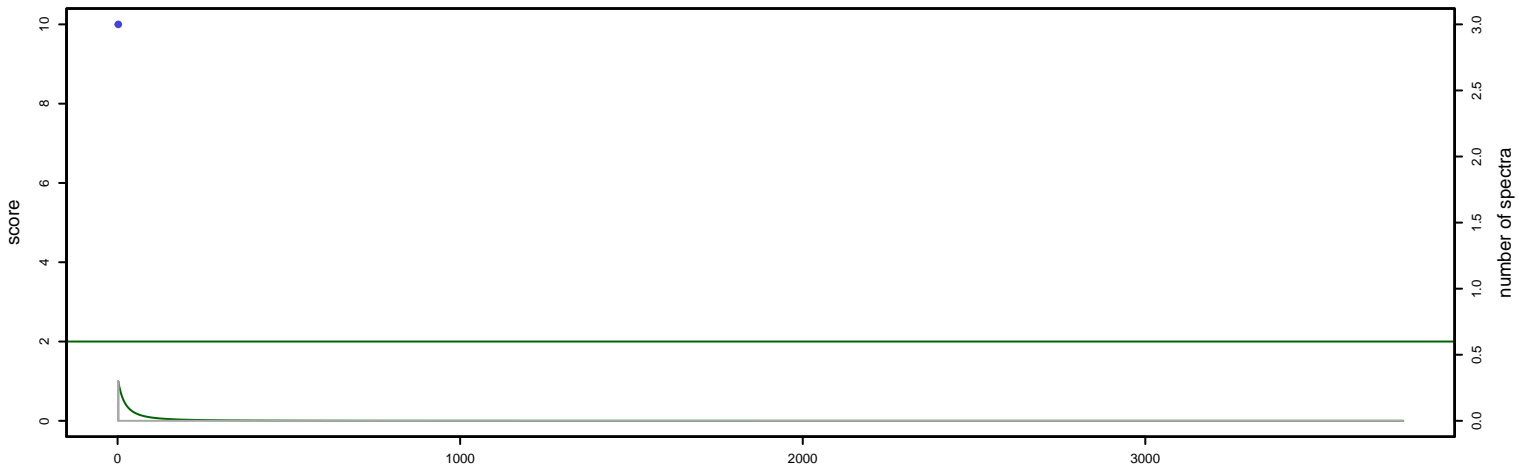

replica

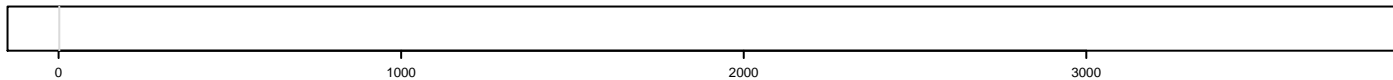

stability

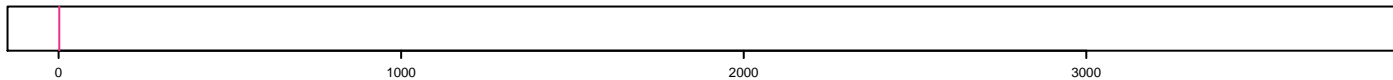

### Eukaryotic translation initiation factor 3 subunit M (Q7L2H7)

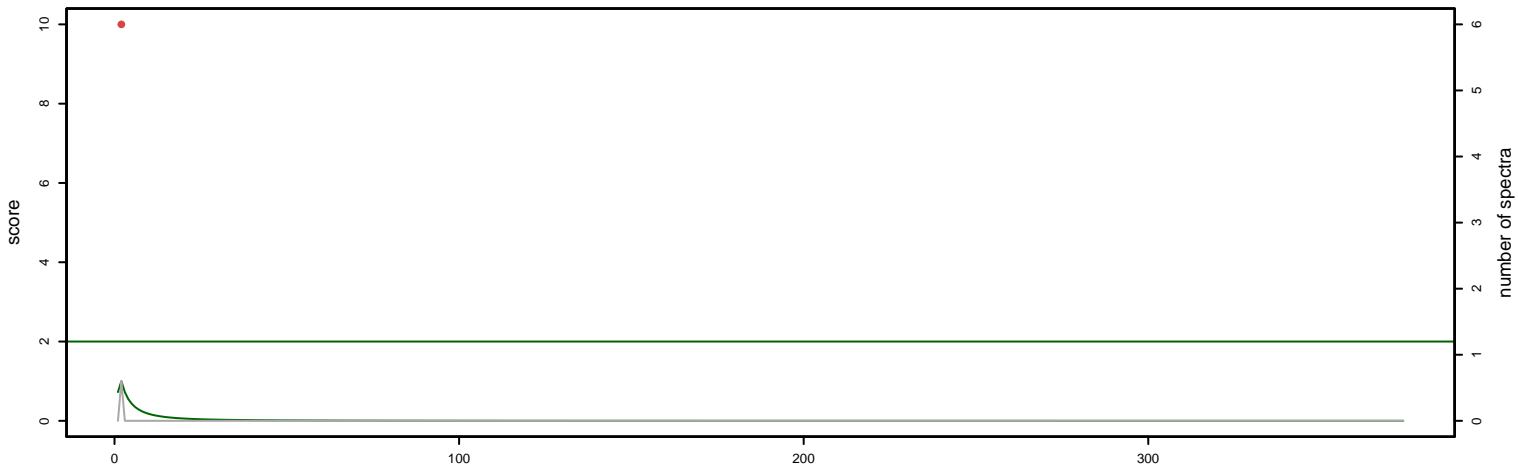

replica

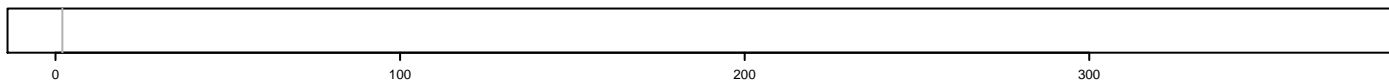

stability

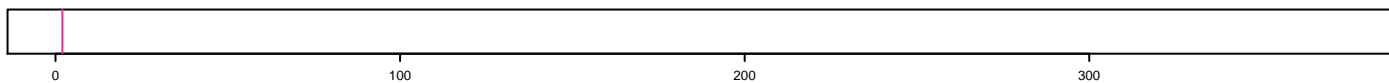

### Golgi to ER traffic protein 4 homolog (Q7L5D6)

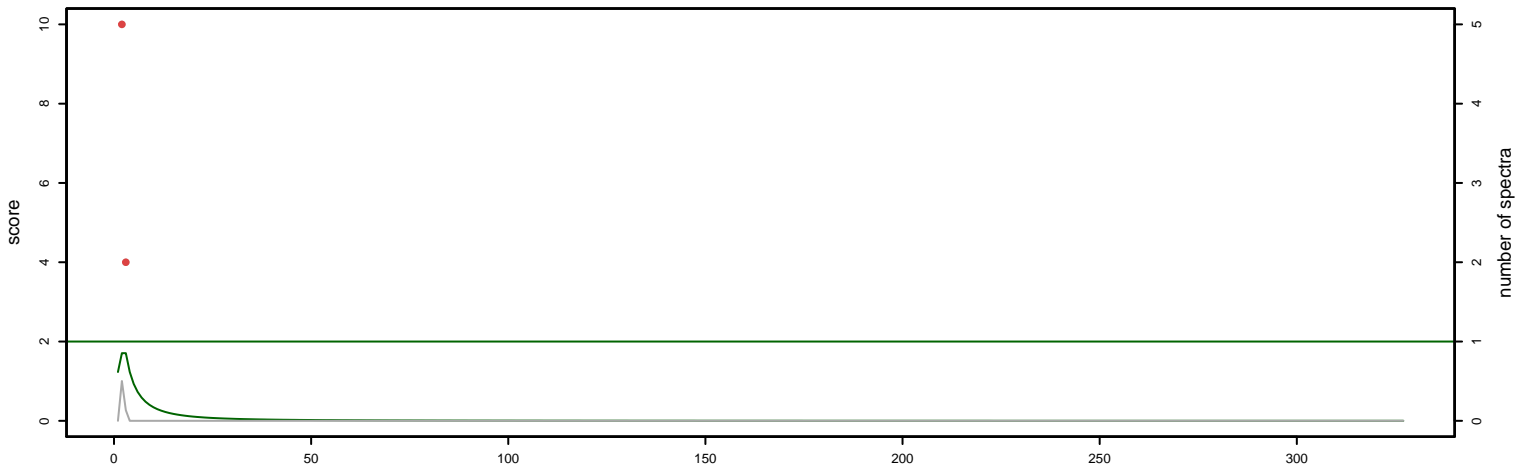

replica

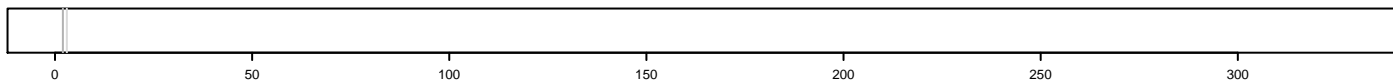

stability

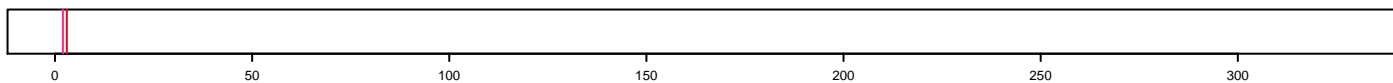

# MOB kinase activator 1B (Q7L9L4-2)

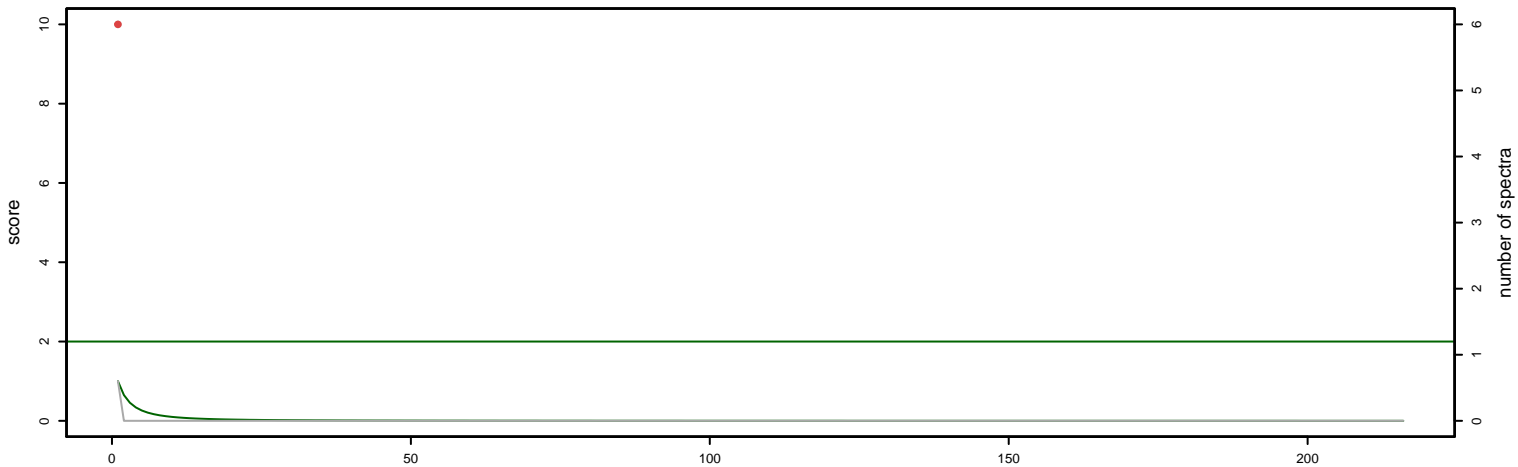

replica

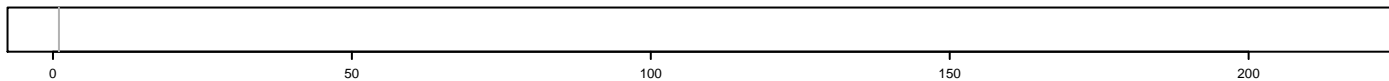

stability

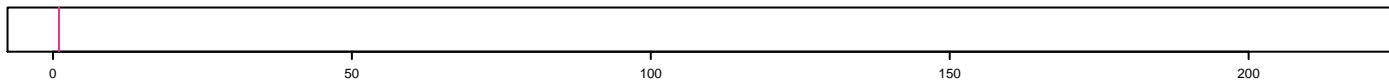

# Lysine-specific demethylase 3B (Q7LBC6)

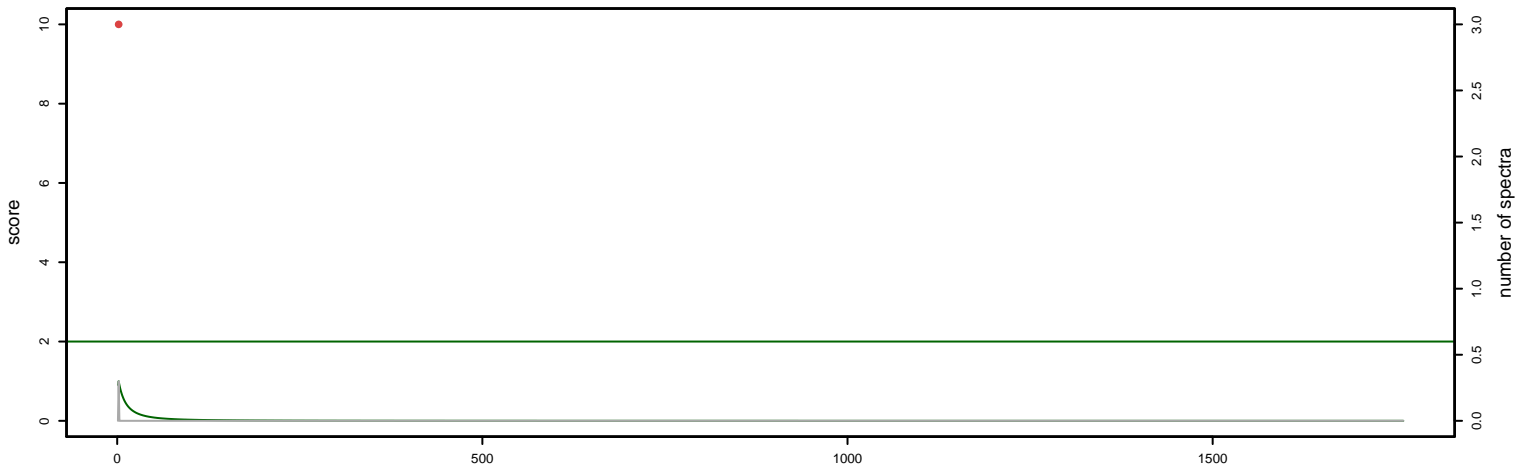

replica

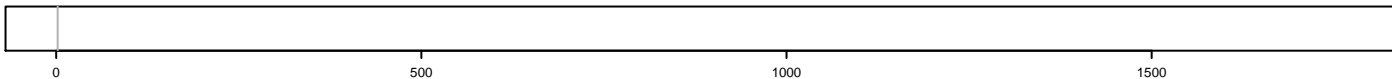

stability

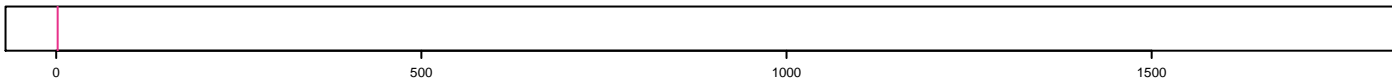

# Protein FAM122B (Q7Z309)

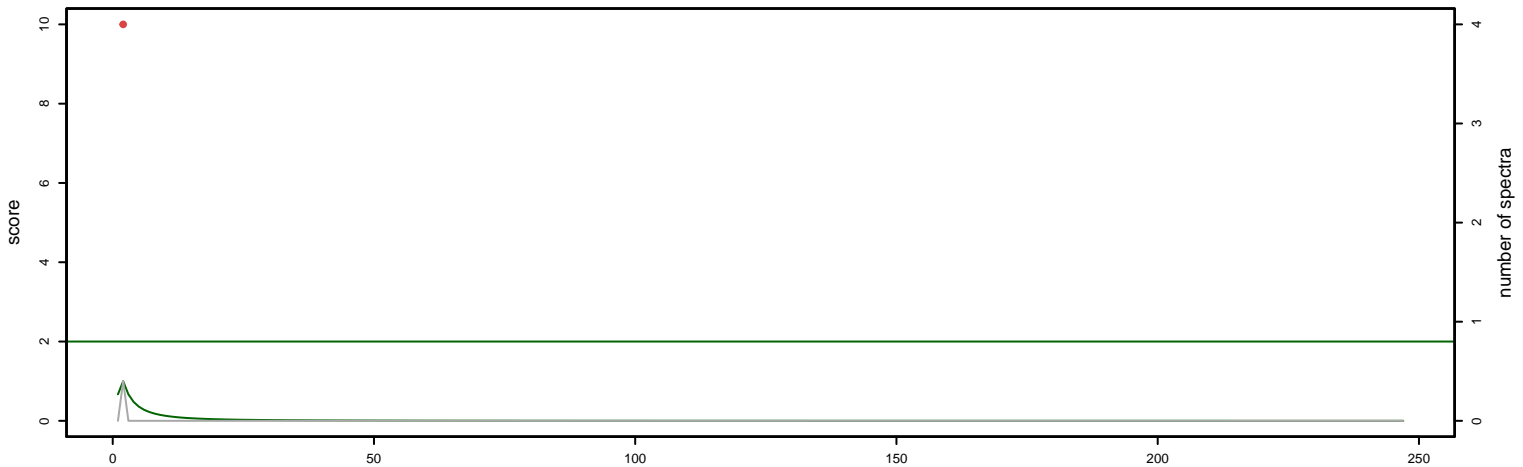

replica

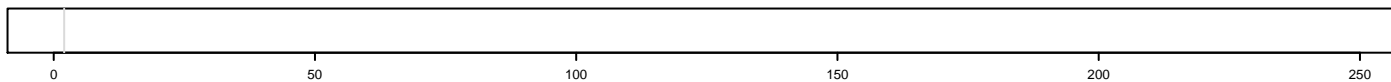

stability

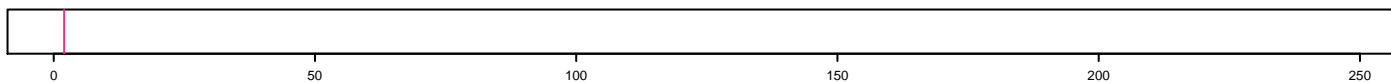



# HD domain-containing protein 2 (Q7Z4H3)

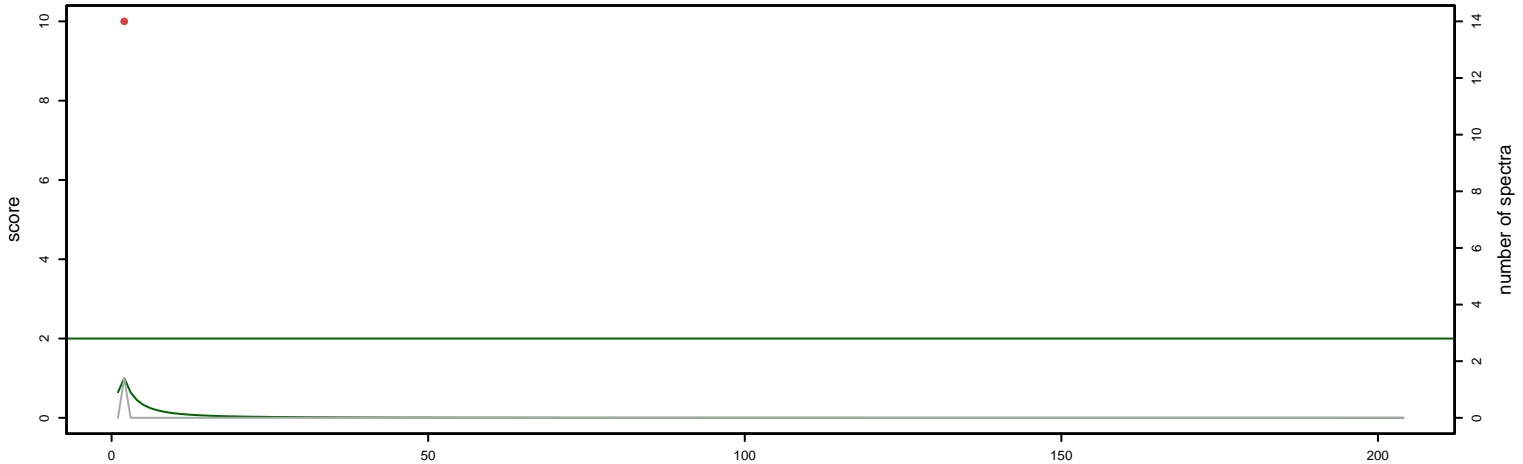

replica

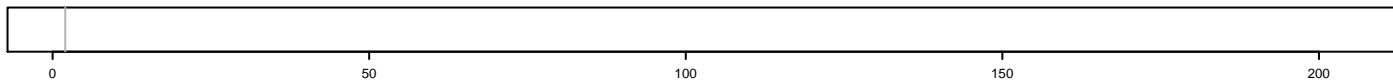

stability

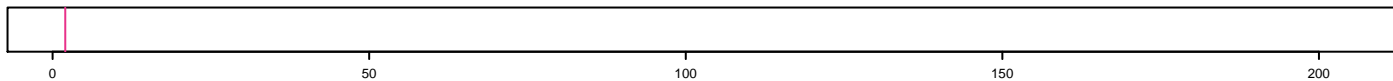

# L-xylulose reductase (Q7Z4W1)

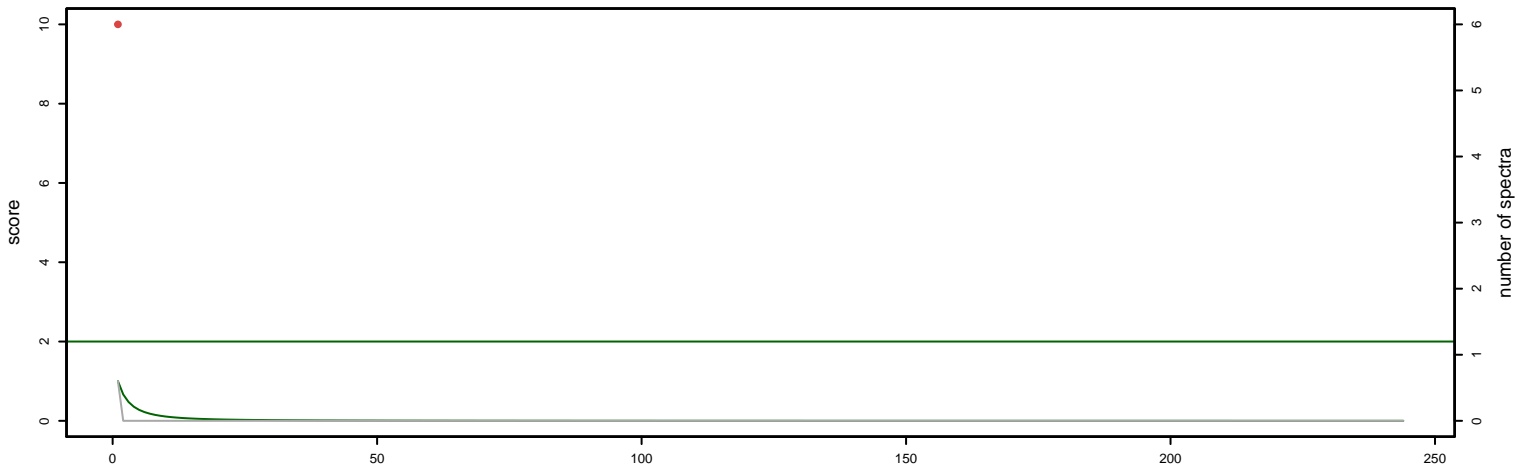

replica

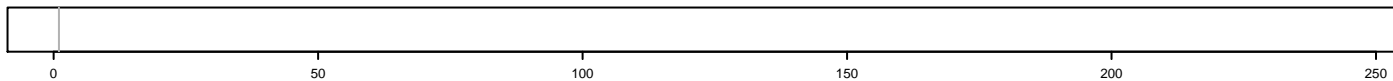

stability

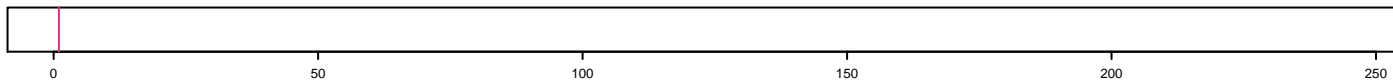

# Dipeptidyl peptidase 9 (Q86T12)

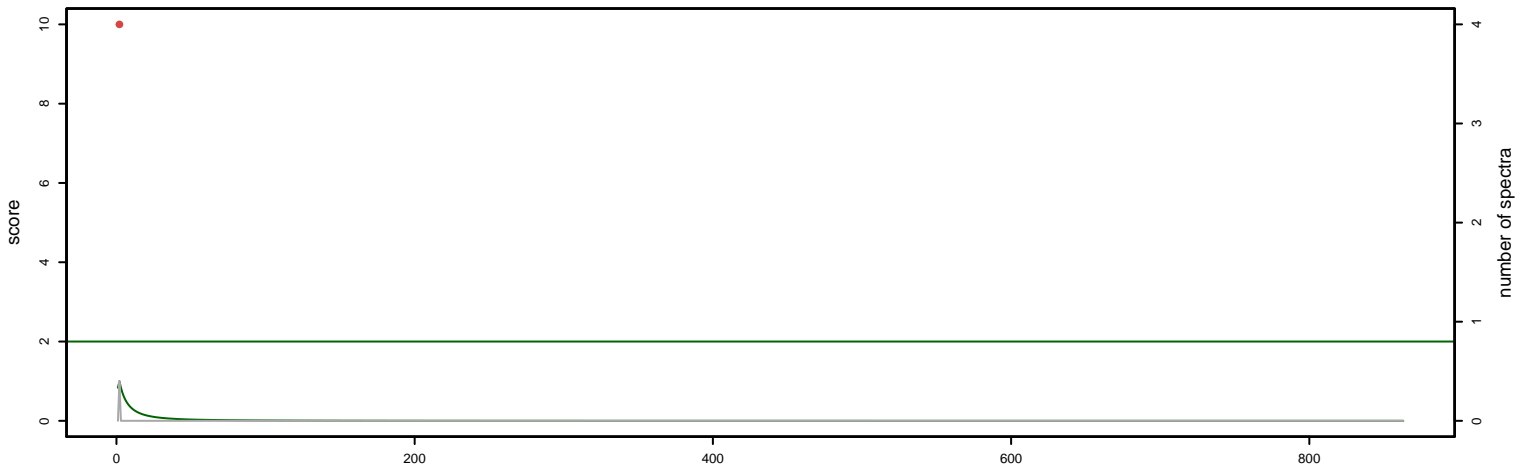

replica

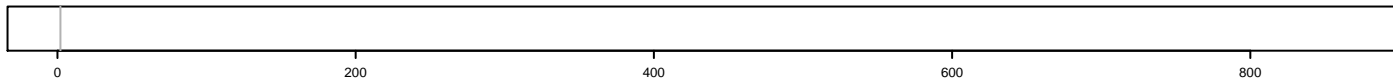

stability

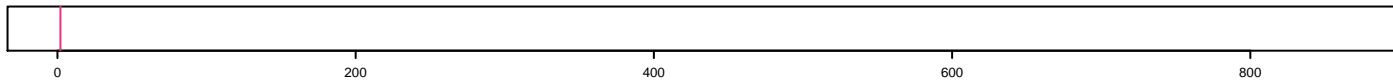

### Protein prune homolog (Q86TP1)

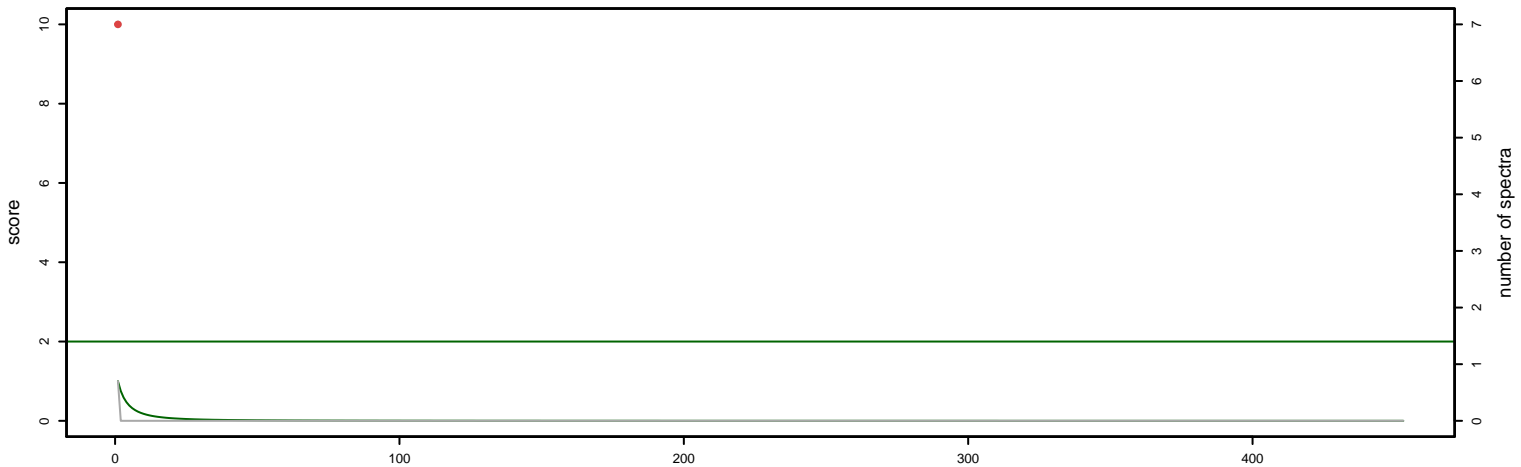

replica

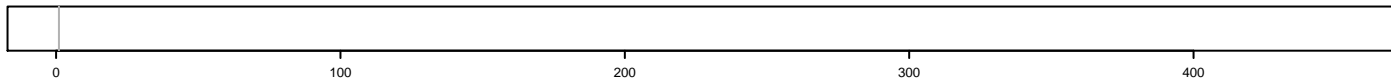

stability

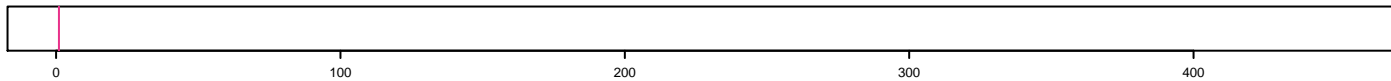

# Leucine-rich repeat transmembrane neuronal protein 1 (Q86UE6)

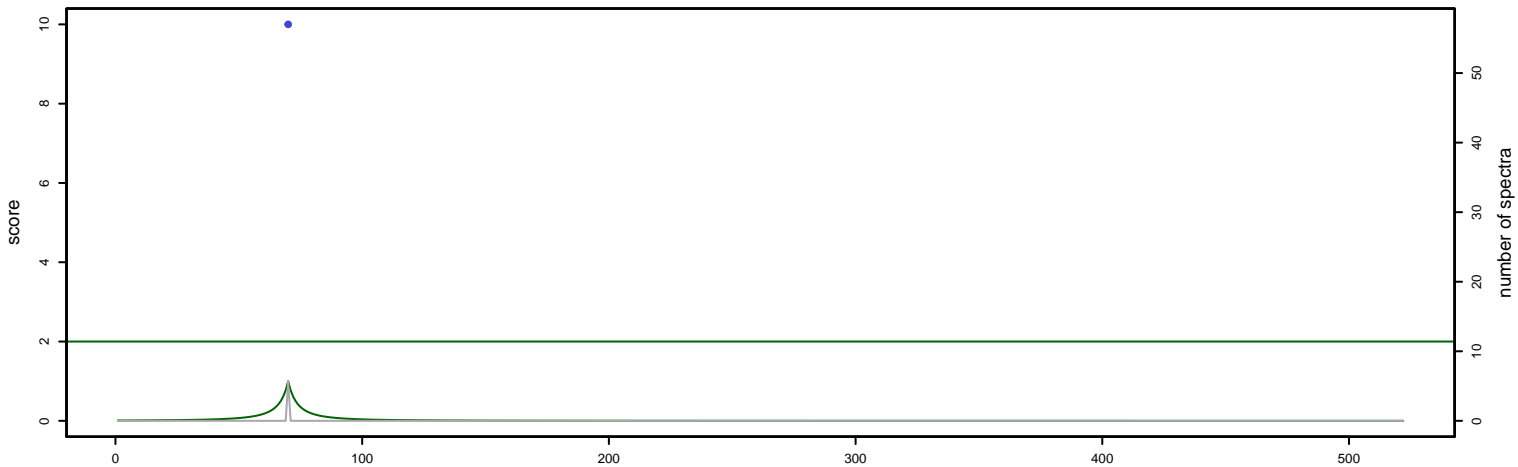

replica

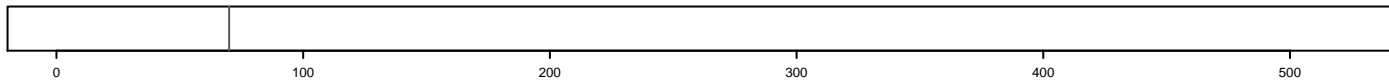

stability

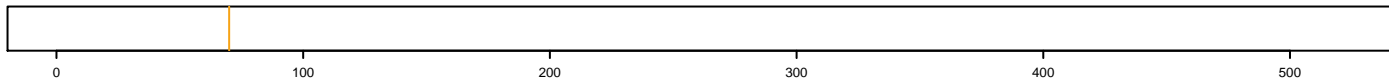

### Fermitin family homolog 3 (Q86UX7)

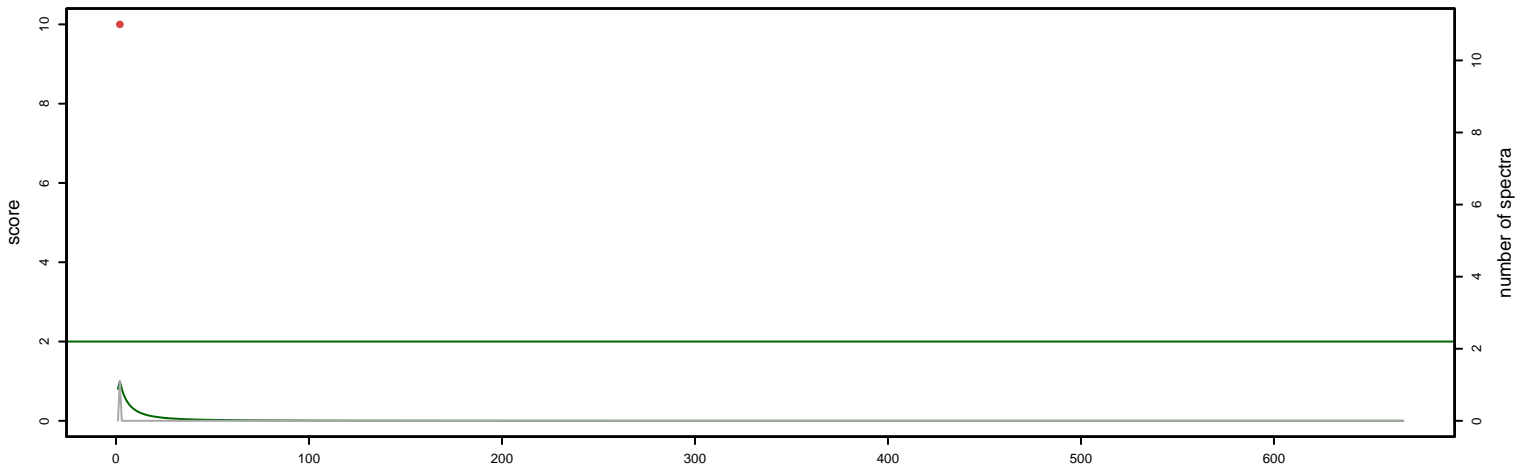

replica

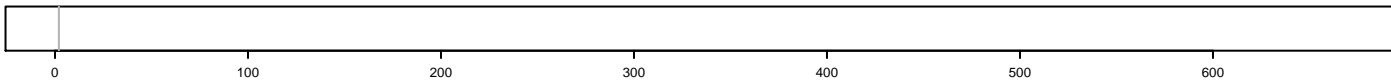

stability

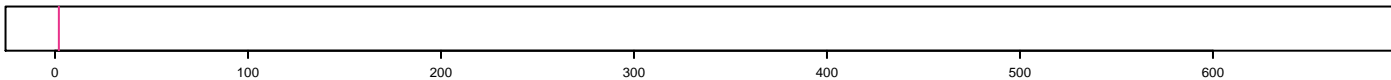

### Cullin-associated NEDD8-dissociated protein 1 (Q86VP6)

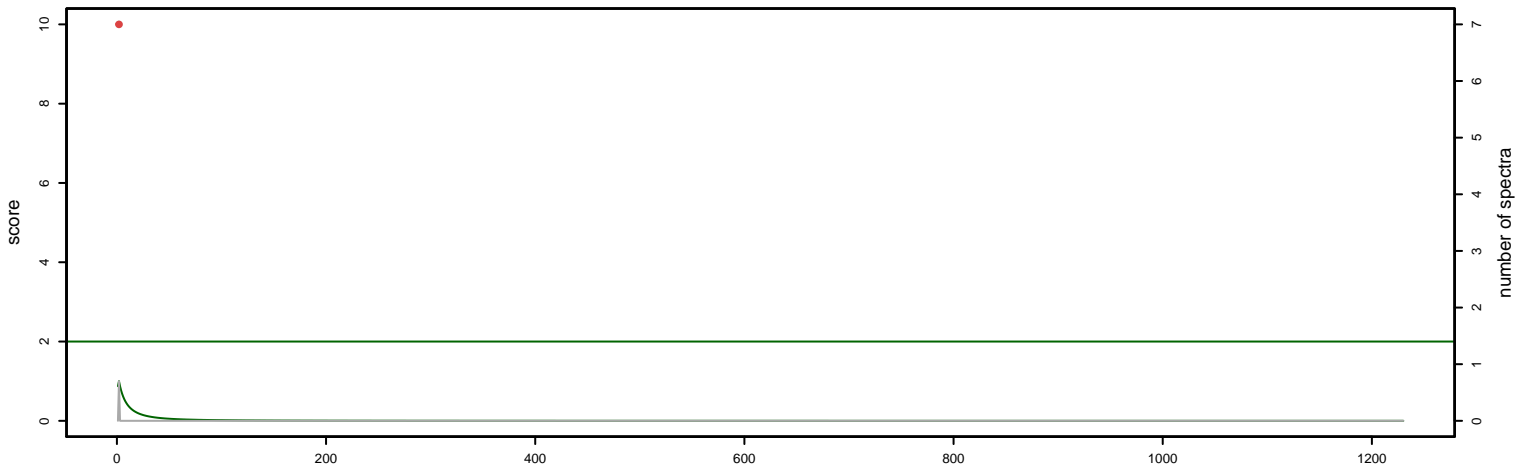

replica

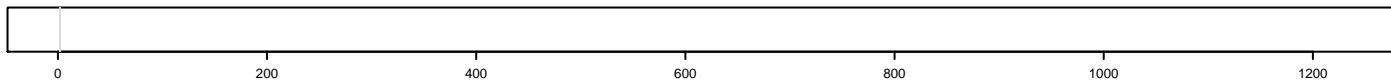

stability

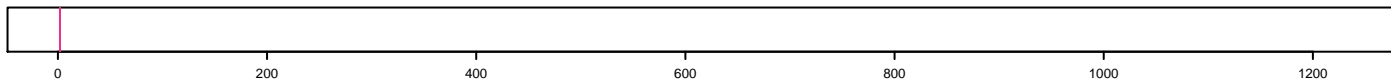

### Nuclear receptor 2C2-associated protein (Q86WQ0)

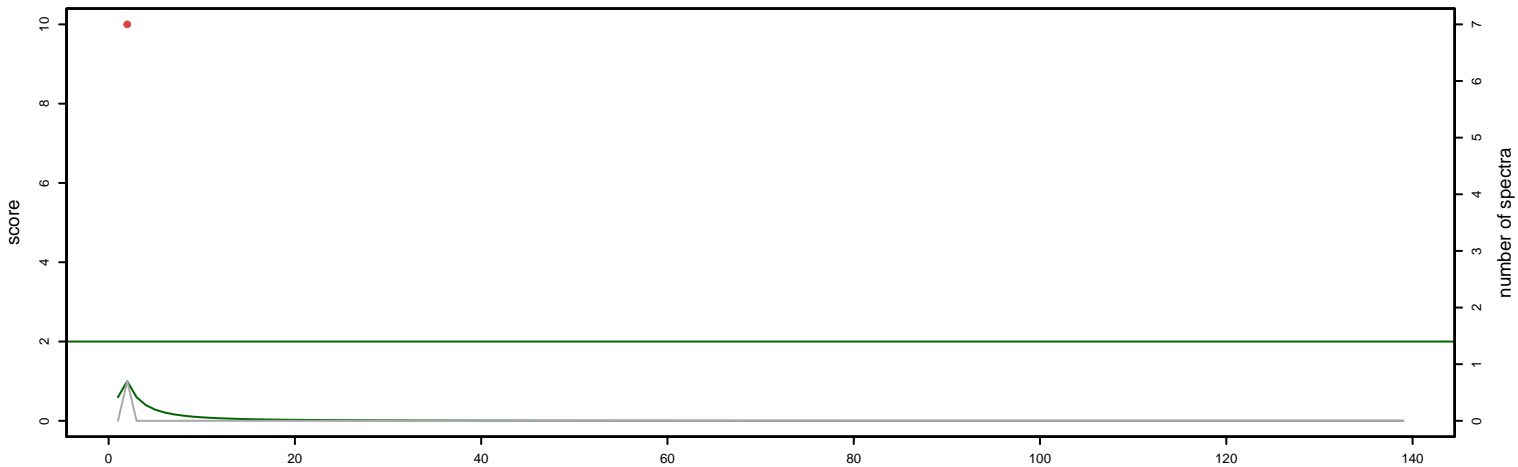

replica

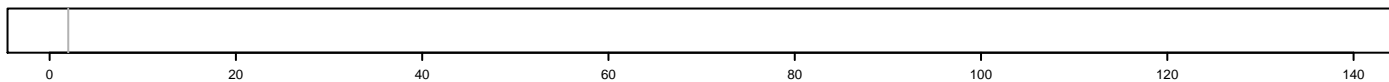

stability

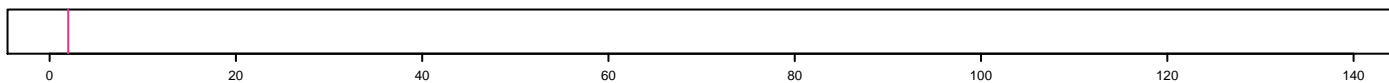



# Histone-arginine methyltransferase CARM1 (Q86X55)

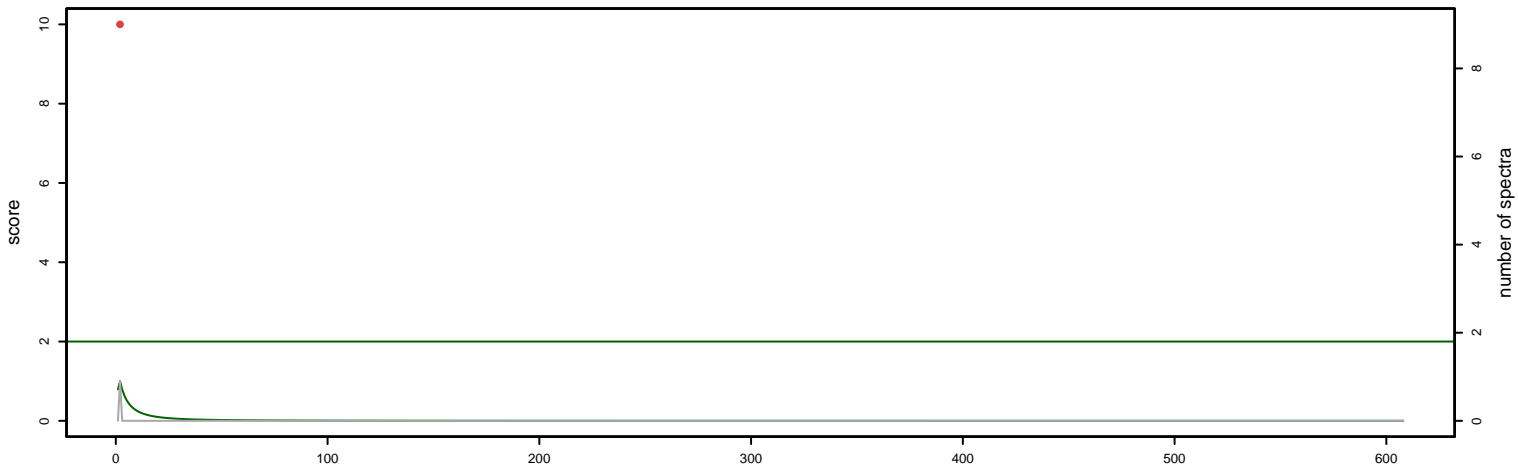

replica

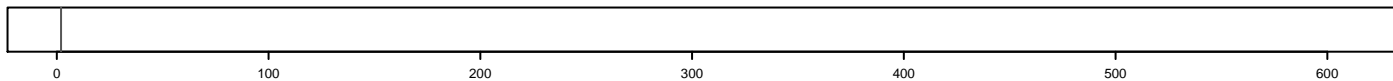

stability

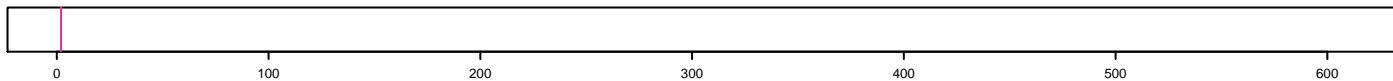

### Cytokine receptor-like factor 3 (Q8IUI8)

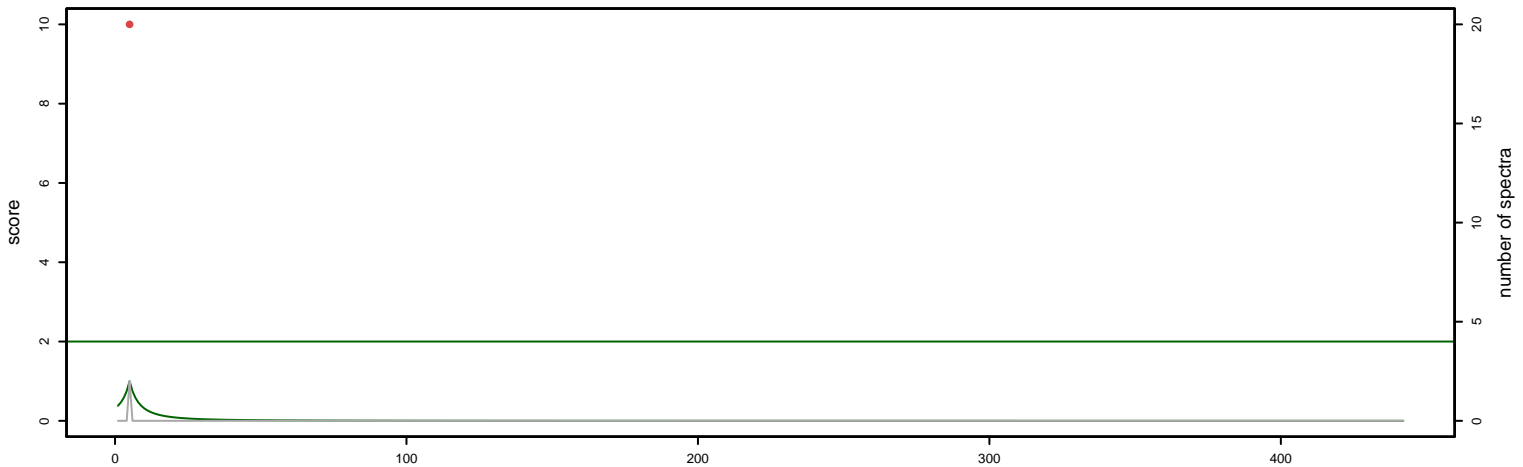

replica

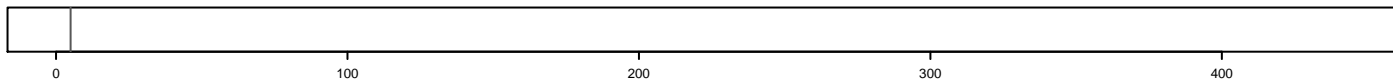

stability

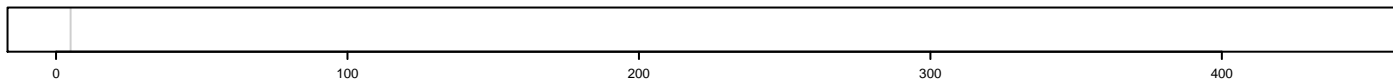

### Cytokine receptor-like factor 3 (Q8IU18-2)

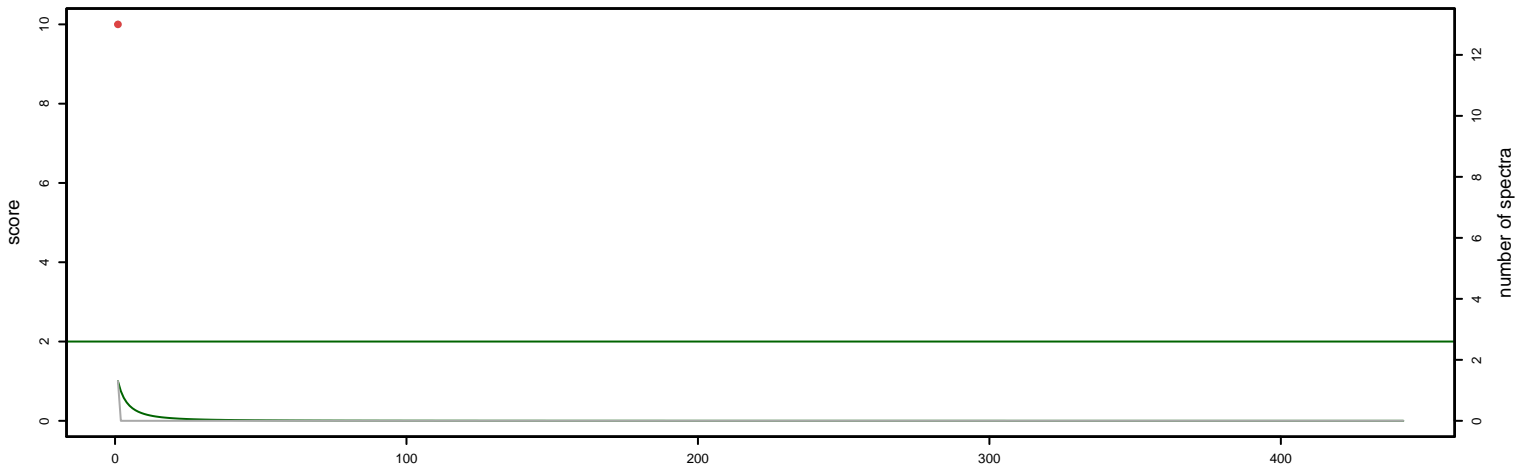

replica

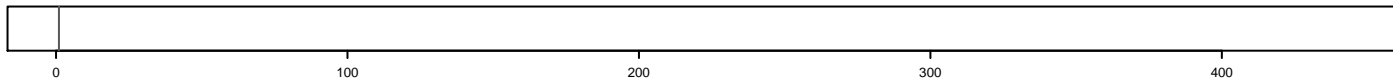

stability

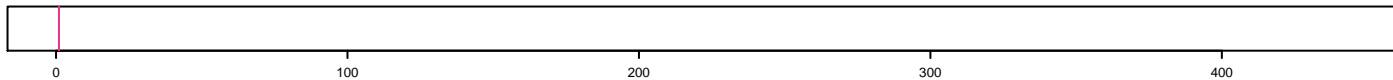

### Armadillo repeat-containing protein 8 (Q8IUR7-2)

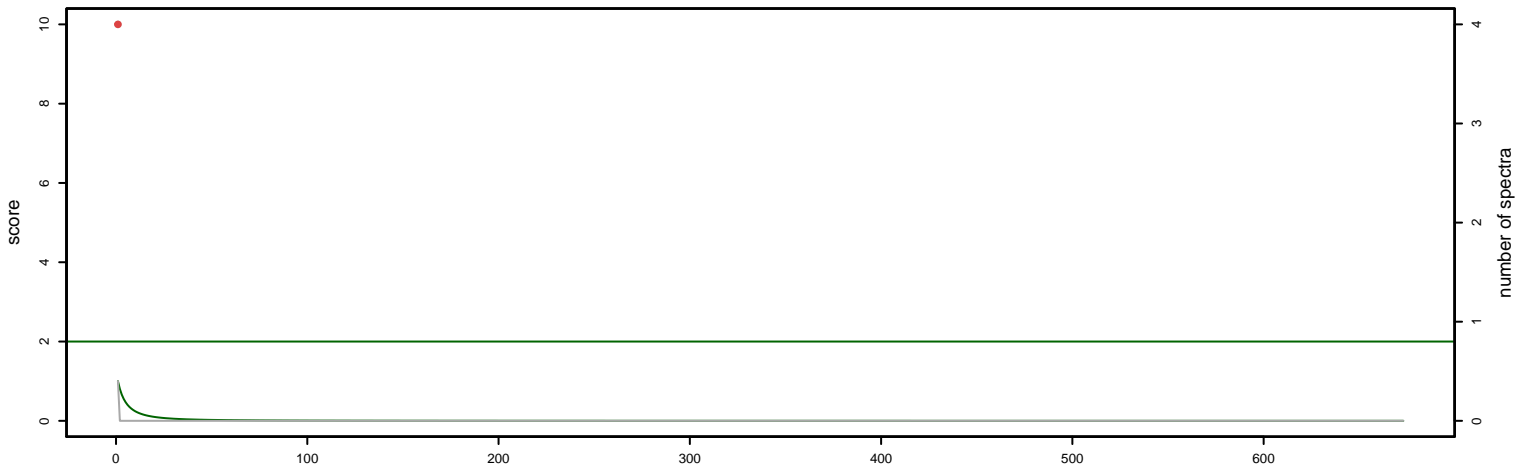

replica

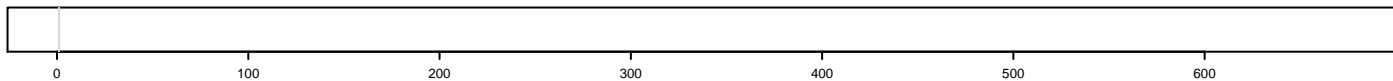

stability

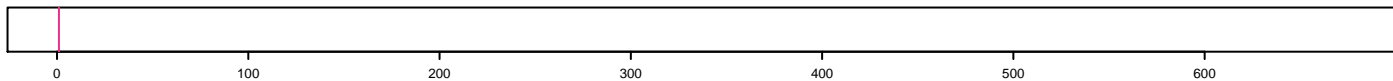

# Protein archease (Q8IWT0)

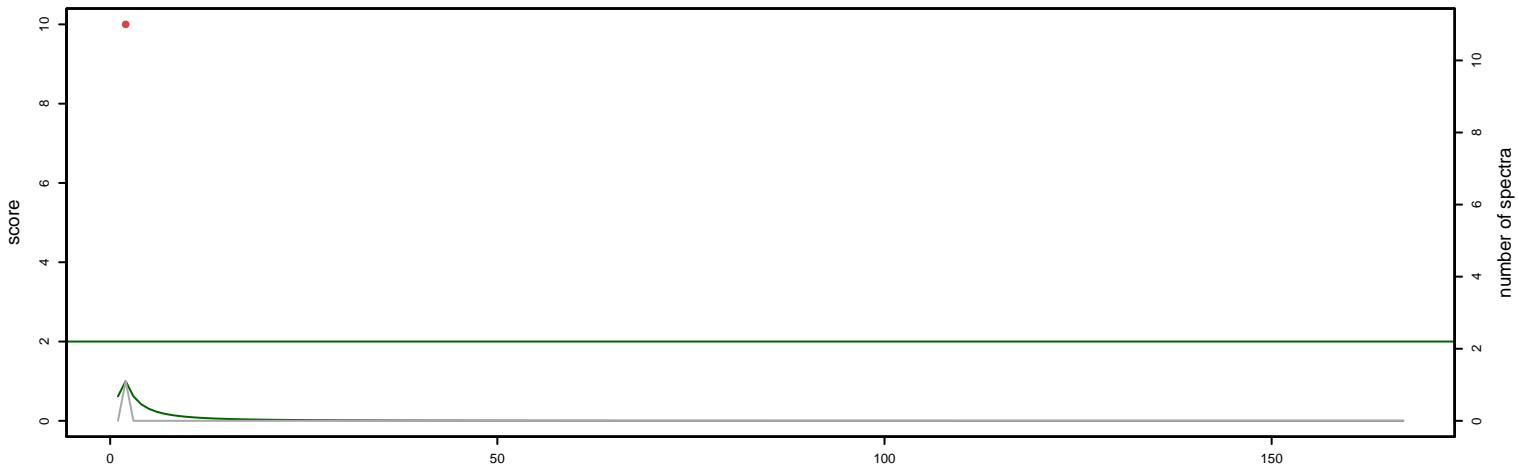

replica

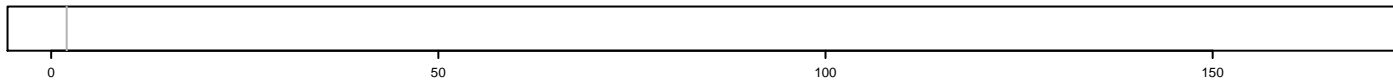

stability

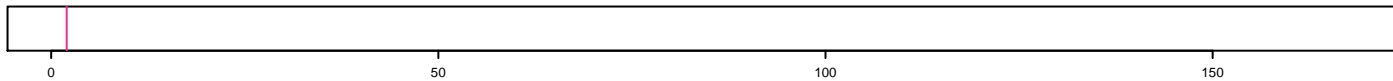

# Uncharacterized protein C9orf40 (Q8IXQ3)

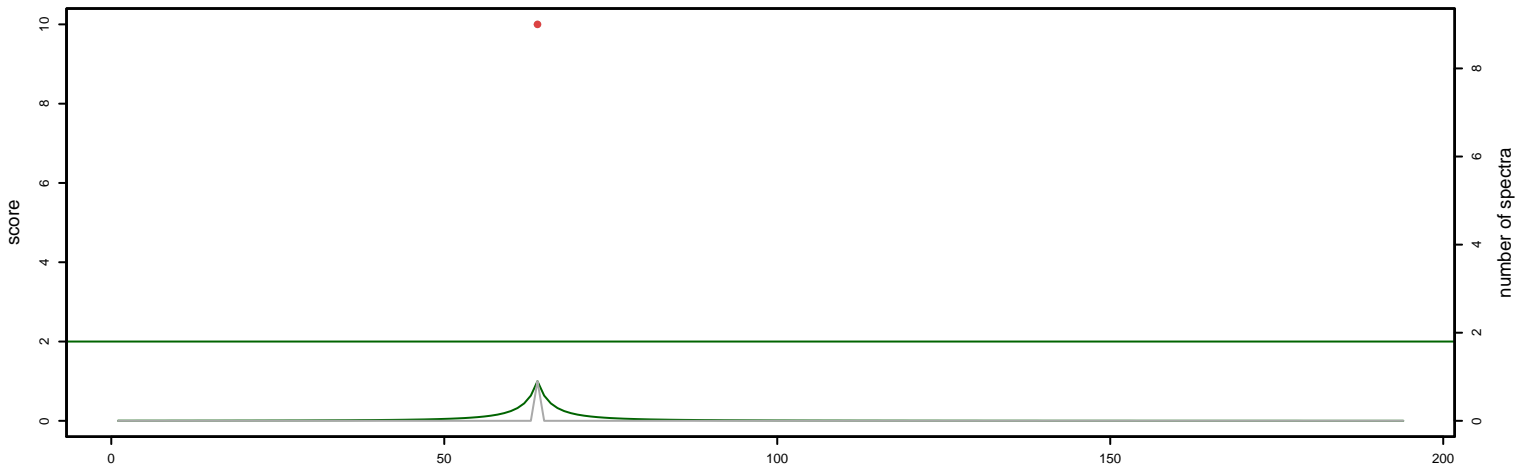

replica

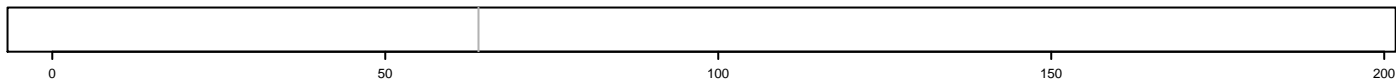

stability

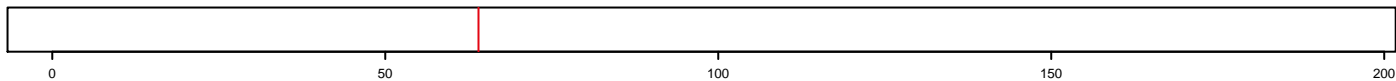

# ORM1-like protein 3 (Q8N138)

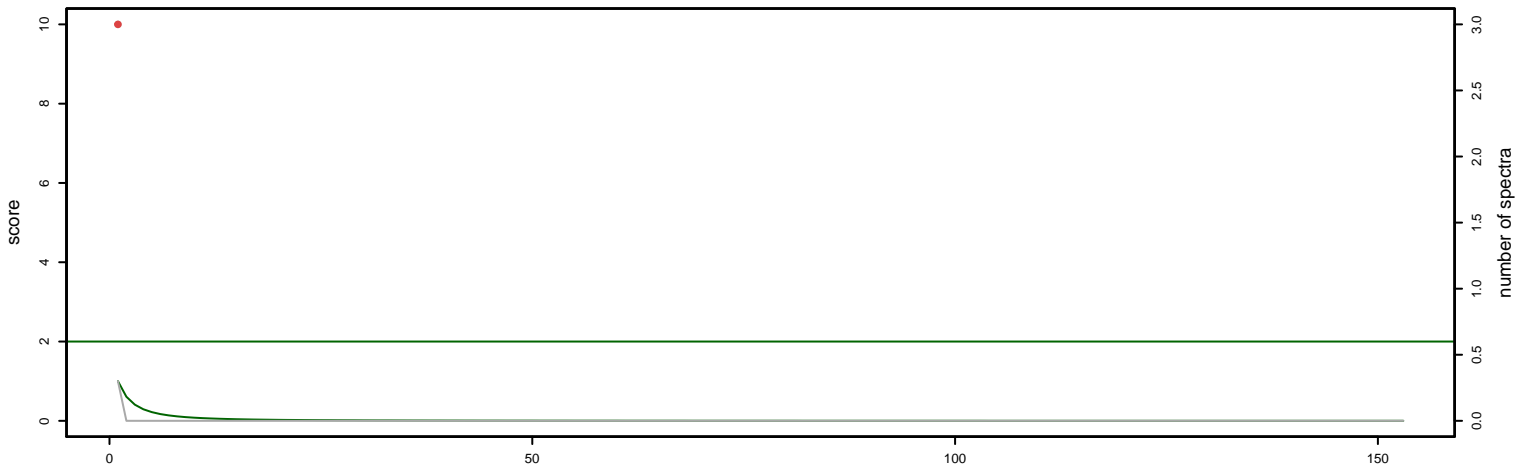

replica

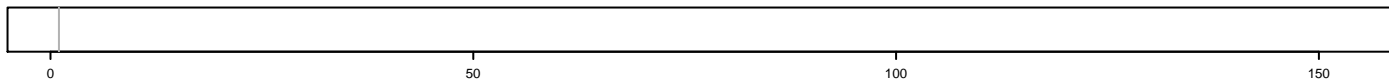

stability

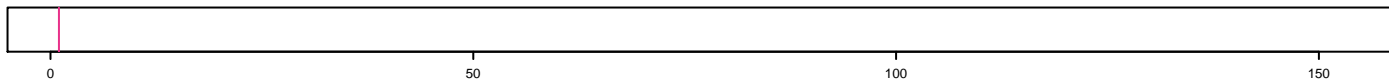

# Large neutral amino acids transporter small subunit 4 (Q8N370)

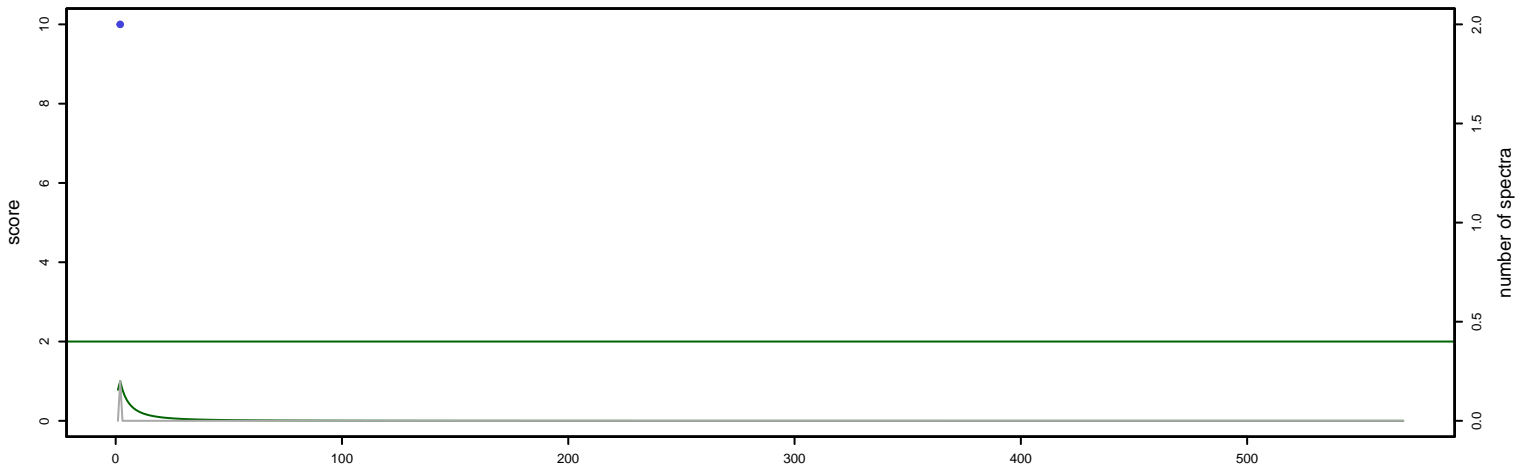

replica

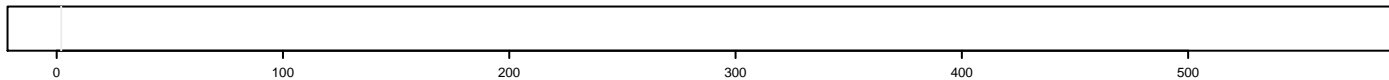

stability

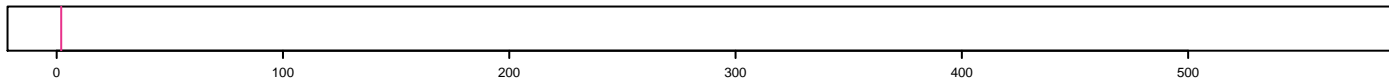



# Lysine-specific demethylase 8 (Q8N371)

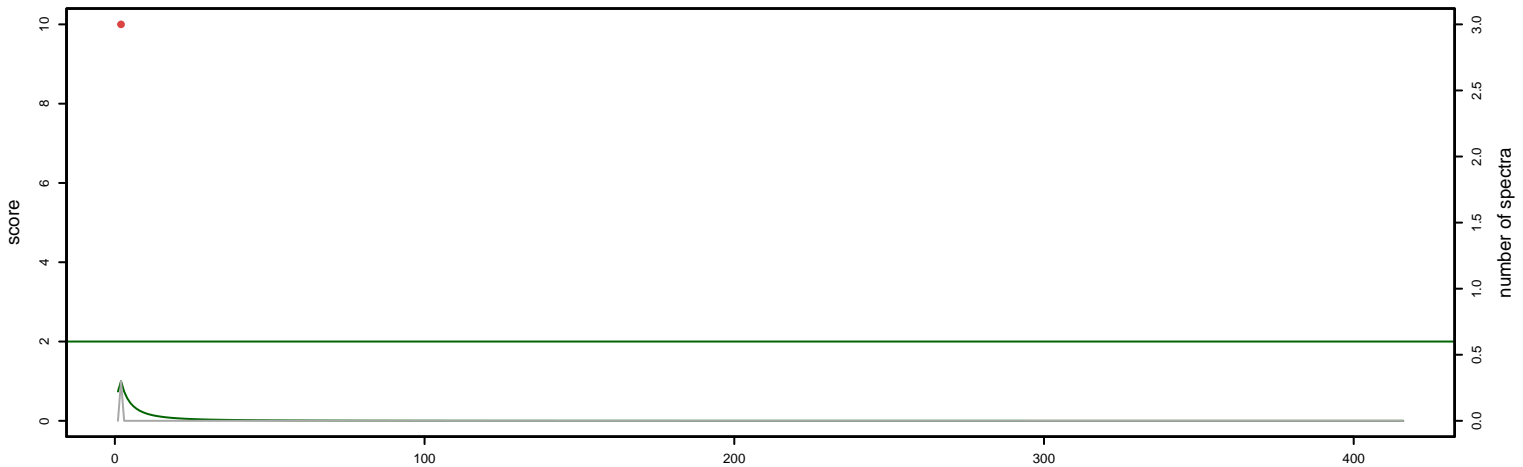

replica

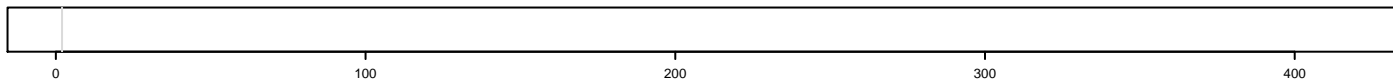

stability

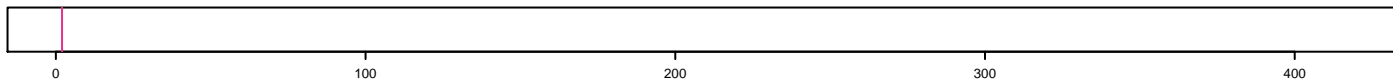

# Guanosine-3,5-bis(diphosphate) 3-pyrophosphohydrolase MESH1 (Q8N4P3)

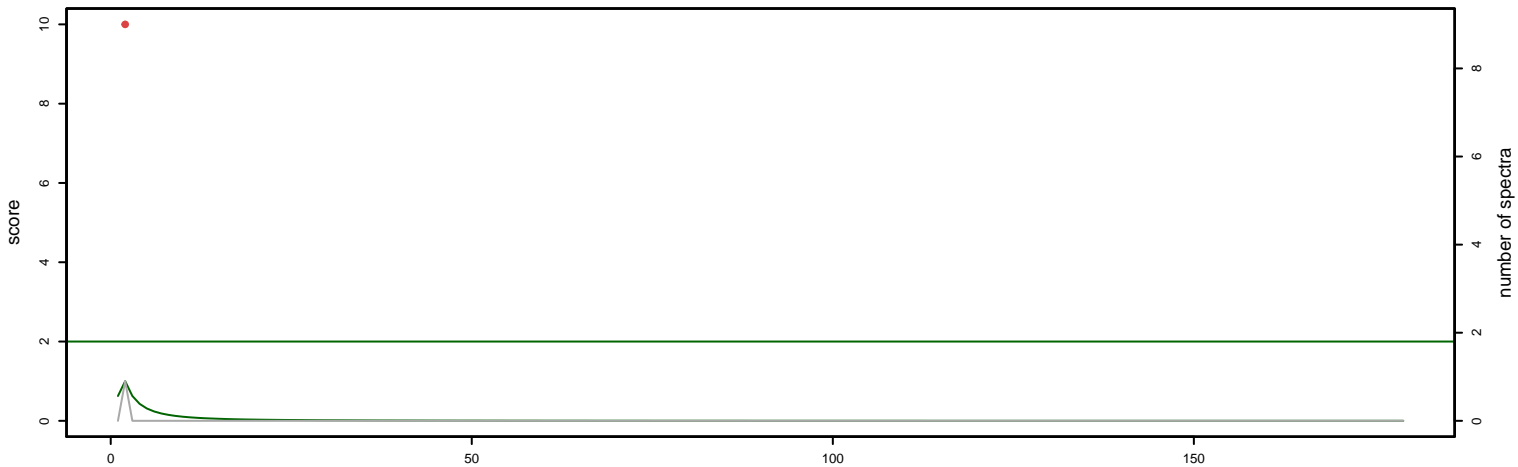

replica

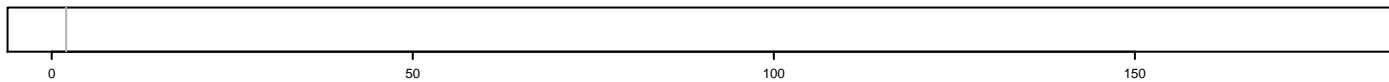

stability

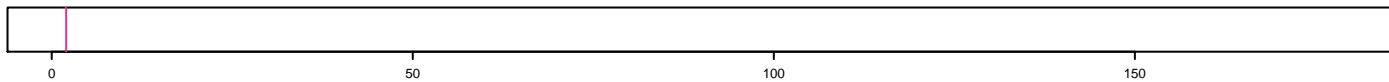

# Rieske domain-containing protein (Q8TAC1)

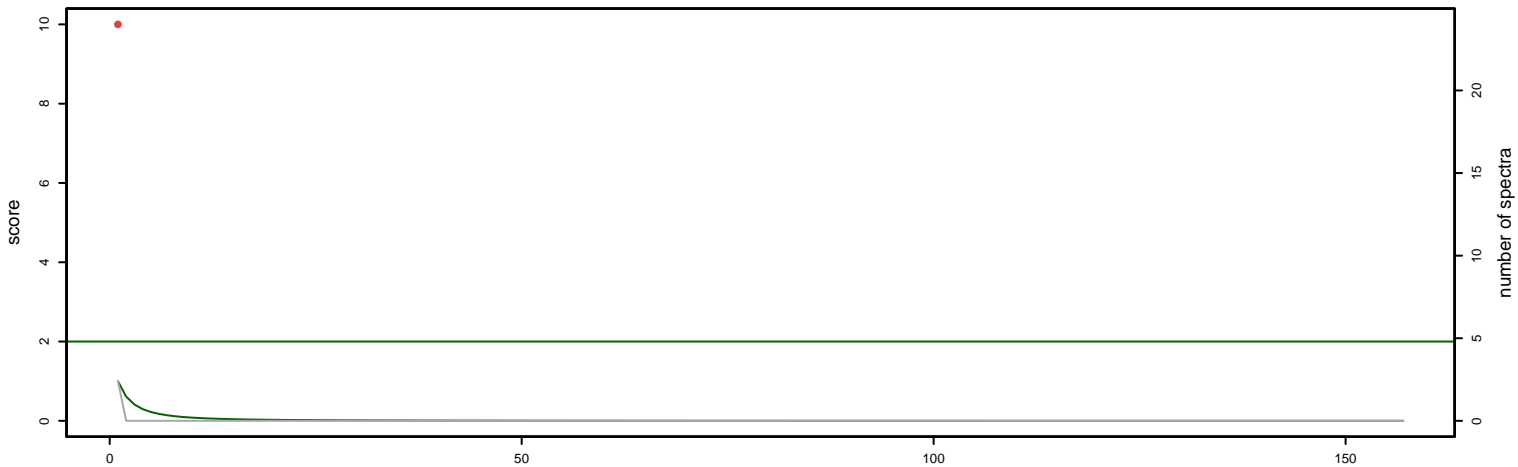

replica

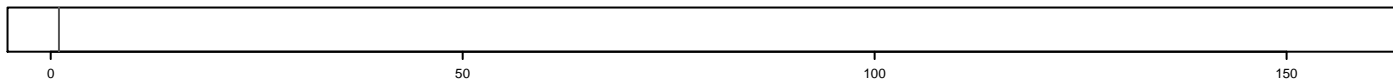

stability

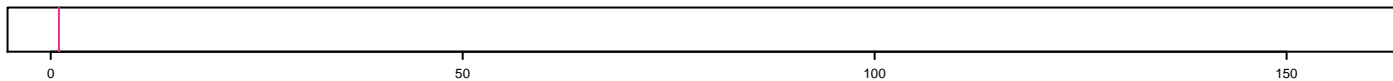

# Uncharacterized protein CXorf38 (Q8TB03)

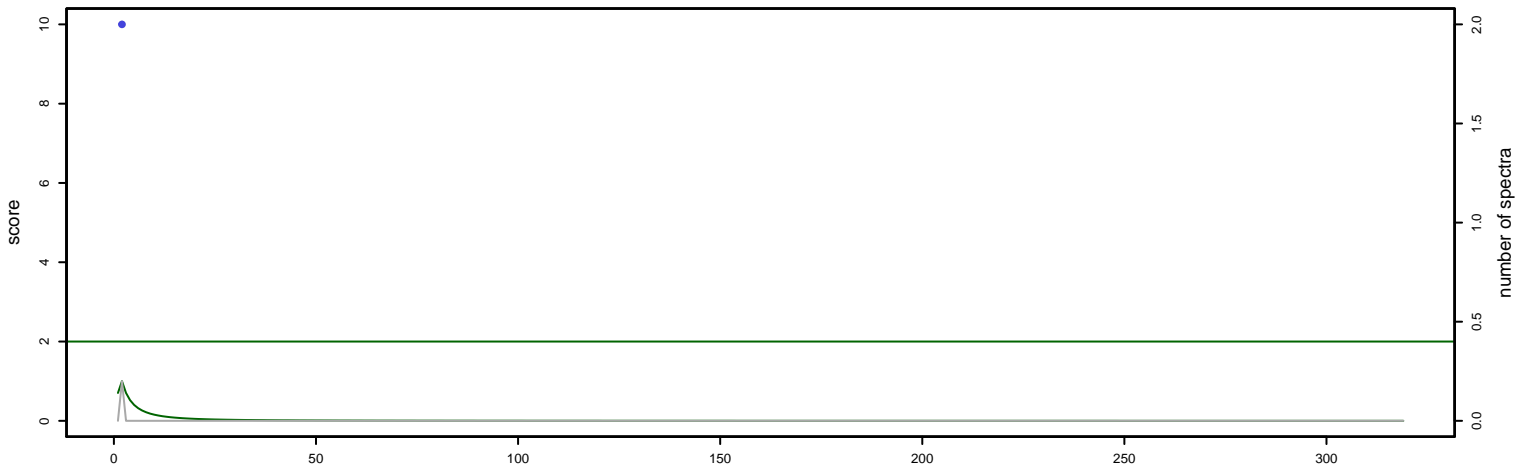

replica

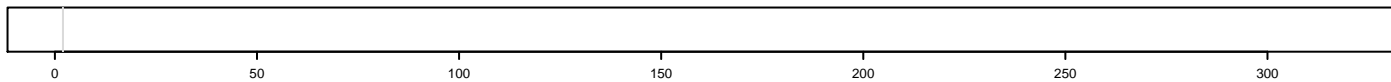

stability

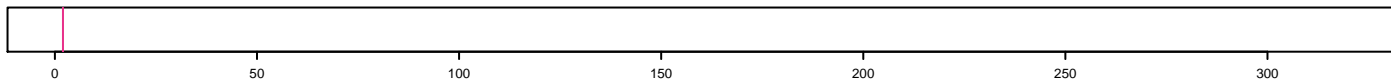

# NEDD8-activating enzyme E1 catalytic subunit (Q8TBC4-2)

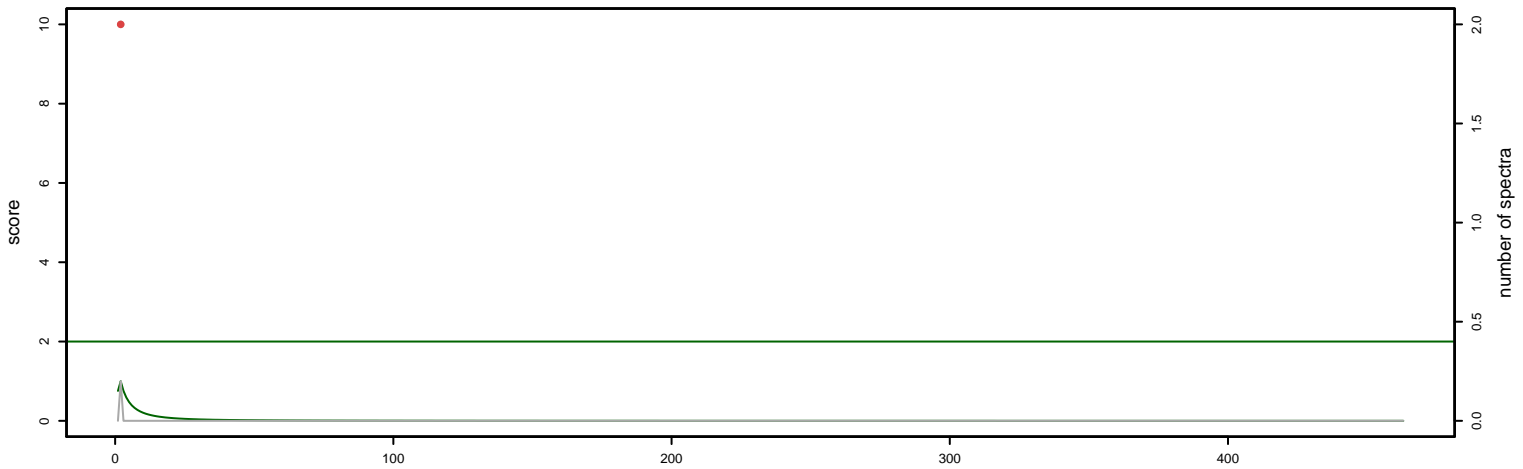

replica

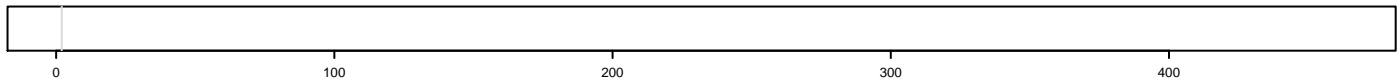

stability

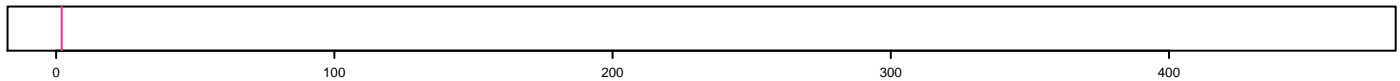

# Guanine nucleotide exchange factor for Rab-3A (Q8TBN0-2)

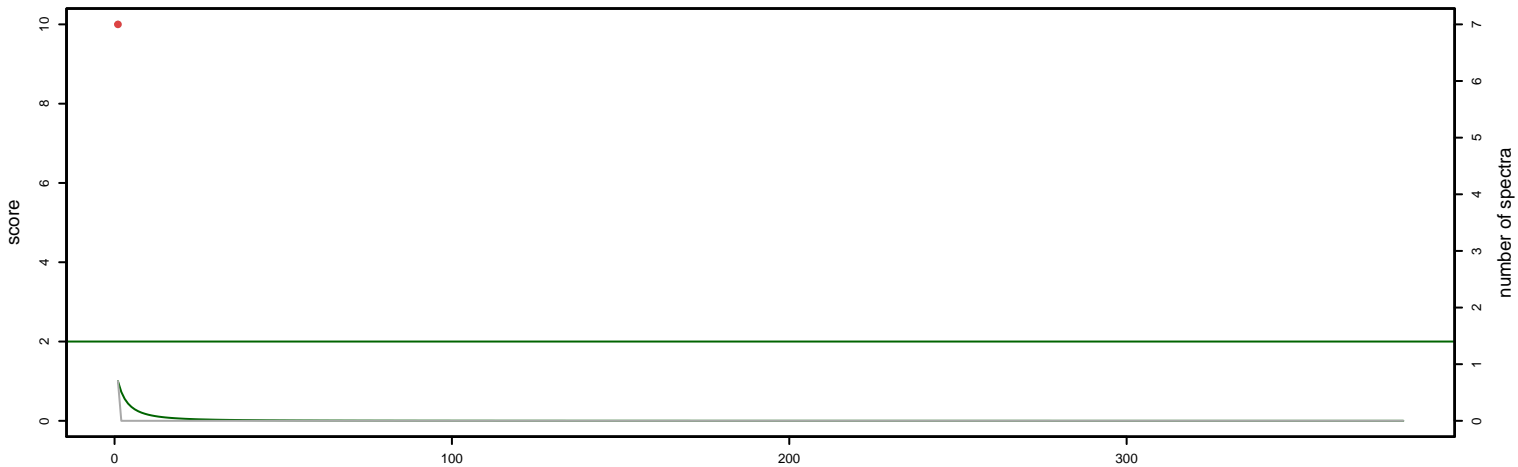

replica

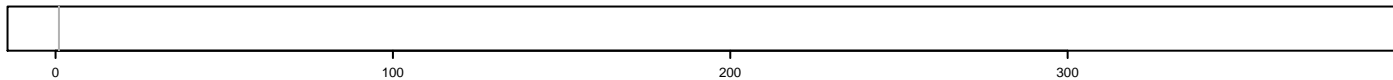

stability

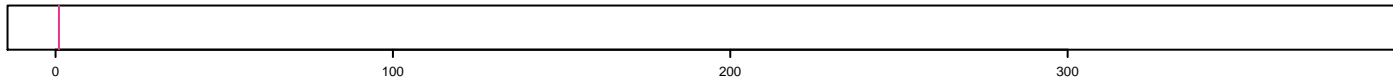

# AN1-type zinc finger protein 1 (Q8TCF1)

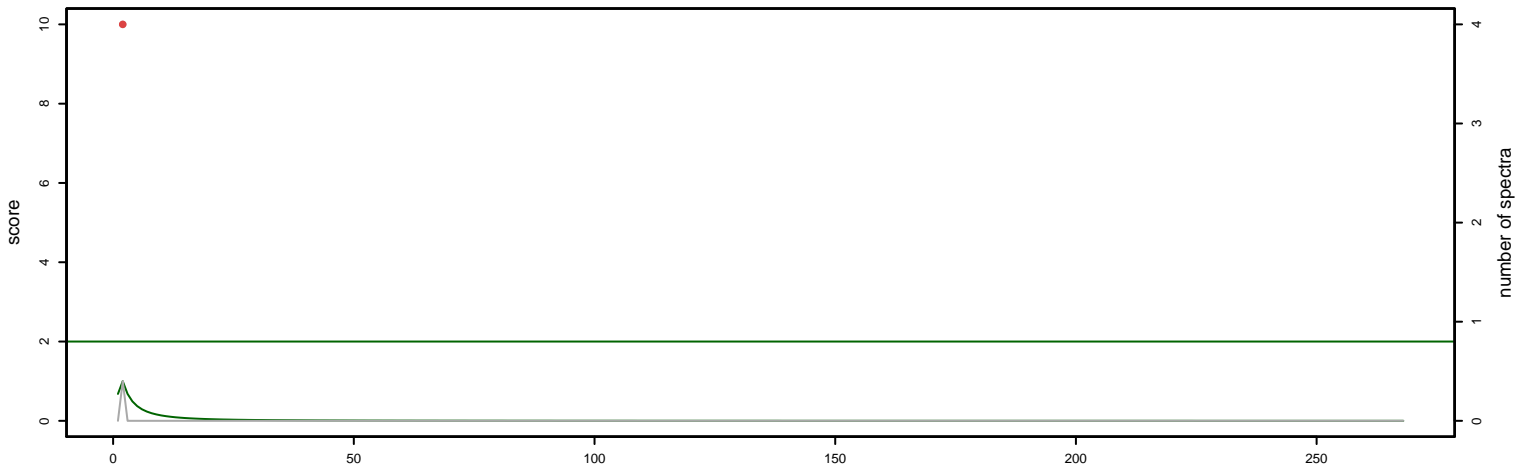

replica

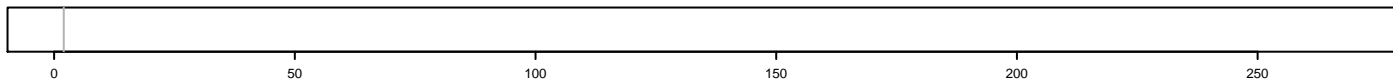

stability

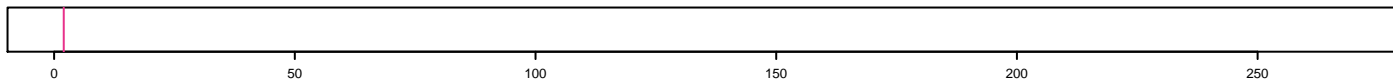

### Importin-4 (Q8TEX9)

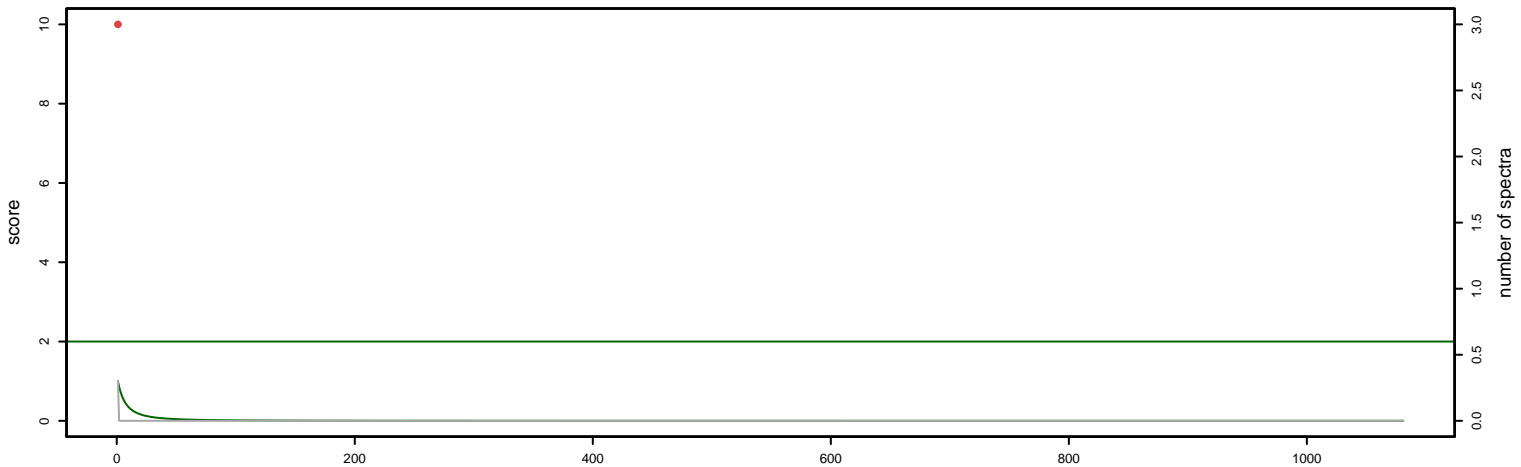

replica

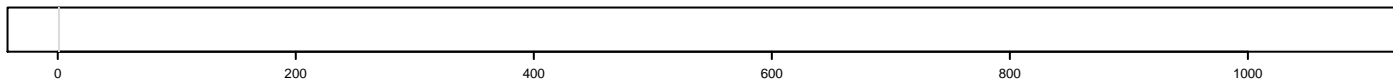

stability

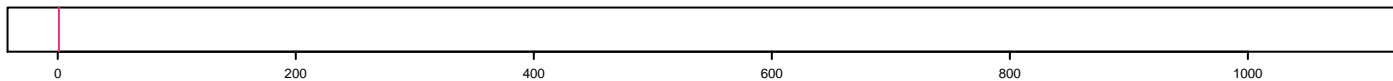



# Monocarboxylate transporter 10 (Q8TF71)

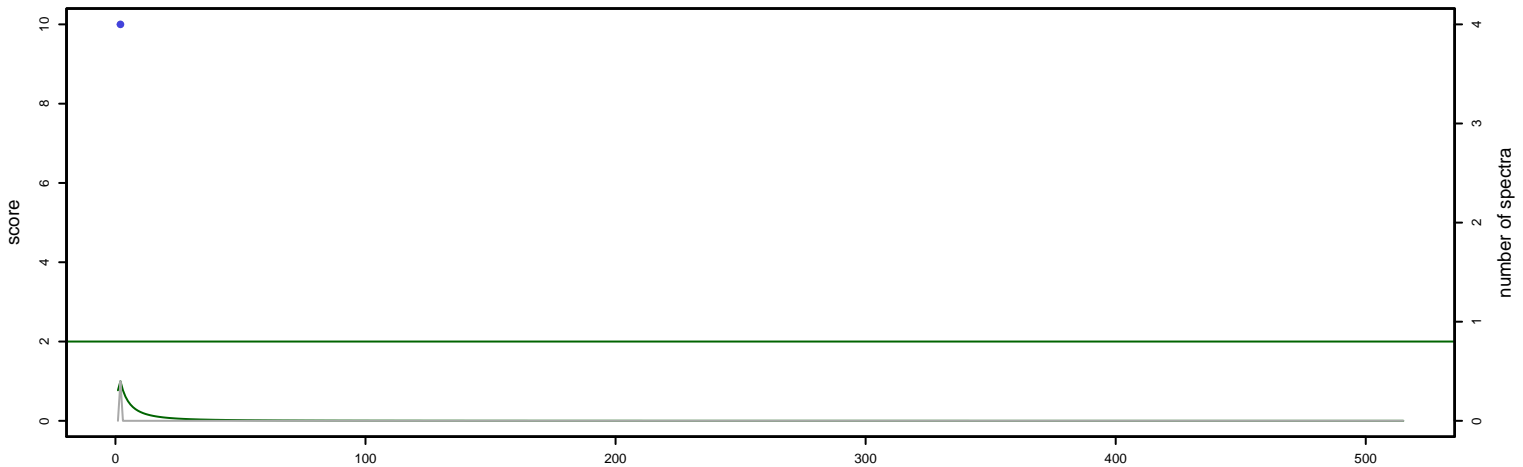

replica

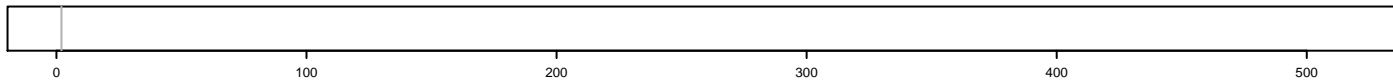

stability

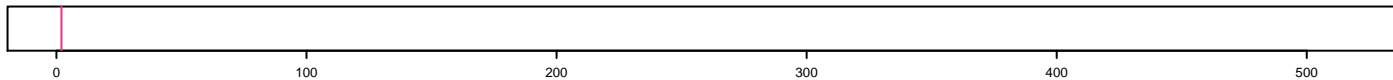

# Programmed cell death 6-interacting protein (Q8WUM4)

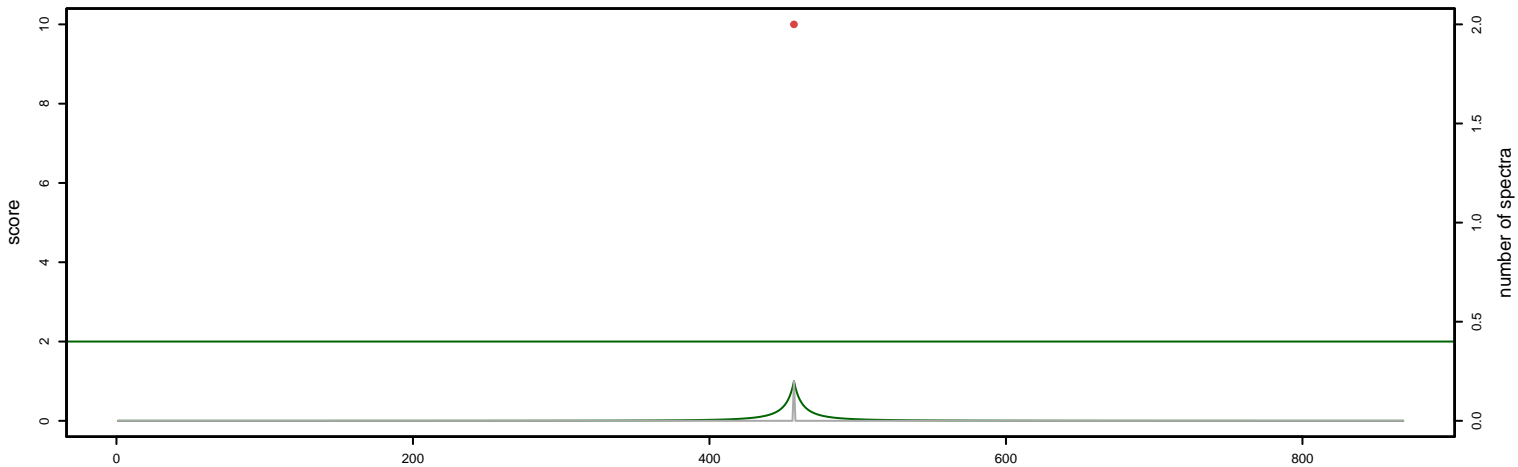

replica

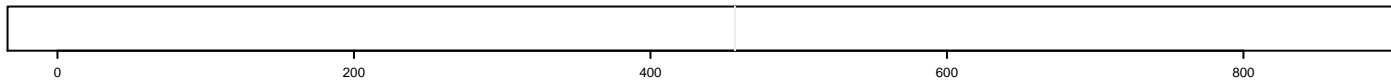

stability

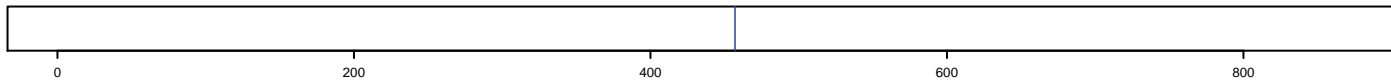

### Sec1 family domain-containing protein 1 (Q8WVM8)

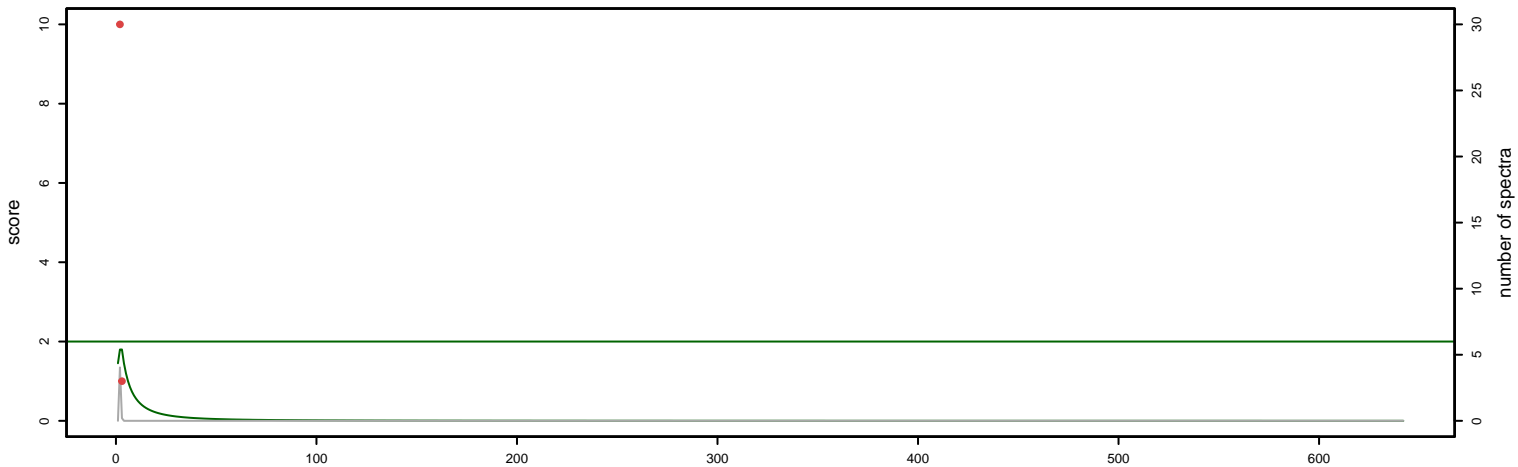

replica

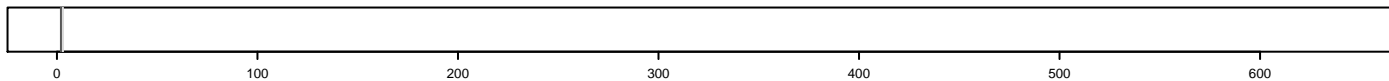

stability

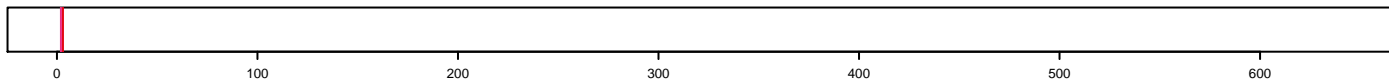

### DnaJ homolog subfamily A member 4 (Q8WW22-2)

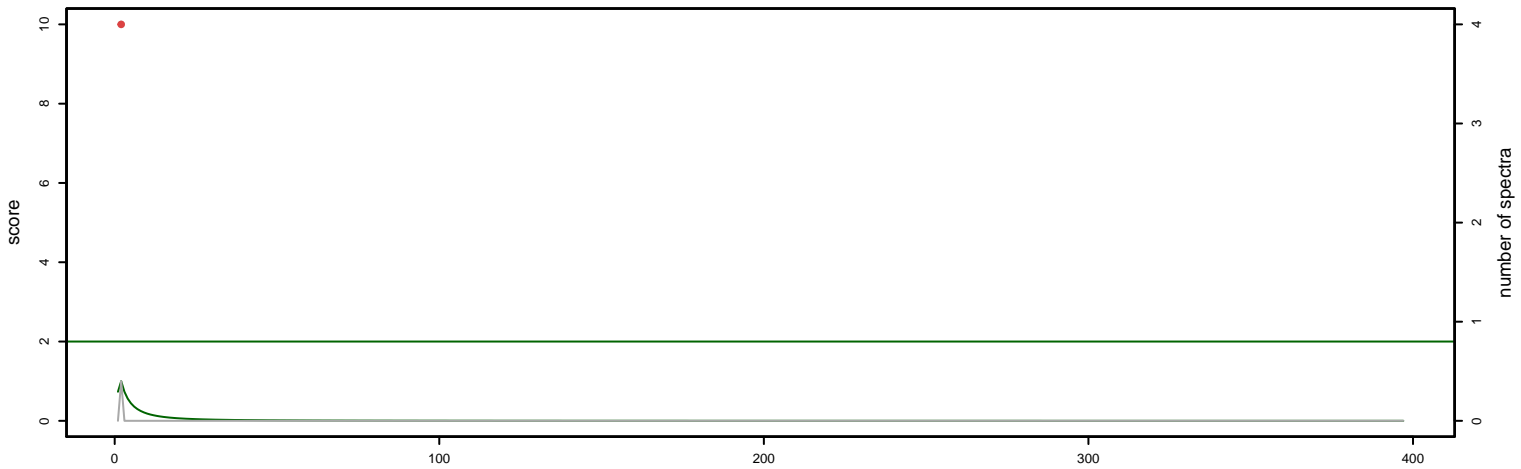

replica

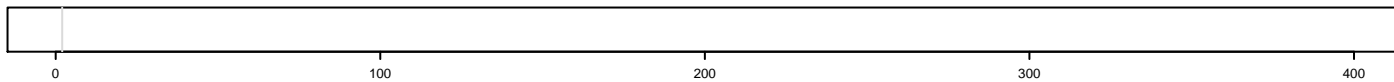

stability

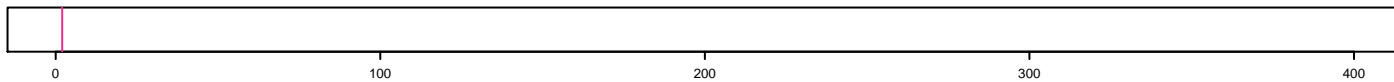

# Proteasome inhibitor PI31 subunit (Q92530)

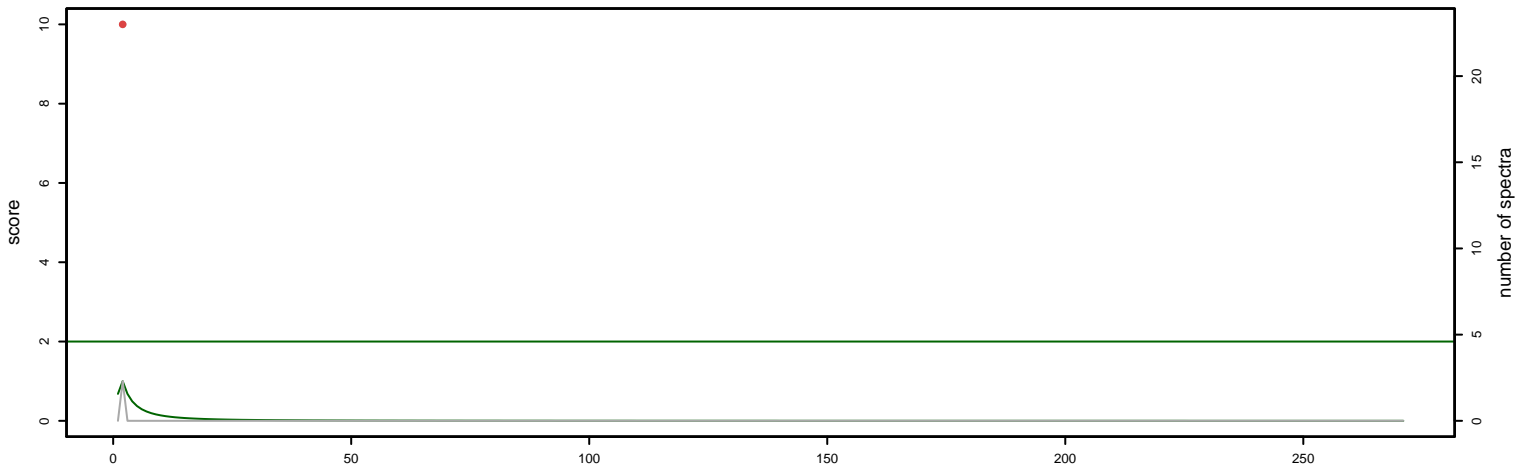

replica

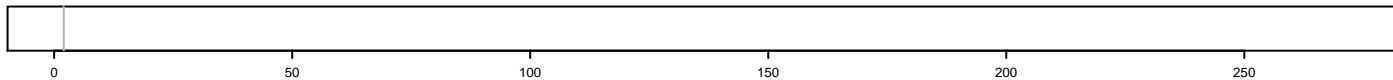

stability

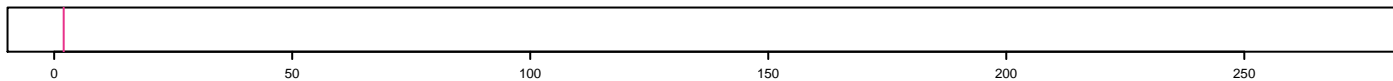

### Osteoclast-stimulating factor 1 (Q92882)

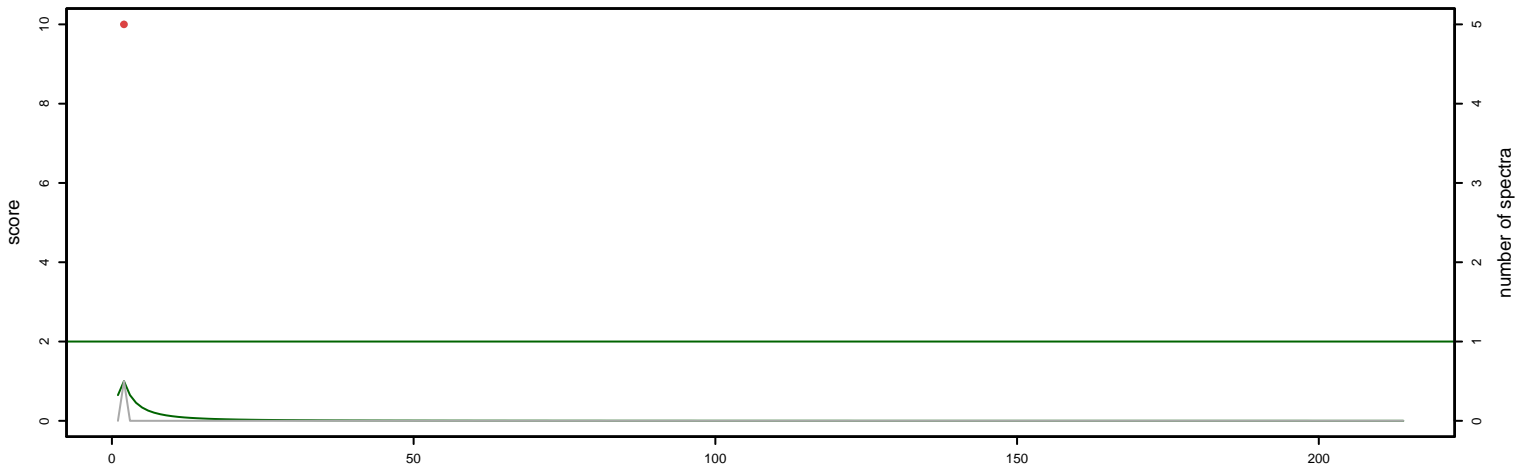

replica

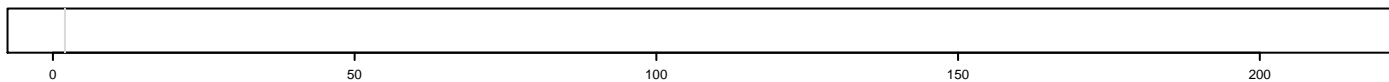

stability

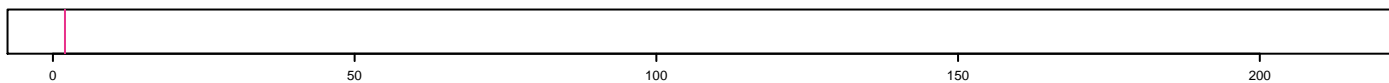

# Glomulin (Q92990)

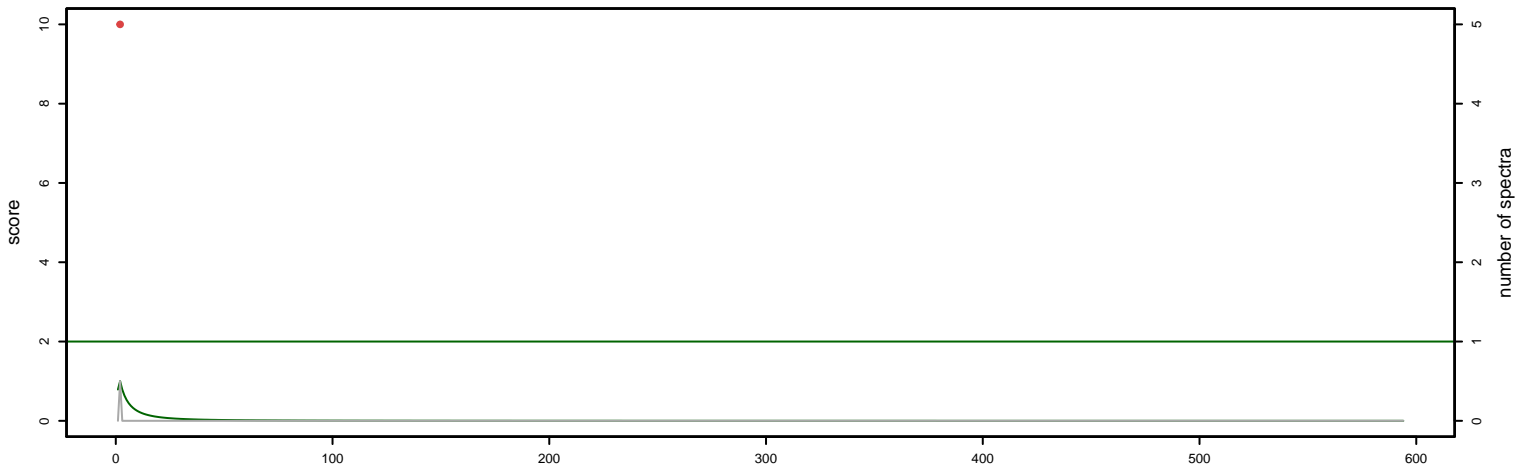

## replica

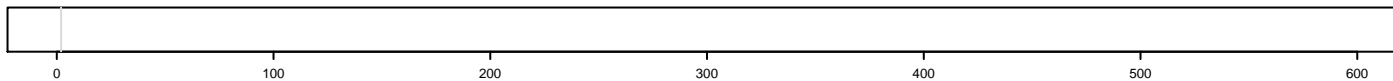

## stability

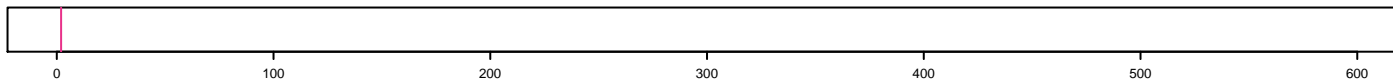

# Ubiquitin carboxyl-terminal hydrolase 7 (Q93009)

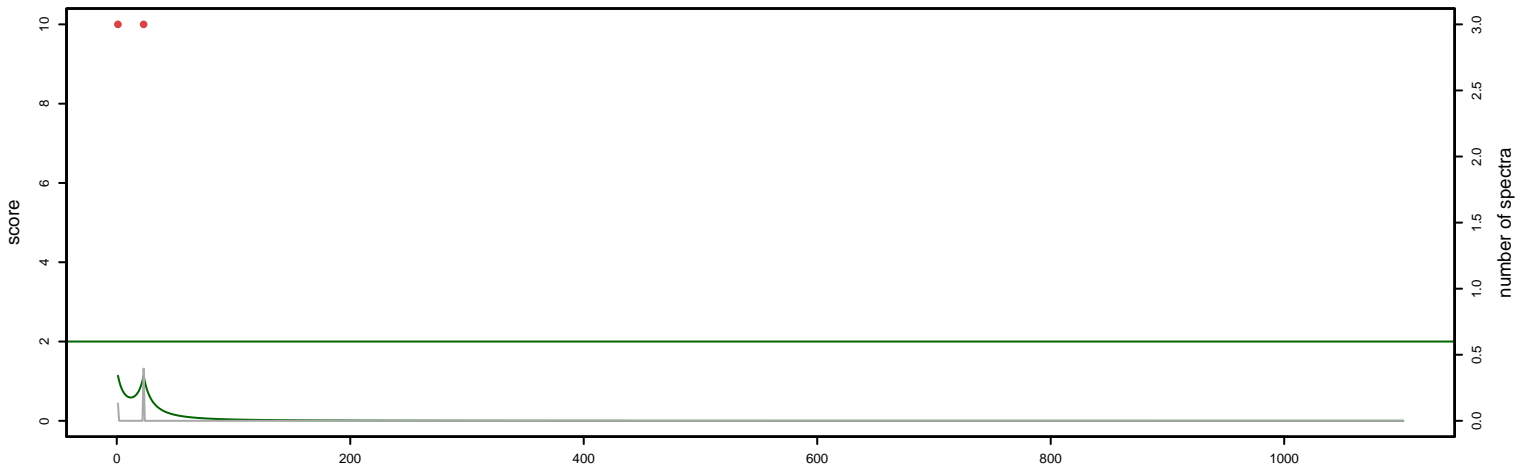

replica

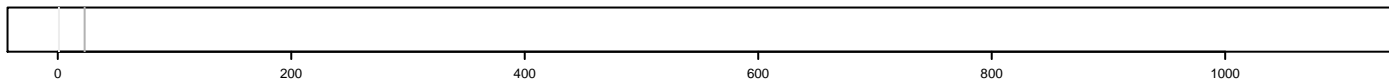

stability

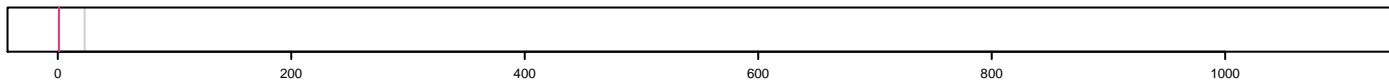



### Cullin-5 (Q93034)

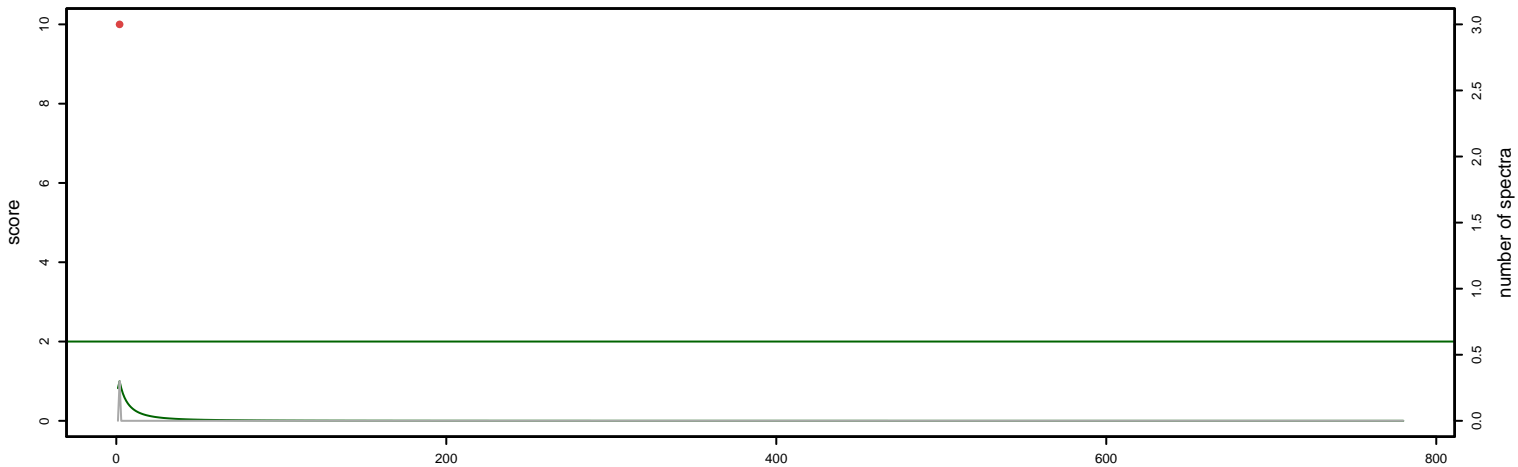

### replica

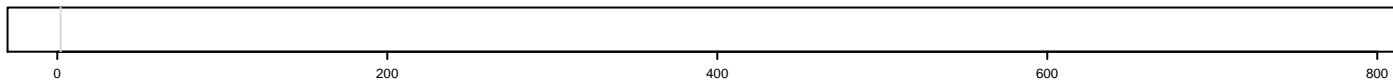

### stability

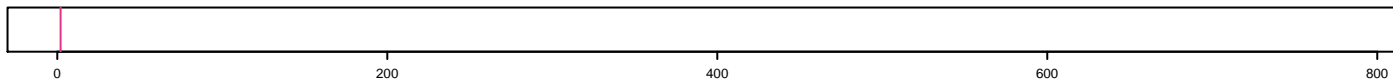

# Oxysterol-binding protein 2 (Q969R2)

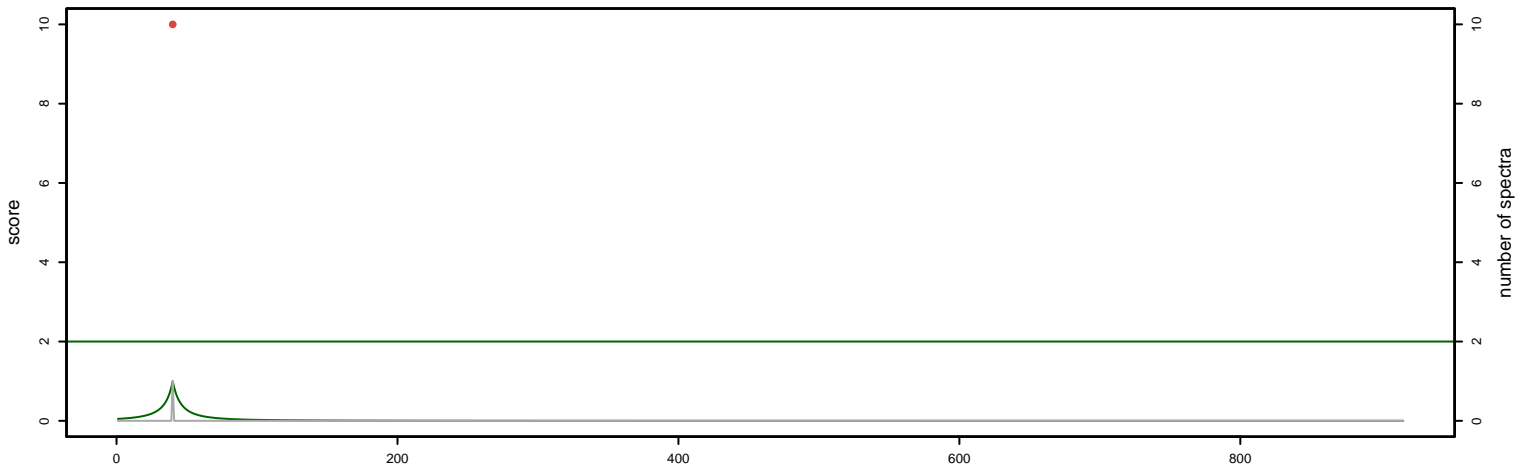

replica

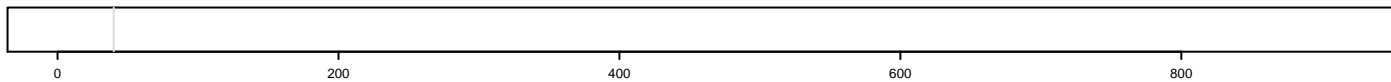

stability

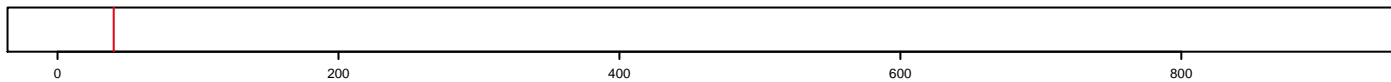

# WW domain-binding protein 2 (Q969T9)

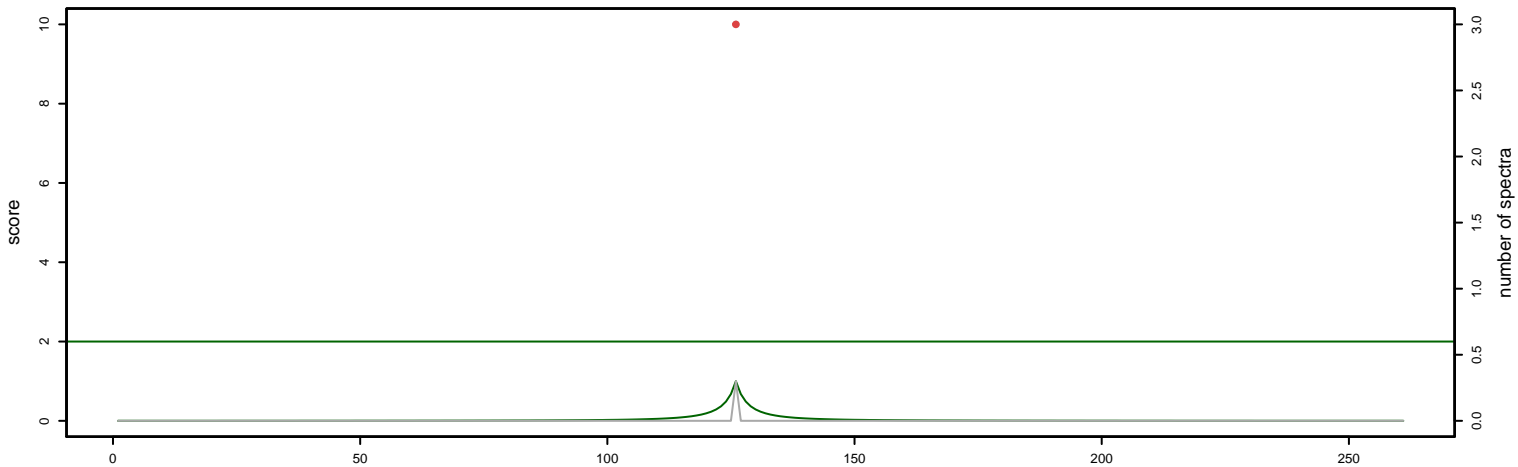

replica

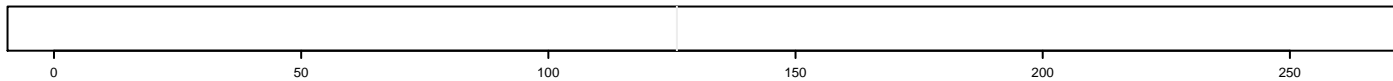

stability

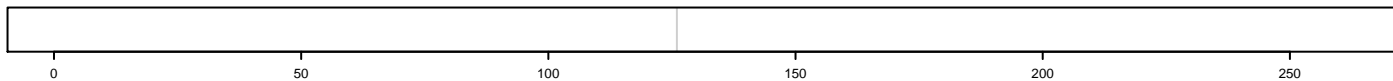

### Protein lifeguard 3 (Q969X1)

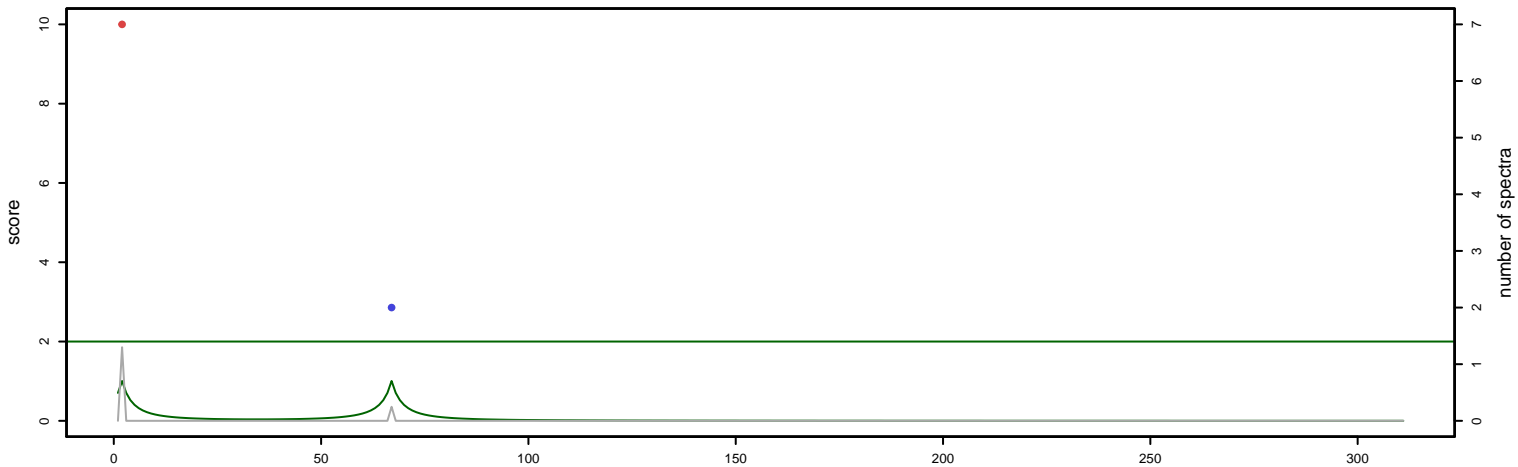

### replica

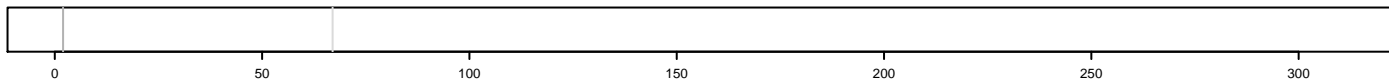

### stability

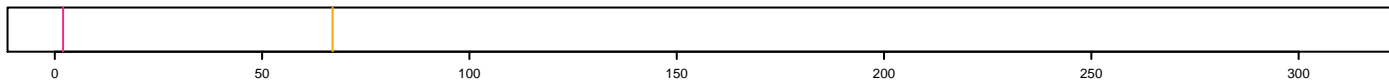

### Exocyst complex component 4 (Q96A65)

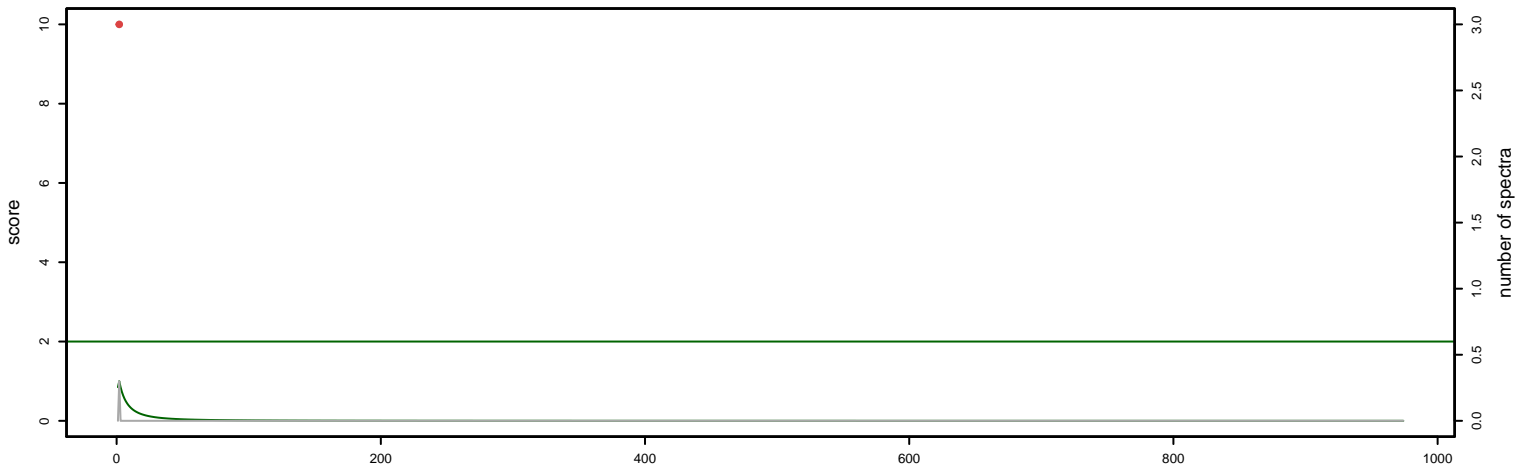

replica

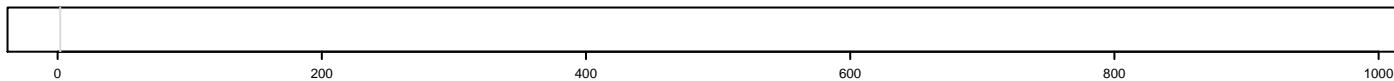

stability

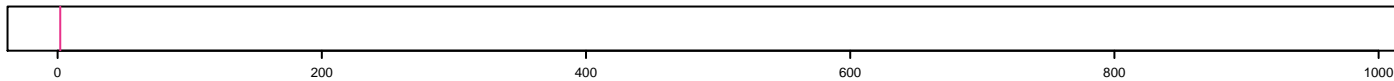

# Protein mago nashi homolog 2 (Q96A72)

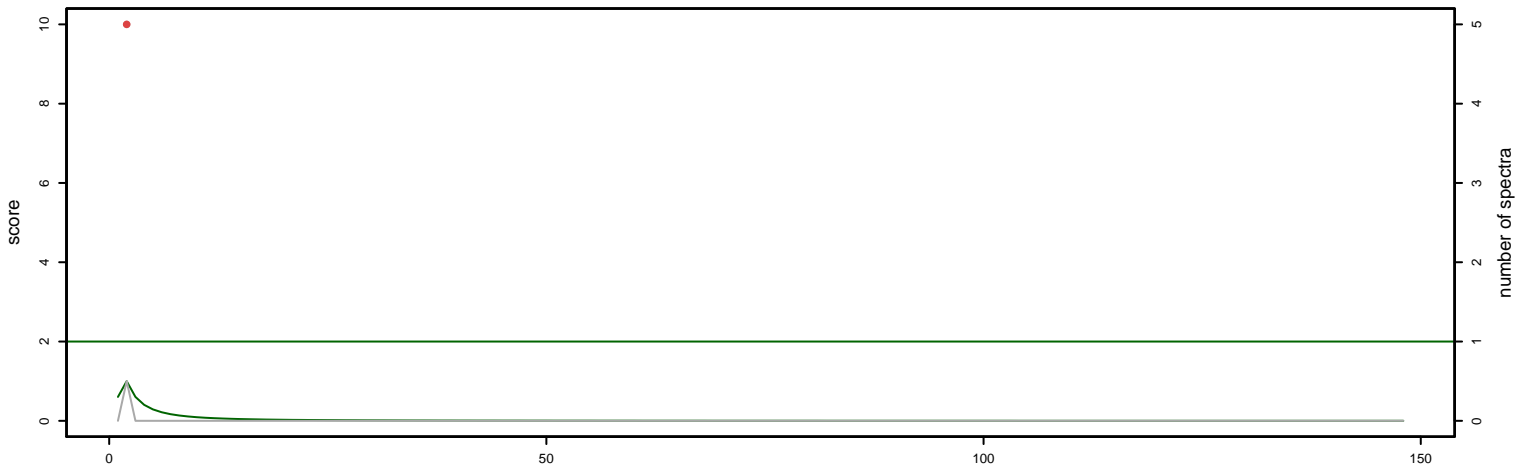

replica

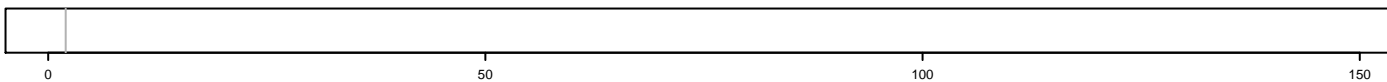

stability

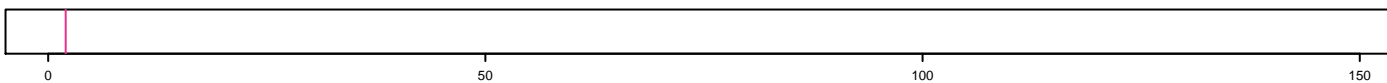

# Ribulose-phosphate 3-epimerase (Q96AT9)

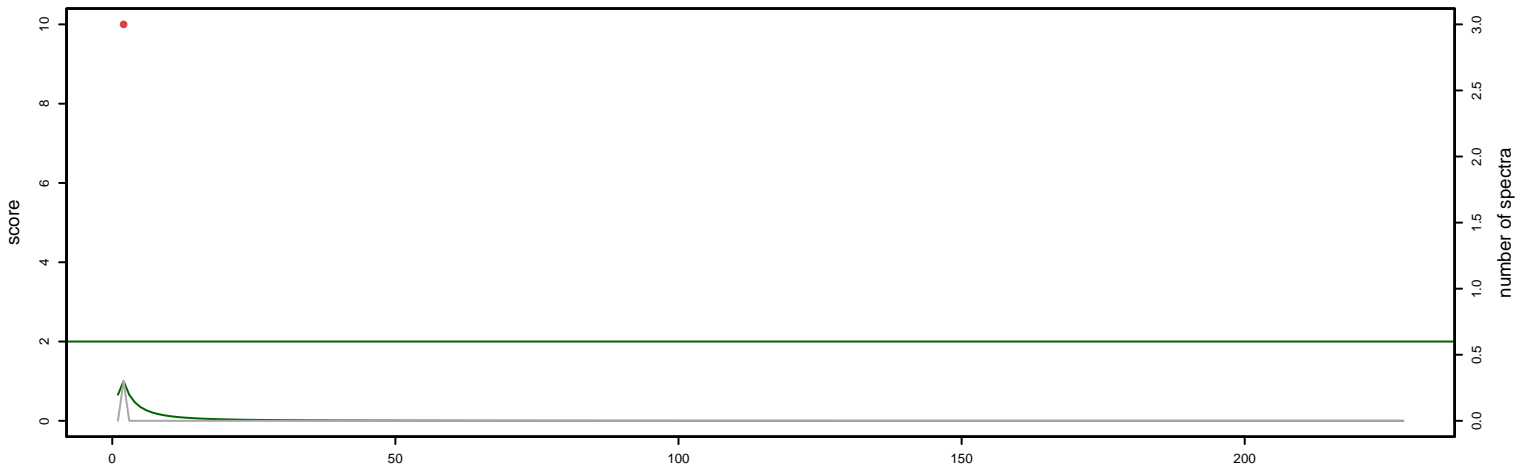

replica

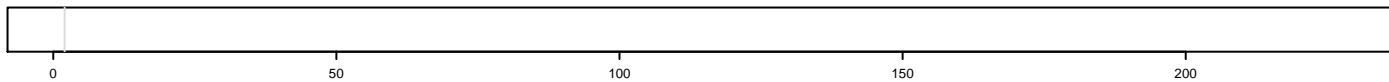

stability

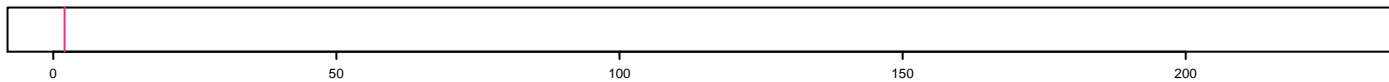

# Protein FAM105B (Q96BN8)

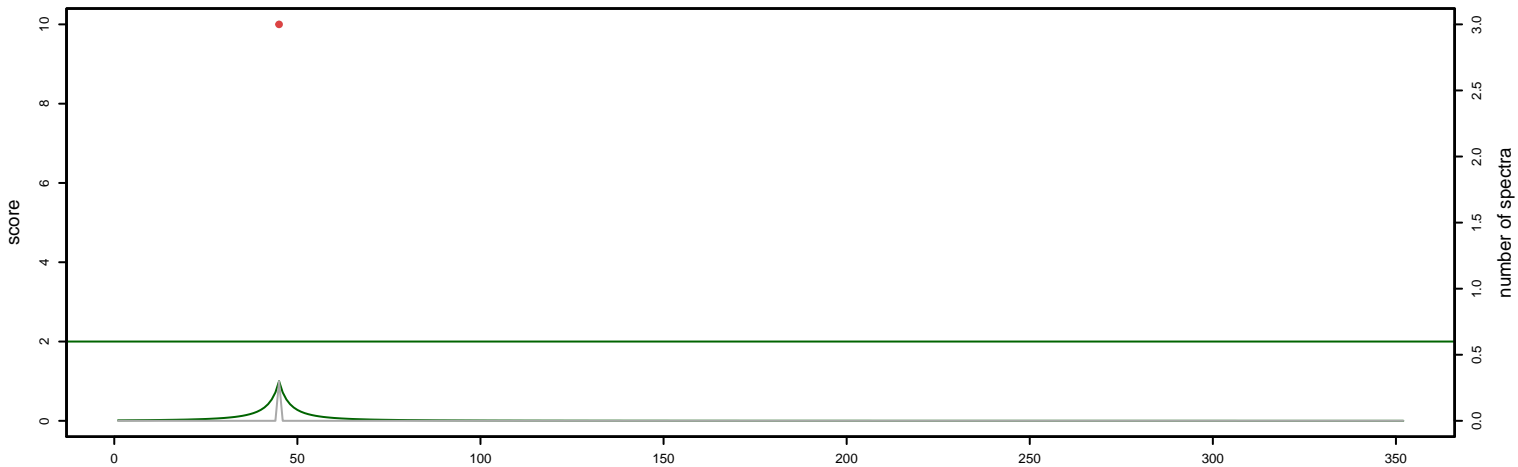

replica

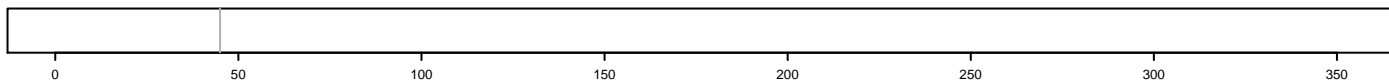

stability

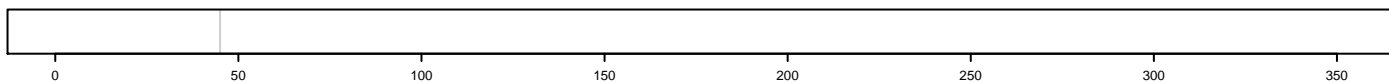



# EF-hand domain-containing protein D2 (Q96C19)

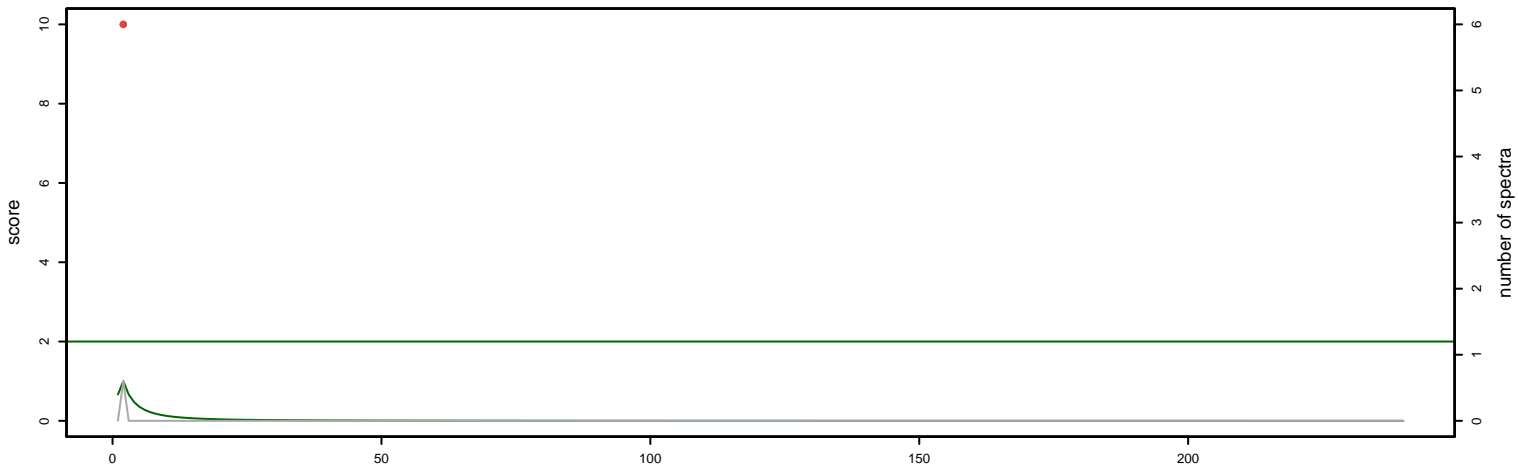

replica

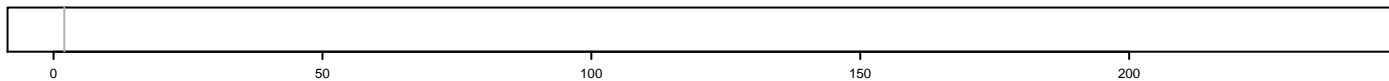

stability

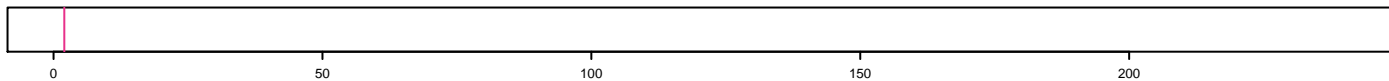

# m7GpppX diphosphatase (Q96C86)

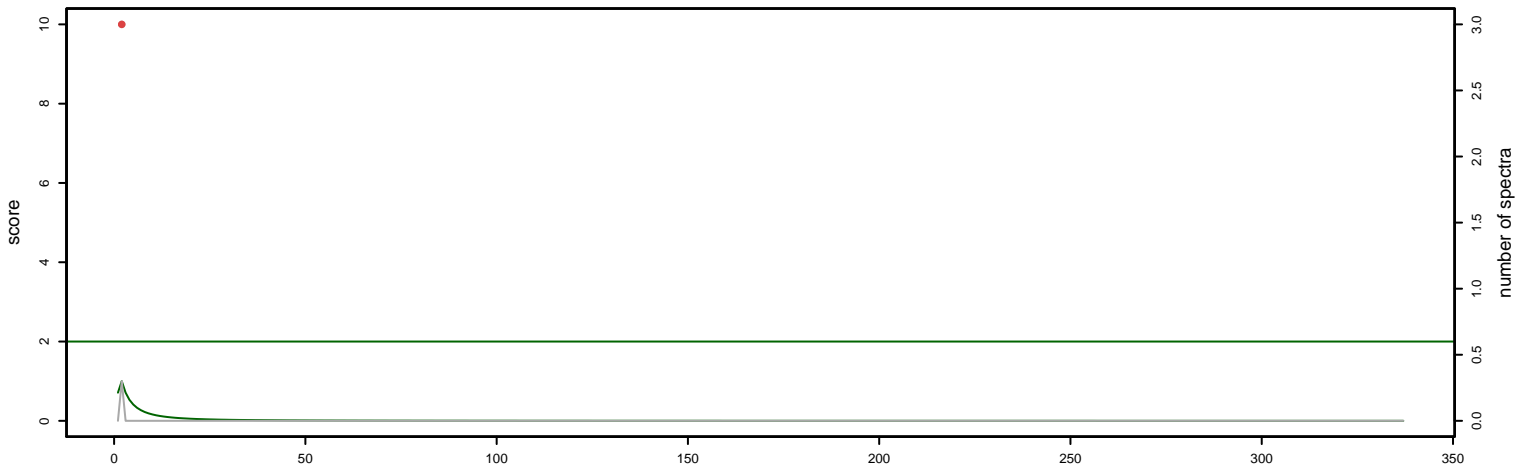

replica

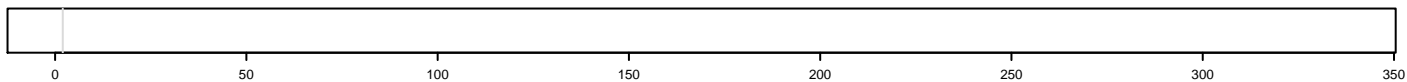

stability

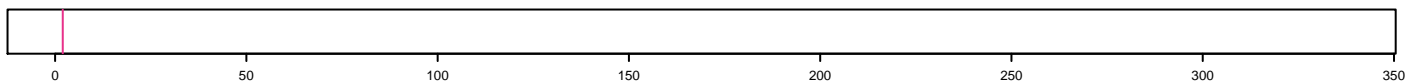

# Phosphopantothenoylcysteine decarboxylase (Q96CD2)

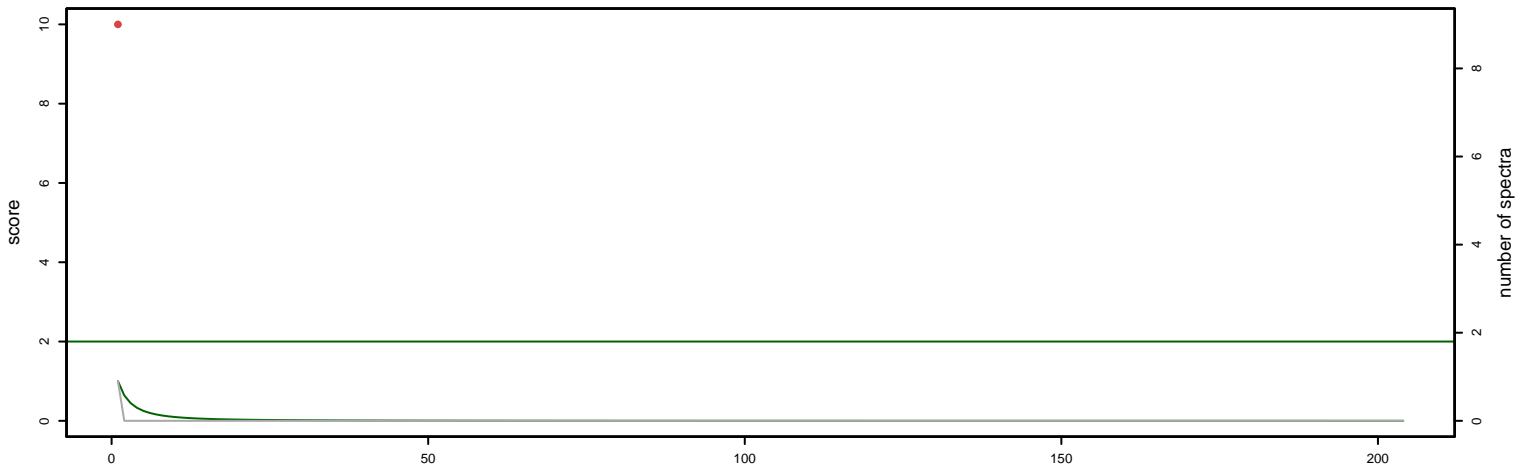

replica

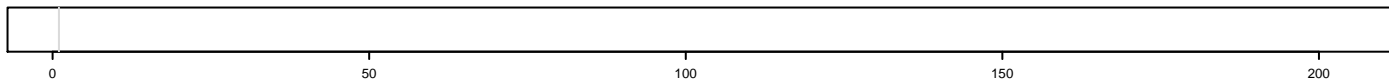

stability

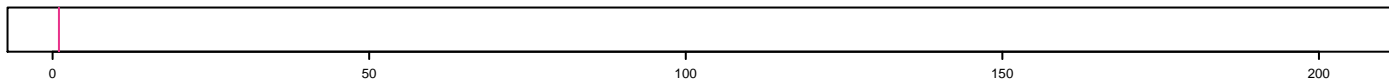

# Carboxymethylenebutenolidase homolog (Q96DG6)

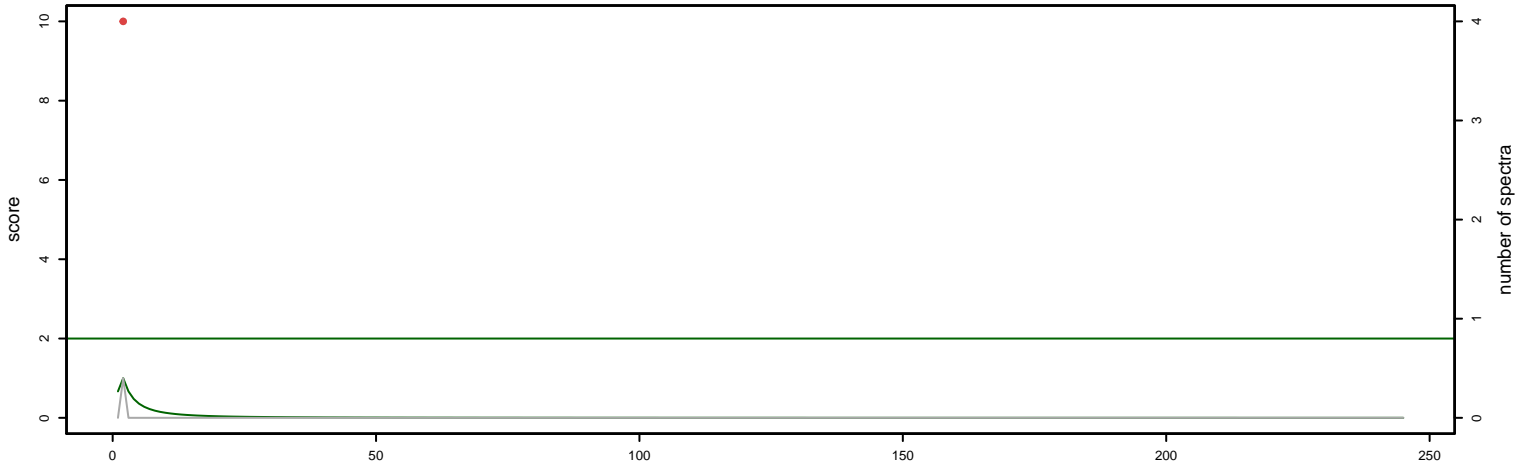

replica

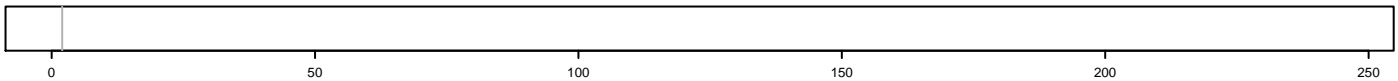

stability

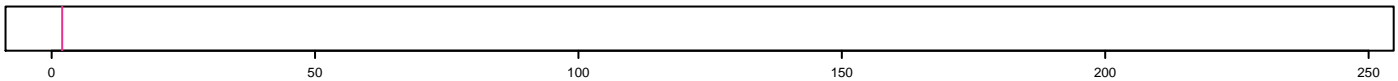

# Protein YIPF6 (Q96EC8)

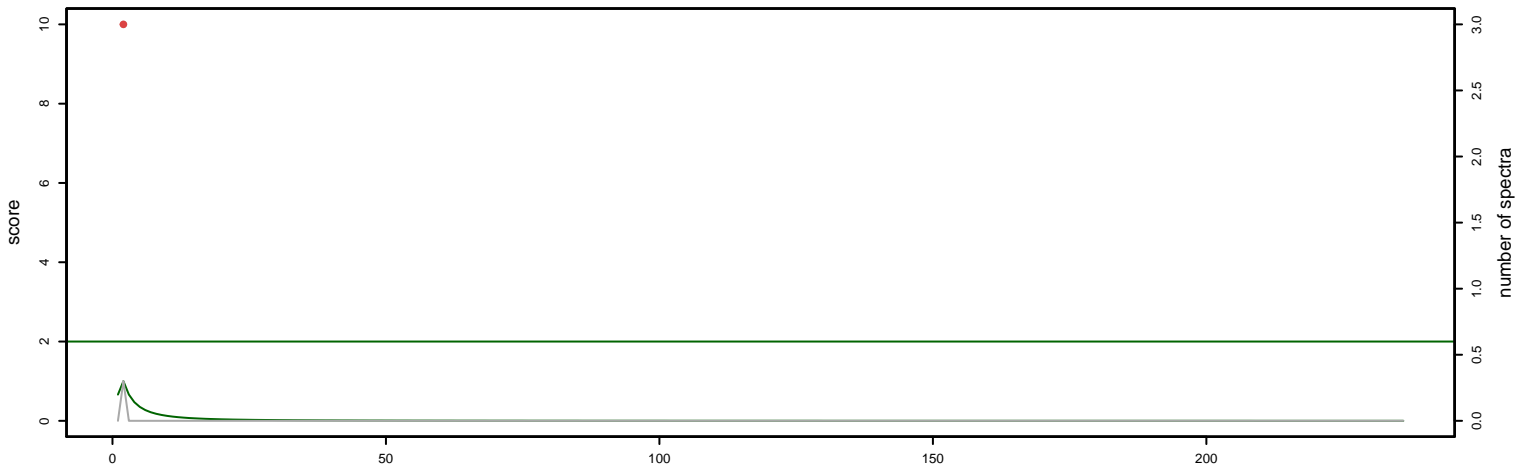

replica

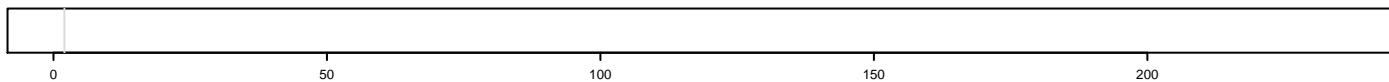

stability

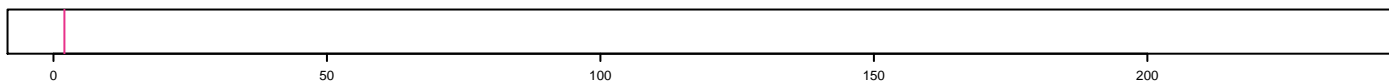

# CB1 cannabinoid receptor-interacting protein 1 (Q96F85)

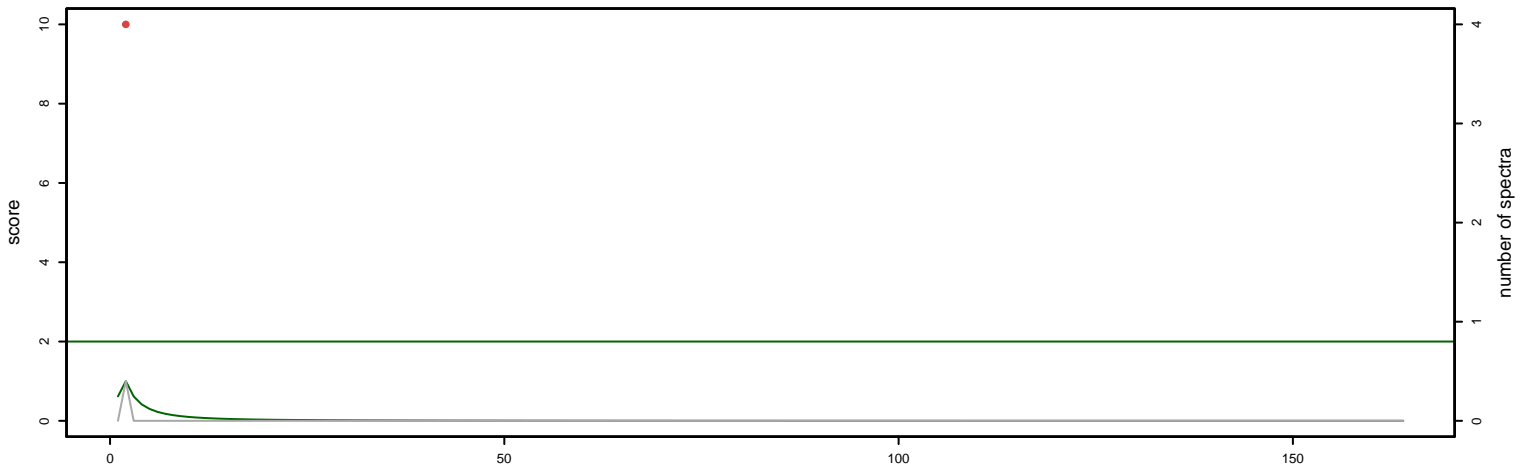

replica

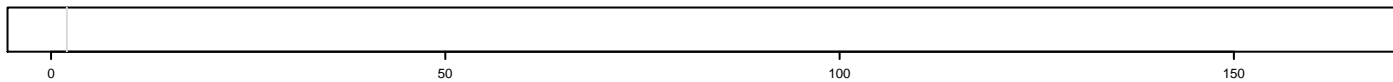

stability

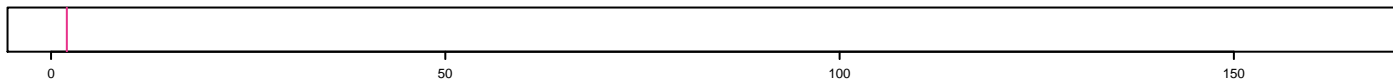

# Ubiquitin thioesterase OTUB1 (Q96FW1)

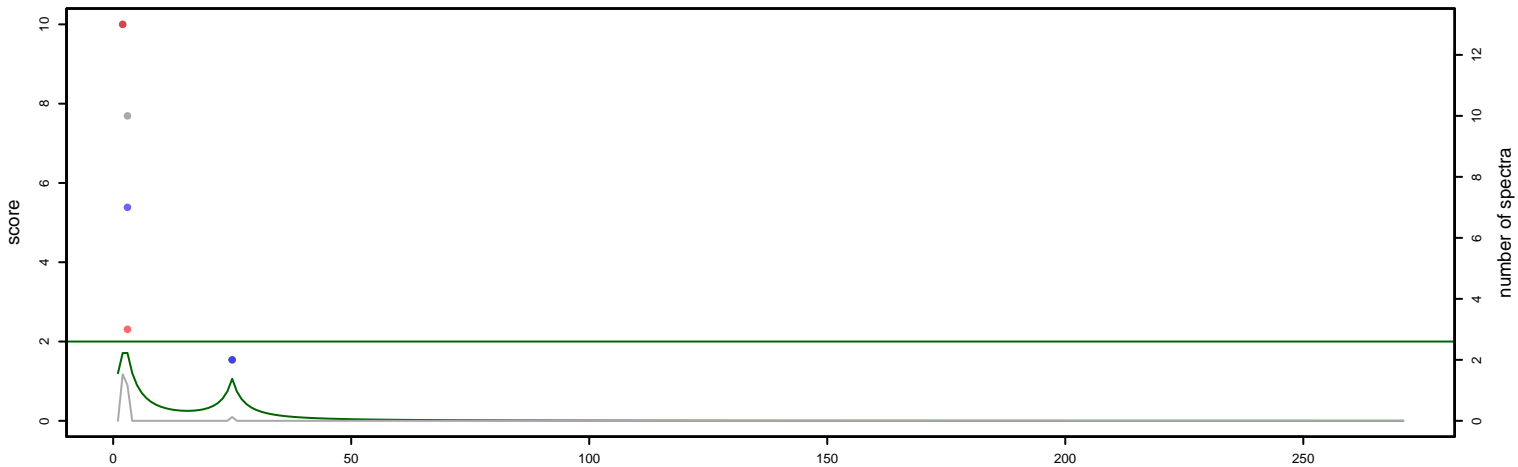

replica

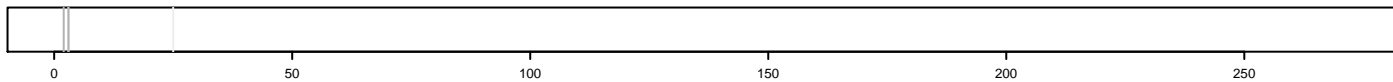

stability

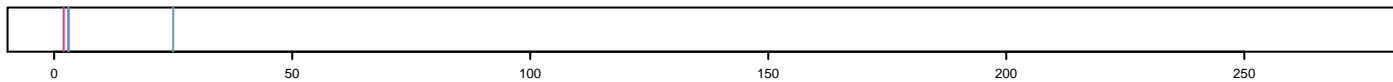

# Phosphoglucomutase-2 (Q96G03)

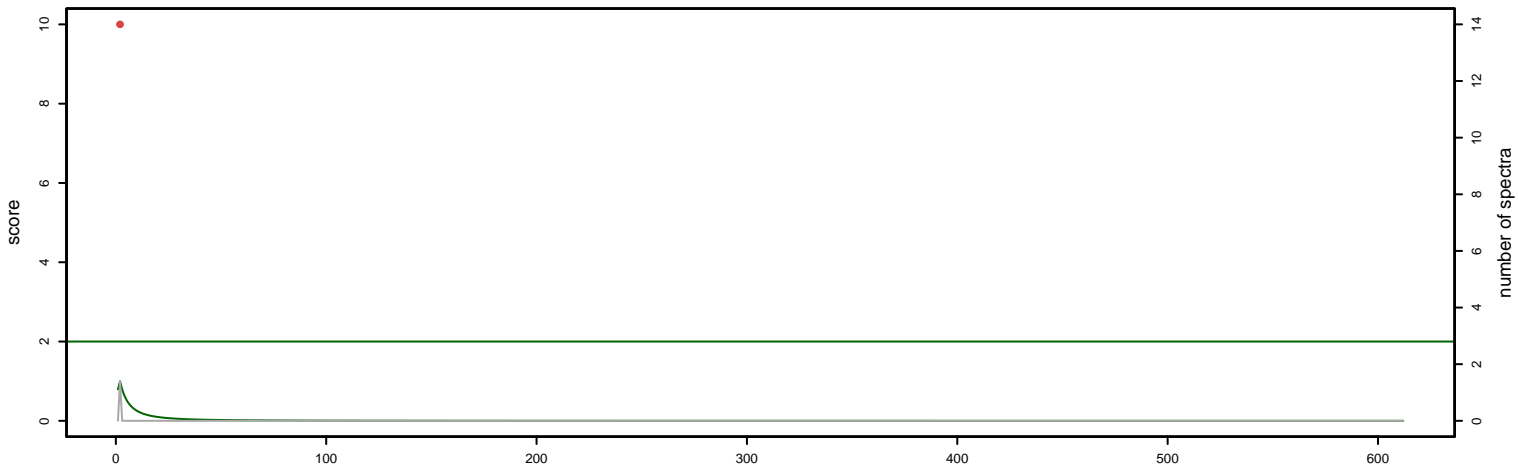

replica

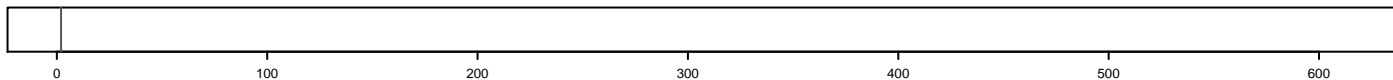

stability

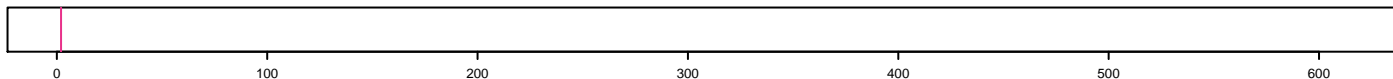



### Cytosolic non-specific dipeptidase (Q96KP4)

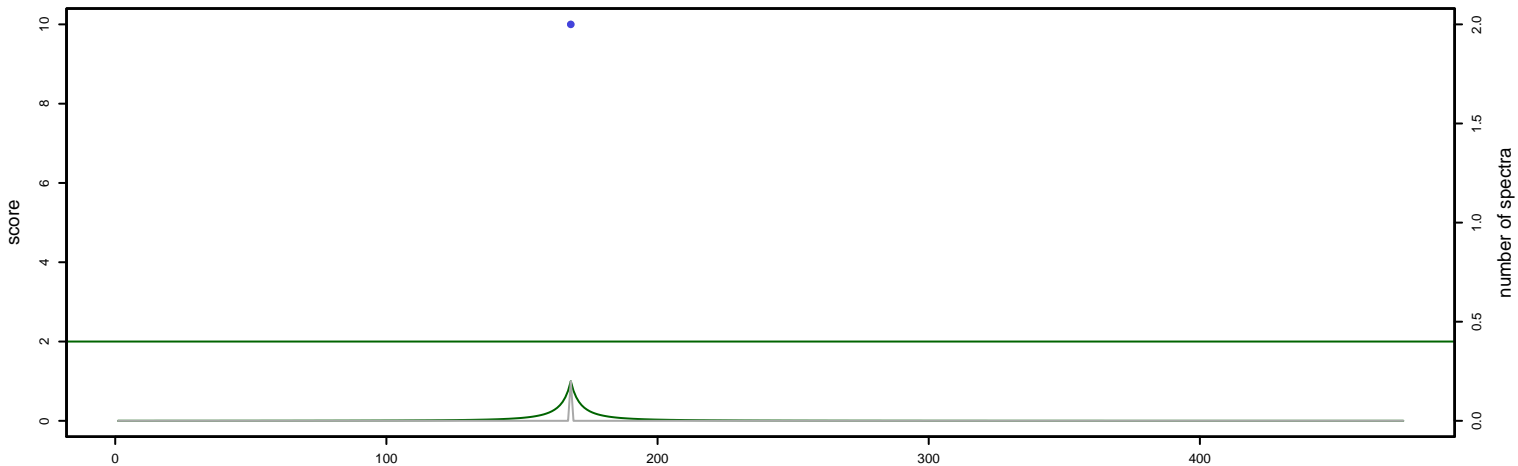

replica

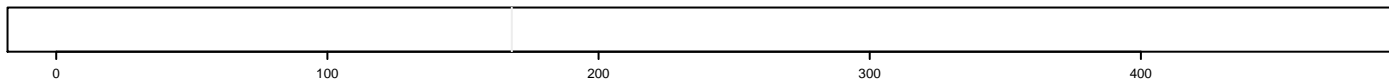

stability

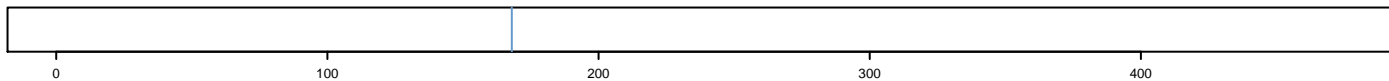

### Sorting nexin-22 (Q96L94)

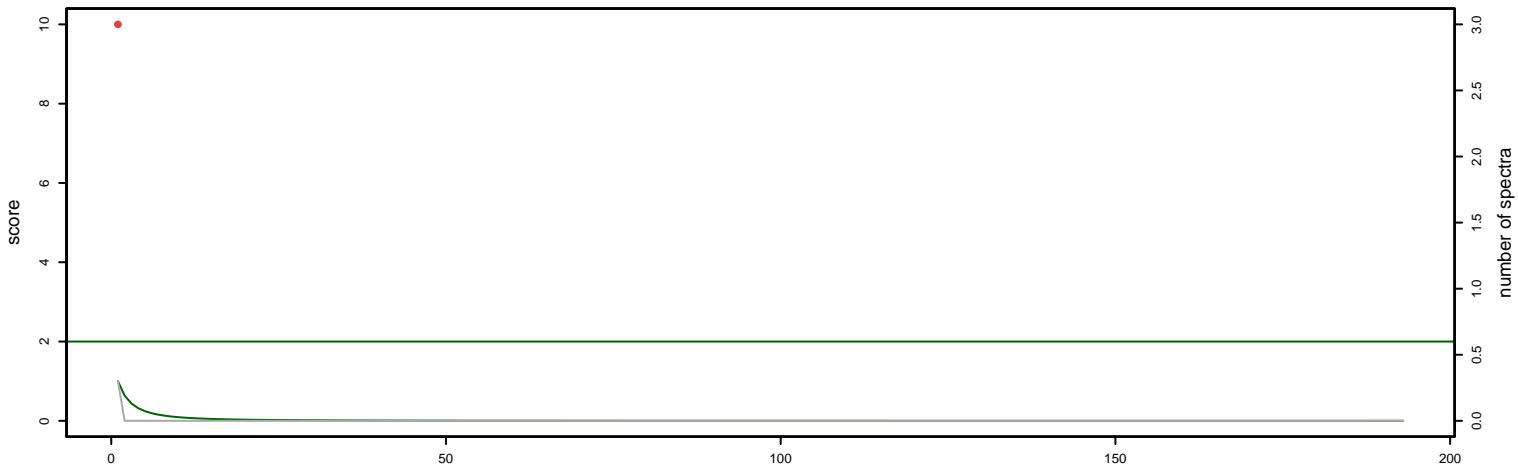

replica

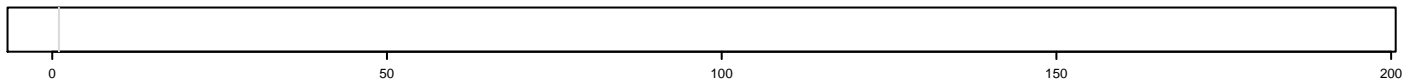

stability

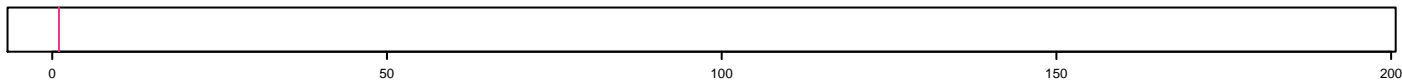

### Adenylate kinase 7 (Q96M32)

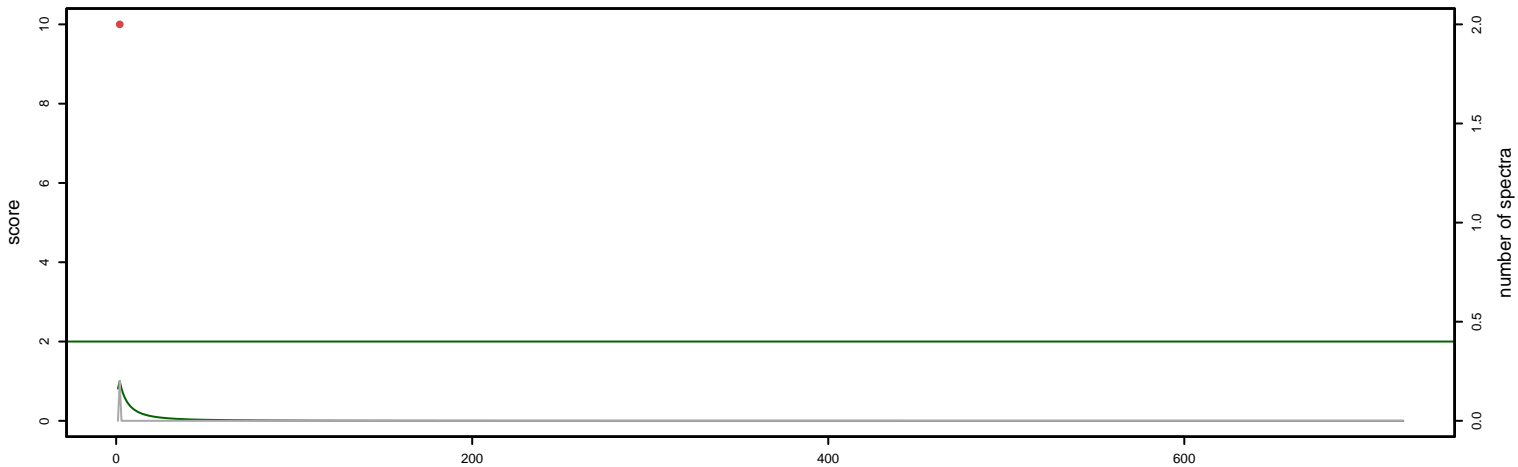

replica

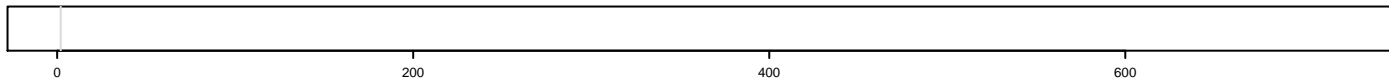

stability

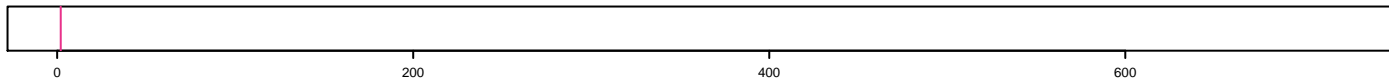

### E3 ubiquitin-protein ligase NEDD4-like (Q96PU5)

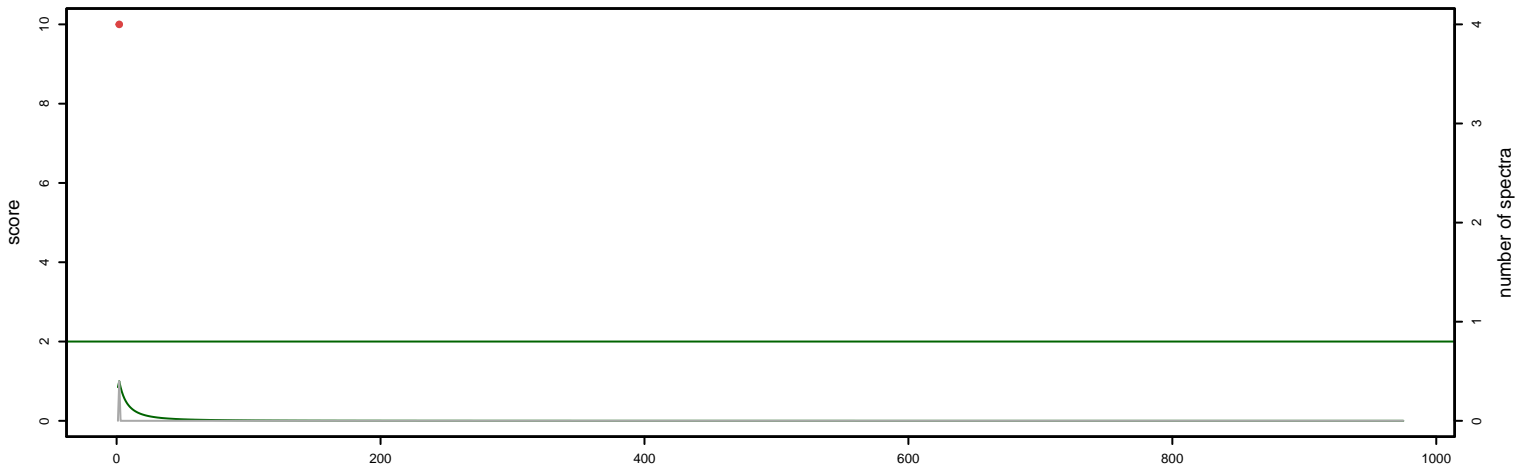

replica

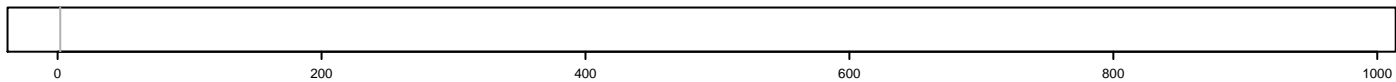

stability

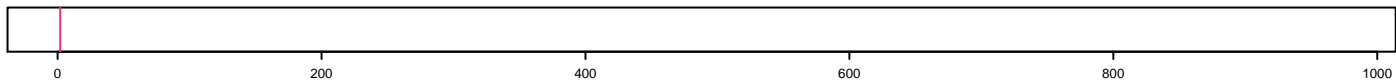

# NudC domain-containing protein 1 (Q96RS6)

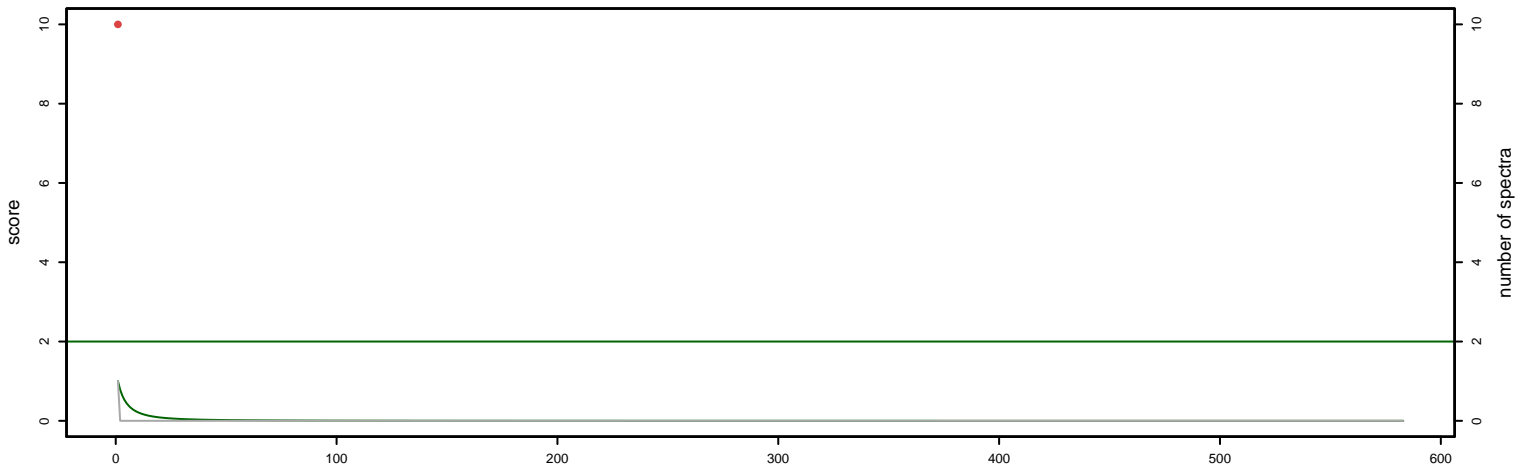

replica

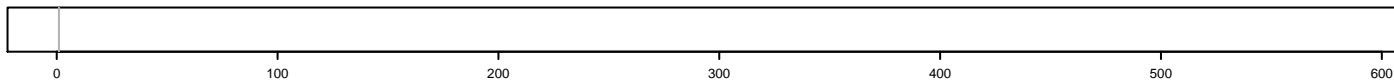

stability

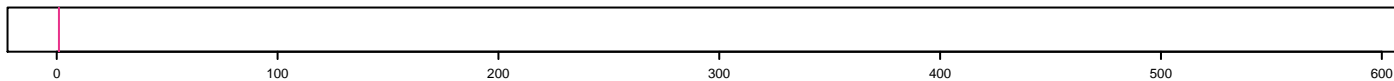

# Ubiquitin-like protein 7 (Q96S82)

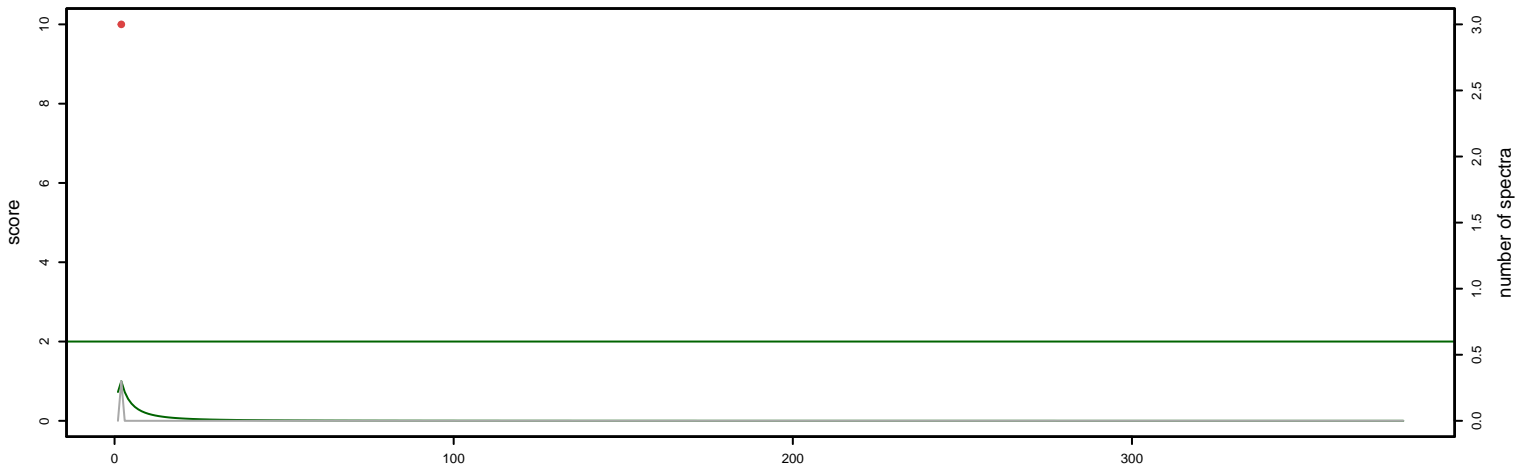

replica

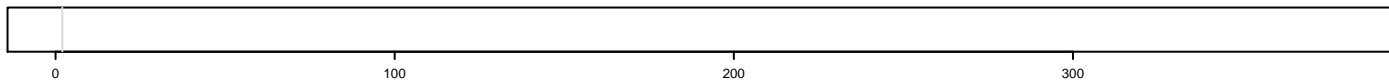

stability

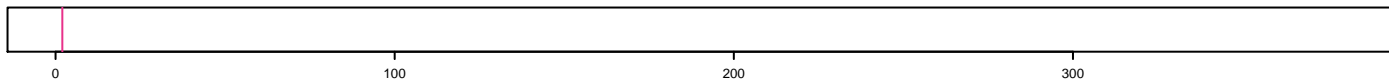

### Proteasome subunit beta type-7 (Q99436)

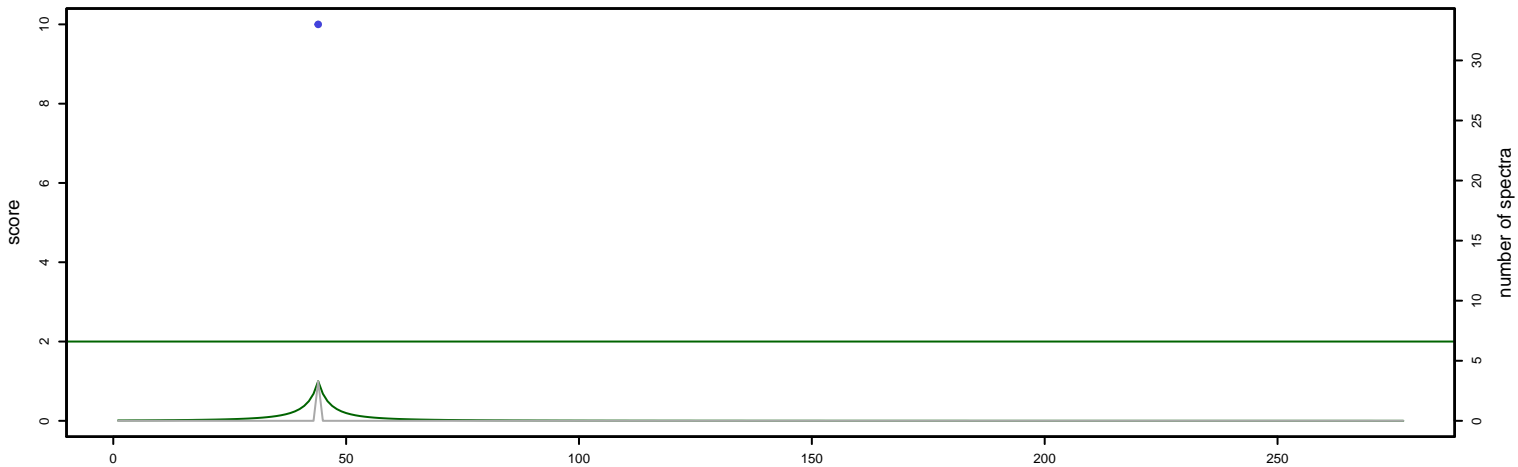

replica

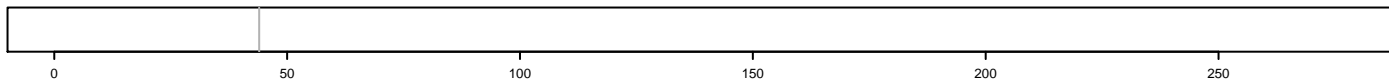

stability

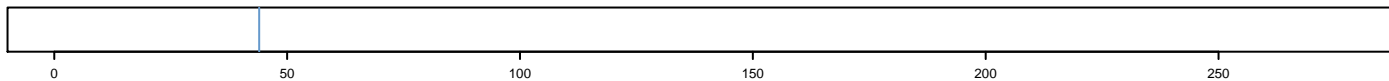

### 26S proteasome non-ATPase regulatory subunit 1 (Q99460)

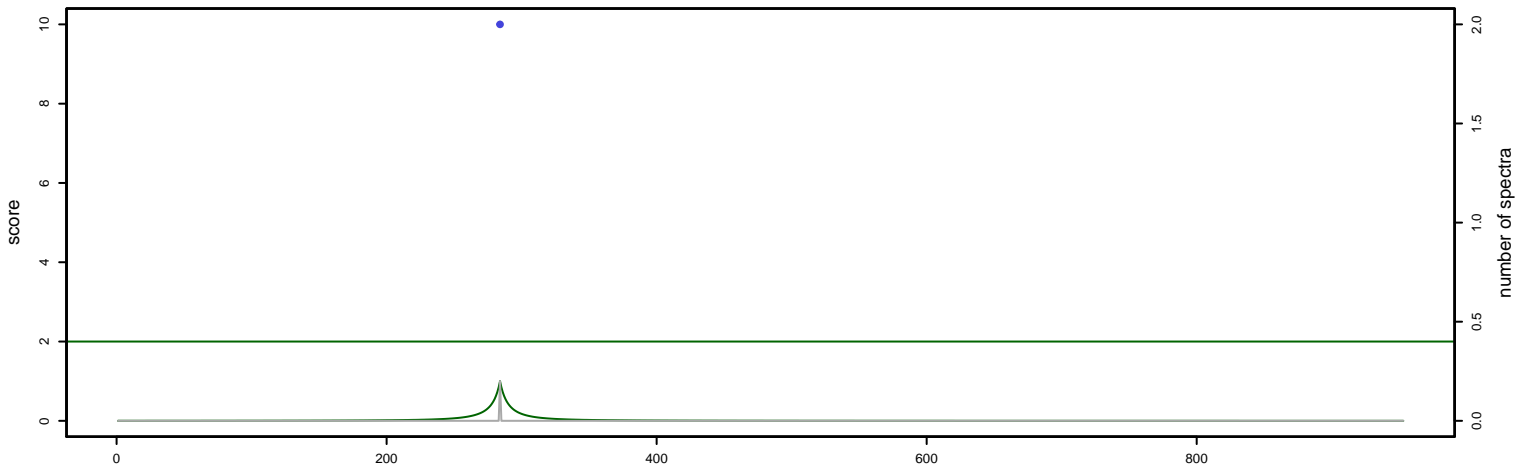

replica

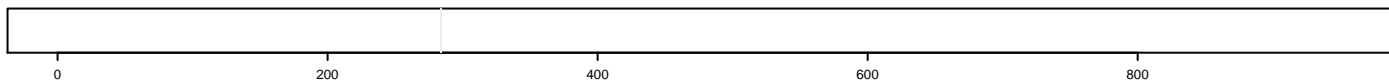

stability

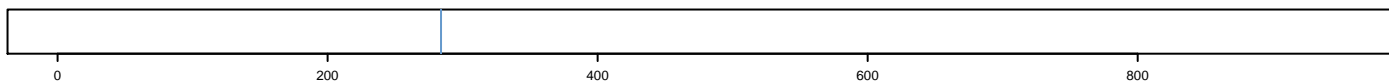



Protein DJ-1 (Q99497)

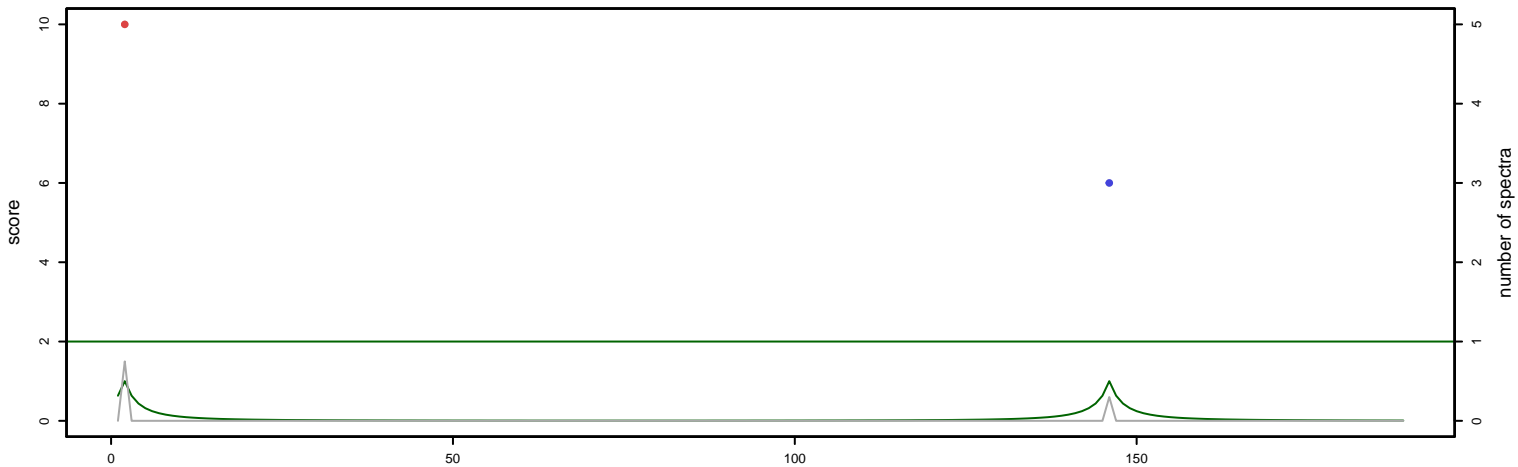

replica

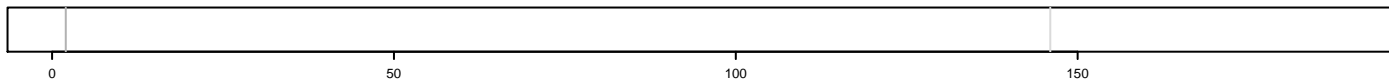

stability

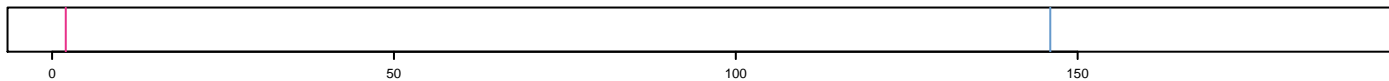

### Translin-associated protein X (Q99598)

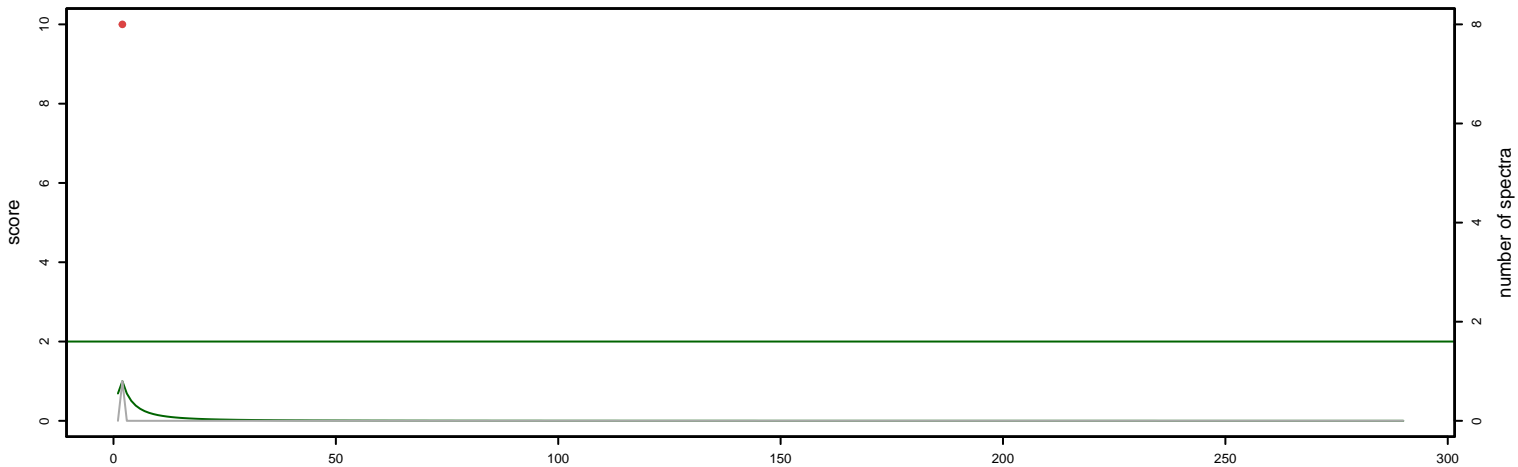

replica

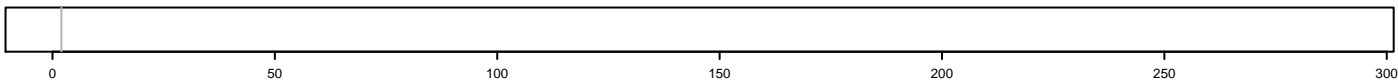

stability

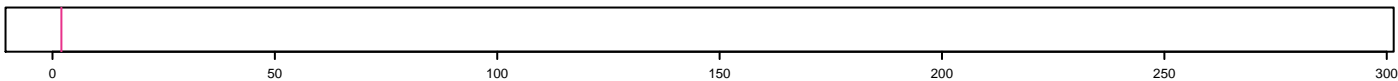

### Nucleosome assembly protein 1-like 4 (Q99733)

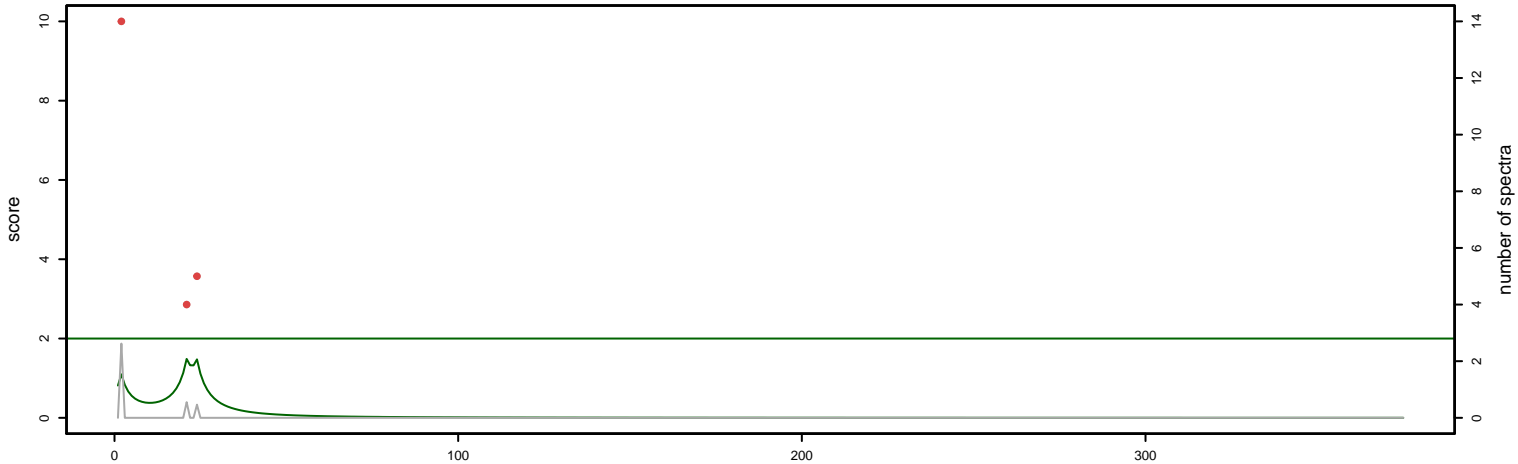

replica

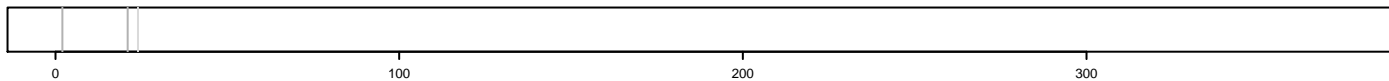

stability

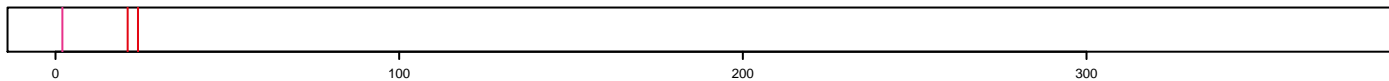

# Tumor susceptibility gene 101 protein (Q99816)

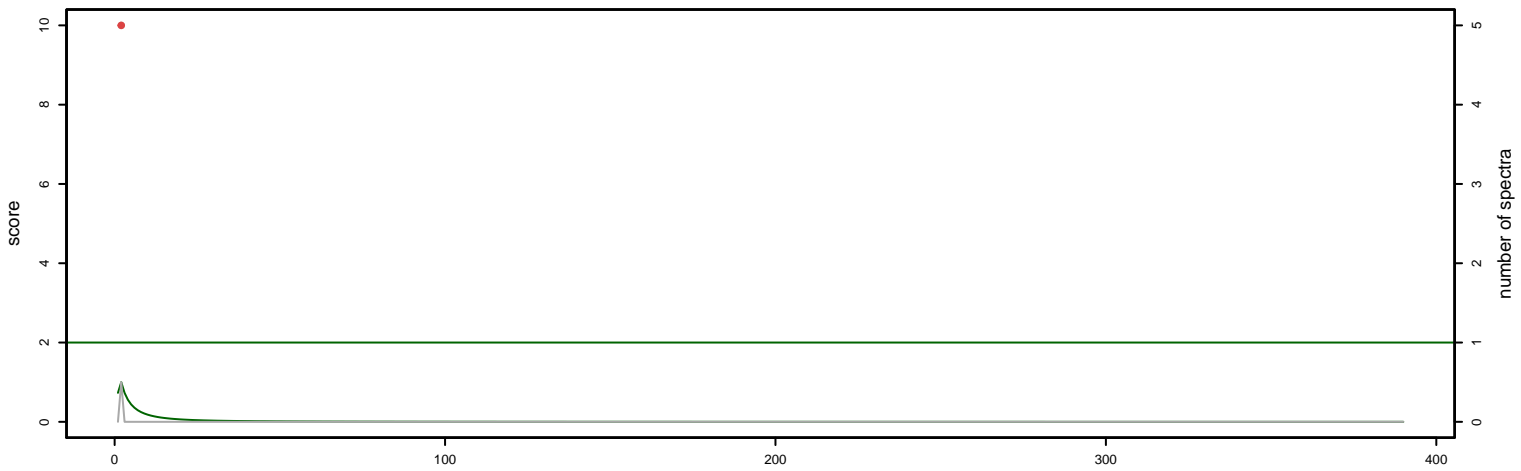

replica

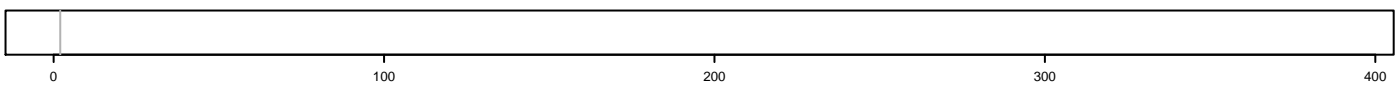

stability

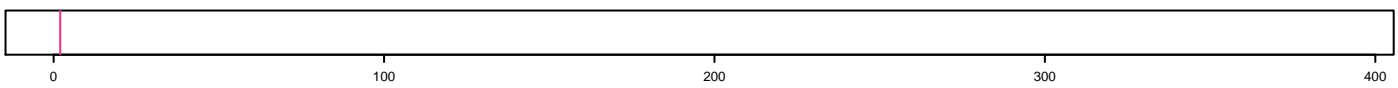

### T-complex protein 1 subunit eta (Q99832)

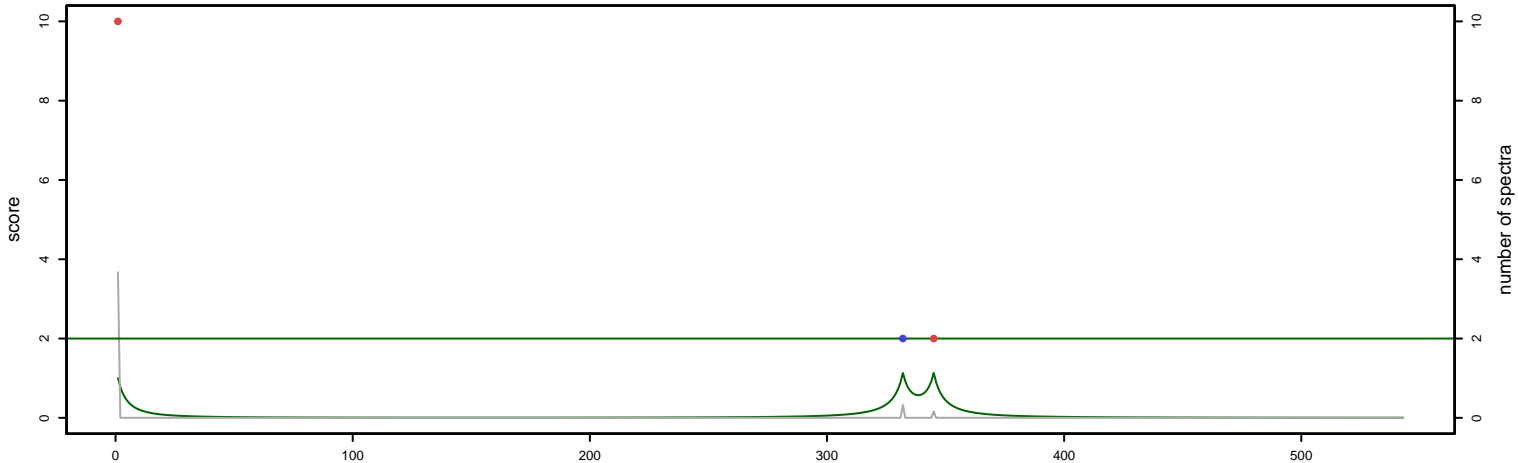

replica

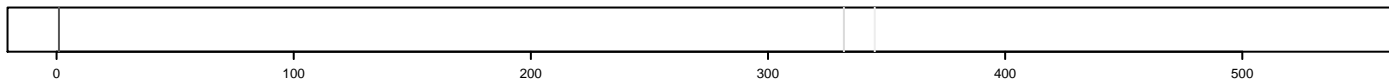

stability

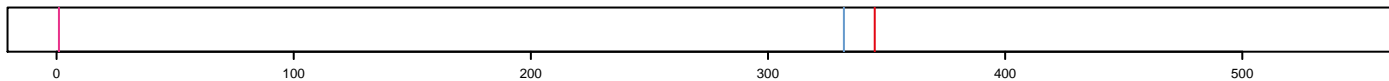

# Calcineurin-like phosphoesterase domain-containing protein 1 (Q9BRF8)

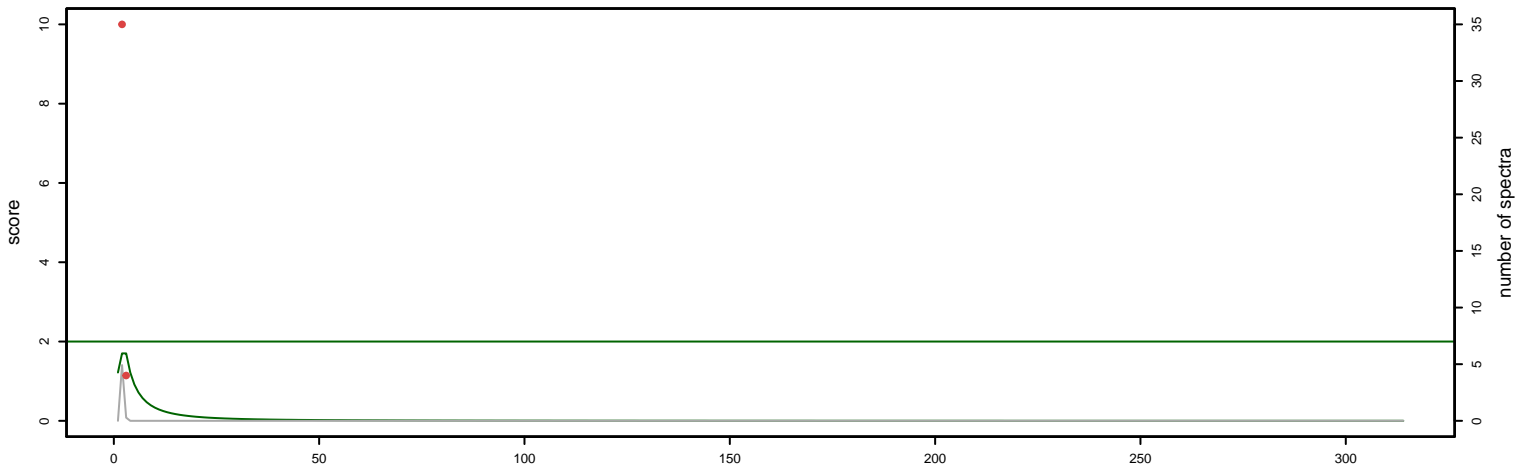

replica

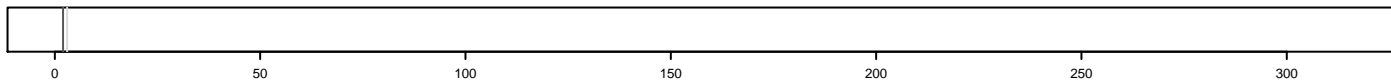

stability

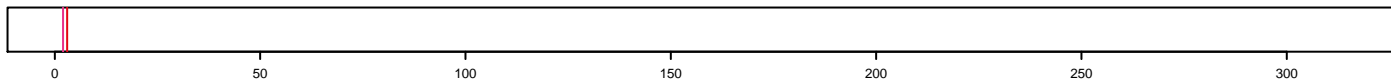

# Migration and invasion enhancer 1 (Q9BRT3)

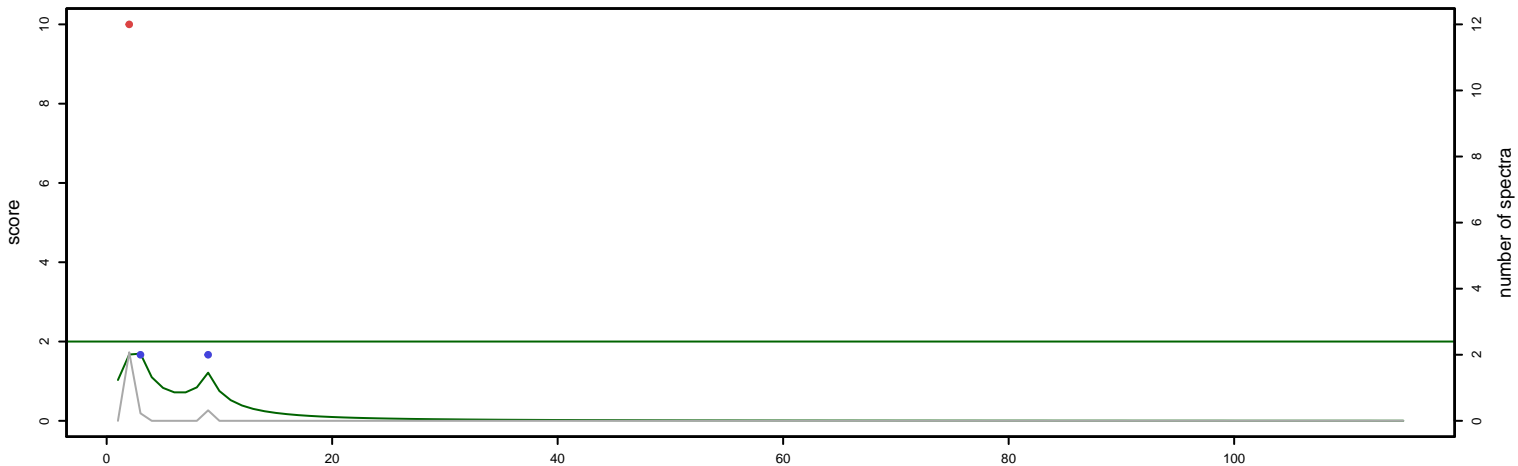

replica

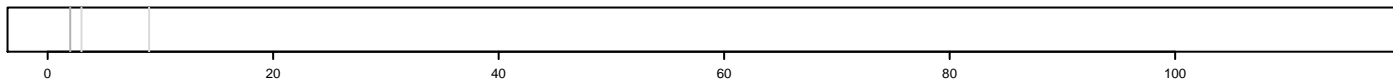

stability

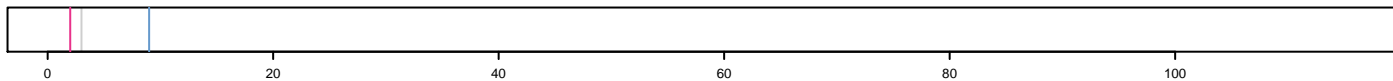

# Latexin (Q9BS40)

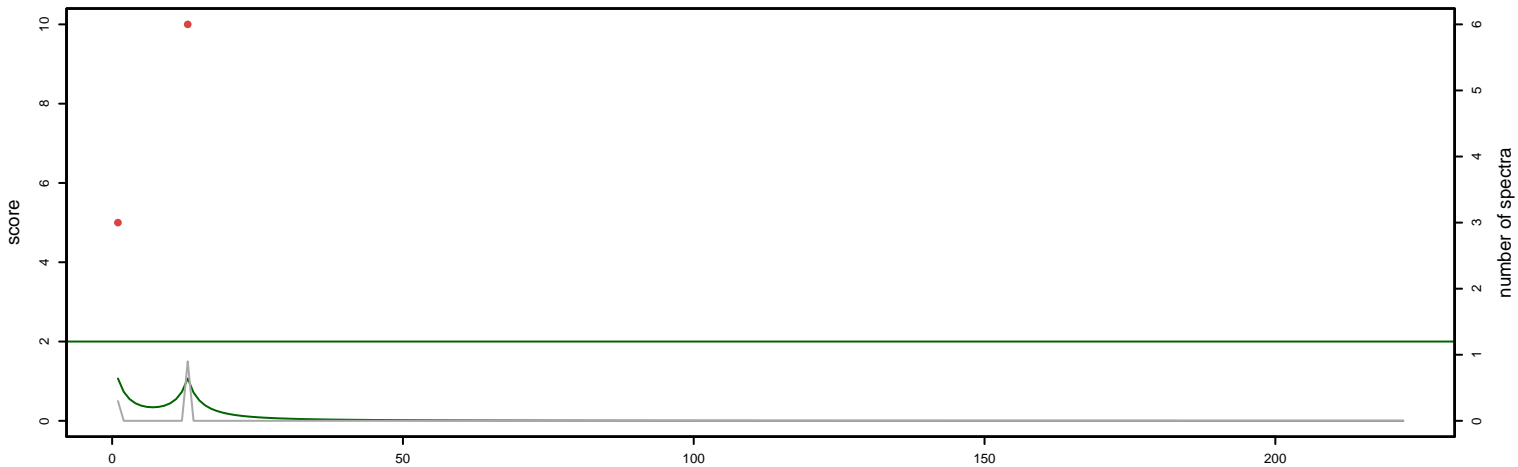

## replica

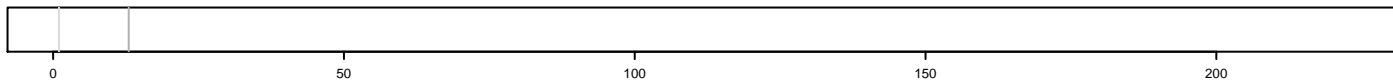

## stability

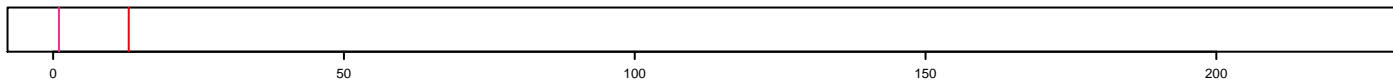



# Ubiquitin-associated domain-containing protein 1 (Q9BSL1)

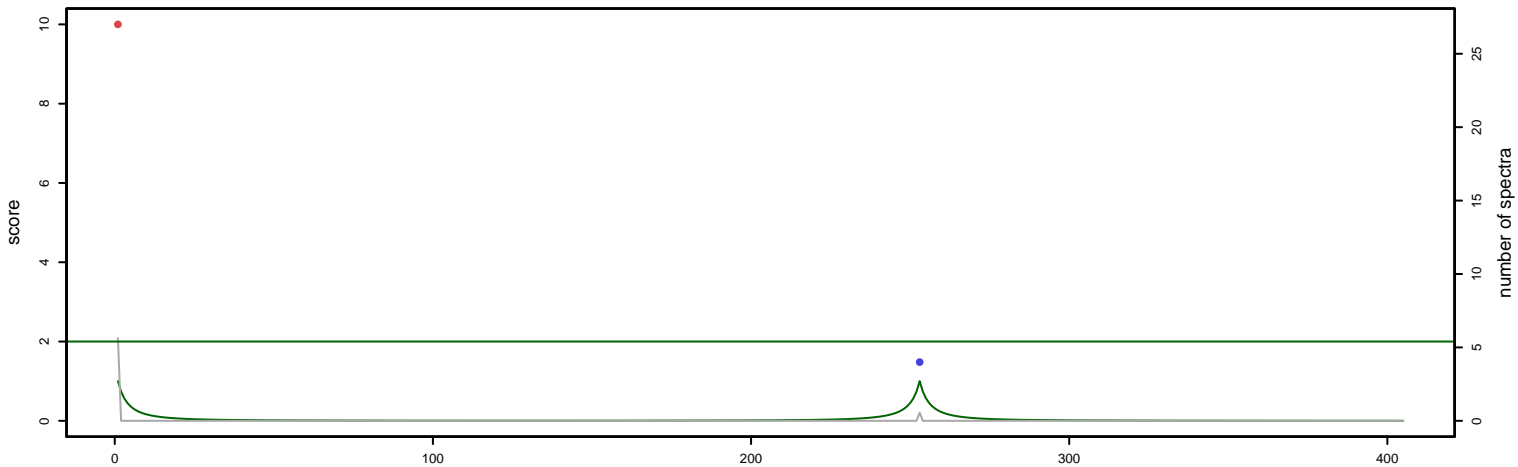

replica

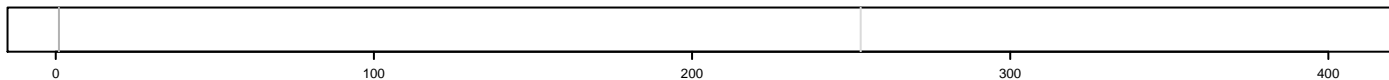

stability

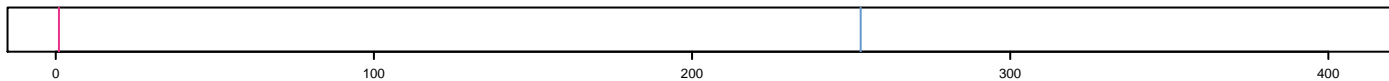

# UPF0183 protein C16orf70 (Q9BSU1)

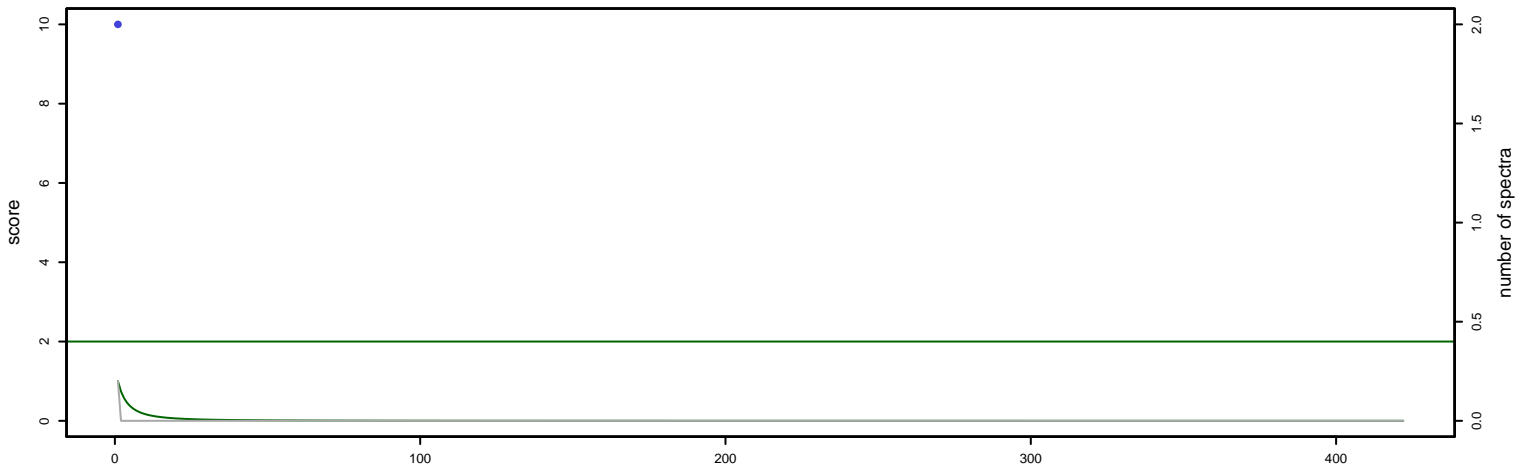

replica

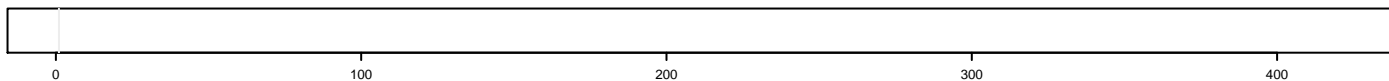

stability

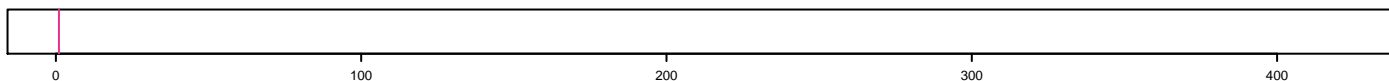

### Dynactin subunit 5 (Q9BTE1)

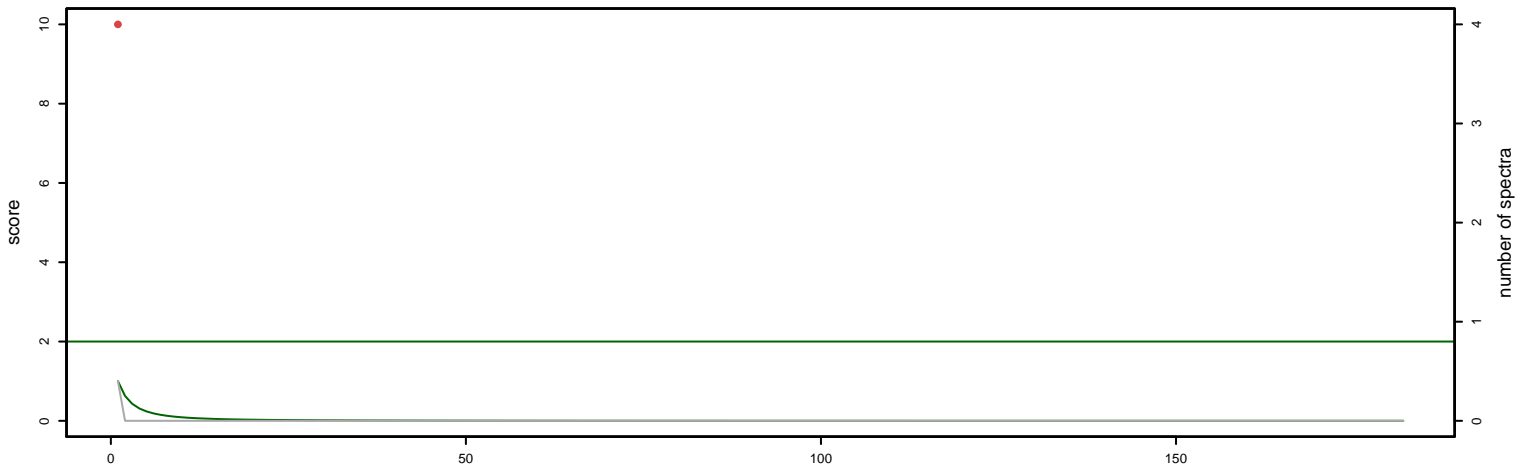

replica

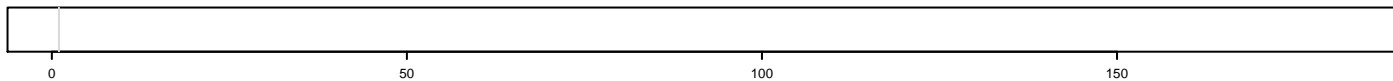

stability

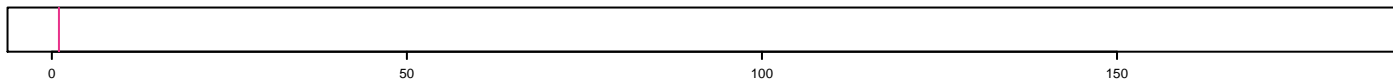

### Thiamine-triphosphatase (Q9BU02)

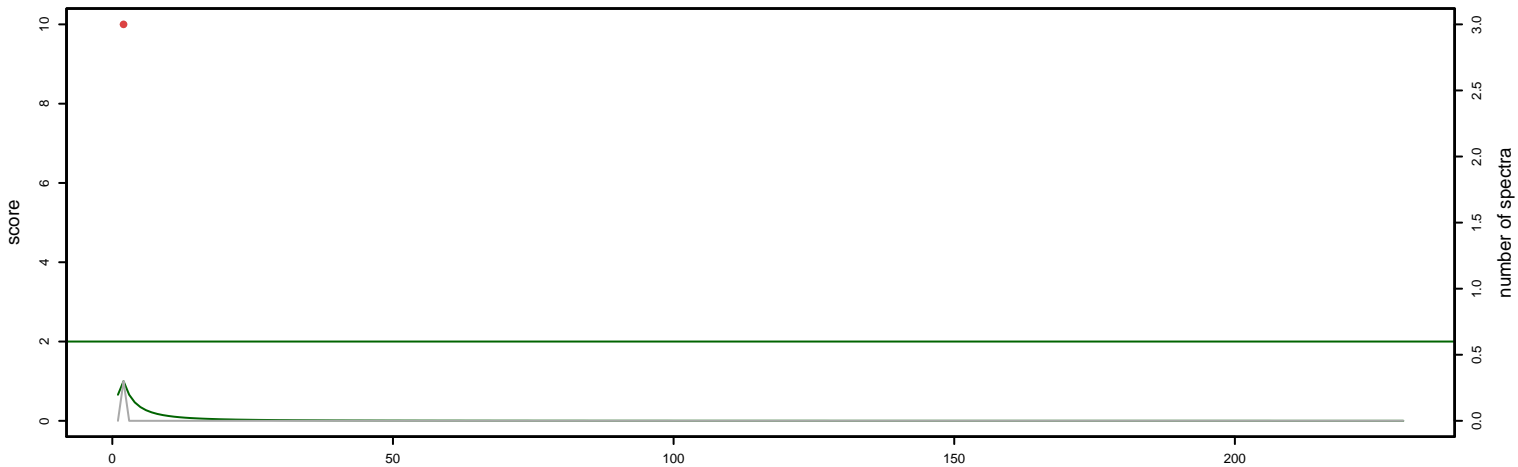

replica

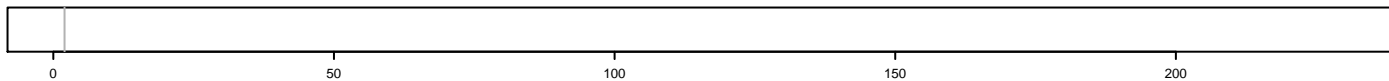

stability

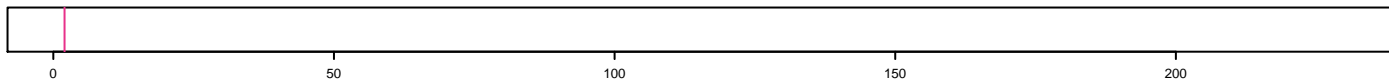

# Uncharacterized protein C9orf142 (Q9BUH6)

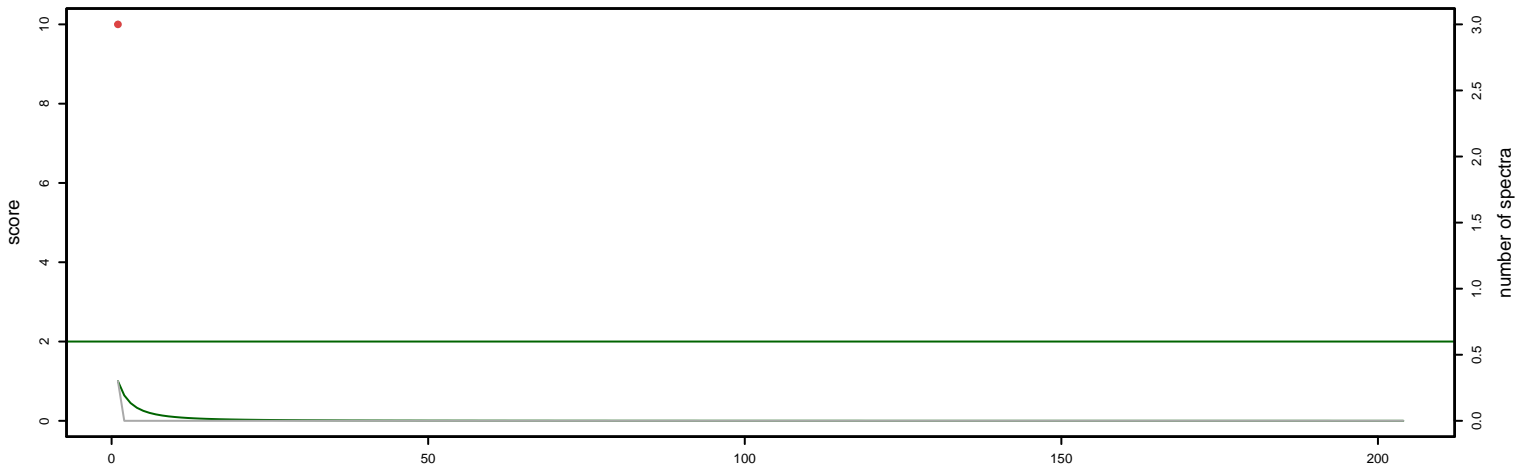

replica



stability



# Oxidoreductase HTATIP2 (Q9BUP3)

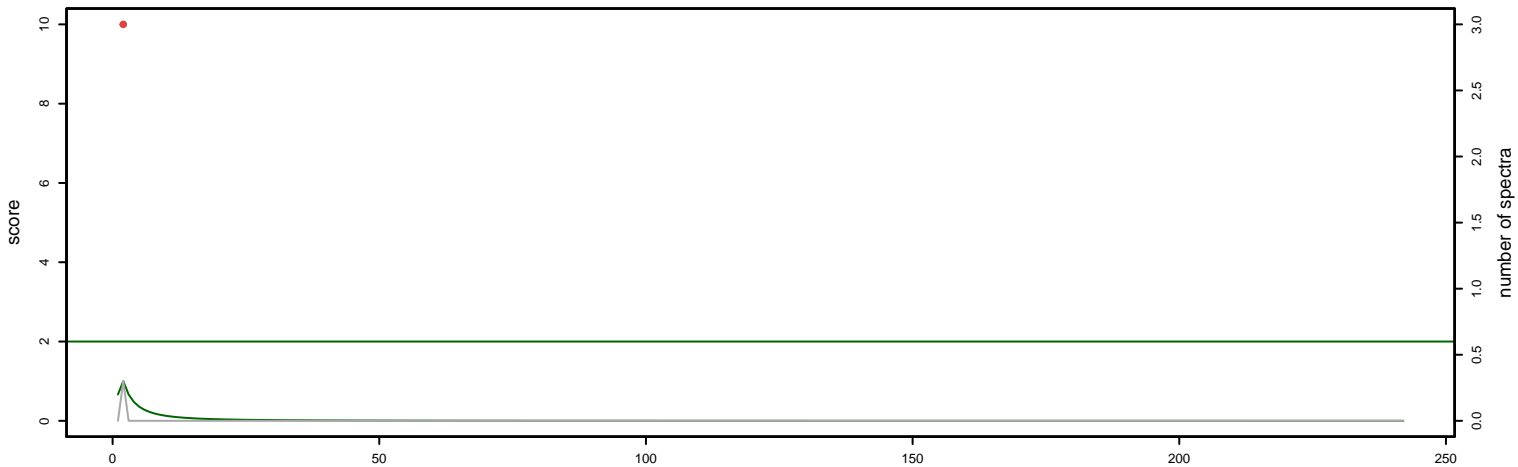

replica

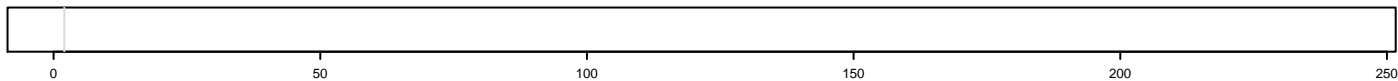

stability

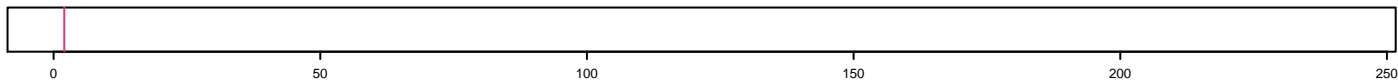

### Vesicle-associated membrane protein 8 (Q9BV40)

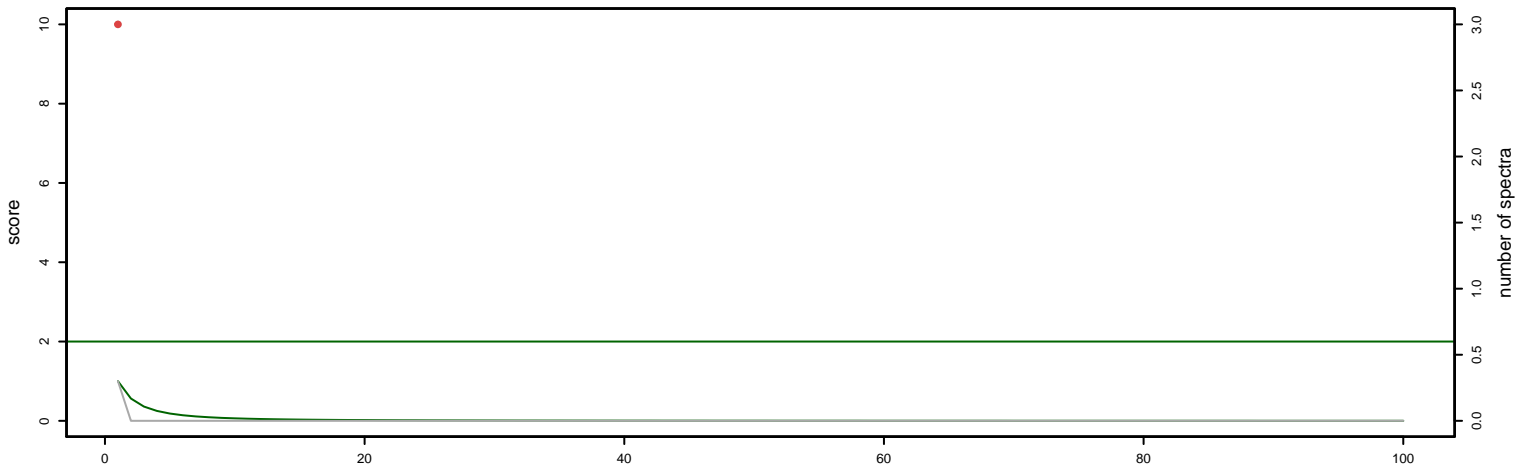

replica

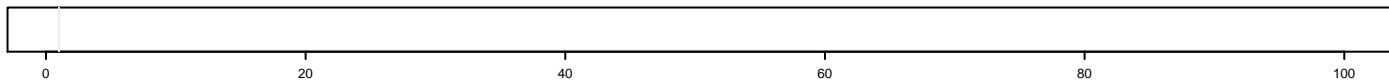

stability

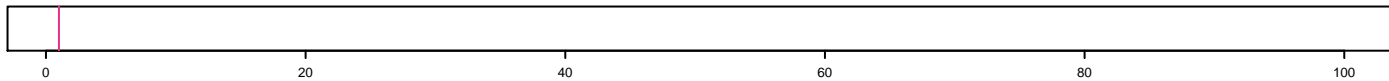

# RING finger protein 126 (Q9BV68)

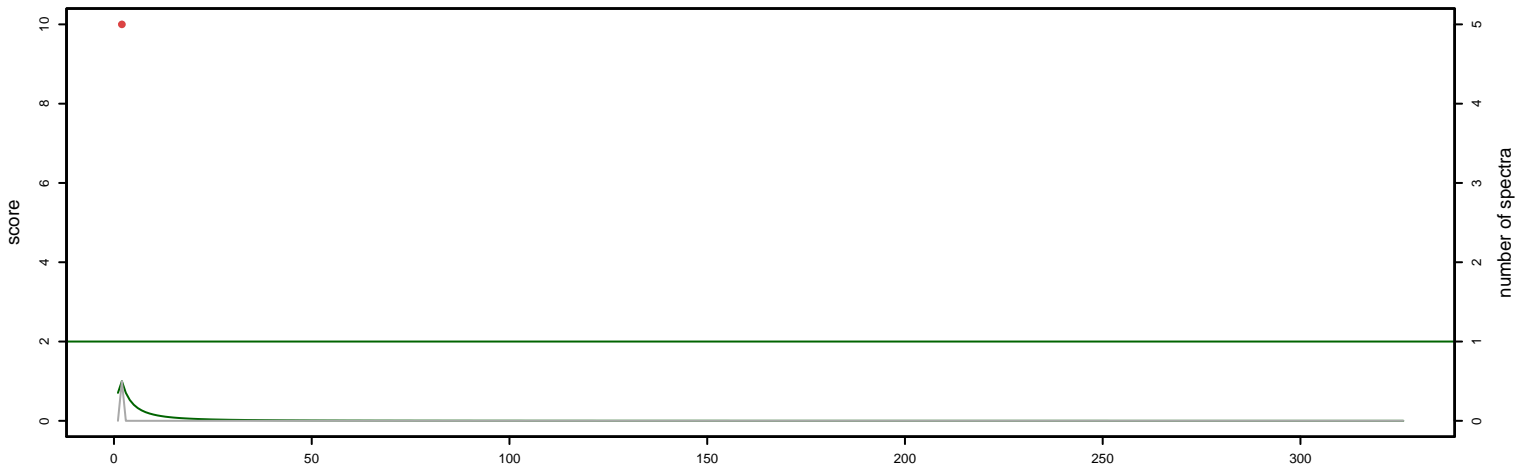

replica



stability





### Target of rapamycin complex subunit LST8 (Q9BVC4)

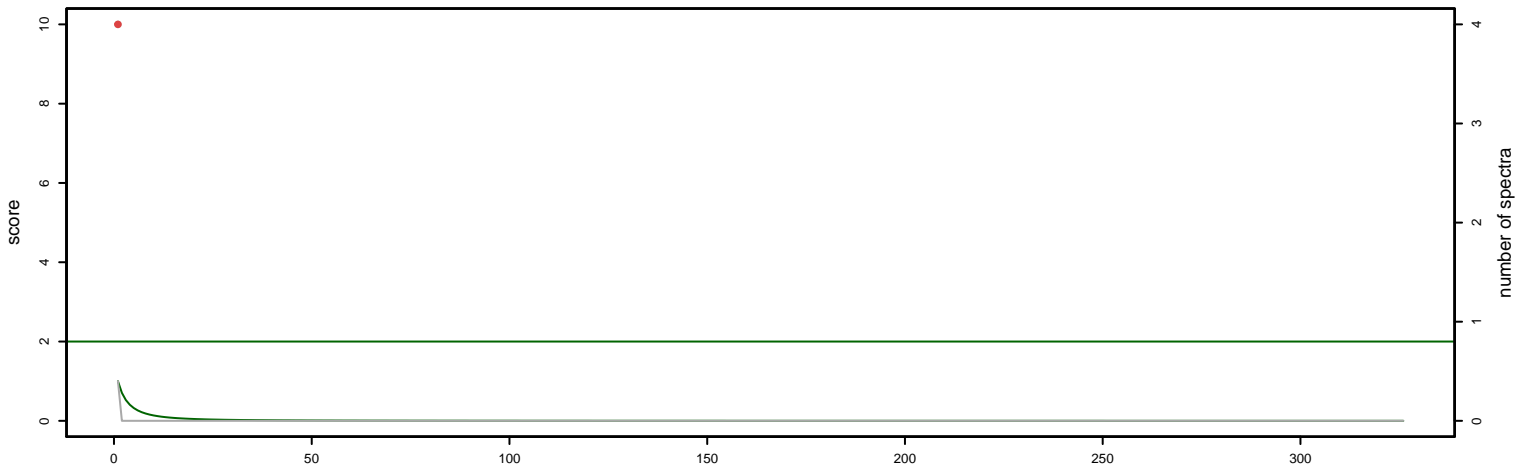

replica

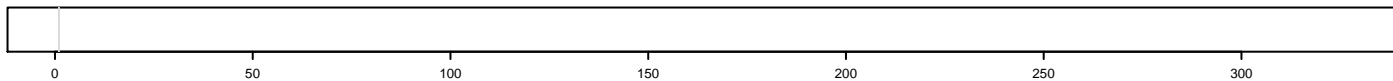

stability

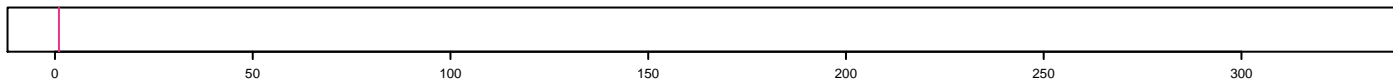

# Acetyl-CoA acetyltransferase, cytosolic (Q9BWD1)

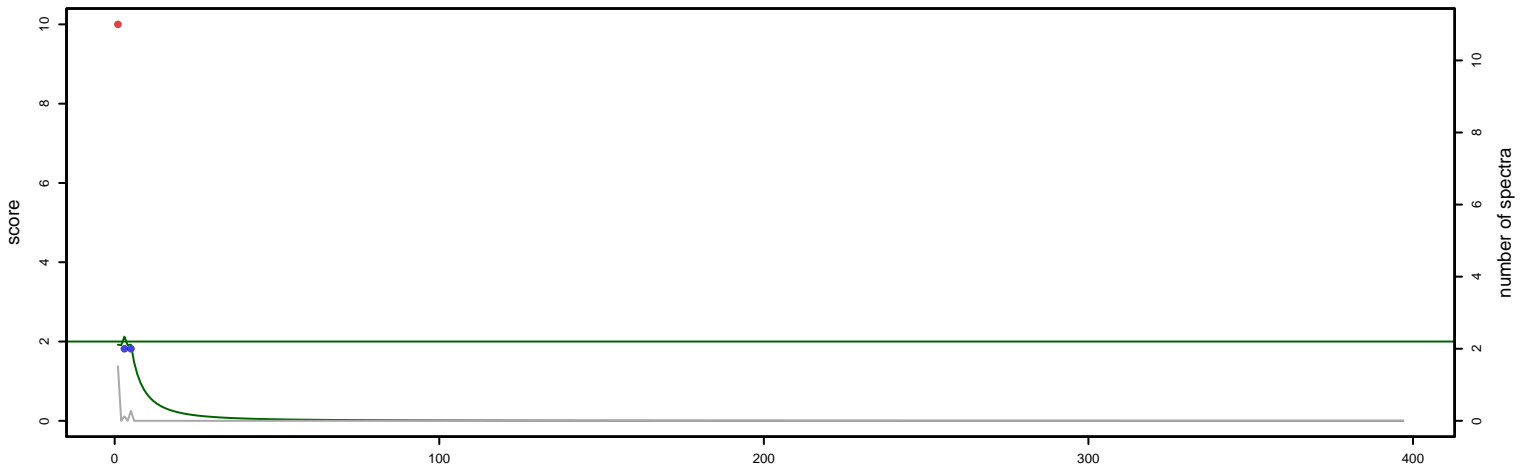

replica

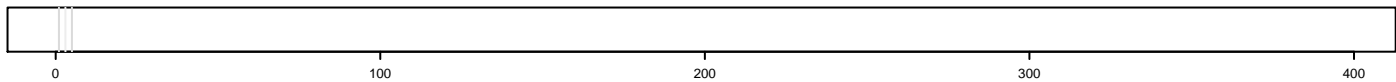

stability

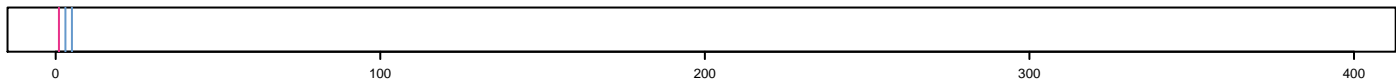

### Sulfiredoxin-1 (Q9BYN0)

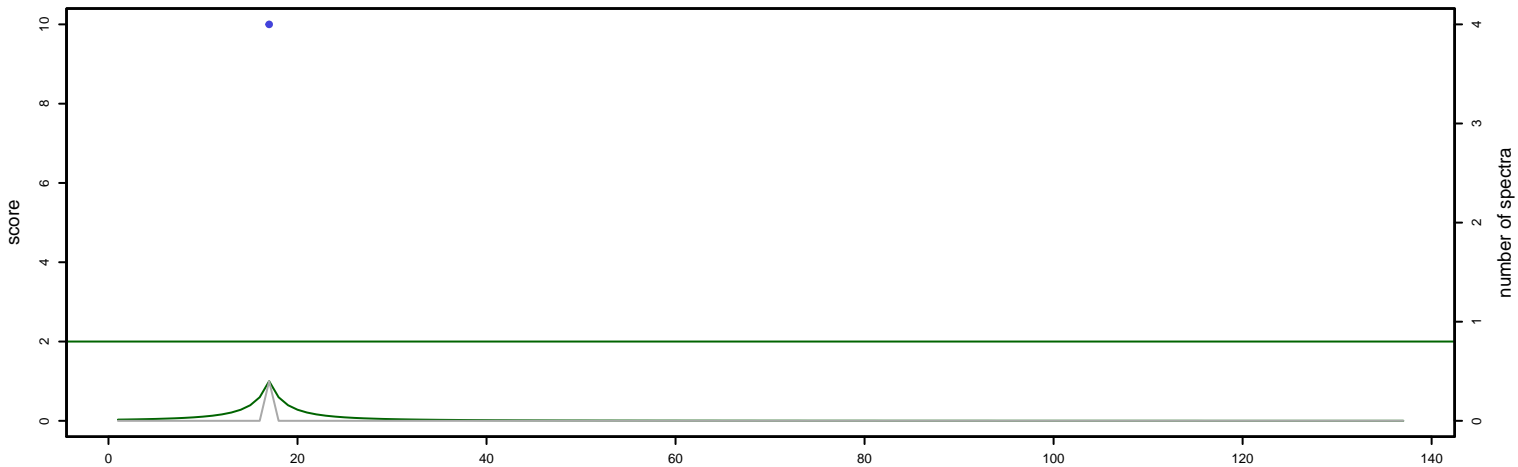

replica

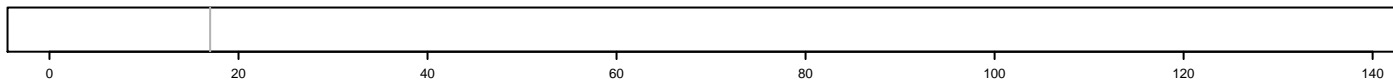

stability

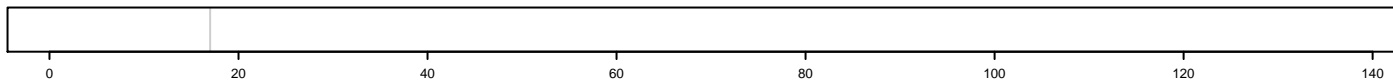

Pantothenate kinase 2, mitochondrial (Q9BZ23)

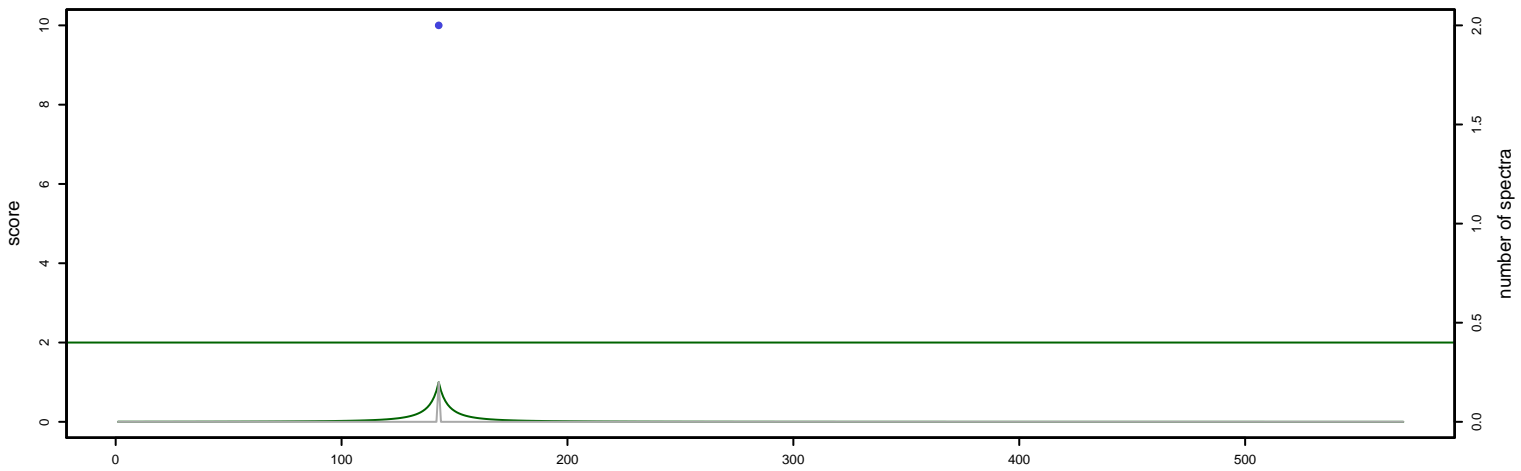

replica

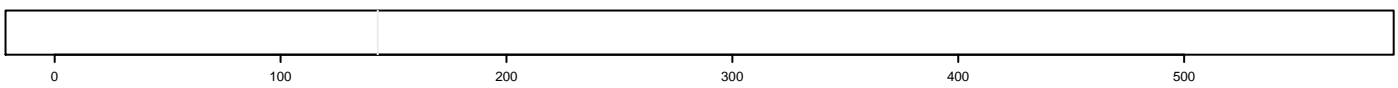

stability

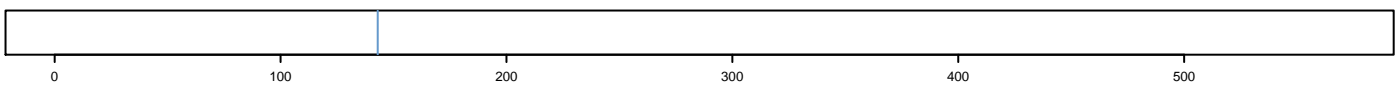

# Ubiquitin-like modifier-activating enzyme 5 (Q9GZZ9)

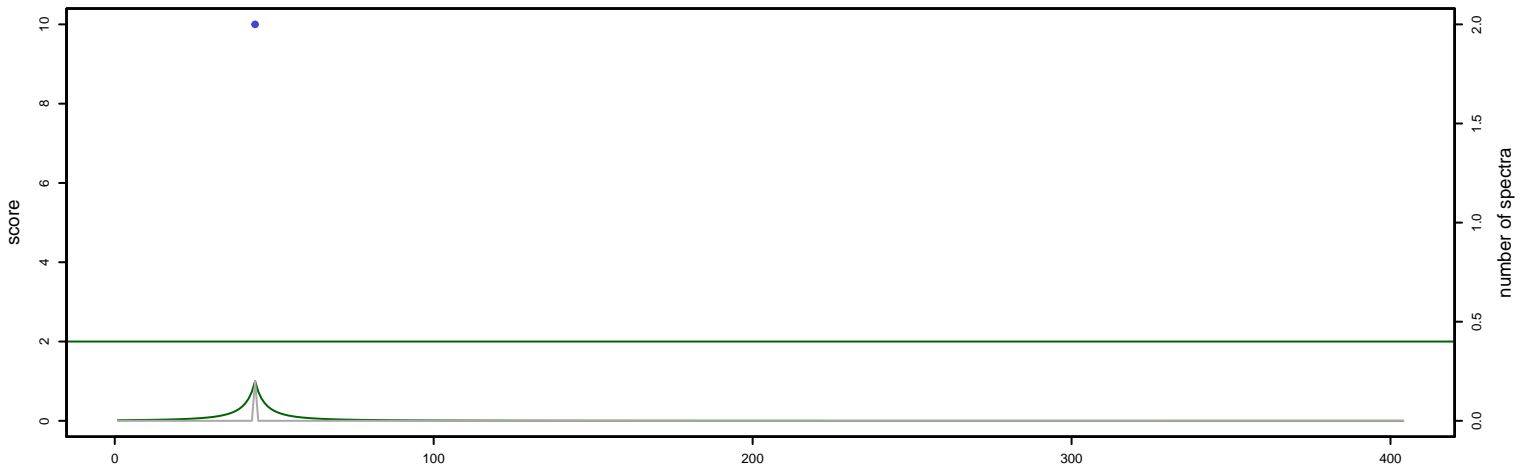

replica

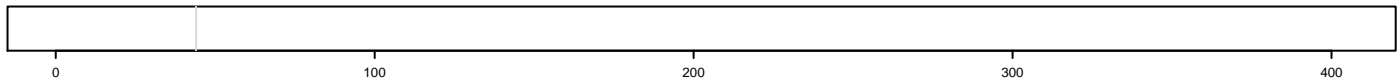

stability

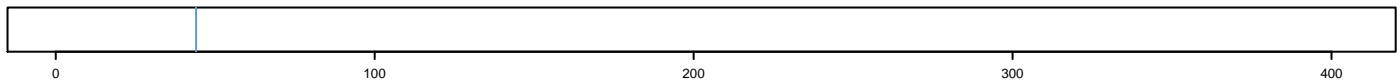

# Ras-related protein Rab-6C (Q9H0N0)

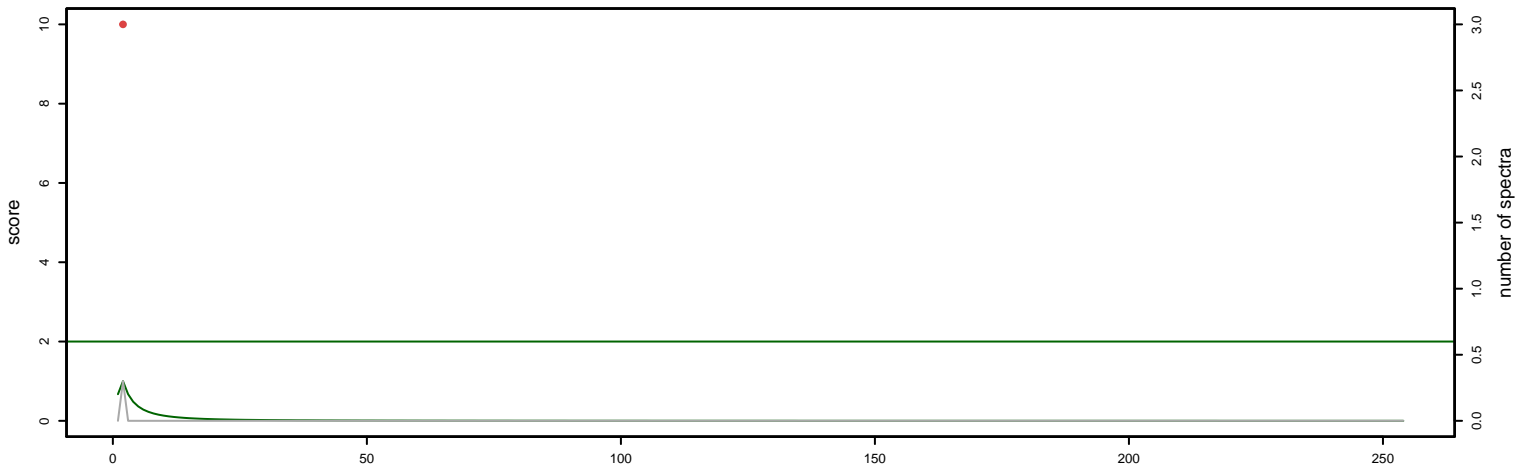

replica

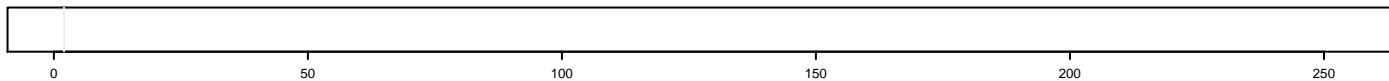

stability



### Cytosolic 5-nucleotidase 3 (Q9H0P0-1)

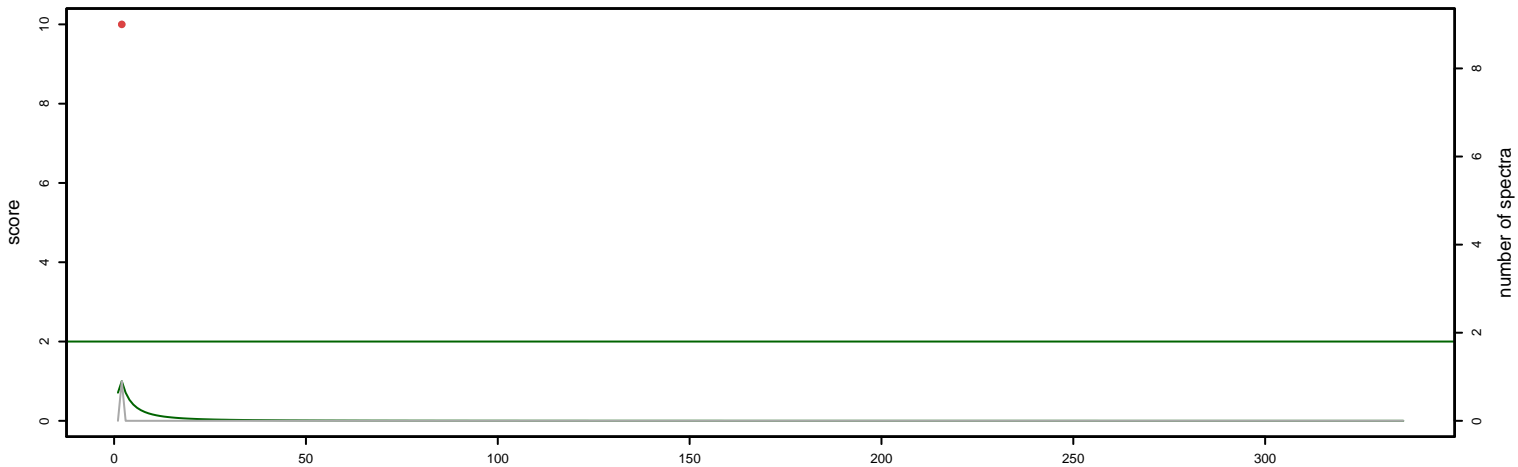

replica

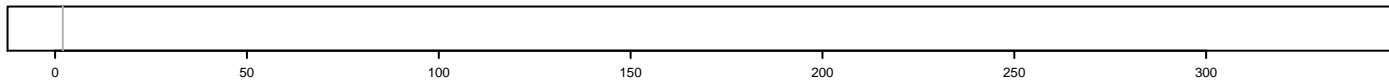

stability

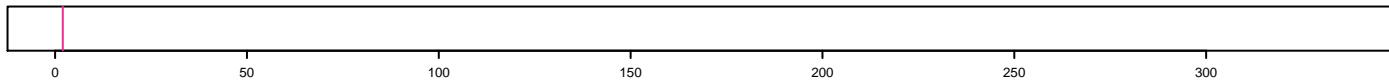

### Ras-related protein Rab-1B (Q9H0U4)

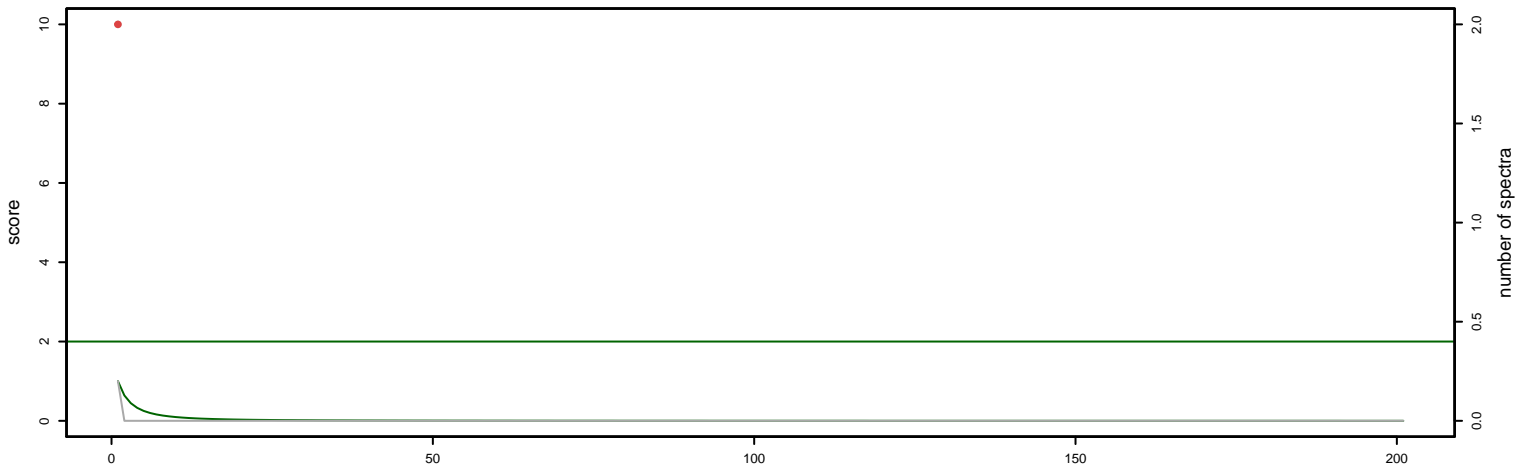

replica

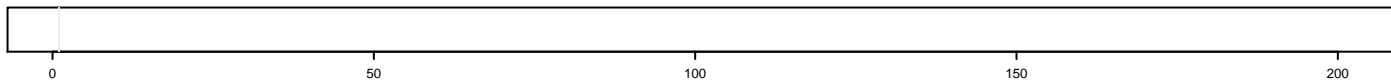

stability

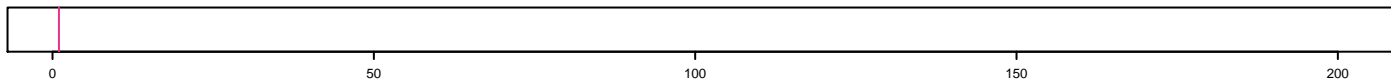



### Thioredoxin-related transmembrane protein 4 (Q9H1E5)

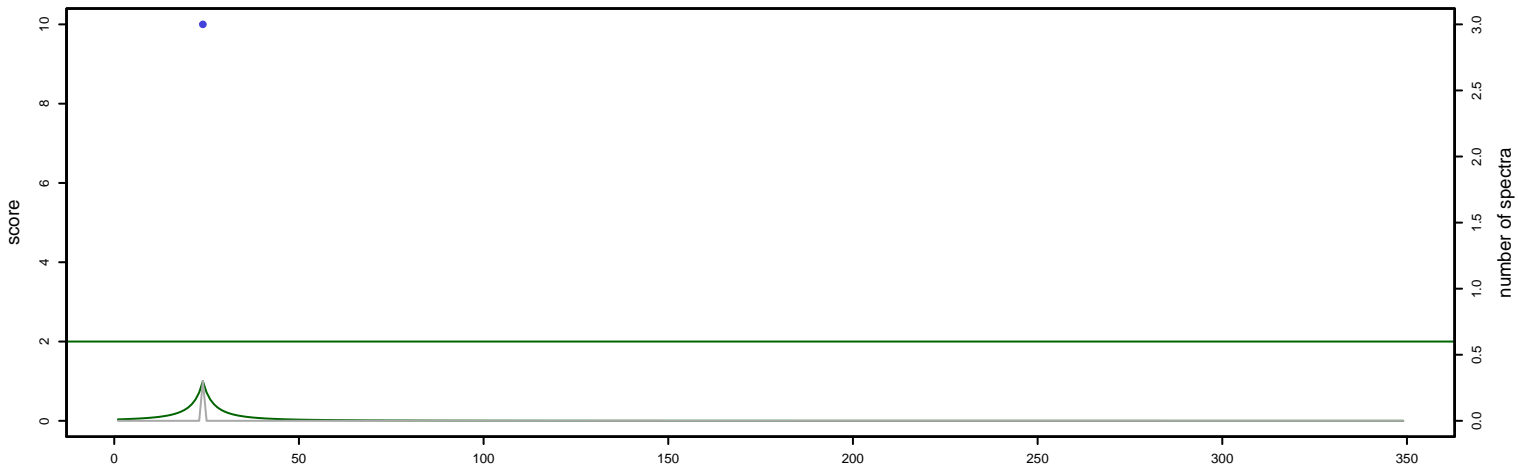

replica

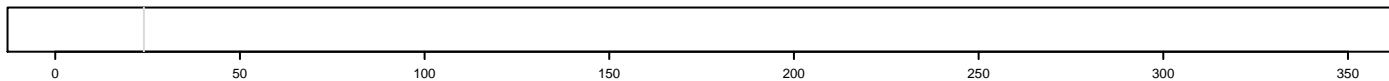

stability

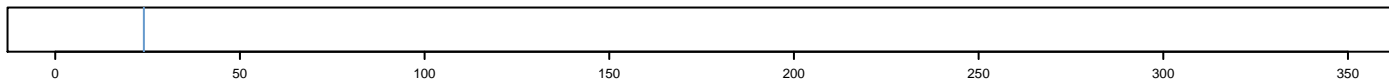

### SH3 domain-binding glutamic acid-rich-like protein 3 (Q9H299)

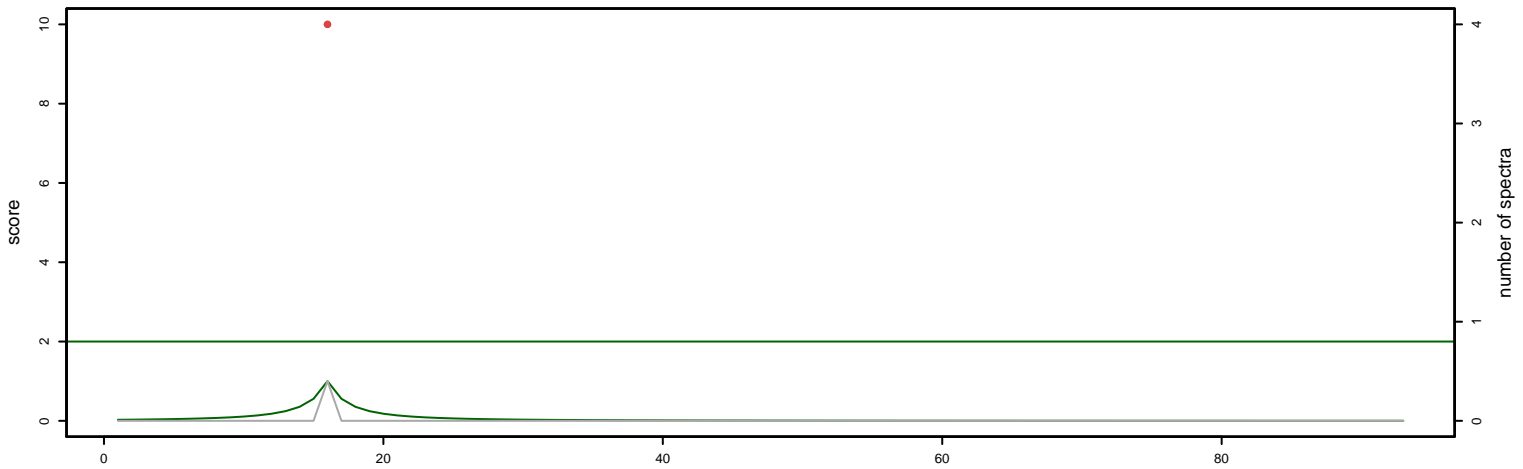

replica

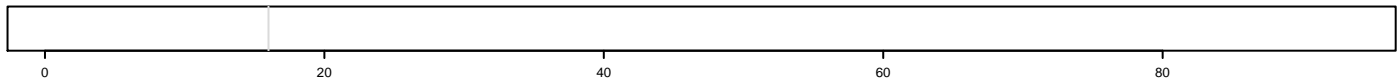

stability

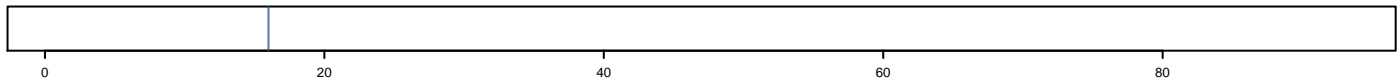

# Gigaxonin (Q9H2C0)

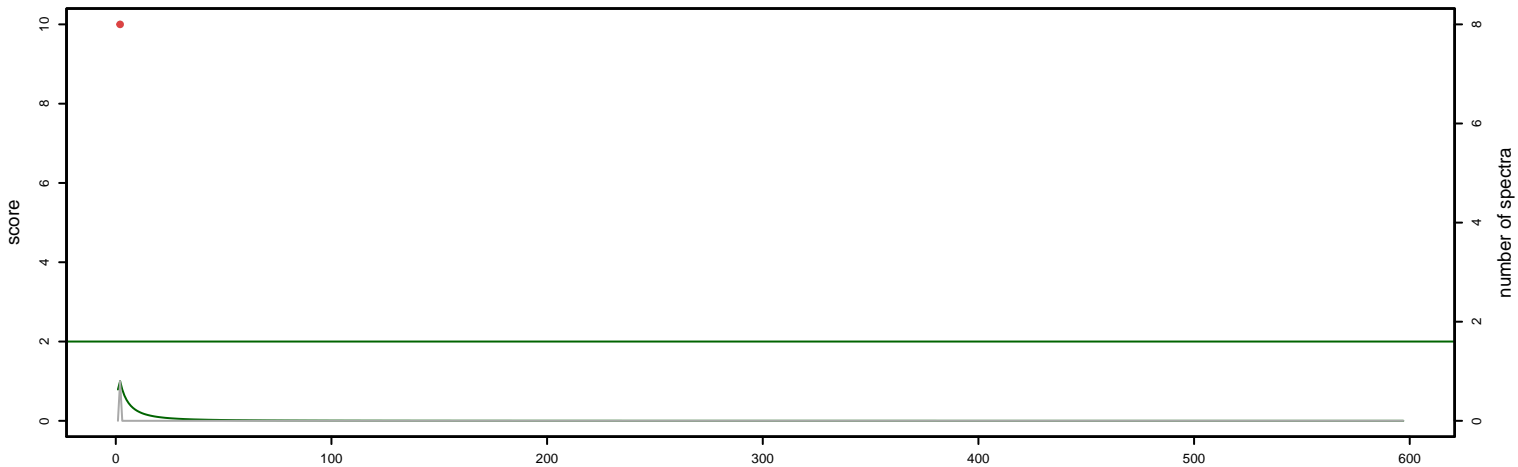

## replica

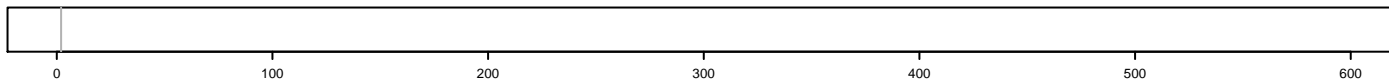

## stability

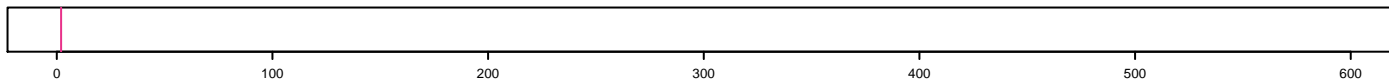

### Inorganic pyrophosphatase 2, mitochondrial (Q9H2U2)

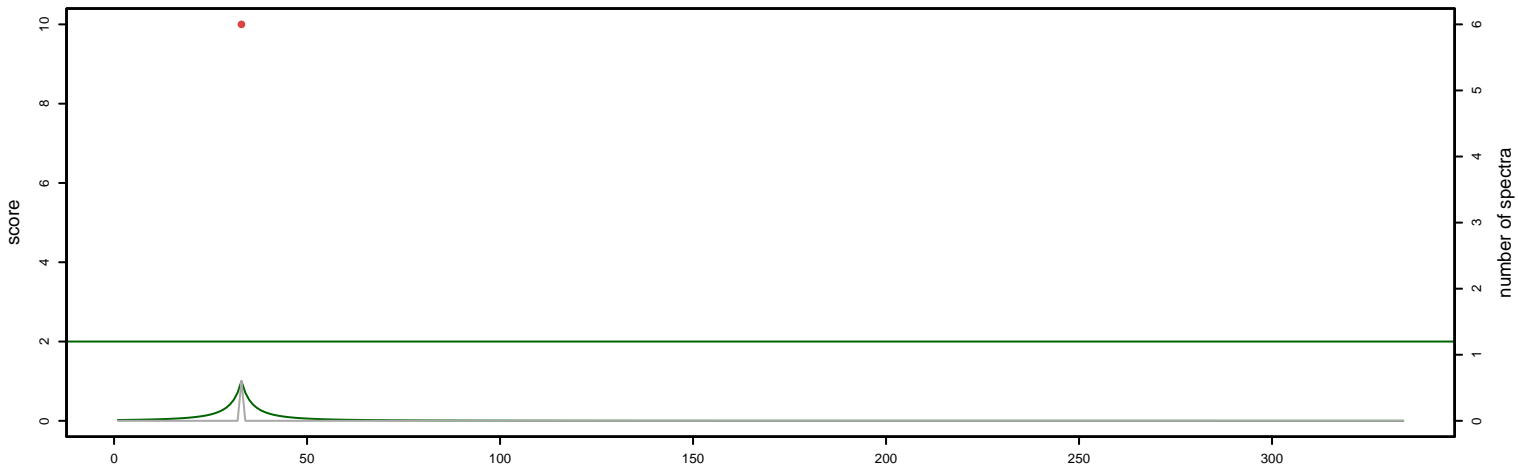

replica

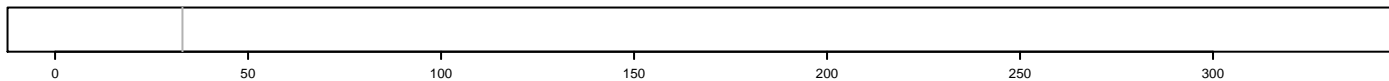

stability

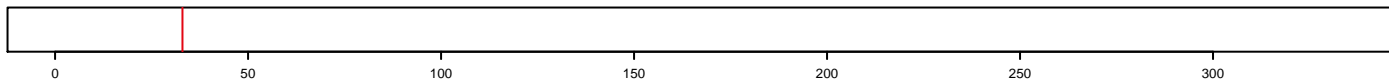

### BoIA-like protein 2 (Q9H3K6)

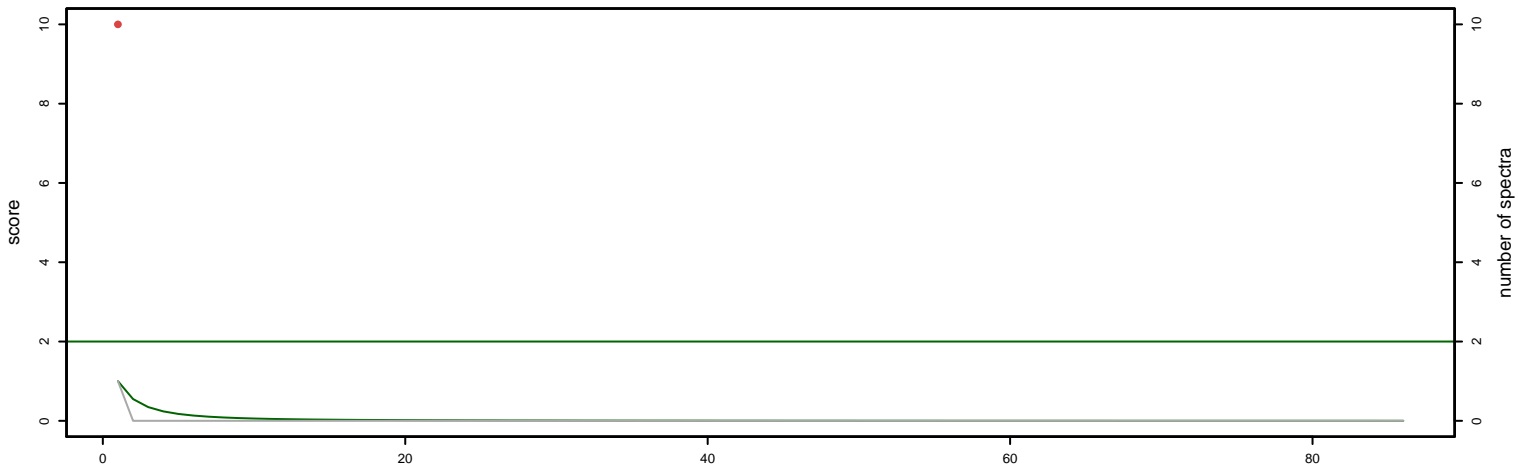

replica

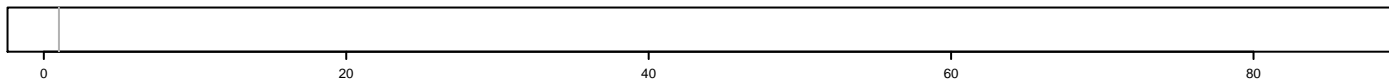

stability

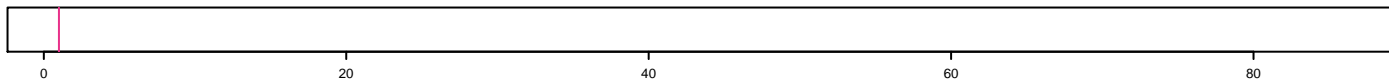

### Charged multivesicular body protein 4b (Q9H444)

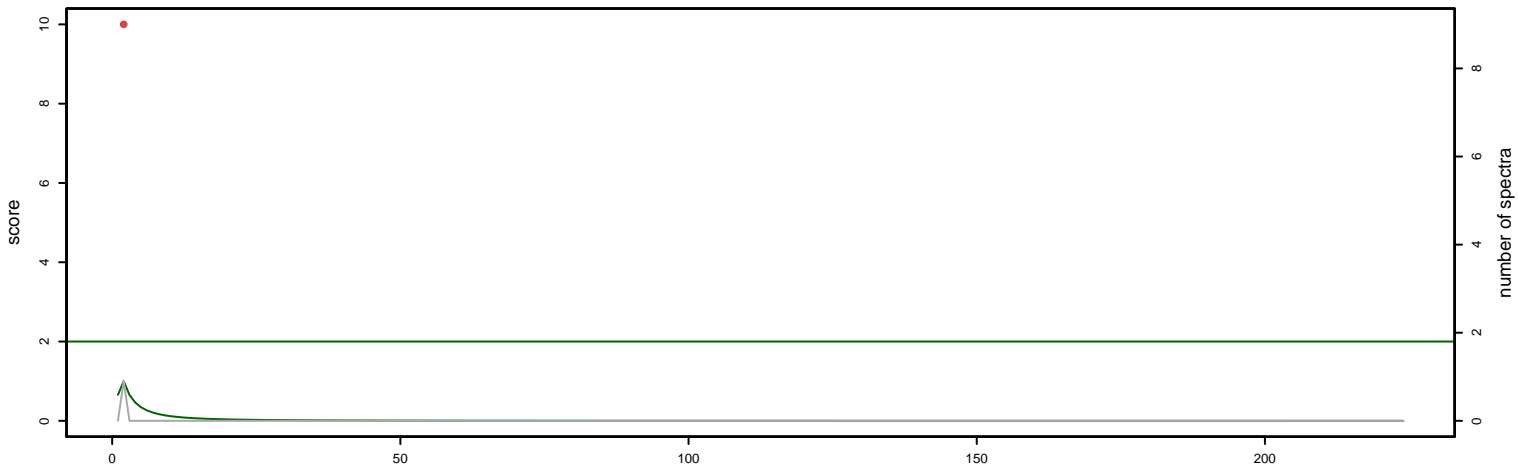

replica

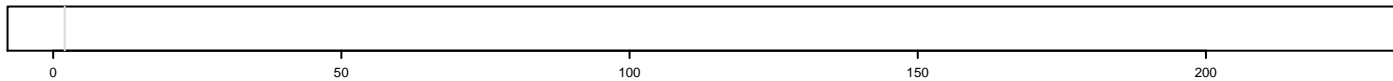

stability

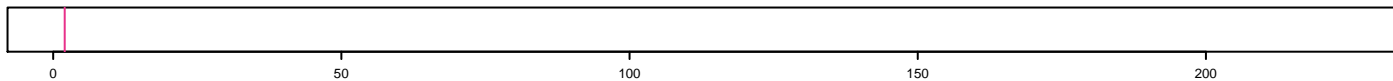

# RWD domain-containing protein 1 (Q9H446)

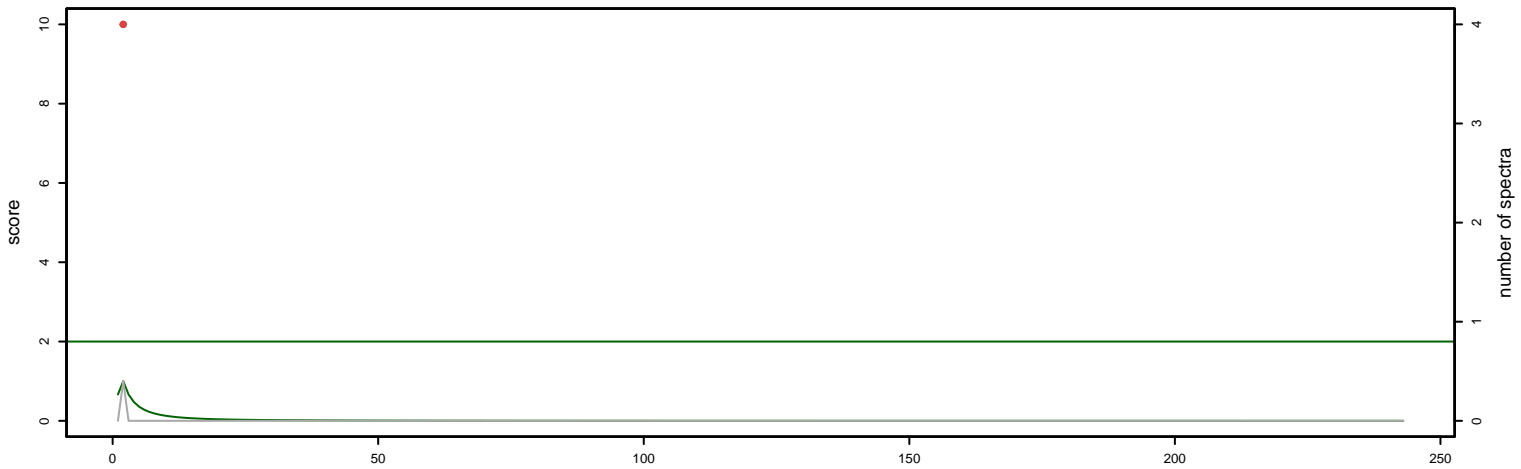

replica

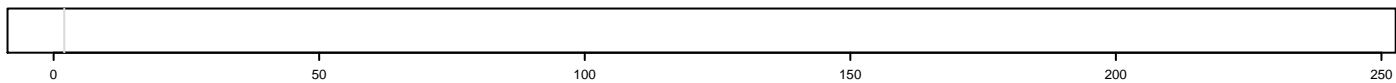

stability

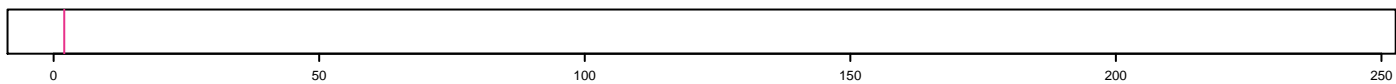

# MIP18 family protein FAM96A (Q9H5X1)

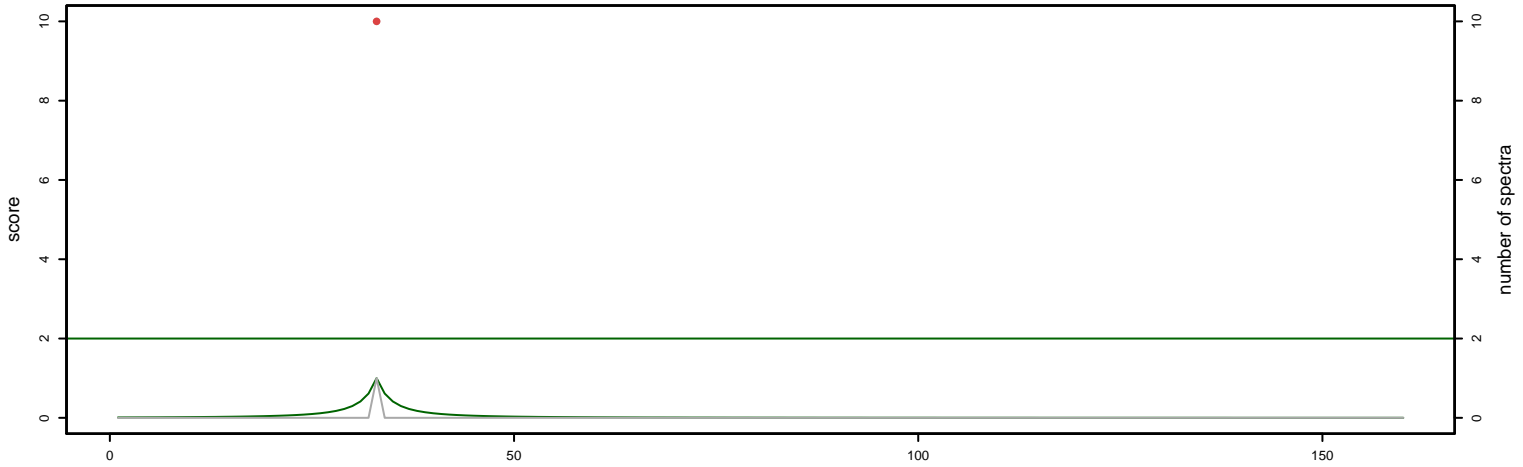

replica

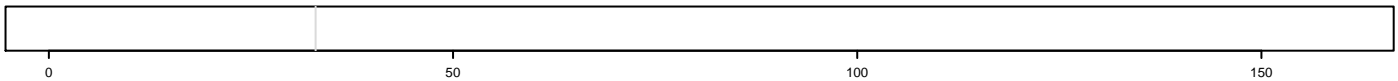

stability

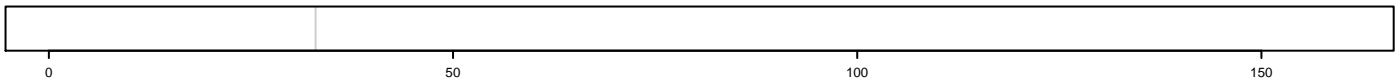



Protein FAM188A (Q9H8M7)

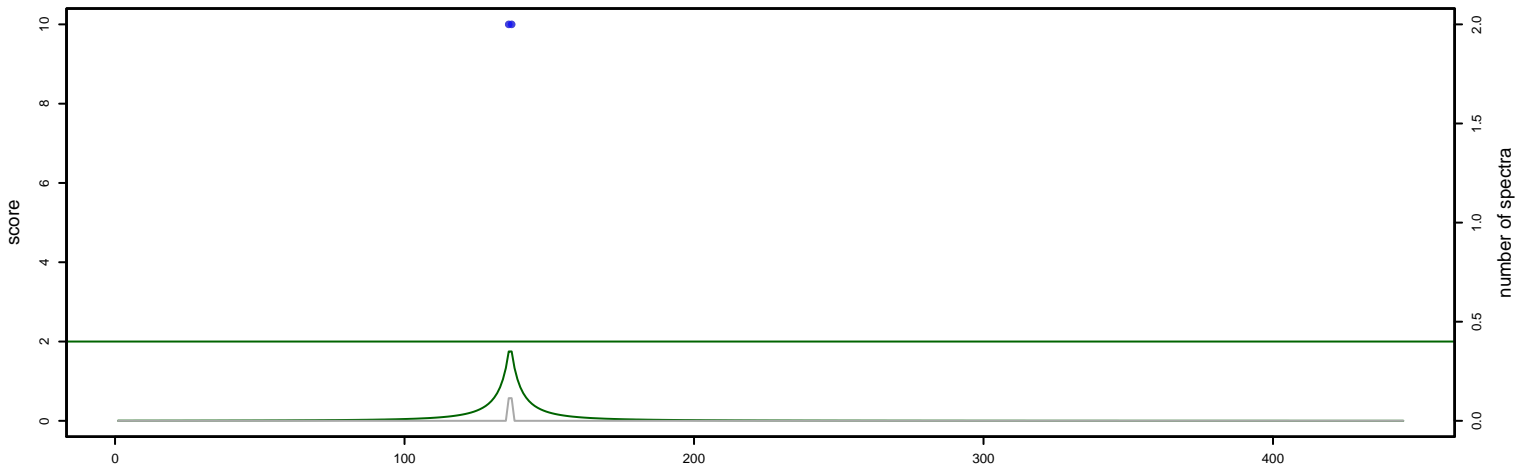

replica

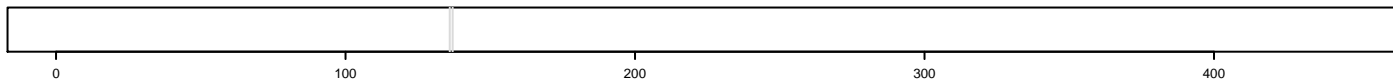

stability

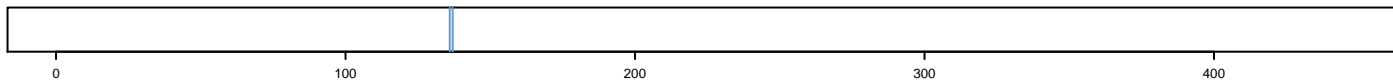

### Protein argonaute-3 (Q9H9G7)

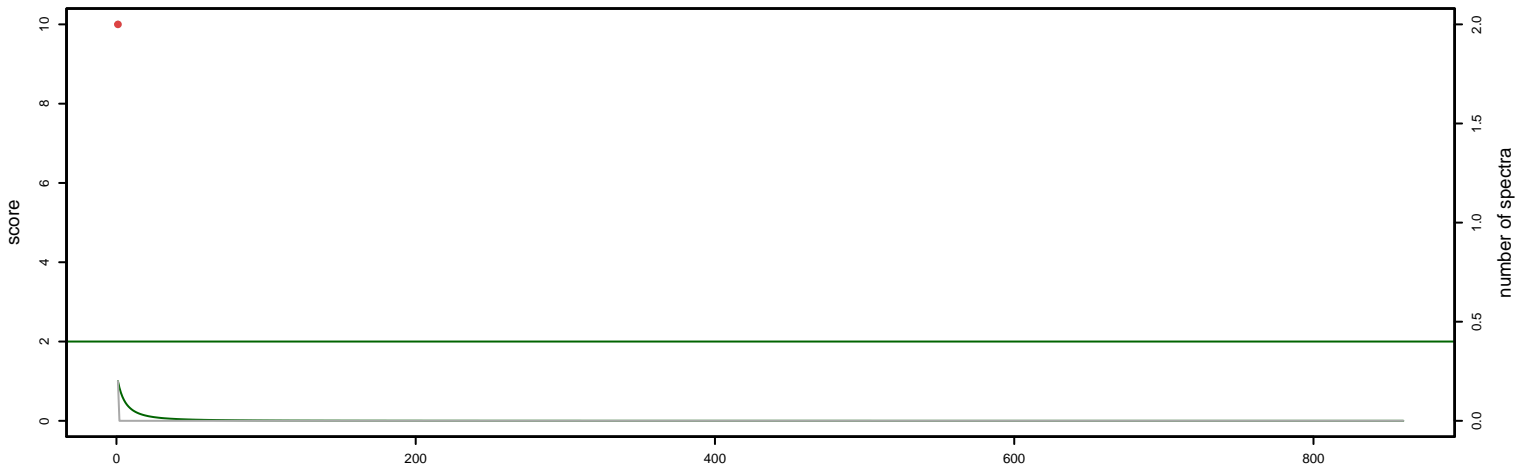

replica

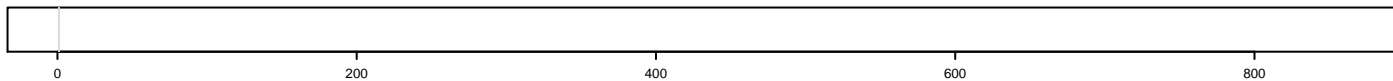

stability

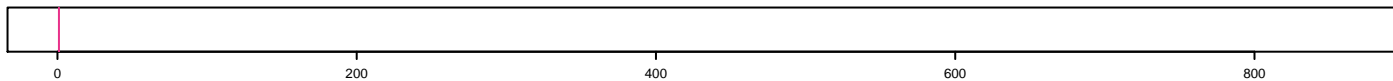

### Phosphopantothenate--cysteine ligase (Q9HAB8)

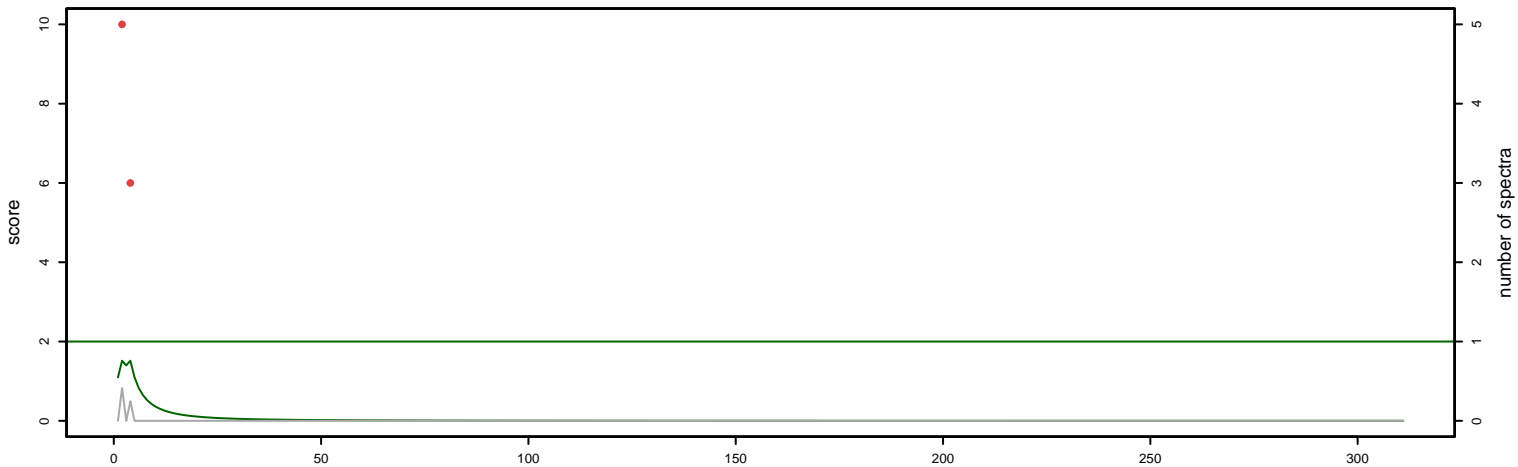

replica

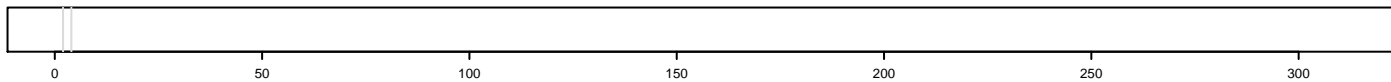

stability

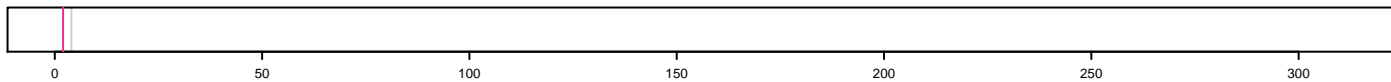

# Synembryn-A (Q9NPQ8)

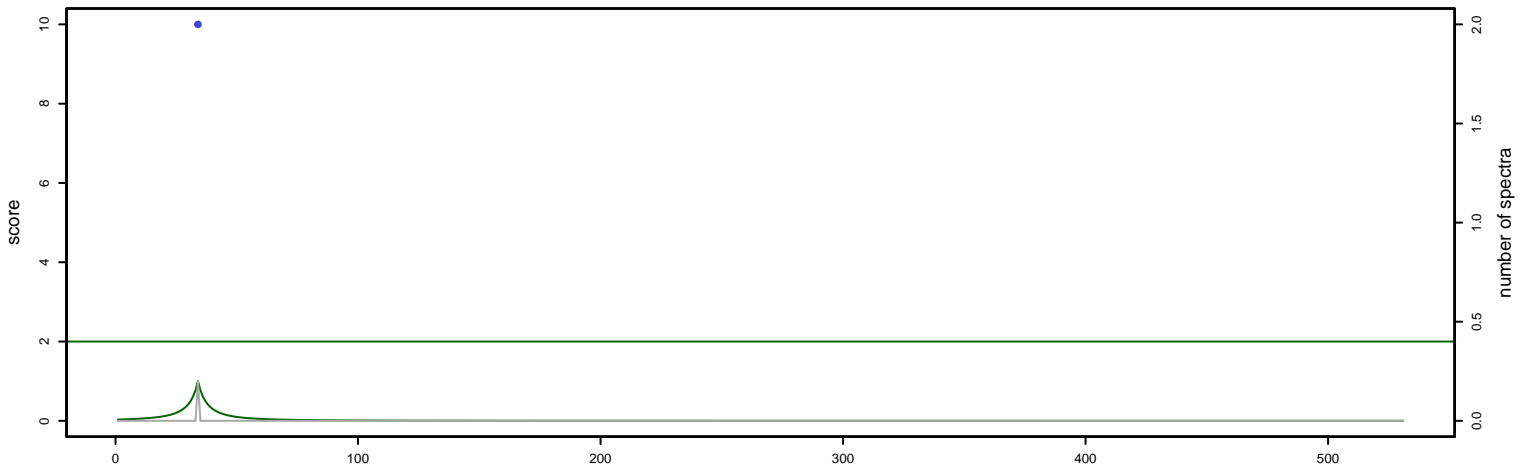

replica

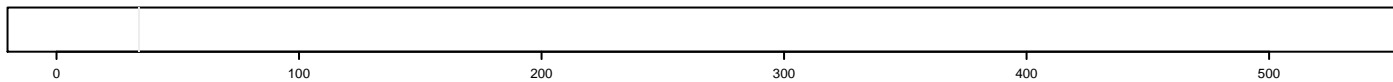

stability

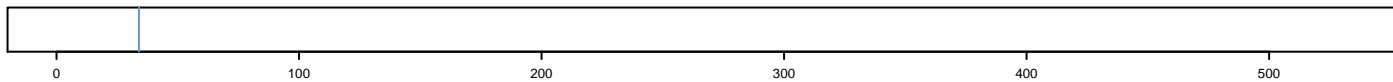

### Xaa-Pro aminopeptidase 1 (Q9NQW7)

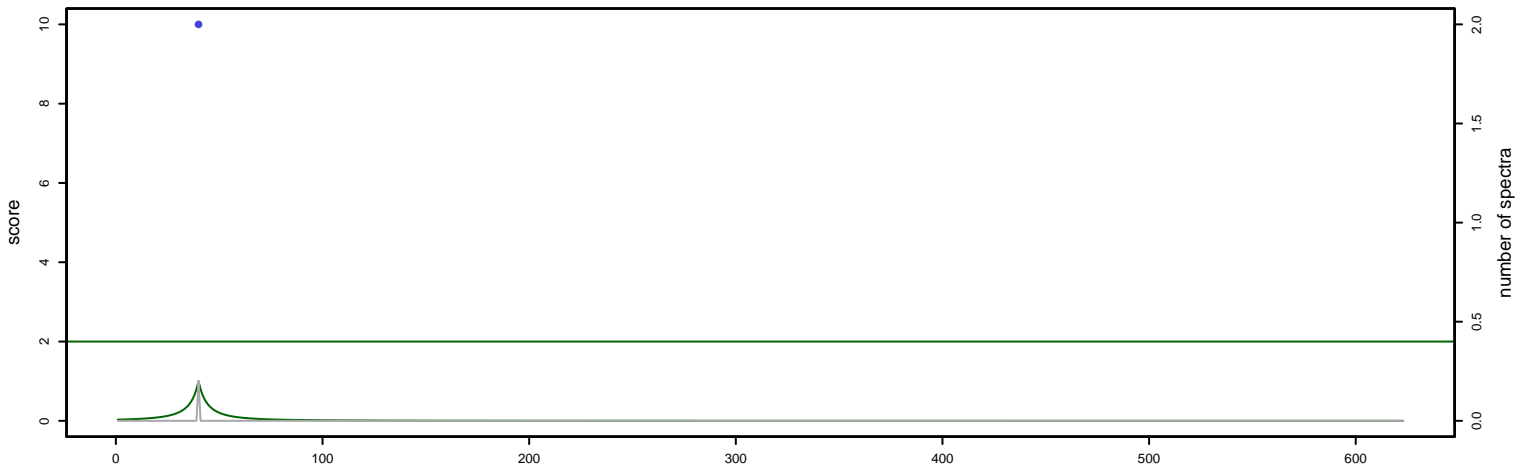

replica

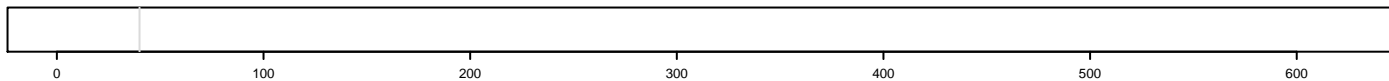

stability

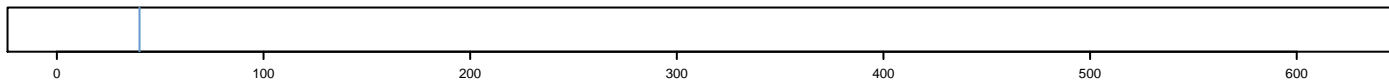

# Gephyrin (Q9NQX3)

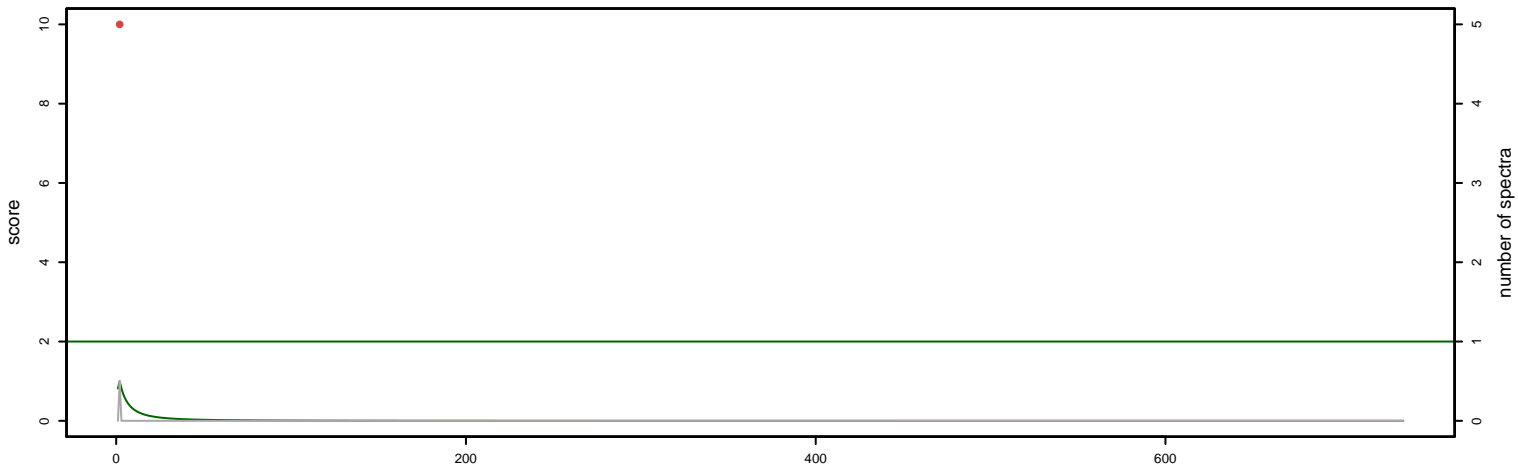

## replica

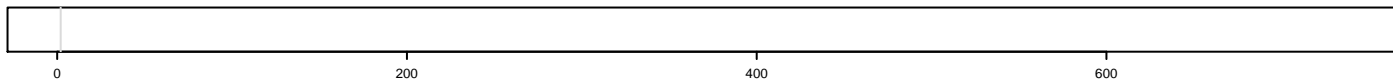

## stability

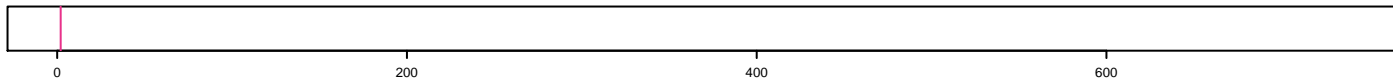

### Ubiquitin-like-conjugating enzyme ATG3 (Q9NT62)

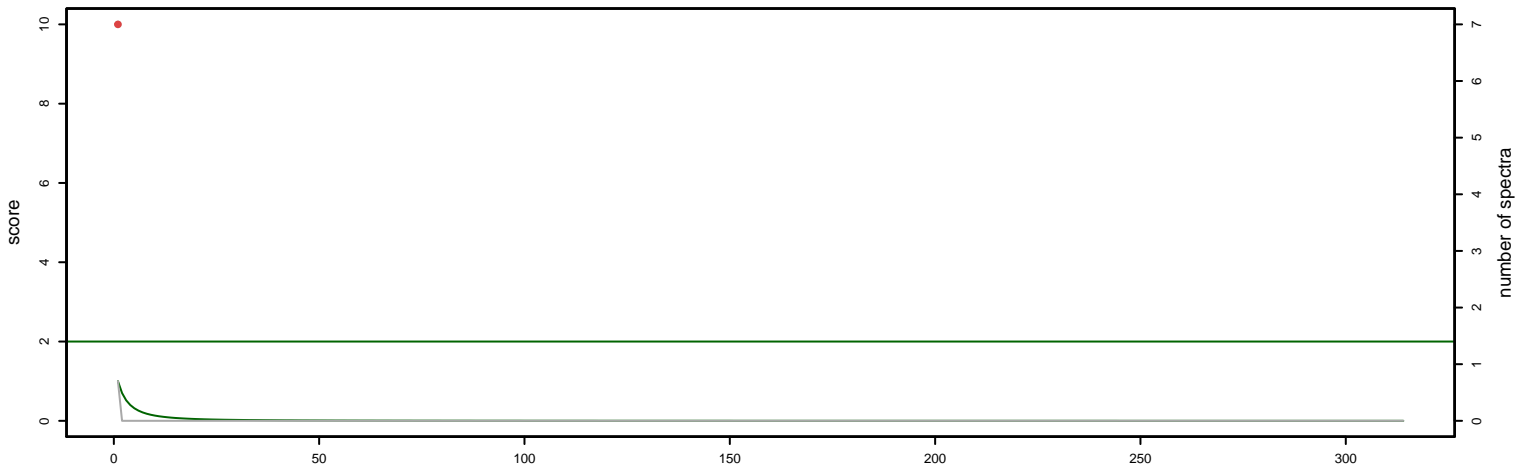

replica

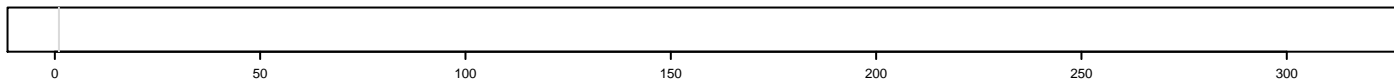

stability

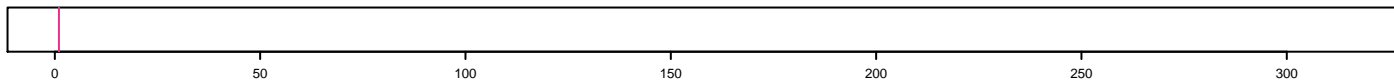

# UPF0515 protein C19orf66 (Q9NUL5)



replica

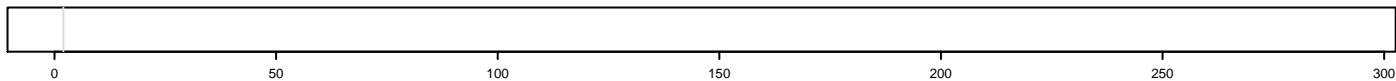

stability





### Adaptin ear-binding coat-associated protein 2 (Q9NVZ3)

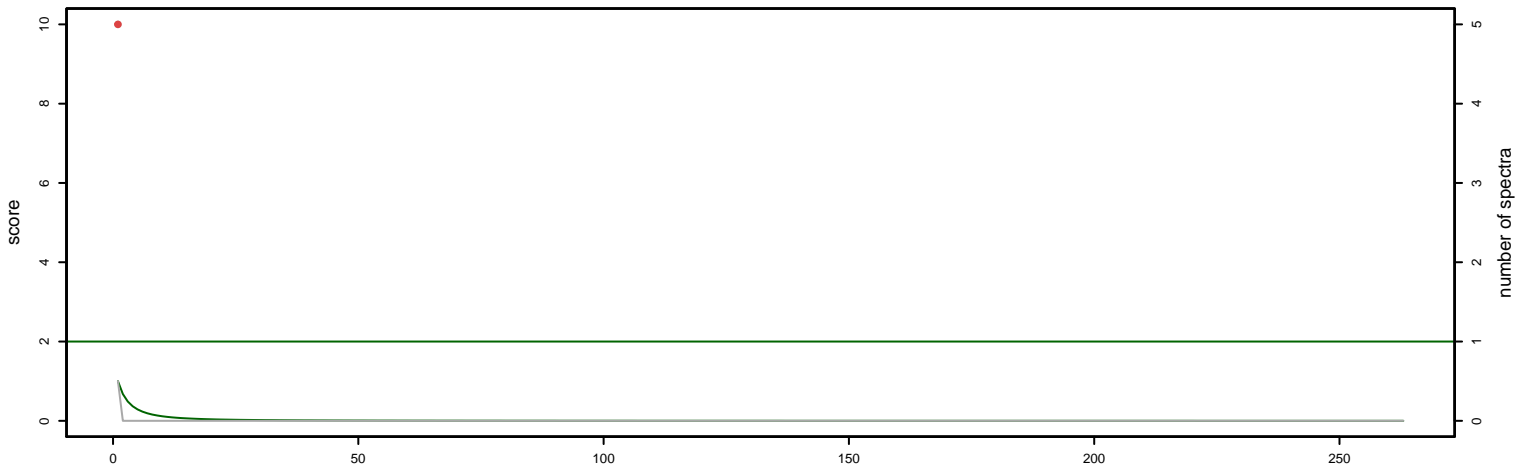

replica

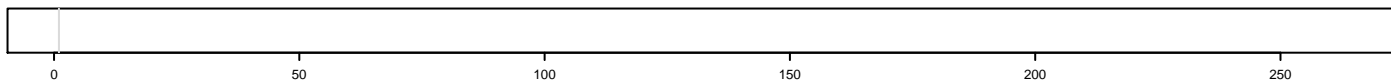

stability

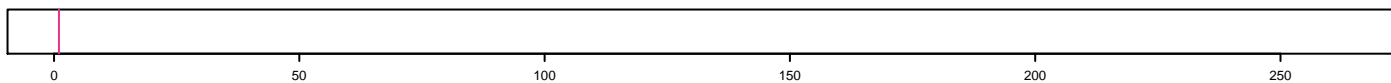

Probable tRNA(His) guanylyltransferase (Q9NWX6)

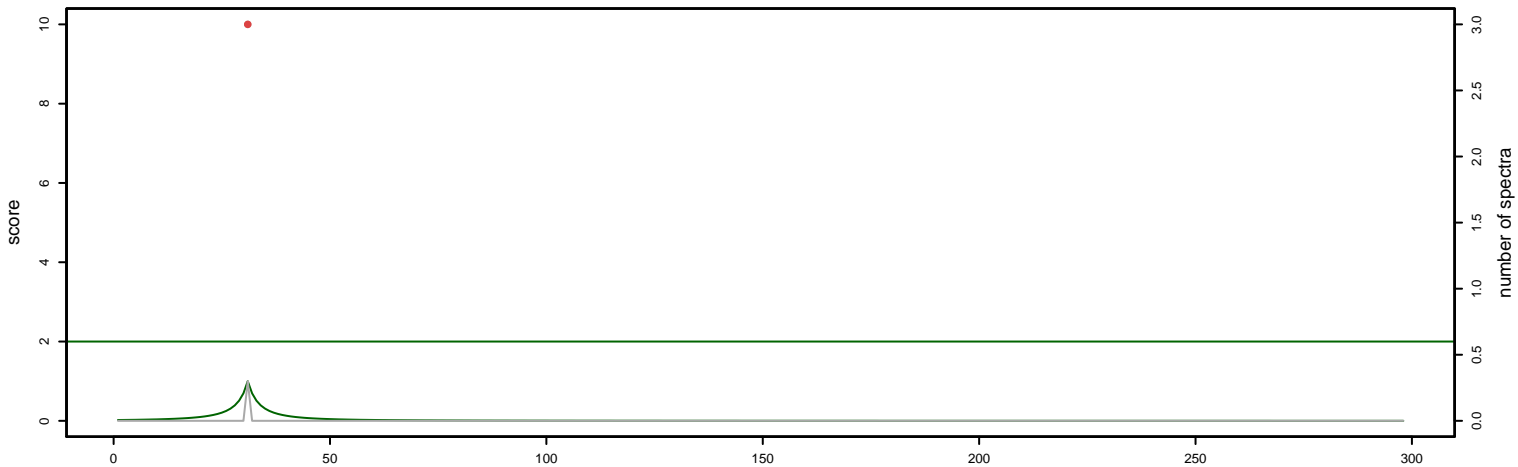

replica

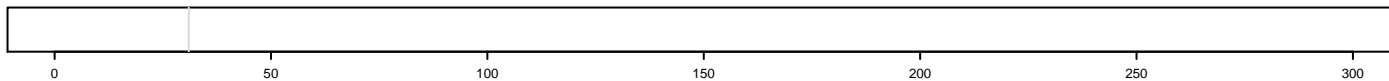

stability

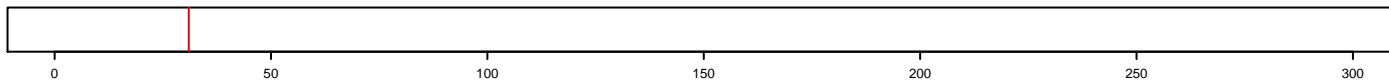

# Interleukin-1 receptor-associated kinase 4 (Q9NWZ3)

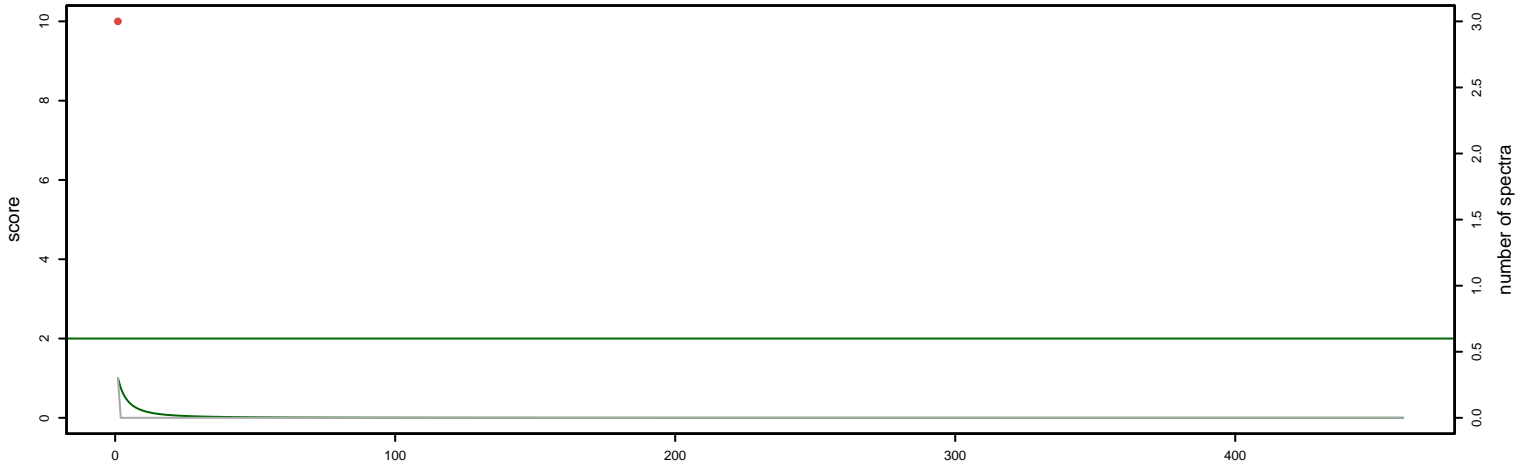

replica

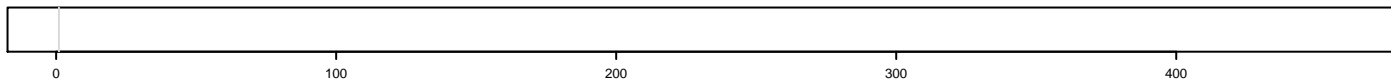

stability

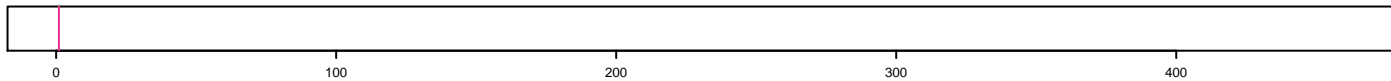



# BRCA1-A complex subunit BRE (Q9NXR7)

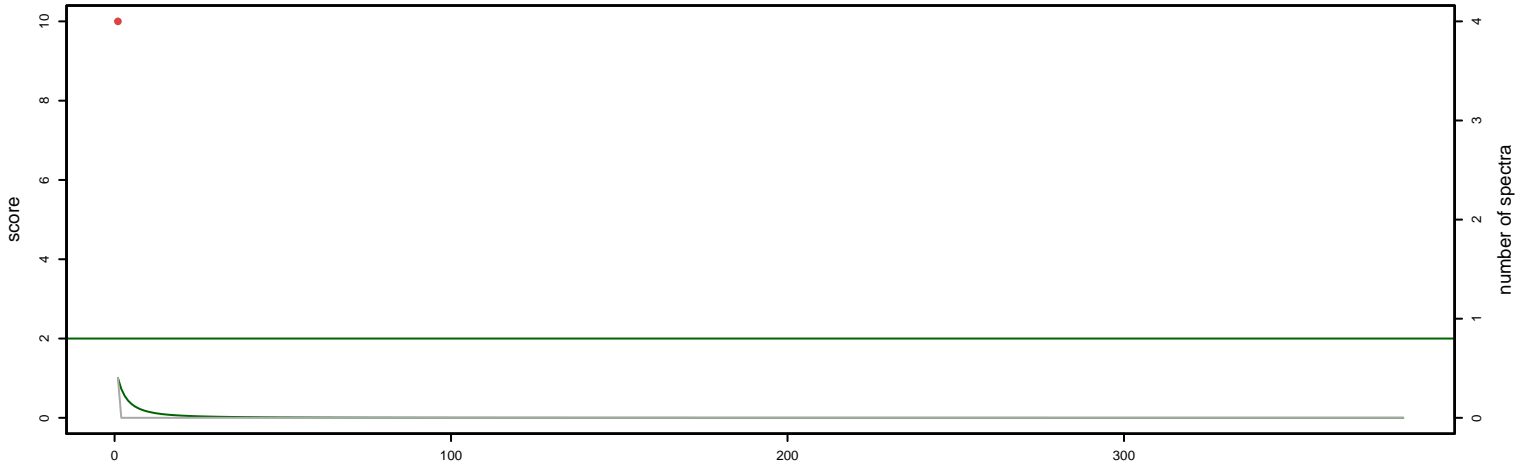

replica

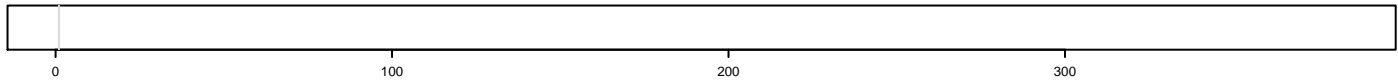

stability

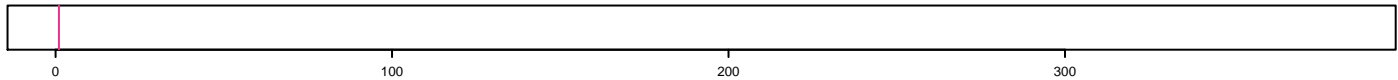

# Dipeptidyl peptidase 3 (Q9NY33)

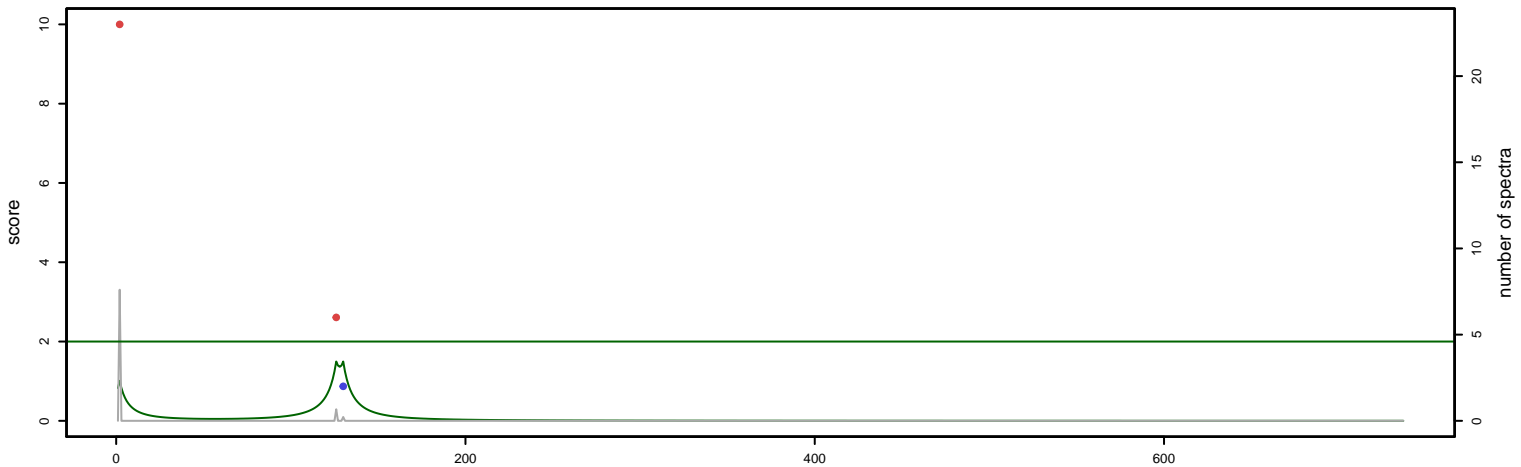

replica

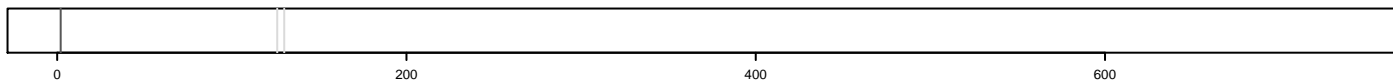

stability

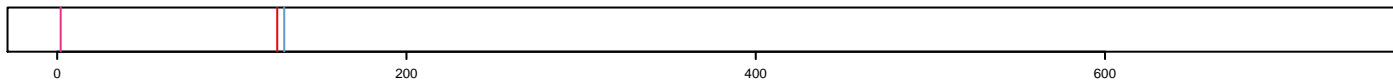

# Alpha-hemoglobin-stabilizing protein (Q9NZD4)

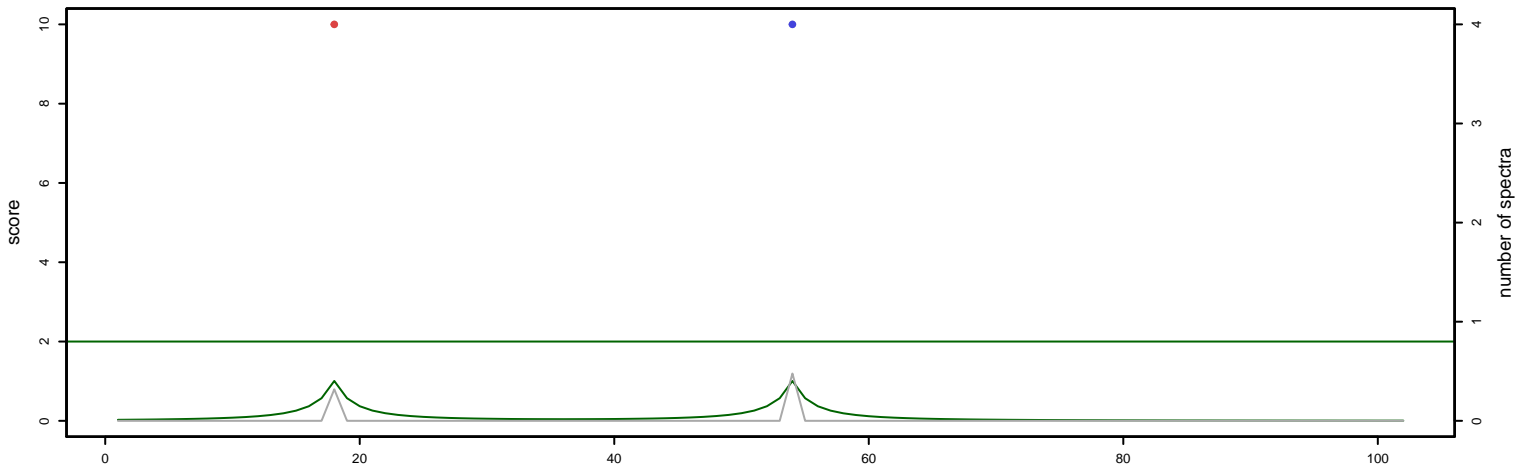

replica

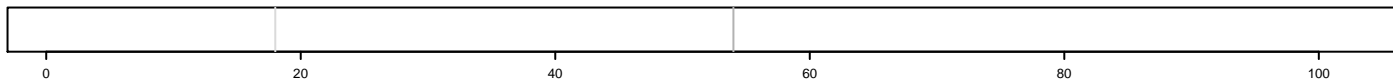

stability

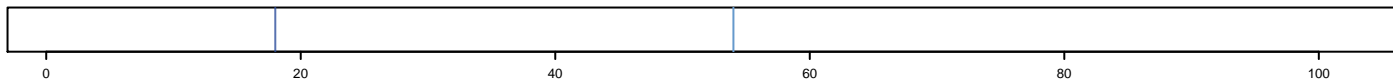

### Costars family protein ABRACL (Q9P1F3)

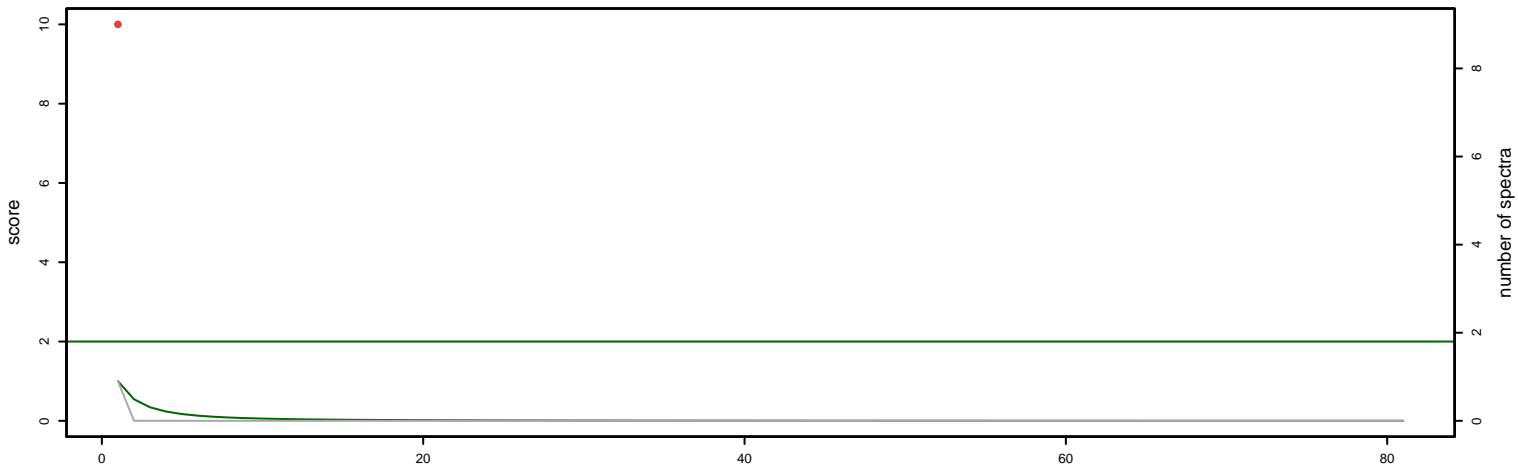

replica

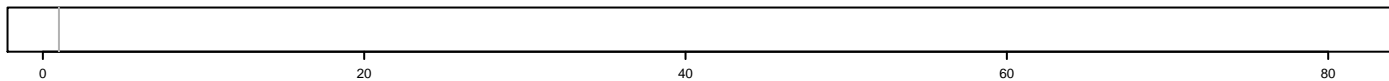

stability

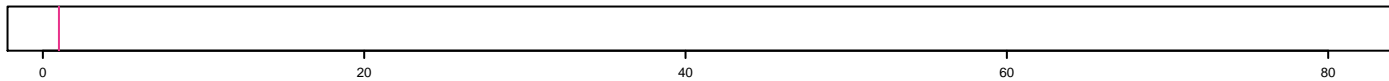



# Ankyrin repeat and FYVE domain-containing protein 1 (Q9P2R3)

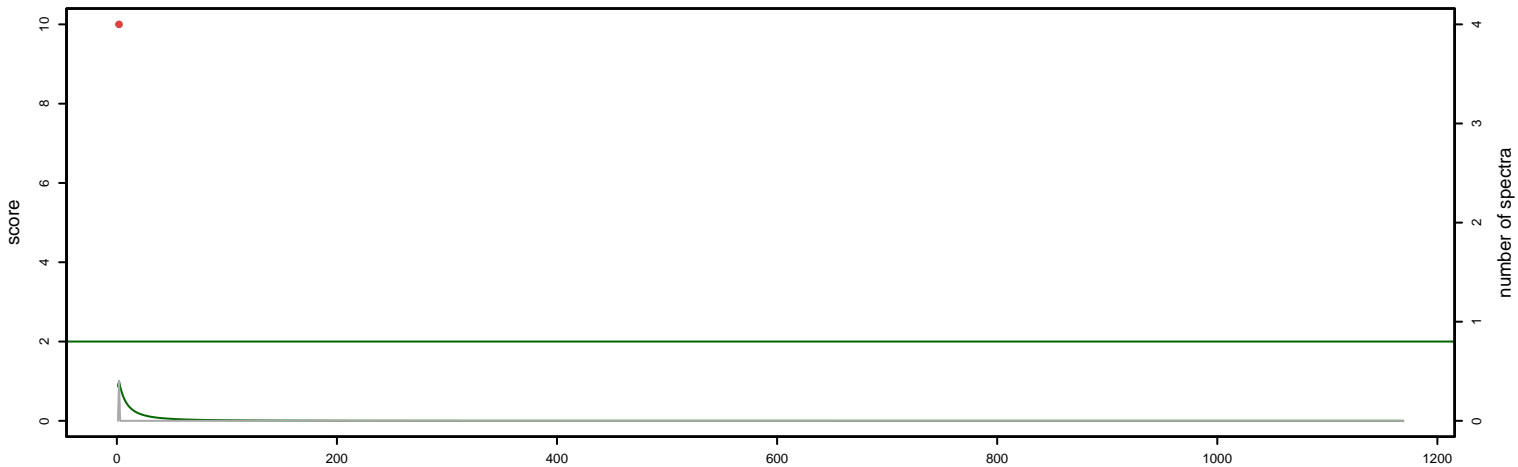

replica

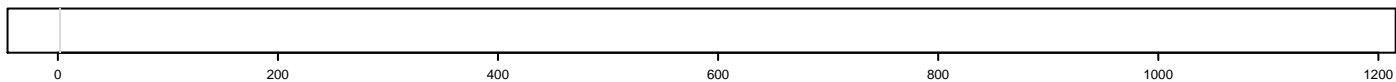

stability

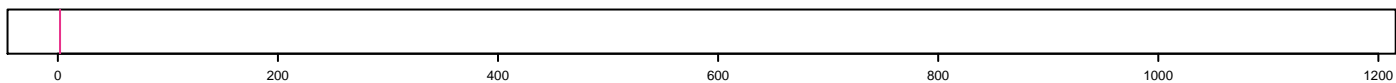

### Gamma-adducin (Q9UEY8)

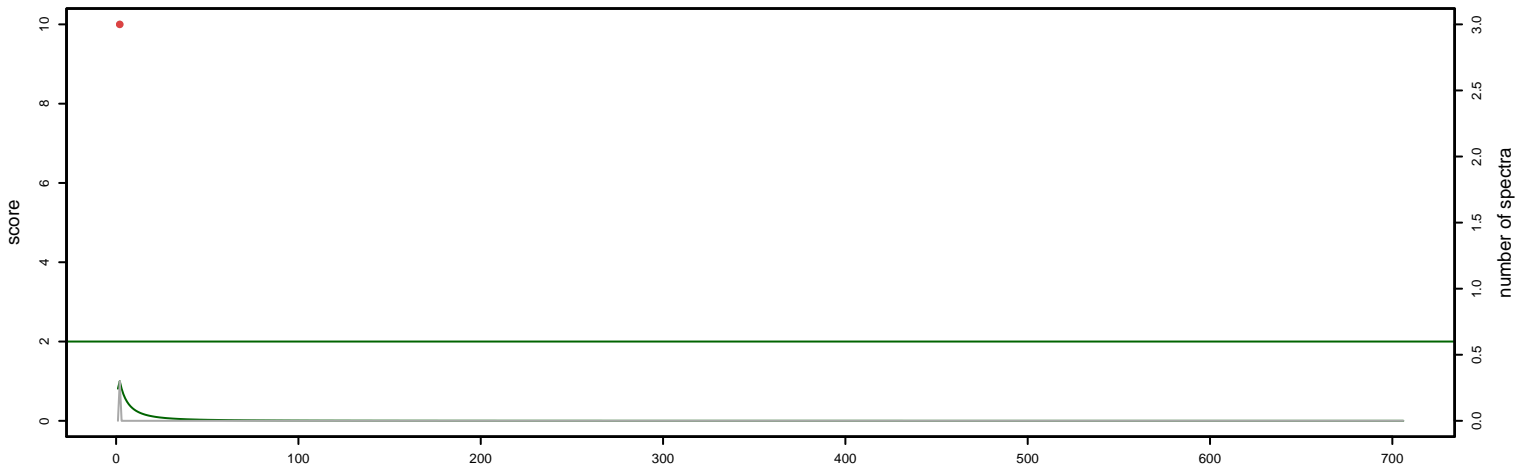

replica

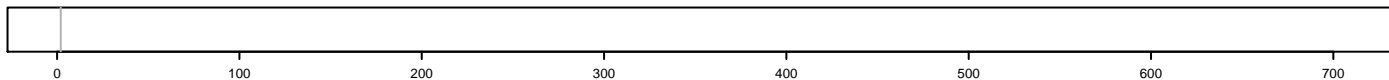

stability

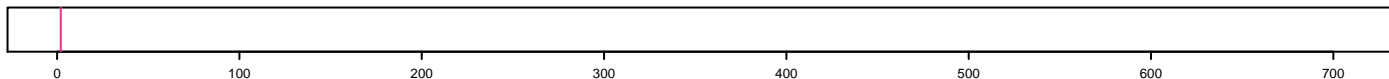

### Cysteine and histidine-rich domain-containing protein 1 (Q9UHD1)

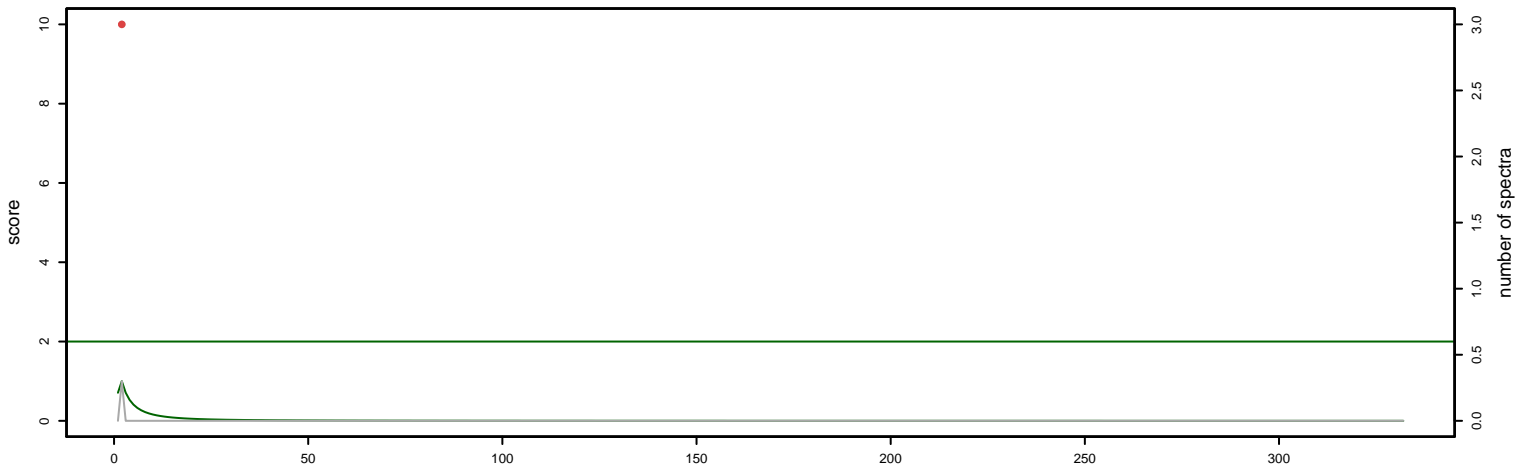

replica

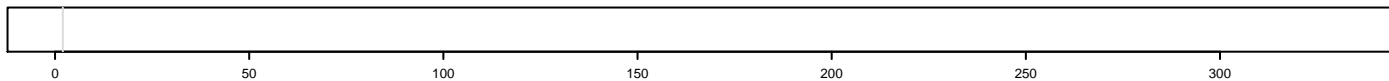

stability

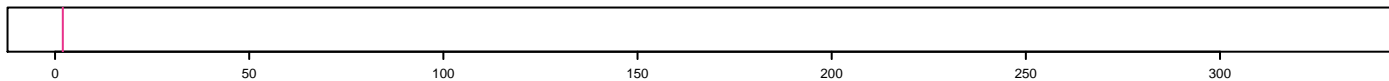

### Exportin-7 (Q9UIA9)

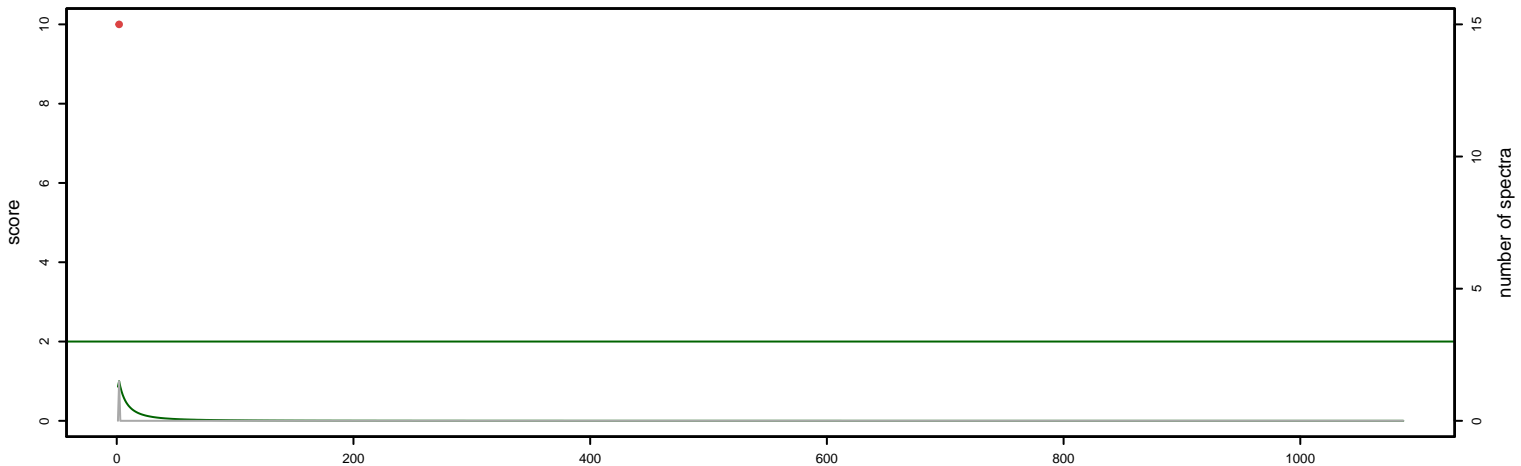

### replica

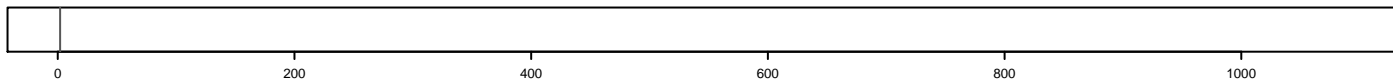

### stability

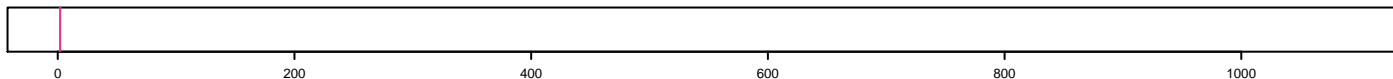

# N-acetyl-D-glucosamine kinase (Q9UJ70)

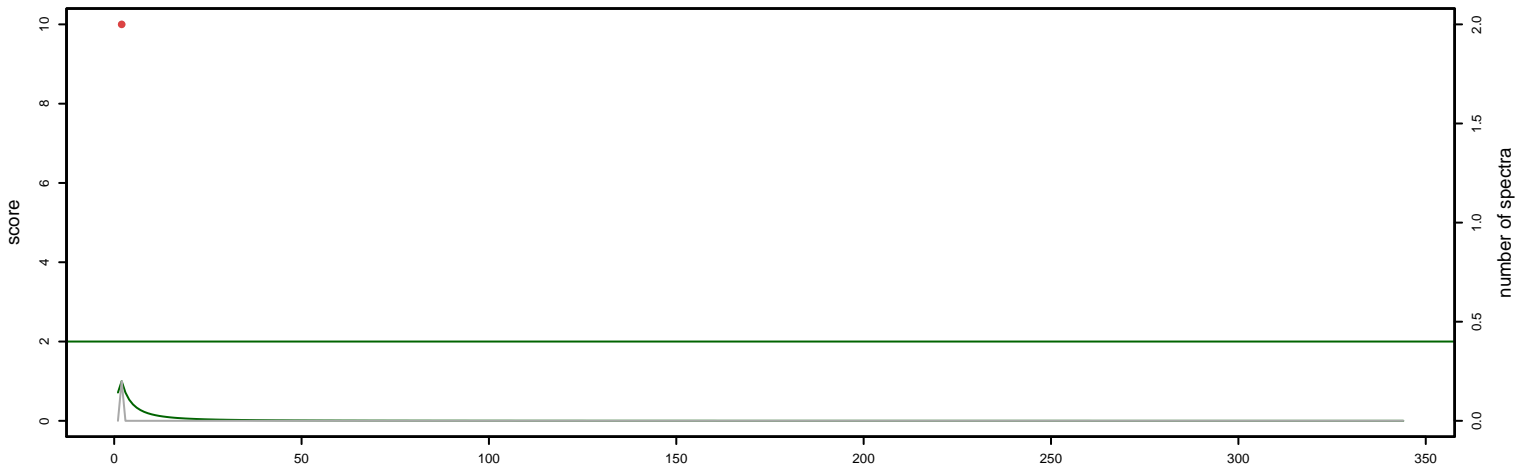

replica

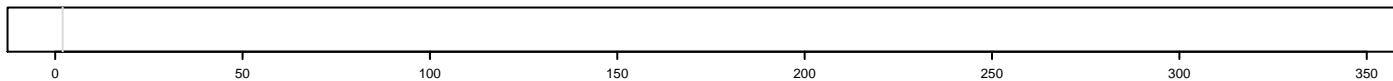

stability

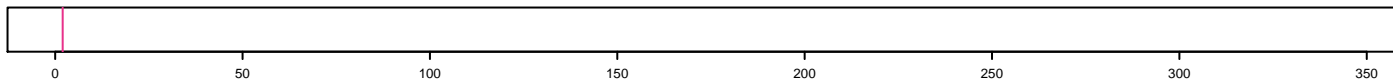

### Dynactin subunit 4 (Q9UJW0)

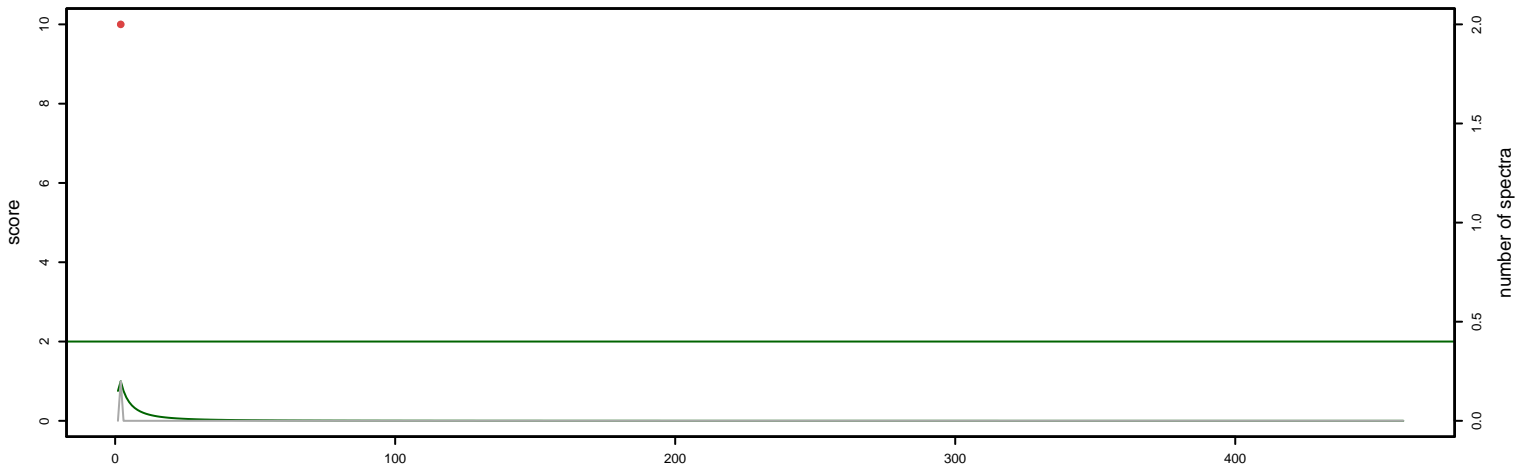

replica

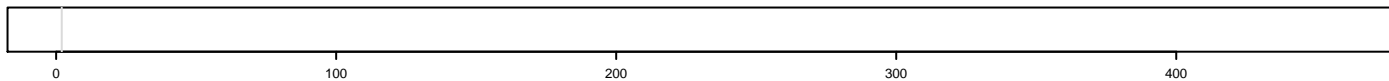

stability

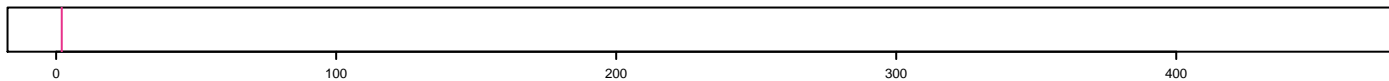

# ADP-ribosylation factor-binding protein GGA1 (Q9UJY5)

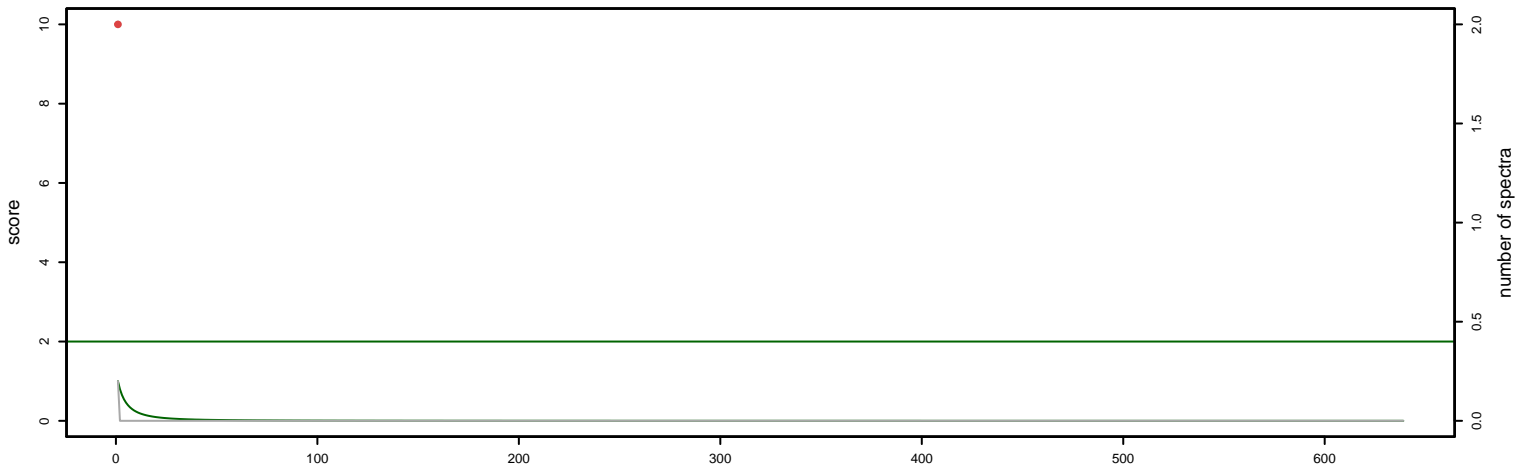

replica

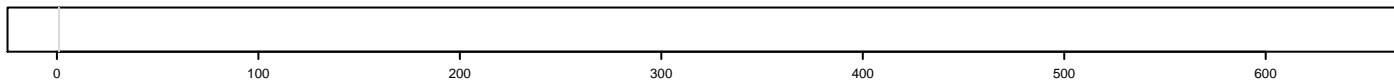

stability

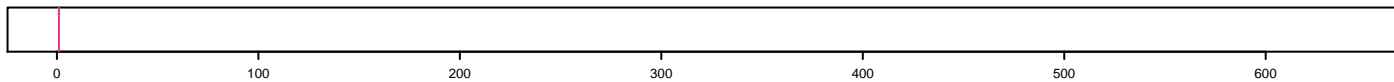

### F-box only protein 9 (Q9UK97)

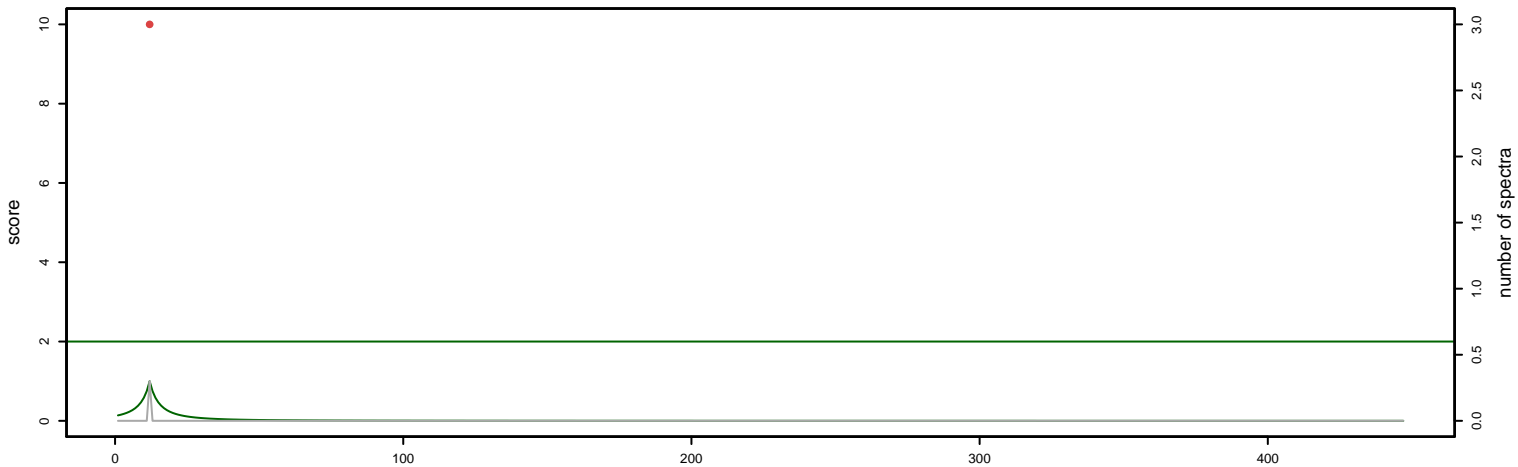

replica

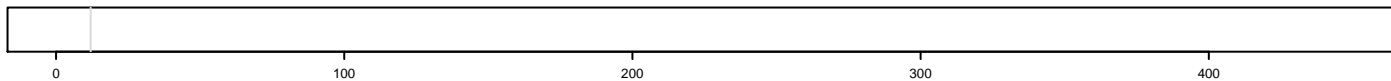

stability

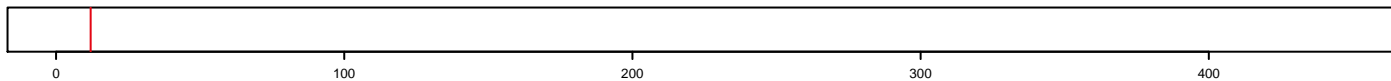



# BAG family molecular chaperone regulator 5 (Q9UL15)

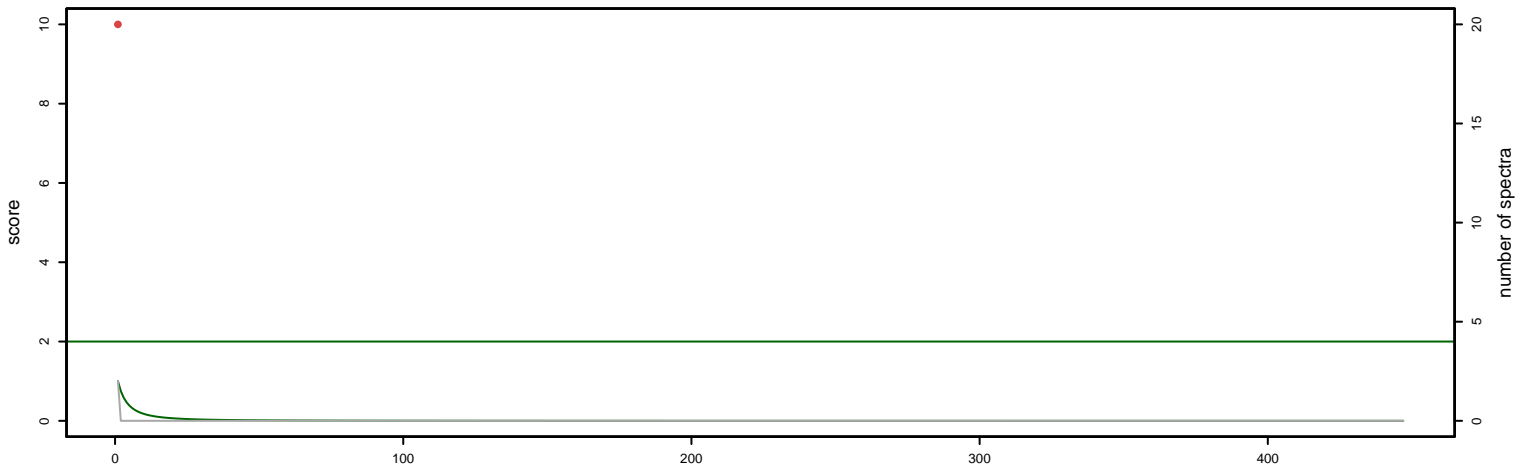

replica

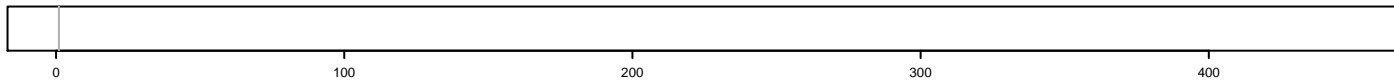

stability

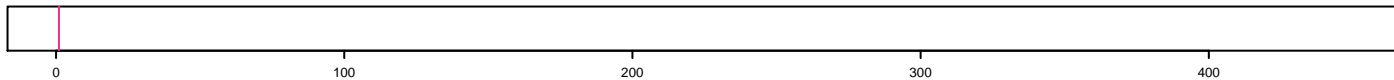

# Ras-related protein Rab-21 (Q9UL25)

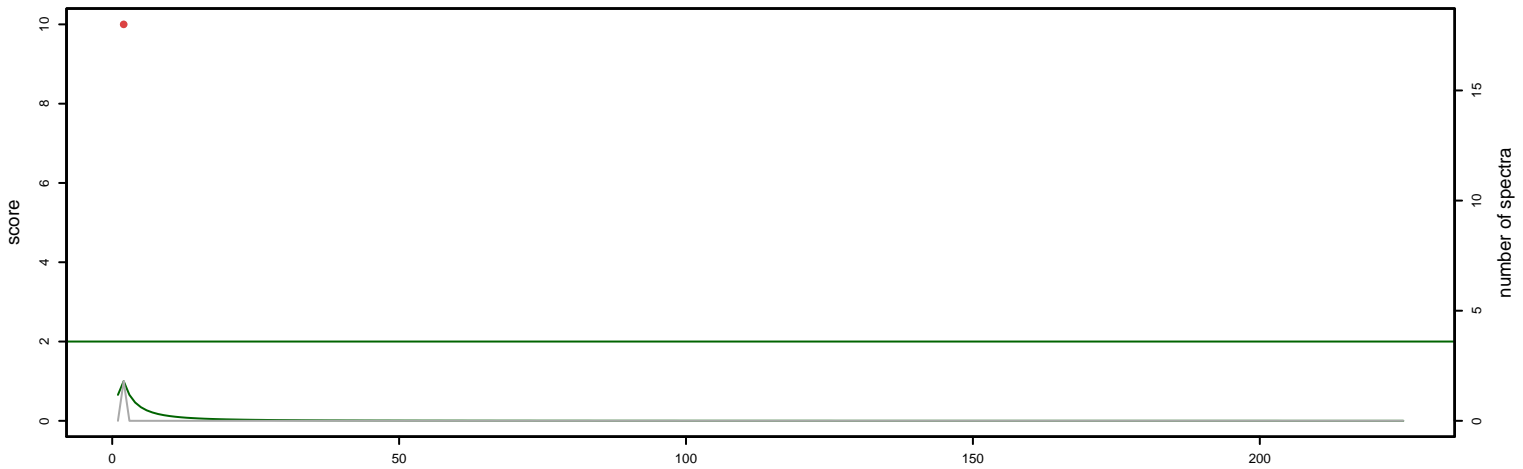

replica

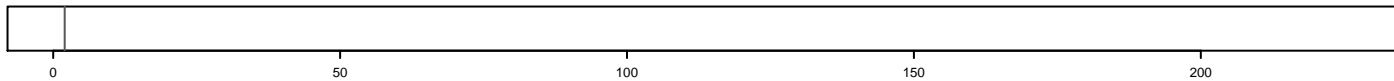

stability

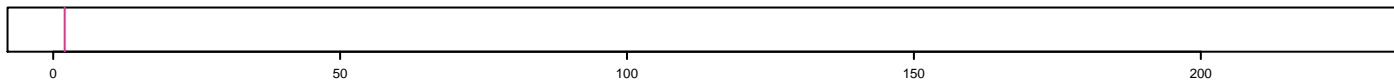

### Arf-GAP with SH3 domain, ANK repeat and PH domain-containing protein 1 (Q9ULH1)

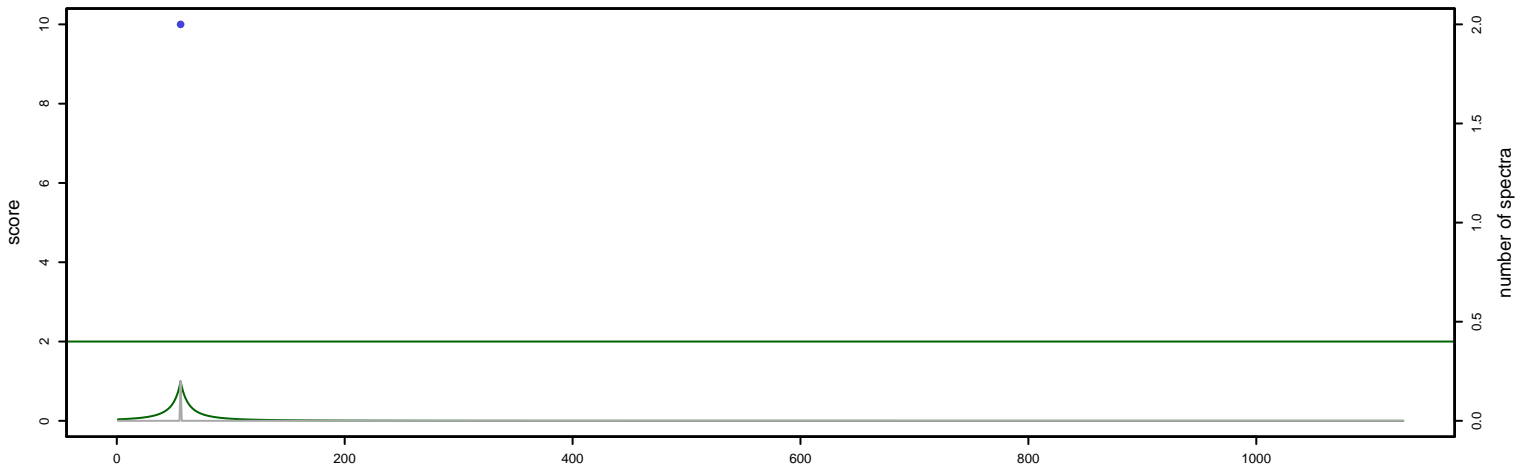

replica

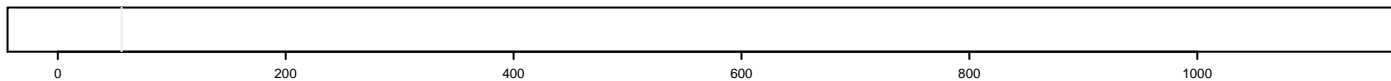

stability

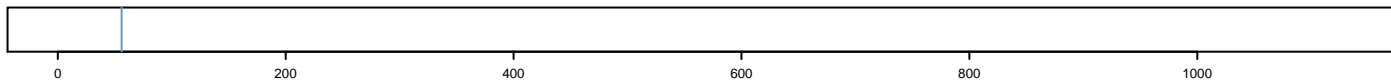

### Sorting nexin-6 (Q9UNH7)

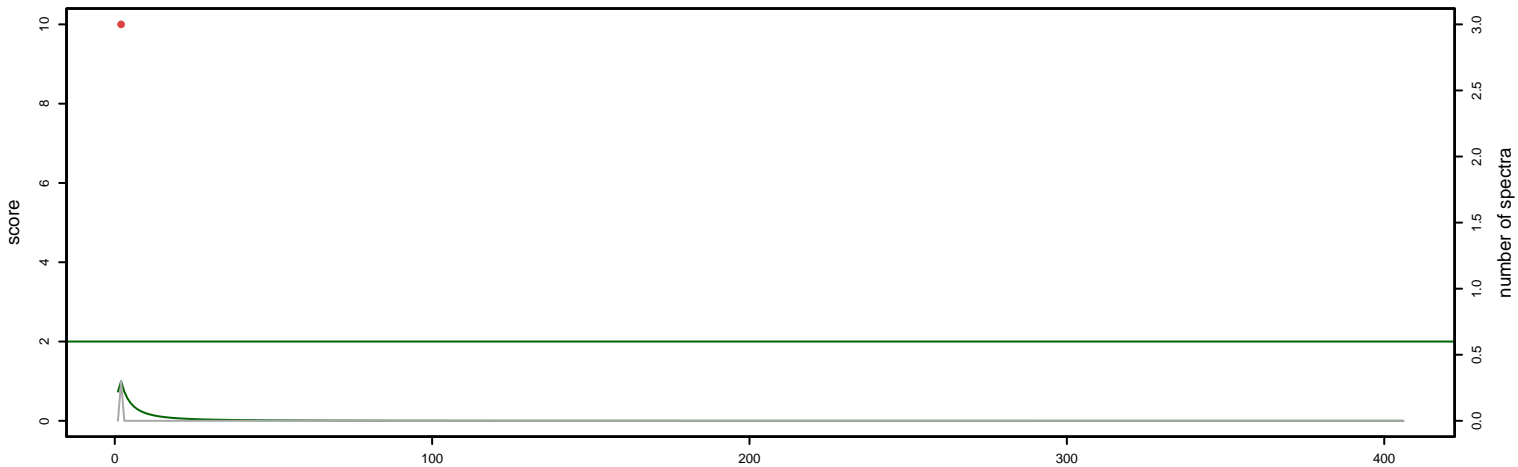

replica

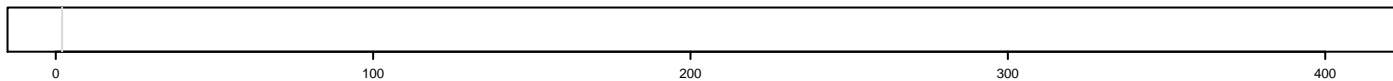

stability

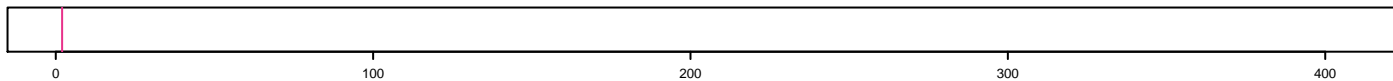

### COP9 signalosome complex subunit 3 (Q9UNS2)

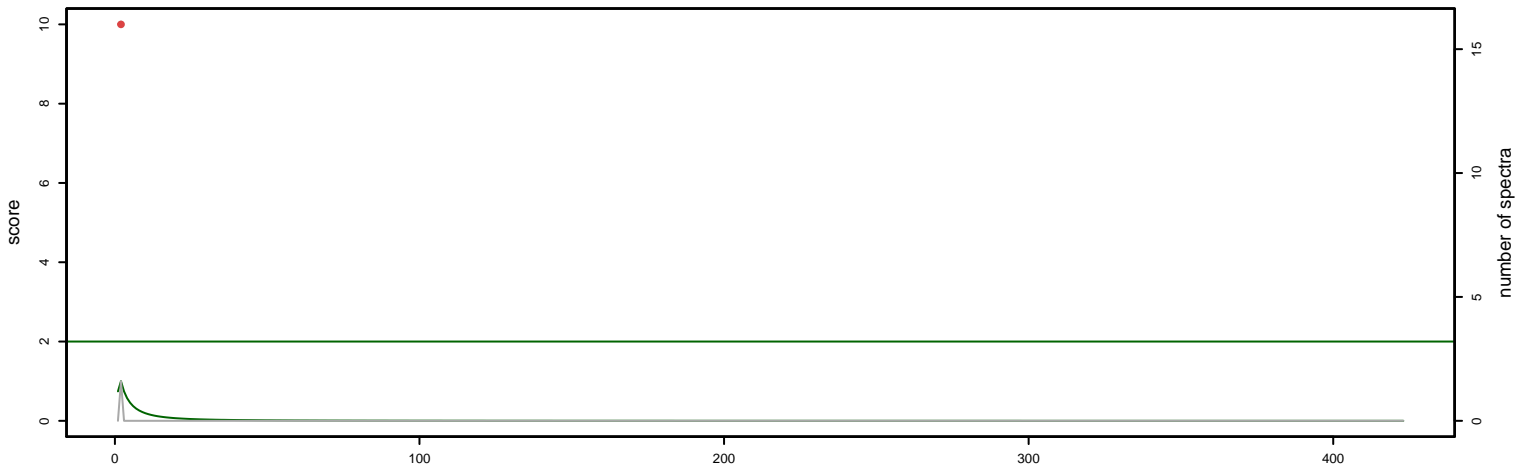

replica

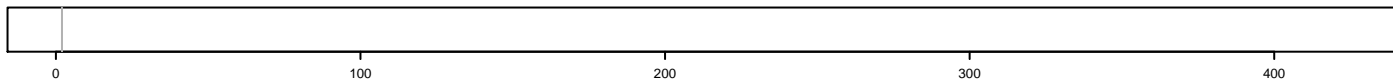

stability

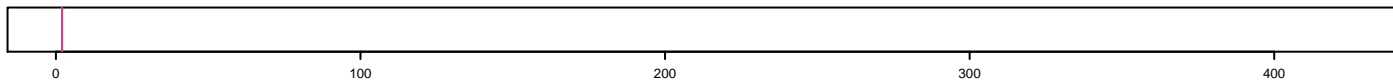

# NSFL1 cofactor p47 (Q9UNZ2)

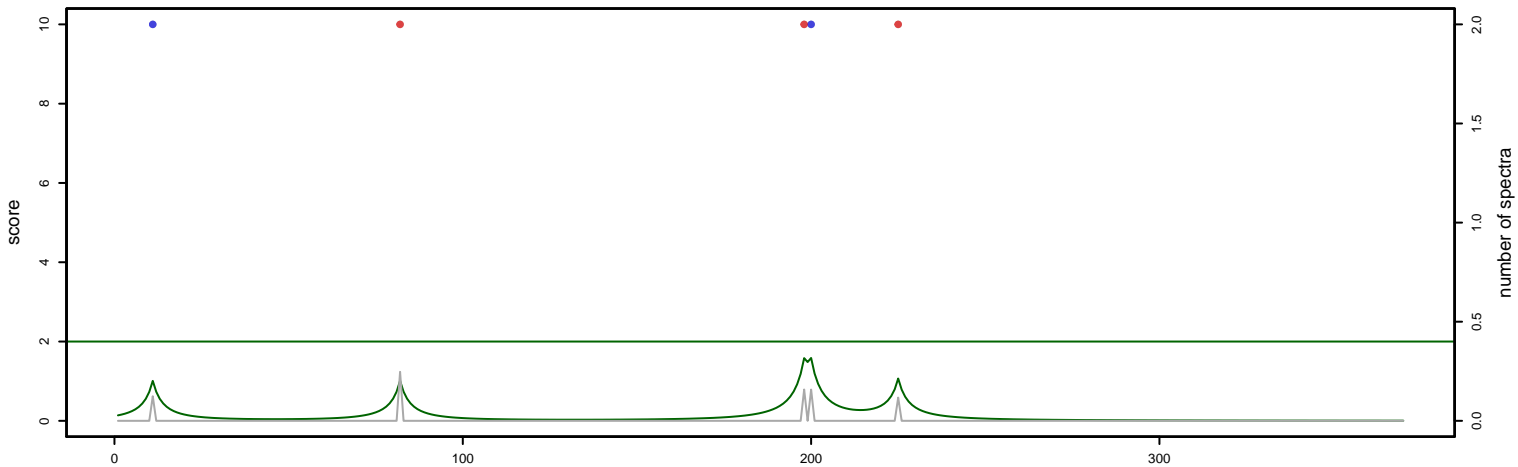

replica

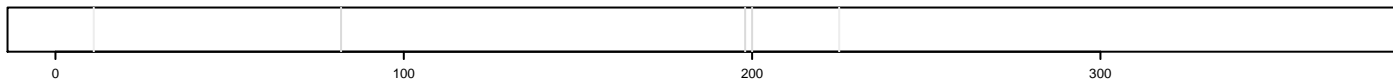

stability

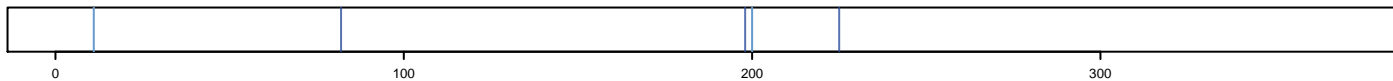

# Proliferation-associated protein 2G4 (Q9UQ80)

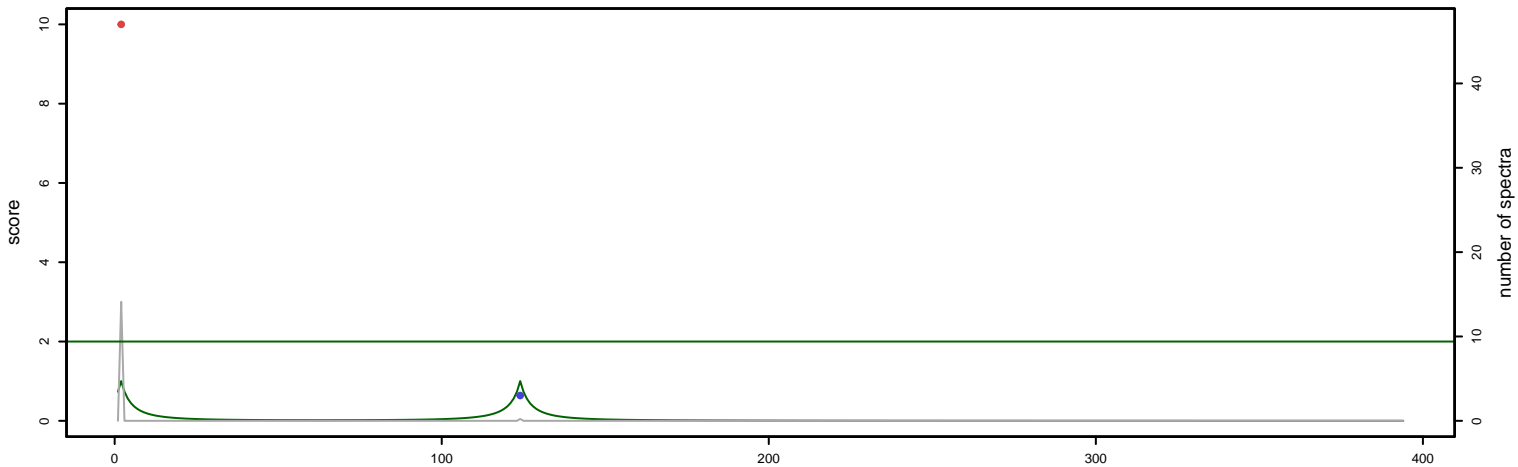

replica

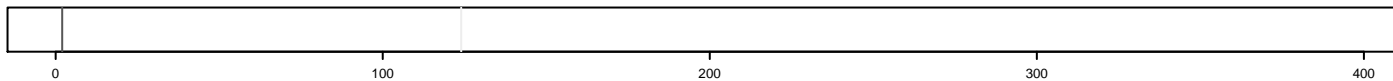

stability

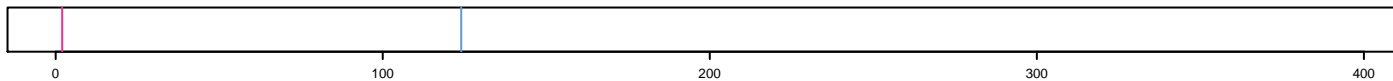

### RuvB-like 2 (Q9Y230)

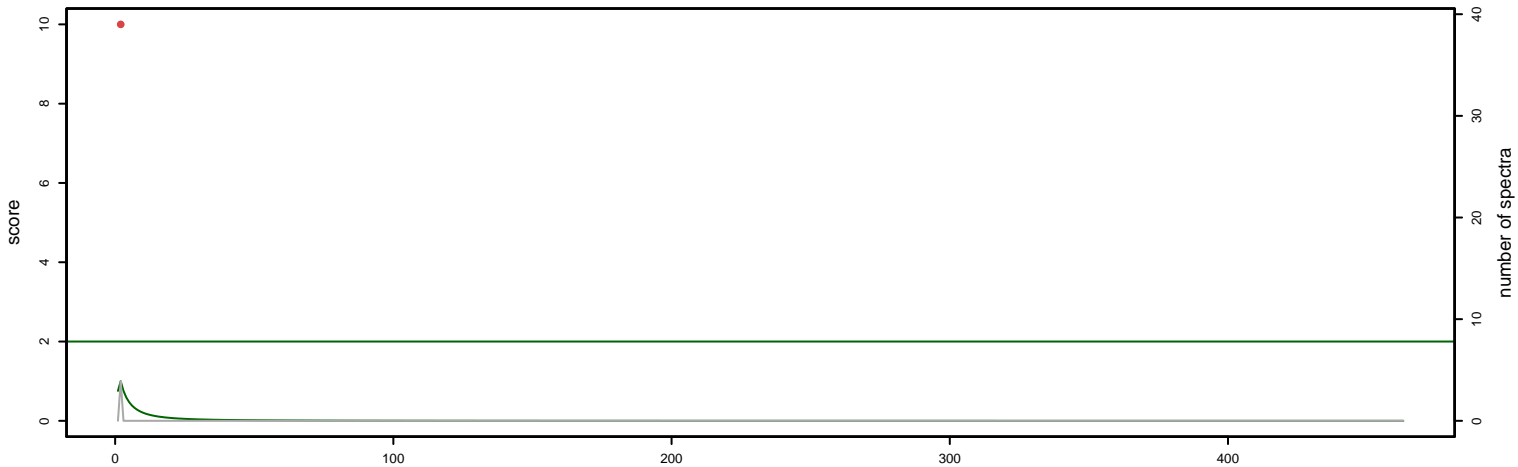

replica

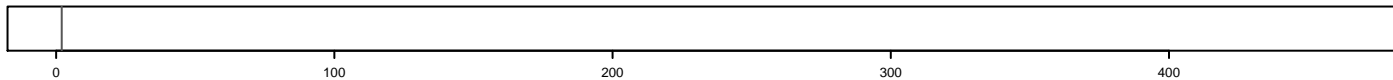

stability

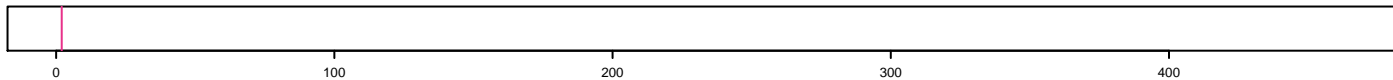



# Phenylalanine--tRNA ligase alpha subunit (Q9Y285)

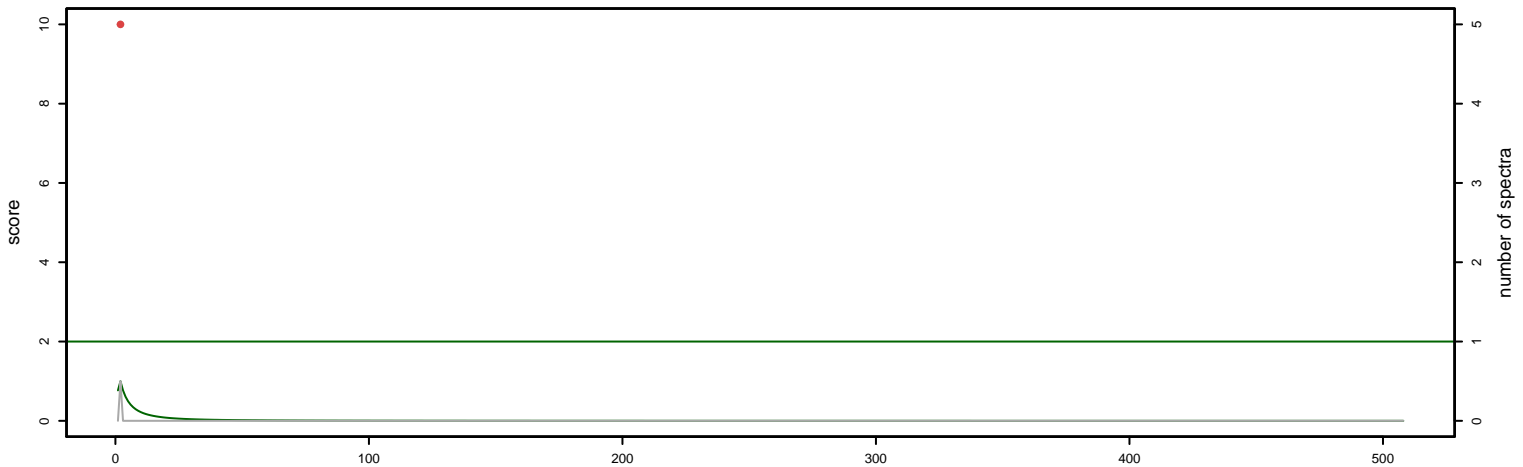

replica

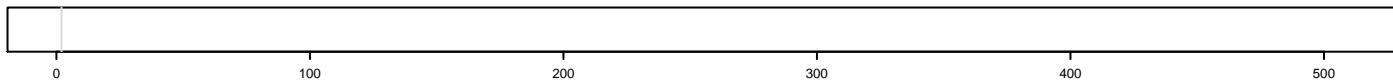

stability

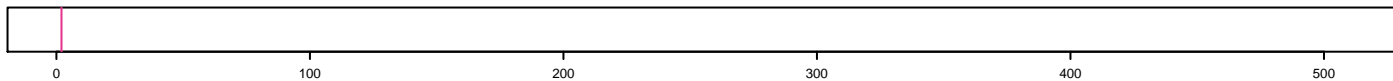

# Calcium-regulated heat stable protein 1 (Q9Y2V2)

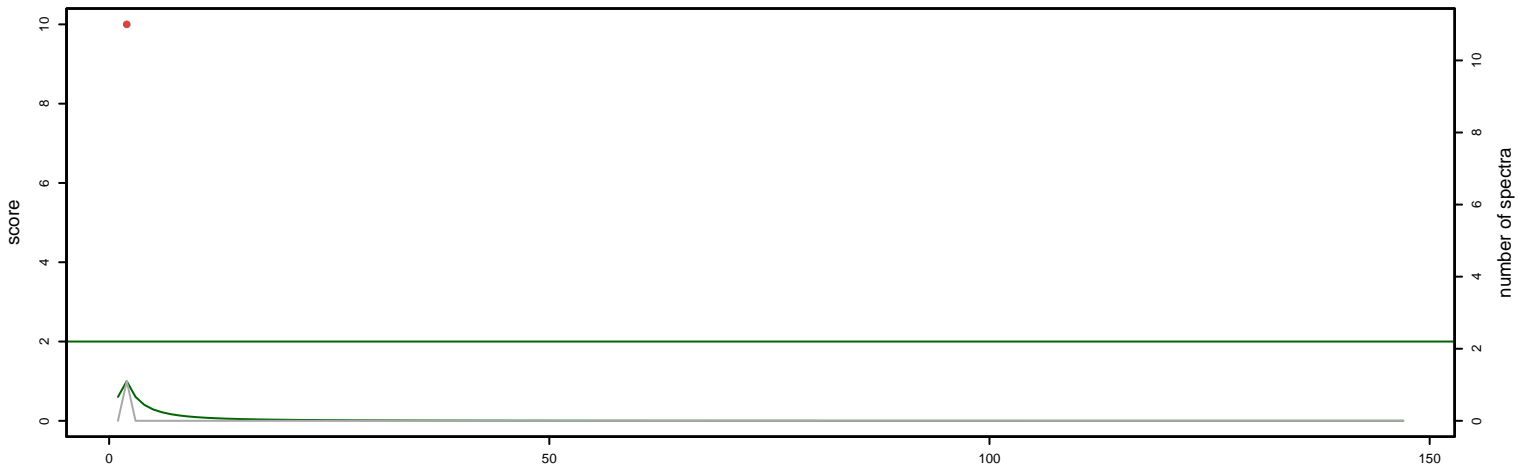

replica

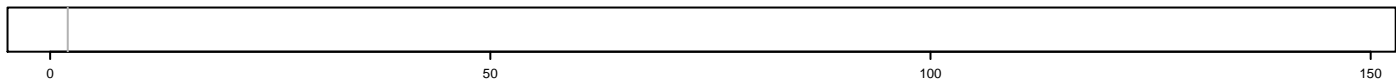

stability

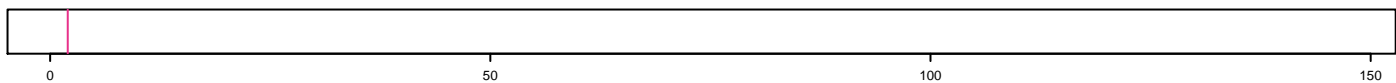

### Suppressor of G2 allele of SKP1 homolog (Q9Y2Z0)

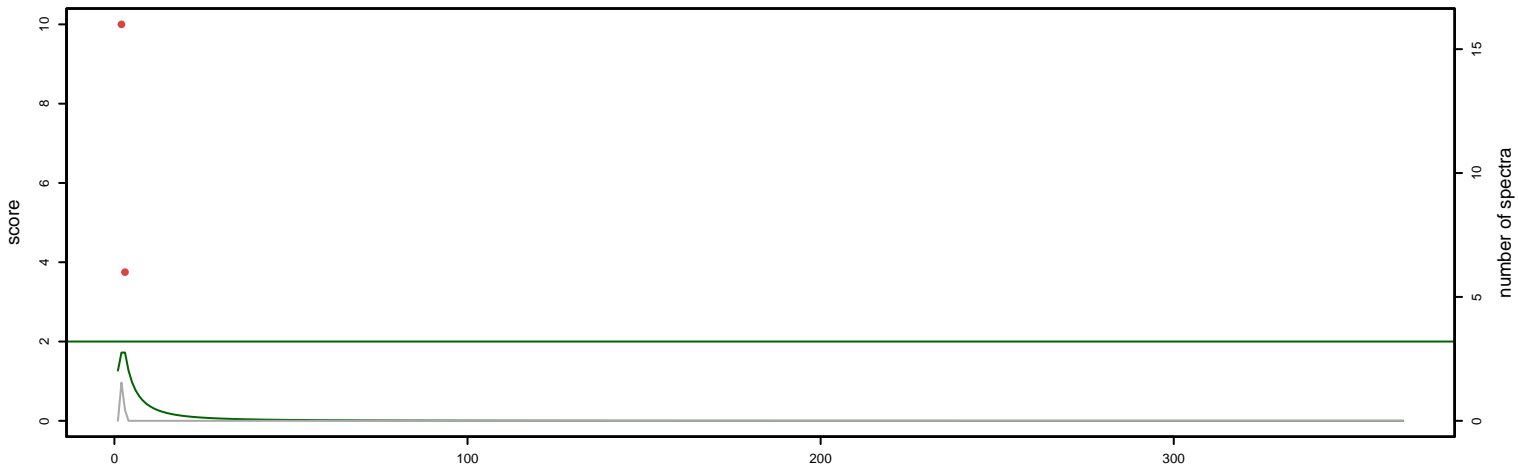

replica

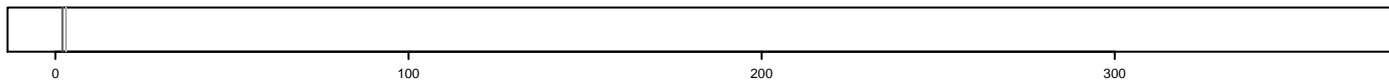

stability

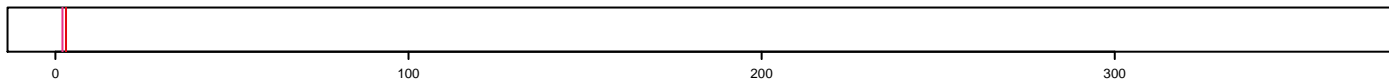

# Oligoribonuclease, mitochondrial (Q9Y3B8)

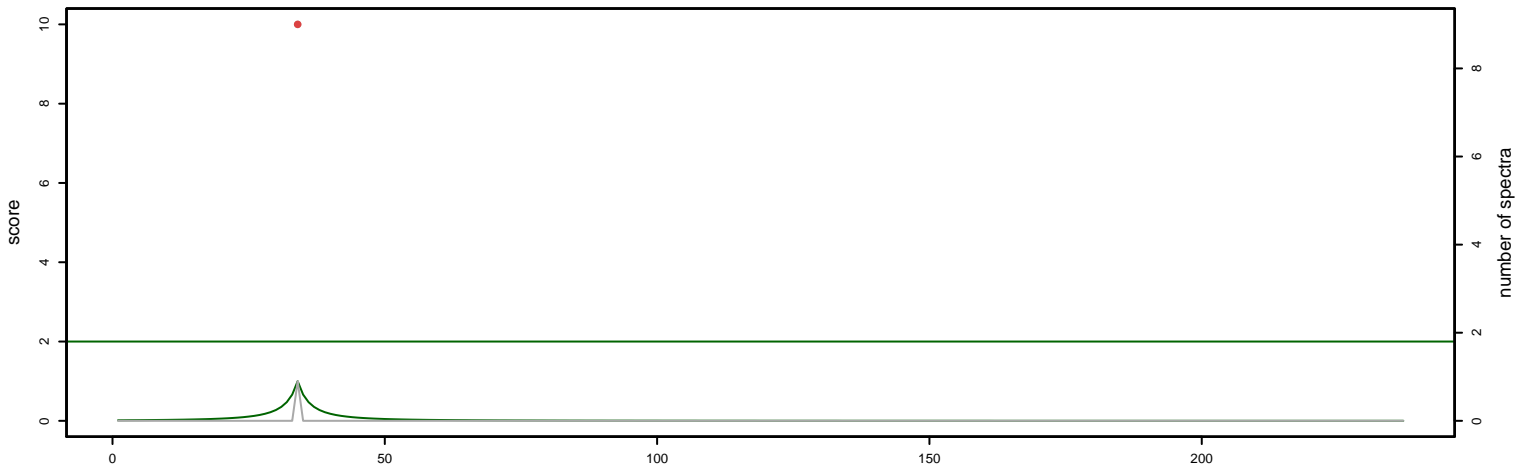

replica

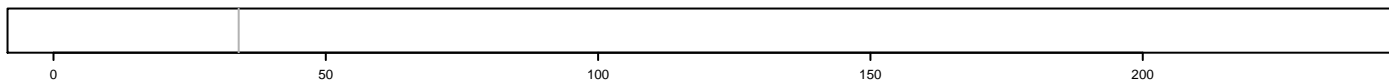

stability

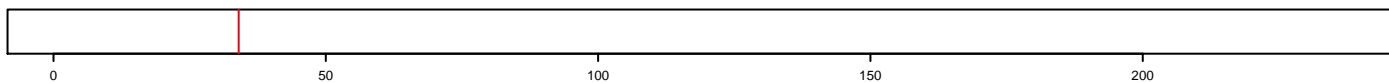

### F-box only protein 7 (Q9Y3I1-2)

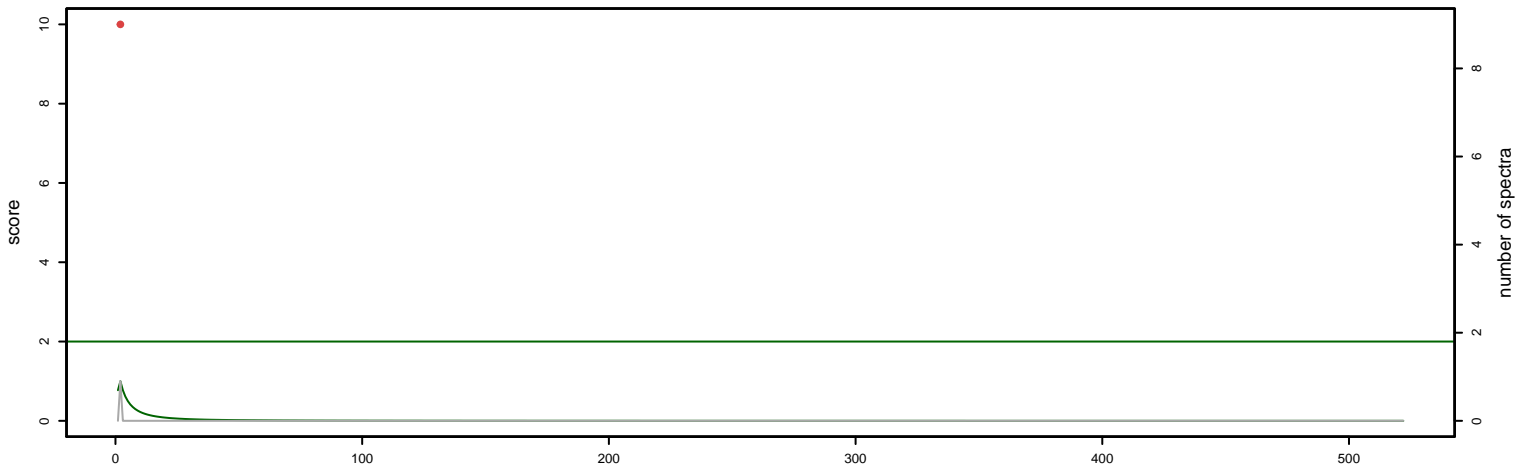

replica

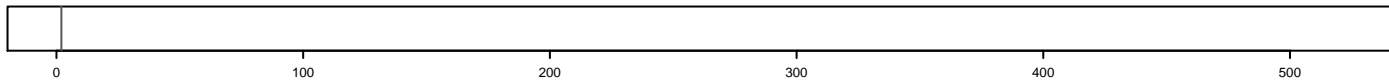

stability

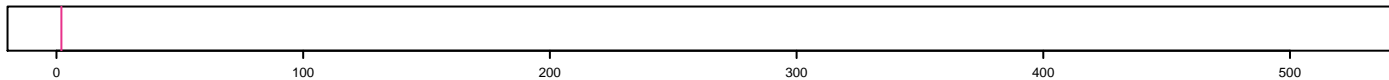

# Ubiquitin carboxyl-terminal hydrolase 15 (Q9Y4E8)

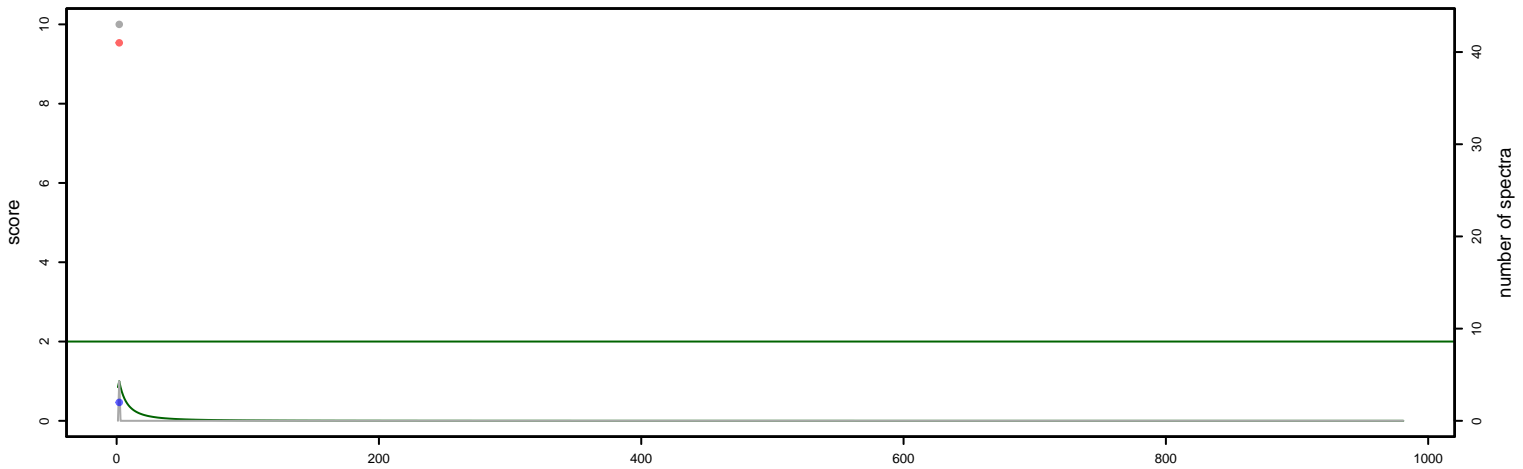

replica

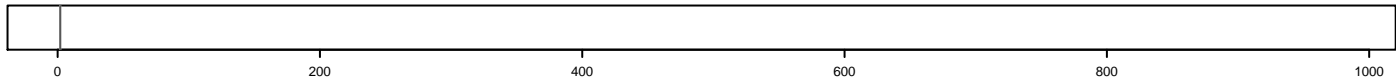

stability

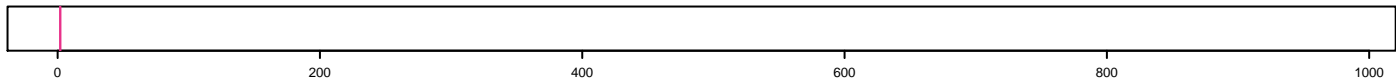

### Cysteine protease ATG4B (Q9Y4P1)

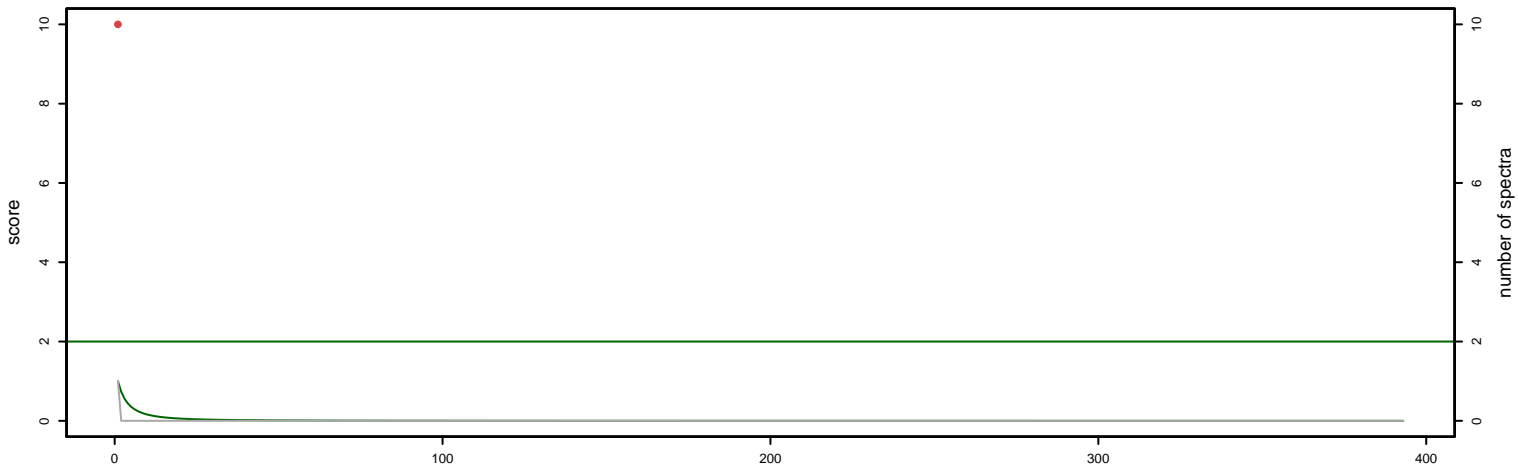

replica

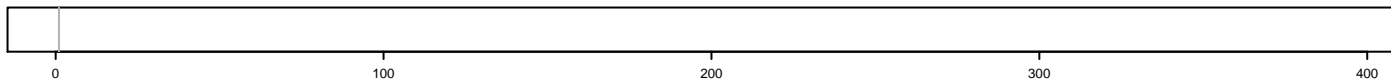

stability

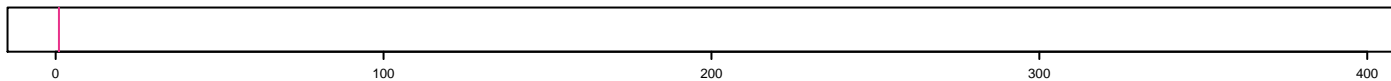

# WD repeat domain phosphoinositide-interacting protein 2 (Q9Y4P8)

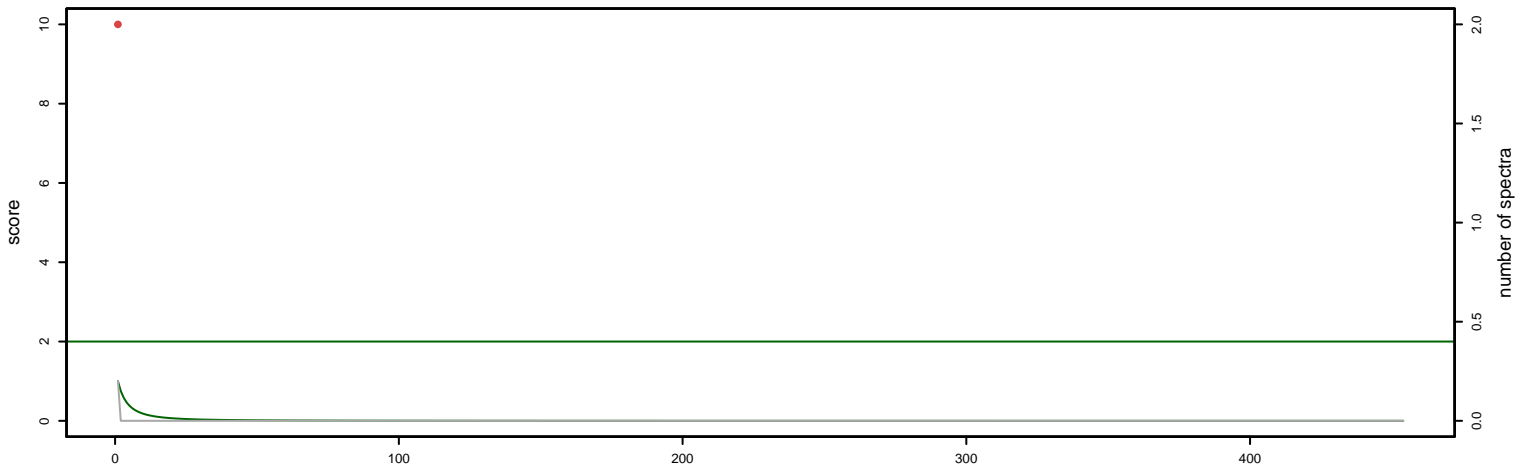

replica

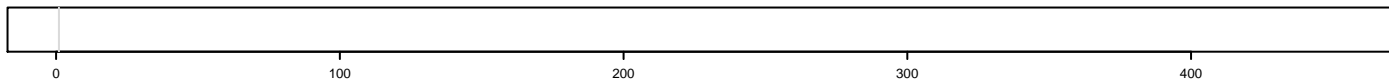

stability

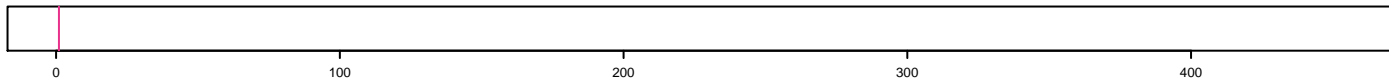



# O-acetyl-ADP-ribose deacetylase 1 (Q9Y530)

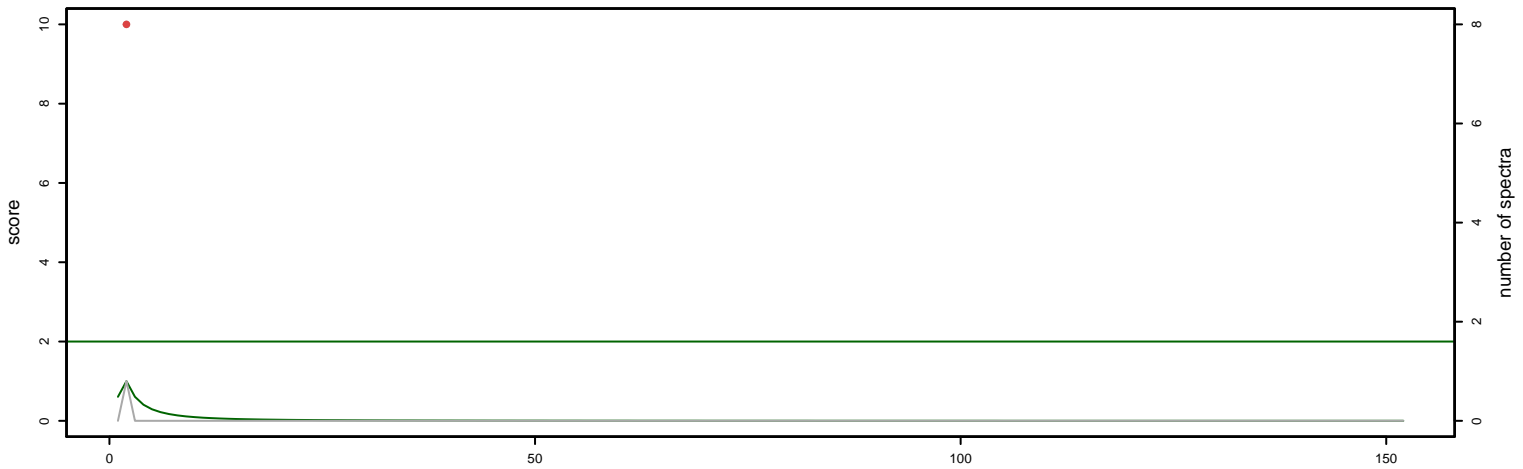

replica

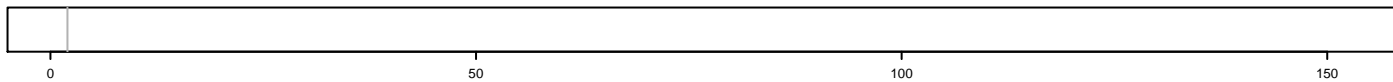

stability

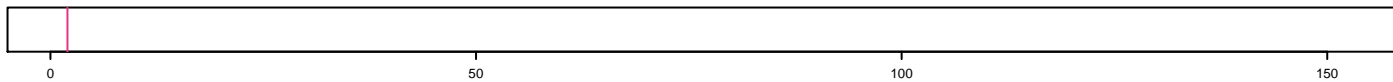

# Protein phosphatase methylesterase 1 (Q9Y570)

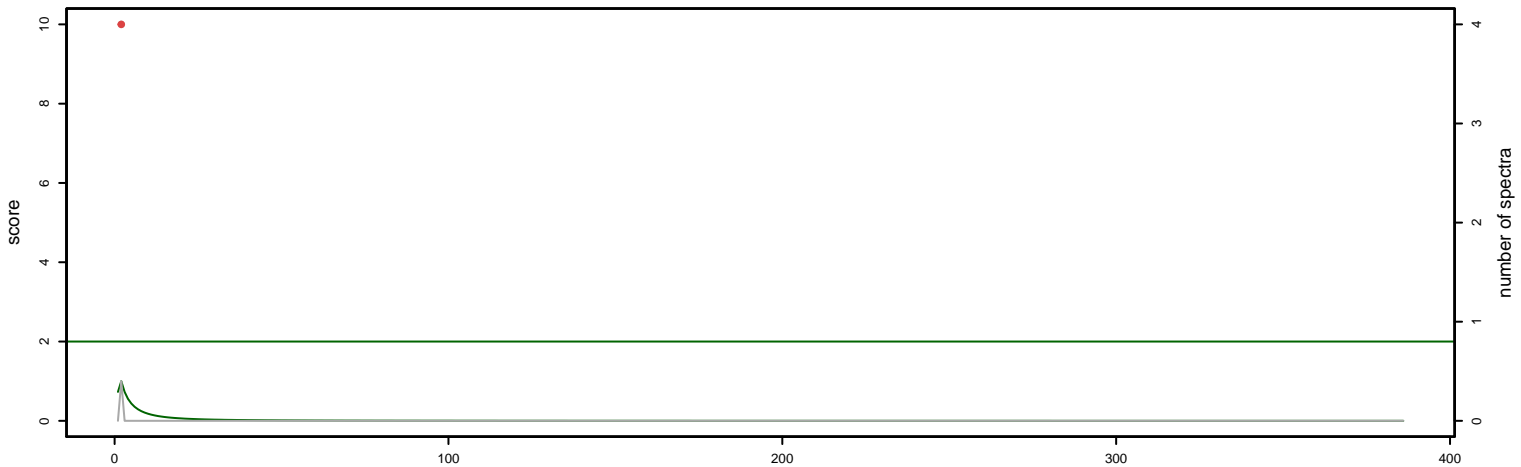

replica

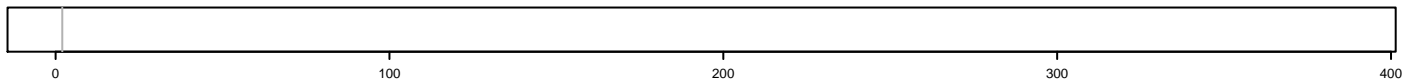

stability

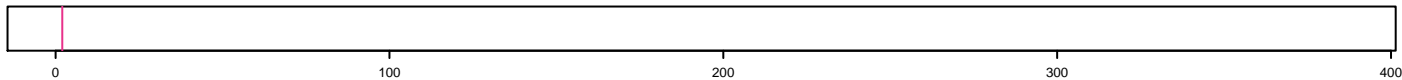

### Sorting nexin-5 (Q9Y5X3)

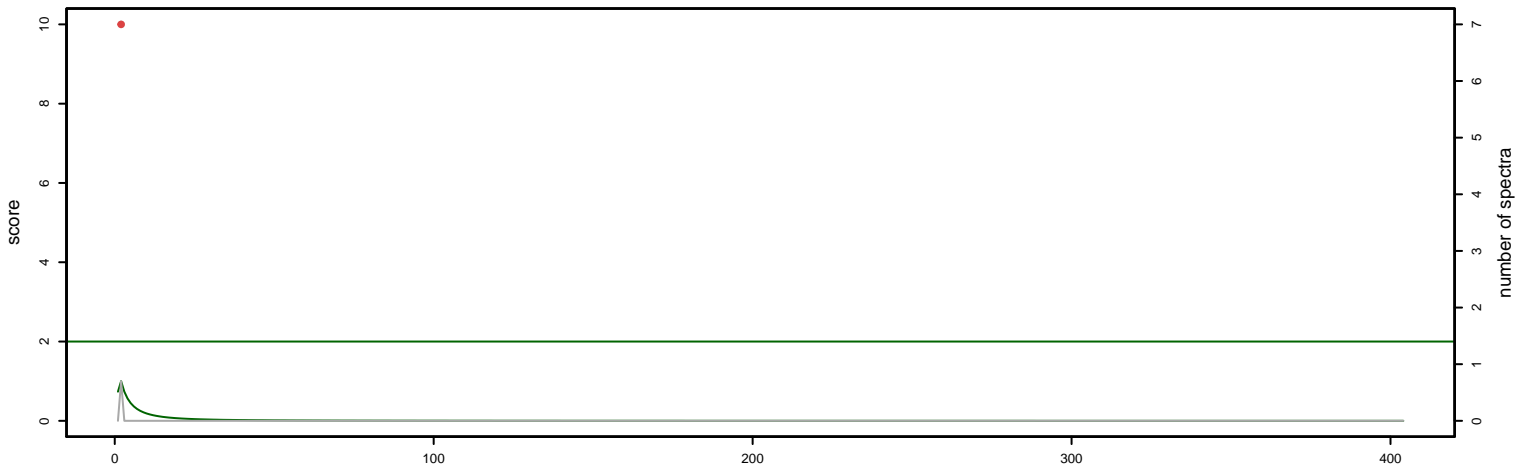

replica

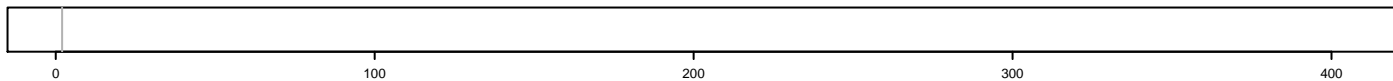

stability

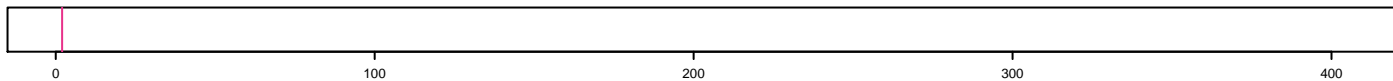

### Cytosolic Fe-S cluster assembly factor NUBP2 (Q9Y5Y2)

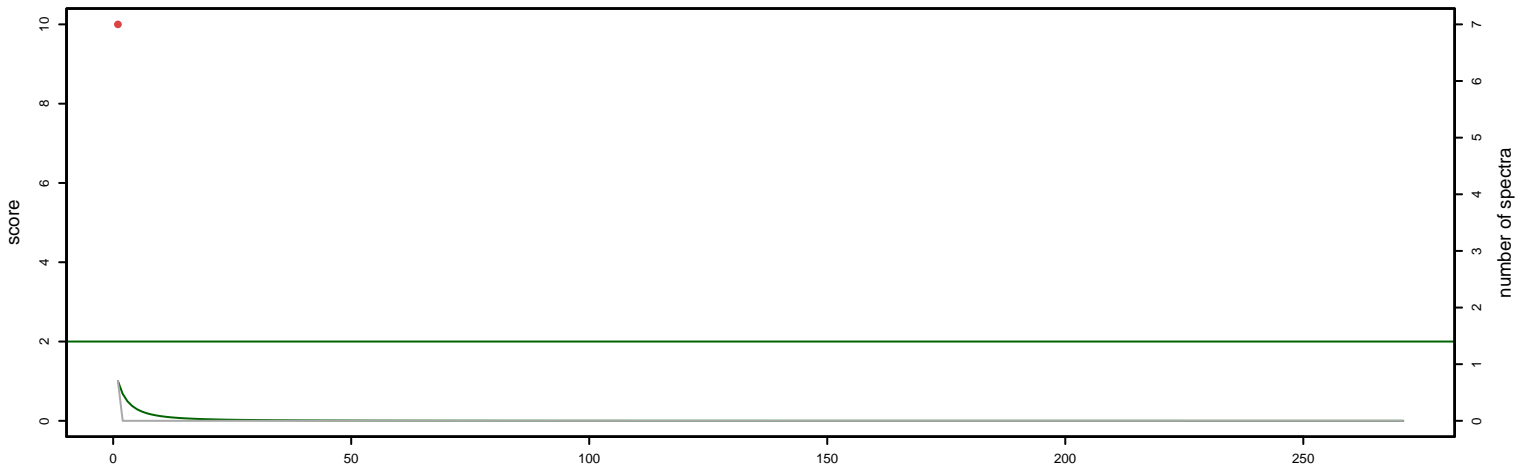

replica

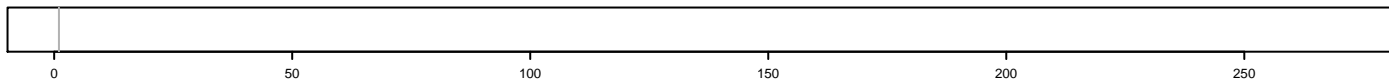

stability

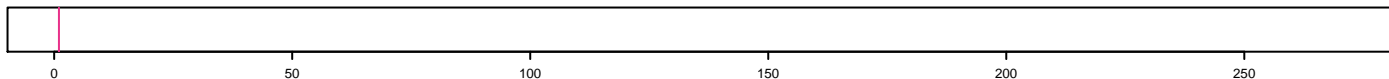

# Junctional adhesion molecule A (Q9Y624)

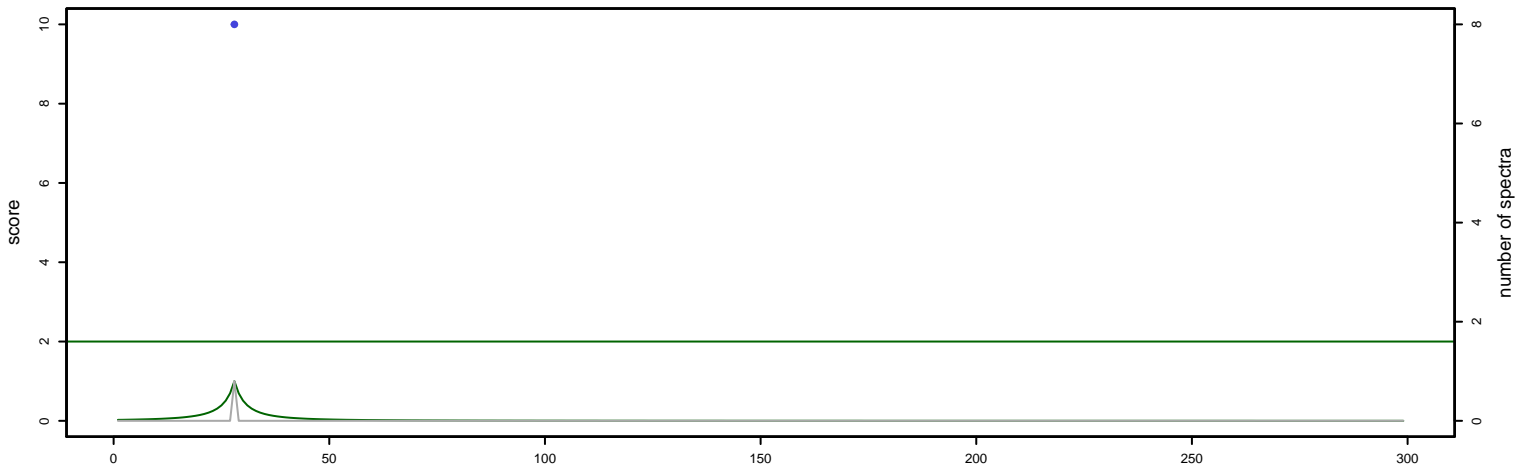

replica

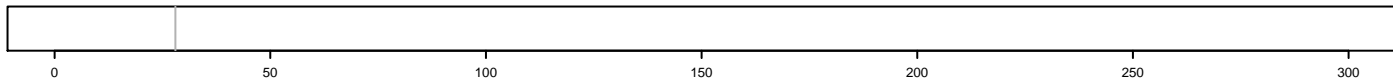

stability

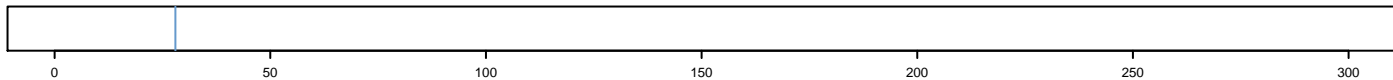

Supplement: pr401191w_si_003.pdf [file pr401191w_si_003.pdf]
