# Supplementary material
Source: PubMed Central journal article supplement (PMC3979129)
Supplement: pr401191w_si_002.pdf [file pr401191w_si_002.pdf]

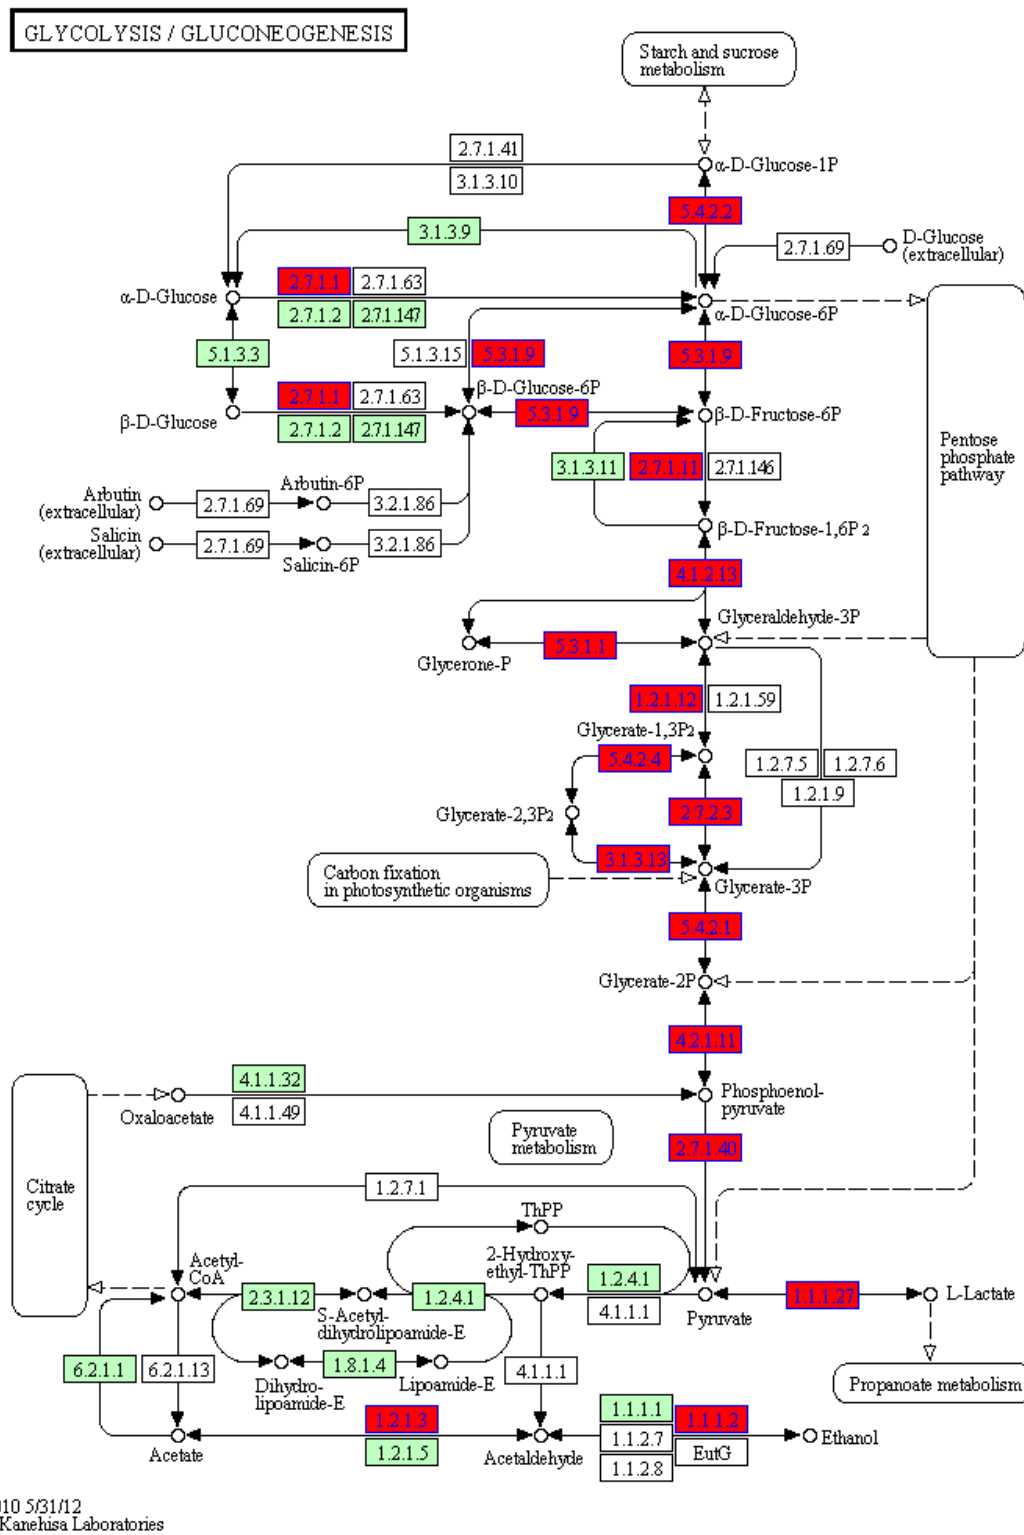

**Supplementary Figure S1. Glycolysis pathway.** Proteins identified in human erythrocytes are mapped onto pathway as derived from KEGG and highlighted in red.

N $\alpha$  termini and N-acetylation status differentiate stable cleaved protein species from degradation remnants in the human erythrocyte proteome

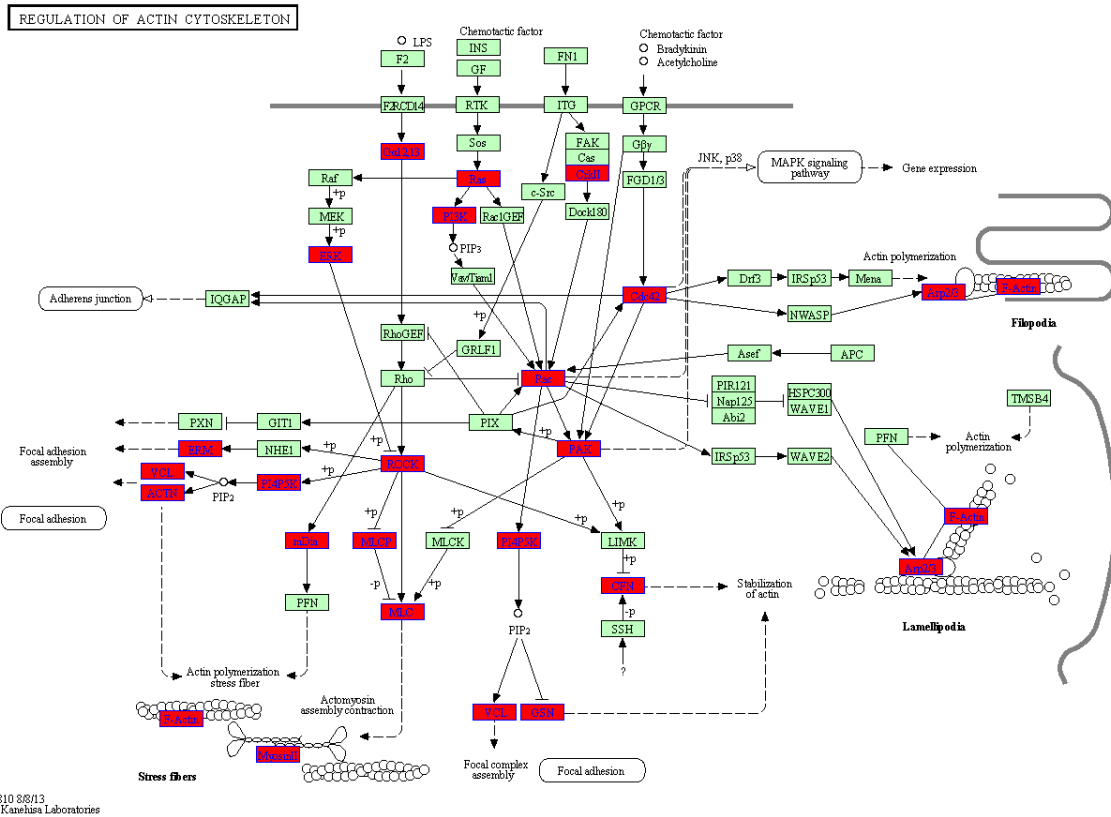

**Supplementary Figure S2. Regulation of the action cytoskeleton.** Proteins identified in human erythrocytes are mapped onto pathway as derived from KEGG and highlighted in red.

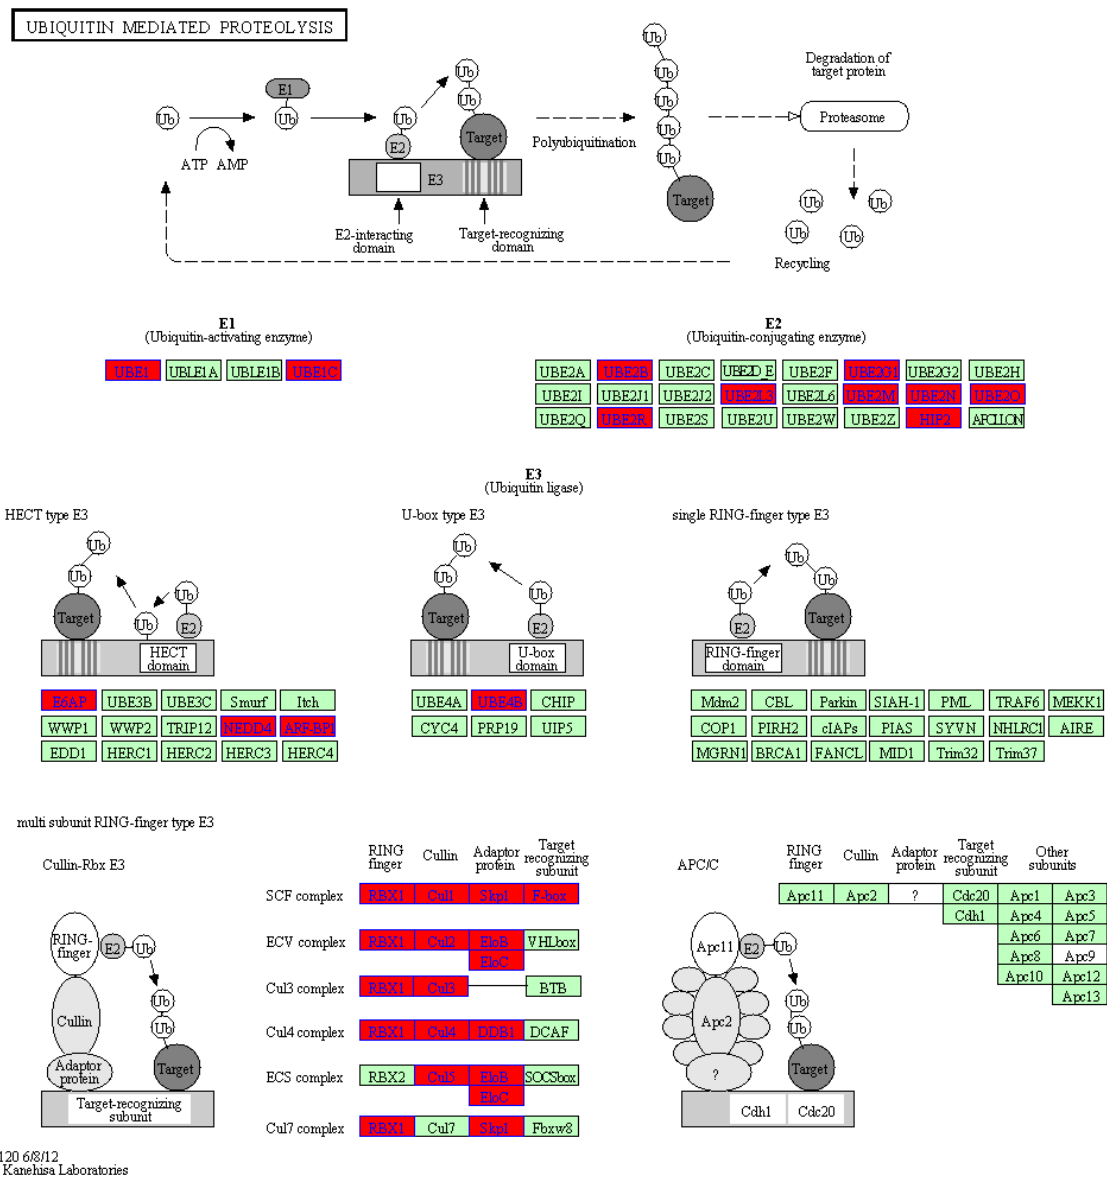

**Supplementary Figure S3. Ubiquitin mediated proteolysis.** Proteins identified in human erythrocytes are mapped onto the pathway as derived from KEGG and highlighted in red.

N $\alpha$  termini and N-acetylation status differentiate stable cleaved protein species from degradation remnants in the human erythrocyte proteome

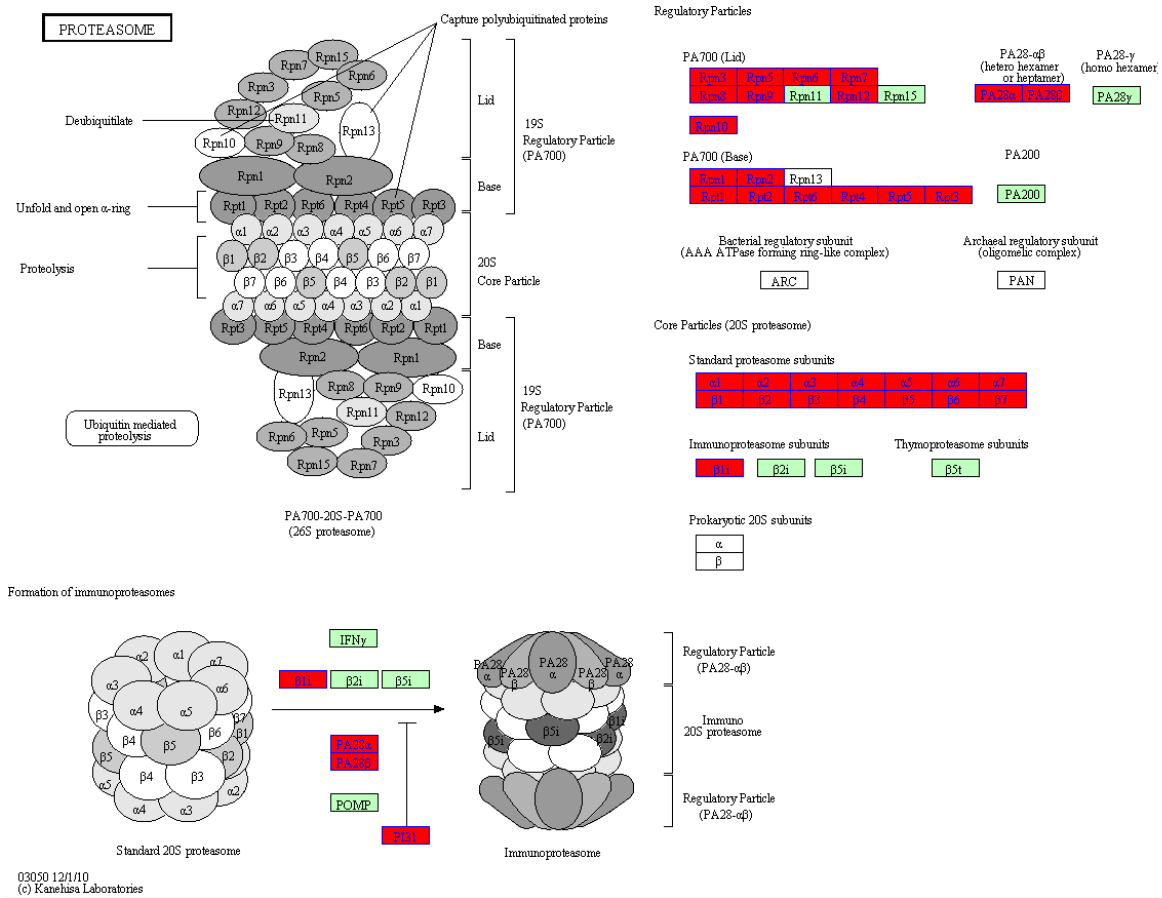

**Supplementary Figure S4. The proteasome.** Proteins identified in human erythrocytes are mapped onto the complex as derived from KEGG and highlighted in red.

N $\alpha$  termini and N-acetylation status differentiate stable cleaved protein species from degradation remnants in the human erythrocyte proteome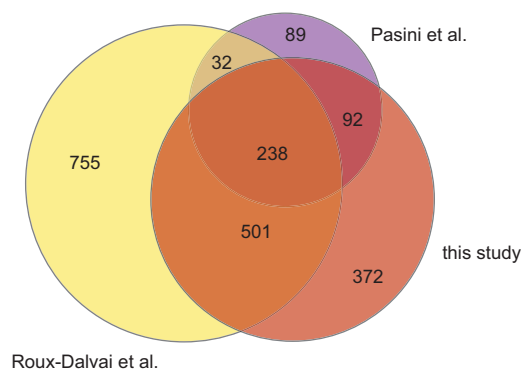

**Supplementary Figure S5. Comparison between erythrocyte proteome studies.** Overlap between proteins identified in three independent high throughput studies of the erythrocyte proteome. Pasini et al. (9) used shotgun analyses; Roux-Dalvai et al. used the ProteoMiner approach (13). All reported protein identifiers were mapped to their respective gene name for maximum consistency.

N $\alpha$  termini and N-acetylation status differentiate stable cleaved protein species from degradation remnants in the human erythrocyte proteome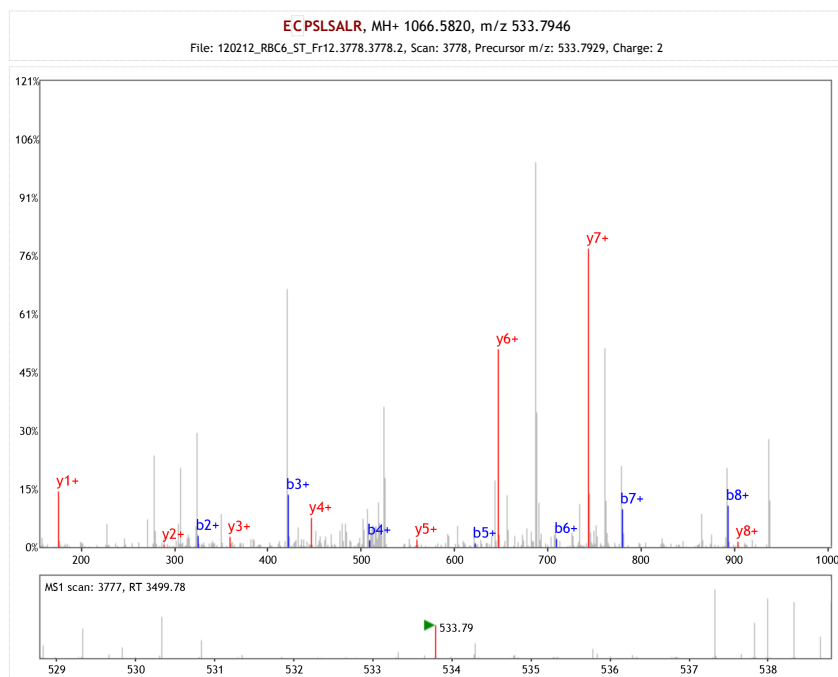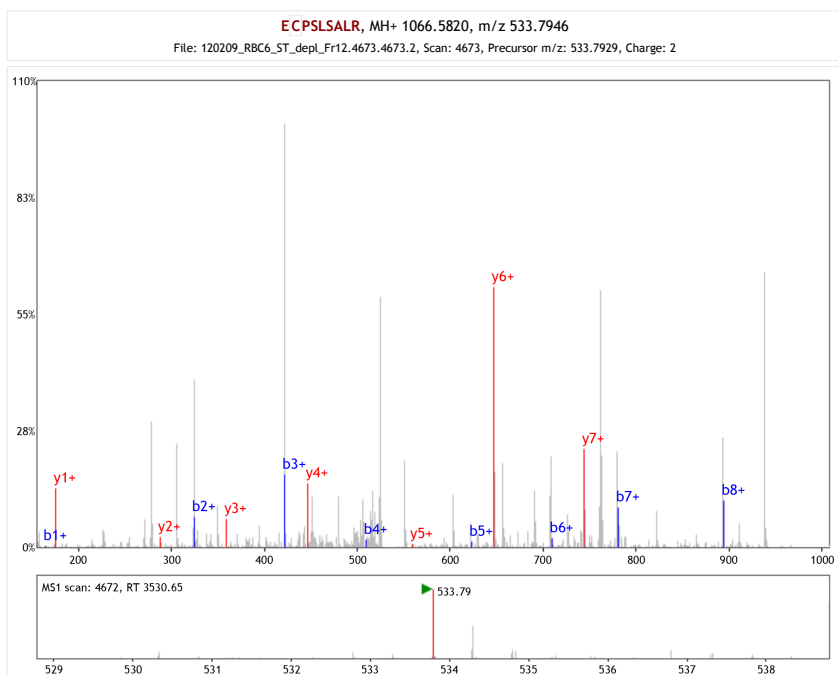

**Supplementary Figure S6. Evidence for missing protein cancer/testis antigen 75 (Q6PK30).** Representative spectra out of a total of 17 spectra supporting the peptide sequence ECPSLSALR.

N $\alpha$  termini and N-acetylation status differentiate stable cleaved protein species from degradation remnants in the human erythrocyte proteome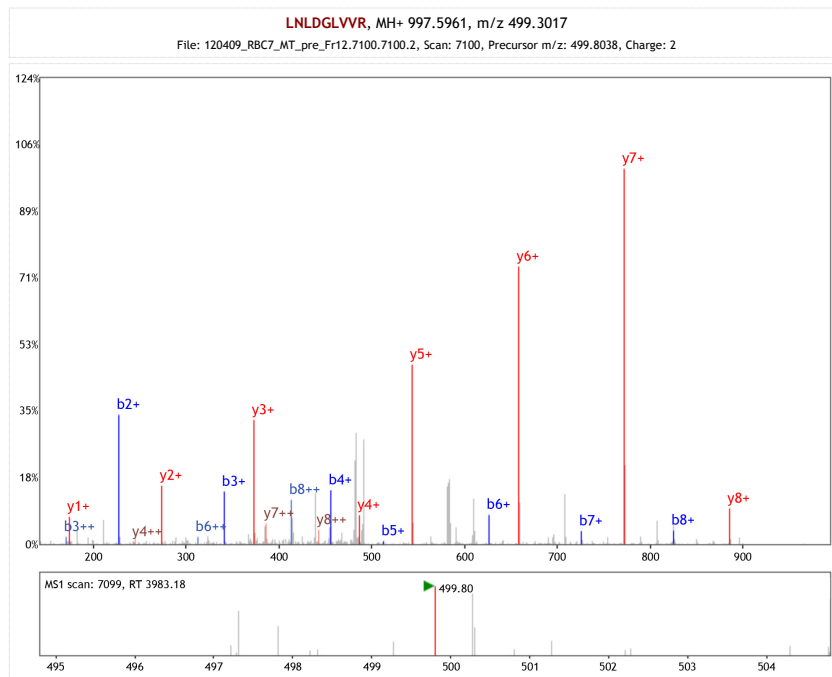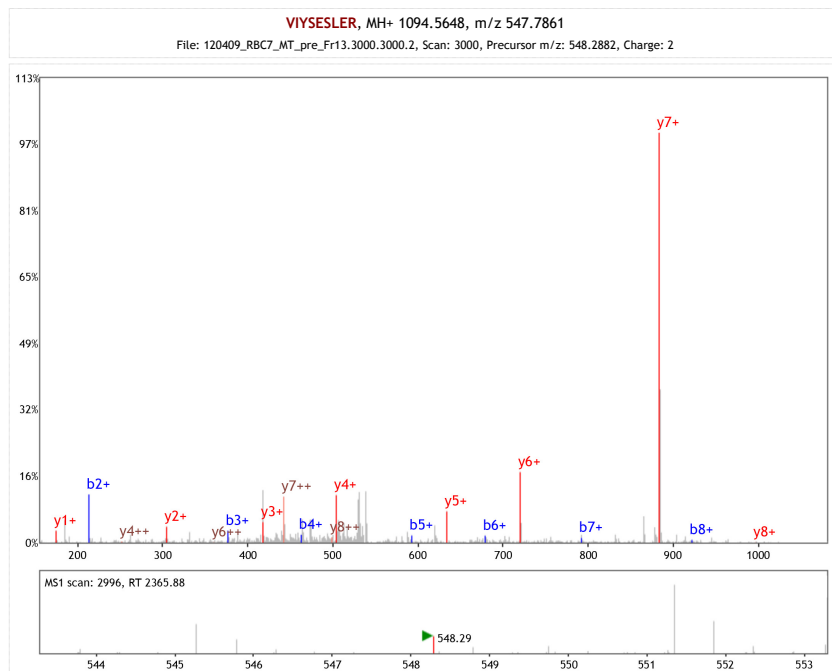

**Supplementary Figure S7. Evidence for missing protein intercellular adhesion molecule 4 (Q14773).** Representative spectra out of a total of ten spectra supporting peptide sequences LNL DGLVVR and VIYSESLER.

N $\alpha$  termini and N-acetylation status differentiate stable cleaved protein species from degradation remnants in the human erythrocyte proteome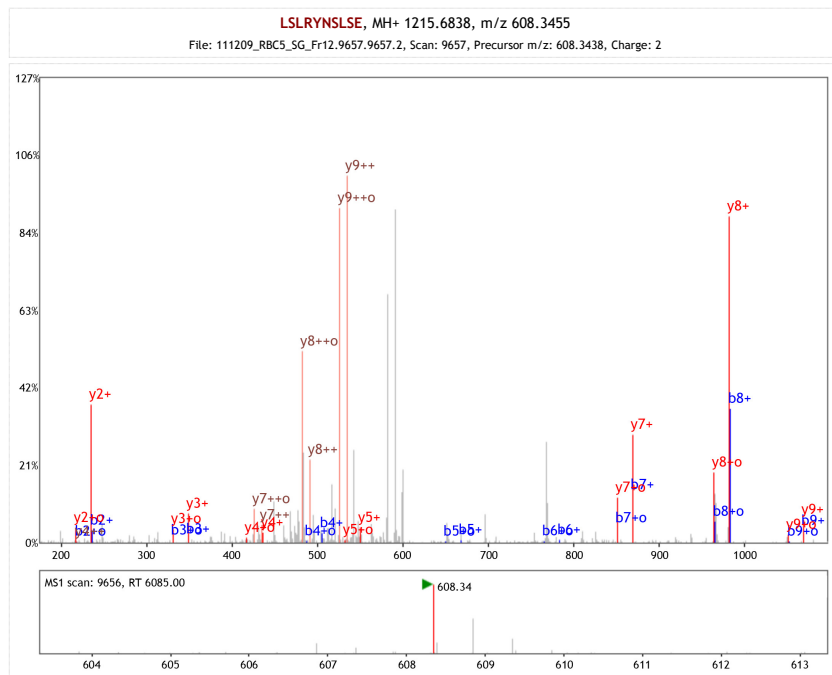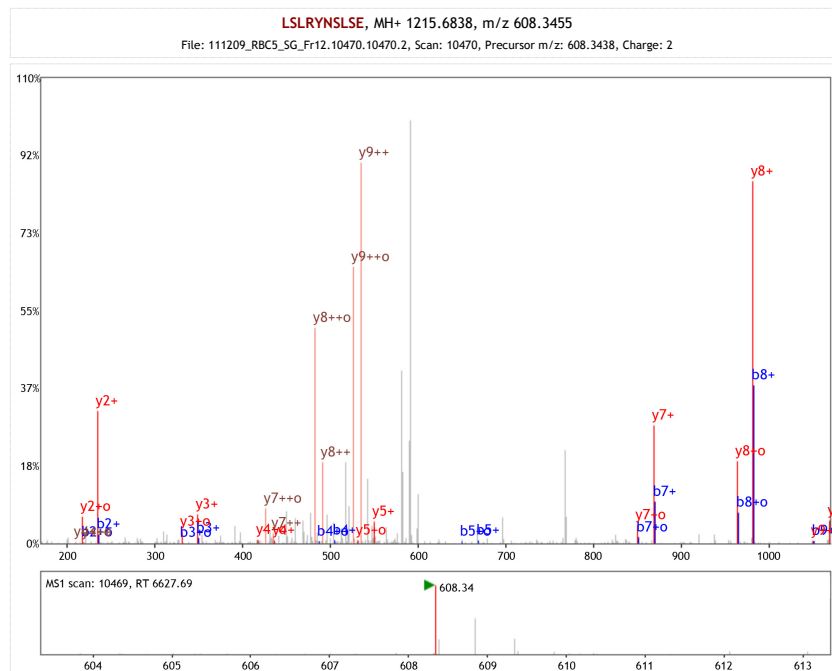

**Supplementary Figure S8. Evidence for missing protein leucine-rich repeat transmembrane neuronal protein 1 (Q86UE6).** Representative spectra out of a total of 87 spectra supporting peptide sequence LSLRYNSLE.



N $\alpha$  termini and N-acetylation status differentiate stable cleaved protein species from degradation remnants in the human erythrocyte proteome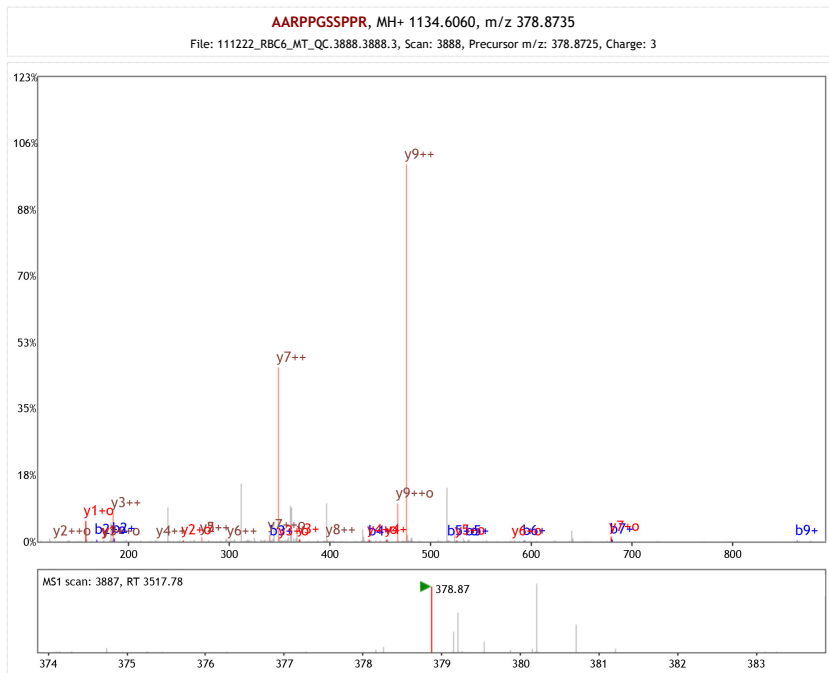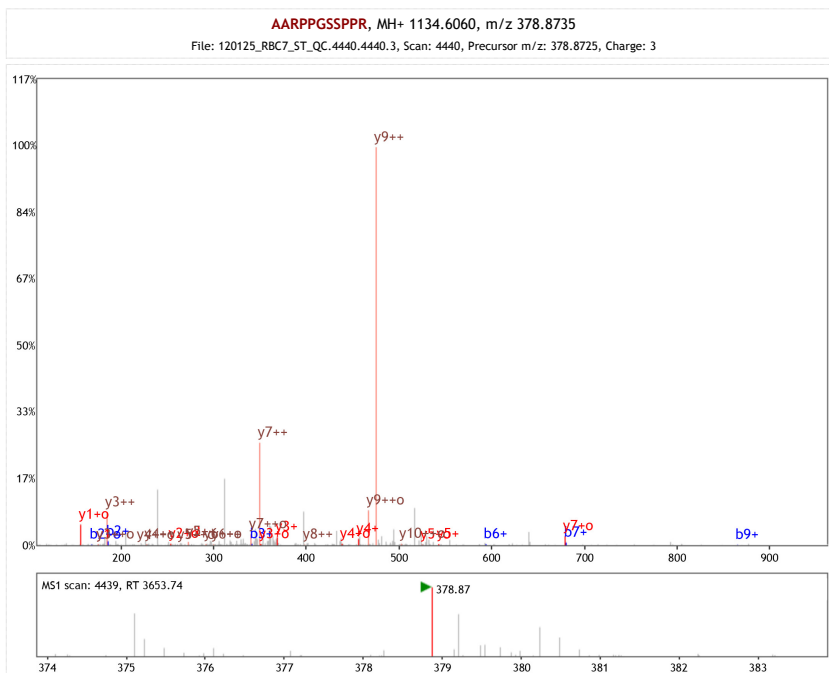

**Supplementary Figure S9. Evidence for missing protein PR domain zinc finger protein 15 (P57071):** Representative spectra out of a total of 35 spectra supporting peptide sequence AARPPGSSPPR

N $\alpha$  termini and N-acetylation status differentiate stable cleaved protein species from degradation remnants in the human erythrocyte proteome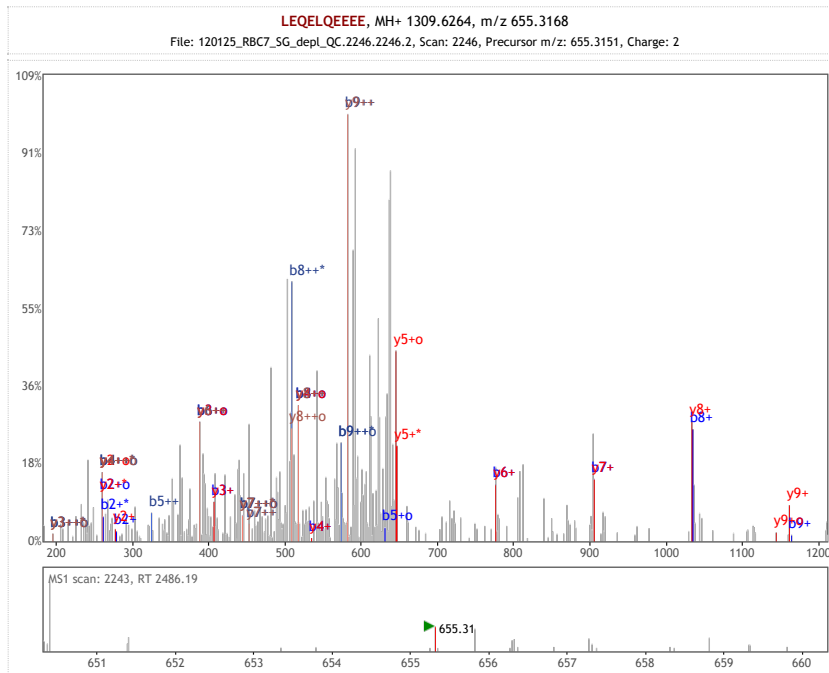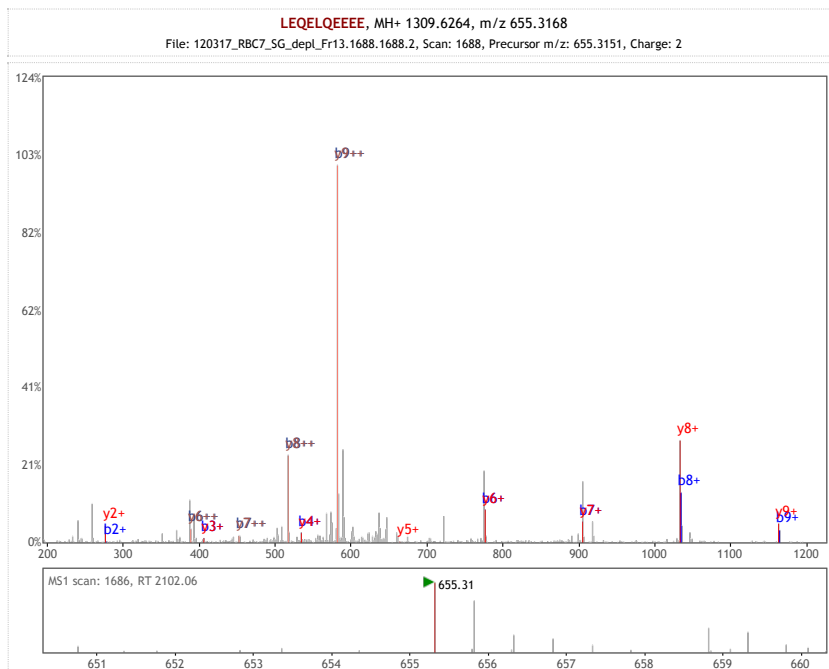

**Supplementary Figure S10. Evidence for missing protein protein FAM43A (Q8N2R8).** Spectra supporting peptide sequence LEQLQEEEE.

N $\alpha$  termini and N-acetylation status differentiate stable cleaved protein species from degradation remnants in the human erythrocyte proteome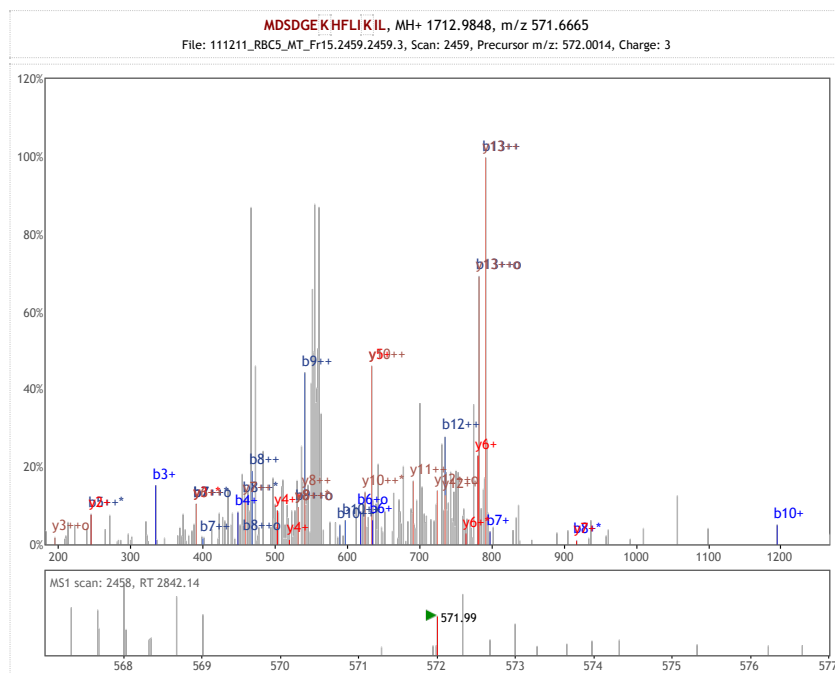

**Supplementary Figure S11. Evidence for missing protein ‘uncharacterized protein C9orf84’ (Q5VXU9). Representative spectrum for peptide MDS DGEKHFLIKIL.**

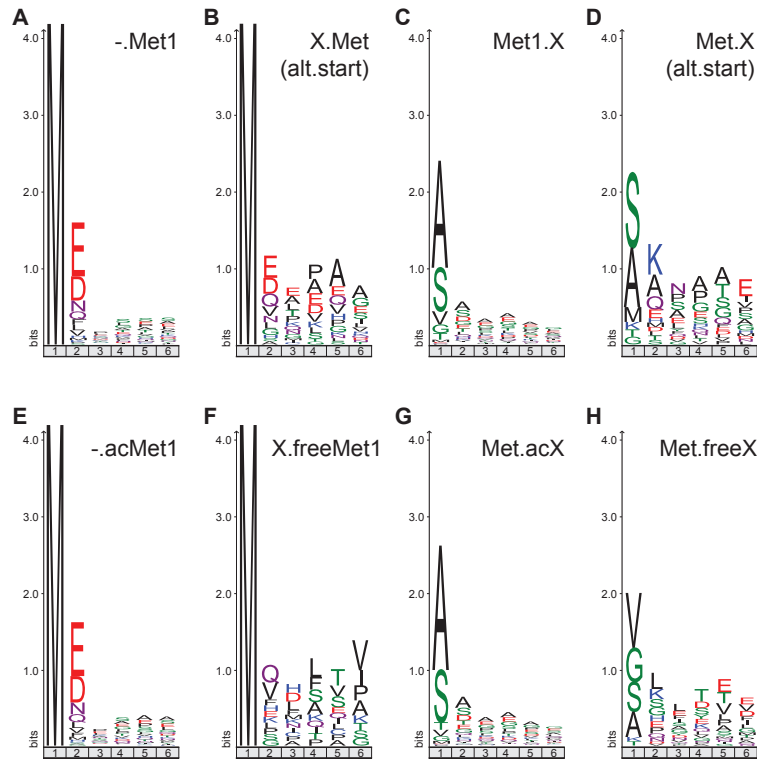

**Supplemental Figure S12. Sequence determinants of cotranslational Met processing and N-terminal acetylation in human erythrocytes.** Sequence logos representing A) 111 N termini with intact Met at position 1 of the gene-encoded protein sequence (-.Met1); B) 29 N termini with intact Met, mapping to positions >2 of the gene-encoded protein sequence, suggesting alternative translation start sites (X.Met); C) 304 N termini starting at position 2 after co-translational Met processing (Met1.X); D) 22 N termini with intact Met, mapping to positions >2 of the gene-encoded protein sequence, suggesting Met processing at alternative translation start sites (Met.X); E) 126 acetylated N termini starting with Met (combined canonical and alternative start sites, -.acMet); F) 14 free N termini starting with Met (combined canonical and alternative start sites, -.freeMet); G) 289 N termini acetylated after Met processing (combined canonical and alternative start sites, Met.acX); H) 36 free Met-processed N termini (combined canonical and alternative start sites, Met.freeX).
